# Supplementary material for: MPA_Pathway_Tool: User-Friendly, Automatic Assignment of Microbial Community Data on Metabolic Pathways
Source: Int J Mol Sci. 2021 Oct 12;22(20):10992. doi: 10.3390/ijms222010992 (PMC8539661; doi:10.3390/ijms222010992)
Supplement: Supplementary file 1 [file ijms-22-10992-s001.zip]

Archive with 20 entries (20 files):
- Supp. file 1_result table Calculator.csv
- Supp. file 10_BGP-Wood-Ljungdahl single pathway mapping.csv
- Supp. file 11_BGP-hydrogenotrophic Methanogenesis single pathway mapping.csv
- Supp. file 12_BGP-acetoclastic Methanogenesis single pathway mapping.csv
- Supp. file 13_KEGG-Wood-Lungdahl single pathway mapping.csv
- Supp. file 14_KEGG-hydrogenotrophic Methanogenesis single pathway mapping.csv
- Supp. file 15_KEGG-acetoclastic methanogenesis single pathway mapping.csv
- Supp. file 16_format for experimental data.csv
- Supp. file 17_Tutorial MPA_Pathway_Tool.pdf
- Supp. file 18_Reasons for differences in mapping.txt
- Supp. file 19_EC numbers.xlsx
- Supp. file 2_unmatched Proteins.csv
- Supp. file 20_external experimental data Buettner, Bergen et al.xlsx
- Supp. file 3_BGP-WoodLjungdahl pathway.svg
- Supp. file 4_BGP-hydrogenotrophic methanogenesis.svg
- Supp. file 5_BGP-acetoclastic methanogenesis.svg
- Supp. file 6_KEGG-Wood-Ljungdahl pathway.svg
- Supp. file 7_KEGG-hydrogenotrophic methanogenesis.svg
- Supp. file 8_KEGG-acetoclastic methanogenesis.svg
- Supp. file 9_Metaproteomics data.csv
