# Supplementary material for: MPA_Pathway_Tool: User-Friendly, Automatic Assignment of Microbial Community Data on Metabolic Pathways
Source: Int J Mol Sci. 2021 Oct 12;22(20):10992. doi: 10.3390/ijms222010992 (PMC8539661; doi:10.3390/ijms222010992)
Supplement: Supplementary file 1 [file ijms-22-10992-s001.zip › Supp. file 1_result table Calculator.csv]

Module	module-name	Steps found	Total steps module	kingdom
WoodLjungdahlKEGGModule.csv	WoodLjungdahlKEGGModule.csv	9.0	9.0	2205.0	1698.0	647.0	402.0	126.0	96.0	375.0	194.0	499.0	540.0	257.0	287.0	1009.0	829.0	1579.0	949.0	1022.0	1216.0	570.0	492.0	216.0	246.0	176.0	259.0	1144.0	1066.0	1556.0	1222.0	2060.0	1900.0	1144.0	1533.0	935.0	876.0	1264.0	1167.0	1059.0	1027.0	1054.0	794.0	6.0	17.0	12.0	24.0
acetoclasticMethanogenesisUser.csv	acetoclasticMethanogenesisUser.csv	3.0	6.0	0.0	5.0	123.0	65.0	406.0	400.0	1271.0	1131.0	1160.0	1341.0	544.0	491.0	4.0	5.0	0.0	0.0	1.0	2.0	0.0	0.0	297.0	418.0	453.0	424.0	0.0	0.0	0.0	0.0	0.0	0.0	0.0	1.0	367.0	390.0	442.0	428.0	2.0	0.0	38.0	34.0	38.0	126.0	55.0	159.0
hydrogenotrophicMethanogenesisUser.csv	hydrogenotrophicMethanogenesisUser.csv	7.0	8.0	1185.0	843.0	297.0	151.0	823.0	836.0	923.0	906.0	458.0	424.0	346.0	351.0	341.0	268.0	310.0	270.0	341.0	348.0	273.0	407.0	289.0	330.0	972.0	949.0	510.0	503.0	591.0	435.0	522.0	365.0	305.0	329.0	303.0	257.0	419.0	343.0	339.0	319.0	808.0	688.0	45.0	271.0	67.0	425.0
hydrogenotrophicMethanogenesisKEGGModule.csv	hydrogenotrophicMethanogenesisKEGGModule.csv	13.0	13.0	1668.0	1408.0	306.0	258.0	501.0	506.0	781.0	782.0	418.0	442.0	230.0	269.0	535.0	441.0	500.0	391.0	578.0	390.0	241.0	512.0	205.0	247.0	988.0	975.0	429.0	386.0	404.0	328.0	517.0	371.0	276.0	312.0	182.0	187.0	264.0	231.0	180.0	318.0	714.0	564.0	68.0	278.0	75.0	525.0
acetoclasticMethanogenesisKEGGModule.csv	acetoclasticMethanogenesisKEGGModule.csv	8.0	11.0	967.0	962.0	318.0	280.0	545.0	552.0	1173.0	1030.0	780.0	931.0	446.0	428.0	303.0	281.0	334.0	223.0	351.0	215.0	82.0	219.0	259.0	339.0	372.0	343.0	209.0	210.0	223.0	153.0	193.0	166.0	97.0	129.0	307.0	352.0	400.0	362.0	104.0	185.0	322.0	254.0	81.0	178.0	87.0	479.0
WoodLjungdahlUser.csv	WoodLjungdahlUser.csv	6.0	6.0	1600.0	1230.0	422.0	280.0	106.0	84.0	335.0	153.0	403.0	417.0	217.0	242.0	789.0	649.0	1269.0	754.0	784.0	952.0	430.0	397.0	178.0	190.0	142.0	214.0	992.0	952.0	1329.0	1033.0	1621.0	1560.0	997.0	1272.0	916.0	856.0	1219.0	1144.0	925.0	867.0	937.0	725.0	1.0	7.0	10.0	23.0
