# Supplementary material for: MPA_Pathway_Tool: User-Friendly, Automatic Assignment of Microbial Community Data on Metabolic Pathways
Source: Int J Mol Sci. 2021 Oct 12;22(20):10992. doi: 10.3390/ijms222010992 (PMC8539661; doi:10.3390/ijms222010992)
Supplement: Supplementary file 1 [file ijms-22-10992-s001.zip › Supp. file 2_unmatched Proteins.csv]

name,KO- numebrs,EC- numbers,BGP_02_T1_Ext1,BGP_02_T1_Ext2,BGP_02_T2_Ext1,BGP_02_T2_Ext2,BGP_03_T1_Ext1,BGP_03_T1_Ext2,BGP_03_T2_Ext1,BGP_03_T2_Ext2,BGP_04_T1_Ext1,BGP_04_T1_Ext2,BGP_04_T2_Ext1,BGP_04_T2_Ext2,BGP_05a_T1_Ext1,BGP_05a_T1_Ext2,BGP_05a_T2_Ext1,BGP_05a_T2_Ext2,BGP_05b_T1_Ext1,BGP_05b_T1_Ext2,BGP_05b_T2_Ext1,BGP_05b_T2_Ext2,BGP_07_T1_Ext1,BGP_07_T1_Ext2,BGP_07_T2_Ext1,BGP_07_T2_Ext2,BG…
MG: Uncharacterized protein Mb1359 OS=Mycobacterium bovis (strain ATCC BAA-935 / AF2122/97) GN=Mb1359 PE=3 SV=1 [P64808] Score: 117.0	K05838	UNKNOWN	0.0,0.0,0.0,0.0,0.0,0.0,0.0,0.0,0.0,0.0,0.0,0.0,0.0,0.0,0.0,0.0,0.0,0.0,0.0,0.0,0.0,0.0,0.0,0.0,0.0,0.0,0.0,0.0,0.0,0.0,0.0,0.0,0.0,0.0,0.0,0.0,0.0,0.0,0.0,0.0,0.0,0.0,0.0,1.0
MG: Putative lipoprotein NMB1126/NMB1164 OS=Neisseria meningitidis serogroup B (strain MC58) GN=NMB1126 PE=1 SV=1 [Q7DDH4] Score: 112.0	UNKNOWN	UNKNOWN	0.0,0.0,0.0,0.0,2.0,1.0,13.0,7.0,0.0,0.0,0.0,0.0,0.0,0.0,0.0,0.0,0.0,0.0,0.0,0.0,1.0,1.0,0.0,0.0,0.0,0.0,0.0,0.0,0.0,0.0,0.0,0.0,0.0,0.0,0.0,0.0,0.0,0.0,7.0,1.0,0.0,0.0,3.0,14.0
Y1325_METJA Uncharacterized HTH-type transcriptional regulator MJ1325 OS=Methanocaldococcus jannaschii (strain ATCC 43067 / DSM 2661 / JAL-1 / JCM 10045 / NBRC 100440) GN=MJ1325 PE=3 SV=1	K03892	UNKNOWN	0.0,0.0,0.0,0.0,0.0,0.0,0.0,0.0,0.0,0.0,0.0,2.0,0.0,0.0,0.0,0.0,0.0,0.0,0.0,0.0,6.0,4.0,0.0,0.0,0.0,0.0,0.0,0.0,2.0,3.0,1.0,4.0,0.0,0.0,0.0,0.0,0.0,0.0,0.0,0.0,0.0,0.0,0.0,0.0
MG: Glutamine-binding periplasmic protein OS=Escherichia coli (strain K12) GN=glnH PE=1 SV=1 [P0AEQ3] Score: 180.0	K10036	UNKNOWN	7.0,7.0,8.0,9.0,33.0,39.0,60.0,74.0,84.0,64.0,40.0,45.0,3.0,2.0,7.0,2.0,3.0,2.0,3.0,0.0,24.0,37.0,17.0,18.0,7.0,10.0,18.0,3.0,23.0,25.0,23.0,42.0,8.0,5.0,22.0,6.0,13.0,5.0,60.0,38.0,2.0,10.0,9.0,68.0
PLAK_PIG Junction plakoglobin OS=Sus scrofa GN=Jup PE=2 SV=1	K10056	UNKNOWN	1.0,0.0,0.0,17.0,0.0,4.0,0.0,0.0,0.0,0.0,7.0,4.0,0.0,0.0,0.0,0.0,0.0,0.0,0.0,1.0,0.0,0.0,0.0,2.0,7.0,0.0,1.0,14.0,0.0,0.0,3.0,2.0,0.0,3.0,7.0,10.0,9.0,22.0,0.0,5.0,26.0,11.0,25.0,0.0
MG: 4-hydroxy-tetrahydrodipicolinate synthase OS=Methanoculleus marisnigri (strain ATCC 35101 / DSM 1498 / JR1) GN=dapA PE=3 SV=1 [A3CVI7] Score: 518.0	K01714	4.3.3.7	36.0,32.0,2.0,0.0,67.0,30.0,54.0,37.0,27.0,48.0,32.0,27.0,15.0,20.0,19.0,8.0,9.0,1.0,0.0,0.0,10.0,12.0,18.0,16.0,39.0,28.0,38.0,32.0,75.0,51.0,44.0,53.0,17.0,23.0,24.0,22.0,79.0,61.0,91.0,66.0,2.0,10.0,2.0,12.0
KPYK2_SYNY3 Pyruvate kinase 2 OS=Synechocystis sp. (strain PCC 6803 / Kazusa) GN=pyk2 PE=3 SV=1	K00873	2.7.1.40	0.0,0.0,0.0,0.0,0.0,0.0,0.0,0.0,1.0,1.0,0.0,1.0,0.0,0.0,0.0,0.0,0.0,0.0,0.0,0.0,0.0,0.0,0.0,0.0,0.0,0.0,0.0,0.0,0.0,0.0,0.0,0.0,0.0,0.0,0.0,0.0,0.0,0.0,0.0,0.0,0.0,0.0,0.0,0.0
MG: Glutaconyl-CoA decarboxylase subunit alpha OS=Acidaminococcus fermentans (strain ATCC 25085 / DSM 20731 / VR4) GN=gcdA PE=1 SV=1 [Q06700] Score: 239.0	K01615	4.1.1.70	0.0,0.0,0.0,0.0,0.0,0.0,0.0,1.0,0.0,0.0,1.0,0.0,0.0,0.0,0.0,0.0,0.0,0.0,0.0,0.0,0.0,0.0,0.0,0.0,0.0,0.0,0.0,0.0,0.0,0.0,0.0,0.0,0.0,0.0,0.0,0.0,0.0,0.0,0.0,0.0,0.0,0.0,0.0,0.0
MG: Probable GTP-binding protein EngB OS=Eubacterium eligens (strain ATCC 27750 / VPI C15-48) GN=engB PE=3 SV=1 [C4Z1T3] Score: 233.0	K03978	UNKNOWN	0.0,0.0,0.0,0.0,0.0,0.0,0.0,0.0,0.0,0.0,0.0,0.0,0.0,0.0,0.0,0.0,0.0,0.0,1.0,0.0,0.0,0.0,0.0,0.0,0.0,0.0,0.0,2.0,0.0,0.0,0.0,0.0,0.0,0.0,0.0,0.0,0.0,0.0,0.0,0.0,0.0,0.0,0.0,0.0
HIS4_SHISS 1-(5-phosphoribosyl)-5-[(5-phosphoribosylamino)methylideneamino] imidazole-4-carboxamide isomerase OS=Shigella sonnei (strain Ss046) GN=hisA PE=3 SV=1	K01814	5.3.1.16	0.0,0.0,0.0,0.0,0.0,0.0,0.0,0.0,0.0,0.0,0.0,0.0,0.0,0.0,0.0,0.0,0.0,0.0,0.0,0.0,0.0,0.0,0.0,0.0,0.0,0.0,0.0,0.0,0.0,0.0,0.0,0.0,0.0,0.0,0.0,0.0,0.0,0.0,0.0,0.0,0.0,0.0,3.0,0.0
MG: Intracellular exo-alpha-L-arabinofuranosidase OS=Bacteroides ovatus GN=asdII PE=3 SV=1 [Q59219] Score: 122.0	UNKNOWN	3.2.1.55	0.0,0.0,0.0,0.0,0.0,0.0,0.0,0.0,0.0,0.0,0.0,0.0,0.0,0.0,0.0,0.0,0.0,0.0,0.0,0.0,0.0,0.0,0.0,0.0,2.0,4.0,3.0,0.0,0.0,0.0,0.0,0.0,0.0,0.0,0.0,0.0,0.0,0.0,0.0,0.0,0.0,0.0,0.0,0.0
UBP7_ARATH Ubiquitin carboxyl-terminal hydrolase 7 OS=Arabidopsis thaliana GN=UBP7 PE=1 SV=1	K11843	3.4.19.12	0.0,0.0,0.0,0.0,0.0,0.0,0.0,0.0,0.0,0.0,0.0,0.0,2.0,0.0,0.0,0.0,0.0,0.0,0.0,0.0,0.0,0.0,0.0,0.0,0.0,0.0,0.0,0.0,0.0,0.0,0.0,0.0,0.0,0.0,0.0,0.0,0.0,0.0,0.0,0.0,0.0,0.0,0.0,0.0
MG: Molybdopterin molybdenumtransferase 1 OS=Mycobacterium tuberculosis (strain ATCC 25618 / H37Rv) GN=moeA1 PE=1 SV=1 [P9WJQ7] Score: 479.0	K03750	2.10.1.1	0.0,0.0,0.0,0.0,0.0,0.0,0.0,0.0,0.0,0.0,0.0,0.0,0.0,0.0,0.0,0.0,0.0,0.0,0.0,0.0,1.0,0.0,0.0,0.0,0.0,0.0,0.0,0.0,0.0,0.0,0.0,0.0,0.0,0.0,0.0,0.0,0.0,0.0,0.0,0.0,0.0,0.0,0.0,0.0
SCM_DROME Polycomb protein Scm OS=Drosophila melanogaster GN=Scm PE=1 SV=2	K11461	UNKNOWN	0.0,0.0,0.0,0.0,0.0,0.0,0.0,0.0,0.0,0.0,0.0,0.0,0.0,2.0,0.0,0.0,0.0,0.0,0.0,1.0,0.0,0.0,0.0,0.0,0.0,0.0,0.0,0.0,0.0,0.0,0.0,0.0,0.0,0.0,0.0,0.0,0.0,0.0,0.0,0.0,0.0,0.0,0.0,0.0
HDDC2_MOUSE HD domain-containing protein 2 OS=Mus musculus GN=Hddc2 PE=1 SV=1	K07023	UNKNOWN	0.0,0.0,1.0,0.0,2.0,0.0,0.0,0.0,4.0,1.0,1.0,0.0,1.0,0.0,2.0,0.0,2.0,2.0,0.0,0.0,0.0,0.0,0.0,0.0,1.0,0.0,0.0,0.0,0.0,0.0,0.0,0.0,2.0,2.0,5.0,5.0,1.0,2.0,0.0,0.0,0.0,0.0,0.0,0.0
RF3_NITOC Peptide chain release factor 3 OS=Nitrosococcus oceani (strain ATCC 19707 / NCIMB 11848) GN=prfC PE=3 SV=1	K02837	UNKNOWN	0.0,0.0,0.0,0.0,0.0,0.0,0.0,0.0,0.0,0.0,0.0,0.0,0.0,0.0,0.0,0.0,0.0,0.0,0.0,0.0,0.0,0.0,0.0,0.0,1.0,0.0,0.0,0.0,0.0,0.0,1.0,0.0,0.0,0.0,0.0,0.0,0.0,0.0,0.0,0.0,0.0,0.0,3.0,0.0
MG: Alanine--tRNA ligase OS=Methanosarcina mazei (strain ATCC BAA-159 / DSM 3647 / Goe1 / Go1 / JCM 11833 / OCM 88) GN=alaS PE=3 SV=1 [Q8PWU0] Score: 987.0	K01872	6.1.1.7	0.0,0.0,0.0,0.0,0.0,1.0,2.0,1.0,0.0,2.0,0.0,1.0,0.0,0.0,0.0,0.0,0.0,0.0,0.0,0.0,0.0,0.0,0.0,0.0,1.0,0.0,3.0,6.0,0.0,0.0,0.0,2.0,0.0,0.0,0.0,0.0,0.0,0.0,0.0,2.0,0.0,0.0,0.0,0.0
MG: Intracellular exo-alpha-L-arabinofuranosidase 2 OS=Bacillus subtilis (strain 168) GN=abf2 PE=1 SV=2 [P94552] Score: 538.0	K01209	3.2.1.55	1.0,1.0,0.0,0.0,0.0,0.0,0.0,0.0,0.0,0.0,0.0,0.0,26.0,13.0,45.0,39.0,20.0,40.0,17.0,8.0,0.0,0.0,0.0,0.0,2.0,2.0,4.0,1.0,0.0,0.0,0.0,0.0,0.0,0.0,4.0,2.0,1.0,0.0,0.0,0.0,0.0,0.0,0.0,0.0
MG: 30S ribosomal protein S12 OS=Moorella thermoacetica (strain ATCC 39073) GN=rpsL PE=3 SV=1 [Q2RFP2] Score: 218.0	K02950	UNKNOWN	0.0,0.0,8.0,6.0,0.0,0.0,0.0,0.0,0.0,0.0,0.0,0.0,14.0,6.0,5.0,4.0,5.0,3.0,0.0,0.0,0.0,0.0,0.0,0.0,0.0,0.0,0.0,0.0,0.0,0.0,0.0,0.0,0.0,0.0,0.0,0.0,1.0,0.0,0.0,1.0,0.0,0.0,0.0,0.0
KUP_BDEBA Probable potassium transport system protein kup OS=Bdellovibrio bacteriovorus (strain ATCC 15356 / DSM 50701 / NCIB 9529 / HD100) GN=kup PE=3 SV=1	K03549	UNKNOWN	0.0,0.0,0.0,0.0,0.0,0.0,0.0,0.0,0.0,0.0,0.0,0.0,0.0,0.0,0.0,0.0,0.0,0.0,0.0,0.0,0.0,0.0,0.0,0.0,0.0,0.0,0.0,0.0,1.0,0.0,0.0,0.0,0.0,0.0,0.0,0.0,0.0,0.0,0.0,0.0,0.0,0.0,0.0,0.0
MG: ComG operon protein 3 homolog OS=Bacillus halodurans (strain ATCC BAA-125 / DSM 18197 / FERM 7344 / JCM 9153 / C-125) GN=comGC PE=3 SV=1 [Q9K923] Score: 58.2	K02245	UNKNOWN	0.0,0.0,1.0,1.0,2.0,0.0,1.0,0.0,1.0,1.0,0.0,3.0,0.0,0.0,0.0,0.0,0.0,0.0,0.0,0.0,3.0,3.0,0.0,1.0,0.0,0.0,0.0,0.0,0.0,1.0,1.0,3.0,1.0,0.0,0.0,0.0,0.0,0.0,4.0,4.0,0.0,0.0,0.0,0.0
MG: 3 beta-hydroxysteroid dehydrogenase/Delta 5-->4-isomerase OS=Mycobacterium tuberculosis (strain ATCC 25618 / H37Rv) GN=Rv1106c PE=1 SV=1 [P9WQP7] Score: 79.0	K16045	1.1.1.145,5.3.3.1	0.0,0.0,0.0,0.0,0.0,0.0,0.0,0.0,0.0,0.0,0.0,0.0,0.0,0.0,0.0,0.0,0.0,0.0,0.0,0.0,0.0,0.0,0.0,0.0,0.0,0.0,0.0,0.0,0.0,0.0,0.0,0.0,0.0,0.0,0.0,0.0,0.0,0.0,3.0,0.0,0.0,0.0,0.0,2.0
PCAT2_HUMAN Lysophosphatidylcholine acyltransferase 2 OS=Homo sapiens GN=LPCAT2 PE=1 SV=1	K13510	2.3.1.23,2.3.1.67,2.3.1.51	0.0,0.0,0.0,0.0,0.0,0.0,0.0,0.0,0.0,0.0,0.0,0.0,0.0,0.0,0.0,0.0,0.0,0.0,0.0,0.0,0.0,0.0,0.0,0.0,1.0,0.0,0.0,0.0,0.0,0.0,0.0,0.0,0.0,0.0,0.0,0.0,0.0,0.0,0.0,0.0,0.0,0.0,0.0,0.0
MG: Sec-independent protein translocase protein TatA OS=Bacillus clausii (strain KSM-K16) GN=tatA PE=3 SV=1 [Q5WJP2] Score: 77.8	K03116	UNKNOWN	0.0,0.0,0.0,0.0,0.0,0.0,0.0,0.0,0.0,0.0,0.0,0.0,0.0,0.0,0.0,0.0,0.0,0.0,0.0,0.0,0.0,0.0,0.0,0.0,0.0,0.0,0.0,0.0,0.0,0.0,1.0,0.0,0.0,0.0,0.0,0.0,0.0,0.0,0.0,0.0,0.0,0.0,0.0,0.0
HBB_CHLME Hemoglobin subunit beta OS=Chloephaga melanoptera GN=HBB PE=1 SV=1	UNKNOWN	UNKNOWN	0.0,0.0,0.0,0.0,0.0,0.0,0.0,0.0,0.0,0.0,0.0,0.0,0.0,0.0,0.0,0.0,0.0,0.0,0.0,0.0,0.0,0.0,0.0,0.0,3.0,1.0,3.0,5.0,0.0,4.0,0.0,0.0,3.0,2.0,2.0,0.0,0.0,0.0,0.0,0.0,1.0,0.0,0.0,0.0
AROG_ECOLI Phospho-2-dehydro-3-deoxyheptonate aldolase, Phe-sensitive OS=Escherichia coli (strain K12) GN=aroG PE=1 SV=1	K01626	2.5.1.54	0.0,0.0,0.0,0.0,0.0,0.0,0.0,0.0,0.0,0.0,0.0,0.0,0.0,0.0,0.0,0.0,0.0,0.0,0.0,0.0,0.0,0.0,0.0,0.0,0.0,0.0,0.0,0.0,0.0,0.0,0.0,0.0,0.0,0.0,0.0,0.0,0.0,0.0,0.0,0.0,0.0,0.0,1.0,0.0
SAM50_RAT Sorting and assembly machinery component 50 homolog OS=Rattus norvegicus GN=Samm50 PE=1 SV=1	K07277	UNKNOWN	0.0,0.0,0.0,0.0,0.0,0.0,0.0,0.0,0.0,0.0,0.0,0.0,0.0,0.0,0.0,0.0,0.0,0.0,0.0,0.0,0.0,0.0,0.0,0.0,0.0,0.0,0.0,0.0,0.0,0.0,0.0,0.0,0.0,0.0,0.0,0.0,0.0,0.0,0.0,0.0,1.0,0.0,0.0,0.0
MG: Hypoxanthine-guanine phosphoribosyltransferase OS=Streptococcus mutans serotype c (strain ATCC 700610 / UA159) GN=hpt PE=3 SV=1 [Q8DWM8] Score: 333.0	K00760	2.4.2.8	0.0,0.0,1.0,1.0,0.0,0.0,0.0,0.0,0.0,0.0,0.0,0.0,0.0,0.0,0.0,0.0,0.0,0.0,0.0,0.0,0.0,0.0,0.0,0.0,0.0,0.0,0.0,0.0,0.0,0.0,0.0,0.0,0.0,0.0,0.0,0.0,0.0,0.0,4.0,5.0,0.0,0.0,0.0,0.0
MG: Uncharacterized HAD-hydrolase MK0970 OS=Methanopyrus kandleri (strain AV19 / DSM 6324 / JCM 9639 / NBRC 100938) GN=MK0970 PE=3 SV=2 [Q8TWR2] Score: 57.8	K07025	3.1.3.-	0.0,0.0,0.0,0.0,0.0,0.0,0.0,0.0,0.0,0.0,0.0,0.0,0.0,0.0,0.0,0.0,0.0,0.0,1.0,0.0,0.0,0.0,0.0,0.0,0.0,0.0,0.0,0.0,0.0,0.0,0.0,0.0,0.0,0.0,0.0,0.0,0.0,0.0,0.0,0.0,0.0,0.0,0.0,0.0
MG: Protein translocase subunit SecE OS=Bacillus halodurans (strain ATCC BAA-125 / DSM 18197 / FERM 7344 / JCM 9153 / C-125) GN=secE PE=3 SV=1 [Q9KGE8] Score: 45.4	K03073	UNKNOWN	0.0,0.0,0.0,0.0,0.0,0.0,0.0,0.0,0.0,0.0,0.0,0.0,27.0,12.0,13.0,16.0,18.0,24.0,10.0,11.0,0.0,0.0,0.0,0.0,0.0,0.0,0.0,0.0,0.0,0.0,0.0,0.0,0.0,0.0,0.0,0.0,0.0,0.0,0.0,0.0,0.0,0.0,0.0,0.0
SSH4_NEUCR Protein ssh4 OS=Neurospora crassa (strain ATCC 24698 / 74-OR23-1A / CBS 708.71 / DSM 1257 / FGSC 987) GN=ssh4 PE=3 SV=2	UNKNOWN	UNKNOWN	0.0,0.0,0.0,0.0,0.0,1.0,0.0,0.0,0.0,0.0,0.0,0.0,0.0,0.0,0.0,0.0,0.0,0.0,0.0,0.0,0.0,0.0,0.0,0.0,0.0,0.0,0.0,0.0,0.0,0.0,0.0,0.0,0.0,0.0,0.0,0.0,0.0,1.0,0.0,0.0,0.0,0.0,0.0,0.0
MACF1_MOUSE Microtubule-actin cross-linking factor 1 OS=Mus musculus GN=Macf1 PE=1 SV=2	UNKNOWN	UNKNOWN	0.0,0.0,0.0,0.0,0.0,0.0,0.0,0.0,0.0,0.0,0.0,0.0,0.0,0.0,1.0,0.0,0.0,0.0,0.0,0.0,0.0,0.0,0.0,0.0,0.0,0.0,0.0,0.0,0.0,0.0,0.0,0.0,0.0,0.0,0.0,0.0,0.0,0.0,0.0,0.0,0.0,0.0,0.0,0.0
HIS8_VIBCM Histidinol-phosphate aminotransferase OS=Vibrio cholerae serotype O1 (strain M66-2) GN=hisC PE=3 SV=1	K00817	2.6.1.9	0.0,0.0,0.0,0.0,0.0,0.0,0.0,0.0,0.0,0.0,0.0,0.0,0.0,0.0,0.0,0.0,0.0,0.0,0.0,0.0,0.0,0.0,0.0,0.0,0.0,0.0,0.0,0.0,0.0,0.0,0.0,0.0,0.0,0.0,0.0,0.0,0.0,0.0,0.0,0.0,0.0,0.0,4.0,0.0
MG: Desulfoferrodoxin OS=Pelobacter carbinolicus (strain DSM 2380 / Gra Bd 1) GN=dfx PE=3 SV=1 [Q3A221] Score: 63.5	K05919	1.15.1.2	9.0,6.0,8.0,4.0,7.0,9.0,12.0,17.0,12.0,8.0,10.0,9.0,0.0,0.0,0.0,0.0,1.0,0.0,0.0,0.0,19.0,14.0,15.0,24.0,0.0,0.0,0.0,0.0,3.0,5.0,9.0,7.0,0.0,0.0,0.0,0.0,0.0,0.0,19.0,29.0,1.0,1.0,3.0,13.0
MG: Uncharacterized protein BB_0173 OS=Borrelia burgdorferi (strain ATCC 35210 / B31 / CIP 102532 / DSM 4680) GN=BB_0173 PE=3 SV=1 [O51195] Score: 112.0	UNKNOWN	UNKNOWN	0.0,1.0,1.0,0.0,0.0,0.0,0.0,0.0,0.0,0.0,0.0,1.0,0.0,0.0,0.0,0.0,0.0,0.0,0.0,0.0,0.0,0.0,0.0,0.0,0.0,0.0,0.0,0.0,0.0,0.0,0.0,0.0,0.0,0.0,0.0,0.0,0.0,0.0,0.0,0.0,0.0,0.0,0.0,0.0
MG: 30S ribosomal protein S18 OS=Clostridium thermocellum (strain ATCC 27405 / DSM 1237 / NBRC 103400 / NCIMB 10682 / NRRL B-4536 / VPI 7372) GN=rpsR PE=3 SV=1 [A3DHF8] Score: 113.0	K02963	UNKNOWN	0.0,0.0,0.0,0.0,1.0,0.0,0.0,0.0,0.0,0.0,0.0,0.0,0.0,0.0,0.0,0.0,0.0,0.0,0.0,0.0,0.0,0.0,0.0,0.0,0.0,0.0,0.0,0.0,0.0,0.0,0.0,0.0,0.0,0.0,0.0,0.0,0.0,0.0,0.0,0.0,0.0,0.0,0.0,0.0
PYRD_VIBF1 Dihydroorotate dehydrogenase (quinone) OS=Vibrio fischeri (strain ATCC 700601 / ES114) GN=pyrD PE=3 SV=1	K00254	1.3.5.2	0.0,0.0,0.0,0.0,0.0,0.0,0.0,0.0,0.0,0.0,0.0,0.0,0.0,0.0,0.0,0.0,0.0,0.0,0.0,0.0,0.0,0.0,0.0,0.0,0.0,0.0,0.0,0.0,1.0,0.0,0.0,0.0,0.0,0.0,0.0,0.0,0.0,0.0,0.0,0.0,0.0,0.0,0.0,0.0
MG: Outer membrane protein assembly factor BamA OS=Haemophilus influenzae GN=bamA PE=3 SV=1 [O32629] Score: 110.0	UNKNOWN	UNKNOWN	4.0,1.0,0.0,1.0,1.0,2.0,4.0,3.0,3.0,2.0,2.0,4.0,0.0,2.0,0.0,21.0,28.0,21.0,0.0,0.0,3.0,2.0,0.0,0.0,8.0,0.0,9.0,0.0,5.0,0.0,3.0,3.0,0.0,0.0,17.0,22.0,0.0,1.0,1.0,1.0,0.0,0.0,1.0,2.0
MG: 5'-AMP-activated protein kinase subunit beta-1 OS=Rattus norvegicus GN=Prkab1 PE=1 SV=4 [P80386] Score: 51.6	K07199	UNKNOWN	0.0,0.0,0.0,0.0,0.0,0.0,0.0,0.0,0.0,0.0,0.0,0.0,551.0,623.0,722.0,417.0,308.0,403.0,555.0,644.0,0.0,0.0,0.0,0.0,2.0,1.0,1.0,1.0,0.0,0.0,0.0,0.0,1.0,1.0,0.0,0.0,0.0,0.0,0.0,0.0,0.0,2.0,0.0,2.0
NDK_PROMA Nucleoside diphosphate kinase OS=Prochlorococcus marinus (strain SARG / CCMP1375 / SS120) GN=ndk PE=3 SV=2	K00940	2.7.4.6	0.0,0.0,0.0,0.0,0.0,7.0,0.0,0.0,0.0,0.0,0.0,0.0,0.0,0.0,0.0,0.0,0.0,0.0,0.0,0.0,0.0,0.0,0.0,0.0,0.0,0.0,0.0,0.0,0.0,0.0,0.0,0.0,0.0,0.0,0.0,0.0,0.0,0.0,0.0,0.0,0.0,0.0,0.0,0.0
MG: Modification methylase FnuDI OS=Fusobacterium nucleatum GN=fnuDIM PE=3 SV=1 [P34906] Score: 243.0	UNKNOWN	2.1.1.37	0.0,0.0,0.0,0.0,0.0,0.0,0.0,1.0,1.0,1.0,0.0,0.0,0.0,0.0,1.0,1.0,0.0,0.0,0.0,0.0,0.0,0.0,0.0,0.0,0.0,0.0,0.0,0.0,0.0,0.0,0.0,0.0,0.0,0.0,0.0,0.0,0.0,0.0,0.0,0.0,0.0,0.0,0.0,0.0
TRFE_RABIT Serotransferrin OS=Oryctolagus cuniculus GN=TF PE=1 SV=4	K14736	UNKNOWN	0.0,0.0,0.0,0.0,0.0,0.0,0.0,0.0,0.0,0.0,2.0,0.0,0.0,0.0,0.0,0.0,0.0,0.0,0.0,0.0,0.0,0.0,0.0,0.0,0.0,0.0,0.0,0.0,0.0,0.0,0.0,0.0,0.0,0.0,0.0,0.0,0.0,0.0,0.0,0.0,0.0,0.0,0.0,0.0
MG: UPF0148 protein AF_2370 OS=Archaeoglobus fulgidus (strain ATCC 49558 / VC-16 / DSM 4304 / JCM 9628 / NBRC 100126) GN=AF_2370 PE=3 SV=2 [O30300] Score: 53.5	K07143	UNKNOWN	0.0,0.0,0.0,0.0,0.0,0.0,0.0,0.0,0.0,0.0,0.0,0.0,1.0,3.0,6.0,1.0,3.0,3.0,0.0,2.0,0.0,0.0,0.0,0.0,0.0,0.0,0.0,0.0,1.0,0.0,0.0,0.0,0.0,0.0,0.0,0.0,0.0,0.0,4.0,2.0,0.0,0.0,0.0,0.0
RS15A_BRANA 40S ribosomal protein S15a OS=Brassica napus GN=RPS15A PE=2 SV=3	K02957	UNKNOWN	0.0,0.0,0.0,0.0,0.0,1.0,0.0,0.0,0.0,2.0,2.0,2.0,0.0,0.0,0.0,0.0,0.0,0.0,0.0,0.0,0.0,0.0,0.0,0.0,0.0,0.0,0.0,0.0,2.0,4.0,2.0,1.0,0.0,1.0,0.0,0.0,0.0,0.0,2.0,3.0,0.0,0.0,0.0,0.0
THIC_WIGBR Phosphomethylpyrimidine synthase OS=Wigglesworthia glossinidia brevipalpis GN=thiC PE=3 SV=1	UNKNOWN	4.1.99.17	0.0,0.0,0.0,0.0,0.0,0.0,0.0,0.0,0.0,0.0,0.0,0.0,0.0,0.0,0.0,0.0,0.0,0.0,1.0,0.0,0.0,0.0,0.0,0.0,0.0,0.0,0.0,0.0,0.0,0.0,0.0,0.0,0.0,0.0,0.0,0.0,0.0,0.0,0.0,0.0,0.0,0.0,0.0,0.0
MG: Ribonuclease Z OS=Pyrococcus furiosus (strain ATCC 43587 / DSM 3638 / JCM 8422 / Vc1) GN=rnz PE=1 SV=1 [Q8U182] Score: 84.0	K00784	3.1.26.11	0.0,0.0,0.0,0.0,0.0,0.0,0.0,0.0,0.0,0.0,0.0,0.0,0.0,0.0,0.0,0.0,0.0,0.0,0.0,0.0,0.0,0.0,0.0,0.0,0.0,1.0,0.0,0.0,0.0,0.0,0.0,0.0,0.0,0.0,0.0,0.0,0.0,0.0,0.0,0.0,0.0,0.0,0.0,0.0
MG: Uncharacterized WD repeat-containing protein alr2800 OS=Nostoc sp. (strain PCC 7120 / UTEX 2576) GN=alr2800 PE=3 SV=1 [Q8YTC2] Score: 109.0	UNKNOWN	UNKNOWN	0.0,0.0,0.0,0.0,0.0,0.0,0.0,0.0,1.0,2.0,3.0,2.0,0.0,3.0,3.0,1.0,2.0,3.0,0.0,0.0,0.0,0.0,0.0,0.0,0.0,0.0,0.0,0.0,0.0,0.0,0.0,0.0,0.0,0.0,0.0,0.0,0.0,0.0,0.0,0.0,0.0,0.0,0.0,0.0
MG: Uncharacterized ABC transporter ATP-binding protein y4oS OS=Rhizobium sp. (strain NGR234) GN=NGR_a02170 PE=3 SV=1 [P55604] Score: 172.0	K10112	UNKNOWN	0.0,0.0,0.0,0.0,0.0,0.0,0.0,0.0,0.0,0.0,0.0,0.0,0.0,0.0,0.0,0.0,0.0,0.0,28.0,28.0,0.0,0.0,33.0,42.0,0.0,0.0,0.0,0.0,0.0,0.0,0.0,0.0,0.0,0.0,0.0,0.0,0.0,0.0,0.0,0.0,0.0,0.0,0.0,0.0
MG: Adenosine monophosphate-protein transferase FICD homolog OS=Nematostella vectensis GN=v1g194069 PE=3 SV=1 [A7SVT1] Score: 56.6	UNKNOWN	2.7.7.n1	0.0,0.0,0.0,0.0,0.0,0.0,0.0,0.0,0.0,0.0,0.0,0.0,0.0,1.0,0.0,0.0,0.0,0.0,0.0,0.0,0.0,0.0,0.0,0.0,0.0,0.0,0.0,0.0,0.0,0.0,0.0,0.0,1.0,0.0,0.0,0.0,0.0,0.0,1.0,1.0,0.0,0.0,0.0,0.0
MG: Beta-galactosidase OS=Streptococcus thermophilus GN=lacZ PE=3 SV=1 [P23989] Score: 810.0	UNKNOWN	3.2.1.23	0.0,0.0,0.0,0.0,0.0,0.0,0.0,0.0,0.0,0.0,1.0,0.0,0.0,0.0,0.0,0.0,0.0,0.0,0.0,0.0,0.0,0.0,0.0,0.0,0.0,0.0,0.0,0.0,0.0,0.0,0.0,0.0,0.0,0.0,0.0,0.0,0.0,0.0,0.0,0.0,0.0,0.0,0.0,0.0
MG: Probable malate:quinone oxidoreductase OS=Campylobacter jejuni subsp. jejuni serotype O:2 (strain NCTC 11168) GN=mqo PE=3 SV=1 [P56954] Score: 526.0	K00116	1.1.5.4	0.0,0.0,0.0,0.0,0.0,0.0,0.0,0.0,0.0,0.0,0.0,0.0,0.0,0.0,0.0,0.0,0.0,0.0,0.0,0.0,0.0,0.0,0.0,0.0,0.0,0.0,0.0,0.0,1.0,0.0,0.0,0.0,0.0,0.0,0.0,0.0,0.0,0.0,0.0,0.0,0.0,0.0,0.0,0.0
MG: Transcription-repair-coupling factor OS=Mycobacterium bovis (strain ATCC BAA-935 / AF2122/97) GN=mfd PE=3 SV=1 [P64327] Score: 582.0	K03723	3.6.4.-	1.0,0.0,1.0,4.0,1.0,1.0,2.0,1.0,11.0,4.0,6.0,4.0,0.0,4.0,8.0,2.0,1.0,0.0,2.0,5.0,4.0,3.0,11.0,6.0,8.0,8.0,5.0,11.0,13.0,31.0,27.0,7.0,6.0,16.0,5.0,9.0,10.0,10.0,3.0,2.0,0.0,5.0,3.0,3.0
MG: Dihydroorotase OS=Pyrococcus abyssi (strain GE5 / Orsay) GN=pyrC PE=3 SV=1 [Q9UXV6] Score: 179.0	K01465	3.5.2.3	0.0,0.0,0.0,0.0,0.0,0.0,0.0,0.0,0.0,0.0,0.0,0.0,0.0,0.0,0.0,0.0,0.0,0.0,0.0,0.0,1.0,0.0,0.0,0.0,0.0,0.0,0.0,0.0,0.0,0.0,0.0,0.0,0.0,0.0,0.0,0.0,0.0,0.0,0.0,0.0,0.0,0.0,0.0,0.0
RL21_PELTS 50S ribosomal protein L21 OS=Pelotomaculum thermopropionicum (strain DSM 13744 / JCM 10971 / SI) GN=rplU PE=3 SV=1	K02888	UNKNOWN	0.0,0.0,0.0,0.0,0.0,0.0,0.0,0.0,0.0,0.0,0.0,0.0,0.0,0.0,0.0,0.0,0.0,0.0,0.0,0.0,0.0,0.0,0.0,0.0,0.0,0.0,0.0,0.0,0.0,0.0,0.0,0.0,0.0,0.0,0.0,0.0,0.0,0.0,0.0,0.0,0.0,0.0,2.0,3.0
MG: Peptidyl-prolyl cis-trans isomerase-like 1 OS=Neurospora crassa (strain ATCC 24698 / 74-OR23-1A / CBS 708.71 / DSM 1257 / FGSC 987) GN=ppi-1 PE=3 SV=2 [Q7SF72] Score: 166.0	K12733	5.2.1.8	1.0,2.0,0.0,0.0,14.0,26.0,3.0,14.0,12.0,3.0,12.0,6.0,0.0,1.0,0.0,0.0,4.0,0.0,0.0,0.0,0.0,0.0,0.0,0.0,2.0,0.0,0.0,1.0,1.0,0.0,0.0,1.0,0.0,0.0,0.0,1.0,1.0,2.0,6.0,4.0,0.0,0.0,1.0,0.0
MG: Pyrophosphate--fructose 6-phosphate 1-phosphotransferase OS=Rhodospirillum rubrum (strain ATCC 11170 / ATH 1.1.1 / DSM 467 / LMG 4362 / NCIB 8255 / S1) GN=pfp PE=1 SV=1 [Q2RNU4] Score: 270.0	K00850	2.7.1.90	0.0,0.0,0.0,0.0,0.0,0.0,0.0,0.0,0.0,1.0,1.0,0.0,0.0,0.0,0.0,0.0,0.0,0.0,0.0,0.0,0.0,1.0,1.0,1.0,6.0,10.0,16.0,20.0,1.0,0.0,2.0,1.0,10.0,11.0,15.0,8.0,2.0,0.0,2.0,0.0,0.0,0.0,0.0,2.0
MG: General secretion pathway protein A OS=Aeromonas hydrophila GN=exeA PE=3 SV=1 [P45754] Score: 97.8	UNKNOWN	UNKNOWN	0.0,0.0,0.0,0.0,0.0,0.0,0.0,0.0,0.0,0.0,0.0,0.0,0.0,0.0,0.0,0.0,0.0,2.0,0.0,0.0,0.0,0.0,0.0,0.0,1.0,0.0,0.0,0.0,0.0,0.0,0.0,0.0,0.0,0.0,0.0,0.0,0.0,0.0,0.0,0.0,0.0,1.0,0.0,1.0
TAS_SHIFL Protein tas OS=Shigella flexneri GN=tas PE=3 SV=1	UNKNOWN	UNKNOWN	0.0,0.0,0.0,0.0,0.0,0.0,0.0,0.0,0.0,0.0,0.0,0.0,0.0,0.0,0.0,0.0,0.0,0.0,0.0,0.0,0.0,0.0,0.0,0.0,0.0,0.0,0.0,0.0,0.0,0.0,0.0,0.0,0.0,0.0,0.0,0.0,0.0,0.0,0.0,0.0,0.0,0.0,1.0,0.0
MG: CRISPR-associated endoribonuclease Cas6 2 OS=Methanocaldococcus jannaschii (strain ATCC 43067 / DSM 2661 / JAL-1 / JCM 10045 / NBRC 100440) GN=cas6b PE=3 SV=1 [Q58631] Score: 177.0	K19091	3.1.-.-	0.0,0.0,0.0,0.0,0.0,0.0,1.0,0.0,1.0,1.0,0.0,0.0,0.0,0.0,0.0,0.0,0.0,0.0,0.0,0.0,0.0,0.0,0.0,0.0,0.0,0.0,0.0,0.0,0.0,0.0,0.0,0.0,0.0,0.0,0.0,0.0,0.0,0.0,0.0,0.0,0.0,0.0,1.0,0.0
H2AX_HUMAN Histone H2AX OS=Homo sapiens GN=H2AFX PE=1 SV=2	UNKNOWN	UNKNOWN	3.0,0.0,0.0,0.0,0.0,0.0,0.0,3.0,0.0,0.0,0.0,0.0,0.0,0.0,0.0,0.0,0.0,0.0,0.0,0.0,3.0,2.0,1.0,0.0,0.0,0.0,0.0,0.0,3.0,3.0,0.0,0.0,0.0,0.0,0.0,0.0,0.0,0.0,3.0,4.0,0.0,0.0,3.0,0.0
MG: Putative aminopeptidase YtoP OS=Bacillus subtilis (strain 168) GN=ytoP PE=3 SV=1 [O34924] Score: 65.9	UNKNOWN	3.4.11.-	0.0,0.0,0.0,0.0,7.0,17.0,12.0,13.0,0.0,0.0,0.0,1.0,1.0,0.0,0.0,2.0,0.0,0.0,0.0,1.0,0.0,2.0,3.0,4.0,0.0,0.0,0.0,0.0,0.0,0.0,0.0,0.0,0.0,0.0,0.0,0.0,0.0,0.0,3.0,2.0,0.0,0.0,0.0,0.0
RL27_CORGB 50S ribosomal protein L27 OS=Corynebacterium glutamicum (strain R) GN=rpmA PE=3 SV=1	K02899	UNKNOWN	0.0,0.0,0.0,1.0,0.0,0.0,0.0,0.0,0.0,0.0,0.0,0.0,0.0,0.0,0.0,0.0,0.0,0.0,0.0,0.0,0.0,0.0,0.0,0.0,0.0,0.0,0.0,0.0,0.0,0.0,0.0,0.0,0.0,0.0,0.0,0.0,0.0,0.0,0.0,0.0,0.0,0.0,0.0,0.0
MG: 2-C-methyl-D-erythritol 4-phosphate cytidylyltransferase OS=Clostridium novyi (strain NT) GN=ispD PE=3 SV=1 [A0PXS4] Score: 48.9	K00991	2.7.7.60	0.0,0.0,0.0,0.0,0.0,0.0,0.0,0.0,0.0,0.0,0.0,0.0,0.0,0.0,0.0,0.0,0.0,0.0,0.0,0.0,0.0,0.0,0.0,0.0,0.0,0.0,0.0,1.0,0.0,0.0,0.0,0.0,0.0,0.0,0.0,0.0,0.0,0.0,0.0,0.0,0.0,0.0,0.0,0.0
CLPX_STRT1 ATP-dependent Clp protease ATP-binding subunit ClpX OS=Streptococcus thermophilus (strain CNRZ 1066) GN=clpX PE=3 SV=1	K03544	UNKNOWN	0.0,0.0,1.0,0.0,0.0,2.0,4.0,0.0,0.0,2.0,0.0,0.0,0.0,1.0,0.0,0.0,0.0,0.0,0.0,0.0,3.0,2.0,0.0,0.0,0.0,0.0,0.0,0.0,0.0,0.0,0.0,0.0,0.0,0.0,0.0,2.0,7.0,8.0,4.0,0.0,6.0,0.0,15.0,0.0
GCH1_MOUSE GTP cyclohydrolase 1 OS=Mus musculus GN=Gch1 PE=1 SV=1	K01495	3.5.4.16	0.0,0.0,0.0,0.0,0.0,0.0,0.0,0.0,0.0,0.0,0.0,0.0,0.0,0.0,0.0,0.0,0.0,0.0,0.0,0.0,1.0,0.0,0.0,0.0,0.0,0.0,0.0,0.0,0.0,0.0,0.0,0.0,0.0,0.0,0.0,0.0,1.0,0.0,0.0,0.0,0.0,0.0,0.0,0.0
H2B_ACRFO Histone H2B OS=Acropora formosa PE=3 SV=1	UNKNOWN	UNKNOWN	0.0,0.0,0.0,0.0,0.0,0.0,0.0,0.0,0.0,0.0,4.0,0.0,0.0,0.0,0.0,0.0,0.0,0.0,0.0,15.0,6.0,4.0,6.0,8.0,2.0,6.0,4.0,4.0,0.0,0.0,0.0,0.0,0.0,0.0,2.0,0.0,0.0,0.0,0.0,12.0,0.0,0.0,0.0,0.0
1433_POPEU 14-3-3-like protein (Fragment) OS=Populus euphratica PE=1 SV=1	UNKNOWN	UNKNOWN	0.0,0.0,0.0,0.0,2.0,2.0,0.0,0.0,0.0,0.0,0.0,0.0,0.0,0.0,0.0,0.0,0.0,0.0,0.0,0.0,0.0,0.0,0.0,0.0,0.0,0.0,0.0,0.0,0.0,0.0,0.0,0.0,0.0,0.0,0.0,0.0,0.0,0.0,0.0,0.0,0.0,0.0,0.0,0.0
ATPE_MOOTA ATP synthase epsilon chain OS=Moorella thermoacetica (strain ATCC 39073) GN=atpC PE=1 SV=1	K02114	UNKNOWN	0.0,0.0,0.0,0.0,0.0,0.0,0.0,0.0,0.0,0.0,0.0,0.0,0.0,0.0,0.0,0.0,0.0,0.0,0.0,0.0,0.0,0.0,0.0,0.0,0.0,0.0,0.0,1.0,0.0,0.0,0.0,0.0,0.0,0.0,0.0,0.0,0.0,0.0,0.0,0.0,0.0,0.0,0.0,0.0
MTSB_METBA Methylated-thiol--corrinoid protein MtsB OS=Methanosarcina barkeri GN=mtsB PE=3 SV=1	UNKNOWN	UNKNOWN	0.0,0.0,0.0,0.0,6.0,6.0,24.0,28.0,19.0,21.0,8.0,7.0,0.0,0.0,0.0,0.0,0.0,0.0,0.0,0.0,4.0,3.0,8.0,7.0,1.0,0.0,1.0,0.0,2.0,1.0,0.0,0.0,4.0,3.0,4.0,3.0,1.0,3.0,5.0,3.0,0.0,2.0,2.0,13.0
SFSA_PYRNV Sugar fermentation stimulation protein homolog OS=Pyrobaculum neutrophilum (strain DSM 2338 / JCM 9278 / V24Sta) GN=sfsA PE=3 SV=1	K06206	UNKNOWN	0.0,0.0,0.0,0.0,1.0,1.0,0.0,2.0,1.0,1.0,0.0,1.0,0.0,0.0,0.0,0.0,0.0,0.0,0.0,0.0,1.0,0.0,0.0,0.0,0.0,0.0,0.0,0.0,0.0,0.0,0.0,0.0,0.0,0.0,0.0,1.0,0.0,0.0,0.0,0.0,0.0,0.0,0.0,0.0
MG: Oligoendopeptidase F, plasmid OS=Lactococcus lactis subsp. cremoris GN=pepF1 PE=1 SV=1 [P54124] Score: 64.7	UNKNOWN	3.4.24.-	0.0,0.0,0.0,0.0,0.0,0.0,0.0,0.0,0.0,0.0,0.0,0.0,1.0,0.0,0.0,0.0,0.0,0.0,0.0,0.0,0.0,0.0,0.0,0.0,0.0,0.0,0.0,0.0,0.0,0.0,0.0,0.0,0.0,0.0,0.0,0.0,0.0,0.0,0.0,1.0,0.0,0.0,0.0,0.0
RNB_PROMH Exoribonuclease 2 OS=Proteus mirabilis (strain HI4320) GN=rnb PE=3 SV=1	K01147	3.1.13.1	0.0,0.0,0.0,0.0,0.0,0.0,0.0,0.0,0.0,0.0,0.0,0.0,0.0,0.0,0.0,0.0,0.0,0.0,0.0,0.0,0.0,0.0,0.0,0.0,0.0,0.0,0.0,0.0,0.0,0.0,0.0,0.0,0.0,0.0,0.0,0.0,0.0,0.0,0.0,0.0,0.0,0.0,1.0,0.0
VIK1_YEAST Spindle pole body-associated protein VIK1 OS=Saccharomyces cerevisiae (strain ATCC 204508 / S288c) GN=VIK1 PE=1 SV=1	UNKNOWN	UNKNOWN	0.0,0.0,0.0,0.0,0.0,0.0,1.0,0.0,0.0,0.0,0.0,0.0,0.0,0.0,0.0,0.0,0.0,0.0,0.0,0.0,0.0,0.0,0.0,0.0,0.0,0.0,0.0,0.0,0.0,0.0,0.0,0.0,0.0,0.0,0.0,0.0,0.0,0.0,0.0,0.0,0.0,0.0,0.0,0.0
MG: Putative ribitolphosphotransferase OS=Bacillus subtilis subsp. spizizenii (strain ATCC 23059 / NRRL B-14472 / W23) GN=tarK PE=3 SV=2 [Q8RKJ1] Score: 225.0	UNKNOWN	2.7.8.-	1.0,0.0,1.0,0.0,0.0,0.0,0.0,0.0,0.0,0.0,0.0,0.0,0.0,0.0,0.0,0.0,0.0,0.0,0.0,0.0,0.0,0.0,0.0,0.0,0.0,0.0,0.0,0.0,0.0,0.0,0.0,0.0,0.0,0.0,0.0,0.0,0.0,0.0,0.0,0.0,0.0,0.0,1.0,0.0
MG: GTPase Era OS=Alkaliphilus oremlandii (strain OhILAs) GN=era PE=3 SV=1 [A8MG70] Score: 348.0	K03595	UNKNOWN	0.0,0.0,0.0,0.0,0.0,0.0,1.0,0.0,0.0,0.0,2.0,0.0,0.0,0.0,0.0,1.0,0.0,0.0,1.0,1.0,0.0,0.0,0.0,0.0,0.0,0.0,0.0,0.0,0.0,0.0,0.0,0.0,0.0,0.0,1.0,1.0,0.0,0.0,1.0,0.0,0.0,0.0,0.0,0.0
MG: Spermidine/putrescine import ATP-binding protein PotA OS=Desulfitobacterium hafniense (strain Y51) GN=potA PE=3 SV=2 [Q24XJ2] Score: 489.0	K11072	3.6.3.31	0.0,0.0,2.0,0.0,3.0,2.0,3.0,4.0,6.0,1.0,1.0,6.0,0.0,2.0,0.0,0.0,1.0,0.0,0.0,0.0,4.0,1.0,0.0,0.0,0.0,1.0,0.0,0.0,0.0,0.0,0.0,3.0,0.0,0.0,0.0,0.0,0.0,1.0,6.0,3.0,0.0,0.0,3.0,0.0
PT1_MYCPN Phosphoenolpyruvate-protein phosphotransferase OS=Mycoplasma pneumoniae (strain ATCC 29342 / M129) GN=ptsI PE=3 SV=1	K08483	2.7.3.9	0.0,0.0,0.0,0.0,0.0,0.0,0.0,1.0,0.0,0.0,0.0,0.0,0.0,0.0,0.0,0.0,0.0,0.0,0.0,0.0,0.0,0.0,0.0,0.0,0.0,0.0,0.0,0.0,0.0,0.0,0.0,0.0,0.0,0.0,0.0,0.0,0.0,0.0,0.0,0.0,0.0,0.0,0.0,0.0
THLA_STAES Probable acetyl-CoA acyltransferase OS=Staphylococcus epidermidis (strain ATCC 12228) GN=SE_2384 PE=3 SV=1	K00626	2.3.1.9	0.0,0.0,0.0,0.0,0.0,0.0,1.0,0.0,0.0,0.0,0.0,5.0,0.0,0.0,0.0,0.0,0.0,0.0,0.0,0.0,0.0,0.0,0.0,0.0,2.0,0.0,0.0,0.0,0.0,0.0,0.0,0.0,2.0,0.0,0.0,0.0,0.0,0.0,0.0,0.0,0.0,0.0,0.0,0.0
RS3_BORBU 30S ribosomal protein S3 OS=Borrelia burgdorferi (strain ATCC 35210 / B31 / CIP 102532 / DSM 4680) GN=rpsC PE=3 SV=2	K02982	UNKNOWN	15.0,19.0,7.0,7.0,8.0,0.0,1.0,1.0,0.0,0.0,0.0,0.0,2.0,4.0,2.0,1.0,2.0,2.0,0.0,0.0,0.0,0.0,0.0,0.0,7.0,7.0,9.0,11.0,1.0,0.0,0.0,3.0,0.0,0.0,10.0,4.0,0.0,0.0,3.0,0.0,0.0,0.0,0.0,0.0
MG: Putative carbohydrate transport ATP-binding protein MG119 OS=Mycoplasma genitalium (strain ATCC 33530 / G-37 / NCTC 10195) GN=MG119 PE=3 SV=1 [P47365] Score: 254.0	K02056	UNKNOWN	0.0,0.0,0.0,0.0,0.0,0.0,0.0,0.0,0.0,0.0,0.0,0.0,1.0,1.0,1.0,0.0,2.0,1.0,0.0,0.0,0.0,0.0,0.0,0.0,0.0,0.0,0.0,0.0,0.0,0.0,0.0,0.0,0.0,0.0,0.0,0.0,0.0,0.0,0.0,0.0,0.0,0.0,0.0,0.0
MG: 1-deoxy-D-xylulose 5-phosphate reductoisomerase OS=Pelotomaculum thermopropionicum (strain DSM 13744 / JCM 10971 / SI) GN=dxr PE=3 SV=1 [A5D2U3] Score: 406.0	K00099	1.1.1.267	0.0,0.0,0.0,0.0,0.0,0.0,0.0,0.0,0.0,0.0,0.0,0.0,0.0,0.0,0.0,0.0,0.0,0.0,0.0,0.0,0.0,0.0,0.0,0.0,0.0,0.0,0.0,0.0,0.0,0.0,0.0,0.0,0.0,0.0,0.0,0.0,1.0,0.0,0.0,0.0,0.0,0.0,0.0,0.0
MG: Glutamate synthase large subunit-like protein YerD OS=Bacillus subtilis (strain 168) GN=yerD PE=3 SV=1 [O34849] Score: 210.0	UNKNOWN	UNKNOWN	2.0,1.0,4.0,3.0,3.0,0.0,2.0,2.0,0.0,0.0,0.0,1.0,0.0,0.0,0.0,0.0,0.0,0.0,0.0,0.0,2.0,2.0,0.0,2.0,0.0,0.0,0.0,0.0,0.0,0.0,0.0,0.0,0.0,0.0,0.0,0.0,0.0,0.0,0.0,0.0,0.0,0.0,0.0,0.0
MG: Outer membrane efflux protein BepC OS=Brucella suis biovar 1 (strain 1330) GN=bepC PE=1 SV=1 [Q8G0Y6] Score: 54.7	K12340	UNKNOWN	0.0,0.0,0.0,0.0,0.0,0.0,0.0,0.0,0.0,0.0,0.0,0.0,1.0,2.0,4.0,1.0,0.0,4.0,2.0,0.0,0.0,0.0,0.0,0.0,0.0,0.0,0.0,0.0,0.0,0.0,0.0,0.0,0.0,0.0,0.0,0.0,0.0,0.0,0.0,0.0,0.0,0.0,0.0,1.0
NUOD1_STRM5 NADH-quinone oxidoreductase subunit D 1 OS=Stenotrophomonas maltophilia (strain R551-3) GN=nuoD1 PE=3 SV=1	K00333	1.6.5.11	0.0,0.0,0.0,0.0,0.0,0.0,0.0,0.0,0.0,0.0,0.0,0.0,0.0,0.0,0.0,0.0,0.0,1.0,0.0,0.0,0.0,0.0,0.0,0.0,0.0,0.0,0.0,0.0,0.0,0.0,0.0,0.0,0.0,0.0,0.0,0.0,0.0,0.0,0.0,0.0,1.0,11.0,1.0,12.0
MG: Uncharacterized ABC transporter ATP-binding protein YhaQ OS=Bacillus subtilis (strain 168) GN=yhaQ PE=3 SV=1 [C0SPB4] Score: 210.0	K01990	UNKNOWN	0.0,0.0,0.0,0.0,0.0,4.0,8.0,10.0,2.0,0.0,5.0,5.0,8.0,7.0,11.0,0.0,4.0,3.0,0.0,0.0,0.0,0.0,0.0,1.0,21.0,19.0,16.0,10.0,0.0,0.0,2.0,4.0,3.0,6.0,15.0,10.0,7.0,4.0,2.0,1.0,1.0,0.0,0.0,0.0
MG: Uncharacterized ABC transporter permease YvcS OS=Bacillus subtilis (strain 168) GN=yvcS PE=3 SV=1 [O06981] Score: 79.3	K02004	UNKNOWN	0.0,0.0,0.0,0.0,0.0,0.0,0.0,0.0,0.0,0.0,0.0,0.0,0.0,0.0,0.0,0.0,0.0,0.0,7.0,0.0,0.0,0.0,0.0,0.0,0.0,0.0,0.0,0.0,0.0,0.0,0.0,0.0,0.0,0.0,0.0,0.0,0.0,0.0,0.0,0.0,0.0,0.0,0.0,0.0
MG: Glycyl-glycine endopeptidase ALE-1 OS=Staphylococcus capitis PE=1 SV=1 [O05156] Score: 50.1	UNKNOWN	3.4.24.75	0.0,0.0,0.0,0.0,0.0,0.0,0.0,0.0,0.0,0.0,0.0,0.0,3.0,8.0,6.0,1.0,6.0,12.0,5.0,2.0,0.0,0.0,0.0,0.0,0.0,0.0,0.0,0.0,0.0,0.0,0.0,0.0,0.0,0.0,0.0,0.0,0.0,0.0,0.0,0.0,0.0,0.0,0.0,0.0
MG: Histidine triad nucleotide-binding protein OS=Entamoeba histolytica GN=EHI_093910 PE=1 SV=1 [C4LYI2] Score: 128.0	K02503	3.-.-.-	0.0,0.0,0.0,0.0,0.0,0.0,0.0,0.0,1.0,0.0,0.0,0.0,0.0,0.0,2.0,1.0,1.0,1.0,0.0,1.0,0.0,0.0,0.0,0.0,0.0,0.0,0.0,0.0,0.0,1.0,0.0,0.0,0.0,0.0,0.0,0.0,0.0,0.0,0.0,0.0,0.0,0.0,0.0,0.0
FB10_ARATH Putative F-box protein At1g19160 OS=Arabidopsis thaliana GN=At1g19160 PE=3 SV=1	UNKNOWN	UNKNOWN	0.0,0.0,0.0,0.0,0.0,0.0,0.0,0.0,0.0,0.0,0.0,0.0,1.0,0.0,0.0,0.0,0.0,0.0,0.0,0.0,0.0,0.0,0.0,0.0,0.0,0.0,0.0,0.0,0.0,0.0,0.0,0.0,0.0,0.0,0.0,0.0,0.0,0.0,0.0,0.0,0.0,0.0,0.0,0.0
MG: Pyruvate synthase subunit PorB OS=Methanosarcina barkeri (strain Fusaro / DSM 804) GN=porB PE=1 SV=3 [P80522] Score: 142.0	K00170	1.2.7.1	11.0,10.0,0.0,0.0,6.0,6.0,7.0,11.0,1.0,0.0,0.0,0.0,3.0,2.0,1.0,0.0,3.0,2.0,0.0,0.0,0.0,0.0,0.0,0.0,9.0,2.0,3.0,1.0,1.0,0.0,0.0,0.0,2.0,2.0,3.0,2.0,1.0,0.0,2.0,2.0,0.0,0.0,0.0,0.0
BOR3_ARATH Probable boron transporter 3 OS=Arabidopsis thaliana GN=BOR3 PE=1 SV=1	UNKNOWN	UNKNOWN	0.0,0.0,0.0,0.0,0.0,0.0,0.0,0.0,0.0,0.0,0.0,0.0,0.0,0.0,0.0,0.0,0.0,0.0,0.0,0.0,0.0,0.0,0.0,0.0,0.0,0.0,0.0,0.0,0.0,0.0,0.0,0.0,0.0,1.0,0.0,0.0,0.0,0.0,0.0,0.0,0.0,0.0,0.0,0.0
CUL9_HUMAN Cullin-9 OS=Homo sapiens GN=CUL9 PE=1 SV=2	K11970	UNKNOWN	0.0,0.0,0.0,0.0,0.0,0.0,0.0,0.0,0.0,0.0,0.0,0.0,0.0,0.0,0.0,0.0,0.0,0.0,0.0,0.0,0.0,0.0,0.0,0.0,0.0,0.0,0.0,0.0,0.0,0.0,1.0,0.0,0.0,0.0,0.0,0.0,0.0,0.0,0.0,0.0,0.0,0.0,0.0,0.0
CYF_CHLVU Apocytochrome f OS=Chlorella vulgaris GN=petA PE=3 SV=2	UNKNOWN	UNKNOWN	206.0,189.0,219.0,136.0,244.0,279.0,89.0,139.0,164.0,173.0,196.0,248.0,0.0,0.0,0.0,0.0,0.0,0.0,0.0,0.0,100.0,108.0,53.0,60.0,14.0,9.0,7.0,10.0,41.0,70.0,29.0,55.0,12.0,13.0,17.0,6.0,19.0,44.0,52.0,35.0,5.0,44.0,12.0,35.0
MG: Putative enoyl-CoA hydratase/isomerase YngF OS=Bacillus subtilis (strain 168) GN=yngF PE=3 SV=1 [O34893] Score: 158.0	UNKNOWN	UNKNOWN	0.0,0.0,0.0,0.0,0.0,0.0,0.0,0.0,0.0,0.0,0.0,0.0,0.0,0.0,0.0,0.0,0.0,0.0,0.0,0.0,0.0,0.0,0.0,0.0,0.0,0.0,0.0,0.0,0.0,0.0,0.0,0.0,0.0,0.0,0.0,0.0,0.0,0.0,1.0,0.0,0.0,0.0,0.0,0.0
MG: Putative murein lytic transglycosylase YjbJ OS=Bacillus subtilis (strain 168) GN=yjbJ PE=3 SV=1 [O31608] Score: 90.9	UNKNOWN	4.-.-.-	1.0,0.0,1.0,0.0,0.0,0.0,0.0,0.0,1.0,0.0,0.0,0.0,2.0,4.0,1.0,0.0,3.0,1.0,0.0,0.0,0.0,0.0,0.0,0.0,0.0,0.0,0.0,0.0,0.0,0.0,1.0,0.0,1.0,0.0,0.0,0.0,0.0,0.0,0.0,0.0,1.0,0.0,0.0,0.0
MG: Putative polysaccharide deacetylase YxkH OS=Bacillus subtilis (strain 168) GN=yxkH PE=3 SV=1 [P94361] Score: 62.4	UNKNOWN	3.-.-.-	0.0,0.0,0.0,0.0,3.0,5.0,6.0,10.0,0.0,0.0,0.0,0.0,0.0,0.0,0.0,0.0,0.0,0.0,0.0,0.0,0.0,0.0,0.0,0.0,0.0,0.0,0.0,0.0,0.0,0.0,0.0,0.0,0.0,0.0,0.0,0.0,0.0,0.0,0.0,0.0,0.0,0.0,0.0,0.0
L_LYCVA RNA-directed RNA polymerase L OS=Lymphocytic choriomeningitis virus (strain Armstrong) GN=L PE=1 SV=1	UNKNOWN	2.7.7.48	0.0,0.0,0.0,0.0,0.0,0.0,0.0,0.0,0.0,0.0,0.0,0.0,0.0,0.0,0.0,0.0,0.0,0.0,0.0,0.0,0.0,0.0,0.0,0.0,0.0,0.0,0.0,0.0,0.0,0.0,0.0,0.0,0.0,0.0,0.0,0.0,0.0,0.0,0.0,0.0,0.0,0.0,0.0,1.0
MG: Xyloglucan-specific endo-beta-1,4-glucanase BoGH9A OS=Bacteroides ovatus (strain ATCC 8483 / DSM 1896 / JCM 5824 / NCTC 11153) GN=BACOVA_02649 PE=1 SV=1 [A7LXT3] Score: 115.0	UNKNOWN	3.2.1.151	4.0,4.0,0.0,1.0,2.0,6.0,4.0,6.0,4.0,1.0,0.0,0.0,0.0,3.0,0.0,0.0,0.0,0.0,0.0,0.0,1.0,3.0,1.0,0.0,0.0,0.0,0.0,0.0,1.0,2.0,1.0,2.0,1.0,1.0,4.0,4.0,0.0,0.0,1.0,0.0,0.0,0.0,0.0,2.0
RL6_CHRVO 50S ribosomal protein L6 OS=Chromobacterium violaceum (strain ATCC 12472 / DSM 30191 / JCM 1249 / NBRC 12614 / NCIMB 9131 / NCTC 9757) GN=rplF PE=3 SV=1	K02933	UNKNOWN	0.0,0.0,0.0,0.0,0.0,0.0,0.0,0.0,0.0,0.0,0.0,0.0,0.0,0.0,0.0,0.0,0.0,0.0,0.0,0.0,0.0,0.0,0.0,0.0,0.0,0.0,0.0,0.0,0.0,0.0,0.0,0.0,0.0,0.0,0.0,0.0,0.0,0.0,0.0,0.0,0.0,0.0,7.0,0.0
MG: 50S ribosomal protein L27 OS=Streptococcus gordonii (strain Challis / ATCC 35105 / CH1 / DL1 / V288) GN=rpmA PE=3 SV=1 [A8AWF9] Score: 193.0	K02899	UNKNOWN	3.0,4.0,15.0,17.0,13.0,12.0,16.0,17.0,2.0,3.0,6.0,4.0,0.0,2.0,0.0,0.0,0.0,0.0,0.0,0.0,13.0,10.0,3.0,5.0,0.0,0.0,0.0,0.0,0.0,7.0,4.0,8.0,0.0,0.0,0.0,6.0,24.0,0.0,7.0,10.0,0.0,0.0,1.0,0.0
MG: Flagellum site-determining protein YlxH OS=Bacillus subtilis (strain 168) GN=ylxH PE=1 SV=1 [P40742] Score: 183.0	K04562	UNKNOWN	0.0,0.0,0.0,0.0,0.0,0.0,0.0,0.0,0.0,1.0,0.0,1.0,0.0,0.0,1.0,0.0,2.0,3.0,5.0,4.0,0.0,0.0,0.0,0.0,0.0,1.0,1.0,0.0,0.0,0.0,0.0,0.0,0.0,0.0,0.0,0.0,0.0,1.0,0.0,1.0,0.0,1.0,0.0,1.0
PPDK_RICBR Pyruvate, phosphate dikinase OS=Rickettsia bellii (strain RML369-C) GN=ppdK PE=3 SV=1	K01006	2.7.9.1	15.0,14.0,19.0,16.0,23.0,26.0,29.0,21.0,14.0,4.0,14.0,15.0,30.0,34.0,25.0,27.0,26.0,31.0,46.0,21.0,18.0,24.0,30.0,28.0,26.0,17.0,10.0,12.0,40.0,50.0,11.0,9.0,14.0,12.0,11.0,11.0,20.0,37.0,11.0,13.0,3.0,7.0,3.0,6.0
MLAC_SHIFL Probable phospholipid-binding protein MlaC OS=Shigella flexneri GN=mlaC PE=3 SV=1	K07323	UNKNOWN	0.0,0.0,0.0,0.0,0.0,0.0,0.0,0.0,0.0,0.0,0.0,0.0,0.0,0.0,0.0,0.0,0.0,0.0,0.0,0.0,0.0,0.0,0.0,0.0,0.0,0.0,0.0,0.0,0.0,0.0,0.0,0.0,0.0,0.0,0.0,0.0,0.0,0.0,0.0,0.0,0.0,0.0,2.0,0.0
YJQ9_YEAST Putative uncharacterized protein YJL169W OS=Saccharomyces cerevisiae (strain ATCC 204508 / S288c) GN=YJL169W PE=5 SV=1	UNKNOWN	UNKNOWN	0.0,0.0,0.0,0.0,0.0,0.0,0.0,0.0,0.0,0.0,0.0,0.0,0.0,0.0,0.0,0.0,0.0,0.0,0.0,0.0,0.0,0.0,0.0,0.0,0.0,0.0,0.0,0.0,0.0,0.0,0.0,0.0,0.0,0.0,0.0,0.0,0.0,0.0,0.0,0.0,0.0,0.0,0.0,1.0
MG: Phosphopentomutase OS=Moorella thermoacetica (strain ATCC 39073) GN=deoB PE=3 SV=1 [Q2RID0] Score: 503.0	K01839	5.4.2.7	0.0,0.0,0.0,0.0,0.0,0.0,0.0,0.0,0.0,0.0,0.0,0.0,0.0,0.0,0.0,0.0,0.0,0.0,0.0,0.0,0.0,0.0,0.0,0.0,1.0,0.0,0.0,0.0,0.0,0.0,0.0,0.0,0.0,0.0,0.0,0.0,0.0,0.0,0.0,0.0,0.0,0.0,0.0,0.0
TPP3_ORYSJ Probable trehalose-phosphate phosphatase 3 OS=Oryza sativa subsp. japonica GN=TPP3 PE=2 SV=1	K01087	3.1.3.12	0.0,0.0,0.0,1.0,0.0,0.0,0.0,0.0,0.0,0.0,0.0,0.0,0.0,0.0,0.0,0.0,0.0,0.0,0.0,0.0,0.0,0.0,0.0,0.0,0.0,0.0,0.0,0.0,0.0,0.0,0.0,0.0,0.0,0.0,0.0,0.0,0.0,0.0,0.0,0.0,0.0,0.0,0.0,0.0
GLGC_SALDC Glucose-1-phosphate adenylyltransferase OS=Salmonella dublin (strain CT_02021853) GN=glgC PE=3 SV=1	K00975	2.7.7.27	0.0,0.0,0.0,0.0,0.0,0.0,0.0,0.0,0.0,0.0,0.0,0.0,0.0,0.0,0.0,0.0,0.0,0.0,0.0,0.0,0.0,0.0,0.0,0.0,0.0,0.0,0.0,0.0,0.0,0.0,0.0,0.0,0.0,0.0,0.0,0.0,0.0,0.0,0.0,0.0,0.0,0.0,4.0,0.0
MG: Dihydroxy-acid dehydratase OS=Halothermothrix orenii (strain H 168 / OCM 544 / DSM 9562) GN=ilvD PE=3 SV=1 [B8CX17] Score: 212.0	K01687	4.2.1.9	0.0,0.0,0.0,0.0,0.0,0.0,0.0,0.0,0.0,0.0,0.0,0.0,14.0,18.0,12.0,7.0,21.0,13.0,8.0,5.0,0.0,0.0,0.0,0.0,0.0,0.0,0.0,0.0,1.0,0.0,0.0,0.0,0.0,0.0,0.0,0.0,0.0,0.0,0.0,0.0,0.0,0.0,0.0,0.0
MG: Thiosulfate reductase OS=Salmonella typhimurium (strain LT2 / SGSC1412 / ATCC 700720) GN=phsA PE=3 SV=2 [P37600] Score: 56.2	K08352	1.-.-.-	0.0,0.0,0.0,0.0,0.0,0.0,0.0,0.0,4.0,8.0,0.0,0.0,0.0,2.0,2.0,0.0,2.0,0.0,1.0,0.0,0.0,0.0,0.0,0.0,0.0,0.0,0.0,0.0,0.0,0.0,0.0,0.0,0.0,0.0,0.0,0.0,0.0,0.0,0.0,0.0,0.0,0.0,0.0,0.0
ZN423_DROME Zinc finger protein 423 homolog OS=Drosophila melanogaster GN=Oaz PE=2 SV=2	UNKNOWN	UNKNOWN	0.0,0.0,0.0,0.0,0.0,0.0,0.0,0.0,0.0,0.0,0.0,0.0,1.0,0.0,0.0,0.0,0.0,0.0,0.0,0.0,0.0,0.0,0.0,0.0,0.0,0.0,0.0,0.0,0.0,0.0,0.0,0.0,0.0,0.0,0.0,0.0,0.0,0.0,0.0,0.0,0.0,0.0,0.0,0.0
MG: Putative protease Do-like 3, mitochondrial OS=Arabidopsis thaliana GN=DEGP3 PE=3 SV=1 [Q9SHZ1] Score: 69.7	UNKNOWN	3.4.21.-	0.0,0.0,0.0,0.0,0.0,0.0,0.0,0.0,0.0,0.0,1.0,0.0,0.0,0.0,0.0,0.0,0.0,0.0,0.0,0.0,0.0,0.0,0.0,0.0,0.0,0.0,0.0,0.0,0.0,0.0,0.0,0.0,0.0,0.0,0.0,0.0,0.0,0.0,0.0,0.0,0.0,0.0,0.0,0.0
AN32C_MOUSE Putative acidic leucine-rich nuclear phosphoprotein 32 family member C OS=Mus musculus GN=Anp32c PE=2 SV=3	UNKNOWN	UNKNOWN	0.0,0.0,0.0,0.0,0.0,0.0,0.0,0.0,0.0,0.0,0.0,0.0,0.0,0.0,0.0,0.0,0.0,0.0,0.0,0.0,0.0,0.0,0.0,0.0,0.0,0.0,0.0,0.0,0.0,0.0,0.0,0.0,0.0,0.0,0.0,0.0,0.0,0.0,1.0,0.0,0.0,0.0,0.0,0.0
MG: Probable 2,3-bisphosphoglycerate-independent phosphoglycerate mutase OS=Leptospira interrogans serogroup Icterohaemorrhagiae serovar copenhageni (strain Fiocruz L1-130) GN=gpmI PE=3 SV=2 [Q72VB8] Score: 424.0	K15633	5.4.2.12	0.0,0.0,0.0,0.0,0.0,0.0,0.0,0.0,0.0,2.0,0.0,0.0,0.0,0.0,0.0,1.0,0.0,0.0,0.0,0.0,0.0,0.0,0.0,0.0,0.0,0.0,0.0,0.0,0.0,0.0,0.0,0.0,0.0,0.0,0.0,2.0,0.0,0.0,5.0,1.0,0.0,0.0,0.0,12.0
MG: Uncharacterized zinc protease y4wA OS=Rhizobium sp. (strain NGR234) GN=NGR_a01040 PE=3 SV=1 [P55679] Score: 78.6	K07263	3.4.24.-	47.0,26.0,53.0,17.0,29.0,37.0,117.0,108.0,26.0,21.0,39.0,32.0,18.0,29.0,24.0,18.0,16.0,29.0,17.0,21.0,10.0,17.0,18.0,14.0,0.0,2.0,0.0,1.0,4.0,7.0,1.0,0.0,5.0,6.0,17.0,13.0,2.0,3.0,2.0,1.0,0.0,10.0,0.0,1.0
MG: Methylated-DNA--protein-cysteine methyltransferase OS=Methanosarcina barkeri (strain Fusaro / DSM 804) GN=ogt PE=3 SV=1 [Q46EW4] Score: 281.0	K00567	2.1.1.63	0.0,0.0,0.0,0.0,4.0,2.0,0.0,0.0,0.0,0.0,0.0,0.0,0.0,0.0,0.0,0.0,0.0,0.0,0.0,0.0,0.0,1.0,0.0,0.0,7.0,4.0,4.0,5.0,0.0,0.0,0.0,0.0,0.0,0.0,0.0,0.0,0.0,0.0,0.0,0.0,0.0,0.0,0.0,0.0
TEX11_MOUSE Testis-expressed sequence 11 protein OS=Mus musculus GN=Tex11 PE=1 SV=1	UNKNOWN	UNKNOWN	0.0,0.0,0.0,0.0,0.0,0.0,0.0,0.0,0.0,0.0,0.0,0.0,0.0,0.0,0.0,0.0,0.0,0.0,0.0,0.0,0.0,0.0,0.0,0.0,0.0,0.0,0.0,0.0,0.0,0.0,1.0,0.0,0.0,0.0,0.0,0.0,0.0,0.0,0.0,0.0,0.0,0.0,0.0,0.0
ODP2_ECOLI Dihydrolipoyllysine-residue acetyltransferase component of pyruvate dehydrogenase complex OS=Escherichia coli (strain K12) GN=aceF PE=1 SV=3	K00627	2.3.1.12	0.0,0.0,0.0,0.0,0.0,0.0,0.0,0.0,0.0,0.0,0.0,0.0,0.0,0.0,0.0,0.0,0.0,0.0,0.0,0.0,0.0,0.0,0.0,0.0,0.0,0.0,0.0,0.0,0.0,0.0,0.0,0.0,0.0,0.0,0.0,0.0,0.0,0.0,0.0,0.0,0.0,0.0,14.0,0.0
MG: Phenylalanine--tRNA ligase alpha subunit OS=Clostridium thermocellum (strain ATCC 27405 / DSM 1237 / NBRC 103400 / NCIMB 10682 / NRRL B-4536 / VPI 7372) GN=pheS PE=3 SV=1 [A3DBX6] Score: 579.0	K01889	6.1.1.20	0.0,0.0,0.0,1.0,0.0,0.0,0.0,0.0,0.0,0.0,0.0,0.0,1.0,0.0,0.0,0.0,0.0,0.0,0.0,0.0,1.0,0.0,0.0,0.0,2.0,0.0,0.0,1.0,0.0,1.0,0.0,0.0,0.0,0.0,0.0,0.0,0.0,0.0,0.0,0.0,0.0,0.0,0.0,1.0
MG: Ribonuclease J2 OS=Bacillus subtilis (strain 168) GN=rnjB PE=1 SV=3 [O31760] Score: 342.0	K12574	3.1.-.-	0.0,0.0,0.0,0.0,0.0,0.0,0.0,0.0,0.0,0.0,0.0,0.0,0.0,0.0,1.0,0.0,0.0,0.0,0.0,0.0,0.0,0.0,0.0,0.0,0.0,0.0,0.0,0.0,0.0,0.0,0.0,0.0,0.0,0.0,0.0,0.0,0.0,0.0,0.0,0.0,0.0,0.0,0.0,0.0
MG: 50S ribosomal protein L14 OS=Clostridium cellulolyticum (strain ATCC 35319 / DSM 5812 / JCM 6584 / H10) GN=rplN PE=3 SV=1 [B8I7Y9] Score: 211.0	K02874	UNKNOWN	55.0,44.0,73.0,66.0,72.0,50.0,47.0,59.0,11.0,24.0,18.0,14.0,168.0,124.0,124.0,114.0,103.0,66.0,39.0,68.0,34.0,39.0,30.0,30.0,12.0,16.0,16.0,22.0,14.0,43.0,9.0,23.0,11.0,12.0,16.0,27.0,44.0,6.0,18.0,12.0,1.0,2.0,5.0,8.0
K1C3_XENLA Keratin, type I cytoskeletal 47 kDa (Fragment) OS=Xenopus laevis GN=xk81b1 PE=3 SV=2	UNKNOWN	UNKNOWN	31.0,28.0,45.0,86.0,46.0,30.0,40.0,78.0,50.0,58.0,94.0,87.0,53.0,50.0,32.0,11.0,30.0,28.0,7.0,14.0,68.0,55.0,113.0,35.0,98.0,76.0,48.0,115.0,150.0,174.0,94.0,100.0,88.0,122.0,152.0,137.0,128.0,144.0,27.0,29.0,63.0,49.0,72.0,27.0
MG: Phosphomannomutase OS=Escherichia coli (strain K12) GN=manB PE=3 SV=1 [P24175] Score: 212.0	K01840	5.4.2.8	0.0,0.0,0.0,0.0,0.0,0.0,0.0,0.0,0.0,0.0,0.0,0.0,0.0,1.0,0.0,0.0,0.0,0.0,2.0,0.0,0.0,0.0,0.0,0.0,0.0,0.0,0.0,0.0,0.0,0.0,0.0,0.0,0.0,0.0,0.0,0.0,0.0,0.0,0.0,0.0,0.0,0.0,0.0,0.0
MG: Glucose-1-phosphate adenylyltransferase OS=Pseudothermotoga lettingae (strain ATCC BAA-301 / DSM 14385 / NBRC 107922 / TMO) GN=glgC PE=3 SV=1 [A8F3W8] Score: 209.0	K00975	2.7.7.27	0.0,0.0,0.0,0.0,0.0,0.0,0.0,0.0,0.0,0.0,0.0,0.0,8.0,8.0,3.0,0.0,6.0,7.0,2.0,0.0,0.0,0.0,0.0,0.0,0.0,0.0,0.0,0.0,0.0,0.0,0.0,0.0,0.0,0.0,0.0,0.0,0.0,0.0,0.0,0.0,0.0,0.0,0.0,0.0
C2D1B_MOUSE Coiled-coil and C2 domain-containing protein 1B OS=Mus musculus GN=Cc2d1b PE=1 SV=1	K18260	UNKNOWN	0.0,0.0,0.0,0.0,0.0,0.0,0.0,0.0,0.0,0.0,0.0,0.0,0.0,0.0,0.0,0.0,0.0,0.0,0.0,1.0,0.0,0.0,0.0,0.0,0.0,0.0,0.0,0.0,0.0,0.0,0.0,0.0,0.0,0.0,0.0,0.0,0.0,0.0,0.0,0.0,0.0,0.0,0.0,0.0
MG: Energy-coupling factor transporter ATP-binding protein EcfA2 OS=Streptococcus mutans serotype c (strain ATCC 700610 / UA159) GN=ecfA2 PE=3 SV=1 [Q8DRS0] Score: 466.0	K16787	3.6.3.-	0.0,0.0,0.0,0.0,0.0,0.0,0.0,0.0,0.0,0.0,0.0,0.0,0.0,0.0,0.0,0.0,1.0,0.0,0.0,0.0,0.0,0.0,0.0,0.0,0.0,0.0,0.0,0.0,0.0,0.0,1.0,0.0,0.0,0.0,0.0,0.0,0.0,0.0,0.0,0.0,0.0,0.0,0.0,0.0
CAR10_ARATH Protein C2-DOMAIN ABA-RELATED 10 OS=Arabidopsis thaliana GN=CAR10 PE=2 SV=1	UNKNOWN	UNKNOWN	0.0,0.0,0.0,0.0,0.0,0.0,0.0,0.0,0.0,0.0,0.0,0.0,0.0,0.0,0.0,0.0,0.0,0.0,0.0,0.0,0.0,0.0,1.0,0.0,0.0,0.0,0.0,0.0,0.0,0.0,0.0,0.0,0.0,0.0,0.0,0.0,0.0,0.0,0.0,0.0,0.0,0.0,0.0,0.0
MG: Vacuolar-processing enzyme delta-isozyme OS=Arabidopsis thaliana GN=dVPE PE=1 SV=1 [Q9LJX8] Score: 132.0	K01369	3.4.22.34	0.0,0.0,0.0,0.0,0.0,0.0,2.0,0.0,0.0,0.0,0.0,0.0,0.0,0.0,0.0,0.0,0.0,0.0,0.0,0.0,0.0,0.0,0.0,0.0,0.0,0.0,0.0,0.0,0.0,0.0,0.0,0.0,0.0,0.0,0.0,0.0,0.0,0.0,0.0,0.0,0.0,0.0,0.0,0.0
MG: Malonyl-[acyl-carrier protein] O-methyltransferase OS=Methylovorus sp. (strain MP688) GN=bioC PE=3 SV=1 [E4QJB8] Score: 101.0	K02169	2.1.1.197	0.0,1.0,0.0,0.0,0.0,0.0,0.0,0.0,0.0,0.0,0.0,0.0,0.0,0.0,0.0,0.0,0.0,0.0,0.0,0.0,0.0,0.0,0.0,0.0,0.0,0.0,0.0,0.0,0.0,0.0,0.0,0.0,0.0,0.0,0.0,0.0,0.0,0.0,0.0,0.0,0.0,0.0,0.0,0.0
UBIQP_XENLA Polyubiquitin (Fragment) OS=Xenopus laevis PE=1 SV=2	UNKNOWN	UNKNOWN	0.0,0.0,0.0,0.0,0.0,0.0,1.0,1.0,4.0,1.0,6.0,4.0,0.0,1.0,1.0,0.0,2.0,1.0,0.0,0.0,0.0,3.0,0.0,2.0,0.0,0.0,0.0,4.0,1.0,0.0,2.0,0.0,1.0,0.0,3.0,3.0,2.0,2.0,1.0,1.0,0.0,0.0,0.0,0.0
MG: Phosphoglucosamine mutase OS=Thermosipho africanus (strain TCF52B) GN=glmM PE=3 SV=1 [B7IDU4] Score: 382.0	K03431	5.4.2.10	0.0,0.0,0.0,0.0,0.0,0.0,0.0,0.0,0.0,0.0,0.0,0.0,3.0,2.0,0.0,0.0,0.0,2.0,0.0,0.0,0.0,0.0,0.0,0.0,0.0,0.0,0.0,0.0,0.0,0.0,0.0,0.0,0.0,0.0,0.0,0.0,0.0,0.0,0.0,0.0,0.0,0.0,0.0,0.0
MNME_DESPS tRNA modification GTPase MnmE OS=Desulfotalea psychrophila (strain LSv54 / DSM 12343) GN=mnmE PE=3 SV=2	K03650	3.6.-.-	0.0,0.0,0.0,0.0,0.0,1.0,0.0,0.0,0.0,0.0,0.0,0.0,0.0,0.0,0.0,0.0,0.0,0.0,0.0,0.0,0.0,0.0,0.0,0.0,0.0,0.0,0.0,0.0,0.0,0.0,0.0,0.0,0.0,0.0,0.0,0.0,0.0,0.0,0.0,0.0,0.0,0.0,0.0,0.0
MG: Probable lipid kinase YegS-like OS=Chromohalobacter salexigens (strain DSM 3043 / ATCC BAA-138 / NCIMB 13768) GN=Csal_2507 PE=3 SV=1 [Q1QUK4] Score: 99.0	UNKNOWN	2.7.1.-	0.0,0.0,0.0,0.0,0.0,0.0,0.0,0.0,0.0,0.0,0.0,0.0,0.0,0.0,0.0,0.0,0.0,0.0,1.0,0.0,0.0,0.0,0.0,0.0,0.0,0.0,0.0,0.0,0.0,0.0,0.0,0.0,0.0,0.0,0.0,0.0,0.0,0.0,0.0,0.0,0.0,0.0,0.0,0.0
MG: 4-diphosphocytidyl-2-C-methyl-D-erythritol kinase OS=Parabacteroides distasonis (strain ATCC 8503 / DSM 20701 / NCTC 11152) GN=ispE PE=3 SV=1 [A6L9X1] Score: 275.0	K00919	2.7.1.148	0.0,0.0,0.0,0.0,0.0,0.0,0.0,0.0,0.0,0.0,0.0,0.0,0.0,0.0,0.0,0.0,0.0,0.0,0.0,0.0,0.0,0.0,0.0,0.0,0.0,0.0,0.0,0.0,0.0,0.0,0.0,0.0,1.0,0.0,0.0,0.0,0.0,0.0,0.0,0.0,0.0,0.0,0.0,0.0
MG: UPF0261 protein CTC_01794 OS=Clostridium tetani (strain Massachusetts / E88) GN=CTC_01794 PE=3 SV=2 [Q893M2] Score: 294.0	UNKNOWN	UNKNOWN	0.0,0.0,0.0,0.0,0.0,0.0,0.0,0.0,0.0,0.0,0.0,0.0,0.0,0.0,0.0,0.0,0.0,1.0,0.0,0.0,0.0,0.0,0.0,0.0,0.0,0.0,0.0,0.0,0.0,0.0,0.0,0.0,0.0,0.0,0.0,0.0,0.0,0.0,0.0,0.0,0.0,2.0,0.0,0.0
MG: Uncharacterized protein Mbar_A1602 OS=Methanosarcina barkeri (strain Fusaro / DSM 804) GN=Mbar_A1602 PE=3 SV=2 [P96800] Score: 152.0	UNKNOWN	UNKNOWN	0.0,0.0,0.0,0.0,0.0,0.0,0.0,0.0,1.0,0.0,0.0,0.0,0.0,0.0,0.0,0.0,0.0,0.0,0.0,0.0,0.0,0.0,0.0,0.0,0.0,0.0,0.0,0.0,0.0,0.0,0.0,0.0,0.0,0.0,0.0,0.0,0.0,0.0,0.0,0.0,0.0,0.0,0.0,0.0
MG: 50S ribosomal protein L19 OS=Staphylococcus aureus (strain JH9) GN=rplS PE=3 SV=1 [A5ISC6] Score: 172.0	K02884	UNKNOWN	3.0,4.0,2.0,4.0,0.0,0.0,0.0,0.0,0.0,0.0,0.0,0.0,0.0,0.0,1.0,0.0,0.0,0.0,0.0,0.0,0.0,0.0,0.0,0.0,0.0,0.0,0.0,0.0,0.0,0.0,0.0,0.0,0.0,0.0,0.0,0.0,0.0,0.0,0.0,0.0,0.0,0.0,0.0,0.0
YUAO_ECOLI Uncharacterized protein YuaO OS=Escherichia coli (strain K12) GN=yuaO PE=3 SV=1	K12678	UNKNOWN	0.0,0.0,0.0,1.0,0.0,0.0,0.0,0.0,0.0,0.0,0.0,0.0,0.0,0.0,0.0,0.0,0.0,0.0,0.0,0.0,0.0,0.0,0.0,0.0,0.0,0.0,0.0,0.0,0.0,0.0,0.0,0.0,0.0,0.0,0.0,0.0,0.0,0.0,0.0,0.0,0.0,0.0,0.0,0.0
YMF19_WHEAT Putative ATP synthase protein YMF19 OS=Triticum aestivum GN=YMF19 PE=2 SV=1	UNKNOWN	3.6.3.14	0.0,0.0,0.0,0.0,0.0,2.0,0.0,0.0,0.0,0.0,0.0,0.0,0.0,0.0,0.0,0.0,0.0,0.0,0.0,0.0,0.0,0.0,0.0,0.0,0.0,0.0,0.0,0.0,0.0,0.0,0.0,0.0,0.0,0.0,0.0,0.0,0.0,0.0,0.0,4.0,0.0,0.0,0.0,2.0
MG: L-cystine-binding protein TcyA OS=Bacillus subtilis (strain 168) GN=tcyA PE=1 SV=3 [P42199] Score: 89.7	K02424	UNKNOWN	0.0,0.0,0.0,0.0,0.0,0.0,0.0,0.0,0.0,0.0,0.0,0.0,0.0,2.0,0.0,0.0,0.0,0.0,0.0,0.0,0.0,0.0,0.0,0.0,0.0,0.0,0.0,0.0,0.0,0.0,0.0,0.0,0.0,0.0,0.0,0.0,0.0,0.0,0.0,0.0,0.0,0.0,0.0,0.0
MG: Overcoming lysogenization defect protein OS=Enterobacteria phage P2 GN=old PE=4 SV=2 [P13520] Score: 61.6	UNKNOWN	UNKNOWN	0.0,0.0,0.0,0.0,0.0,0.0,1.0,0.0,0.0,0.0,0.0,0.0,0.0,0.0,0.0,0.0,0.0,0.0,0.0,0.0,0.0,0.0,0.0,0.0,0.0,0.0,0.0,0.0,0.0,0.0,0.0,1.0,0.0,0.0,0.0,0.0,0.0,0.0,0.0,0.0,0.0,0.0,0.0,0.0
GPMA_METI4 2,3-bisphosphoglycerate-dependent phosphoglycerate mutase OS=Methylacidiphilum infernorum (isolate V4) GN=gpmA PE=3 SV=1	K01834	5.4.2.11	2.0,1.0,17.0,15.0,0.0,0.0,0.0,0.0,1.0,1.0,4.0,2.0,0.0,0.0,0.0,0.0,0.0,0.0,0.0,0.0,9.0,11.0,9.0,9.0,0.0,0.0,0.0,0.0,3.0,0.0,0.0,0.0,0.0,0.0,0.0,0.0,0.0,2.0,16.0,9.0,0.0,0.0,0.0,1.0
SERC_SHESR Phosphoserine aminotransferase OS=Shewanella sp. (strain MR-7) GN=serC PE=3 SV=1	K00831	2.6.1.52	4.0,2.0,0.0,6.0,1.0,2.0,3.0,4.0,2.0,3.0,2.0,5.0,6.0,6.0,8.0,6.0,6.0,8.0,5.0,6.0,6.0,3.0,4.0,2.0,15.0,4.0,6.0,4.0,3.0,2.0,3.0,5.0,8.0,9.0,13.0,12.0,3.0,4.0,1.0,1.0,0.0,0.0,5.0,1.0
MG: Molybdopterin adenylyltransferase OS=Helicobacter pylori (strain J99 / ATCC 700824) GN=mog PE=1 SV=1 [Q9ZL45] Score: 132.0	K03831	2.7.7.75	0.0,0.0,1.0,0.0,0.0,0.0,0.0,0.0,0.0,0.0,0.0,0.0,8.0,4.0,8.0,9.0,12.0,3.0,0.0,1.0,0.0,0.0,0.0,0.0,0.0,0.0,0.0,0.0,0.0,0.0,0.0,0.0,0.0,0.0,0.0,0.0,0.0,0.0,0.0,0.0,0.0,0.0,0.0,0.0
DRL10_ARATH Probable disease resistance protein RF45 OS=Arabidopsis thaliana GN=RF45 PE=1 SV=1	UNKNOWN	UNKNOWN	0.0,0.0,0.0,0.0,0.0,0.0,0.0,0.0,0.0,0.0,0.0,0.0,0.0,0.0,0.0,0.0,0.0,0.0,0.0,0.0,0.0,0.0,0.0,0.0,0.0,0.0,0.0,0.0,0.0,0.0,0.0,0.0,0.0,0.0,1.0,0.0,0.0,0.0,0.0,0.0,0.0,0.0,0.0,0.0
KPYA_RICCO Pyruvate kinase isozyme A, chloroplastic OS=Ricinus communis PE=1 SV=1	K00873	2.7.1.40	0.0,0.0,0.0,0.0,0.0,0.0,0.0,0.0,0.0,0.0,0.0,0.0,0.0,0.0,0.0,1.0,0.0,0.0,0.0,0.0,0.0,0.0,0.0,0.0,0.0,0.0,0.0,0.0,0.0,0.0,0.0,0.0,0.0,0.0,0.0,0.0,0.0,0.0,0.0,0.0,0.0,0.0,0.0,0.0
MG: 5'-deoxyadenosine deaminase OS=Methanoregula boonei (strain 6A8) GN=dadD PE=3 SV=1 [A7I6C5] Score: 576.0	K12960	3.5.4.41	0.0,0.0,0.0,0.0,0.0,0.0,0.0,0.0,0.0,0.0,0.0,1.0,0.0,0.0,0.0,0.0,0.0,0.0,0.0,0.0,0.0,0.0,0.0,0.0,0.0,0.0,0.0,0.0,1.0,0.0,0.0,0.0,0.0,0.0,0.0,0.0,0.0,0.0,0.0,0.0,0.0,0.0,0.0,0.0
MG: tRNA modification GTPase MnmE OS=Clostridium novyi (strain NT) GN=mnmE PE=3 SV=1 [A0PX77] Score: 370.0	K03650	3.6.-.-	0.0,0.0,1.0,0.0,0.0,0.0,0.0,1.0,1.0,0.0,1.0,1.0,0.0,0.0,0.0,0.0,1.0,0.0,0.0,0.0,0.0,0.0,0.0,0.0,0.0,0.0,0.0,0.0,0.0,1.0,0.0,0.0,0.0,0.0,0.0,1.0,0.0,0.0,0.0,0.0,0.0,0.0,0.0,0.0
PKP1_MOUSE Plakophilin-1 OS=Mus musculus GN=Pkp1 PE=1 SV=1	K10387	UNKNOWN	0.0,0.0,0.0,0.0,0.0,0.0,0.0,0.0,0.0,0.0,0.0,0.0,0.0,0.0,0.0,0.0,0.0,0.0,0.0,0.0,0.0,0.0,0.0,0.0,0.0,0.0,0.0,0.0,0.0,0.0,2.0,0.0,0.0,0.0,0.0,0.0,0.0,0.0,0.0,2.0,5.0,0.0,4.0,0.0
KTHY_NATPD Probable thymidylate kinase OS=Natronomonas pharaonis (strain ATCC 35678 / DSM 2160) GN=tmk PE=3 SV=1	K00943	2.7.4.9	0.0,0.0,0.0,0.0,0.0,0.0,0.0,0.0,1.0,0.0,0.0,0.0,0.0,1.0,0.0,1.0,0.0,1.0,0.0,0.0,0.0,0.0,0.0,0.0,0.0,0.0,0.0,0.0,0.0,0.0,0.0,0.0,0.0,0.0,0.0,0.0,0.0,0.0,0.0,0.0,0.0,0.0,0.0,0.0
PRDX2_HUMAN Peroxiredoxin-2 OS=Homo sapiens GN=PRDX2 PE=1 SV=5	K03386	1.11.1.15	0.0,0.0,0.0,0.0,0.0,0.0,0.0,0.0,0.0,0.0,1.0,0.0,0.0,0.0,0.0,0.0,0.0,0.0,0.0,0.0,0.0,0.0,0.0,0.0,0.0,0.0,0.0,0.0,0.0,0.0,0.0,0.0,0.0,0.0,0.0,0.0,0.0,1.0,0.0,0.0,0.0,1.0,0.0,0.0
MG: Pyruvate synthase OS=Desulfovibrio africanus GN=por PE=1 SV=1 [P94692] Score: 439.0	UNKNOWN	1.2.7.1	35.0,34.0,21.0,14.0,15.0,14.0,59.0,61.0,77.0,71.0,49.0,78.0,169.0,85.0,216.0,45.0,192.0,331.0,35.0,247.0,11.0,12.0,26.0,25.0,72.0,77.0,89.0,61.0,22.0,12.0,18.0,13.0,29.0,32.0,40.0,56.0,21.0,14.0,22.0,20.0,0.0,0.0,1.0,8.0
MG: Uncharacterized oxidoreductase TM_0019 OS=Thermotoga maritima (strain ATCC 43589 / MSB8 / DSM 3109 / JCM 10099) GN=TM_0019 PE=3 SV=2 [Q56318] Score: 190.0	UNKNOWN	1.-.-.-	0.0,0.0,0.0,0.0,0.0,0.0,0.0,0.0,1.0,0.0,1.0,0.0,5.0,2.0,2.0,0.0,7.0,4.0,0.0,0.0,0.0,0.0,0.0,0.0,0.0,0.0,0.0,0.0,0.0,0.0,0.0,0.0,2.0,2.0,1.0,0.0,0.0,0.0,0.0,0.0,0.0,0.0,1.0,0.0
RSMG_CORJK Ribosomal RNA small subunit methyltransferase G OS=Corynebacterium jeikeium (strain K411) GN=rsmG PE=3 SV=1	K03501	2.1.1.-	0.0,0.0,0.0,0.0,0.0,0.0,0.0,0.0,0.0,0.0,0.0,0.0,0.0,0.0,0.0,0.0,0.0,0.0,0.0,0.0,0.0,0.0,0.0,0.0,0.0,0.0,0.0,0.0,0.0,0.0,0.0,0.0,0.0,1.0,0.0,0.0,0.0,0.0,0.0,0.0,0.0,0.0,0.0,0.0
STGL2_ARATH Stigma-specific STIG1-like protein 2 OS=Arabidopsis thaliana GN=At5g55110 PE=3 SV=1	UNKNOWN	UNKNOWN	0.0,0.0,0.0,0.0,0.0,0.0,0.0,0.0,1.0,0.0,0.0,0.0,0.0,0.0,0.0,0.0,0.0,0.0,0.0,0.0,0.0,0.0,0.0,0.0,0.0,0.0,0.0,0.0,0.0,0.0,0.0,0.0,0.0,0.0,0.0,0.0,0.0,0.0,0.0,0.0,0.0,0.0,0.0,0.0
MG: Protein CapJ OS=Staphylococcus aureus GN=capJ PE=4 SV=1 [P39859] Score: 203.0	UNKNOWN	UNKNOWN	0.0,0.0,0.0,0.0,0.0,0.0,0.0,0.0,0.0,1.0,0.0,0.0,0.0,0.0,1.0,0.0,0.0,1.0,0.0,0.0,0.0,0.0,0.0,0.0,0.0,0.0,0.0,0.0,0.0,0.0,0.0,0.0,0.0,0.0,0.0,0.0,0.0,0.0,0.0,1.0,0.0,1.0,0.0,0.0
MG: S-layer protein OS=Thermus thermophilus (strain HB8 / ATCC 27634 / DSM 579) GN=slpA PE=3 SV=1 [Q5SH37] Score: 89.0	UNKNOWN	UNKNOWN	402.0,332.0,340.0,143.0,575.0,894.0,915.0,840.0,1052.0,793.0,1141.0,1431.0,2766.0,1803.0,2393.0,1842.0,2138.0,2098.0,2377.0,1973.0,608.0,793.0,655.0,656.0,982.0,1049.0,751.0,668.0,575.0,539.0,346.0,342.0,679.0,589.0,587.0,533.0,416.0,672.0,421.0,865.0,173.0,727.0,158.0,999.0
PRP5_CHAGB Pre-mRNA-processing ATP-dependent RNA helicase PRP5 OS=Chaetomium globosum (strain ATCC 6205 / CBS 148.51 / DSM 1962 / NBRC 6347 / NRRL 1970) GN=PRP5 PE=3 SV=1	UNKNOWN	3.6.4.13	0.0,0.0,0.0,0.0,0.0,0.0,0.0,0.0,0.0,0.0,0.0,0.0,0.0,0.0,0.0,0.0,0.0,0.0,0.0,0.0,0.0,0.0,0.0,2.0,0.0,0.0,0.0,0.0,1.0,0.0,0.0,0.0,0.0,0.0,0.0,0.0,0.0,0.0,0.0,0.0,0.0,0.0,0.0,0.0
RS3_LACLS 30S ribosomal protein S3 OS=Lactococcus lactis subsp. cremoris (strain SK11) GN=rpsC PE=3 SV=1	K02982	UNKNOWN	31.0,27.0,46.0,25.0,8.0,0.0,1.0,1.0,0.0,0.0,0.0,0.0,2.0,4.0,2.0,1.0,2.0,2.0,0.0,0.0,2.0,0.0,0.0,1.0,7.0,7.0,9.0,11.0,1.0,0.0,0.0,3.0,0.0,0.0,10.0,4.0,2.0,2.0,13.0,2.0,0.0,0.0,0.0,0.0
KDM7A_MOUSE Lysine-specific demethylase 7A OS=Mus musculus GN=Kdm7a PE=2 SV=2	K11445	1.14.11.-	0.0,0.0,0.0,0.0,0.0,0.0,0.0,0.0,0.0,0.0,0.0,0.0,0.0,0.0,0.0,0.0,0.0,0.0,0.0,0.0,0.0,0.0,0.0,0.0,0.0,0.0,0.0,0.0,0.0,0.0,0.0,0.0,0.0,0.0,0.0,0.0,1.0,0.0,0.0,0.0,0.0,0.0,0.0,0.0
CIP2A_MOUSE Protein CIP2A OS=Mus musculus GN=Kiaa1524 PE=1 SV=3	UNKNOWN	UNKNOWN	0.0,0.0,0.0,0.0,0.0,0.0,0.0,0.0,0.0,0.0,0.0,0.0,0.0,0.0,0.0,0.0,0.0,0.0,0.0,0.0,0.0,0.0,0.0,0.0,0.0,0.0,0.0,0.0,0.0,0.0,0.0,0.0,0.0,0.0,0.0,0.0,0.0,0.0,0.0,0.0,0.0,3.0,0.0,0.0
MAOC_MAIZE NADP-dependent malic enzyme, chloroplastic OS=Zea mays GN=MOD1 PE=1 SV=1	K00029	1.1.1.40	0.0,0.0,5.0,5.0,0.0,0.0,0.0,0.0,0.0,0.0,0.0,0.0,0.0,0.0,0.0,0.0,0.0,0.0,0.0,0.0,0.0,0.0,0.0,0.0,0.0,0.0,0.0,0.0,0.0,0.0,0.0,0.0,0.0,0.0,0.0,0.0,0.0,0.0,2.0,3.0,0.0,0.0,0.0,0.0
MG: DNA translocase FtsK OS=Chlorobium tepidum (strain ATCC 49652 / DSM 12025 / NBRC 103806 / TLS) GN=ftsK PE=3 SV=1 [Q8KBK0] Score: 400.0	K03466	UNKNOWN	0.0,0.0,0.0,0.0,0.0,0.0,0.0,0.0,1.0,0.0,0.0,0.0,0.0,0.0,0.0,0.0,0.0,0.0,3.0,0.0,0.0,0.0,0.0,0.0,0.0,0.0,0.0,0.0,0.0,0.0,0.0,0.0,0.0,0.0,0.0,0.0,0.0,0.0,0.0,0.0,0.0,0.0,0.0,0.0
CASC5_MOUSE Protein CASC5 OS=Mus musculus GN=Casc5 PE=1 SV=3	UNKNOWN	UNKNOWN	0.0,0.0,0.0,0.0,0.0,0.0,0.0,0.0,0.0,0.0,0.0,0.0,0.0,0.0,0.0,0.0,0.0,0.0,0.0,0.0,0.0,0.0,0.0,0.0,0.0,0.0,0.0,0.0,0.0,0.0,0.0,0.0,0.0,1.0,0.0,0.0,0.0,0.0,0.0,0.0,0.0,0.0,0.0,0.0
MG: Tyrosine recombinase XerC OS=Serratia marcescens GN=xerC PE=3 SV=1 [O31087] Score: 76.6	UNKNOWN	UNKNOWN	0.0,0.0,0.0,0.0,0.0,0.0,0.0,0.0,0.0,0.0,0.0,0.0,0.0,0.0,0.0,0.0,0.0,0.0,0.0,0.0,0.0,0.0,0.0,0.0,0.0,0.0,0.0,0.0,0.0,0.0,1.0,0.0,0.0,0.0,0.0,0.0,0.0,0.0,0.0,0.0,0.0,0.0,0.0,0.0
MG: Glycerol-3-phosphate dehydrogenase, mitochondrial OS=Homo sapiens GN=GPD2 PE=1 SV=3 [P43304] Score: 375.0	K00111	1.1.5.3	0.0,0.0,0.0,0.0,0.0,0.0,0.0,0.0,0.0,0.0,0.0,0.0,0.0,0.0,1.0,0.0,0.0,1.0,0.0,0.0,0.0,0.0,0.0,0.0,0.0,0.0,0.0,0.0,0.0,0.0,0.0,0.0,0.0,0.0,0.0,0.0,0.0,0.0,0.0,0.0,0.0,0.0,0.0,0.0
SYFB_BARHE Phenylalanine--tRNA ligase beta subunit OS=Bartonella henselae (strain ATCC 49882 / DSM 28221 / Houston 1) GN=pheT PE=3 SV=1	K01890	6.1.1.20	0.0,0.0,0.0,0.0,0.0,0.0,0.0,0.0,0.0,0.0,0.0,0.0,0.0,0.0,0.0,0.0,0.0,0.0,0.0,1.0,0.0,0.0,0.0,0.0,0.0,0.0,0.0,0.0,0.0,0.0,0.0,0.0,0.0,0.0,0.0,0.0,0.0,0.0,0.0,0.0,0.0,0.0,0.0,0.0
PYRR_STRS2 Bifunctional protein PyrR OS=Streptococcus suis (strain 98HAH33) GN=pyrR PE=3 SV=1	K02825	2.4.2.9	4.0,0.0,5.0,0.0,2.0,0.0,0.0,0.0,1.0,0.0,0.0,0.0,0.0,0.0,0.0,0.0,0.0,1.0,0.0,0.0,0.0,0.0,0.0,0.0,0.0,0.0,0.0,0.0,0.0,0.0,0.0,1.0,0.0,2.0,0.0,0.0,0.0,0.0,1.0,5.0,0.0,0.0,0.0,0.0
MG: Uncharacterized protein Cbei_0202 OS=Clostridium beijerinckii (strain ATCC 51743 / NCIMB 8052) GN=Cbei_0202 PE=4 SV=2 [Q05627] Score: 335.0	K07137	UNKNOWN	0.0,0.0,0.0,0.0,2.0,0.0,0.0,0.0,0.0,0.0,0.0,0.0,0.0,0.0,0.0,0.0,0.0,0.0,3.0,1.0,0.0,0.0,0.0,0.0,0.0,1.0,0.0,0.0,0.0,0.0,0.0,0.0,0.0,0.0,0.0,0.0,1.0,0.0,0.0,0.0,0.0,0.0,0.0,0.0
MG: Phosphoribosylglycinamide formyltransferase, chloroplastic OS=Arabidopsis thaliana GN=PUR3 PE=2 SV=2 [P52422] Score: 142.0	K00601	2.1.2.2	0.0,0.0,0.0,0.0,0.0,0.0,0.0,0.0,0.0,0.0,0.0,0.0,0.0,0.0,0.0,0.0,0.0,0.0,0.0,0.0,0.0,0.0,0.0,1.0,0.0,0.0,0.0,0.0,0.0,1.0,0.0,0.0,0.0,1.0,0.0,0.0,0.0,0.0,0.0,0.0,0.0,0.0,0.0,0.0
MCFP_DICDI Mitochondrial substrate carrier family protein P OS=Dictyostelium discoideum GN=mcfP PE=3 SV=1	K15084	UNKNOWN	1.0,4.0,1.0,1.0,1.0,4.0,0.0,2.0,4.0,3.0,4.0,4.0,10.0,3.0,4.0,4.0,6.0,3.0,4.0,3.0,1.0,0.0,3.0,0.0,1.0,1.0,2.0,2.0,2.0,0.0,2.0,2.0,2.0,3.0,5.0,5.0,2.0,3.0,0.0,0.0,0.0,0.0,0.0,0.0
MG: Dihydroorotase OS=Methanosphaera stadtmanae (strain ATCC 43021 / DSM 3091 / JCM 11832 / MCB-3) GN=pyrC PE=3 SV=1 [Q2NHZ6] Score: 134.0	K01465	3.5.2.3	0.0,0.0,0.0,0.0,0.0,0.0,0.0,0.0,0.0,0.0,0.0,0.0,0.0,0.0,1.0,0.0,0.0,0.0,0.0,0.0,0.0,0.0,0.0,0.0,0.0,0.0,0.0,0.0,0.0,0.0,0.0,0.0,0.0,0.0,0.0,0.0,0.0,0.0,0.0,0.0,0.0,0.0,0.0,0.0
MG: Proline--tRNA ligase 2 OS=Bacillus anthracis GN=proS2 PE=3 SV=1 [Q81Z76] Score: 638.0	K01881	6.1.1.15	0.0,0.0,0.0,0.0,0.0,0.0,0.0,0.0,0.0,0.0,0.0,1.0,0.0,0.0,0.0,0.0,0.0,0.0,0.0,0.0,0.0,0.0,0.0,0.0,0.0,0.0,0.0,0.0,0.0,0.0,0.0,0.0,0.0,0.0,0.0,0.0,0.0,0.0,0.0,0.0,0.0,2.0,0.0,0.0
TRYM_CANFA Mastin OS=Canis familiaris PE=1 SV=2	UNKNOWN	3.4.21.-	0.0,0.0,0.0,0.0,0.0,0.0,0.0,0.0,0.0,0.0,0.0,0.0,0.0,0.0,0.0,0.0,0.0,0.0,0.0,0.0,0.0,0.0,0.0,0.0,0.0,0.0,0.0,0.0,0.0,1.0,0.0,0.0,0.0,0.0,0.0,0.0,0.0,0.0,0.0,0.0,0.0,0.0,0.0,0.0
MG: Uncharacterized transporter AF_1552 OS=Archaeoglobus fulgidus (strain ATCC 49558 / VC-16 / DSM 4304 / JCM 9628 / NBRC 100126) GN=AF_1552 PE=3 SV=1 [O28720] Score: 91.3	UNKNOWN	UNKNOWN	0.0,0.0,0.0,0.0,0.0,0.0,0.0,0.0,0.0,0.0,0.0,0.0,0.0,0.0,0.0,0.0,0.0,0.0,0.0,0.0,0.0,0.0,0.0,0.0,0.0,1.0,0.0,0.0,0.0,0.0,0.0,0.0,0.0,0.0,0.0,0.0,0.0,0.0,0.0,0.0,0.0,0.0,0.0,0.0
MG: Mini-circle putative transposase for IS117 OS=Streptomyces coelicolor (strain ATCC BAA-471 / A3(2) / M145) GN=SCO1603 PE=4 SV=1 [P14707] Score: 119.0	UNKNOWN	UNKNOWN	0.0,0.0,0.0,0.0,0.0,0.0,0.0,0.0,0.0,0.0,0.0,0.0,3.0,0.0,0.0,0.0,0.0,0.0,0.0,0.0,0.0,0.0,0.0,0.0,0.0,0.0,0.0,0.0,0.0,0.0,0.0,0.0,0.0,0.0,0.0,0.0,0.0,0.0,0.0,0.0,0.0,0.0,0.0,0.0
MG: UDP-3-O-acylglucosamine N-acyltransferase OS=Geobacter sp. (strain M21) GN=lpxD PE=3 SV=1 [C6E5B9] Score: 308.0	K02536	2.3.1.-	0.0,0.0,0.0,0.0,0.0,0.0,0.0,0.0,0.0,0.0,0.0,0.0,0.0,0.0,0.0,0.0,0.0,0.0,0.0,0.0,0.0,0.0,0.0,0.0,0.0,0.0,0.0,0.0,0.0,0.0,0.0,0.0,0.0,0.0,0.0,0.0,0.0,0.0,0.0,0.0,0.0,0.0,3.0,2.0
MG: C alpha-dehydrogenase OS=Sphingomonas paucimobilis GN=ligD PE=3 SV=1 [Q01198] Score: 147.0	UNKNOWN	1.-.-.-	0.0,1.0,0.0,0.0,0.0,2.0,2.0,0.0,1.0,0.0,0.0,0.0,0.0,2.0,0.0,0.0,0.0,1.0,0.0,0.0,0.0,0.0,0.0,3.0,0.0,0.0,0.0,0.0,0.0,0.0,0.0,0.0,0.0,0.0,1.0,1.0,0.0,0.0,1.0,0.0,0.0,0.0,0.0,0.0
MG: Modification methylase XorII OS=Xanthomonas oryzae pv. oryzae (strain KACC10331 / KXO85) GN=xorIIM PE=3 SV=2 [P52311] Score: 508.0	K00558	2.1.1.37	0.0,0.0,0.0,0.0,0.0,0.0,0.0,0.0,0.0,0.0,0.0,0.0,1.0,0.0,0.0,0.0,0.0,0.0,0.0,0.0,0.0,0.0,0.0,0.0,0.0,0.0,0.0,0.0,0.0,0.0,0.0,0.0,0.0,0.0,0.0,0.0,0.0,0.0,0.0,0.0,0.0,0.0,0.0,0.0
CTRL_HUMAN Chymotrypsin-like protease CTRL-1 OS=Homo sapiens GN=CTRL PE=2 SV=1	K09632	3.4.21.-	0.0,0.0,0.0,0.0,0.0,0.0,0.0,0.0,0.0,0.0,0.0,0.0,0.0,0.0,0.0,0.0,0.0,0.0,0.0,0.0,0.0,0.0,0.0,0.0,0.0,0.0,0.0,0.0,0.0,0.0,0.0,0.0,1.0,0.0,1.0,0.0,0.0,0.0,0.0,0.0,0.0,0.0,0.0,0.0
MG: Beta-glucosidase B OS=Paenibacillus polymyxa GN=bglB PE=1 SV=1 [P22505] Score: 165.0	UNKNOWN	3.2.1.21	0.0,0.0,0.0,0.0,0.0,0.0,0.0,0.0,1.0,0.0,4.0,5.0,0.0,0.0,0.0,0.0,0.0,0.0,0.0,0.0,0.0,0.0,0.0,0.0,0.0,0.0,0.0,0.0,0.0,0.0,0.0,0.0,0.0,0.0,0.0,0.0,0.0,0.0,0.0,0.0,0.0,0.0,0.0,0.0
BICC1_HUMAN Protein bicaudal C homolog 1 OS=Homo sapiens GN=BICC1 PE=1 SV=2	K18756	UNKNOWN	0.0,0.0,0.0,0.0,0.0,0.0,0.0,0.0,0.0,0.0,1.0,0.0,0.0,0.0,0.0,0.0,1.0,0.0,0.0,0.0,0.0,0.0,0.0,0.0,0.0,0.0,0.0,0.0,0.0,0.0,0.0,0.0,0.0,0.0,0.0,0.0,0.0,0.0,0.0,0.0,0.0,0.0,0.0,0.0
ACTH_MOUSE Actin, gamma-enteric smooth muscle OS=Mus musculus GN=Actg2 PE=1 SV=1	K12315	UNKNOWN	2.0,0.0,6.0,7.0,0.0,27.0,0.0,0.0,0.0,3.0,74.0,1.0,0.0,0.0,0.0,0.0,0.0,0.0,0.0,0.0,0.0,0.0,44.0,15.0,0.0,0.0,0.0,1.0,0.0,0.0,7.0,4.0,0.0,0.0,0.0,0.0,2.0,0.0,0.0,0.0,0.0,0.0,0.0,0.0
MUKE_SALTY Chromosome partition protein MukE OS=Salmonella typhimurium (strain LT2 / SGSC1412 / ATCC 700720) GN=mukE PE=3 SV=3	K03804	UNKNOWN	0.0,0.0,0.0,0.0,0.0,0.0,0.0,0.0,0.0,0.0,0.0,0.0,0.0,0.0,0.0,0.0,0.0,0.0,0.0,0.0,0.0,0.0,0.0,0.0,0.0,0.0,0.0,0.0,0.0,0.0,0.0,0.0,0.0,0.0,0.0,0.0,0.0,0.0,0.0,0.0,0.0,0.0,1.0,0.0
ERPA_BURP8 Putative iron-sulfur cluster insertion protein ErpA OS=Burkholderia phymatum (strain DSM 17167 / STM815) GN=erpA PE=3 SV=1	K15724	UNKNOWN	0.0,0.0,0.0,0.0,0.0,0.0,0.0,0.0,0.0,0.0,0.0,0.0,0.0,1.0,0.0,0.0,0.0,0.0,0.0,0.0,0.0,0.0,0.0,0.0,0.0,0.0,0.0,0.0,0.0,0.0,0.0,0.0,0.0,0.0,0.0,0.0,0.0,0.0,0.0,0.0,0.0,0.0,0.0,0.0
MG: Ribonuclease HIII OS=Bacillus subtilis (strain 168) GN=rnhC PE=1 SV=2 [P94541] Score: 199.0	K03471	3.1.26.4	0.0,0.0,0.0,0.0,0.0,0.0,0.0,0.0,0.0,0.0,0.0,0.0,0.0,0.0,0.0,0.0,0.0,0.0,0.0,0.0,0.0,0.0,0.0,0.0,0.0,0.0,0.0,0.0,0.0,0.0,0.0,0.0,0.0,0.0,1.0,0.0,0.0,0.0,0.0,0.0,0.0,0.0,0.0,0.0
CLPP_AZOC5 ATP-dependent Clp protease proteolytic subunit OS=Azorhizobium caulinodans (strain ATCC 43989 / DSM 5975 / JCM 20966 / NBRC 14845 / NCIMB 13405 / ORS 571) GN=clpP PE=3 SV=1	K01358	3.4.21.92	0.0,0.0,0.0,0.0,0.0,0.0,0.0,0.0,0.0,0.0,0.0,0.0,0.0,0.0,0.0,0.0,0.0,1.0,0.0,0.0,0.0,0.0,0.0,0.0,0.0,0.0,0.0,0.0,0.0,0.0,0.0,0.0,0.0,0.0,0.0,0.0,1.0,0.0,0.0,0.0,0.0,0.0,0.0,0.0
MG: UPF0051 protein AF_2365 OS=Archaeoglobus fulgidus (strain ATCC 49558 / VC-16 / DSM 4304 / JCM 9628 / NBRC 100126) GN=AF_2365 PE=3 SV=1 [O30305] Score: 88.6	K07033	UNKNOWN	0.0,0.0,0.0,0.0,0.0,0.0,0.0,0.0,0.0,0.0,0.0,0.0,0.0,0.0,0.0,1.0,0.0,0.0,0.0,0.0,0.0,0.0,0.0,0.0,0.0,0.0,0.0,0.0,0.0,0.0,0.0,0.0,0.0,0.0,0.0,0.0,0.0,0.0,0.0,0.0,0.0,0.0,0.0,0.0
MG: Prolyl tripeptidyl peptidase OS=Porphyromonas gingivalis (strain ATCC 33277 / DSM 20709 / JCM 12257) GN=ptpA PE=3 SV=1 [B2RJX3] Score: 228.0	K18574	3.4.14.12	0.0,0.0,0.0,0.0,0.0,1.0,2.0,1.0,1.0,0.0,0.0,0.0,1.0,0.0,0.0,0.0,0.0,0.0,0.0,0.0,2.0,0.0,0.0,0.0,1.0,0.0,0.0,0.0,0.0,0.0,0.0,0.0,1.0,1.0,0.0,0.0,0.0,0.0,0.0,0.0,0.0,0.0,0.0,0.0
MG: Nodulation protein T OS=Rhizobium leguminosarum bv. trifolii GN=nodT PE=3 SV=1 [P24145] Score: 48.9	UNKNOWN	UNKNOWN	0.0,0.0,0.0,0.0,0.0,0.0,0.0,0.0,0.0,0.0,0.0,0.0,0.0,0.0,0.0,0.0,0.0,0.0,0.0,0.0,0.0,0.0,0.0,0.0,0.0,0.0,0.0,0.0,0.0,0.0,0.0,0.0,0.0,0.0,0.0,0.0,0.0,0.0,0.0,1.0,0.0,0.0,0.0,0.0
MG: L-arabinose transport system permease protein AraQ OS=Bacillus halodurans (strain ATCC BAA-125 / DSM 18197 / FERM 7344 / JCM 9153 / C-125) GN=araQ PE=3 SV=1 [Q9KEE9] Score: 156.0	K17236	UNKNOWN	0.0,0.0,4.0,1.0,0.0,0.0,0.0,0.0,0.0,0.0,0.0,0.0,6.0,4.0,6.0,0.0,5.0,7.0,0.0,0.0,0.0,0.0,0.0,1.0,10.0,2.0,2.0,3.0,4.0,1.0,0.0,0.0,6.0,6.0,2.0,5.0,13.0,1.0,0.0,0.0,0.0,1.0,0.0,0.0
GP149_CHICK Probable G-protein coupled receptor 149 OS=Gallus gallus GN=GPR149 PE=2 SV=1	K08433	UNKNOWN	0.0,0.0,0.0,0.0,0.0,0.0,0.0,0.0,0.0,0.0,0.0,0.0,0.0,0.0,0.0,0.0,0.0,0.0,0.0,0.0,0.0,0.0,0.0,0.0,1.0,0.0,0.0,0.0,0.0,0.0,0.0,0.0,0.0,0.0,0.0,0.0,0.0,0.0,0.0,0.0,0.0,0.0,0.0,0.0
MG: Cytidylate kinase OS=Pelobacter carbinolicus (strain DSM 2380 / Gra Bd 1) GN=cmk PE=3 SV=1 [Q3A3D2] Score: 222.0	K00945	2.7.4.25	0.0,0.0,0.0,0.0,0.0,0.0,0.0,0.0,0.0,0.0,0.0,0.0,0.0,0.0,0.0,0.0,0.0,0.0,0.0,0.0,0.0,0.0,0.0,0.0,1.0,0.0,0.0,0.0,0.0,0.0,0.0,0.0,0.0,0.0,0.0,0.0,0.0,0.0,0.0,0.0,0.0,0.0,0.0,0.0
RPOH_METBU DNA-directed RNA polymerase subunit H OS=Methanococcoides burtonii (strain DSM 6242 / NBRC 107633 / OCM 468 / ACE-M) GN=rpoH PE=3 SV=1	K03053	2.7.7.6	0.0,0.0,0.0,0.0,0.0,0.0,0.0,0.0,0.0,0.0,0.0,0.0,0.0,0.0,0.0,0.0,0.0,0.0,0.0,0.0,0.0,1.0,0.0,0.0,0.0,0.0,0.0,0.0,0.0,0.0,0.0,0.0,0.0,0.0,0.0,0.0,0.0,0.0,0.0,0.0,0.0,0.0,0.0,0.0
MG: ATP synthase subunit c OS=Lactobacillus helveticus (strain DPC 4571) GN=atpE PE=3 SV=1 [A8YUJ6] Score: 109.0	K02110	UNKNOWN	0.0,0.0,0.0,0.0,0.0,0.0,0.0,0.0,0.0,0.0,0.0,0.0,1.0,2.0,6.0,1.0,5.0,3.0,0.0,6.0,0.0,0.0,0.0,0.0,16.0,16.0,10.0,11.0,0.0,0.0,0.0,0.0,1.0,0.0,1.0,0.0,0.0,0.0,0.0,0.0,0.0,0.0,0.0,0.0
MG: Plasminogen activator inhibitor 1 OS=Sus scrofa GN=SERPINE1 PE=2 SV=1 [P79335] Score: 107.0	K03982	UNKNOWN	0.0,0.0,0.0,0.0,0.0,0.0,0.0,0.0,0.0,0.0,0.0,0.0,1.0,0.0,0.0,0.0,0.0,0.0,0.0,0.0,0.0,0.0,0.0,0.0,0.0,0.0,0.0,0.0,0.0,0.0,0.0,0.0,0.0,0.0,0.0,0.0,0.0,0.0,0.0,0.0,0.0,0.0,0.0,0.0
THN2_WHEAT Alpha-2-purothionin OS=Triticum aestivum GN=THI1.2 PE=2 SV=1	UNKNOWN	UNKNOWN	3.0,4.0,0.0,0.0,0.0,0.0,0.0,0.0,0.0,0.0,0.0,0.0,0.0,0.0,0.0,0.0,0.0,0.0,0.0,0.0,0.0,0.0,0.0,0.0,0.0,0.0,0.0,0.0,0.0,0.0,0.0,0.0,0.0,0.0,0.0,0.0,0.0,0.0,0.0,0.0,0.0,0.0,0.0,0.0
LPAAT_ARATH 1-acylglycerol-3-phosphate O-acyltransferase OS=Arabidopsis thaliana GN=At4g24160 PE=1 SV=1	UNKNOWN	2.3.1.51	0.0,0.0,0.0,0.0,0.0,0.0,0.0,0.0,0.0,0.0,0.0,0.0,1.0,0.0,0.0,0.0,0.0,0.0,0.0,0.0,0.0,0.0,0.0,0.0,0.0,0.0,0.0,0.0,0.0,0.0,0.0,0.0,0.0,0.0,0.0,0.0,0.0,0.0,0.0,0.0,0.0,0.0,0.0,0.0
MG: L-2-hydroxyisocaproate dehydrogenase OS=Weissella confusa PE=1 SV=3 [P14295] Score: 386.0	UNKNOWN	1.1.1.-	0.0,0.0,0.0,0.0,0.0,0.0,0.0,0.0,0.0,0.0,0.0,0.0,8.0,11.0,8.0,8.0,8.0,7.0,13.0,10.0,0.0,0.0,0.0,0.0,0.0,0.0,0.0,0.0,0.0,0.0,0.0,0.0,0.0,0.0,0.0,0.0,0.0,0.0,0.0,0.0,0.0,0.0,0.0,0.0
QUEA_RICPR S-adenosylmethionine:tRNA ribosyltransferase-isomerase OS=Rickettsia prowazekii (strain Madrid E) GN=queA PE=3 SV=1	K07568	2.4.99.17	0.0,0.0,0.0,0.0,0.0,0.0,0.0,0.0,0.0,0.0,0.0,0.0,0.0,0.0,0.0,0.0,0.0,0.0,0.0,0.0,0.0,0.0,0.0,0.0,1.0,0.0,0.0,0.0,0.0,0.0,0.0,0.0,0.0,0.0,0.0,0.0,0.0,0.0,0.0,0.0,0.0,0.0,0.0,0.0
MG: RNA polymerase sigma-E factor OS=Bacillus subtilis (strain 168) GN=sigE PE=1 SV=1 [P06222] Score: 295.0	K03091	UNKNOWN	0.0,0.0,0.0,0.0,0.0,0.0,0.0,0.0,0.0,0.0,0.0,0.0,0.0,0.0,0.0,0.0,0.0,0.0,0.0,0.0,4.0,3.0,2.0,3.0,0.0,0.0,0.0,0.0,0.0,0.0,0.0,0.0,0.0,0.0,0.0,0.0,1.0,0.0,1.0,0.0,0.0,0.0,1.0,2.0
MURD_RHOP2 UDP-N-acetylmuramoylalanine--D-glutamate ligase OS=Rhodopseudomonas palustris (strain HaA2) GN=murD PE=3 SV=1	K01925	6.3.2.9	0.0,0.0,0.0,0.0,0.0,0.0,0.0,0.0,0.0,0.0,0.0,0.0,0.0,0.0,0.0,0.0,0.0,0.0,0.0,0.0,0.0,0.0,0.0,1.0,0.0,0.0,0.0,0.0,0.0,0.0,0.0,0.0,0.0,0.0,0.0,1.0,0.0,0.0,0.0,0.0,0.0,0.0,0.0,0.0
YS84_CAEEL Uncharacterized RING finger protein ZK945.4 OS=Caenorhabditis elegans GN=ZK945.4 PE=3 SV=3	UNKNOWN	UNKNOWN	0.0,0.0,0.0,0.0,0.0,0.0,0.0,0.0,0.0,0.0,0.0,0.0,1.0,0.0,0.0,0.0,0.0,0.0,0.0,0.0,0.0,0.0,0.0,0.0,0.0,0.0,0.0,0.0,0.0,0.0,0.0,0.0,0.0,0.0,0.0,0.0,0.0,0.0,0.0,0.0,0.0,0.0,0.0,0.0
MG: Spore germination protein GerM OS=Bacillus subtilis (strain 168) GN=gerM PE=1 SV=2 [P39072] Score: 80.5	K06298	UNKNOWN	0.0,0.0,0.0,0.0,0.0,0.0,0.0,0.0,0.0,0.0,2.0,0.0,0.0,0.0,0.0,0.0,0.0,0.0,0.0,0.0,1.0,1.0,0.0,0.0,0.0,0.0,0.0,0.0,0.0,0.0,0.0,0.0,0.0,0.0,0.0,0.0,0.0,0.0,0.0,0.0,0.0,0.0,0.0,0.0
MG: Nicotinate dehydrogenase medium molybdopterin subunit OS=Eubacterium barkeri GN=ndhM PE=1 SV=1 [Q0QLF1] Score: 79.0	UNKNOWN	1.17.1.5	0.0,0.0,0.0,0.0,0.0,0.0,0.0,0.0,0.0,0.0,0.0,0.0,0.0,0.0,0.0,0.0,0.0,0.0,0.0,0.0,0.0,0.0,0.0,0.0,0.0,0.0,0.0,0.0,0.0,0.0,0.0,0.0,0.0,0.0,0.0,1.0,0.0,0.0,0.0,0.0,0.0,0.0,0.0,0.0
MG: Uncharacterized RNA pseudouridine synthase aq_1464 OS=Aquifex aeolicus (strain VF5) GN=aq_1464 PE=3 SV=1 [O67444] Score: 119.0	K06178	5.4.99.-	1.0,2.0,1.0,2.0,0.0,0.0,0.0,0.0,0.0,1.0,0.0,0.0,1.0,0.0,0.0,0.0,0.0,0.0,0.0,0.0,0.0,0.0,0.0,0.0,0.0,0.0,0.0,0.0,0.0,0.0,0.0,0.0,0.0,0.0,0.0,0.0,0.0,2.0,0.0,0.0,0.0,0.0,0.0,0.0
LRR2_PLAF7 Protein PFF0380w OS=Plasmodium falciparum (isolate 3D7) GN=PFF0380w PE=3 SV=1	UNKNOWN	UNKNOWN	0.0,0.0,0.0,0.0,0.0,0.0,0.0,0.0,0.0,0.0,0.0,0.0,0.0,0.0,0.0,0.0,0.0,0.0,0.0,0.0,0.0,0.0,0.0,0.0,1.0,0.0,0.0,1.0,0.0,0.0,0.0,1.0,0.0,0.0,0.0,0.0,0.0,1.0,0.0,0.0,0.0,0.0,0.0,0.0
MG: Autonomous glycyl radical cofactor OS=Vibrio cholerae serotype O1 (strain ATCC 39315 / El Tor Inaba N16961) GN=grcA PE=3 SV=1 [Q9KPK6] Score: 85.9	K06866	UNKNOWN	0.0,0.0,0.0,0.0,0.0,0.0,0.0,0.0,0.0,0.0,0.0,0.0,0.0,0.0,0.0,0.0,0.0,0.0,0.0,0.0,0.0,0.0,0.0,0.0,0.0,0.0,0.0,0.0,0.0,0.0,0.0,0.0,0.0,0.0,0.0,0.0,0.0,0.0,0.0,0.0,1.0,0.0,0.0,0.0
MG: Putative ATP-dependent DNA helicase Q1 OS=Caenorhabditis briggsae GN=CBG24191 PE=3 SV=1 [A8WK63] Score: 180.0	K10899	3.6.4.12	0.0,0.0,0.0,0.0,0.0,0.0,0.0,0.0,0.0,0.0,0.0,0.0,0.0,0.0,0.0,0.0,0.0,0.0,0.0,1.0,0.0,0.0,0.0,0.0,0.0,0.0,0.0,0.0,0.0,0.0,0.0,0.0,0.0,0.0,0.0,0.0,0.0,0.0,0.0,0.0,0.0,0.0,0.0,0.0
MG: Cobalamin biosynthesis protein CobD OS=Dehalococcoides mccartyi (strain CBDB1) GN=cobD PE=3 SV=1 [Q3ZX56] Score: 190.0	K02227	UNKNOWN	0.0,0.0,0.0,0.0,0.0,0.0,0.0,0.0,0.0,0.0,0.0,0.0,0.0,0.0,0.0,1.0,0.0,0.0,0.0,1.0,0.0,0.0,0.0,0.0,0.0,0.0,0.0,0.0,0.0,0.0,0.0,0.0,0.0,0.0,0.0,0.0,0.0,0.0,0.0,0.0,0.0,0.0,0.0,0.0
3HBH_CORGL 3-hydroxybenzoate 6-hydroxylase OS=Corynebacterium glutamicum (strain ATCC 13032 / DSM 20300 / JCM 1318 / LMG 3730 / NCIMB 10025) GN=Cgl3026 PE=1 SV=1	K00480	1.14.13.24	0.0,0.0,0.0,0.0,0.0,0.0,0.0,0.0,0.0,0.0,0.0,0.0,0.0,0.0,0.0,0.0,0.0,0.0,0.0,0.0,0.0,0.0,0.0,0.0,0.0,0.0,0.0,0.0,0.0,0.0,0.0,0.0,0.0,0.0,0.0,0.0,0.0,0.0,0.0,0.0,0.0,0.0,1.0,0.0
PSD_AGRVS Phosphatidylserine decarboxylase proenzyme OS=Agrobacterium vitis (strain S4 / ATCC BAA-846) GN=psd PE=3 SV=1	K01613	4.1.1.65	0.0,0.0,0.0,0.0,0.0,0.0,0.0,0.0,0.0,0.0,0.0,0.0,0.0,0.0,0.0,0.0,0.0,1.0,0.0,0.0,0.0,0.0,0.0,0.0,0.0,0.0,0.0,0.0,0.0,0.0,0.0,0.0,0.0,0.0,1.0,0.0,0.0,0.0,0.0,0.0,0.0,0.0,0.0,0.0
RS10_MYCA9 30S ribosomal protein S10 OS=Mycobacterium abscessus (strain ATCC 19977 / DSM 44196) GN=rpsJ PE=3 SV=1	K02946	UNKNOWN	0.0,0.0,2.0,5.0,0.0,0.0,7.0,0.0,0.0,0.0,0.0,0.0,0.0,0.0,0.0,0.0,0.0,0.0,0.0,0.0,0.0,1.0,0.0,0.0,0.0,0.0,1.0,0.0,0.0,0.0,0.0,0.0,0.0,0.0,0.0,0.0,0.0,0.0,1.0,1.0,2.0,0.0,0.0,0.0
GLNA_MACFA Glutamine synthetase OS=Macaca fascicularis GN=GLUL PE=2 SV=3	K01915	4.1.1.15,6.3.1.2	0.0,0.0,0.0,0.0,0.0,1.0,0.0,0.0,0.0,0.0,2.0,0.0,0.0,0.0,0.0,0.0,0.0,0.0,0.0,0.0,0.0,0.0,0.0,0.0,0.0,0.0,0.0,0.0,0.0,0.0,0.0,0.0,0.0,0.0,0.0,0.0,0.0,0.0,0.0,0.0,0.0,0.0,0.0,0.0
CAPSD_TRSV Capsid protein OS=Tobacco ringspot virus PE=1 SV=1	UNKNOWN	UNKNOWN	0.0,0.0,0.0,0.0,0.0,0.0,0.0,0.0,0.0,0.0,0.0,0.0,0.0,0.0,0.0,0.0,0.0,0.0,0.0,0.0,0.0,0.0,0.0,0.0,0.0,0.0,0.0,0.0,0.0,0.0,0.0,0.0,0.0,0.0,0.0,0.0,0.0,0.0,0.0,1.0,0.0,0.0,0.0,0.0
FPG_DEIRA Formamidopyrimidine-DNA glycosylase OS=Deinococcus radiodurans (strain ATCC 13939 / DSM 20539 / JCM 16871 / LMG 4051 / NBRC 15346 / NCIMB 9279 / R1 / VKM B-1422) GN=mutM PE=3 SV=4	K10563	3.2.2.23,4.2.99.18	0.0,0.0,0.0,0.0,1.0,2.0,1.0,1.0,1.0,0.0,0.0,1.0,0.0,0.0,0.0,0.0,0.0,0.0,0.0,0.0,0.0,0.0,0.0,0.0,0.0,0.0,0.0,0.0,0.0,0.0,0.0,0.0,0.0,0.0,0.0,0.0,0.0,0.0,0.0,0.0,0.0,0.0,0.0,0.0
MG: Sensor histidine kinase YclK OS=Bacillus subtilis (strain 168) GN=yclK PE=3 SV=1 [P94414] Score: 190.0	UNKNOWN	2.7.13.3	0.0,0.0,0.0,0.0,0.0,0.0,0.0,0.0,0.0,0.0,1.0,0.0,1.0,3.0,3.0,4.0,3.0,6.0,0.0,0.0,0.0,1.0,0.0,1.0,0.0,0.0,0.0,0.0,0.0,0.0,0.0,0.0,0.0,0.0,1.0,0.0,0.0,0.0,0.0,0.0,0.0,0.0,0.0,0.0
APRL6_ORYSJ 5'-adenylylsulfate reductase-like 6 OS=Oryza sativa subsp. japonica GN=APRL6 PE=3 SV=1	UNKNOWN	UNKNOWN	0.0,0.0,0.0,0.0,0.0,0.0,0.0,0.0,0.0,0.0,0.0,0.0,0.0,0.0,0.0,0.0,0.0,0.0,0.0,0.0,0.0,0.0,0.0,0.0,0.0,0.0,0.0,0.0,0.0,0.0,0.0,0.0,0.0,0.0,0.0,0.0,0.0,1.0,0.0,0.0,0.0,0.0,0.0,0.0
MG: PGA synthase CapB OS=Bacillus subtilis (strain 168) GN=capB PE=4 SV=3 [P96736] Score: 188.0	UNKNOWN	6.3.2.-	0.0,0.0,0.0,0.0,1.0,0.0,0.0,0.0,0.0,0.0,0.0,0.0,0.0,0.0,0.0,0.0,1.0,0.0,0.0,0.0,0.0,0.0,0.0,0.0,0.0,0.0,0.0,0.0,0.0,0.0,0.0,0.0,0.0,0.0,0.0,0.0,0.0,0.0,0.0,0.0,0.0,0.0,0.0,0.0
MG: Dihydrolipoyllysine-residue acetyltransferase component of pyruvate dehydrogenase complex OS=Staphylococcus aureus (strain COL) GN=pdhC PE=3 SV=1 [Q5HGY9] Score: 370.0	K00627	2.3.1.12	0.0,0.0,0.0,1.0,0.0,0.0,0.0,0.0,0.0,0.0,0.0,0.0,0.0,0.0,0.0,0.0,0.0,0.0,0.0,0.0,0.0,0.0,0.0,0.0,0.0,0.0,0.0,0.0,0.0,0.0,0.0,0.0,0.0,0.0,0.0,0.0,0.0,0.0,0.0,0.0,0.0,0.0,0.0,0.0
MG: Flagellar P-ring protein OS=Geobacter sulfurreducens (strain ATCC 51573 / DSM 12127 / PCA) GN=flgI PE=3 SV=1 [Q748F5] Score: 358.0	K02394	UNKNOWN	0.0,0.0,0.0,0.0,0.0,0.0,0.0,0.0,0.0,0.0,0.0,0.0,0.0,0.0,0.0,0.0,0.0,0.0,0.0,0.0,0.0,0.0,0.0,0.0,2.0,0.0,1.0,1.0,0.0,0.0,1.0,0.0,0.0,0.0,0.0,1.0,0.0,0.0,0.0,0.0,0.0,0.0,0.0,0.0
MG: Two-component response regulator ARR22 OS=Arabidopsis thaliana GN=ARR22 PE=2 SV=1 [Q9M8Y4] Score: 43.1	UNKNOWN	UNKNOWN	0.0,0.0,0.0,0.0,0.0,0.0,0.0,0.0,0.0,0.0,0.0,0.0,0.0,0.0,0.0,0.0,0.0,0.0,0.0,0.0,0.0,0.0,0.0,0.0,0.0,0.0,0.0,0.0,0.0,0.0,0.0,0.0,0.0,0.0,0.0,0.0,0.0,0.0,0.0,0.0,0.0,0.0,1.0,0.0
RS5_SHELP 30S ribosomal protein S5 OS=Shewanella loihica (strain ATCC BAA-1088 / PV-4) GN=rpsE PE=3 SV=1	K02988	UNKNOWN	0.0,0.0,0.0,0.0,0.0,0.0,0.0,0.0,0.0,0.0,0.0,0.0,0.0,0.0,0.0,0.0,0.0,0.0,0.0,0.0,0.0,0.0,0.0,0.0,0.0,0.0,0.0,0.0,0.0,0.0,0.0,0.0,0.0,0.0,0.0,0.0,0.0,0.0,0.0,0.0,0.0,0.0,39.0,0.0
F188B_PONAB Protein FAM188B OS=Pongo abelii GN=FAM188B PE=2 SV=1	UNKNOWN	UNKNOWN	0.0,0.0,0.0,0.0,0.0,0.0,0.0,0.0,0.0,0.0,0.0,0.0,1.0,0.0,0.0,0.0,0.0,0.0,0.0,0.0,0.0,0.0,0.0,0.0,0.0,0.0,0.0,0.0,0.0,0.0,0.0,0.0,0.0,0.0,0.0,0.0,0.0,0.0,0.0,0.0,0.0,0.0,0.0,0.0
LBD38_ARATH LOB domain-containing protein 38 OS=Arabidopsis thaliana GN=LBD38 PE=2 SV=1	UNKNOWN	UNKNOWN	0.0,0.0,0.0,0.0,0.0,0.0,0.0,0.0,0.0,0.0,0.0,0.0,0.0,0.0,0.0,0.0,0.0,0.0,0.0,0.0,1.0,0.0,0.0,0.0,0.0,0.0,0.0,0.0,0.0,0.0,0.0,0.0,0.0,0.0,0.0,0.0,0.0,0.0,0.0,0.0,0.0,0.0,0.0,0.0
PSBR_TOBAC Photosystem II 10 kDa polypeptide, chloroplastic OS=Nicotiana tabacum GN=PSBR PE=2 SV=1	UNKNOWN	UNKNOWN	1.0,0.0,0.0,0.0,0.0,0.0,1.0,0.0,0.0,0.0,0.0,0.0,0.0,0.0,0.0,0.0,0.0,0.0,0.0,0.0,0.0,0.0,0.0,0.0,0.0,0.0,0.0,0.0,0.0,0.0,0.0,1.0,0.0,0.0,0.0,0.0,0.0,0.0,1.0,1.0,0.0,0.0,0.0,0.0
ILVD_COLP3 Dihydroxy-acid dehydratase OS=Colwellia psychrerythraea (strain 34H / ATCC BAA-681) GN=ilvD PE=3 SV=1	K01687	4.2.1.9	0.0,0.0,0.0,1.0,1.0,2.0,0.0,1.0,0.0,0.0,0.0,0.0,1.0,2.0,2.0,1.0,2.0,0.0,1.0,0.0,0.0,0.0,0.0,0.0,0.0,0.0,0.0,0.0,0.0,0.0,0.0,0.0,0.0,0.0,0.0,1.0,1.0,0.0,1.0,0.0,0.0,0.0,0.0,0.0
DNLJ_ECOL6 DNA ligase OS=Escherichia coli O6:H1 (strain CFT073 / ATCC 700928 / UPEC) GN=ligA PE=3 SV=1	K01972	6.5.1.2	0.0,0.0,0.0,0.0,0.0,0.0,0.0,0.0,0.0,0.0,0.0,0.0,0.0,0.0,0.0,0.0,0.0,0.0,0.0,0.0,0.0,0.0,0.0,0.0,1.0,0.0,0.0,0.0,0.0,0.0,0.0,0.0,0.0,0.0,0.0,0.0,0.0,0.0,0.0,0.0,0.0,0.0,0.0,0.0
YN27_SCHPO Uncharacterized protein C530.07c OS=Schizosaccharomyces pombe (strain 972 / ATCC 24843) GN=SPBC530.07c PE=4 SV=1	UNKNOWN	UNKNOWN	0.0,0.0,0.0,0.0,0.0,0.0,0.0,0.0,0.0,0.0,0.0,0.0,0.0,0.0,0.0,0.0,0.0,0.0,0.0,1.0,0.0,0.0,0.0,0.0,0.0,0.0,0.0,0.0,0.0,0.0,0.0,0.0,0.0,0.0,0.0,0.0,0.0,0.0,0.0,0.0,0.0,0.0,0.0,0.0
MG: Dihydrolipoyl dehydrogenase OS=Corynebacterium glutamicum (strain ATCC 13032 / DSM 20300 / JCM 1318 / LMG 3730 / NCIMB 10025) GN=lpd PE=1 SV=1 [Q8NTE1] Score: 250.0	K00382	1.8.1.4	0.0,0.0,0.0,0.0,0.0,0.0,0.0,0.0,0.0,0.0,0.0,0.0,0.0,0.0,0.0,0.0,0.0,0.0,0.0,0.0,1.0,4.0,0.0,0.0,1.0,3.0,2.0,2.0,0.0,2.0,4.0,2.0,2.0,10.0,2.0,10.0,4.0,1.0,10.0,3.0,0.0,0.0,0.0,0.0
MG: Uncharacterized protein YdbL OS=Escherichia coli (strain K12) GN=ydbL PE=3 SV=2 [P76076] Score: 64.7	K09978	UNKNOWN	0.0,0.0,0.0,0.0,0.0,0.0,0.0,0.0,0.0,0.0,0.0,0.0,0.0,0.0,0.0,0.0,0.0,0.0,0.0,0.0,0.0,0.0,0.0,0.0,0.0,0.0,0.0,0.0,1.0,0.0,0.0,0.0,0.0,0.0,0.0,0.0,0.0,0.0,0.0,0.0,0.0,0.0,0.0,0.0
INT7_BOVIN Integrator complex subunit 7 OS=Bos taurus GN=INTS7 PE=2 SV=1	K13144	UNKNOWN	0.0,0.0,0.0,0.0,0.0,0.0,0.0,0.0,0.0,0.0,0.0,0.0,0.0,0.0,0.0,0.0,0.0,0.0,0.0,0.0,0.0,0.0,0.0,0.0,0.0,0.0,0.0,0.0,0.0,1.0,0.0,0.0,0.0,0.0,0.0,0.0,0.0,0.0,0.0,0.0,0.0,0.0,0.0,0.0
BSHB2_BACAN Probable N-acetyl-alpha-D-glucosaminyl L-malate deacetylase 2 OS=Bacillus anthracis GN=bshB2 PE=1 SV=1	UNKNOWN	3.5.1.-	0.0,0.0,0.0,0.0,0.0,0.0,0.0,0.0,0.0,0.0,0.0,0.0,0.0,0.0,0.0,0.0,0.0,0.0,0.0,0.0,0.0,1.0,0.0,0.0,0.0,0.0,0.0,0.0,0.0,0.0,0.0,0.0,0.0,0.0,0.0,0.0,0.0,0.0,0.0,0.0,0.0,0.0,0.0,0.0
SEMG2_PONAB Semenogelin-2 OS=Pongo abelii GN=SEMG2 PE=3 SV=1	UNKNOWN	UNKNOWN	0.0,0.0,0.0,0.0,0.0,0.0,0.0,0.0,0.0,1.0,0.0,0.0,0.0,0.0,0.0,0.0,0.0,0.0,0.0,5.0,0.0,0.0,0.0,0.0,0.0,0.0,0.0,0.0,0.0,0.0,1.0,0.0,0.0,0.0,0.0,0.0,0.0,0.0,0.0,0.0,0.0,0.0,0.0,0.0
RNO_DROME PHD finger protein rhinoceros OS=Drosophila melanogaster GN=rno PE=1 SV=1	UNKNOWN	UNKNOWN	0.0,0.0,0.0,0.0,1.0,0.0,0.0,0.0,0.0,0.0,0.0,0.0,0.0,0.0,0.0,0.0,0.0,0.0,0.0,0.0,0.0,0.0,0.0,0.0,0.0,0.0,0.0,0.0,0.0,0.0,0.0,0.0,0.0,0.0,0.0,0.0,0.0,0.0,0.0,0.0,0.0,0.0,0.0,0.0
ZAPD_BURPP Cell division protein ZapD OS=Burkholderia phytofirmans (strain DSM 17436 / PsJN) GN=zapD PE=3 SV=1	K18778	UNKNOWN	0.0,0.0,0.0,0.0,0.0,0.0,0.0,0.0,0.0,0.0,0.0,0.0,0.0,0.0,0.0,0.0,0.0,0.0,0.0,0.0,0.0,0.0,0.0,0.0,0.0,0.0,0.0,0.0,0.0,0.0,0.0,0.0,0.0,0.0,0.0,0.0,0.0,0.0,0.0,0.0,1.0,0.0,0.0,0.0
MUTE_ARATH Transcription factor MUTE OS=Arabidopsis thaliana GN=MUTE PE=2 SV=1	UNKNOWN	UNKNOWN	0.0,0.0,2.0,1.0,0.0,0.0,2.0,4.0,0.0,1.0,0.0,1.0,0.0,0.0,0.0,0.0,0.0,0.0,0.0,0.0,0.0,0.0,0.0,0.0,0.0,0.0,0.0,0.0,0.0,0.0,0.0,0.0,0.0,0.0,0.0,0.0,0.0,0.0,0.0,0.0,0.0,0.0,0.0,0.0
UCRIA_PEA Cytochrome b6-f complex iron-sulfur subunit, chloroplastic OS=Pisum sativum GN=petC PE=2 SV=1	UNKNOWN	1.10.9.1	0.0,0.0,0.0,0.0,0.0,0.0,1.0,3.0,0.0,0.0,0.0,0.0,0.0,0.0,0.0,0.0,0.0,0.0,0.0,0.0,0.0,0.0,0.0,0.0,0.0,0.0,0.0,0.0,0.0,0.0,0.0,0.0,0.0,0.0,0.0,0.0,0.0,0.0,0.0,0.0,0.0,0.0,0.0,0.0
MODC_RHOPS Molybdenum import ATP-binding protein ModC OS=Rhodopseudomonas palustris (strain BisB5) GN=modC PE=3 SV=1	K02017	3.6.3.29	1.0,0.0,0.0,0.0,0.0,0.0,0.0,0.0,0.0,0.0,0.0,0.0,0.0,0.0,0.0,0.0,0.0,0.0,0.0,0.0,0.0,0.0,0.0,0.0,0.0,0.0,0.0,0.0,0.0,0.0,0.0,0.0,0.0,0.0,0.0,0.0,0.0,0.0,0.0,0.0,0.0,0.0,0.0,0.0
MG: L-xylulose reductase OS=Caenorhabditis elegans GN=dhs-21 PE=1 SV=2 [Q21929] Score: 153.0	K03331	1.1.1.10	0.0,0.0,0.0,0.0,0.0,0.0,0.0,0.0,0.0,0.0,0.0,0.0,0.0,0.0,0.0,0.0,0.0,0.0,0.0,0.0,0.0,0.0,0.0,0.0,0.0,0.0,0.0,0.0,0.0,0.0,0.0,0.0,0.0,0.0,0.0,0.0,0.0,0.0,0.0,1.0,0.0,0.0,0.0,0.0
MG: 50S ribosomal protein L10 OS=Clostridium perfringens (strain 13 / Type A) GN=rplJ PE=3 SV=1 [Q8XHR6] Score: 165.0	K02864	UNKNOWN	3.0,2.0,12.0,3.0,40.0,53.0,29.0,46.0,58.0,64.0,48.0,51.0,18.0,32.0,0.0,0.0,4.0,0.0,0.0,0.0,52.0,69.0,68.0,41.0,3.0,0.0,0.0,1.0,38.0,63.0,26.0,67.0,12.0,11.0,29.0,60.0,80.0,37.0,32.0,29.0,0.0,1.0,0.0,9.0
MG: Uncharacterized protein MJECL43 OS=Methanocaldococcus jannaschii (strain ATCC 43067 / DSM 2661 / JAL-1 / JCM 10045 / NBRC 100440) GN=MJECL43 PE=4 SV=1 [Q60298] Score: 52.0	UNKNOWN	UNKNOWN	0.0,0.0,0.0,0.0,0.0,0.0,0.0,0.0,0.0,0.0,0.0,0.0,0.0,0.0,0.0,0.0,0.0,0.0,0.0,0.0,0.0,0.0,0.0,0.0,0.0,0.0,0.0,0.0,1.0,0.0,0.0,0.0,0.0,0.0,0.0,0.0,0.0,0.0,0.0,0.0,0.0,0.0,0.0,0.0
KCY_ROSCS Cytidylate kinase OS=Roseiflexus castenholzii (strain DSM 13941 / HLO8) GN=cmk PE=3 SV=1	K00945	2.7.4.25	0.0,0.0,0.0,0.0,0.0,0.0,0.0,0.0,0.0,0.0,0.0,0.0,0.0,0.0,0.0,0.0,0.0,0.0,0.0,0.0,0.0,0.0,0.0,0.0,0.0,0.0,0.0,0.0,0.0,0.0,0.0,0.0,0.0,0.0,0.0,0.0,0.0,1.0,0.0,0.0,0.0,0.0,0.0,0.0
GCST_SHISS Aminomethyltransferase OS=Shigella sonnei (strain Ss046) GN=gcvT PE=3 SV=1	K00605	2.1.2.10	0.0,0.0,0.0,0.0,0.0,0.0,0.0,0.0,0.0,0.0,0.0,0.0,0.0,0.0,0.0,0.0,0.0,0.0,0.0,0.0,0.0,0.0,0.0,0.0,0.0,0.0,0.0,0.0,0.0,0.0,0.0,0.0,0.0,0.0,0.0,0.0,0.0,0.0,0.0,0.0,0.0,0.0,3.0,0.0
POLS_IBDVA Structural polyprotein OS=Avian infectious bursal disease virus (strain Australian 002-73) PE=3 SV=2	UNKNOWN	3.4.21.-	0.0,0.0,0.0,0.0,0.0,0.0,0.0,0.0,0.0,0.0,0.0,0.0,0.0,0.0,0.0,0.0,0.0,0.0,0.0,0.0,0.0,0.0,0.0,0.0,0.0,0.0,0.0,0.0,0.0,0.0,0.0,0.0,0.0,0.0,0.0,0.0,0.0,0.0,1.0,0.0,0.0,0.0,0.0,0.0
MG: Uncharacterized metallophosphoesterase YhaO OS=Bacillus subtilis (strain 168) GN=yhaO PE=2 SV=1 [O07522] Score: 87.4	UNKNOWN	UNKNOWN	0.0,0.0,0.0,0.0,0.0,0.0,0.0,0.0,0.0,1.0,0.0,0.0,0.0,0.0,0.0,0.0,0.0,0.0,0.0,0.0,0.0,0.0,0.0,0.0,0.0,0.0,0.0,0.0,0.0,0.0,0.0,0.0,0.0,0.0,1.0,0.0,0.0,0.0,0.0,0.0,0.0,0.0,0.0,0.0
YL170_MIMIV Putative FNIP repeat-containing protein L170 OS=Acanthamoeba polyphaga mimivirus GN=MIMI_L170 PE=4 SV=1	UNKNOWN	UNKNOWN	0.0,0.0,0.0,0.0,0.0,0.0,0.0,0.0,0.0,0.0,0.0,0.0,0.0,0.0,0.0,1.0,0.0,0.0,0.0,0.0,0.0,0.0,0.0,0.0,0.0,0.0,0.0,0.0,0.0,0.0,0.0,0.0,0.0,0.0,0.0,0.0,0.0,0.0,0.0,0.0,0.0,0.0,0.0,0.0
MG: Transcriptional repressor SmtB homolog OS=Synechocystis sp. (strain PCC 6803 / Kazusa) GN=ziaR PE=1 SV=1 [Q55940] Score: 100.0	UNKNOWN	UNKNOWN	0.0,0.0,0.0,0.0,0.0,0.0,0.0,0.0,1.0,0.0,0.0,0.0,0.0,0.0,0.0,0.0,0.0,0.0,0.0,1.0,0.0,0.0,0.0,1.0,0.0,0.0,0.0,0.0,0.0,0.0,0.0,0.0,0.0,0.0,0.0,0.0,0.0,0.0,0.0,0.0,0.0,0.0,0.0,0.0
MG: 6-carboxy-5,6,7,8-tetrahydropterin synthase OS=Rickettsia typhi (strain ATCC VR-144 / Wilmington) GN=queD PE=3 SV=1 [Q68XI9] Score: 48.1	K01737	4.1.2.50	13.0,11.0,3.0,1.0,8.0,7.0,18.0,10.0,5.0,0.0,0.0,2.0,0.0,0.0,0.0,0.0,0.0,0.0,0.0,0.0,8.0,9.0,15.0,9.0,0.0,0.0,0.0,0.0,0.0,0.0,0.0,0.0,0.0,0.0,0.0,0.0,0.0,0.0,9.0,11.0,1.0,8.0,1.0,3.0
MG: D-cysteine desulfhydrase OS=Serratia proteamaculans (strain 568) GN=dcyD PE=3 SV=1 [A8GFZ8] Score: 125.0	K05396	4.4.1.15	0.0,0.0,0.0,0.0,0.0,0.0,0.0,0.0,0.0,0.0,0.0,0.0,1.0,1.0,0.0,1.0,2.0,1.0,0.0,0.0,0.0,0.0,0.0,0.0,0.0,0.0,0.0,0.0,0.0,0.0,0.0,0.0,0.0,0.0,0.0,0.0,0.0,0.0,0.0,0.0,0.0,0.0,2.0,0.0
MG: 4-diphosphocytidyl-2-C-methyl-D-erythritol kinase OS=Clostridium phytofermentans (strain ATCC 700394 / DSM 18823 / ISDg) GN=ispE PE=3 SV=1 [A9KKE9] Score: 323.0	K00919	2.7.1.148	0.0,0.0,0.0,0.0,0.0,0.0,0.0,0.0,0.0,0.0,0.0,0.0,0.0,0.0,0.0,0.0,0.0,0.0,1.0,0.0,0.0,0.0,0.0,0.0,0.0,0.0,0.0,0.0,0.0,0.0,0.0,0.0,0.0,0.0,0.0,0.0,0.0,0.0,0.0,0.0,0.0,0.0,0.0,0.0
PMA4_NICPL Plasma membrane ATPase 4 OS=Nicotiana plumbaginifolia GN=PMA4 PE=1 SV=1	UNKNOWN	3.6.3.6	0.0,1.0,0.0,0.0,0.0,0.0,0.0,0.0,0.0,0.0,0.0,0.0,1.0,0.0,0.0,0.0,0.0,0.0,0.0,0.0,0.0,0.0,0.0,0.0,0.0,0.0,0.0,0.0,0.0,0.0,0.0,0.0,0.0,0.0,0.0,0.0,0.0,0.0,0.0,0.0,0.0,0.0,0.0,0.0
MG: Tryptophan--tRNA ligase OS=Clostridium tetani (strain Massachusetts / E88) GN=trpS PE=3 SV=1 [Q891C7] Score: 478.0	K01867	6.1.1.2	0.0,0.0,0.0,0.0,0.0,0.0,0.0,0.0,0.0,0.0,0.0,0.0,0.0,0.0,2.0,0.0,0.0,0.0,0.0,0.0,0.0,0.0,0.0,1.0,0.0,0.0,0.0,0.0,0.0,0.0,0.0,0.0,0.0,0.0,0.0,0.0,0.0,0.0,0.0,0.0,0.0,0.0,2.0,0.0
MG: Flagellar motor switch protein FliM OS=Bacillus subtilis (strain 168) GN=fliM PE=1 SV=1 [P23453] Score: 177.0	K02416	UNKNOWN	3.0,0.0,4.0,5.0,6.0,6.0,3.0,0.0,7.0,6.0,10.0,6.0,7.0,7.0,7.0,17.0,12.0,15.0,1.0,19.0,7.0,6.0,6.0,9.0,5.0,0.0,0.0,0.0,0.0,0.0,0.0,0.0,0.0,0.0,0.0,0.0,0.0,0.0,14.0,15.0,0.0,0.0,0.0,0.0
TF2B_XENLA Transcription initiation factor IIB OS=Xenopus laevis GN=gtf2b PE=2 SV=1	K03124	UNKNOWN	0.0,0.0,0.0,0.0,0.0,0.0,0.0,0.0,0.0,0.0,0.0,0.0,1.0,0.0,0.0,1.0,0.0,0.0,0.0,0.0,0.0,0.0,0.0,0.0,0.0,0.0,0.0,0.0,0.0,0.0,0.0,0.0,0.0,0.0,0.0,0.0,0.0,0.0,0.0,0.0,0.0,0.0,0.0,0.0
MG: Flagellar hook-basal body complex protein FliE OS=Thermotoga maritima (strain ATCC 43589 / MSB8 / DSM 3109 / JCM 10099) GN=fliE PE=3 SV=1 [Q9X186] Score: 76.6	K02408	UNKNOWN	0.0,0.0,0.0,0.0,0.0,0.0,0.0,0.0,0.0,0.0,0.0,0.0,4.0,2.0,2.0,0.0,2.0,2.0,0.0,1.0,0.0,0.0,0.0,0.0,0.0,0.0,0.0,0.0,0.0,0.0,0.0,0.0,0.0,0.0,0.0,0.0,0.0,0.0,0.0,0.0,0.0,0.0,0.0,0.0
MG: Uncharacterized ABC transporter ATP-binding protein MJ1242 OS=Methanocaldococcus jannaschii (strain ATCC 43067 / DSM 2661 / JAL-1 / JCM 10045 / NBRC 100440) GN=MJ1242 PE=3 SV=1 [Q58639] Score: 612.0	K00400	UNKNOWN	0.0,0.0,0.0,0.0,12.0,1.0,14.0,7.0,47.0,27.0,13.0,21.0,15.0,8.0,14.0,4.0,6.0,13.0,10.0,4.0,0.0,1.0,0.0,0.0,0.0,0.0,0.0,1.0,0.0,0.0,0.0,0.0,0.0,0.0,0.0,0.0,0.0,0.0,33.0,21.0,0.0,0.0,0.0,3.0
VP24_MABVP Membrane-associated protein VP24 OS=Lake Victoria marburgvirus (strain Popp-67) GN=VP24 PE=3 SV=1	UNKNOWN	UNKNOWN	0.0,0.0,0.0,0.0,0.0,0.0,0.0,0.0,0.0,0.0,0.0,0.0,0.0,0.0,0.0,0.0,0.0,0.0,0.0,0.0,0.0,0.0,0.0,0.0,0.0,0.0,0.0,0.0,0.0,0.0,0.0,0.0,0.0,0.0,0.0,0.0,0.0,0.0,0.0,0.0,0.0,0.0,1.0,0.0
DIT1_ARATH Dicarboxylate transporter 1, chloroplastic OS=Arabidopsis thaliana GN=DIT1 PE=1 SV=1	UNKNOWN	UNKNOWN	7.0,6.0,4.0,6.0,5.0,4.0,6.0,7.0,11.0,7.0,6.0,9.0,2.0,0.0,0.0,0.0,0.0,0.0,0.0,0.0,10.0,11.0,5.0,3.0,3.0,2.0,2.0,2.0,4.0,3.0,2.0,2.0,6.0,2.0,3.0,4.0,0.0,7.0,7.0,4.0,1.0,2.0,1.0,1.0
MG: Cytidylate kinase OS=Pyrobaculum aerophilum (strain ATCC 51768 / IM2 / DSM 7523 / JCM 9630 / NBRC 100827) GN=cmk PE=3 SV=1 [Q8ZTJ1] Score: 52.4	K00945	2.7.4.25	0.0,0.0,0.0,0.0,0.0,0.0,0.0,0.0,0.0,0.0,1.0,0.0,0.0,0.0,0.0,0.0,0.0,0.0,0.0,0.0,0.0,0.0,0.0,0.0,0.0,0.0,0.0,0.0,0.0,0.0,0.0,0.0,0.0,0.0,0.0,0.0,0.0,0.0,0.0,0.0,0.0,0.0,0.0,0.0
MG: Thioredoxin-1 OS=Salmonella typhimurium (strain LT2 / SGSC1412 / ATCC 700720) GN=trxA PE=3 SV=2 [P0AA28] Score: 105.0	K03671	UNKNOWN	0.0,0.0,0.0,0.0,0.0,1.0,2.0,2.0,0.0,1.0,0.0,0.0,0.0,0.0,0.0,0.0,0.0,0.0,0.0,0.0,1.0,2.0,0.0,0.0,0.0,0.0,0.0,0.0,0.0,0.0,0.0,0.0,0.0,0.0,0.0,0.0,0.0,0.0,5.0,3.0,0.0,0.0,0.0,0.0
ASG1_YEAST Activator of stress genes 1 OS=Saccharomyces cerevisiae (strain ATCC 204508 / S288c) GN=ASG1 PE=1 SV=1	UNKNOWN	UNKNOWN	0.0,0.0,0.0,0.0,1.0,0.0,0.0,0.0,0.0,0.0,0.0,0.0,0.0,0.0,0.0,0.0,0.0,0.0,0.0,0.0,0.0,0.0,0.0,0.0,0.0,0.0,0.0,0.0,0.0,0.0,0.0,0.0,0.0,0.0,0.0,0.0,0.0,0.0,0.0,0.0,0.0,0.0,0.0,0.0
HSPB1_HUMAN Heat shock protein beta-1 OS=Homo sapiens GN=HSPB1 PE=1 SV=2	UNKNOWN	UNKNOWN	0.0,0.0,1.0,2.0,1.0,17.0,0.0,0.0,0.0,0.0,48.0,0.0,0.0,0.0,0.0,0.0,0.0,0.0,0.0,0.0,0.0,0.0,28.0,0.0,0.0,0.0,0.0,0.0,0.0,0.0,0.0,0.0,0.0,0.0,0.0,0.0,0.0,0.0,0.0,0.0,0.0,0.0,0.0,0.0
MG: Uncharacterized protein HI_0894 OS=Haemophilus influenzae (strain ATCC 51907 / DSM 11121 / KW20 / Rd) GN=HI_0894 PE=3 SV=2 [Q57500] Score: 73.6	K03585	UNKNOWN	6.0,1.0,2.0,1.0,25.0,27.0,9.0,4.0,0.0,0.0,0.0,0.0,3.0,0.0,0.0,1.0,0.0,0.0,0.0,0.0,3.0,2.0,4.0,30.0,4.0,3.0,3.0,3.0,0.0,0.0,0.0,0.0,0.0,1.0,5.0,6.0,0.0,0.0,6.0,4.0,0.0,0.0,1.0,2.0
IFNA_FELCA Interferon alpha OS=Felis catus PE=2 SV=1	K05414	UNKNOWN	0.0,0.0,0.0,0.0,0.0,0.0,0.0,1.0,0.0,0.0,0.0,0.0,0.0,0.0,0.0,0.0,0.0,0.0,0.0,0.0,0.0,0.0,0.0,0.0,0.0,0.0,0.0,0.0,0.0,0.0,0.0,0.0,0.0,0.0,0.0,0.0,0.0,0.0,0.0,0.0,0.0,0.0,0.0,0.0
K2C78_BOVIN Keratin, type II cytoskeletal 78 OS=Bos taurus GN=KRT78 PE=2 SV=1	K07605	UNKNOWN	1.0,1.0,0.0,4.0,2.0,0.0,0.0,0.0,0.0,0.0,6.0,0.0,0.0,5.0,0.0,0.0,0.0,0.0,0.0,0.0,0.0,0.0,0.0,0.0,0.0,1.0,0.0,6.0,0.0,0.0,4.0,2.0,0.0,3.0,13.0,14.0,10.0,6.0,0.0,0.0,8.0,4.0,33.0,0.0
MG: Thymidine kinase OS=Listeria monocytogenes serovar 1/2a (strain ATCC BAA-679 / EGD-e) GN=tdk PE=3 SV=1 [Q8Y4A7] Score: 235.0	K00857	2.7.1.21	0.0,0.0,0.0,0.0,0.0,0.0,0.0,0.0,0.0,0.0,0.0,0.0,1.0,1.0,0.0,0.0,0.0,0.0,0.0,0.0,0.0,0.0,0.0,0.0,0.0,0.0,0.0,0.0,0.0,0.0,0.0,0.0,0.0,0.0,0.0,0.0,0.0,0.0,0.0,0.0,0.0,0.0,0.0,0.0
MG: UPF0214 protein YfeW OS=Escherichia coli O157:H7 GN=yfeW PE=3 SV=1 [Q8XBJ0] Score: 176.0	UNKNOWN	UNKNOWN	1.0,0.0,0.0,0.0,0.0,0.0,0.0,0.0,0.0,0.0,0.0,0.0,0.0,0.0,0.0,0.0,0.0,0.0,0.0,0.0,0.0,0.0,0.0,0.0,0.0,0.0,0.0,0.0,0.0,0.0,0.0,0.0,0.0,0.0,0.0,0.0,0.0,0.0,0.0,0.0,0.0,0.0,0.0,0.0
SUCC_FLAJ1 Succinyl-CoA ligase [ADP-forming] subunit beta OS=Flavobacterium johnsoniae (strain ATCC 17061 / DSM 2064 / UW101) GN=sucC PE=3 SV=1	K01903	6.2.1.5	0.0,0.0,0.0,0.0,0.0,0.0,0.0,0.0,0.0,0.0,0.0,0.0,0.0,0.0,0.0,0.0,0.0,0.0,0.0,0.0,0.0,0.0,0.0,0.0,0.0,0.0,0.0,0.0,0.0,0.0,0.0,0.0,0.0,0.0,0.0,0.0,0.0,1.0,0.0,0.0,0.0,0.0,0.0,0.0
ATPD_HUMAN ATP synthase subunit delta, mitochondrial OS=Homo sapiens GN=ATP5D PE=1 SV=2	K02134	UNKNOWN	0.0,0.0,0.0,0.0,0.0,0.0,0.0,0.0,0.0,0.0,0.0,0.0,4.0,2.0,4.0,5.0,2.0,3.0,6.0,4.0,0.0,0.0,1.0,0.0,5.0,5.0,3.0,5.0,6.0,4.0,0.0,5.0,3.0,0.0,0.0,0.0,2.0,3.0,0.0,0.0,0.0,0.0,0.0,0.0
MG: 1,2-phenylacetyl-CoA epoxidase, subunit E OS=Escherichia coli (strain K12) GN=paaE PE=1 SV=1 [P76081] Score: 121.0	K02613	1.-.-.-	0.0,0.0,0.0,0.0,1.0,0.0,0.0,1.0,0.0,0.0,0.0,0.0,0.0,0.0,0.0,0.0,0.0,0.0,0.0,0.0,0.0,0.0,0.0,0.0,0.0,0.0,0.0,0.0,0.0,0.0,0.0,0.0,0.0,0.0,0.0,0.0,0.0,0.0,0.0,0.0,0.0,0.0,0.0,0.0
MG: Lactate utilization protein A OS=Oceanobacillus iheyensis (strain DSM 14371 / JCM 11309 / KCTC 3954 / HTE831) GN=lutA PE=3 SV=1 [Q8ET92] Score: 238.0	UNKNOWN	UNKNOWN	0.0,0.0,0.0,0.0,0.0,0.0,0.0,0.0,0.0,0.0,0.0,0.0,0.0,0.0,0.0,0.0,0.0,0.0,0.0,0.0,0.0,0.0,0.0,0.0,2.0,2.0,3.0,0.0,0.0,0.0,0.0,0.0,0.0,0.0,1.0,0.0,0.0,0.0,0.0,0.0,0.0,0.0,0.0,0.0
NUSB_RALSO N utilization substance protein B homolog OS=Ralstonia solanacearum (strain GMI1000) GN=nusB PE=3 SV=2	K03625	UNKNOWN	0.0,0.0,0.0,0.0,0.0,0.0,0.0,0.0,0.0,0.0,0.0,0.0,0.0,0.0,0.0,0.0,0.0,0.0,0.0,1.0,0.0,0.0,0.0,0.0,0.0,0.0,0.0,0.0,0.0,0.0,0.0,0.0,0.0,0.0,0.0,0.0,0.0,0.0,0.0,0.0,0.0,0.0,0.0,0.0
KIN17_MOUSE DNA/RNA-binding protein KIN17 OS=Mus musculus GN=Kin PE=1 SV=1	K13102	UNKNOWN	0.0,0.0,0.0,0.0,0.0,0.0,0.0,0.0,0.0,0.0,0.0,0.0,0.0,0.0,0.0,0.0,0.0,0.0,0.0,0.0,0.0,0.0,0.0,0.0,0.0,0.0,0.0,0.0,0.0,0.0,0.0,1.0,0.0,0.0,0.0,0.0,0.0,0.0,0.0,0.0,0.0,0.0,0.0,0.0
MG: Leucine-rich repeat-containing G-protein coupled receptor 5 OS=Bos taurus GN=LGR5 PE=3 SV=2 [F1MT22] Score: 107.0	UNKNOWN	UNKNOWN	0.0,0.0,0.0,0.0,0.0,0.0,0.0,0.0,0.0,0.0,0.0,0.0,0.0,0.0,0.0,0.0,0.0,0.0,5.0,0.0,0.0,0.0,0.0,0.0,0.0,0.0,0.0,0.0,0.0,0.0,0.0,0.0,0.0,0.0,0.0,0.0,0.0,0.0,0.0,0.0,0.0,0.0,0.0,0.0
MG: Pyruvate kinase OS=Geobacillus stearothermophilus GN=pyk PE=1 SV=2 [Q02499] Score: 517.0	UNKNOWN	2.7.1.40	0.0,0.0,0.0,0.0,0.0,0.0,0.0,0.0,0.0,0.0,0.0,1.0,0.0,0.0,0.0,0.0,0.0,0.0,0.0,0.0,0.0,1.0,0.0,0.0,0.0,0.0,0.0,0.0,0.0,1.0,0.0,1.0,0.0,0.0,0.0,0.0,0.0,0.0,0.0,0.0,0.0,0.0,3.0,0.0
SERC_LEPIN Phosphoserine aminotransferase OS=Leptospira interrogans serogroup Icterohaemorrhagiae serovar Lai (strain 56601) GN=serC PE=3 SV=2	UNKNOWN	2.6.1.52	0.0,0.0,0.0,0.0,0.0,0.0,0.0,0.0,0.0,0.0,0.0,0.0,0.0,0.0,0.0,0.0,0.0,0.0,0.0,1.0,0.0,0.0,0.0,0.0,0.0,0.0,0.0,0.0,0.0,0.0,0.0,0.0,0.0,0.0,0.0,0.0,0.0,0.0,0.0,0.0,0.0,0.0,0.0,0.0
THF1_PROM4 Protein Thf1 OS=Prochlorococcus marinus (strain MIT 9211) GN=thf1 PE=3 SV=1	UNKNOWN	UNKNOWN	0.0,0.0,0.0,0.0,0.0,0.0,0.0,0.0,1.0,0.0,0.0,0.0,0.0,0.0,0.0,1.0,0.0,0.0,1.0,1.0,0.0,0.0,0.0,0.0,0.0,0.0,0.0,0.0,0.0,0.0,0.0,0.0,0.0,0.0,0.0,0.0,0.0,0.0,0.0,0.0,0.0,0.0,0.0,0.0
RL5_SULMW 50S ribosomal protein L5 OS=Sulcia muelleri (strain GWSS) GN=rplE PE=3 SV=1	K02931	UNKNOWN	1.0,0.0,4.0,1.0,7.0,4.0,3.0,5.0,0.0,0.0,0.0,0.0,0.0,0.0,0.0,0.0,0.0,0.0,0.0,0.0,1.0,0.0,0.0,0.0,2.0,1.0,0.0,0.0,0.0,0.0,0.0,0.0,0.0,0.0,0.0,0.0,1.0,0.0,1.0,0.0,1.0,0.0,1.0,0.0
CBPC3_MOUSE Cytosolic carboxypeptidase 3 OS=Mus musculus GN=Agbl3 PE=1 SV=1	UNKNOWN	3.4.17.-	0.0,0.0,0.0,0.0,0.0,0.0,0.0,0.0,0.0,0.0,0.0,0.0,0.0,0.0,0.0,0.0,0.0,0.0,0.0,0.0,0.0,0.0,0.0,0.0,0.0,0.0,0.0,0.0,0.0,0.0,0.0,0.0,0.0,0.0,0.0,1.0,0.0,0.0,0.0,0.0,0.0,0.0,0.0,0.0
MG: DNA repair protein RecO OS=Clostridium thermocellum (strain ATCC 27405 / DSM 1237 / NBRC 103400 / NCIMB 10682 / NRRL B-4536 / VPI 7372) GN=recO PE=3 SV=1 [A3DEB9] Score: 117.0	K03584	UNKNOWN	0.0,0.0,0.0,0.0,0.0,0.0,0.0,0.0,0.0,0.0,0.0,0.0,0.0,0.0,0.0,0.0,0.0,0.0,0.0,0.0,0.0,0.0,0.0,0.0,0.0,0.0,0.0,0.0,0.0,0.0,0.0,0.0,0.0,0.0,0.0,0.0,1.0,0.0,0.0,0.0,0.0,1.0,0.0,0.0
MG: UDP-N-acetylmuramoylalanine--D-glutamate ligase OS=Gramella forsetii (strain KT0803) GN=murD PE=3 SV=1 [A0M529] Score: 488.0	K01925	6.3.2.9	0.0,0.0,0.0,0.0,0.0,0.0,0.0,0.0,0.0,0.0,0.0,0.0,0.0,0.0,0.0,0.0,1.0,0.0,0.0,0.0,0.0,0.0,0.0,0.0,0.0,0.0,0.0,0.0,0.0,0.0,0.0,0.0,0.0,1.0,0.0,0.0,0.0,0.0,0.0,0.0,0.0,0.0,0.0,0.0
MG: UPF0051 protein MTH1150 homolog OS=Methanothermobacter thermoautotrophicus (strain Winter) PE=3 SV=1 [Q50519] Score: 489.0	UNKNOWN	UNKNOWN	1.0,0.0,0.0,0.0,2.0,9.0,6.0,3.0,2.0,5.0,1.0,0.0,0.0,0.0,0.0,0.0,0.0,0.0,0.0,0.0,0.0,0.0,0.0,0.0,0.0,0.0,0.0,0.0,0.0,0.0,0.0,0.0,0.0,0.0,0.0,0.0,0.0,0.0,0.0,0.0,0.0,0.0,0.0,0.0
ACYP_UNCMA Acylphosphatase OS=Uncultured methanogenic archaeon RC-I GN=acyP PE=3 SV=1	K01512	3.6.1.7	0.0,0.0,0.0,0.0,0.0,0.0,0.0,0.0,1.0,0.0,0.0,0.0,0.0,0.0,0.0,0.0,0.0,0.0,0.0,0.0,0.0,0.0,0.0,0.0,0.0,0.0,0.0,0.0,0.0,0.0,0.0,0.0,0.0,0.0,0.0,0.0,0.0,0.0,0.0,0.0,0.0,0.0,0.0,0.0
MURI_THET2 Glutamate racemase OS=Thermus thermophilus (strain HB27 / ATCC BAA-163 / DSM 7039) GN=murI PE=3 SV=1	K01776	5.1.1.3	0.0,0.0,0.0,0.0,0.0,0.0,0.0,0.0,0.0,0.0,0.0,0.0,0.0,0.0,0.0,0.0,0.0,0.0,0.0,0.0,1.0,0.0,0.0,0.0,0.0,0.0,0.0,0.0,0.0,0.0,0.0,0.0,0.0,0.0,0.0,0.0,0.0,0.0,0.0,0.0,0.0,0.0,0.0,0.0
DRTS_PLABA Bifunctional dihydrofolate reductase-thymidylate synthase OS=Plasmodium berghei (strain Anka) PE=3 SV=1	UNKNOWN	1.5.1.3,2.1.1.45	0.0,0.0,0.0,0.0,0.0,0.0,0.0,0.0,0.0,0.0,0.0,0.0,0.0,0.0,0.0,0.0,0.0,0.0,0.0,0.0,0.0,0.0,0.0,0.0,0.0,0.0,0.0,0.0,0.0,1.0,0.0,0.0,0.0,0.0,0.0,0.0,0.0,0.0,0.0,0.0,0.0,0.0,0.0,0.0
MG: Phosphopantetheine adenylyltransferase OS=Caldicellulosiruptor bescii (strain ATCC BAA-1888 / DSM 6725 / Z-1320) GN=coaD PE=3 SV=1 [B9MRM3] Score: 202.0	K00954	2.7.7.3	0.0,0.0,0.0,0.0,0.0,0.0,0.0,0.0,3.0,3.0,0.0,0.0,0.0,0.0,0.0,0.0,0.0,0.0,0.0,0.0,0.0,0.0,0.0,0.0,2.0,0.0,0.0,0.0,0.0,0.0,0.0,0.0,0.0,0.0,0.0,0.0,0.0,0.0,0.0,0.0,0.0,0.0,0.0,0.0
MG: Cell division protein DivIVA OS=Streptococcus pneumoniae (strain ATCC BAA-255 / R6) GN=divIVA PE=1 SV=2 [Q8CWP9] Score: 272.0	K04074	UNKNOWN	0.0,0.0,1.0,0.0,0.0,0.0,0.0,0.0,0.0,0.0,0.0,0.0,0.0,0.0,0.0,0.0,0.0,0.0,0.0,0.0,0.0,0.0,0.0,0.0,0.0,0.0,0.0,0.0,0.0,0.0,0.0,0.0,0.0,0.0,0.0,0.0,0.0,0.0,2.0,2.0,0.0,0.0,0.0,0.0
MG: Chaperone protein HtpG OS=Pelobacter propionicus (strain DSM 2379) GN=htpG PE=3 SV=1 [A1ANS1] Score: 553.0	K04079	UNKNOWN	0.0,0.0,0.0,0.0,0.0,0.0,0.0,0.0,0.0,0.0,1.0,0.0,0.0,0.0,0.0,0.0,0.0,0.0,0.0,0.0,0.0,0.0,0.0,0.0,0.0,0.0,0.0,0.0,0.0,0.0,0.0,0.0,0.0,0.0,0.0,0.0,0.0,0.0,0.0,0.0,0.0,0.0,2.0,0.0
CO1A1_MAMAE Collagen alpha-1(I) chain OS=Mammut americanum GN=COL1A1 PE=1 SV=4	UNKNOWN	UNKNOWN	0.0,0.0,0.0,0.0,0.0,0.0,0.0,0.0,0.0,0.0,0.0,0.0,0.0,0.0,0.0,0.0,0.0,0.0,0.0,0.0,0.0,0.0,0.0,1.0,0.0,0.0,0.0,0.0,0.0,0.0,0.0,0.0,1.0,0.0,1.0,0.0,0.0,0.0,0.0,0.0,0.0,0.0,14.0,0.0
SECB_BARBK Protein-export protein SecB OS=Bartonella bacilliformis (strain ATCC 35685 / KC583) GN=secB PE=3 SV=1	K03071	UNKNOWN	0.0,0.0,0.0,0.0,0.0,0.0,11.0,0.0,0.0,0.0,0.0,0.0,0.0,0.0,0.0,0.0,0.0,0.0,0.0,0.0,0.0,0.0,0.0,0.0,0.0,0.0,0.0,0.0,0.0,0.0,0.0,0.0,0.0,0.0,0.0,0.0,0.0,0.0,0.0,0.0,0.0,0.0,0.0,0.0
RSMH_COREF Ribosomal RNA small subunit methyltransferase H OS=Corynebacterium efficiens (strain DSM 44549 / YS-314 / AJ 12310 / JCM 11189 / NBRC 100395) GN=rsmH PE=3 SV=1	K03438	2.1.1.199	0.0,0.0,0.0,0.0,0.0,0.0,0.0,0.0,0.0,0.0,0.0,0.0,0.0,0.0,0.0,0.0,0.0,0.0,0.0,0.0,0.0,0.0,0.0,0.0,1.0,0.0,0.0,0.0,0.0,0.0,0.0,0.0,0.0,0.0,0.0,0.0,0.0,0.0,0.0,0.0,0.0,0.0,0.0,0.0
MG: Uncharacterized N-acetyltransferase STK_02580 OS=Sulfolobus tokodaii (strain DSM 16993 / JCM 10545 / NBRC 100140 / 7) GN=STK_02580 PE=3 SV=1 [Q976C3] Score: 46.6	K03789	2.3.1.-	0.0,0.0,0.0,0.0,0.0,0.0,0.0,0.0,0.0,0.0,0.0,0.0,0.0,1.0,0.0,0.0,0.0,1.0,0.0,1.0,0.0,0.0,0.0,0.0,0.0,0.0,0.0,0.0,0.0,0.0,0.0,0.0,0.0,0.0,0.0,0.0,0.0,0.0,0.0,0.0,0.0,0.0,0.0,0.0
ALYA_KLEPN Alginate lyase OS=Klebsiella pneumoniae GN=alyA PE=1 SV=1	UNKNOWN	4.2.2.3	0.0,0.0,0.0,0.0,0.0,0.0,0.0,0.0,0.0,0.0,0.0,0.0,0.0,0.0,0.0,0.0,0.0,0.0,0.0,0.0,0.0,0.0,0.0,0.0,0.0,0.0,0.0,0.0,0.0,0.0,0.0,0.0,1.0,0.0,0.0,0.0,0.0,0.0,0.0,0.0,0.0,0.0,0.0,0.0
MG: Uncharacterized protein MTBMA_p00010 OS=Methanothermobacter marburgensis (strain DSM 2133 / 14651 / NBRC 100331 / OCM 82 / Marburg) GN=MTBMA_p00010 PE=4 SV=2 [P14932] Score: 73.6	UNKNOWN	UNKNOWN	0.0,0.0,0.0,0.0,0.0,0.0,0.0,0.0,0.0,0.0,0.0,0.0,0.0,0.0,0.0,0.0,0.0,0.0,0.0,0.0,0.0,0.0,0.0,0.0,0.0,0.0,0.0,0.0,0.0,0.0,0.0,0.0,0.0,0.0,2.0,1.0,0.0,0.0,0.0,0.0,0.0,0.0,0.0,0.0
MG: Imidazolonepropionase OS=Nocardioides sp. (strain BAA-499 / JS614) GN=hutI PE=3 SV=1 [A1SPZ7] Score: 67.0	K01468	3.5.2.7	0.0,0.0,0.0,0.0,0.0,0.0,0.0,0.0,0.0,0.0,0.0,0.0,0.0,0.0,0.0,1.0,0.0,0.0,0.0,0.0,0.0,0.0,0.0,0.0,0.0,0.0,0.0,0.0,0.0,0.0,0.0,0.0,0.0,0.0,0.0,0.0,0.0,0.0,0.0,0.0,0.0,0.0,0.0,0.0
ILVA_PASMU L-threonine dehydratase biosynthetic IlvA OS=Pasteurella multocida (strain Pm70) GN=ilvA PE=3 SV=1	K01754	4.3.1.19	0.0,0.0,0.0,0.0,0.0,0.0,0.0,0.0,0.0,0.0,0.0,0.0,0.0,0.0,0.0,0.0,0.0,0.0,0.0,0.0,0.0,0.0,0.0,0.0,0.0,0.0,0.0,0.0,0.0,0.0,0.0,0.0,0.0,0.0,0.0,0.0,0.0,0.0,0.0,0.0,0.0,0.0,1.0,0.0
MG: Uncharacterized ABC transporter ATP-binding protein YfiL OS=Bacillus subtilis (strain 168) GN=yfiL PE=3 SV=2 [P94440] Score: 145.0	K01990	UNKNOWN	6.0,2.0,0.0,1.0,14.0,23.0,18.0,7.0,6.0,7.0,7.0,10.0,24.0,49.0,47.0,6.0,43.0,37.0,19.0,13.0,6.0,1.0,0.0,5.0,5.0,13.0,9.0,9.0,16.0,16.0,9.0,4.0,22.0,12.0,21.0,7.0,15.0,16.0,13.0,8.0,0.0,1.0,0.0,4.0
EFGC_PEA Elongation factor G, chloroplastic (Fragment) OS=Pisum sativum GN=fusA PE=1 SV=2	UNKNOWN	UNKNOWN	0.0,0.0,0.0,0.0,0.0,0.0,0.0,0.0,0.0,0.0,0.0,0.0,1.0,2.0,2.0,0.0,0.0,0.0,0.0,0.0,0.0,0.0,0.0,1.0,0.0,0.0,0.0,0.0,0.0,0.0,0.0,0.0,0.0,0.0,0.0,0.0,0.0,0.0,2.0,4.0,0.0,0.0,0.0,0.0
MG: Putative pyridoxal phosphate-dependent aminotransferase EpsN OS=Bacillus subtilis (strain 168) GN=epsN PE=2 SV=1 [Q795J3] Score: 427.0	K19430	2.6.1.-	0.0,0.0,0.0,0.0,0.0,0.0,0.0,0.0,0.0,0.0,0.0,0.0,0.0,0.0,0.0,0.0,0.0,0.0,0.0,0.0,0.0,0.0,1.0,0.0,0.0,0.0,0.0,0.0,0.0,0.0,0.0,0.0,0.0,0.0,0.0,0.0,0.0,0.0,0.0,0.0,0.0,0.0,0.0,0.0
DYR_YEAST Dihydrofolate reductase OS=Saccharomyces cerevisiae (strain ATCC 204508 / S288c) GN=DFR1 PE=1 SV=2	K00287	1.5.1.3	0.0,0.0,0.0,0.0,0.0,0.0,0.0,0.0,0.0,0.0,0.0,0.0,4.0,0.0,2.0,0.0,0.0,0.0,0.0,0.0,0.0,0.0,0.0,0.0,0.0,0.0,0.0,0.0,0.0,0.0,0.0,0.0,0.0,0.0,0.0,0.0,0.0,0.0,0.0,0.0,0.0,0.0,0.0,0.0
ECFA1_STAEQ Energy-coupling factor transporter ATP-binding protein EcfA1 OS=Staphylococcus epidermidis (strain ATCC 35984 / RP62A) GN=ecfA1 PE=3 SV=1	K16786	3.6.3.-	0.0,0.0,0.0,0.0,0.0,0.0,0.0,0.0,0.0,0.0,0.0,1.0,0.0,0.0,0.0,0.0,0.0,0.0,0.0,0.0,0.0,0.0,0.0,0.0,0.0,0.0,0.0,0.0,0.0,0.0,1.0,0.0,0.0,0.0,0.0,0.0,0.0,0.0,0.0,0.0,0.0,0.0,0.0,0.0
LDH_THELT L-lactate dehydrogenase OS=Thermotoga lettingae (strain ATCC BAA-301 / DSM 14385 / TMO) GN=ldh PE=3 SV=1	K00016	1.1.1.27	0.0,0.0,0.0,0.0,0.0,0.0,0.0,0.0,0.0,0.0,0.0,0.0,8.0,11.0,8.0,8.0,8.0,7.0,13.0,10.0,0.0,0.0,0.0,0.0,0.0,0.0,0.0,0.0,0.0,0.0,0.0,0.0,0.0,0.0,0.0,0.0,0.0,0.0,0.0,0.0,0.0,0.0,0.0,0.0
C71AE_ARATH Cytochrome P450 71A14 OS=Arabidopsis thaliana GN=CYP71A14 PE=2 SV=1	UNKNOWN	1.14.-.-	0.0,0.0,0.0,0.0,0.0,0.0,0.0,0.0,0.0,0.0,0.0,0.0,0.0,0.0,0.0,0.0,0.0,0.0,0.0,0.0,0.0,1.0,0.0,0.0,0.0,0.0,0.0,0.0,0.0,0.0,0.0,0.0,0.0,0.0,0.0,0.0,0.0,0.0,0.0,0.0,0.0,0.0,0.0,0.0
RS2_COXBR 30S ribosomal protein S2 OS=Coxiella burnetii (strain RSA 331 / Henzerling II) GN=rpsB PE=3 SV=1	K02967	UNKNOWN	0.0,0.0,0.0,0.0,0.0,6.0,6.0,0.0,0.0,0.0,0.0,0.0,1.0,3.0,4.0,1.0,1.0,0.0,1.0,0.0,0.0,0.0,0.0,1.0,0.0,0.0,0.0,2.0,0.0,0.0,0.0,0.0,0.0,0.0,0.0,0.0,1.0,0.0,0.0,0.0,0.0,0.0,0.0,0.0
SYM_YERPB Methionine--tRNA ligase OS=Yersinia pseudotuberculosis serotype IB (strain PB1/+) GN=metG PE=3 SV=1	K01874	6.1.1.10	0.0,0.0,0.0,0.0,0.0,0.0,0.0,0.0,0.0,0.0,0.0,0.0,0.0,0.0,0.0,0.0,0.0,0.0,0.0,0.0,0.0,0.0,0.0,0.0,0.0,0.0,0.0,0.0,0.0,0.0,0.0,0.0,0.0,0.0,0.0,0.0,0.0,0.0,0.0,0.0,0.0,0.0,11.0,0.0
HIS81_DECAR Histidinol-phosphate aminotransferase 1 OS=Dechloromonas aromatica (strain RCB) GN=hisC1 PE=3 SV=1	K00817	2.6.1.9	0.0,0.0,0.0,0.0,0.0,0.0,0.0,0.0,0.0,0.0,0.0,0.0,0.0,1.0,0.0,0.0,0.0,0.0,0.0,0.0,0.0,0.0,0.0,0.0,4.0,3.0,2.0,3.0,0.0,0.0,0.0,0.0,0.0,0.0,0.0,0.0,0.0,0.0,0.0,0.0,0.0,0.0,0.0,0.0
MG: Thermostable monoacylglycerol lipase OS=Bacillus sp. (strain H-257) PE=1 SV=3 [P82597] Score: 88.6	UNKNOWN	3.1.1.23	0.0,0.0,0.0,0.0,0.0,0.0,0.0,0.0,0.0,0.0,0.0,0.0,3.0,7.0,8.0,0.0,4.0,5.0,0.0,2.0,1.0,0.0,0.0,0.0,0.0,0.0,0.0,0.0,0.0,0.0,0.0,0.0,0.0,0.0,0.0,0.0,0.0,0.0,0.0,0.0,0.0,0.0,0.0,0.0
MG: Uncharacterized protein MJ1141 OS=Methanocaldococcus jannaschii (strain ATCC 43067 / DSM 2661 / JAL-1 / JCM 10045 / NBRC 100440) GN=MJ1141 PE=4 SV=1 [Q58541] Score: 73.6	K09729	UNKNOWN	0.0,0.0,0.0,0.0,1.0,0.0,0.0,0.0,0.0,0.0,0.0,0.0,0.0,0.0,0.0,0.0,0.0,1.0,0.0,0.0,0.0,0.0,0.0,0.0,0.0,0.0,0.0,0.0,0.0,0.0,0.0,0.0,0.0,0.0,0.0,0.0,0.0,0.0,0.0,0.0,0.0,0.0,0.0,0.0
MG: Putative transposase y4qE OS=Rhizobium sp. (strain NGR234) GN=NGR_a01930 PE=3 SV=1 [P55626] Score: 382.0	UNKNOWN	UNKNOWN	0.0,0.0,0.0,0.0,0.0,0.0,0.0,0.0,0.0,0.0,0.0,0.0,0.0,0.0,0.0,0.0,0.0,0.0,0.0,0.0,0.0,0.0,0.0,2.0,0.0,0.0,0.0,0.0,0.0,0.0,0.0,0.0,0.0,0.0,0.0,0.0,0.0,0.0,0.0,0.0,0.0,0.0,0.0,0.0
MG: 50S ribosomal protein L10 OS=Bifidobacterium longum subsp. infantis (strain ATCC 15697 / DSM 20088 / JCM 1222 / NCTC 11817 / S12) GN=rplJ PE=3 SV=1 [B7GNG9] Score: 332.0	K02864	UNKNOWN	0.0,0.0,12.0,8.0,0.0,0.0,0.0,0.0,0.0,0.0,0.0,0.0,0.0,1.0,0.0,0.0,0.0,0.0,0.0,0.0,0.0,0.0,0.0,1.0,2.0,0.0,0.0,0.0,0.0,0.0,0.0,0.0,0.0,0.0,0.0,3.0,0.0,0.0,0.0,1.0,0.0,0.0,0.0,0.0
MG: Homoserine O-succinyltransferase OS=Clostridium thermocellum (strain ATCC 27405 / DSM 1237 / NBRC 103400 / NCIMB 10682 / NRRL B-4536 / VPI 7372) GN=metA PE=3 SV=1 [A3DGI7] Score: 421.0	K00651	2.3.1.46	0.0,0.0,0.0,0.0,0.0,0.0,0.0,0.0,0.0,0.0,0.0,0.0,0.0,0.0,0.0,0.0,0.0,0.0,0.0,0.0,0.0,0.0,0.0,0.0,0.0,0.0,1.0,0.0,0.0,0.0,0.0,0.0,0.0,0.0,0.0,0.0,0.0,0.0,0.0,0.0,0.0,0.0,0.0,1.0
MG: Probable enoyl-CoA hydratase OS=Bacillus subtilis (strain 168) GN=fadB PE=2 SV=1 [P94549] Score: 122.0	K13767	4.2.1.17	0.0,0.0,0.0,0.0,0.0,0.0,0.0,0.0,0.0,0.0,0.0,0.0,0.0,0.0,0.0,0.0,0.0,0.0,0.0,0.0,0.0,0.0,2.0,1.0,0.0,0.0,0.0,0.0,0.0,0.0,0.0,0.0,0.0,0.0,0.0,0.0,0.0,0.0,2.0,1.0,0.0,0.0,0.0,0.0
MG: Chaperone protein HtpG OS=Mycobacterium bovis (strain ATCC BAA-935 / AF2122/97) GN=htpG PE=3 SV=1 [P64412] Score: 603.0	K04079	UNKNOWN	0.0,0.0,0.0,0.0,0.0,0.0,0.0,0.0,0.0,0.0,1.0,0.0,0.0,0.0,0.0,0.0,0.0,0.0,0.0,0.0,0.0,0.0,0.0,0.0,0.0,0.0,0.0,0.0,0.0,0.0,0.0,0.0,0.0,0.0,0.0,0.0,0.0,0.0,0.0,0.0,0.0,0.0,0.0,0.0
PYRH_BIFLO Uridylate kinase OS=Bifidobacterium longum (strain NCC 2705) GN=pyrH PE=3 SV=1	K09903	2.7.4.22	0.0,0.0,0.0,2.0,0.0,0.0,0.0,0.0,0.0,0.0,0.0,0.0,0.0,0.0,0.0,1.0,0.0,0.0,0.0,0.0,0.0,0.0,0.0,0.0,0.0,0.0,0.0,0.0,0.0,0.0,0.0,0.0,0.0,0.0,0.0,0.0,0.0,0.0,0.0,0.0,0.0,0.0,0.0,0.0
MG: 60 kDa chaperonin OS=Clostridium cellulolyticum (strain ATCC 35319 / DSM 5812 / JCM 6584 / H10) GN=groL PE=3 SV=1 [B8I5W0] Score: 260.0	K04077	UNKNOWN	70.0,50.0,67.0,51.0,104.0,161.0,903.0,98.0,44.0,60.0,63.0,78.0,293.0,191.0,195.0,140.0,149.0,188.0,177.0,162.0,45.0,62.0,51.0,39.0,64.0,75.0,54.0,38.0,56.0,63.0,31.0,44.0,49.0,60.0,36.0,41.0,32.0,19.0,136.0,117.0,26.0,56.0,57.0,62.0
MG: Probable anion ABC transporter permease protein HVO_1887 OS=Haloferax volcanii (strain ATCC 29605 / DSM 3757 / JCM 8879 / NBRC 14742 / NCIMB 2012 / VKM B-1768 / DS2) GN=HVO_1887 PE=3 SV=1 [D4GSY8] Score: 132.0	K05773	UNKNOWN	0.0,0.0,0.0,0.0,0.0,0.0,0.0,0.0,0.0,0.0,0.0,0.0,0.0,0.0,0.0,0.0,0.0,0.0,0.0,0.0,0.0,0.0,0.0,0.0,0.0,0.0,0.0,1.0,0.0,0.0,0.0,0.0,1.0,0.0,1.0,1.0,0.0,2.0,0.0,0.0,0.0,0.0,0.0,0.0
ARAG_VIBPA Arabinose import ATP-binding protein AraG OS=Vibrio parahaemolyticus serotype O3:K6 (strain RIMD 2210633) GN=araG PE=3 SV=1	K10539	3.6.3.17	0.0,0.0,0.0,0.0,0.0,0.0,0.0,0.0,0.0,0.0,0.0,0.0,0.0,0.0,0.0,0.0,0.0,0.0,0.0,0.0,0.0,0.0,0.0,0.0,0.0,0.0,0.0,0.0,0.0,0.0,0.0,0.0,0.0,0.0,0.0,0.0,0.0,0.0,0.0,1.0,0.0,0.0,0.0,0.0
MG: Uncharacterized protein MTH_793 OS=Methanothermobacter thermautotrophicus (strain ATCC 29096 / DSM 1053 / JCM 10044 / NBRC 100330 / Delta H) GN=MTH_793 PE=4 SV=1 [O26884] Score: 280.0	K00626	UNKNOWN	0.0,0.0,0.0,0.0,0.0,1.0,4.0,0.0,0.0,2.0,0.0,0.0,0.0,0.0,0.0,0.0,0.0,0.0,0.0,0.0,2.0,1.0,0.0,2.0,0.0,1.0,0.0,0.0,0.0,0.0,3.0,0.0,0.0,0.0,0.0,0.0,0.0,0.0,0.0,0.0,0.0,0.0,0.0,0.0
MG: Thymidylate kinase OS=Synechococcus sp. (strain JA-2-3B'a(2-13)) GN=tmk PE=3 SV=1 [Q2JN62] Score: 157.0	K00943	2.7.4.9	0.0,0.0,0.0,0.0,0.0,0.0,0.0,0.0,0.0,0.0,0.0,0.0,1.0,0.0,0.0,0.0,0.0,0.0,0.0,0.0,0.0,0.0,0.0,0.0,0.0,0.0,0.0,0.0,0.0,0.0,0.0,0.0,0.0,0.0,0.0,0.0,0.0,0.0,0.0,0.0,0.0,0.0,0.0,0.0
MG: Glutamate dehydrogenase OS=Aeropyrum pernix (strain ATCC 700893 / DSM 11879 / JCM 9820 / NBRC 100138 / K1) GN=gdhA PE=3 SV=2 [Q9YC65] Score: 195.0	K00261	1.4.1.3	0.0,0.0,0.0,0.0,0.0,0.0,1.0,1.0,0.0,0.0,0.0,0.0,0.0,0.0,0.0,0.0,0.0,0.0,0.0,0.0,0.0,0.0,0.0,0.0,0.0,0.0,0.0,1.0,0.0,0.0,0.0,0.0,0.0,0.0,1.0,0.0,0.0,0.0,0.0,0.0,0.0,0.0,0.0,0.0
MG: Uncharacterized HTH-type transcriptional regulator HI_0659 OS=Haemophilus influenzae (strain ATCC 51907 / DSM 11121 / KW20 / Rd) GN=HI_0659 PE=3 SV=1 [P44030] Score: 41.6	UNKNOWN	UNKNOWN	0.0,0.0,0.0,0.0,0.0,1.0,0.0,0.0,0.0,1.0,1.0,1.0,0.0,0.0,0.0,0.0,0.0,0.0,0.0,0.0,0.0,0.0,0.0,0.0,0.0,0.0,0.0,0.0,0.0,0.0,0.0,0.0,0.0,0.0,0.0,0.0,9.0,0.0,8.0,9.0,0.0,0.0,0.0,0.0
CCG8_MOUSE Voltage-dependent calcium channel gamma-8 subunit OS=Mus musculus GN=Cacng8 PE=1 SV=1	UNKNOWN	UNKNOWN	0.0,0.0,0.0,0.0,0.0,0.0,0.0,0.0,0.0,1.0,0.0,0.0,0.0,0.0,0.0,0.0,0.0,0.0,0.0,0.0,0.0,0.0,0.0,0.0,0.0,0.0,0.0,0.0,0.0,0.0,0.0,0.0,0.0,0.0,0.0,0.0,0.0,0.0,0.0,0.0,0.0,0.0,0.0,0.0
NUON_HYPNA NADH-quinone oxidoreductase subunit N OS=Hyphomonas neptunium (strain ATCC 15444) GN=nuoN PE=3 SV=1	K00343	1.6.5.11	0.0,0.0,0.0,0.0,0.0,0.0,0.0,0.0,0.0,0.0,0.0,0.0,0.0,0.0,0.0,0.0,0.0,0.0,0.0,0.0,0.0,0.0,1.0,0.0,0.0,0.0,0.0,0.0,0.0,0.0,0.0,0.0,0.0,0.0,0.0,0.0,0.0,0.0,0.0,0.0,0.0,0.0,0.0,0.0
HRCA_STRPF Heat-inducible transcription repressor HrcA OS=Streptococcus pyogenes serotype M4 (strain MGAS10750) GN=hrcA PE=3 SV=1	K03705	UNKNOWN	0.0,0.0,0.0,0.0,0.0,0.0,0.0,0.0,0.0,0.0,0.0,0.0,0.0,0.0,0.0,0.0,0.0,0.0,0.0,0.0,0.0,0.0,0.0,0.0,0.0,0.0,0.0,0.0,0.0,0.0,0.0,0.0,0.0,0.0,0.0,0.0,1.0,0.0,0.0,0.0,0.0,0.0,0.0,0.0
DJC27_BOVIN DnaJ homolog subfamily C member 27 OS=Bos taurus GN=DNAJC27 PE=2 SV=1	K19372	UNKNOWN	0.0,0.0,0.0,0.0,0.0,0.0,0.0,0.0,0.0,0.0,0.0,0.0,0.0,0.0,0.0,0.0,0.0,0.0,0.0,0.0,0.0,0.0,0.0,0.0,0.0,0.0,1.0,0.0,0.0,0.0,0.0,0.0,0.0,0.0,0.0,0.0,0.0,0.0,0.0,0.0,0.0,0.0,0.0,0.0
RPOC_BLOPB DNA-directed RNA polymerase subunit beta OS=Blochmannia pennsylvanicus (strain BPEN) GN=rpoC PE=3 SV=1	K03046	2.7.7.6	1.0,0.0,3.0,0.0,1.0,1.0,6.0,1.0,1.0,0.0,0.0,0.0,3.0,0.0,5.0,5.0,1.0,0.0,0.0,0.0,0.0,0.0,0.0,0.0,1.0,0.0,0.0,0.0,0.0,0.0,0.0,0.0,0.0,0.0,0.0,3.0,2.0,2.0,0.0,0.0,0.0,0.0,34.0,2.0
MG: N,N'-diacetyllegionaminic acid synthase OS=Campylobacter jejuni subsp. jejuni serotype O:2 (strain NCTC 11168) GN=legI PE=1 SV=1 [Q0P8T1] Score: 297.0	K18430	2.5.1.101	0.0,0.0,0.0,0.0,0.0,0.0,0.0,0.0,0.0,4.0,1.0,2.0,3.0,4.0,1.0,1.0,4.0,3.0,1.0,0.0,1.0,3.0,0.0,0.0,0.0,0.0,0.0,0.0,1.0,0.0,0.0,1.0,1.0,2.0,0.0,1.0,0.0,3.0,1.0,0.0,0.0,0.0,0.0,0.0
MG: Putative alpha-amylase OS=Methanocaldococcus jannaschii (strain ATCC 43067 / DSM 2661 / JAL-1 / JCM 10045 / NBRC 100440) GN=MJ1611 PE=3 SV=1 [Q59006] Score: 165.0	K07405	3.2.1.1	0.0,0.0,0.0,0.0,0.0,0.0,0.0,0.0,0.0,0.0,0.0,0.0,0.0,0.0,1.0,0.0,0.0,0.0,0.0,0.0,0.0,0.0,0.0,1.0,0.0,0.0,0.0,0.0,5.0,3.0,2.0,3.0,2.0,2.0,0.0,0.0,0.0,0.0,1.0,0.0,0.0,0.0,0.0,0.0
BFR_NITWI Bacterioferritin (Fragment) OS=Nitrobacter winogradskyi GN=bfr PE=1 SV=1	UNKNOWN	1.16.3.1	0.0,0.0,0.0,0.0,0.0,0.0,0.0,0.0,0.0,0.0,0.0,0.0,0.0,0.0,0.0,0.0,0.0,0.0,0.0,0.0,0.0,0.0,0.0,0.0,0.0,0.0,0.0,0.0,0.0,0.0,0.0,0.0,0.0,0.0,0.0,0.0,0.0,0.0,0.0,1.0,0.0,0.0,0.0,0.0
MG: Pyruvate synthase subunit PorC OS=Methanothermobacter marburgensis (strain DSM 2133 / 14651 / NBRC 100331 / OCM 82 / Marburg) GN=porC PE=1 SV=2 [P80902] Score: 173.0	UNKNOWN	1.2.7.1	4.0,1.0,0.0,1.0,25.0,33.0,37.0,23.0,17.0,9.0,18.0,22.0,47.0,34.0,28.0,11.0,28.0,25.0,8.0,21.0,3.0,9.0,11.0,0.0,29.0,13.0,12.0,8.0,26.0,10.0,8.0,19.0,5.0,5.0,17.0,6.0,10.0,9.0,24.0,28.0,4.0,5.0,3.0,6.0
MTNB_BOTFB Methylthioribulose-1-phosphate dehydratase OS=Botryotinia fuckeliana (strain B05.10) GN=mde1 PE=3 SV=1	K08964	4.2.1.109	0.0,0.0,0.0,0.0,0.0,0.0,0.0,0.0,0.0,0.0,0.0,0.0,0.0,0.0,0.0,0.0,0.0,0.0,0.0,0.0,0.0,0.0,0.0,0.0,0.0,0.0,1.0,0.0,0.0,0.0,0.0,0.0,0.0,0.0,0.0,0.0,0.0,0.0,0.0,0.0,0.0,0.0,0.0,0.0
CITD_LACLA Citrate lyase acyl carrier protein OS=Lactococcus lactis subsp. lactis (strain IL1403) GN=citD PE=3 SV=1	K01646	UNKNOWN	0.0,0.0,0.0,0.0,0.0,0.0,0.0,1.0,0.0,0.0,0.0,0.0,0.0,0.0,0.0,0.0,0.0,0.0,0.0,0.0,1.0,1.0,2.0,2.0,0.0,0.0,0.0,0.0,3.0,2.0,0.0,1.0,0.0,0.0,0.0,0.0,0.0,0.0,0.0,0.0,0.0,0.0,0.0,0.0
PSTOM_PYRHO Stomatin homolog PH1511 OS=Pyrococcus horikoshii (strain ATCC 700860 / DSM 12428 / JCM 9974 / NBRC 100139 / OT-3) GN=PH1511 PE=1 SV=1	UNKNOWN	UNKNOWN	0.0,0.0,0.0,0.0,0.0,0.0,0.0,0.0,3.0,4.0,4.0,6.0,0.0,1.0,0.0,0.0,1.0,0.0,0.0,0.0,2.0,0.0,0.0,0.0,0.0,2.0,2.0,3.0,0.0,0.0,0.0,0.0,0.0,0.0,0.0,0.0,1.0,1.0,2.0,1.0,0.0,0.0,0.0,0.0
RL27_PELPD 50S ribosomal protein L27 OS=Pelobacter propionicus (strain DSM 2379) GN=rpmA PE=3 SV=1	K02899	UNKNOWN	0.0,0.0,0.0,0.0,0.0,0.0,0.0,1.0,0.0,0.0,0.0,0.0,1.0,1.0,0.0,0.0,1.0,0.0,0.0,0.0,0.0,0.0,0.0,0.0,0.0,0.0,0.0,0.0,0.0,0.0,0.0,0.0,0.0,0.0,0.0,0.0,0.0,0.0,0.0,0.0,0.0,0.0,0.0,0.0
YKOD_BACSU Putative HMP/thiamine import ATP-binding protein YkoD OS=Bacillus subtilis (strain 168) GN=ykoD PE=1 SV=2	K16787,K16786	3.6.3.-	0.0,0.0,0.0,0.0,0.0,0.0,0.0,0.0,0.0,0.0,0.0,0.0,0.0,0.0,0.0,0.0,0.0,0.0,0.0,0.0,0.0,0.0,1.0,0.0,0.0,0.0,0.0,0.0,0.0,0.0,0.0,0.0,0.0,0.0,0.0,0.0,0.0,0.0,1.0,0.0,0.0,0.0,0.0,0.0
K2C80_HUMAN Keratin, type II cytoskeletal 80 OS=Homo sapiens GN=KRT80 PE=1 SV=2	K07605	UNKNOWN	0.0,0.0,0.0,0.0,0.0,0.0,0.0,0.0,0.0,0.0,0.0,0.0,0.0,0.0,0.0,0.0,0.0,0.0,0.0,0.0,2.0,0.0,2.0,0.0,16.0,48.0,39.0,60.0,58.0,47.0,13.0,41.0,46.0,29.0,24.0,17.0,0.0,1.0,43.0,48.0,2.0,3.0,9.0,22.0
MG: Titin OS=Mus musculus GN=Ttn PE=1 SV=1 [A2ASS6] Score: 56.6	UNKNOWN	2.7.11.1	0.0,0.0,1.0,0.0,0.0,0.0,0.0,0.0,0.0,0.0,0.0,0.0,0.0,0.0,0.0,0.0,0.0,0.0,0.0,0.0,10.0,16.0,8.0,13.0,0.0,0.0,0.0,0.0,0.0,0.0,1.0,1.0,0.0,0.0,0.0,0.0,0.0,0.0,0.0,0.0,0.0,0.0,0.0,0.0
MG: RNA polymerase sigma factor SigK OS=Mycobacterium sp. (strain MCS) GN=sigK PE=3 SV=1 [Q1B3Q8] Score: 76.6	K03088	UNKNOWN	0.0,0.0,0.0,0.0,0.0,0.0,0.0,0.0,0.0,0.0,0.0,0.0,0.0,0.0,0.0,0.0,0.0,0.0,0.0,0.0,1.0,0.0,0.0,0.0,0.0,0.0,0.0,0.0,0.0,0.0,0.0,0.0,0.0,0.0,0.0,0.0,0.0,0.0,0.0,0.0,0.0,0.0,0.0,0.0
MG: Internalin-J OS=Listeria monocytogenes serovar 1/2a (strain ATCC BAA-679 / EGD-e) GN=inlJ PE=1 SV=1 [Q8Y3L4] Score: 149.0	UNKNOWN	UNKNOWN	0.0,0.0,0.0,0.0,0.0,0.0,0.0,0.0,0.0,0.0,0.0,0.0,0.0,0.0,0.0,0.0,0.0,0.0,0.0,0.0,0.0,0.0,0.0,0.0,0.0,0.0,1.0,0.0,0.0,0.0,0.0,0.0,0.0,0.0,0.0,0.0,1.0,0.0,0.0,0.0,0.0,0.0,0.0,0.0
MG: Phosphoribosylaminoimidazole-succinocarboxamide synthase OS=Lactobacillus fermentum (strain NBRC 3956 / LMG 18251) GN=purC PE=3 SV=1 [B2GF71] Score: 353.0	K01923	6.3.2.6	0.0,0.0,2.0,0.0,0.0,0.0,0.0,0.0,0.0,0.0,0.0,0.0,0.0,0.0,0.0,0.0,0.0,0.0,0.0,0.0,0.0,0.0,0.0,0.0,0.0,0.0,0.0,0.0,0.0,0.0,0.0,0.0,0.0,0.0,0.0,0.0,0.0,0.0,2.0,2.0,0.0,0.0,0.0,0.0
MG: Probable endopeptidase YddH OS=Bacillus subtilis (strain 168) GN=yddH PE=3 SV=1 [P96645] Score: 90.9	UNKNOWN	3.4.-.-	0.0,0.0,0.0,0.0,0.0,0.0,0.0,0.0,0.0,0.0,0.0,0.0,0.0,0.0,0.0,0.0,0.0,0.0,0.0,0.0,0.0,1.0,0.0,0.0,0.0,0.0,0.0,0.0,0.0,0.0,0.0,0.0,0.0,0.0,0.0,0.0,0.0,0.0,0.0,0.0,0.0,0.0,0.0,0.0
MG: Endoglucanase Z OS=Clostridium stercorarium GN=celZ PE=1 SV=1 [P23659] Score: 379.0	UNKNOWN	3.2.1.4	0.0,0.0,0.0,1.0,0.0,0.0,0.0,2.0,0.0,0.0,0.0,0.0,0.0,0.0,0.0,0.0,0.0,0.0,0.0,0.0,0.0,0.0,0.0,0.0,0.0,0.0,0.0,0.0,0.0,0.0,0.0,0.0,0.0,0.0,0.0,0.0,1.0,0.0,0.0,0.0,0.0,0.0,0.0,0.0
RS4_MYCGA 30S ribosomal protein S4 OS=Mycoplasma gallisepticum (strain R(low / passage 15 / clone 2)) GN=rpsD PE=3 SV=1	K02986	UNKNOWN	0.0,0.0,0.0,0.0,0.0,1.0,0.0,0.0,0.0,0.0,0.0,0.0,0.0,0.0,0.0,0.0,0.0,0.0,0.0,0.0,0.0,0.0,0.0,0.0,0.0,0.0,0.0,0.0,0.0,0.0,0.0,0.0,0.0,0.0,0.0,0.0,0.0,0.0,0.0,0.0,0.0,0.0,0.0,0.0
MG: Probable cation-transporting ATPase E OS=Mycobacterium bovis (strain ATCC BAA-935 / AF2122/97) GN=ctpE PE=3 SV=1 [P0A505] Score: 817.0	K12952	3.6.3.-	0.0,0.0,0.0,0.0,0.0,0.0,0.0,0.0,0.0,0.0,0.0,0.0,0.0,0.0,0.0,0.0,0.0,0.0,0.0,0.0,0.0,0.0,0.0,0.0,0.0,0.0,0.0,0.0,0.0,0.0,0.0,0.0,0.0,0.0,0.0,0.0,0.0,0.0,0.0,0.0,0.0,0.0,2.0,0.0
ADT2_MOUSE ADP/ATP translocase 2 OS=Mus musculus GN=Slc25a5 PE=1 SV=3	UNKNOWN	UNKNOWN	2.0,0.0,2.0,2.0,8.0,9.0,30.0,43.0,12.0,13.0,8.0,7.0,11.0,7.0,8.0,13.0,14.0,4.0,2.0,3.0,8.0,20.0,12.0,10.0,0.0,0.0,0.0,0.0,4.0,0.0,2.0,1.0,2.0,3.0,3.0,4.0,0.0,1.0,3.0,3.0,0.0,0.0,0.0,0.0
MG: Putative NADH dehydrogenase/NAD(P)H nitroreductase AF_0226 OS=Archaeoglobus fulgidus (strain ATCC 49558 / VC-16 / DSM 4304 / JCM 9628 / NBRC 100126) GN=AF_0226 PE=3 SV=1 [O30013] Score: 90.5	UNKNOWN	1.-.-.-	8.0,2.0,9.0,1.0,24.0,13.0,14.0,24.0,17.0,15.0,19.0,15.0,27.0,32.0,40.0,35.0,46.0,17.0,23.0,41.0,7.0,3.0,4.0,1.0,55.0,54.0,29.0,22.0,3.0,0.0,1.0,7.0,8.0,10.0,58.0,33.0,10.0,3.0,17.0,24.0,1.0,3.0,2.0,3.0
MG: Uncharacterized peptidase SH1217 OS=Staphylococcus haemolyticus (strain JCSC1435) GN=SH1217 PE=3 SV=1 [Q4L749] Score: 248.0	K01271	3.4.-.-	0.0,0.0,0.0,0.0,0.0,0.0,0.0,0.0,0.0,0.0,0.0,0.0,3.0,5.0,3.0,0.0,4.0,7.0,2.0,1.0,0.0,0.0,0.0,0.0,0.0,0.0,0.0,0.0,0.0,0.0,0.0,0.0,0.0,0.0,0.0,0.0,0.0,0.0,0.0,1.0,0.0,0.0,0.0,0.0
MG: Holo-[acyl-carrier-protein] synthase OS=Desulforudis audaxviator (strain MP104C) GN=acpS PE=3 SV=1 [B1I1U5] Score: 132.0	K00997	2.7.8.7	0.0,0.0,0.0,0.0,0.0,0.0,0.0,0.0,1.0,0.0,0.0,0.0,0.0,0.0,0.0,0.0,0.0,0.0,0.0,0.0,0.0,0.0,0.0,0.0,0.0,0.0,0.0,0.0,0.0,0.0,0.0,0.0,0.0,0.0,0.0,0.0,0.0,0.0,0.0,0.0,0.0,0.0,0.0,0.0
MG: Uncharacterized protein YqaJ OS=Bacillus subtilis (strain 168) GN=yqaJ PE=4 SV=1 [P45907] Score: 223.0	UNKNOWN	UNKNOWN	0.0,0.0,0.0,0.0,0.0,0.0,0.0,0.0,0.0,0.0,1.0,0.0,1.0,1.0,0.0,1.0,0.0,0.0,0.0,0.0,0.0,0.0,0.0,0.0,0.0,0.0,0.0,0.0,0.0,0.0,0.0,0.0,0.0,0.0,0.0,0.0,0.0,0.0,0.0,0.0,0.0,0.0,0.0,0.0
MG: Anaerobic sulfatase-maturating enzyme OS=Clostridium perfringens (strain ATCC 13124 / NCTC 8237 / Type A) GN=CPF_0616 PE=1 SV=1 [Q0TTH1] Score: 160.0	K06871	1.8.98.-	0.0,0.0,1.0,0.0,0.0,0.0,0.0,0.0,0.0,0.0,0.0,0.0,0.0,0.0,0.0,0.0,0.0,0.0,0.0,0.0,0.0,0.0,0.0,1.0,0.0,0.0,0.0,0.0,0.0,0.0,0.0,0.0,0.0,0.0,0.0,0.0,0.0,0.0,0.0,0.0,0.0,0.0,0.0,0.0
MG: Mannosylglycoprotein endo-beta-mannosidase OS=Arabidopsis thaliana GN=EBM PE=1 SV=3 [Q75W54] Score: 287.0	K18577	3.2.1.152	0.0,0.0,0.0,0.0,0.0,0.0,0.0,0.0,0.0,0.0,0.0,0.0,0.0,0.0,0.0,0.0,0.0,0.0,0.0,0.0,0.0,0.0,0.0,0.0,0.0,0.0,0.0,0.0,0.0,0.0,1.0,0.0,0.0,0.0,0.0,0.0,0.0,0.0,0.0,0.0,0.0,0.0,0.0,0.0
MG: Chemotaxis protein methyltransferase OS=Bacillus subtilis (strain 168) GN=cheR PE=3 SV=4 [P31105] Score: 264.0	K00575	2.1.1.80	0.0,0.0,0.0,0.0,0.0,0.0,0.0,0.0,0.0,0.0,0.0,0.0,0.0,0.0,0.0,0.0,0.0,0.0,0.0,0.0,0.0,0.0,0.0,0.0,0.0,0.0,0.0,0.0,0.0,0.0,0.0,0.0,0.0,0.0,0.0,0.0,0.0,0.0,0.0,0.0,0.0,0.0,1.0,0.0
MG: Aspartate carbamoyltransferase regulatory chain OS=Clostridium botulinum (strain Loch Maree / Type A3) GN=pyrI PE=3 SV=1 [B1L1E6] Score: 177.0	K00610	UNKNOWN	0.0,0.0,0.0,0.0,0.0,0.0,0.0,0.0,0.0,0.0,0.0,0.0,0.0,0.0,0.0,0.0,0.0,0.0,0.0,0.0,0.0,0.0,0.0,0.0,0.0,0.0,0.0,0.0,0.0,0.0,0.0,0.0,0.0,0.0,0.0,0.0,0.0,1.0,0.0,0.0,0.0,0.0,0.0,0.0
MG: Bacteriohemerythrin OS=Methanocaldococcus jannaschii (strain ATCC 43067 / DSM 2661 / JAL-1 / JCM 10045 / NBRC 100440) GN=MJ0747 PE=3 SV=2 [Q58157] Score: 73.9	K07216	UNKNOWN	1.0,1.0,0.0,0.0,3.0,3.0,0.0,0.0,3.0,1.0,0.0,2.0,4.0,2.0,3.0,1.0,3.0,5.0,1.0,0.0,0.0,0.0,0.0,1.0,0.0,1.0,1.0,0.0,0.0,0.0,0.0,0.0,0.0,0.0,1.0,0.0,0.0,0.0,0.0,0.0,0.0,0.0,0.0,0.0
MG: Hydroxylamine reductase OS=Escherichia coli (strain UTI89 / UPEC) GN=hcp PE=3 SV=1 [Q1RE52] Score: 586.0	K05601	1.7.99.1	0.0,0.0,0.0,0.0,0.0,0.0,0.0,0.0,0.0,0.0,1.0,2.0,0.0,0.0,0.0,0.0,0.0,0.0,0.0,0.0,17.0,20.0,22.0,10.0,0.0,0.0,0.0,0.0,1.0,0.0,1.0,0.0,0.0,0.0,1.0,0.0,0.0,1.0,0.0,0.0,0.0,0.0,0.0,0.0
IF1_DESRM Translation initiation factor IF-1 OS=Desulfotomaculum reducens (strain MI-1) GN=infA PE=3 SV=1	K02518	UNKNOWN	0.0,0.0,0.0,0.0,1.0,2.0,0.0,0.0,2.0,3.0,1.0,3.0,0.0,0.0,0.0,0.0,0.0,0.0,0.0,0.0,0.0,0.0,0.0,0.0,0.0,2.0,5.0,3.0,0.0,0.0,0.0,0.0,1.0,0.0,0.0,0.0,0.0,0.0,0.0,4.0,0.0,0.0,0.0,2.0
MG: Flagellar biosynthetic protein FlhB OS=Treponema pallidum (strain Nichols) GN=flhB PE=1 SV=1 [O83710] Score: 361.0	K02401	UNKNOWN	0.0,0.0,0.0,0.0,0.0,0.0,0.0,0.0,0.0,0.0,0.0,0.0,0.0,0.0,0.0,0.0,0.0,0.0,0.0,0.0,0.0,0.0,0.0,0.0,0.0,0.0,0.0,0.0,0.0,0.0,0.0,0.0,0.0,0.0,0.0,0.0,0.0,0.0,1.0,0.0,0.0,0.0,0.0,0.0
MG: Shikimate kinase OS=Rhodobacter sphaeroides (strain ATCC 17023 / 2.4.1 / NCIB 8253 / DSM 158) GN=aroK PE=3 SV=2 [Q3J2I9] Score: 143.0	K00891	2.7.1.71	0.0,0.0,0.0,0.0,0.0,0.0,0.0,0.0,0.0,0.0,0.0,0.0,0.0,0.0,1.0,0.0,0.0,0.0,0.0,0.0,0.0,0.0,0.0,0.0,0.0,0.0,0.0,0.0,0.0,0.0,0.0,0.0,0.0,0.0,0.0,0.0,0.0,0.0,0.0,0.0,0.0,0.0,0.0,0.0
PGM2_PARTE Phosphoglucomutase-2 OS=Paramecium tetraurelia GN=pp63-2 PE=2 SV=1	K01835	5.4.2.2	0.0,0.0,0.0,0.0,0.0,0.0,0.0,0.0,0.0,0.0,0.0,0.0,0.0,0.0,0.0,0.0,0.0,0.0,0.0,0.0,0.0,0.0,0.0,0.0,0.0,0.0,0.0,0.0,0.0,0.0,0.0,0.0,0.0,0.0,0.0,0.0,0.0,0.0,0.0,0.0,0.0,0.0,0.0,2.0
MG: DNA polymerase IV 1 OS=Bacillus subtilis (strain 168) GN=dinB1 PE=3 SV=2 [P54545] Score: 275.0	K02346	2.7.7.7	3.0,0.0,0.0,0.0,0.0,1.0,0.0,0.0,0.0,0.0,0.0,0.0,0.0,0.0,0.0,0.0,0.0,0.0,0.0,0.0,0.0,0.0,0.0,0.0,0.0,0.0,0.0,0.0,0.0,0.0,0.0,0.0,0.0,0.0,0.0,0.0,0.0,0.0,0.0,0.0,0.0,0.0,0.0,0.0
MG: Porin-like protein NicP OS=Pseudomonas putida (strain KT2440) GN=nicP PE=2 SV=1 [Q88FY7] Score: 251.0	UNKNOWN	UNKNOWN	0.0,0.0,0.0,1.0,0.0,0.0,0.0,0.0,1.0,0.0,0.0,0.0,0.0,0.0,0.0,0.0,0.0,0.0,0.0,0.0,0.0,0.0,0.0,0.0,0.0,0.0,0.0,0.0,0.0,0.0,0.0,0.0,0.0,0.0,0.0,0.0,0.0,0.0,0.0,0.0,0.0,0.0,0.0,0.0
MG: Anaerobic sulfite reductase subunit A OS=Salmonella typhimurium (strain LT2 / SGSC1412 / ATCC 700720) GN=asrA PE=2 SV=1 [P26474] Score: 270.0	K16950	UNKNOWN	0.0,1.0,0.0,0.0,0.0,0.0,0.0,0.0,0.0,0.0,0.0,0.0,0.0,0.0,0.0,0.0,0.0,0.0,0.0,0.0,0.0,0.0,0.0,0.0,0.0,0.0,0.0,0.0,0.0,0.0,0.0,0.0,0.0,0.0,0.0,0.0,0.0,0.0,0.0,0.0,0.0,0.0,0.0,0.0
MG: NADP-reducing hydrogenase subunit HndA OS=Desulfovibrio fructosivorans GN=hndA PE=1 SV=1 [Q46505] Score: 196.0	UNKNOWN	1.12.1.3	41.0,33.0,12.0,9.0,99.0,103.0,94.0,231.0,71.0,65.0,55.0,59.0,245.0,240.0,283.0,296.0,210.0,186.0,143.0,292.0,186.0,209.0,290.0,171.0,54.0,51.0,45.0,29.0,127.0,97.0,65.0,48.0,17.0,10.0,19.0,15.0,33.0,33.0,129.0,122.0,0.0,3.0,0.0,7.0
MG: Probable signal peptidase I-1 OS=Synechocystis sp. (strain PCC 6803 / Kazusa) GN=lepB1 PE=3 SV=1 [P72660] Score: 104.0	K03100	3.4.21.89	2.0,1.0,0.0,1.0,0.0,0.0,0.0,0.0,0.0,0.0,0.0,0.0,1.0,1.0,1.0,0.0,0.0,0.0,0.0,0.0,0.0,0.0,0.0,0.0,0.0,0.0,0.0,0.0,0.0,0.0,0.0,1.0,0.0,0.0,0.0,0.0,4.0,0.0,0.0,0.0,0.0,0.0,0.0,0.0
DPOL_HHV2H DNA polymerase catalytic subunit OS=Human herpesvirus 2 (strain HG52) GN=UL30 PE=3 SV=1	K18964	3.1.26.4,2.7.7.7	0.0,0.0,0.0,0.0,0.0,0.0,0.0,0.0,0.0,0.0,0.0,0.0,0.0,0.0,0.0,0.0,0.0,0.0,0.0,0.0,0.0,0.0,0.0,0.0,0.0,1.0,0.0,0.0,0.0,0.0,0.0,0.0,0.0,0.0,0.0,0.0,0.0,0.0,0.0,0.0,0.0,0.0,0.0,0.0
MG: Pyridoxamine kinase OS=Deinococcus geothermalis (strain DSM 11300) GN=pdxY PE=3 SV=1 [Q1J237] Score: 78.2	K00868	2.7.1.35	0.0,0.0,0.0,0.0,0.0,0.0,0.0,0.0,0.0,0.0,0.0,0.0,0.0,0.0,0.0,0.0,0.0,0.0,0.0,0.0,0.0,0.0,0.0,0.0,0.0,0.0,0.0,0.0,0.0,0.0,0.0,0.0,0.0,0.0,0.0,0.0,0.0,0.0,1.0,1.0,0.0,1.0,0.0,0.0
MG: CCA-adding enzyme OS=Lactobacillus plantarum (strain ATCC BAA-793 / NCIMB 8826 / WCFS1) GN=cca PE=3 SV=1 [Q88W02] Score: 243.0	K00974	2.7.7.72	0.0,0.0,0.0,0.0,0.0,0.0,0.0,0.0,0.0,0.0,0.0,1.0,0.0,0.0,0.0,1.0,0.0,0.0,0.0,0.0,0.0,0.0,0.0,0.0,0.0,0.0,0.0,0.0,0.0,0.0,0.0,0.0,0.0,0.0,0.0,0.0,0.0,0.0,0.0,0.0,0.0,0.0,0.0,0.0
MG: DNA mismatch repair protein MutL OS=Porphyromonas gingivalis (strain ATCC 33277 / DSM 20709 / JCM 12257) GN=mutL PE=3 SV=1 [B2RL29] Score: 534.0	K03572	UNKNOWN	0.0,0.0,0.0,0.0,0.0,0.0,0.0,0.0,0.0,0.0,0.0,0.0,0.0,0.0,0.0,0.0,0.0,0.0,0.0,0.0,0.0,0.0,0.0,0.0,0.0,1.0,0.0,0.0,0.0,0.0,0.0,0.0,0.0,0.0,0.0,0.0,0.0,0.0,0.0,0.0,0.0,0.0,0.0,0.0
MG: Uncharacterized protein YclG OS=Bacillus subtilis (strain 168) GN=yclG PE=4 SV=1 [P94409] Score: 52.0	UNKNOWN	UNKNOWN	0.0,0.0,0.0,0.0,0.0,0.0,0.0,1.0,0.0,0.0,0.0,0.0,0.0,0.0,0.0,0.0,0.0,0.0,0.0,0.0,0.0,0.0,0.0,0.0,0.0,0.0,0.0,0.0,0.0,0.0,0.0,0.0,0.0,0.0,0.0,0.0,0.0,0.0,0.0,0.0,0.0,0.0,0.0,0.0
RS5_CICAR 40S ribosomal protein S5 (Fragment) OS=Cicer arietinum GN=RPS5 PE=2 SV=1	UNKNOWN	UNKNOWN	0.0,0.0,0.0,0.0,2.0,0.0,0.0,0.0,0.0,0.0,0.0,0.0,0.0,0.0,0.0,0.0,0.0,0.0,0.0,0.0,0.0,0.0,0.0,0.0,0.0,0.0,0.0,0.0,0.0,0.0,0.0,0.0,0.0,0.0,0.0,0.0,0.0,0.0,0.0,0.0,0.0,0.0,0.0,0.0
MG: Valine--tRNA ligase OS=Caldanaerobacter subterraneus subsp. tengcongensis (strain DSM 15242 / JCM 11007 / NBRC 100824 / MB4) GN=valS PE=3 SV=1 [Q8RBN5] Score: 240.0	K01873	6.1.1.9	0.0,0.0,0.0,0.0,0.0,0.0,0.0,0.0,5.0,0.0,0.0,1.0,0.0,3.0,0.0,0.0,1.0,2.0,0.0,0.0,0.0,0.0,0.0,0.0,0.0,0.0,0.0,0.0,0.0,0.0,0.0,0.0,0.0,0.0,0.0,0.0,0.0,0.0,2.0,1.0,0.0,0.0,0.0,0.0
MG: Uncharacterized protein y4rH OS=Rhizobium sp. (strain NGR234) GN=NGR_a01790 PE=3 SV=1 [P55641] Score: 68.6	UNKNOWN	UNKNOWN	0.0,0.0,0.0,0.0,0.0,1.0,0.0,0.0,0.0,0.0,0.0,0.0,1.0,1.0,0.0,0.0,0.0,0.0,0.0,0.0,0.0,0.0,0.0,0.0,0.0,0.0,0.0,0.0,0.0,0.0,0.0,0.0,0.0,0.0,0.0,0.0,0.0,0.0,0.0,0.0,1.0,1.0,0.0,1.0
MCP1_THEMA Methyl-accepting chemotaxis protein 1 OS=Thermotoga maritima (strain ATCC 43589 / MSB8 / DSM 3109 / JCM 10099) GN=mcp1 PE=1 SV=1	K03406	UNKNOWN	5.0,3.0,6.0,10.0,7.0,7.0,3.0,2.0,8.0,6.0,3.0,8.0,151.0,133.0,101.0,66.0,102.0,93.0,68.0,62.0,4.0,5.0,5.0,3.0,8.0,13.0,5.0,6.0,0.0,0.0,0.0,4.0,8.0,5.0,6.0,5.0,0.0,3.0,5.0,4.0,1.0,0.0,2.0,1.0
YJC8_YEAST Uncharacterized protein YJL028W OS=Saccharomyces cerevisiae (strain ATCC 204508 / S288c) GN=YJL028W PE=4 SV=1	UNKNOWN	UNKNOWN	0.0,0.0,0.0,0.0,0.0,0.0,0.0,0.0,0.0,0.0,0.0,0.0,0.0,0.0,0.0,1.0,0.0,0.0,0.0,0.0,0.0,0.0,0.0,0.0,0.0,0.0,0.0,0.0,0.0,0.0,0.0,0.0,0.0,0.0,0.0,0.0,0.0,0.0,0.0,0.0,0.0,0.0,0.0,0.0
KAD2_XENTR Adenylate kinase 2, mitochondrial OS=Xenopus tropicalis GN=ak2 PE=2 SV=1	UNKNOWN	2.7.4.3	0.0,0.0,2.0,0.0,0.0,0.0,0.0,0.0,0.0,0.0,0.0,0.0,0.0,0.0,0.0,0.0,0.0,0.0,0.0,0.0,0.0,0.0,0.0,0.0,0.0,0.0,0.0,0.0,0.0,0.0,0.0,0.0,0.0,0.0,0.0,0.0,0.0,0.0,1.0,1.0,0.0,0.0,4.0,2.0
MG: 30S ribosomal protein S18 OS=Pseudomonas aeruginosa (strain ATCC 15692 / PAO1 / 1C / PRS 101 / LMG 12228) GN=rpsR PE=3 SV=1 [Q9HUN0] Score: 151.0	K02963	UNKNOWN	0.0,0.0,0.0,0.0,0.0,0.0,0.0,0.0,0.0,0.0,0.0,0.0,0.0,0.0,0.0,0.0,0.0,0.0,0.0,0.0,0.0,0.0,0.0,0.0,0.0,0.0,0.0,0.0,0.0,0.0,0.0,0.0,0.0,0.0,0.0,0.0,0.0,0.0,0.0,0.0,0.0,0.0,2.0,0.0
MG: 30S ribosomal protein S1 OS=Staphylococcus aureus (strain Mu50 / ATCC 700699) GN=rpsA PE=3 SV=1 [Q99U14] Score: 247.0	K02945	UNKNOWN	0.0,0.0,0.0,0.0,1.0,0.0,0.0,0.0,0.0,0.0,0.0,0.0,11.0,14.0,7.0,3.0,2.0,4.0,2.0,2.0,0.0,0.0,0.0,0.0,0.0,0.0,0.0,0.0,0.0,0.0,0.0,0.0,0.0,0.0,0.0,0.0,0.0,0.0,2.0,0.0,0.0,0.0,0.0,0.0
MG: Iron-utilization periplasmic protein OS=Haemophilus influenzae (strain ATCC 51907 / DSM 11121 / KW20 / Rd) GN=fbpA PE=1 SV=3 [P35755] Score: 50.8	K02012	UNKNOWN	0.0,0.0,0.0,0.0,0.0,0.0,0.0,0.0,0.0,0.0,0.0,0.0,0.0,0.0,0.0,0.0,0.0,0.0,0.0,0.0,0.0,0.0,0.0,0.0,0.0,0.0,0.0,0.0,0.0,0.0,0.0,0.0,0.0,0.0,0.0,0.0,0.0,0.0,0.0,0.0,0.0,1.0,0.0,0.0
MG: Carbonic anhydrase OS=Helicobacter pylori (strain J99 / ATCC 700824) GN=cynT PE=3 SV=1 [Q9ZN54] Score: 142.0	K01673	4.2.1.1	0.0,0.0,0.0,0.0,0.0,0.0,0.0,0.0,0.0,0.0,0.0,0.0,0.0,0.0,0.0,0.0,0.0,0.0,0.0,2.0,0.0,0.0,0.0,0.0,0.0,0.0,0.0,0.0,0.0,0.0,0.0,0.0,0.0,0.0,0.0,0.0,0.0,0.0,0.0,1.0,0.0,0.0,0.0,0.0
MG: Ferrochelatase OS=Bordetella bronchiseptica (strain ATCC BAA-588 / NCTC 13252 / RB50) GN=hemH PE=3 SV=1 [Q7WGI0] Score: 135.0	K01772	4.99.1.1	0.0,0.0,0.0,0.0,0.0,0.0,0.0,0.0,0.0,0.0,0.0,0.0,0.0,0.0,0.0,0.0,0.0,0.0,0.0,0.0,0.0,0.0,0.0,0.0,0.0,0.0,0.0,0.0,0.0,0.0,0.0,0.0,0.0,0.0,0.0,0.0,0.0,0.0,0.0,0.0,1.0,0.0,1.0,0.0
MG: Alpha-amylase OS=Streptomyces lividans GN=amy PE=1 SV=1 [Q05884] Score: 193.0	UNKNOWN	3.2.1.1	0.0,0.0,0.0,0.0,0.0,0.0,0.0,0.0,0.0,0.0,0.0,0.0,3.0,8.0,1.0,2.0,1.0,9.0,4.0,8.0,0.0,0.0,0.0,0.0,5.0,10.0,7.0,8.0,0.0,0.0,0.0,0.0,7.0,7.0,6.0,3.0,0.0,0.0,0.0,0.0,0.0,4.0,0.0,0.0
MG: Protein NagD homolog OS=Staphylococcus aureus (strain MRSA252) GN=nagD PE=3 SV=1 [Q6GIF9] Score: 170.0	UNKNOWN	3.1.3.-	0.0,0.0,0.0,0.0,0.0,0.0,0.0,0.0,0.0,0.0,0.0,0.0,0.0,0.0,0.0,0.0,0.0,0.0,0.0,0.0,1.0,0.0,0.0,0.0,0.0,0.0,0.0,0.0,1.0,0.0,0.0,0.0,0.0,0.0,0.0,0.0,0.0,0.0,0.0,0.0,0.0,0.0,0.0,0.0
CRCB_RHORT Putative fluoride ion transporter CrcB OS=Rhodospirillum rubrum (strain ATCC 11170 / ATH 1.1.1 / DSM 467 / LMG 4362 / NCIB 8255 / S1) GN=crcB PE=3 SV=1	K06199	UNKNOWN	0.0,0.0,0.0,0.0,0.0,0.0,0.0,0.0,0.0,0.0,0.0,0.0,1.0,0.0,0.0,1.0,0.0,1.0,0.0,0.0,0.0,0.0,0.0,0.0,0.0,0.0,0.0,0.0,0.0,0.0,0.0,0.0,2.0,0.0,0.0,0.0,0.0,0.0,0.0,0.0,0.0,0.0,0.0,0.0
MG: Acetolactate synthase isozyme 1 large subunit OS=Escherichia coli (strain K12) GN=ilvB PE=1 SV=1 [P08142] Score: 620.0	K01652	2.2.1.6	0.0,0.0,0.0,0.0,0.0,0.0,0.0,0.0,0.0,0.0,0.0,0.0,0.0,0.0,0.0,1.0,0.0,0.0,0.0,0.0,0.0,0.0,0.0,0.0,0.0,0.0,0.0,0.0,0.0,0.0,0.0,0.0,0.0,0.0,0.0,0.0,0.0,0.0,0.0,0.0,0.0,0.0,0.0,0.0
MG: Beta-N-acetylhexosaminidase OS=Cellulomonas fimi GN=hex20 PE=1 SV=1 [Q7WUL4] Score: 330.0	UNKNOWN	3.2.1.52	0.0,0.0,0.0,0.0,0.0,0.0,0.0,0.0,0.0,0.0,0.0,1.0,0.0,0.0,0.0,0.0,0.0,0.0,0.0,0.0,0.0,0.0,0.0,0.0,0.0,0.0,0.0,0.0,0.0,0.0,0.0,0.0,0.0,0.0,0.0,0.0,0.0,0.0,0.0,0.0,0.0,0.0,0.0,0.0
MG: Glucose-1-phosphate thymidylyltransferase OS=Yersinia enterocolitica GN=rmlA PE=3 SV=1 [P55257] Score: 397.0	K00973	2.7.7.24	0.0,0.0,1.0,1.0,0.0,0.0,0.0,0.0,0.0,0.0,0.0,0.0,0.0,0.0,0.0,0.0,0.0,0.0,0.0,0.0,0.0,1.0,3.0,3.0,1.0,0.0,0.0,0.0,0.0,1.0,0.0,0.0,0.0,0.0,0.0,0.0,0.0,0.0,0.0,0.0,0.0,1.0,2.0,0.0
MG: Beta-glucosidase OS=Kluyveromyces marxianus PE=3 SV=1 [P07337] Score: 80.1	UNKNOWN	3.2.1.21	0.0,0.0,0.0,0.0,0.0,0.0,0.0,0.0,0.0,0.0,1.0,2.0,0.0,0.0,0.0,0.0,0.0,0.0,0.0,0.0,0.0,0.0,0.0,0.0,0.0,0.0,0.0,0.0,0.0,0.0,0.0,0.0,0.0,0.0,0.0,0.0,0.0,0.0,0.0,0.0,0.0,0.0,0.0,0.0
MG: Type-2 restriction enzyme BsuMI component YdiS OS=Bacillus subtilis (strain 168) GN=ydiS PE=2 SV=1 [O34885] Score: 66.6	UNKNOWN	3.1.21.4	0.0,0.0,0.0,0.0,0.0,0.0,0.0,0.0,0.0,0.0,0.0,0.0,0.0,0.0,0.0,0.0,0.0,0.0,0.0,0.0,0.0,0.0,0.0,0.0,0.0,0.0,0.0,0.0,0.0,0.0,0.0,0.0,0.0,0.0,0.0,0.0,0.0,0.0,0.0,0.0,0.0,0.0,1.0,0.0
PSAK_CUCSA Photosystem I reaction center subunit psaK, chloroplastic (Fragment) OS=Cucumis sativus GN=PSAK PE=1 SV=1	UNKNOWN	UNKNOWN	0.0,0.0,0.0,0.0,0.0,0.0,0.0,0.0,1.0,0.0,0.0,0.0,0.0,0.0,0.0,0.0,0.0,0.0,0.0,0.0,0.0,0.0,0.0,0.0,0.0,0.0,0.0,0.0,0.0,0.0,0.0,0.0,0.0,0.0,0.0,0.0,0.0,0.0,0.0,0.0,0.0,0.0,0.0,0.0
MG: Thiamine-monophosphate kinase OS=Bacillus subtilis (strain 168) GN=thiL PE=3 SV=2 [O05514] Score: 164.0	K00946	2.7.4.16	0.0,0.0,0.0,1.0,0.0,0.0,0.0,0.0,0.0,0.0,0.0,0.0,0.0,0.0,0.0,0.0,0.0,0.0,0.0,0.0,0.0,0.0,0.0,1.0,0.0,0.0,0.0,0.0,0.0,0.0,0.0,0.0,0.0,0.0,0.0,0.0,0.0,0.0,0.0,0.0,0.0,0.0,0.0,0.0
HLYA_SERMA Hemolysin OS=Serratia marcescens GN=shlA PE=1 SV=1	UNKNOWN	UNKNOWN	0.0,0.0,0.0,0.0,0.0,0.0,0.0,0.0,0.0,0.0,0.0,0.0,0.0,0.0,0.0,0.0,1.0,0.0,0.0,0.0,0.0,0.0,0.0,0.0,0.0,0.0,0.0,0.0,0.0,0.0,0.0,0.0,0.0,0.0,0.0,0.0,0.0,0.0,0.0,0.0,0.0,0.0,0.0,0.0
DNAK_EUBE2 Chaperone protein DnaK OS=Eubacterium eligens (strain ATCC 27750 / VPI C15-48) GN=dnaK PE=3 SV=1	K04043	UNKNOWN	6.0,7.0,85.0,69.0,14.0,12.0,27.0,10.0,7.0,5.0,5.0,14.0,7.0,6.0,8.0,0.0,3.0,3.0,0.0,1.0,16.0,22.0,27.0,17.0,3.0,2.0,3.0,0.0,12.0,9.0,3.0,4.0,3.0,2.0,10.0,14.0,10.0,20.0,16.0,13.0,0.0,11.0,13.0,15.0
MG: Protein hit OS=Bacillus subtilis (strain 168) GN=hit PE=1 SV=1 [O07513] Score: 160.0	K02503	UNKNOWN	1.0,1.0,2.0,1.0,0.0,0.0,0.0,0.0,0.0,0.0,0.0,0.0,0.0,0.0,0.0,0.0,0.0,0.0,0.0,0.0,0.0,0.0,0.0,0.0,0.0,0.0,0.0,0.0,0.0,0.0,0.0,0.0,0.0,0.0,0.0,0.0,0.0,0.0,0.0,0.0,0.0,0.0,0.0,0.0
U518_CAEBR UPF0518 protein CBG19667 OS=Caenorhabditis briggsae GN=CBG19667 PE=3 SV=2	UNKNOWN	UNKNOWN	0.0,0.0,0.0,0.0,0.0,1.0,0.0,0.0,0.0,0.0,0.0,0.0,0.0,0.0,0.0,0.0,0.0,0.0,0.0,0.0,0.0,0.0,0.0,0.0,0.0,0.0,0.0,0.0,0.0,0.0,0.0,0.0,0.0,0.0,0.0,0.0,0.0,0.0,0.0,0.0,0.0,0.0,0.0,0.0
MG: UDP-N-acetylglucosamine 1-carboxyvinyltransferase OS=Treponema pallidum (strain Nichols) GN=murA PE=3 SV=1 [O54312] Score: 142.0	K00790	2.5.1.7	0.0,0.0,0.0,0.0,0.0,0.0,0.0,0.0,0.0,0.0,0.0,0.0,0.0,0.0,0.0,0.0,0.0,0.0,1.0,0.0,0.0,0.0,0.0,0.0,0.0,0.0,0.0,0.0,0.0,0.0,0.0,0.0,0.0,0.0,0.0,0.0,0.0,0.0,2.0,0.0,0.0,0.0,0.0,0.0
MG: Protein translocase subunit SecF OS=Treponema pallidum (strain Nichols) GN=secF PE=3 SV=1 [O83426] Score: 259.0	K03074	UNKNOWN	0.0,0.0,0.0,0.0,0.0,0.0,0.0,0.0,1.0,0.0,0.0,0.0,0.0,0.0,0.0,0.0,0.0,0.0,0.0,0.0,0.0,0.0,0.0,0.0,0.0,0.0,0.0,0.0,0.0,0.0,0.0,0.0,0.0,0.0,0.0,0.0,0.0,0.0,0.0,0.0,0.0,0.0,0.0,0.0
RS4_BUCCC 30S ribosomal protein S4 OS=Buchnera aphidicola subsp. Cinara cedri (strain Cc) GN=rpsD PE=3 SV=1	K02986	UNKNOWN	0.0,0.0,0.0,0.0,0.0,5.0,0.0,0.0,0.0,0.0,0.0,0.0,0.0,0.0,1.0,0.0,0.0,0.0,0.0,0.0,0.0,0.0,0.0,0.0,0.0,0.0,0.0,0.0,0.0,0.0,0.0,0.0,0.0,0.0,0.0,0.0,0.0,0.0,0.0,0.0,0.0,0.0,5.0,0.0
RPOB_CARRP DNA-directed RNA polymerase subunit beta OS=Carsonella ruddii (strain PV) GN=rpoB PE=3 SV=1	K03043	2.7.7.6	0.0,0.0,0.0,0.0,0.0,0.0,1.0,0.0,0.0,0.0,0.0,0.0,0.0,0.0,0.0,0.0,0.0,0.0,0.0,0.0,0.0,0.0,0.0,0.0,0.0,0.0,0.0,0.0,0.0,0.0,0.0,0.0,0.0,0.0,0.0,0.0,0.0,0.0,0.0,0.0,0.0,0.0,0.0,0.0
MG: UTP--glucose-1-phosphate uridylyltransferase OS=Streptococcus pneumoniae serotype 4 (strain ATCC BAA-334 / TIGR4) GN=cap4C PE=3 SV=1 [P58313] Score: 543.0	K00963	2.7.7.9	0.0,0.0,6.0,4.0,0.0,0.0,0.0,0.0,0.0,0.0,0.0,0.0,0.0,0.0,0.0,0.0,0.0,0.0,0.0,0.0,0.0,0.0,0.0,0.0,0.0,0.0,0.0,0.0,0.0,0.0,0.0,0.0,0.0,0.0,0.0,0.0,0.0,0.0,0.0,1.0,0.0,0.0,0.0,0.0
IBP1_ICTTR Insulin-like growth factor-binding protein 1 OS=Ictidomys tridecemlineatus GN=IGFBP1 PE=2 SV=1	UNKNOWN	UNKNOWN	0.0,0.0,0.0,0.0,0.0,0.0,0.0,0.0,0.0,0.0,0.0,1.0,0.0,0.0,0.0,0.0,0.0,0.0,0.0,0.0,0.0,0.0,0.0,0.0,0.0,0.0,0.0,0.0,0.0,0.0,0.0,0.0,0.0,0.0,0.0,0.0,0.0,0.0,0.0,0.0,0.0,0.0,0.0,0.0
MG: Dihydrolipoyl dehydrogenase OS=Thermus scotoductus (strain ATCC 700910 / SA-01) GN=lpd PE=1 SV=2 [P85207] Score: 357.0	K00382	1.8.1.4	0.0,0.0,0.0,0.0,0.0,0.0,0.0,0.0,0.0,0.0,0.0,0.0,0.0,0.0,0.0,0.0,0.0,0.0,0.0,0.0,0.0,0.0,0.0,0.0,1.0,0.0,0.0,0.0,0.0,0.0,0.0,0.0,0.0,0.0,0.0,0.0,0.0,0.0,0.0,0.0,0.0,0.0,0.0,0.0
FRI2_VIGUN Ferritin-2, chloroplastic OS=Vigna unguiculata GN=PFE2 PE=2 SV=2	UNKNOWN	1.16.3.1	0.0,0.0,0.0,0.0,0.0,0.0,0.0,0.0,0.0,0.0,0.0,0.0,10.0,0.0,3.0,0.0,0.0,0.0,2.0,1.0,0.0,0.0,0.0,0.0,0.0,0.0,0.0,0.0,0.0,0.0,0.0,0.0,0.0,0.0,0.0,0.0,0.0,0.0,0.0,0.0,0.0,0.0,0.0,0.0
RL28_RHISN 50S ribosomal protein L28 OS=Rhizobium sp. (strain NGR234) GN=rpmB PE=3 SV=1	K02902	UNKNOWN	0.0,0.0,0.0,0.0,0.0,0.0,6.0,0.0,0.0,0.0,0.0,0.0,0.0,0.0,0.0,0.0,0.0,0.0,0.0,0.0,0.0,0.0,0.0,0.0,0.0,0.0,0.0,0.0,0.0,0.0,0.0,0.0,0.0,0.0,0.0,0.0,0.0,0.0,0.0,0.0,0.0,0.0,0.0,0.0
METK_STRP8 S-adenosylmethionine synthase OS=Streptococcus pyogenes serotype M18 (strain MGAS8232) GN=metK PE=3 SV=1	K00789	2.5.1.6	0.0,0.0,0.0,0.0,0.0,0.0,0.0,0.0,0.0,0.0,0.0,0.0,0.0,0.0,0.0,0.0,0.0,0.0,0.0,0.0,0.0,0.0,0.0,0.0,0.0,0.0,0.0,0.0,0.0,0.0,0.0,0.0,0.0,0.0,0.0,0.0,0.0,0.0,2.0,0.0,0.0,0.0,0.0,0.0
MG: dTDP-3-amino-3,6-dideoxy-alpha-D-galactopyranose 3-N-acetyltransferase OS=Aneurinibacillus thermoaerophilus GN=fdtC PE=1 SV=1 [Q6T1W7] Score: 194.0	UNKNOWN	2.3.1.197	1.0,0.0,0.0,0.0,0.0,0.0,0.0,0.0,0.0,0.0,0.0,0.0,0.0,0.0,0.0,0.0,0.0,1.0,0.0,0.0,0.0,0.0,0.0,0.0,0.0,0.0,0.0,0.0,0.0,0.0,0.0,0.0,0.0,0.0,0.0,0.0,0.0,0.0,0.0,0.0,0.0,1.0,0.0,0.0
Y1998_SYMTH UPF0297 protein STH1998 OS=Symbiobacterium thermophilum (strain T / IAM 14863) GN=STH1998 PE=3 SV=1	UNKNOWN	UNKNOWN	0.0,0.0,0.0,0.0,0.0,0.0,0.0,0.0,2.0,2.0,0.0,2.0,0.0,0.0,0.0,0.0,0.0,0.0,0.0,0.0,0.0,0.0,0.0,0.0,0.0,0.0,0.0,0.0,0.0,0.0,0.0,0.0,0.0,0.0,1.0,2.0,0.0,0.0,0.0,0.0,0.0,0.0,0.0,0.0
XYLG_PECAS Xylose import ATP-binding protein XylG OS=Pectobacterium atrosepticum (strain SCRI 1043 / ATCC BAA-672) GN=xylG PE=3 SV=1	K10545	3.6.3.17	0.0,0.0,0.0,0.0,0.0,0.0,0.0,1.0,0.0,0.0,0.0,0.0,0.0,0.0,0.0,0.0,0.0,0.0,0.0,0.0,0.0,0.0,0.0,0.0,0.0,1.0,0.0,0.0,0.0,0.0,0.0,0.0,0.0,0.0,0.0,0.0,0.0,0.0,0.0,0.0,0.0,0.0,0.0,0.0
MG: Carboxylesterase A OS=Mycobacterium tuberculosis (strain ATCC 25618 / H37Rv) GN=caeA PE=1 SV=1 [P9WHR3] Score: 266.0	UNKNOWN	3.1.1.-	0.0,0.0,0.0,0.0,0.0,0.0,0.0,0.0,0.0,0.0,0.0,0.0,0.0,0.0,0.0,0.0,0.0,0.0,0.0,0.0,0.0,0.0,0.0,0.0,0.0,0.0,0.0,0.0,0.0,0.0,0.0,0.0,0.0,0.0,0.0,0.0,0.0,0.0,0.0,0.0,0.0,0.0,0.0,1.0
MG: Swarming motility protein YbiA OS=Escherichia coli (strain K12) GN=ybiA PE=1 SV=1 [P30176] Score: 63.9	K09935	3.2.2.-	0.0,0.0,0.0,0.0,0.0,0.0,1.0,0.0,0.0,0.0,0.0,0.0,0.0,0.0,0.0,0.0,0.0,0.0,0.0,0.0,0.0,0.0,0.0,0.0,0.0,0.0,0.0,0.0,0.0,0.0,0.0,0.0,0.0,0.0,0.0,0.0,0.0,0.0,0.0,0.0,0.0,0.0,0.0,0.0
MG: Long-chain-fatty-acid--CoA ligase FadD15 OS=Mycobacterium marinum (strain ATCC BAA-535 / M) GN=fadD15 PE=3 SV=1 [B2HGV4] Score: 146.0	K01897	6.2.1.3	0.0,0.0,0.0,0.0,0.0,1.0,1.0,0.0,0.0,0.0,0.0,0.0,2.0,0.0,0.0,0.0,0.0,0.0,0.0,0.0,0.0,0.0,0.0,1.0,0.0,0.0,0.0,0.0,0.0,0.0,0.0,0.0,0.0,1.0,0.0,0.0,0.0,0.0,0.0,0.0,0.0,0.0,0.0,0.0
MG: Bacilysin biosynthesis oxidoreductase BacC OS=Bacillus subtilis GN=bacC PE=3 SV=1 [Q8KWT4] Score: 181.0	UNKNOWN	1.1.1.385	0.0,0.0,0.0,0.0,0.0,0.0,0.0,0.0,0.0,0.0,0.0,0.0,0.0,0.0,0.0,0.0,0.0,0.0,0.0,0.0,0.0,0.0,0.0,0.0,8.0,2.0,0.0,0.0,0.0,0.0,0.0,0.0,0.0,0.0,0.0,0.0,0.0,0.0,0.0,0.0,0.0,0.0,0.0,1.0
MG: 30S ribosomal protein S19 OS=Methanosarcina barkeri (strain Fusaro / DSM 804) GN=rps19 PE=3 SV=1 [Q46G99] Score: 266.0	K02965	UNKNOWN	0.0,0.0,0.0,0.0,2.0,6.0,2.0,0.0,0.0,0.0,0.0,0.0,0.0,0.0,0.0,0.0,0.0,0.0,0.0,0.0,0.0,0.0,0.0,0.0,0.0,0.0,0.0,0.0,0.0,0.0,0.0,0.0,0.0,0.0,0.0,0.0,0.0,0.0,0.0,0.0,0.0,0.0,0.0,0.0
FILA_HUMAN Filaggrin OS=Homo sapiens GN=FLG PE=1 SV=3	UNKNOWN	UNKNOWN	0.0,0.0,0.0,0.0,0.0,1.0,0.0,0.0,0.0,0.0,1.0,1.0,0.0,0.0,0.0,0.0,0.0,0.0,0.0,0.0,0.0,0.0,1.0,0.0,3.0,0.0,0.0,3.0,0.0,2.0,0.0,0.0,0.0,0.0,14.0,10.0,10.0,14.0,0.0,0.0,0.0,0.0,1.0,0.0
MG: Uncharacterized protein MJ1544 OS=Methanocaldococcus jannaschii (strain ATCC 43067 / DSM 2661 / JAL-1 / JCM 10045 / NBRC 100440) GN=MJ1544 PE=4 SV=1 [Q58939] Score: 200.0	K07133	UNKNOWN	0.0,0.0,0.0,0.0,0.0,0.0,0.0,0.0,0.0,0.0,0.0,0.0,1.0,0.0,0.0,0.0,0.0,0.0,0.0,0.0,1.0,4.0,0.0,5.0,0.0,0.0,0.0,0.0,0.0,0.0,0.0,0.0,0.0,0.0,0.0,0.0,0.0,0.0,0.0,0.0,0.0,0.0,0.0,0.0
MG: 8-hydroxy-5-deazaflavin:NADPH oxidoreductase OS=Archaeoglobus fulgidus (strain ATCC 49558 / VC-16 / DSM 4304 / JCM 9628 / NBRC 100126) GN=AF_0892 PE=1 SV=1 [O29370] Score: 150.0	K06988	1.5.1.40	0.0,2.0,0.0,0.0,11.0,5.0,0.0,3.0,7.0,5.0,3.0,0.0,0.0,0.0,0.0,0.0,0.0,0.0,0.0,0.0,0.0,0.0,0.0,0.0,9.0,6.0,9.0,2.0,2.0,2.0,0.0,1.0,0.0,1.0,6.0,3.0,0.0,0.0,0.0,2.0,0.0,0.0,0.0,0.0
DAPA_THEPX 4-hydroxy-tetrahydrodipicolinate synthase OS=Thermoanaerobacter sp. (strain X514) GN=dapA PE=3 SV=1	K01714	4.3.3.7	0.0,0.0,0.0,0.0,0.0,0.0,1.0,0.0,0.0,0.0,0.0,0.0,0.0,0.0,0.0,0.0,0.0,0.0,0.0,0.0,0.0,0.0,0.0,0.0,0.0,0.0,0.0,0.0,0.0,0.0,0.0,0.0,0.0,0.0,0.0,0.0,0.0,0.0,1.0,0.0,0.0,0.0,0.0,0.0
MG: Ribosomal RNA large subunit methyltransferase H OS=Halothermothrix orenii (strain H 168 / OCM 544 / DSM 9562) GN=rlmH PE=3 SV=1 [B8CZR7] Score: 142.0	K00783	2.1.1.177	0.0,0.0,0.0,0.0,0.0,0.0,0.0,0.0,0.0,0.0,0.0,0.0,0.0,0.0,0.0,0.0,0.0,0.0,0.0,0.0,0.0,0.0,0.0,0.0,0.0,0.0,0.0,0.0,0.0,0.0,0.0,0.0,0.0,0.0,0.0,0.0,0.0,0.0,0.0,1.0,0.0,0.0,0.0,0.0
MG: Voltage-gated potassium channel subunit beta-1 OS=Mustela putorius GN=KCNAB1 PE=2 SV=1 [Q28528] Score: 74.3	UNKNOWN	1.1.1.-	0.0,0.0,0.0,0.0,2.0,4.0,0.0,0.0,0.0,0.0,1.0,0.0,3.0,0.0,0.0,0.0,3.0,0.0,0.0,0.0,0.0,0.0,0.0,0.0,0.0,0.0,4.0,0.0,0.0,0.0,0.0,0.0,3.0,0.0,1.0,0.0,0.0,0.0,0.0,0.0,0.0,0.0,0.0,0.0
MG: Putative acetyltransferase BSU40680 OS=Bacillus subtilis (strain 168) GN=yybD PE=3 SV=1 [P37500] Score: 172.0	UNKNOWN	2.3.1.-	3.0,0.0,0.0,1.0,1.0,0.0,2.0,1.0,0.0,0.0,0.0,0.0,0.0,0.0,0.0,0.0,0.0,0.0,0.0,0.0,0.0,0.0,0.0,0.0,0.0,0.0,0.0,0.0,0.0,0.0,0.0,0.0,0.0,0.0,0.0,0.0,0.0,0.0,0.0,0.0,0.0,0.0,0.0,0.0
MG: Ribosomal RNA small subunit methyltransferase G OS=Arthrobacter aurescens (strain TC1) GN=rsmG PE=3 SV=1 [A1RCA8] Score: 236.0	K03501	2.1.1.-	0.0,0.0,0.0,0.0,0.0,0.0,0.0,0.0,0.0,1.0,0.0,0.0,0.0,0.0,0.0,0.0,0.0,0.0,0.0,0.0,0.0,0.0,0.0,0.0,0.0,0.0,0.0,0.0,0.0,0.0,0.0,0.0,0.0,0.0,0.0,0.0,0.0,0.0,0.0,0.0,0.0,0.0,0.0,0.0
GLK_NOSS1 Glucokinase OS=Nostoc sp. (strain PCC 7120 / UTEX 2576) GN=glk PE=3 SV=1	K00845	2.7.1.2	1.0,0.0,4.0,3.0,0.0,0.0,8.0,7.0,2.0,1.0,2.0,2.0,0.0,0.0,0.0,0.0,0.0,0.0,0.0,0.0,0.0,0.0,0.0,0.0,0.0,0.0,0.0,0.0,0.0,0.0,0.0,0.0,0.0,0.0,0.0,0.0,0.0,0.0,0.0,0.0,0.0,0.0,0.0,1.0
MG: Sugar fermentation stimulation protein homolog OS=Desulfotomaculum reducens (strain MI-1) GN=sfsA PE=3 SV=1 [A4J7I8] Score: 171.0	K06206	UNKNOWN	0.0,0.0,0.0,0.0,0.0,0.0,0.0,0.0,0.0,0.0,0.0,0.0,0.0,0.0,0.0,0.0,0.0,0.0,0.0,0.0,0.0,0.0,0.0,0.0,0.0,0.0,0.0,0.0,0.0,0.0,0.0,0.0,0.0,0.0,1.0,0.0,0.0,0.0,0.0,0.0,0.0,0.0,0.0,0.0
MG: K(+)-stimulated pyrophosphate-energized sodium pump OS=Methanosarcina mazei (strain ATCC BAA-159 / DSM 3647 / Goe1 / Go1 / JCM 11833 / OCM 88) GN=hppA1 PE=1 SV=1 [Q8PYZ8] Score: 342.0	K15987	3.6.1.1	12.0,15.0,7.0,13.0,5.0,6.0,3.0,5.0,11.0,8.0,5.0,8.0,3.0,5.0,3.0,0.0,1.0,2.0,4.0,2.0,3.0,7.0,3.0,0.0,11.0,1.0,7.0,8.0,0.0,7.0,1.0,3.0,2.0,3.0,6.0,4.0,12.0,7.0,11.0,7.0,2.0,10.0,2.0,5.0
DMD_HUMAN Dystrophin OS=Homo sapiens GN=DMD PE=1 SV=3	K10366	UNKNOWN	0.0,0.0,0.0,0.0,0.0,0.0,0.0,0.0,0.0,0.0,0.0,0.0,0.0,0.0,0.0,0.0,0.0,0.0,0.0,0.0,0.0,0.0,0.0,0.0,0.0,1.0,0.0,0.0,0.0,0.0,0.0,0.0,0.0,0.0,0.0,0.0,0.0,0.0,0.0,0.0,0.0,0.0,0.0,0.0
H2B1C_HUMAN Histone H2B type 1-C/E/F/G/I OS=Homo sapiens GN=HIST1H2BC PE=1 SV=4	K11252	UNKNOWN	0.0,0.0,0.0,0.0,0.0,0.0,0.0,0.0,0.0,0.0,4.0,0.0,0.0,0.0,0.0,0.0,0.0,0.0,0.0,15.0,6.0,4.0,6.0,8.0,2.0,6.0,4.0,4.0,0.0,0.0,0.0,0.0,0.0,0.0,2.0,0.0,0.0,0.0,0.0,13.0,0.0,0.0,0.0,0.0
MG: Zinc transporter ZupT OS=Salmonella arizonae (strain ATCC BAA-731 / CDC346-86 / RSK2980) GN=zupT PE=3 SV=1 [A9MPX1] Score: 51.2	K07238	UNKNOWN	0.0,0.0,0.0,0.0,0.0,0.0,0.0,0.0,0.0,0.0,0.0,0.0,0.0,0.0,0.0,0.0,0.0,0.0,0.0,0.0,0.0,0.0,0.0,0.0,0.0,0.0,0.0,0.0,0.0,0.0,0.0,0.0,0.0,0.0,0.0,0.0,0.0,0.0,0.0,0.0,1.0,0.0,1.0,0.0
SYEC_ENTBH Probable glutamate--tRNA ligase, cytoplasmic OS=Enterocytozoon bieneusi (strain H348) GN=EBI_22577 PE=3 SV=1	UNKNOWN	6.1.1.17	0.0,0.0,0.0,0.0,0.0,0.0,0.0,0.0,0.0,0.0,1.0,0.0,0.0,0.0,0.0,0.0,0.0,0.0,0.0,0.0,0.0,0.0,0.0,0.0,0.0,0.0,0.0,0.0,0.0,0.0,0.0,0.0,0.0,0.0,0.0,0.0,0.0,0.0,0.0,0.0,0.0,0.0,0.0,0.0
ATPG_EHRRG ATP synthase gamma chain OS=Ehrlichia ruminantium (strain Gardel) GN=atpG PE=3 SV=1	K02115	UNKNOWN	0.0,0.0,0.0,0.0,0.0,0.0,0.0,0.0,0.0,0.0,0.0,0.0,0.0,0.0,0.0,0.0,1.0,0.0,0.0,0.0,0.0,0.0,0.0,0.0,0.0,0.0,0.0,0.0,0.0,0.0,0.0,0.0,0.0,0.0,0.0,0.0,0.0,0.0,0.0,0.0,0.0,0.0,0.0,0.0
RL40_FELCA Ubiquitin-60S ribosomal protein L40 OS=Felis catus GN=UBA52 PE=2 SV=2	K02927	UNKNOWN	0.0,0.0,0.0,0.0,0.0,1.0,0.0,1.0,4.0,2.0,4.0,2.0,0.0,1.0,0.0,0.0,0.0,0.0,0.0,1.0,0.0,1.0,0.0,0.0,0.0,0.0,0.0,4.0,0.0,0.0,2.0,0.0,1.0,0.0,2.0,3.0,0.0,1.0,13.0,0.0,0.0,0.0,0.0,0.0
CRU3_ARATH 12S seed storage protein CRC OS=Arabidopsis thaliana GN=CRC PE=1 SV=1	UNKNOWN	UNKNOWN	0.0,0.0,0.0,0.0,23.0,25.0,26.0,25.0,0.0,0.0,0.0,0.0,145.0,107.0,121.0,105.0,121.0,92.0,34.0,105.0,37.0,26.0,46.0,63.0,76.0,55.0,59.0,34.0,10.0,8.0,7.0,5.0,139.0,146.0,232.0,192.0,98.0,148.0,51.0,50.0,0.0,0.0,0.0,0.0
MG: TPR repeat-containing protein MJ1345 OS=Methanocaldococcus jannaschii (strain ATCC 43067 / DSM 2661 / JAL-1 / JCM 10045 / NBRC 100440) GN=MJ1345 PE=3 SV=1 [Q58741] Score: 71.2	UNKNOWN	UNKNOWN	1.0,0.0,0.0,1.0,0.0,0.0,0.0,3.0,0.0,0.0,0.0,0.0,4.0,0.0,1.0,0.0,2.0,2.0,0.0,0.0,0.0,0.0,0.0,0.0,0.0,0.0,0.0,0.0,0.0,0.0,0.0,0.0,0.0,0.0,1.0,0.0,0.0,0.0,0.0,0.0,0.0,0.0,0.0,2.0
MG: Exopolyphosphatase OS=Pseudomonas aeruginosa (strain ATCC 15692 / PAO1 / 1C / PRS 101 / LMG 12228) GN=ppx PE=3 SV=1 [Q9ZN70] Score: 138.0	K01524	3.6.1.11	0.0,0.0,0.0,0.0,0.0,1.0,0.0,0.0,0.0,0.0,0.0,0.0,0.0,0.0,0.0,0.0,0.0,0.0,1.0,0.0,0.0,0.0,0.0,0.0,0.0,0.0,0.0,0.0,0.0,0.0,0.0,0.0,0.0,0.0,0.0,0.0,0.0,0.0,0.0,0.0,0.0,0.0,0.0,0.0
PSA2_HALVD Proteasome subunit alpha 2 OS=Haloferax volcanii (strain ATCC 29605 / DSM 3757 / JCM 8879 / NBRC 14742 / NCIMB 2012 / VKM B-1768 / DS2) GN=psmA2 PE=1 SV=1	K03432	3.4.25.1	0.0,0.0,0.0,0.0,0.0,0.0,0.0,0.0,0.0,0.0,0.0,0.0,4.0,0.0,1.0,0.0,3.0,0.0,0.0,0.0,0.0,0.0,0.0,0.0,0.0,0.0,0.0,0.0,3.0,0.0,1.0,0.0,0.0,0.0,0.0,0.0,0.0,0.0,0.0,0.0,0.0,0.0,0.0,0.0
MG: Carbon starvation protein A homolog OS=Aquifex aeolicus (strain VF5) GN=cstA PE=3 SV=1 [O67304] Score: 313.0	K06200	UNKNOWN	4.0,0.0,0.0,0.0,12.0,16.0,18.0,21.0,7.0,8.0,2.0,10.0,86.0,77.0,56.0,67.0,63.0,75.0,65.0,62.0,12.0,14.0,13.0,8.0,5.0,1.0,2.0,4.0,8.0,6.0,4.0,6.0,4.0,4.0,6.0,2.0,0.0,1.0,15.0,11.0,0.0,1.0,0.0,6.0
GMP_LOTGI Glycine and methionine-rich protein OS=Lottia gigantea PE=1 SV=1	UNKNOWN	UNKNOWN	0.0,0.0,0.0,0.0,0.0,0.0,0.0,0.0,0.0,0.0,0.0,0.0,0.0,0.0,0.0,0.0,0.0,0.0,0.0,0.0,0.0,0.0,1.0,0.0,0.0,0.0,0.0,0.0,0.0,0.0,0.0,0.0,0.0,0.0,0.0,0.0,0.0,0.0,0.0,0.0,0.0,0.0,0.0,0.0
MG: Penicillin-binding protein activator LpoB OS=Edwardsiella tarda (strain EIB202) GN=lpoB PE=3 SV=1 [D0Z8F8] Score: 48.1	K07337	UNKNOWN	0.0,0.0,0.0,0.0,0.0,0.0,0.0,0.0,0.0,0.0,0.0,0.0,0.0,0.0,0.0,0.0,0.0,0.0,0.0,0.0,0.0,0.0,2.0,6.0,0.0,0.0,0.0,0.0,0.0,1.0,0.0,0.0,0.0,0.0,0.0,0.0,0.0,0.0,0.0,0.0,0.0,0.0,0.0,0.0
MG: Probable metallo-hydrolase YqjP OS=Bacillus subtilis (strain 168) GN=yqjP PE=3 SV=1 [P54553] Score: 53.9	UNKNOWN	3.-.-.-	0.0,1.0,1.0,0.0,0.0,1.0,0.0,0.0,0.0,0.0,0.0,0.0,0.0,0.0,0.0,0.0,0.0,0.0,0.0,0.0,0.0,0.0,0.0,0.0,0.0,0.0,0.0,0.0,0.0,0.0,0.0,0.0,0.0,0.0,0.0,0.0,0.0,0.0,0.0,0.0,0.0,0.0,0.0,0.0
MG: Probable uracil permease OS=Haemophilus influenzae (strain ATCC 51907 / DSM 11121 / KW20 / Rd) GN=uraA PE=3 SV=1 [P45117] Score: 310.0	K02824	UNKNOWN	7.0,10.0,14.0,10.0,8.0,11.0,11.0,9.0,0.0,1.0,4.0,6.0,13.0,13.0,6.0,4.0,5.0,13.0,6.0,14.0,6.0,2.0,5.0,4.0,15.0,12.0,11.0,8.0,1.0,1.0,5.0,2.0,9.0,11.0,10.0,4.0,2.0,10.0,6.0,7.0,0.0,0.0,1.0,2.0
MG: Influenza virus NS1A-binding protein homolog OS=Xenopus laevis GN=ivns1abp PE=2 SV=1 [Q6DFU2] Score: 79.7	K15046	UNKNOWN	0.0,0.0,0.0,0.0,0.0,0.0,0.0,0.0,0.0,0.0,0.0,0.0,0.0,0.0,0.0,0.0,2.0,1.0,0.0,0.0,0.0,0.0,0.0,0.0,1.0,1.0,0.0,0.0,0.0,0.0,0.0,0.0,0.0,0.0,0.0,0.0,0.0,0.0,0.0,0.0,0.0,0.0,0.0,0.0
MG: DNA mismatch repair protein MutS OS=Bacillus anthracis GN=mutS PE=3 SV=1 [Q81WR3] Score: 752.0	K03555	UNKNOWN	0.0,0.0,0.0,0.0,0.0,0.0,0.0,0.0,0.0,0.0,0.0,0.0,0.0,0.0,0.0,0.0,0.0,0.0,0.0,0.0,0.0,1.0,0.0,0.0,0.0,0.0,0.0,0.0,0.0,0.0,0.0,0.0,0.0,0.0,0.0,0.0,0.0,0.0,0.0,1.0,0.0,0.0,0.0,1.0
MG: Phosphate-specific transport system accessory protein PhoU homolog OS=Aquifex aeolicus (strain VF5) GN=phoU PE=1 SV=1 [O67053] Score: 77.8	K02039	UNKNOWN	0.0,0.0,0.0,0.0,2.0,0.0,2.0,0.0,0.0,0.0,0.0,0.0,3.0,0.0,0.0,1.0,0.0,0.0,1.0,3.0,0.0,0.0,1.0,0.0,0.0,0.0,0.0,0.0,0.0,0.0,0.0,0.0,0.0,0.0,0.0,0.0,0.0,0.0,1.0,0.0,0.0,1.0,1.0,3.0
MG: Nif-specific regulatory protein OS=Bradyrhizobium diazoefficiens (strain JCM 10833 / IAM 13628 / NBRC 14792 / USDA 110) GN=nifA PE=1 SV=4 [P05407] Score: 236.0	K02584	UNKNOWN	0.0,0.0,0.0,0.0,0.0,0.0,0.0,0.0,0.0,0.0,1.0,0.0,0.0,0.0,0.0,0.0,0.0,0.0,0.0,0.0,0.0,0.0,0.0,0.0,0.0,0.0,0.0,0.0,0.0,0.0,0.0,0.0,0.0,0.0,0.0,0.0,0.0,0.0,0.0,0.0,0.0,0.0,0.0,0.0
MG: Glutathione reductase OS=Burkholderia cepacia GN=gor PE=3 SV=1 [P48639] Score: 198.0	UNKNOWN	1.8.1.7	0.0,0.0,0.0,0.0,0.0,0.0,0.0,0.0,0.0,0.0,0.0,0.0,0.0,0.0,0.0,0.0,0.0,0.0,0.0,1.0,0.0,0.0,0.0,0.0,0.0,0.0,0.0,0.0,0.0,0.0,0.0,0.0,0.0,0.0,0.0,0.0,0.0,0.0,0.0,0.0,0.0,0.0,0.0,0.0
MG: Multidrug resistance protein NorM OS=Burkholderia vietnamiensis GN=norM PE=3 SV=1 [Q9F5N7] Score: 95.9	UNKNOWN	UNKNOWN	0.0,0.0,0.0,0.0,0.0,0.0,0.0,0.0,0.0,0.0,0.0,0.0,0.0,0.0,1.0,0.0,0.0,0.0,0.0,0.0,0.0,0.0,0.0,0.0,0.0,0.0,0.0,0.0,0.0,0.0,0.0,0.0,0.0,0.0,0.0,0.0,0.0,0.0,0.0,0.0,0.0,0.0,0.0,0.0
MG: Holliday junction ATP-dependent DNA helicase RuvA OS=Yersinia pestis GN=ruvA PE=3 SV=1 [Q8ZEU6] Score: 160.0	K03550	3.6.4.12	0.0,0.0,0.0,0.0,0.0,0.0,0.0,0.0,0.0,0.0,1.0,0.0,0.0,2.0,1.0,0.0,0.0,6.0,0.0,2.0,0.0,0.0,0.0,0.0,0.0,0.0,0.0,0.0,0.0,0.0,0.0,0.0,0.0,0.0,0.0,0.0,0.0,0.0,0.0,0.0,0.0,0.0,0.0,0.0
MG: RNA polymerase sigma-28 factor OS=Bacillus cereus (strain ATCC 14579 / DSM 31 / JCM 2152 / NBRC 15305 / NCIMB 9373 / NRRL B-3711) GN=sigK PE=3 SV=1 [P62180] Score: 139.0	K03091	UNKNOWN	0.0,0.0,0.0,0.0,0.0,0.0,0.0,0.0,0.0,0.0,0.0,0.0,0.0,0.0,0.0,0.0,0.0,0.0,0.0,0.0,0.0,1.0,0.0,0.0,0.0,0.0,0.0,0.0,0.0,0.0,0.0,0.0,0.0,0.0,0.0,1.0,0.0,0.0,1.0,0.0,0.0,0.0,0.0,0.0
BIOD_ANADF ATP-dependent dethiobiotin synthetase BioD OS=Anaeromyxobacter sp. (strain Fw109-5) GN=bioD PE=3 SV=1	K01935	6.3.3.3	0.0,0.0,0.0,0.0,0.0,0.0,0.0,0.0,0.0,0.0,0.0,0.0,0.0,0.0,0.0,0.0,0.0,0.0,0.0,0.0,0.0,0.0,0.0,0.0,0.0,0.0,0.0,0.0,0.0,0.0,0.0,0.0,0.0,0.0,0.0,0.0,0.0,1.0,0.0,0.0,0.0,0.0,1.0,0.0
EF1A2_EUPCR Elongation factor 1-alpha 2 OS=Euplotes crassus GN=EFA2 PE=3 SV=1	UNKNOWN	UNKNOWN	6.0,1.0,3.0,1.0,1.0,1.0,1.0,1.0,0.0,0.0,21.0,0.0,1.0,0.0,0.0,0.0,0.0,0.0,0.0,0.0,0.0,0.0,0.0,0.0,0.0,0.0,0.0,0.0,0.0,0.0,0.0,0.0,0.0,0.0,0.0,0.0,0.0,0.0,1.0,0.0,0.0,0.0,0.0,0.0
YKGE_ECOLI Uncharacterized protein YkgE OS=Escherichia coli (strain K12) GN=ykgE PE=3 SV=1	K18928	UNKNOWN	0.0,0.0,0.0,0.0,0.0,0.0,0.0,0.0,0.0,0.0,0.0,0.0,1.0,1.0,1.0,0.0,2.0,1.0,0.0,0.0,0.0,0.0,0.0,0.0,0.0,0.0,0.0,0.0,0.0,0.0,0.0,0.0,0.0,0.0,0.0,0.0,0.0,0.0,0.0,0.0,0.0,0.0,0.0,0.0
VPS72_DROME Vacuolar protein sorting-associated protein 72 homolog OS=Drosophila melanogaster GN=YL-1 PE=1 SV=1	K11664	UNKNOWN	0.0,0.0,0.0,0.0,0.0,0.0,0.0,0.0,0.0,0.0,0.0,0.0,1.0,0.0,0.0,0.0,0.0,0.0,0.0,0.0,0.0,0.0,0.0,0.0,0.0,0.0,0.0,0.0,0.0,0.0,0.0,0.0,0.0,0.0,0.0,0.0,0.0,0.0,0.0,0.0,0.0,0.0,0.0,0.0
PSAD_HORVU Photosystem I reaction center subunit II, chloroplastic OS=Hordeum vulgare GN=psaD PE=1 SV=1	UNKNOWN	UNKNOWN	7.0,6.0,9.0,7.0,33.0,30.0,27.0,33.0,21.0,17.0,24.0,27.0,0.0,0.0,0.0,0.0,0.0,0.0,0.0,0.0,31.0,23.0,18.0,21.0,0.0,0.0,0.0,0.0,21.0,19.0,10.0,17.0,3.0,2.0,5.0,2.0,2.0,8.0,8.0,9.0,2.0,4.0,5.0,6.0
MG: Bacitracin synthase 2 OS=Bacillus licheniformis GN=bacB PE=3 SV=1 [O68007] Score: 410.0	UNKNOWN	5.1.1.12	0.0,0.0,0.0,0.0,0.0,0.0,0.0,0.0,0.0,0.0,0.0,0.0,0.0,0.0,0.0,0.0,0.0,0.0,0.0,0.0,0.0,0.0,0.0,0.0,0.0,0.0,0.0,0.0,0.0,0.0,0.0,0.0,0.0,0.0,0.0,0.0,0.0,0.0,1.0,0.0,9.0,21.0,9.0,23.0
ADEC3_RHIME Adenine deaminase 3 OS=Rhizobium meliloti (strain 1021) GN=ade3 PE=3 SV=1	K01486	3.5.4.2	0.0,0.0,0.0,0.0,0.0,0.0,0.0,0.0,0.0,0.0,0.0,0.0,0.0,0.0,0.0,0.0,0.0,0.0,0.0,0.0,0.0,0.0,0.0,0.0,0.0,0.0,0.0,0.0,1.0,0.0,0.0,0.0,0.0,0.0,0.0,0.0,0.0,0.0,0.0,0.0,0.0,0.0,0.0,0.0
AJAP1_HUMAN Adherens junction-associated protein 1 OS=Homo sapiens GN=AJAP1 PE=1 SV=1	UNKNOWN	UNKNOWN	0.0,0.0,0.0,0.0,0.0,0.0,0.0,0.0,0.0,0.0,0.0,0.0,0.0,0.0,0.0,0.0,0.0,0.0,0.0,0.0,0.0,0.0,0.0,0.0,0.0,0.0,0.0,0.0,0.0,0.0,0.0,0.0,0.0,0.0,1.0,0.0,0.0,0.0,0.0,0.0,0.0,0.0,0.0,0.0
DRG2_PHYBI Dermaseptin DRG2 OS=Phyllomedusa bicolor GN=DRG2 PE=2 SV=1	UNKNOWN	UNKNOWN	0.0,0.0,0.0,0.0,0.0,0.0,0.0,0.0,0.0,0.0,0.0,1.0,0.0,0.0,0.0,0.0,0.0,0.0,0.0,0.0,0.0,0.0,0.0,0.0,0.0,0.0,0.0,0.0,0.0,0.0,0.0,0.0,0.0,0.0,0.0,0.0,0.0,0.0,0.0,0.0,0.0,0.0,0.0,0.0
MG: UPF0200 protein Mbar_A0975 OS=Methanosarcina barkeri (strain Fusaro / DSM 804) GN=Mbar_A0975 PE=3 SV=1 [Q46DU5] Score: 332.0	UNKNOWN	UNKNOWN	0.0,0.0,0.0,0.0,2.0,0.0,8.0,4.0,1.0,1.0,0.0,0.0,0.0,0.0,0.0,0.0,0.0,0.0,0.0,0.0,0.0,0.0,0.0,0.0,0.0,0.0,0.0,0.0,0.0,0.0,0.0,0.0,0.0,0.0,0.0,0.0,0.0,0.0,0.0,0.0,0.0,0.0,0.0,0.0
MG: Phosphate acyltransferase OS=Exiguobacterium sp. (strain ATCC BAA-1283 / AT1b) GN=plsX PE=3 SV=1 [C4L5Z1] Score: 228.0	K03621	2.3.1.n2	0.0,0.0,3.0,4.0,0.0,0.0,1.0,0.0,0.0,0.0,0.0,1.0,1.0,1.0,1.0,2.0,0.0,0.0,0.0,0.0,0.0,0.0,0.0,0.0,2.0,2.0,0.0,1.0,0.0,0.0,0.0,0.0,0.0,0.0,0.0,1.0,0.0,0.0,0.0,0.0,0.0,0.0,0.0,0.0
MG: Protein trl OS=Helicobacter pylori (strain ATCC 700392 / 26695) GN=trl PE=4 SV=2 [O87326] Score: 58.9	UNKNOWN	UNKNOWN	0.0,0.0,0.0,0.0,19.0,9.0,16.0,17.0,31.0,19.0,29.0,21.0,0.0,0.0,0.0,0.0,0.0,0.0,0.0,0.0,18.0,17.0,10.0,28.0,0.0,0.0,0.0,0.0,13.0,7.0,6.0,7.0,4.0,7.0,5.0,6.0,18.0,16.0,63.0,67.0,0.0,2.0,2.0,15.0
ATPB_CYAME ATP synthase subunit beta, chloroplastic OS=Cyanidioschyzon merolae GN=atpB PE=3 SV=1	K02112	3.6.3.14	5.0,5.0,32.0,33.0,151.0,164.0,179.0,144.0,52.0,51.0,48.0,49.0,8.0,10.0,7.0,6.0,8.0,9.0,1.0,4.0,78.0,84.0,69.0,70.0,11.0,9.0,17.0,14.0,108.0,89.0,71.0,80.0,31.0,30.0,64.0,52.0,60.0,82.0,52.0,52.0,14.0,9.0,13.0,32.0
MG: 3-dehydroquinate synthase OS=Clostridium thermocellum (strain ATCC 27405 / DSM 1237 / NBRC 103400 / NCIMB 10682 / NRRL B-4536 / VPI 7372) GN=aroB PE=3 SV=1 [A3DDJ2] Score: 594.0	K01735	4.2.3.4	0.0,0.0,0.0,0.0,0.0,0.0,0.0,0.0,0.0,0.0,0.0,0.0,0.0,0.0,0.0,0.0,0.0,0.0,0.0,0.0,0.0,0.0,0.0,0.0,1.0,0.0,0.0,0.0,0.0,0.0,0.0,0.0,0.0,0.0,0.0,0.0,0.0,0.0,0.0,0.0,0.0,0.0,0.0,0.0
VNS2_MOUSE Vomeronasal secretory protein 2 OS=Mus musculus GN=Lcn4 PE=2 SV=1	UNKNOWN	UNKNOWN	0.0,0.0,0.0,0.0,0.0,0.0,0.0,0.0,0.0,0.0,0.0,0.0,0.0,0.0,0.0,0.0,0.0,0.0,0.0,0.0,0.0,1.0,0.0,0.0,0.0,0.0,0.0,0.0,0.0,0.0,0.0,0.0,0.0,0.0,0.0,0.0,0.0,0.0,0.0,0.0,0.0,0.0,0.0,0.0
CDKL1_HUMAN Cyclin-dependent kinase-like 1 OS=Homo sapiens GN=CDKL1 PE=1 SV=5	K08824	2.7.11.22	0.0,0.0,0.0,0.0,0.0,0.0,0.0,0.0,0.0,0.0,0.0,0.0,0.0,0.0,0.0,0.0,0.0,0.0,0.0,0.0,0.0,0.0,0.0,0.0,0.0,0.0,0.0,0.0,0.0,0.0,0.0,0.0,0.0,0.0,0.0,0.0,0.0,0.0,1.0,0.0,0.0,0.0,0.0,0.0
THI4_DESMR Putative thiazole biosynthetic enzyme OS=Desulfovibrio magneticus (strain ATCC 700980 / DSM 13731 / RS-1) GN=DMR_31420 PE=3 SV=1	K03146	UNKNOWN	0.0,0.0,0.0,0.0,0.0,0.0,0.0,2.0,1.0,1.0,0.0,0.0,0.0,0.0,0.0,1.0,0.0,0.0,0.0,0.0,0.0,0.0,0.0,0.0,0.0,0.0,0.0,0.0,0.0,0.0,0.0,0.0,0.0,0.0,0.0,0.0,0.0,0.0,0.0,0.0,0.0,0.0,0.0,0.0
MCP_SHV21 Major capsid protein OS=Saimiriine herpesvirus 2 (strain 11) GN=25 PE=3 SV=1	UNKNOWN	UNKNOWN	0.0,0.0,1.0,0.0,0.0,0.0,0.0,0.0,0.0,0.0,0.0,0.0,0.0,0.0,0.0,0.0,0.0,0.0,0.0,0.0,0.0,0.0,0.0,0.0,0.0,0.0,0.0,0.0,0.0,0.0,0.0,0.0,0.0,0.0,0.0,0.0,0.0,0.0,0.0,0.0,0.0,0.0,0.0,0.0
UGPC_RHOP5 sn-glycerol-3-phosphate import ATP-binding protein UgpC OS=Rhodopseudomonas palustris (strain BisA53) GN=ugpC PE=3 SV=1	K05816	3.6.3.20	38.0,29.0,34.0,15.0,0.0,42.0,41.0,48.0,40.0,8.0,49.0,34.0,215.0,199.0,192.0,159.0,184.0,180.0,260.0,201.0,73.0,76.0,91.0,99.0,7.0,0.0,3.0,2.0,50.0,59.0,43.0,47.0,12.0,11.0,2.0,24.0,20.0,6.0,13.0,0.0,0.0,46.0,12.0,0.0
LEXA_SYNFM LexA repressor OS=Syntrophobacter fumaroxidans (strain DSM 10017 / MPOB) GN=lexA PE=3 SV=1	K01356	3.4.21.88	0.0,0.0,0.0,0.0,0.0,0.0,0.0,0.0,1.0,0.0,0.0,0.0,0.0,0.0,0.0,0.0,0.0,0.0,0.0,0.0,0.0,0.0,0.0,0.0,0.0,0.0,0.0,0.0,0.0,0.0,0.0,0.0,0.0,0.0,0.0,0.0,0.0,0.0,0.0,0.0,0.0,0.0,0.0,0.0
MG: Acyl carrier protein OS=Cytophaga hutchinsonii (strain ATCC 33406 / NCIMB 9469) GN=acpP PE=3 SV=1 [Q11V97] Score: 125.0	K02078	UNKNOWN	0.0,0.0,0.0,0.0,3.0,1.0,10.0,5.0,0.0,0.0,2.0,2.0,0.0,0.0,0.0,0.0,0.0,0.0,0.0,0.0,0.0,0.0,0.0,0.0,0.0,0.0,0.0,0.0,0.0,0.0,0.0,0.0,0.0,0.0,1.0,1.0,0.0,0.0,0.0,0.0,0.0,0.0,0.0,0.0
MG: V-type ATP synthase subunit E OS=Methanosarcina barkeri (strain Fusaro / DSM 804) GN=atpE PE=3 SV=1 [Q46FH0] Score: 329.0	K02121	UNKNOWN	0.0,0.0,1.0,0.0,122.0,86.0,32.0,46.0,32.0,28.0,6.0,5.0,0.0,0.0,0.0,0.0,0.0,0.0,0.0,0.0,8.0,4.0,7.0,4.0,0.0,0.0,0.0,0.0,0.0,0.0,0.0,0.0,11.0,13.0,13.0,19.0,0.0,0.0,0.0,0.0,0.0,0.0,0.0,1.0
MG: UPF0092 membrane protein BH1229 OS=Bacillus halodurans (strain ATCC BAA-125 / DSM 18197 / FERM 7344 / JCM 9153 / C-125) GN=BH1229 PE=3 SV=1 [Q9KDI4] Score: 75.9	K03210	UNKNOWN	27.0,15.0,13.0,13.0,17.0,9.0,18.0,17.0,36.0,25.0,25.0,29.0,64.0,47.0,39.0,22.0,44.0,38.0,7.0,22.0,30.0,17.0,5.0,5.0,17.0,17.0,19.0,25.0,7.0,7.0,7.0,2.0,21.0,19.0,22.0,24.0,6.0,6.0,3.0,8.0,0.0,1.0,3.0,5.0
RS6_RHOCB 30S ribosomal protein S6 OS=Rhodobacter capsulatus (strain ATCC BAA-309 / NBRC 16581 / SB1003) GN=rpsF PE=3 SV=1	K02990	UNKNOWN	0.0,0.0,0.0,0.0,0.0,0.0,5.0,0.0,0.0,0.0,0.0,0.0,0.0,0.0,0.0,0.0,0.0,0.0,0.0,0.0,0.0,0.0,0.0,0.0,0.0,0.0,0.0,0.0,0.0,0.0,0.0,0.0,0.0,0.0,0.0,0.0,0.0,0.0,0.0,0.0,0.0,0.0,0.0,0.0
CAPP_SALPK Phosphoenolpyruvate carboxylase OS=Salmonella paratyphi A (strain AKU_12601) GN=ppc PE=3 SV=1	K01595	4.1.1.31	0.0,0.0,0.0,0.0,0.0,0.0,0.0,0.0,0.0,0.0,0.0,0.0,0.0,0.0,0.0,0.0,0.0,0.0,0.0,0.0,0.0,0.0,0.0,0.0,2.0,0.0,0.0,0.0,0.0,0.0,0.0,0.0,0.0,0.0,0.0,0.0,0.0,0.0,0.0,1.0,0.0,0.0,6.0,0.0
MG: Cellulose 1,4-beta-cellobiosidase OS=Clostridium thermocellum (strain ATCC 27405 / DSM 1237 / NBRC 103400 / NCIMB 10682 / NRRL B-4536 / VPI 7372) GN=celK PE=3 SV=1 [A3DCH1] Score: 226.0	UNKNOWN	3.2.1.91	38.0,46.0,112.0,41.0,1.0,16.0,19.0,59.0,6.0,27.0,49.0,37.0,32.0,6.0,19.0,13.0,1.0,4.0,11.0,11.0,10.0,33.0,11.0,16.0,5.0,2.0,14.0,3.0,1.0,62.0,12.0,30.0,5.0,7.0,38.0,57.0,214.0,68.0,5.0,0.0,0.0,0.0,0.0,0.0
HTPG_RHOP5 Chaperone protein HtpG OS=Rhodopseudomonas palustris (strain BisA53) GN=htpG PE=3 SV=1	K04079	UNKNOWN	0.0,1.0,0.0,0.0,0.0,0.0,0.0,0.0,0.0,0.0,1.0,0.0,0.0,0.0,0.0,0.0,0.0,0.0,0.0,0.0,0.0,0.0,0.0,0.0,0.0,0.0,0.0,0.0,0.0,0.0,0.0,0.0,0.0,0.0,0.0,0.0,0.0,0.0,0.0,0.0,0.0,0.0,0.0,0.0
MUTS_LACH4 DNA mismatch repair protein MutS OS=Lactobacillus helveticus (strain DPC 4571) GN=mutS PE=3 SV=1	K03555	UNKNOWN	0.0,0.0,0.0,0.0,0.0,0.0,0.0,0.0,0.0,0.0,0.0,0.0,0.0,0.0,0.0,0.0,0.0,0.0,0.0,0.0,0.0,1.0,0.0,0.0,0.0,0.0,0.0,0.0,0.0,0.0,0.0,0.0,0.0,0.0,0.0,0.0,0.0,0.0,1.0,0.0,0.0,0.0,0.0,0.0
MG: Methionine import ATP-binding protein MetN OS=Peptoclostridium difficile (strain 630) GN=metN PE=3 SV=1 [Q18C09] Score: 164.0	K02071	3.6.3.-	0.0,0.0,0.0,0.0,0.0,0.0,0.0,0.0,0.0,0.0,0.0,0.0,0.0,0.0,0.0,0.0,0.0,0.0,0.0,0.0,0.0,0.0,7.0,0.0,0.0,0.0,0.0,0.0,0.0,0.0,0.0,0.0,0.0,0.0,0.0,0.0,0.0,0.0,2.0,0.0,0.0,0.0,0.0,1.0
MG: 3-oxoacyl-[acyl-carrier-protein] reductase FabG OS=Haemophilus influenzae (strain ATCC 51907 / DSM 11121 / KW20 / Rd) GN=fabG PE=3 SV=1 [P43713] Score: 261.0	K00059	1.1.1.100	0.0,0.0,0.0,0.0,0.0,0.0,0.0,0.0,0.0,0.0,0.0,0.0,0.0,0.0,0.0,0.0,0.0,0.0,1.0,0.0,0.0,0.0,0.0,0.0,0.0,0.0,0.0,0.0,0.0,0.0,0.0,0.0,0.0,0.0,0.0,0.0,0.0,0.0,0.0,0.0,0.0,0.0,0.0,0.0
MG: Serine/threonine-protein kinase PrkC OS=Staphylococcus aureus (strain Newman) GN=prkC PE=1 SV=1 [A6QGC0] Score: 85.1	K12132	2.7.11.1	0.0,0.0,0.0,0.0,0.0,0.0,0.0,0.0,0.0,0.0,0.0,0.0,0.0,2.0,0.0,0.0,0.0,0.0,0.0,0.0,0.0,0.0,0.0,0.0,0.0,0.0,0.0,0.0,0.0,0.0,0.0,0.0,0.0,0.0,0.0,0.0,0.0,0.0,0.0,0.0,0.0,0.0,0.0,0.0
MG: Formate dehydrogenase 2 subunit alpha (cytochrome c-553) OS=Desulfovibrio vulgaris (strain Hildenborough / ATCC 29579 / NCIMB 8303) GN=fdnG-3 PE=1 SV=2 [Q727P3] Score: 183.0	K00123	1.2.2.3	0.0,0.0,0.0,0.0,5.0,2.0,11.0,16.0,0.0,0.0,0.0,0.0,0.0,0.0,0.0,0.0,0.0,0.0,0.0,0.0,0.0,1.0,0.0,0.0,16.0,18.0,14.0,19.0,0.0,0.0,3.0,2.0,0.0,2.0,4.0,0.0,11.0,10.0,0.0,1.0,0.0,0.0,0.0,0.0
CHK1_RAT Serine/threonine-protein kinase Chk1 OS=Rattus norvegicus GN=Chek1 PE=2 SV=1	K02216	2.7.11.1	0.0,0.0,0.0,0.0,1.0,0.0,0.0,0.0,0.0,0.0,0.0,0.0,0.0,0.0,0.0,0.0,0.0,0.0,0.0,0.0,0.0,0.0,0.0,0.0,0.0,0.0,0.0,0.0,0.0,0.0,0.0,0.0,0.0,0.0,0.0,0.0,0.0,0.0,0.0,0.0,0.0,0.0,0.0,0.0
ANPY_PSEAM Ice-structuring protein OS=Pseudopleuronectes americanus PE=3 SV=1	UNKNOWN	UNKNOWN	0.0,0.0,0.0,0.0,0.0,0.0,0.0,0.0,0.0,0.0,0.0,1.0,0.0,0.0,0.0,0.0,0.0,0.0,0.0,0.0,0.0,0.0,0.0,0.0,0.0,0.0,0.0,0.0,0.0,0.0,0.0,0.0,0.0,0.0,0.0,0.0,0.0,0.0,0.0,0.0,0.0,0.0,0.0,0.0
NFYA5_ARATH Nuclear transcription factor Y subunit A-5 OS=Arabidopsis thaliana GN=NFYA5 PE=2 SV=1	K08064	UNKNOWN	0.0,0.0,0.0,0.0,0.0,0.0,0.0,0.0,0.0,0.0,0.0,0.0,0.0,1.0,2.0,0.0,1.0,1.0,0.0,0.0,0.0,0.0,0.0,0.0,0.0,0.0,0.0,0.0,0.0,0.0,0.0,0.0,0.0,0.0,0.0,0.0,0.0,0.0,0.0,0.0,0.0,0.0,0.0,0.0
MG: Acetate kinase OS=Methanosarcina thermophila GN=ackA PE=1 SV=1 [P38502] Score: 406.0	K00925	2.7.2.1	0.0,0.0,0.0,0.0,8.0,3.0,60.0,49.0,21.0,30.0,3.0,3.0,0.0,1.0,0.0,0.0,0.0,0.0,0.0,0.0,10.0,8.0,5.0,7.0,0.0,0.0,0.0,0.0,0.0,0.0,0.0,0.0,1.0,0.0,0.0,2.0,0.0,0.0,0.0,0.0,0.0,0.0,0.0,0.0
CSLF7_ORYSJ Probable mixed-linked glucan synthase 7 OS=Oryza sativa subsp. japonica GN=CSLF7 PE=1 SV=1	UNKNOWN	2.4.1.-	0.0,0.0,0.0,0.0,0.0,0.0,0.0,0.0,0.0,0.0,0.0,0.0,0.0,0.0,0.0,0.0,0.0,0.0,0.0,0.0,0.0,0.0,0.0,0.0,0.0,0.0,0.0,1.0,0.0,0.0,0.0,0.0,0.0,0.0,0.0,0.0,0.0,0.0,0.0,0.0,0.0,0.0,0.0,0.0
RS4_DESDA 30S ribosomal protein S4 OS=Desulfovibrio desulfuricans (strain ATCC 27774 / DSM 6949) GN=rpsD PE=3 SV=1	K02986	UNKNOWN	5.0,3.0,5.0,3.0,9.0,14.0,13.0,14.0,2.0,0.0,0.0,0.0,52.0,34.0,29.0,11.0,18.0,6.0,8.0,12.0,4.0,2.0,0.0,1.0,7.0,4.0,2.0,1.0,1.0,18.0,1.0,1.0,2.0,2.0,5.0,4.0,23.0,1.0,0.0,0.0,0.0,0.0,0.0,0.0
MG: Dihydrofolate reductase OS=Bacillus subtilis (strain 168) GN=dfrA PE=1 SV=2 [P11045] Score: 92.8	K00287	1.5.1.3	0.0,0.0,0.0,0.0,0.0,0.0,0.0,1.0,0.0,0.0,0.0,0.0,0.0,0.0,0.0,0.0,0.0,0.0,0.0,0.0,0.0,0.0,0.0,0.0,0.0,0.0,0.0,0.0,0.0,0.0,0.0,0.0,0.0,0.0,0.0,0.0,0.0,0.0,0.0,0.0,0.0,0.0,0.0,0.0
RECA_THEAQ Protein RecA OS=Thermus aquaticus GN=recA PE=3 SV=1	UNKNOWN	UNKNOWN	0.0,0.0,0.0,0.0,0.0,0.0,0.0,0.0,0.0,1.0,0.0,0.0,15.0,13.0,18.0,11.0,8.0,8.0,0.0,6.0,14.0,14.0,16.0,14.0,0.0,1.0,0.0,0.0,0.0,0.0,0.0,0.0,0.0,0.0,0.0,0.0,0.0,0.0,0.0,0.0,0.0,0.0,3.0,0.0
MG: Dehydrogenase/reductase SDR family member 4 (Fragment) OS=Oryctolagus cuniculus GN=DHRS4 PE=1 SV=1 [Q9GKX2] Score: 176.0	UNKNOWN	1.1.1.184	0.0,0.0,0.0,0.0,0.0,0.0,1.0,0.0,3.0,4.0,6.0,3.0,4.0,0.0,3.0,0.0,4.0,3.0,0.0,0.0,0.0,0.0,0.0,0.0,0.0,0.0,0.0,0.0,0.0,0.0,0.0,0.0,1.0,2.0,4.0,4.0,0.0,0.0,2.0,0.0,0.0,0.0,0.0,0.0
MG: Benzylsuccinate synthase alpha subunit OS=Thauera aromatica GN=bssA PE=1 SV=1 [O87943] Score: 191.0	K07540	4.1.99.11	0.0,0.0,0.0,0.0,0.0,0.0,0.0,0.0,0.0,0.0,0.0,0.0,0.0,0.0,0.0,0.0,0.0,0.0,0.0,3.0,0.0,0.0,0.0,0.0,0.0,0.0,0.0,0.0,0.0,0.0,0.0,0.0,0.0,0.0,0.0,0.0,0.0,0.0,0.0,0.0,0.0,0.0,0.0,0.0
VATC_DROME V-type proton ATPase subunit C OS=Drosophila melanogaster GN=Vha44 PE=2 SV=5	K02148	UNKNOWN	0.0,0.0,0.0,0.0,0.0,0.0,0.0,0.0,0.0,0.0,0.0,0.0,0.0,0.0,0.0,0.0,0.0,0.0,0.0,0.0,0.0,0.0,0.0,0.0,1.0,0.0,0.0,0.0,0.0,0.0,0.0,0.0,0.0,0.0,0.0,0.0,0.0,0.0,0.0,0.0,0.0,0.0,0.0,0.0
MG: Uncharacterized oxidoreductase SERP2049 OS=Staphylococcus epidermidis (strain ATCC 35984 / RP62A) GN=SERP2049 PE=3 SV=1 [Q5HLD8] Score: 86.3	UNKNOWN	1.-.-.-	0.0,0.0,0.0,0.0,0.0,0.0,0.0,0.0,0.0,0.0,0.0,0.0,2.0,0.0,0.0,0.0,0.0,0.0,0.0,0.0,0.0,0.0,0.0,0.0,0.0,0.0,0.0,0.0,0.0,0.0,0.0,0.0,0.0,0.0,0.0,0.0,0.0,0.0,0.0,0.0,0.0,0.0,0.0,0.0
MG: Pyruvate-flavodoxin oxidoreductase OS=Anabaena variabilis (strain ATCC 29413 / PCC 7937) GN=nifJ PE=3 SV=1 [Q3M8N0] Score: 857.0	K03737	1.2.7.-	261.0,240.0,122.0,88.0,162.0,148.0,384.0,417.0,209.0,260.0,156.0,231.0,1002.0,797.0,1240.0,917.0,987.0,1210.0,735.0,696.0,212.0,259.0,274.0,350.0,298.0,266.0,309.0,217.0,124.0,139.0,112.0,167.0,217.0,169.0,309.0,244.0,109.0,97.0,259.0,236.0,5.0,35.0,13.0,57.0
RS16_ORYSJ 40S ribosomal protein S16 OS=Oryza sativa subsp. japonica GN=RPS16A PE=2 SV=1	UNKNOWN	UNKNOWN	0.0,0.0,0.0,0.0,0.0,0.0,0.0,2.0,0.0,0.0,0.0,0.0,0.0,0.0,0.0,0.0,0.0,0.0,0.0,0.0,0.0,0.0,0.0,0.0,0.0,0.0,0.0,0.0,0.0,0.0,0.0,0.0,0.0,0.0,0.0,0.0,0.0,0.0,0.0,0.0,0.0,0.0,0.0,0.0
HSP82_ASHGO Heat shock protein HSP82 OS=Ashbya gossypii (strain ATCC 10895 / CBS 109.51 / FGSC 9923 / NRRL Y-1056) GN=HSP82 PE=3 SV=1	K04079	UNKNOWN	0.0,0.0,0.0,0.0,0.0,0.0,0.0,0.0,0.0,0.0,1.0,0.0,0.0,0.0,0.0,0.0,0.0,0.0,0.0,0.0,0.0,0.0,0.0,0.0,0.0,0.0,0.0,0.0,0.0,0.0,0.0,0.0,0.0,0.0,0.0,0.0,0.0,0.0,0.0,0.0,0.0,0.0,0.0,0.0
E2AKB_CAEEL Eukaryotic translation initiation factor 2-alpha kinase gcn-2 OS=Caenorhabditis elegans GN=gcn-2 PE=1 SV=2	K16196	2.7.11.1	0.0,0.0,0.0,0.0,0.0,0.0,0.0,0.0,0.0,0.0,0.0,0.0,0.0,0.0,1.0,0.0,0.0,0.0,0.0,0.0,0.0,0.0,0.0,0.0,0.0,0.0,0.0,0.0,0.0,0.0,0.0,0.0,0.0,0.0,0.0,0.0,0.0,0.0,0.0,0.0,0.0,0.0,0.0,0.0
REV_HV2SB Protein Rev OS=Human immunodeficiency virus type 2 subtype A (isolate SBLISY) GN=rev PE=3 SV=1	UNKNOWN	UNKNOWN	0.0,0.0,0.0,0.0,0.0,0.0,0.0,0.0,0.0,0.0,0.0,0.0,0.0,0.0,0.0,0.0,0.0,0.0,0.0,0.0,0.0,0.0,0.0,0.0,0.0,0.0,0.0,0.0,0.0,0.0,0.0,1.0,0.0,0.0,0.0,0.0,0.0,0.0,0.0,0.0,0.0,0.0,0.0,0.0
RS12_METBU 30S ribosomal protein S12 OS=Methanococcoides burtonii (strain DSM 6242 / NBRC 107633 / OCM 468 / ACE-M) GN=rps12 PE=3 SV=1	K02950	UNKNOWN	0.0,0.0,0.0,0.0,10.0,0.0,10.0,7.0,4.0,3.0,1.0,0.0,0.0,0.0,0.0,0.0,0.0,0.0,0.0,0.0,0.0,0.0,0.0,0.0,0.0,0.0,0.0,0.0,0.0,0.0,0.0,0.0,0.0,0.0,0.0,0.0,0.0,0.0,0.0,0.0,0.0,0.0,0.0,0.0
RL29_LISW6 50S ribosomal protein L29 OS=Listeria welshimeri serovar 6b (strain ATCC 35897 / DSM 20650 / SLCC5334) GN=rpmC PE=3 SV=1	K02904	UNKNOWN	0.0,0.0,0.0,0.0,3.0,6.0,9.0,9.0,5.0,7.0,5.0,5.0,6.0,8.0,6.0,8.0,7.0,7.0,0.0,4.0,17.0,13.0,13.0,16.0,2.0,5.0,7.0,7.0,8.0,6.0,9.0,8.0,8.0,6.0,7.0,8.0,43.0,40.0,4.0,6.0,2.0,3.0,17.0,4.0
MG: UPF0296 protein NT01CX_2250 OS=Clostridium novyi (strain NT) GN=NT01CX_2250 PE=3 SV=1 [A0Q121] Score: 163.0	K09777	UNKNOWN	0.0,0.0,0.0,0.0,47.0,41.0,22.0,23.0,56.0,49.0,34.0,31.0,37.0,39.0,22.0,9.0,21.0,25.0,1.0,3.0,22.0,19.0,16.0,20.0,3.0,20.0,16.0,22.0,17.0,6.0,15.0,18.0,27.0,27.0,25.0,30.0,13.0,20.0,15.0,26.0,5.0,4.0,13.0,18.0
KAD_STRP8 Adenylate kinase OS=Streptococcus pyogenes serotype M18 (strain MGAS8232) GN=adk PE=3 SV=1	K00939	2.7.4.3	0.0,0.0,0.0,0.0,0.0,0.0,0.0,0.0,0.0,0.0,0.0,0.0,0.0,0.0,0.0,0.0,0.0,0.0,0.0,1.0,0.0,0.0,0.0,0.0,0.0,0.0,0.0,0.0,0.0,0.0,0.0,0.0,0.0,0.0,0.0,0.0,0.0,0.0,2.0,0.0,0.0,0.0,5.0,0.0
MG: Stage V sporulation protein AD OS=Bacillus subtilis (strain 168) GN=spoVAD PE=1 SV=1 [P40869] Score: 311.0	K06406	UNKNOWN	0.0,0.0,0.0,0.0,0.0,0.0,0.0,0.0,2.0,1.0,1.0,1.0,0.0,0.0,0.0,0.0,0.0,0.0,0.0,0.0,0.0,0.0,0.0,0.0,0.0,0.0,1.0,0.0,0.0,0.0,0.0,0.0,1.0,0.0,0.0,0.0,0.0,0.0,0.0,0.0,0.0,0.0,0.0,0.0
GATB_RICCO Glutamyl-tRNA(Gln) amidotransferase subunit B, chloroplastic/mitochondrial OS=Ricinus communis GN=GATB PE=3 SV=1	K02434	6.3.5.-	0.0,0.0,0.0,0.0,0.0,0.0,0.0,1.0,0.0,0.0,0.0,0.0,0.0,0.0,0.0,0.0,0.0,0.0,0.0,0.0,0.0,0.0,0.0,0.0,0.0,0.0,0.0,0.0,0.0,0.0,0.0,0.0,0.0,0.0,0.0,0.0,0.0,0.0,0.0,0.0,0.0,0.0,0.0,0.0
SAS2_SPOUR Small, acid-soluble spore protein 2 OS=Sporosarcina ureae GN=Su-2 PE=3 SV=1	UNKNOWN	UNKNOWN	0.0,0.0,0.0,0.0,2.0,7.0,3.0,4.0,8.0,3.0,1.0,7.0,7.0,2.0,3.0,2.0,2.0,1.0,1.0,12.0,3.0,5.0,4.0,9.0,0.0,1.0,1.0,1.0,2.0,2.0,0.0,0.0,0.0,2.0,5.0,4.0,9.0,14.0,2.0,1.0,0.0,0.0,0.0,0.0
SUS4_ARATH Sucrose synthase 4 OS=Arabidopsis thaliana GN=SUS4 PE=1 SV=1	K00695	2.4.1.13	0.0,0.0,0.0,0.0,14.0,13.0,2.0,3.0,3.0,2.0,1.0,1.0,7.0,5.0,4.0,0.0,4.0,5.0,0.0,0.0,3.0,1.0,0.0,1.0,0.0,0.0,0.0,1.0,2.0,0.0,1.0,1.0,0.0,0.0,7.0,2.0,0.0,0.0,3.0,7.0,2.0,0.0,1.0,2.0
MG: Plexin-A1 OS=Homo sapiens GN=PLXNA1 PE=1 SV=3 [Q9UIW2] Score: 55.8	K06820	UNKNOWN	0.0,0.0,0.0,0.0,0.0,0.0,0.0,0.0,0.0,0.0,1.0,0.0,0.0,0.0,0.0,0.0,0.0,0.0,0.0,0.0,0.0,0.0,0.0,1.0,0.0,0.0,0.0,0.0,0.0,0.0,0.0,0.0,0.0,0.0,0.0,0.0,0.0,0.0,0.0,0.0,0.0,0.0,0.0,0.0
MG: Thioredoxin OS=Staphylococcus aureus GN=trxA PE=1 SV=1 [P0A0K6] Score: 118.0	UNKNOWN	UNKNOWN	0.0,0.0,0.0,0.0,3.0,3.0,14.0,20.0,31.0,34.0,35.0,29.0,13.0,12.0,11.0,20.0,18.0,11.0,0.0,18.0,9.0,11.0,6.0,8.0,0.0,0.0,0.0,0.0,0.0,2.0,0.0,0.0,2.0,2.0,9.0,4.0,7.0,5.0,8.0,13.0,0.0,0.0,0.0,4.0
MG: 30S ribosomal protein S11 OS=Methanosphaera stadtmanae (strain ATCC 43021 / DSM 3091 / JCM 11832 / MCB-3) GN=rps11 PE=3 SV=1 [Q2NFZ5] Score: 211.0	K02948	UNKNOWN	12.0,11.0,5.0,4.0,6.0,3.0,5.0,3.0,0.0,0.0,0.0,0.0,0.0,0.0,0.0,0.0,2.0,0.0,0.0,0.0,4.0,1.0,5.0,3.0,0.0,0.0,0.0,0.0,0.0,4.0,3.0,2.0,1.0,0.0,4.0,6.0,0.0,0.0,1.0,1.0,0.0,0.0,0.0,0.0
RECF_MYCA1 DNA replication and repair protein RecF OS=Mycobacterium avium (strain 104) GN=recF PE=3 SV=1	K03629	UNKNOWN	0.0,0.0,0.0,0.0,0.0,0.0,0.0,0.0,0.0,0.0,0.0,0.0,0.0,0.0,0.0,0.0,1.0,0.0,0.0,0.0,0.0,0.0,0.0,0.0,0.0,0.0,0.0,0.0,0.0,0.0,0.0,0.0,0.0,0.0,0.0,0.0,0.0,0.0,0.0,0.0,0.0,0.0,0.0,0.0
MG: Spermidine/putrescine import ATP-binding protein PotA OS=Shigella flexneri serotype 5b (strain 8401) GN=potA PE=3 SV=1 [Q0T5R2] Score: 120.0	K11072	3.6.3.31	0.0,0.0,0.0,0.0,0.0,1.0,0.0,0.0,0.0,0.0,0.0,0.0,0.0,1.0,0.0,0.0,1.0,0.0,0.0,0.0,0.0,0.0,0.0,0.0,0.0,1.0,0.0,0.0,0.0,0.0,0.0,3.0,0.0,0.0,0.0,0.0,0.0,1.0,3.0,3.0,0.0,0.0,1.0,0.0
PYRR_AKKM8 Bifunctional protein PyrR OS=Akkermansia muciniphila (strain ATCC BAA-835 / Muc) GN=pyrR PE=3 SV=1	K02825	2.4.2.9	0.0,0.0,0.0,0.0,0.0,0.0,0.0,0.0,0.0,0.0,0.0,0.0,13.0,11.0,8.0,8.0,12.0,4.0,0.0,3.0,0.0,0.0,0.0,0.0,1.0,2.0,0.0,0.0,0.0,0.0,0.0,0.0,0.0,0.0,0.0,0.0,0.0,0.0,0.0,0.0,0.0,0.0,0.0,0.0
MG: Uncharacterized ABC transporter ATP-binding protein MJ0035 OS=Methanocaldococcus jannaschii (strain ATCC 43067 / DSM 2661 / JAL-1 / JCM 10045 / NBRC 100440) GN=MJ0035 PE=3 SV=1 [Q60350] Score: 275.0	K09013	UNKNOWN	0.0,0.0,0.0,0.0,29.0,11.0,44.0,6.0,7.0,5.0,5.0,3.0,0.0,0.0,0.0,0.0,0.0,0.0,0.0,0.0,0.0,0.0,0.0,0.0,0.0,0.0,0.0,1.0,0.0,0.0,0.0,0.0,0.0,0.0,2.0,0.0,0.0,0.0,0.0,0.0,0.0,0.0,0.0,1.0
MG: Regulator of nucleoside diphosphate kinase OS=Escherichia coli O157:H7 GN=rnk PE=3 SV=1 [P0AFW6] Score: 71.2	K06140	UNKNOWN	0.0,0.0,0.0,0.0,2.0,2.0,3.0,3.0,0.0,0.0,0.0,0.0,0.0,0.0,0.0,0.0,0.0,0.0,0.0,0.0,0.0,0.0,0.0,0.0,0.0,0.0,0.0,0.0,0.0,0.0,0.0,0.0,0.0,0.0,0.0,0.0,0.0,0.0,3.0,2.0,0.0,0.0,0.0,0.0
TBB6_BOVIN Tubulin beta-6 chain OS=Bos taurus GN=TUBB6 PE=2 SV=1	K07375	UNKNOWN	0.0,0.0,0.0,0.0,0.0,0.0,0.0,0.0,0.0,0.0,8.0,0.0,0.0,0.0,0.0,0.0,0.0,0.0,0.0,0.0,0.0,0.0,0.0,0.0,0.0,0.0,0.0,0.0,0.0,0.0,0.0,0.0,0.0,0.0,0.0,0.0,0.0,0.0,0.0,0.0,0.0,0.0,0.0,0.0
RBSK_SCHPO Putative ribokinase OS=Schizosaccharomyces pombe (strain 972 / ATCC 24843) GN=SPBC16G5.02c PE=3 SV=1	K00852	2.7.1.15	1.0,0.0,0.0,0.0,0.0,0.0,0.0,0.0,1.0,2.0,3.0,2.0,0.0,1.0,2.0,0.0,0.0,2.0,0.0,0.0,0.0,0.0,0.0,0.0,2.0,0.0,0.0,0.0,0.0,0.0,0.0,1.0,0.0,0.0,0.0,0.0,0.0,0.0,0.0,0.0,0.0,0.0,0.0,0.0
MG: Uncharacterized protein MJ0778 OS=Methanocaldococcus jannaschii (strain ATCC 43067 / DSM 2661 / JAL-1 / JCM 10045 / NBRC 100440) GN=MJ0778 PE=4 SV=1 [Q58188] Score: 50.1	K06950	UNKNOWN	0.0,0.0,0.0,0.0,0.0,0.0,0.0,0.0,0.0,0.0,0.0,0.0,0.0,0.0,0.0,0.0,0.0,0.0,0.0,0.0,0.0,0.0,0.0,0.0,0.0,0.0,0.0,0.0,0.0,0.0,0.0,0.0,0.0,0.0,0.0,0.0,0.0,0.0,0.0,0.0,0.0,0.0,1.0,0.0
MG: 3-dehydroquinate dehydratase OS=Halothermothrix orenii (strain H 168 / OCM 544 / DSM 9562) GN=aroQ PE=3 SV=1 [B8D2E3] Score: 211.0	K03786	4.2.1.10	0.0,0.0,0.0,0.0,0.0,0.0,0.0,0.0,0.0,0.0,0.0,0.0,0.0,0.0,1.0,0.0,2.0,0.0,0.0,0.0,0.0,0.0,0.0,0.0,0.0,0.0,0.0,0.0,0.0,0.0,0.0,0.0,0.0,0.0,0.0,0.0,0.0,0.0,0.0,0.0,0.0,0.0,0.0,0.0
MG: Bifunctional protein PyrR OS=Streptococcus mutans serotype c (strain ATCC 700610 / UA159) GN=pyrR PE=3 SV=1 [Q8DUP7] Score: 165.0	K02825	2.4.2.9	4.0,3.0,8.0,0.0,5.0,0.0,0.0,0.0,3.0,0.0,1.0,1.0,15.0,16.0,10.0,11.0,18.0,10.0,2.0,3.0,0.0,0.0,0.0,0.0,1.0,2.0,0.0,0.0,0.0,0.0,1.0,1.0,3.0,8.0,0.0,0.0,0.0,0.0,6.0,14.0,0.0,0.0,0.0,0.0
MG: Collagen alpha-5(VI) chain OS=Homo sapiens GN=COL6A5 PE=1 SV=1 [A8TX70] Score: 52.8	K06238	UNKNOWN	0.0,0.0,0.0,0.0,1.0,0.0,0.0,0.0,0.0,0.0,0.0,0.0,0.0,0.0,0.0,0.0,0.0,0.0,0.0,0.0,0.0,0.0,0.0,0.0,0.0,0.0,0.0,0.0,0.0,0.0,0.0,0.0,0.0,0.0,0.0,0.0,0.0,0.0,0.0,0.0,0.0,0.0,0.0,0.0
TYPH_MOUSE Thymidine phosphorylase OS=Mus musculus GN=Tymp PE=2 SV=1	K00758	2.4.2.4	0.0,0.0,0.0,0.0,0.0,0.0,0.0,0.0,0.0,0.0,0.0,0.0,0.0,0.0,0.0,0.0,0.0,0.0,0.0,0.0,0.0,0.0,0.0,0.0,0.0,0.0,0.0,0.0,0.0,0.0,1.0,0.0,0.0,0.0,0.0,0.0,1.0,0.0,0.0,0.0,0.0,0.0,0.0,0.0
UBE2H_BOVIN Ubiquitin-conjugating enzyme E2 H OS=Bos taurus GN=UBE2H PE=2 SV=1	K10576	2.3.2.23,2.3.2.24	0.0,0.0,0.0,0.0,0.0,0.0,0.0,0.0,0.0,0.0,0.0,0.0,0.0,0.0,0.0,0.0,0.0,0.0,1.0,0.0,0.0,0.0,0.0,0.0,0.0,0.0,0.0,0.0,0.0,0.0,0.0,0.0,0.0,0.0,0.0,0.0,0.0,0.0,0.0,0.0,0.0,0.0,0.0,0.0
PKS33_DICDI Probable polyketide synthase 33 OS=Dictyostelium discoideum GN=pks33 PE=3 SV=2	UNKNOWN	2.3.1.-	0.0,0.0,0.0,0.0,0.0,0.0,0.0,0.0,0.0,0.0,0.0,0.0,1.0,0.0,0.0,0.0,0.0,0.0,0.0,0.0,0.0,0.0,0.0,0.0,0.0,0.0,0.0,0.0,0.0,0.0,0.0,0.0,0.0,0.0,0.0,0.0,0.0,0.0,0.0,1.0,0.0,0.0,0.0,0.0
GEPH_CHICK Gephyrin OS=Gallus gallus GN=GPHN PE=1 SV=1	UNKNOWN	2.10.1.1,2.7.7.75	0.0,0.0,0.0,0.0,0.0,0.0,0.0,0.0,0.0,0.0,0.0,0.0,0.0,0.0,0.0,0.0,0.0,0.0,0.0,0.0,0.0,0.0,0.0,0.0,0.0,0.0,0.0,0.0,0.0,0.0,0.0,0.0,0.0,0.0,1.0,0.0,0.0,0.0,0.0,0.0,0.0,0.0,0.0,0.0
CO1A1_TAPTE Collagen alpha-1(I) chain (Fragments) OS=Tapirus terrestris GN=COL1A1 PE=1 SV=1	UNKNOWN	UNKNOWN	0.0,0.0,0.0,0.0,0.0,0.0,0.0,0.0,0.0,0.0,0.0,0.0,0.0,0.0,0.0,0.0,0.0,0.0,0.0,0.0,0.0,0.0,0.0,0.0,0.0,0.0,0.0,0.0,0.0,0.0,0.0,0.0,1.0,0.0,1.0,0.0,0.0,1.0,0.0,0.0,0.0,0.0,12.0,0.0
SYE2_ANAPZ Glutamate--tRNA ligase 2 OS=Anaplasma phagocytophilum (strain HZ) GN=gltX2 PE=3 SV=1	K01885	6.1.1.17	0.0,0.0,0.0,0.0,0.0,1.0,0.0,0.0,0.0,0.0,0.0,0.0,0.0,0.0,2.0,0.0,0.0,2.0,0.0,0.0,0.0,0.0,0.0,0.0,0.0,1.0,1.0,0.0,0.0,0.0,1.0,3.0,0.0,0.0,6.0,6.0,1.0,4.0,1.0,1.0,0.0,0.0,0.0,0.0
MG: UDP-2-acetamido-2-deoxy-3-oxo-D-glucuronate aminotransferase OS=Pseudomonas aeruginosa (strain ATCC 15692 / PAO1 / 1C / PRS 101 / LMG 12228) GN=wbpE PE=1 SV=1 [Q9HZ76] Score: 336.0	K13017	2.6.1.98	0.0,0.0,0.0,0.0,0.0,0.0,0.0,0.0,6.0,6.0,7.0,6.0,0.0,0.0,0.0,0.0,0.0,0.0,0.0,0.0,0.0,0.0,0.0,0.0,0.0,0.0,0.0,0.0,0.0,0.0,0.0,1.0,1.0,1.0,7.0,7.0,1.0,1.0,3.0,2.0,0.0,0.0,0.0,0.0
MG: DNA ligase OS=Serratia proteamaculans (strain 568) GN=ligA PE=3 SV=1 [A8GHF2] Score: 246.0	K01972	6.5.1.2	0.0,0.0,0.0,0.0,1.0,0.0,0.0,0.0,0.0,0.0,0.0,0.0,1.0,0.0,0.0,1.0,0.0,0.0,0.0,1.0,0.0,0.0,0.0,0.0,0.0,0.0,0.0,0.0,0.0,0.0,0.0,0.0,0.0,0.0,1.0,0.0,0.0,0.0,1.0,0.0,0.0,0.0,0.0,0.0
MG: Capsular polysaccharide biosynthesis protein CapF OS=Staphylococcus aureus GN=capF PE=3 SV=1 [P39855] Score: 51.6	UNKNOWN	UNKNOWN	0.0,0.0,0.0,0.0,0.0,0.0,0.0,0.0,0.0,0.0,0.0,0.0,1.0,0.0,0.0,0.0,0.0,0.0,0.0,0.0,0.0,0.0,0.0,0.0,0.0,0.0,0.0,0.0,0.0,0.0,0.0,0.0,0.0,0.0,0.0,0.0,0.0,0.0,0.0,0.0,0.0,0.0,0.0,0.0
MG: tRNA-specific 2-thiouridylase MnmA OS=Roseiflexus sp. (strain RS-1) GN=mnmA PE=3 SV=1 [A5UV64] Score: 222.0	K00566	2.8.1.13	0.0,0.0,0.0,0.0,0.0,0.0,0.0,0.0,0.0,0.0,0.0,0.0,0.0,0.0,0.0,0.0,0.0,0.0,0.0,0.0,0.0,0.0,0.0,0.0,0.0,0.0,0.0,0.0,0.0,0.0,0.0,0.0,0.0,1.0,1.0,0.0,0.0,0.0,0.0,0.0,0.0,0.0,0.0,0.0
MG: Proline--tRNA ligase OS=Alkaliphilus oremlandii (strain OhILAs) GN=proS PE=3 SV=1 [A8MLB3] Score: 543.0	K01881	6.1.1.15	0.0,0.0,0.0,0.0,0.0,0.0,0.0,0.0,0.0,0.0,0.0,0.0,0.0,0.0,0.0,0.0,0.0,0.0,0.0,0.0,0.0,0.0,0.0,0.0,0.0,0.0,0.0,0.0,0.0,0.0,0.0,0.0,0.0,0.0,0.0,0.0,0.0,0.0,2.0,0.0,0.0,0.0,0.0,0.0
MG: Methylcobamide:CoM methyltransferase MtbA OS=Methanosarcina acetivorans (strain ATCC 35395 / DSM 2834 / JCM 12185 / C2A) GN=mtbA PE=3 SV=2 [P58869] Score: 641.0	K14082	2.1.1.247	0.0,0.0,0.0,0.0,10.0,10.0,64.0,53.0,36.0,42.0,13.0,11.0,0.0,0.0,2.0,0.0,0.0,0.0,0.0,0.0,0.0,0.0,0.0,0.0,1.0,0.0,0.0,0.0,1.0,0.0,0.0,0.0,0.0,1.0,0.0,3.0,0.0,0.0,1.0,0.0,0.0,1.0,0.0,0.0
UVRB_CUPPJ UvrABC system protein B OS=Cupriavidus pinatubonensis (strain JMP 134 / LMG 1197) GN=uvrB PE=3 SV=1	K03702	UNKNOWN	0.0,2.0,0.0,0.0,0.0,0.0,1.0,0.0,0.0,0.0,0.0,0.0,0.0,0.0,0.0,1.0,0.0,0.0,0.0,1.0,0.0,0.0,0.0,0.0,1.0,0.0,0.0,0.0,0.0,0.0,0.0,0.0,0.0,0.0,0.0,0.0,0.0,0.0,0.0,2.0,0.0,0.0,0.0,0.0
ARGJ_LACBS Arginine biosynthesis bifunctional protein ArgJ, mitochondrial OS=Laccaria bicolor (strain S238N-H82 / ATCC MYA-4686) GN=LACBIDRAFT_324786 PE=3 SV=1	K00620	2.3.1.1,2.3.1.35	0.0,0.0,0.0,1.0,0.0,0.0,0.0,0.0,0.0,0.0,0.0,0.0,0.0,0.0,0.0,0.0,0.0,0.0,0.0,0.0,0.0,0.0,0.0,0.0,0.0,0.0,0.0,0.0,0.0,0.0,0.0,0.0,0.0,0.0,0.0,0.0,0.0,0.0,0.0,0.0,0.0,0.0,0.0,0.0
MG: Septum site-determining protein MinD OS=Synechocystis sp. (strain PCC 6803 / Kazusa) GN=minD PE=3 SV=1 [Q55900] Score: 175.0	K03609	UNKNOWN	0.0,0.0,0.0,0.0,0.0,0.0,0.0,0.0,0.0,0.0,0.0,0.0,0.0,0.0,4.0,0.0,3.0,0.0,0.0,0.0,0.0,0.0,0.0,0.0,0.0,0.0,0.0,0.0,0.0,0.0,0.0,0.0,0.0,0.0,0.0,0.0,0.0,0.0,0.0,0.0,0.0,0.0,0.0,0.0
Y1110_METJA Uncharacterized protein MJ1110 OS=Methanocaldococcus jannaschii (strain ATCC 43067 / DSM 2661 / JAL-1 / JCM 10045 / NBRC 100440) GN=MJ1110 PE=4 SV=1	K09724	UNKNOWN	0.0,0.0,0.0,0.0,0.0,0.0,0.0,0.0,0.0,0.0,0.0,0.0,1.0,0.0,0.0,0.0,0.0,0.0,0.0,0.0,0.0,0.0,0.0,0.0,0.0,0.0,0.0,0.0,0.0,0.0,0.0,0.0,0.0,0.0,0.0,0.0,0.0,0.0,0.0,0.0,0.0,0.0,0.0,0.0
MG: CDP-diacylglycerol--glycerol-3-phosphate 3-phosphatidyltransferase OS=Rickettsia felis (strain ATCC VR-1525 / URRWXCal2) GN=pgsA PE=3 SV=1 [Q4UN77] Score: 84.3	K00995	2.7.8.5	0.0,0.0,0.0,0.0,0.0,0.0,0.0,0.0,0.0,0.0,0.0,0.0,5.0,2.0,1.0,1.0,2.0,0.0,0.0,0.0,0.0,0.0,0.0,0.0,0.0,0.0,0.0,0.0,0.0,0.0,0.0,0.0,0.0,0.0,0.0,0.0,0.0,0.0,0.0,0.0,0.0,0.0,0.0,0.0
MG: Sulfurtransferase TusA OS=Photorhabdus luminescens subsp. laumondii (strain TT01) GN=tusA PE=3 SV=1 [Q7MZZ5] Score: 45.1	K04085	2.8.1.-	0.0,0.0,0.0,0.0,8.0,2.0,4.0,3.0,0.0,0.0,0.0,0.0,0.0,0.0,0.0,0.0,1.0,5.0,0.0,0.0,0.0,0.0,0.0,0.0,0.0,3.0,5.0,3.0,9.0,6.0,6.0,5.0,3.0,4.0,10.0,8.0,0.0,0.0,0.0,0.0,0.0,0.0,1.0,0.0
MG: V-type ATP synthase subunit E OS=Methanothermobacter thermautotrophicus (strain ATCC 29096 / DSM 1053 / JCM 10044 / NBRC 100330 / Delta H) GN=atpE PE=3 SV=1 [O27039] Score: 219.0	UNKNOWN	UNKNOWN	0.0,0.0,0.0,0.0,0.0,0.0,0.0,0.0,0.0,0.0,0.0,0.0,0.0,0.0,0.0,0.0,0.0,0.0,0.0,0.0,0.0,0.0,0.0,0.0,0.0,0.0,0.0,0.0,0.0,0.0,0.0,0.0,0.0,0.0,0.0,0.0,0.0,0.0,0.0,0.0,0.0,0.0,0.0,1.0
MG: Uncharacterized protein MJ1337 OS=Methanocaldococcus jannaschii (strain ATCC 43067 / DSM 2661 / JAL-1 / JCM 10045 / NBRC 100440) GN=MJ1337 PE=4 SV=1 [Q58733] Score: 186.0	UNKNOWN	UNKNOWN	0.0,0.0,0.0,0.0,0.0,0.0,0.0,0.0,0.0,0.0,0.0,0.0,0.0,0.0,0.0,0.0,0.0,0.0,0.0,0.0,0.0,0.0,0.0,0.0,0.0,0.0,0.0,0.0,0.0,0.0,0.0,0.0,0.0,0.0,0.0,0.0,0.0,0.0,2.0,0.0,0.0,0.0,0.0,0.0
MG: RNA polymerase sigma-E factor OS=Streptomyces antibioticus GN=sigE PE=3 SV=1 [O68887] Score: 55.5	UNKNOWN	UNKNOWN	0.0,0.0,0.0,0.0,0.0,0.0,0.0,0.0,0.0,0.0,0.0,0.0,0.0,0.0,1.0,0.0,1.0,1.0,1.0,0.0,0.0,0.0,0.0,0.0,0.0,0.0,0.0,0.0,0.0,0.0,0.0,0.0,0.0,0.0,0.0,0.0,0.0,0.0,0.0,0.0,0.0,0.0,0.0,0.0
MG: RNA 2',3'-cyclic phosphodiesterase OS=Aquifex aeolicus (strain VF5) GN=aq_768 PE=3 SV=1 [O66967] Score: 96.3	K01975	3.1.4.-	0.0,0.0,0.0,0.0,0.0,0.0,0.0,0.0,1.0,0.0,2.0,2.0,0.0,0.0,0.0,0.0,0.0,1.0,0.0,0.0,0.0,0.0,0.0,0.0,0.0,0.0,0.0,0.0,0.0,0.0,0.0,0.0,0.0,0.0,0.0,0.0,0.0,0.0,0.0,0.0,0.0,0.0,0.0,0.0
MG: Sensory transduction protein LytT OS=Bacillus anthracis GN=lytT PE=3 SV=1 [Q81JL3] Score: 183.0	K07705	UNKNOWN	0.0,0.0,0.0,0.0,0.0,0.0,1.0,0.0,0.0,0.0,0.0,0.0,0.0,0.0,0.0,0.0,0.0,0.0,0.0,0.0,0.0,0.0,0.0,0.0,0.0,0.0,0.0,0.0,0.0,0.0,0.0,0.0,0.0,0.0,0.0,0.0,0.0,0.0,0.0,0.0,0.0,0.0,0.0,0.0
NDK_PECCP Nucleoside diphosphate kinase OS=Pectobacterium carotovorum subsp. carotovorum (strain PC1) GN=ndk PE=3 SV=1	K00940	2.7.4.6	0.0,0.0,0.0,0.0,0.0,0.0,0.0,0.0,0.0,0.0,0.0,0.0,0.0,1.0,0.0,0.0,0.0,0.0,0.0,0.0,0.0,0.0,0.0,0.0,0.0,0.0,0.0,0.0,0.0,0.0,0.0,0.0,0.0,0.0,0.0,0.0,0.0,0.0,0.0,0.0,0.0,0.0,0.0,0.0
RL20_VIBAN 50S ribosomal protein L20 OS=Vibrio anguillarum GN=rplT PE=3 SV=1	UNKNOWN	UNKNOWN	0.0,0.0,0.0,0.0,0.0,0.0,0.0,0.0,0.0,0.0,0.0,0.0,0.0,0.0,0.0,0.0,0.0,0.0,0.0,0.0,0.0,0.0,0.0,0.0,0.0,0.0,0.0,0.0,0.0,0.0,0.0,0.0,0.0,0.0,0.0,0.0,0.0,0.0,0.0,0.0,0.0,0.0,6.0,0.0
PSBC_CHLVU Photosystem II CP43 chlorophyll apoprotein OS=Chlorella vulgaris GN=psbC PE=3 SV=1	UNKNOWN	UNKNOWN	219.0,180.0,243.0,187.0,268.0,364.0,216.0,224.0,191.0,173.0,178.0,201.0,27.0,30.0,32.0,18.0,27.0,29.0,15.0,23.0,217.0,204.0,252.0,236.0,104.0,62.0,52.0,51.0,131.0,139.0,120.0,148.0,174.0,132.0,206.0,127.0,143.0,238.0,262.0,222.0,9.0,67.0,30.0,89.0
MG: Methionine--tRNA ligase OS=Thermus thermophilus (strain HB8 / ATCC 27634 / DSM 579) GN=metG PE=1 SV=2 [P23395] Score: 138.0	K01874	6.1.1.10	0.0,0.0,0.0,0.0,0.0,0.0,0.0,0.0,0.0,0.0,0.0,1.0,0.0,0.0,0.0,0.0,0.0,0.0,0.0,0.0,0.0,0.0,0.0,0.0,0.0,0.0,0.0,0.0,0.0,0.0,0.0,0.0,0.0,0.0,0.0,0.0,0.0,0.0,2.0,2.0,0.0,0.0,0.0,0.0
DJB13_HUMAN DnaJ homolog subfamily B member 13 OS=Homo sapiens GN=DNAJB13 PE=2 SV=1	K09519	UNKNOWN	0.0,0.0,0.0,0.0,0.0,0.0,0.0,0.0,0.0,0.0,0.0,0.0,0.0,0.0,0.0,0.0,0.0,0.0,0.0,0.0,1.0,0.0,0.0,0.0,0.0,0.0,0.0,0.0,0.0,0.0,0.0,0.0,0.0,0.0,0.0,0.0,0.0,0.0,0.0,0.0,0.0,0.0,0.0,0.0
GLK_ENT38 Glucokinase OS=Enterobacter sp. (strain 638) GN=glk PE=3 SV=1	K00845	2.7.1.2	0.0,0.0,0.0,0.0,0.0,0.0,0.0,0.0,0.0,0.0,0.0,0.0,0.0,0.0,0.0,0.0,0.0,0.0,0.0,0.0,0.0,0.0,0.0,0.0,0.0,0.0,0.0,0.0,0.0,0.0,0.0,0.0,0.0,0.0,0.0,0.0,0.0,0.0,0.0,0.0,0.0,0.0,3.0,0.0
PGM_ENTDI Phosphoglucomutase OS=Entamoeba dispar GN=pgm PE=2 SV=1	UNKNOWN	5.4.2.2	0.0,0.0,0.0,0.0,0.0,0.0,0.0,0.0,0.0,0.0,0.0,0.0,0.0,0.0,0.0,0.0,0.0,0.0,0.0,0.0,0.0,0.0,0.0,0.0,0.0,0.0,0.0,0.0,0.0,0.0,0.0,0.0,0.0,0.0,0.0,0.0,0.0,0.0,0.0,0.0,0.0,0.0,0.0,2.0
MG: UPF0001 protein in pilT-proC intergenic region OS=Vibrio alginolyticus PE=3 SV=1 [P52055] Score: 154.0	UNKNOWN	UNKNOWN	0.0,0.0,0.0,0.0,0.0,0.0,0.0,0.0,0.0,0.0,0.0,0.0,0.0,0.0,0.0,0.0,0.0,0.0,0.0,0.0,4.0,1.0,1.0,0.0,0.0,0.0,0.0,0.0,0.0,0.0,0.0,0.0,0.0,0.0,0.0,0.0,0.0,0.0,0.0,0.0,0.0,0.0,0.0,0.0
COFC_SANKS 2-phospho-L-lactate guanylyltransferase OS=Sanguibacter keddieii (strain ATCC 51767 / DSM 10542 / NCFB 3025 / ST-74) GN=cofC PE=3 SV=1	K14941	2.7.7.68	0.0,0.0,0.0,0.0,0.0,0.0,1.0,0.0,0.0,0.0,0.0,0.0,0.0,0.0,0.0,0.0,0.0,0.0,0.0,0.0,0.0,0.0,0.0,0.0,0.0,0.0,0.0,0.0,0.0,0.0,0.0,0.0,0.0,0.0,0.0,0.0,0.0,0.0,0.0,0.0,0.0,0.0,0.0,0.0
KYNB_DEIGD Kynurenine formamidase OS=Deinococcus geothermalis (strain DSM 11300) GN=kynB PE=3 SV=1	K07130	3.5.1.9	0.0,0.0,0.0,0.0,0.0,0.0,0.0,0.0,0.0,0.0,0.0,0.0,0.0,0.0,0.0,0.0,0.0,0.0,0.0,0.0,0.0,1.0,0.0,0.0,2.0,2.0,2.0,1.0,0.0,0.0,0.0,0.0,0.0,0.0,0.0,0.0,0.0,1.0,0.0,0.0,0.0,0.0,1.0,1.0
MG: Phosphoglycolate phosphatase OS=Enterobacter aerogenes GN=gph PE=3 SV=1 [Q9EYY5] Score: 75.5	UNKNOWN	3.1.3.18	0.0,0.0,0.0,0.0,0.0,0.0,1.0,0.0,0.0,0.0,0.0,0.0,0.0,0.0,0.0,0.0,0.0,0.0,0.0,0.0,0.0,0.0,0.0,0.0,0.0,0.0,0.0,0.0,0.0,0.0,0.0,0.0,0.0,1.0,1.0,0.0,0.0,0.0,0.0,0.0,0.0,0.0,0.0,0.0
QUEA_CHLT3 S-adenosylmethionine:tRNA ribosyltransferase-isomerase OS=Chloroherpeton thalassium (strain ATCC 35110 / GB-78) GN=queA PE=3 SV=1	K07568	2.4.99.17	0.0,0.0,0.0,0.0,0.0,0.0,0.0,0.0,0.0,0.0,0.0,1.0,0.0,0.0,0.0,0.0,0.0,0.0,0.0,0.0,0.0,0.0,0.0,0.0,0.0,0.0,0.0,0.0,0.0,0.0,0.0,0.0,0.0,0.0,0.0,0.0,0.0,0.0,0.0,0.0,0.0,0.0,0.0,0.0
NDK_EMENI Nucleoside diphosphate kinase OS=Emericella nidulans (strain FGSC A4 / ATCC 38163 / CBS 112.46 / NRRL 194 / M139) GN=swoH PE=3 SV=1	K00940	2.7.4.6	0.0,0.0,0.0,0.0,2.0,1.0,0.0,1.0,0.0,0.0,0.0,0.0,0.0,0.0,0.0,0.0,0.0,0.0,0.0,0.0,0.0,0.0,0.0,0.0,0.0,0.0,0.0,0.0,0.0,0.0,0.0,0.0,0.0,0.0,0.0,0.0,0.0,0.0,0.0,0.0,0.0,0.0,0.0,0.0
ACTC_HALRO Actin, nonmuscle OS=Halocynthia roretzi GN=CA1 PE=3 SV=1	UNKNOWN	UNKNOWN	2.0,0.0,7.0,7.0,0.0,31.0,0.0,0.0,0.0,3.0,129.0,1.0,0.0,0.0,0.0,0.0,0.0,0.0,0.0,0.0,0.0,0.0,73.0,15.0,0.0,0.0,0.0,1.0,0.0,0.0,7.0,4.0,0.0,0.0,0.0,0.0,2.0,0.0,0.0,0.0,1.0,0.0,0.0,0.0
MG: Ubiquinone biosynthesis O-methyltransferase OS=Rhodopseudomonas palustris (strain HaA2) GN=ubiG PE=3 SV=1 [Q2J419] Score: 56.2	K00568	2.1.1.222,2.1.1.64	0.0,0.0,0.0,0.0,1.0,1.0,0.0,0.0,1.0,2.0,2.0,1.0,0.0,0.0,0.0,0.0,0.0,0.0,0.0,0.0,0.0,0.0,0.0,0.0,0.0,0.0,0.0,0.0,0.0,0.0,0.0,0.0,0.0,0.0,0.0,0.0,0.0,0.0,0.0,0.0,0.0,0.0,0.0,0.0
MG: tRNA dimethylallyltransferase OS=Halothermothrix orenii (strain H 168 / OCM 544 / DSM 9562) GN=miaA PE=3 SV=1 [B8CX96] Score: 323.0	K00791	2.5.1.75	0.0,0.0,0.0,0.0,0.0,1.0,0.0,0.0,0.0,0.0,0.0,0.0,0.0,0.0,0.0,0.0,0.0,0.0,0.0,0.0,0.0,0.0,0.0,0.0,0.0,0.0,0.0,0.0,0.0,0.0,0.0,0.0,0.0,0.0,0.0,0.0,0.0,0.0,0.0,0.0,0.0,0.0,0.0,0.0
MG: Transposon Tn2501 resolvase OS=Escherichia coli GN=tnpR PE=3 SV=1 [P05823] Score: 96.7	UNKNOWN	UNKNOWN	0.0,0.0,0.0,0.0,0.0,0.0,0.0,0.0,0.0,0.0,0.0,0.0,0.0,0.0,1.0,0.0,0.0,0.0,0.0,0.0,0.0,0.0,0.0,0.0,0.0,0.0,0.0,0.0,0.0,0.0,0.0,0.0,0.0,0.0,0.0,0.0,0.0,0.0,0.0,0.0,0.0,0.0,0.0,0.0
EBR_ECOLX Putative ethidium bromide resistance protein OS=Escherichia coli GN=ebr PE=3 SV=1	K18975	UNKNOWN	0.0,0.0,0.0,0.0,0.0,0.0,0.0,0.0,0.0,0.0,0.0,0.0,0.0,0.0,0.0,0.0,0.0,0.0,0.0,1.0,0.0,0.0,0.0,0.0,0.0,0.0,0.0,0.0,0.0,0.0,0.0,0.0,0.0,0.0,0.0,0.0,0.0,0.0,0.0,0.0,0.0,0.0,0.0,0.0
RL5_WIGBR 50S ribosomal protein L5 OS=Wigglesworthia glossinidia brevipalpis GN=rplE PE=3 SV=1	UNKNOWN	UNKNOWN	0.0,0.0,2.0,0.0,0.0,0.0,0.0,1.0,0.0,0.0,0.0,0.0,0.0,4.0,3.0,3.0,1.0,1.0,0.0,0.0,0.0,0.0,0.0,0.0,0.0,0.0,0.0,0.0,0.0,0.0,0.0,0.0,0.0,0.0,0.0,0.0,1.0,0.0,0.0,1.0,0.0,0.0,0.0,0.0
MG: Nucleoside diphosphate kinase OS=Parabacteroides distasonis (strain ATCC 8503 / DSM 20701 / NCTC 11152) GN=ndk PE=3 SV=1 [A6LCB6] Score: 239.0	K00940	2.7.4.6	0.0,0.0,0.0,0.0,5.0,2.0,1.0,6.0,1.0,0.0,1.0,0.0,0.0,0.0,0.0,0.0,0.0,0.0,0.0,0.0,0.0,0.0,0.0,0.0,0.0,0.0,0.0,0.0,0.0,0.0,0.0,0.0,0.0,0.0,0.0,0.0,0.0,0.0,0.0,0.0,0.0,0.0,0.0,0.0
MG: 6,7-dimethyl-8-ribityllumazine synthase OS=Parabacteroides distasonis (strain ATCC 8503 / DSM 20701 / NCTC 11152) GN=ribH PE=3 SV=1 [A6L8H3] Score: 218.0	K00794	2.5.1.78	1.0,1.0,1.0,0.0,0.0,0.0,0.0,0.0,0.0,0.0,0.0,0.0,0.0,0.0,0.0,0.0,0.0,0.0,0.0,0.0,0.0,0.0,0.0,0.0,0.0,0.0,0.0,0.0,0.0,0.0,0.0,0.0,0.0,0.0,0.0,0.0,0.0,0.0,0.0,0.0,0.0,2.0,0.0,0.0
GCSPA_RHORT Probable glycine dehydrogenase (decarboxylating) subunit 1 OS=Rhodospirillum rubrum (strain ATCC 11170 / ATH 1.1.1 / DSM 467 / LMG 4362 / NCIB 8255 / S1) GN=gcvPA PE=3 SV=1	K00282	1.4.4.2	0.0,0.0,0.0,0.0,2.0,0.0,0.0,1.0,1.0,0.0,0.0,0.0,0.0,0.0,4.0,2.0,1.0,3.0,2.0,1.0,0.0,0.0,0.0,0.0,1.0,0.0,2.0,0.0,2.0,2.0,2.0,0.0,0.0,0.0,3.0,1.0,0.0,0.0,1.0,0.0,0.0,0.0,0.0,0.0
MG: Methylated-DNA--protein-cysteine methyltransferase, inducible OS=Bacillus subtilis (strain 168) GN=adaB PE=1 SV=1 [P19220] Score: 135.0	K13531	2.1.1.63	0.0,0.0,0.0,0.0,0.0,0.0,0.0,0.0,1.0,0.0,0.0,0.0,0.0,0.0,0.0,0.0,0.0,0.0,0.0,0.0,0.0,0.0,0.0,0.0,0.0,0.0,0.0,0.0,0.0,0.0,0.0,0.0,0.0,0.0,0.0,0.0,0.0,0.0,0.0,0.0,0.0,0.0,0.0,0.0
MG: Succinyl-diaminopimelate desuccinylase OS=Photorhabdus luminescens subsp. laumondii (strain TT01) GN=dapE PE=3 SV=1 [Q7N3J4] Score: 119.0	K01439	3.5.1.18	0.0,0.0,0.0,0.0,0.0,0.0,0.0,0.0,1.0,0.0,0.0,0.0,0.0,1.0,0.0,0.0,0.0,0.0,0.0,0.0,0.0,0.0,0.0,0.0,0.0,0.0,0.0,0.0,0.0,0.0,0.0,0.0,0.0,0.0,0.0,0.0,1.0,0.0,0.0,0.0,0.0,0.0,0.0,0.0
MG: Probable inactive nicotinamidase At3g16190 OS=Arabidopsis thaliana GN=At3g16190 PE=2 SV=1 [Q93Z51] Score: 80.5	UNKNOWN	UNKNOWN	0.0,0.0,0.0,0.0,0.0,0.0,0.0,0.0,0.0,0.0,0.0,0.0,0.0,0.0,0.0,0.0,0.0,0.0,0.0,0.0,0.0,0.0,0.0,0.0,3.0,6.0,2.0,3.0,0.0,0.0,0.0,0.0,0.0,0.0,0.0,0.0,0.0,0.0,0.0,0.0,0.0,0.0,0.0,0.0
MG: 3-isopropylmalate dehydratase small subunit OS=Methanothermobacter thermautotrophicus (strain ATCC 29096 / DSM 1053 / JCM 10044 / NBRC 100330 / Delta H) GN=leuD PE=3 SV=1 [O27440] Score: 142.0	UNKNOWN	4.2.1.33	3.0,5.0,0.0,0.0,40.0,32.0,22.0,30.0,39.0,38.0,7.0,6.0,0.0,0.0,0.0,1.0,3.0,0.0,0.0,0.0,1.0,1.0,0.0,1.0,8.0,1.0,0.0,0.0,0.0,0.0,0.0,0.0,0.0,0.0,3.0,0.0,0.0,0.0,0.0,4.0,0.0,0.0,0.0,0.0
METK_MICAN S-adenosylmethionine synthase OS=Microcystis aeruginosa (strain NIES-843) GN=metK PE=3 SV=1	K00789	2.5.1.6	0.0,0.0,0.0,0.0,0.0,0.0,0.0,0.0,0.0,0.0,1.0,0.0,5.0,2.0,0.0,0.0,0.0,0.0,0.0,0.0,0.0,0.0,0.0,0.0,0.0,0.0,0.0,0.0,0.0,0.0,0.0,0.0,0.0,0.0,1.0,0.0,0.0,0.0,0.0,0.0,0.0,0.0,0.0,0.0
MG: Catabolite control protein A OS=Streptococcus mutans serotype c (strain ATCC 700610 / UA159) GN=ccpA PE=3 SV=2 [O07329] Score: 353.0	K02529	UNKNOWN	0.0,0.0,5.0,0.0,3.0,3.0,7.0,6.0,0.0,1.0,0.0,0.0,0.0,0.0,0.0,0.0,0.0,0.0,0.0,0.0,3.0,3.0,4.0,1.0,0.0,0.0,0.0,0.0,4.0,5.0,2.0,2.0,1.0,0.0,13.0,8.0,0.0,0.0,4.0,4.0,1.0,5.0,4.0,2.0
UBIQ_AVESA Ubiquitin OS=Avena sativa PE=1 SV=1	UNKNOWN	UNKNOWN	0.0,0.0,0.0,0.0,0.0,0.0,1.0,0.0,2.0,0.0,2.0,2.0,0.0,0.0,1.0,0.0,2.0,1.0,0.0,0.0,0.0,2.0,4.0,2.0,0.0,0.0,0.0,0.0,1.0,0.0,0.0,0.0,0.0,0.0,1.0,0.0,2.0,1.0,1.0,1.0,0.0,0.0,0.0,0.0
NDK2_PEA Nucleoside diphosphate kinase 2, chloroplastic OS=Pisum sativum GN=NDPK2 PE=1 SV=1	UNKNOWN	2.7.4.6	0.0,0.0,0.0,0.0,0.0,0.0,0.0,1.0,3.0,0.0,1.0,0.0,3.0,1.0,2.0,11.0,5.0,2.0,0.0,5.0,0.0,0.0,0.0,0.0,0.0,0.0,0.0,0.0,0.0,0.0,0.0,0.0,0.0,0.0,0.0,0.0,0.0,0.0,2.0,2.0,0.0,0.0,0.0,0.0
MG: Acetyl-coenzyme A carboxylase carboxyl transferase subunit alpha OS=Bacillus clausii (strain KSM-K16) GN=accA PE=3 SV=1 [Q5WEF5] Score: 51.2	K01962	6.4.1.2	0.0,0.0,0.0,0.0,0.0,0.0,0.0,0.0,0.0,0.0,0.0,0.0,0.0,0.0,0.0,0.0,0.0,0.0,0.0,0.0,0.0,0.0,0.0,0.0,0.0,0.0,0.0,0.0,0.0,0.0,0.0,0.0,0.0,0.0,0.0,0.0,0.0,0.0,1.0,0.0,0.0,0.0,3.0,0.0
MURG_ORITB UDP-N-acetylglucosamine--N-acetylmuramyl-(pentapeptide) pyrophosphoryl-undecaprenol N-acetylglucosamine transferase OS=Orientia tsutsugamushi (strain Boryong) GN=murG PE=3 SV=1	K02563	2.4.1.227	0.0,0.0,0.0,1.0,0.0,0.0,0.0,0.0,0.0,0.0,0.0,0.0,0.0,0.0,0.0,0.0,0.0,0.0,0.0,0.0,0.0,0.0,0.0,0.0,0.0,0.0,0.0,0.0,0.0,0.0,0.0,0.0,0.0,0.0,0.0,0.0,0.0,0.0,0.0,0.0,0.0,0.0,0.0,0.0
YREP_STRAM Uncharacterized 19.3 kDa protein in repSA 5'region OS=Streptomyces ambofaciens PE=3 SV=1	UNKNOWN	UNKNOWN	0.0,0.0,0.0,0.0,0.0,0.0,0.0,0.0,0.0,0.0,0.0,0.0,0.0,0.0,0.0,0.0,0.0,0.0,0.0,0.0,0.0,0.0,0.0,0.0,0.0,0.0,0.0,0.0,0.0,0.0,0.0,0.0,0.0,1.0,0.0,0.0,0.0,0.0,0.0,0.0,0.0,0.0,0.0,0.0
ATKB2_LISIN Potassium-transporting ATPase B chain 2 OS=Listeria innocua serovar 6a (strain CLIP 11262) GN=kdpB2 PE=3 SV=1	K01547	3.6.3.12	0.0,0.0,0.0,0.0,0.0,0.0,0.0,0.0,1.0,1.0,0.0,0.0,1.0,0.0,0.0,0.0,0.0,1.0,0.0,0.0,0.0,1.0,0.0,0.0,0.0,0.0,0.0,0.0,0.0,0.0,0.0,0.0,0.0,0.0,0.0,0.0,0.0,0.0,0.0,0.0,0.0,0.0,0.0,0.0
MG: Benzoate transport protein OS=Acinetobacter baylyi (strain ATCC 33305 / BD413 / ADP1) GN=benK PE=3 SV=2 [O30513] Score: 307.0	K05548	UNKNOWN	0.0,0.0,0.0,0.0,0.0,0.0,0.0,0.0,0.0,0.0,0.0,0.0,0.0,0.0,1.0,1.0,0.0,0.0,1.0,0.0,0.0,0.0,0.0,0.0,0.0,0.0,0.0,0.0,0.0,0.0,0.0,0.0,0.0,0.0,0.0,0.0,0.0,0.0,0.0,0.0,0.0,0.0,0.0,0.0
MG: Putative monooxygenase YxeK OS=Bacillus subtilis (strain 168) GN=yxeK PE=3 SV=1 [P54950] Score: 269.0	UNKNOWN	UNKNOWN	0.0,0.0,0.0,0.0,0.0,0.0,0.0,0.0,0.0,0.0,0.0,0.0,0.0,0.0,0.0,1.0,0.0,0.0,0.0,0.0,0.0,0.0,0.0,0.0,0.0,0.0,0.0,0.0,0.0,0.0,0.0,0.0,0.0,0.0,0.0,0.0,0.0,0.0,0.0,0.0,0.0,0.0,0.0,0.0
MG: Levodione reductase OS=Leifsonia aquatica GN=lvr PE=1 SV=1 [Q9LBG2] Score: 319.0	UNKNOWN	1.1.1.-	0.0,0.0,0.0,0.0,0.0,0.0,0.0,0.0,0.0,0.0,0.0,0.0,0.0,0.0,2.0,0.0,0.0,3.0,0.0,0.0,1.0,0.0,0.0,0.0,6.0,6.0,1.0,3.0,0.0,0.0,0.0,0.0,0.0,0.0,0.0,0.0,0.0,0.0,0.0,0.0,0.0,0.0,0.0,1.0
MG: TPR repeat-containing protein MJ0798 OS=Methanocaldococcus jannaschii (strain ATCC 43067 / DSM 2661 / JAL-1 / JCM 10045 / NBRC 100440) GN=MJ0798 PE=3 SV=1 [Q58208] Score: 76.6	UNKNOWN	UNKNOWN	0.0,0.0,0.0,0.0,0.0,0.0,1.0,0.0,0.0,2.0,0.0,1.0,0.0,4.0,3.0,0.0,3.0,1.0,1.0,0.0,0.0,0.0,0.0,0.0,0.0,0.0,0.0,0.0,0.0,0.0,0.0,0.0,0.0,0.0,0.0,0.0,0.0,0.0,1.0,0.0,0.0,0.0,0.0,0.0
RAB33_CIOIN Putative Ras-related protein Rab-33 OS=Ciona intestinalis GN=COS41.2 PE=3 SV=1	UNKNOWN	UNKNOWN	0.0,0.0,0.0,0.0,0.0,0.0,0.0,0.0,0.0,0.0,0.0,0.0,0.0,0.0,0.0,0.0,0.0,0.0,0.0,0.0,0.0,0.0,0.0,0.0,0.0,0.0,0.0,0.0,0.0,0.0,0.0,0.0,0.0,0.0,0.0,0.0,0.0,0.0,0.0,1.0,0.0,0.0,0.0,0.0
MG: 50S ribosomal protein L6 OS=Thermotoga maritima (strain ATCC 43589 / MSB8 / DSM 3109 / JCM 10099) GN=rplF PE=3 SV=2 [Q9ZAE4] Score: 206.0	K02933	UNKNOWN	0.0,0.0,0.0,0.0,0.0,0.0,0.0,0.0,0.0,0.0,0.0,0.0,16.0,17.0,13.0,15.0,6.0,4.0,2.0,15.0,0.0,0.0,0.0,0.0,0.0,0.0,0.0,0.0,0.0,0.0,0.0,0.0,0.0,0.0,0.0,0.0,0.0,0.0,0.0,0.0,0.0,0.0,0.0,0.0
MG: Ketol-acid reductoisomerase OS=Methanoculleus marisnigri (strain ATCC 35101 / DSM 1498 / JR1) GN=ilvC PE=3 SV=1 [A3CXJ5] Score: 266.0	K00053	1.1.1.86	50.0,34.0,38.0,12.0,53.0,31.0,84.0,53.0,42.0,46.0,32.0,25.0,487.0,493.0,642.0,631.0,532.0,670.0,808.0,313.0,21.0,19.0,14.0,32.0,21.0,15.0,19.0,19.0,34.0,21.0,31.0,28.0,17.0,15.0,9.0,14.0,49.0,37.0,42.0,49.0,1.0,19.0,10.0,59.0
MG: 30S ribosomal protein S15 OS=Geobacillus kaustophilus (strain HTA426) GN=rpsO PE=3 SV=1 [Q5L0I3] Score: 128.0	K02956	UNKNOWN	0.0,0.0,0.0,0.0,0.0,0.0,0.0,0.0,0.0,0.0,0.0,0.0,0.0,0.0,0.0,0.0,0.0,0.0,0.0,0.0,0.0,0.0,0.0,0.0,0.0,0.0,0.0,0.0,0.0,0.0,0.0,0.0,0.0,0.0,3.0,0.0,0.0,0.0,0.0,0.0,0.0,0.0,0.0,0.0
MG: Virion DNA-directed RNA polymerase OS=Enterobacteria phage N4 PE=1 SV=2 [Q859P9] Score: 57.0	UNKNOWN	2.7.7.6	0.0,0.0,0.0,0.0,0.0,0.0,0.0,0.0,0.0,0.0,0.0,0.0,0.0,0.0,0.0,0.0,1.0,0.0,0.0,0.0,0.0,0.0,0.0,0.0,0.0,0.0,0.0,0.0,0.0,0.0,0.0,0.0,0.0,0.0,0.0,0.0,0.0,0.0,0.0,0.0,0.0,0.0,0.0,0.0
MG: Subtilisin-like protease SBT2.4 OS=Arabidopsis thaliana GN=SBT2.4 PE=1 SV=1 [F4HYR6] Score: 48.1	UNKNOWN	3.4.21.-	0.0,0.0,0.0,0.0,0.0,0.0,0.0,0.0,0.0,0.0,0.0,0.0,0.0,0.0,0.0,0.0,0.0,0.0,0.0,0.0,0.0,0.0,0.0,0.0,0.0,0.0,0.0,0.0,0.0,0.0,0.0,0.0,0.0,0.0,0.0,0.0,0.0,0.0,0.0,1.0,0.0,0.0,0.0,0.0
MG: Protease Do-like 1, chloroplastic OS=Arabidopsis thaliana GN=DEGP1 PE=1 SV=2 [O22609] Score: 239.0	UNKNOWN	3.4.21.-	0.0,0.0,0.0,0.0,0.0,0.0,0.0,0.0,0.0,0.0,0.0,0.0,0.0,0.0,0.0,0.0,0.0,0.0,0.0,0.0,1.0,2.0,0.0,0.0,0.0,0.0,0.0,0.0,0.0,0.0,0.0,0.0,0.0,0.0,0.0,0.0,0.0,0.0,0.0,0.0,0.0,0.0,0.0,0.0
MG: DNA repair protein RecN OS=Bacillus halodurans (strain ATCC BAA-125 / DSM 18197 / FERM 7344 / JCM 9153 / C-125) GN=recN PE=3 SV=1 [Q9K974] Score: 386.0	K03631	UNKNOWN	0.0,0.0,0.0,0.0,1.0,3.0,0.0,0.0,0.0,0.0,1.0,3.0,7.0,3.0,6.0,5.0,7.0,8.0,3.0,14.0,2.0,2.0,1.0,0.0,1.0,0.0,0.0,0.0,0.0,0.0,0.0,1.0,0.0,1.0,1.0,4.0,2.0,1.0,0.0,1.0,0.0,2.0,0.0,0.0
RS19_COXBN 30S ribosomal protein S19 OS=Coxiella burnetii (strain Dugway 5J108-111) GN=rpsS PE=3 SV=1	K02965	UNKNOWN	0.0,0.0,0.0,0.0,0.0,0.0,0.0,0.0,0.0,0.0,0.0,0.0,0.0,0.0,0.0,0.0,0.0,0.0,0.0,0.0,0.0,0.0,0.0,0.0,0.0,0.0,0.0,0.0,0.0,0.0,0.0,0.0,0.0,0.0,3.0,4.0,0.0,0.0,0.0,0.0,0.0,0.0,0.0,0.0
MG: ATP-dependent Clp protease proteolytic subunit OS=Chlamydomonas moewusii GN=clpP PE=3 SV=1 [P42379] Score: 77.4	UNKNOWN	3.4.21.92	0.0,0.0,0.0,0.0,0.0,0.0,0.0,0.0,0.0,0.0,0.0,0.0,0.0,0.0,0.0,0.0,0.0,0.0,0.0,0.0,0.0,0.0,0.0,0.0,0.0,0.0,0.0,1.0,0.0,0.0,0.0,0.0,0.0,0.0,0.0,0.0,0.0,0.0,1.0,1.0,0.0,0.0,0.0,0.0
MG: 5-methyltetrahydropteroyltriglutamate--homocysteine methyltransferase OS=Buchnera aphidicola subsp. Cinara cedri (strain Cc) GN=metE PE=3 SV=1 [Q058E7] Score: 619.0	K00549	2.1.1.14	0.0,0.0,0.0,0.0,0.0,0.0,0.0,0.0,0.0,12.0,1.0,6.0,6.0,2.0,12.0,12.0,0.0,0.0,0.0,2.0,0.0,0.0,0.0,0.0,4.0,5.0,1.0,0.0,0.0,9.0,5.0,11.0,0.0,0.0,0.0,0.0,0.0,0.0,2.0,2.0,0.0,0.0,1.0,0.0
GLPK_CLOBA Glycerol kinase OS=Clostridium botulinum (strain Alaska E43 / Type E3) GN=glpK PE=3 SV=1	K00864	2.7.1.30	36.0,27.0,3.0,1.0,32.0,36.0,48.0,37.0,10.0,11.0,7.0,6.0,11.0,15.0,9.0,2.0,7.0,18.0,6.0,1.0,6.0,13.0,11.0,16.0,7.0,5.0,8.0,5.0,8.0,6.0,9.0,12.0,12.0,7.0,9.0,10.0,4.0,12.0,11.0,12.0,5.0,58.0,4.0,5.0
MG: Trehalose/maltose transport system permease protein MalF OS=Thermococcus litoralis (strain ATCC 51850 / DSM 5473 / JCM 8560 / NS-C) GN=malF PE=1 SV=2 [O51924] Score: 147.0	K02025	UNKNOWN	0.0,0.0,0.0,0.0,0.0,0.0,0.0,0.0,0.0,0.0,0.0,0.0,52.0,66.0,56.0,33.0,75.0,69.0,30.0,45.0,0.0,0.0,0.0,0.0,0.0,0.0,0.0,0.0,0.0,0.0,0.0,0.0,0.0,0.0,0.0,0.0,0.0,0.0,0.0,0.0,0.0,0.0,0.0,0.0
MG: Capsule biosynthesis protein CapD OS=Bacillus anthracis GN=capD PE=1 SV=2 [Q51693] Score: 224.0	K00681	2.3.2.-	0.0,0.0,0.0,0.0,0.0,0.0,0.0,0.0,0.0,0.0,0.0,0.0,0.0,0.0,0.0,0.0,0.0,0.0,0.0,6.0,0.0,0.0,0.0,0.0,1.0,1.0,0.0,0.0,0.0,1.0,0.0,0.0,0.0,0.0,0.0,0.0,0.0,0.0,0.0,0.0,0.0,0.0,0.0,0.0
RB12B_HUMAN RNA-binding protein 12B OS=Homo sapiens GN=RBM12B PE=1 SV=2	UNKNOWN	UNKNOWN	0.0,0.0,0.0,0.0,0.0,0.0,0.0,0.0,0.0,0.0,0.0,0.0,0.0,0.0,0.0,0.0,0.0,0.0,0.0,0.0,0.0,0.0,0.0,0.0,0.0,0.0,0.0,0.0,0.0,0.0,0.0,0.0,0.0,0.0,0.0,0.0,0.0,0.0,0.0,0.0,0.0,0.0,1.0,0.0
RS3_CAEEL 40S ribosomal protein S3 OS=Caenorhabditis elegans GN=rps-3 PE=3 SV=1	K02985	UNKNOWN	0.0,0.0,0.0,0.0,0.0,0.0,0.0,0.0,0.0,0.0,1.0,0.0,0.0,0.0,0.0,0.0,0.0,0.0,0.0,0.0,0.0,0.0,0.0,0.0,0.0,0.0,0.0,0.0,0.0,0.0,0.0,0.0,0.0,0.0,0.0,0.0,0.0,0.0,2.0,4.0,0.0,0.0,2.0,1.0
AAE_RAUSE Acetylajmalan esterase OS=Rauvolfia serpentina GN=AAE PE=1 SV=1	UNKNOWN	3.1.1.80	0.0,0.0,0.0,0.0,0.0,0.0,0.0,0.0,0.0,0.0,0.0,0.0,0.0,0.0,0.0,0.0,0.0,0.0,0.0,0.0,0.0,0.0,1.0,0.0,0.0,0.0,0.0,0.0,0.0,0.0,0.0,0.0,0.0,0.0,0.0,0.0,0.0,0.0,0.0,0.0,0.0,0.0,0.0,0.0
RRF_RICCK Ribosome-recycling factor OS=Rickettsia canadensis (strain McKiel) GN=frr PE=3 SV=1	K02838	UNKNOWN	0.0,0.0,0.0,0.0,0.0,0.0,0.0,0.0,0.0,0.0,0.0,0.0,6.0,6.0,4.0,6.0,4.0,3.0,1.0,4.0,0.0,0.0,0.0,0.0,4.0,3.0,0.0,0.0,8.0,3.0,3.0,5.0,2.0,0.0,0.0,0.0,0.0,0.0,0.0,0.0,0.0,0.0,0.0,0.0
MG: Transmembrane protein 260 homolog OS=Dictyostelium discoideum GN=DDB_G0275853 PE=3 SV=2 [Q8MXQ3] Score: 60.1	UNKNOWN	UNKNOWN	1.0,1.0,2.0,0.0,0.0,0.0,0.0,0.0,0.0,0.0,0.0,0.0,0.0,0.0,0.0,0.0,0.0,0.0,0.0,0.0,0.0,0.0,0.0,0.0,0.0,0.0,0.0,0.0,0.0,0.0,0.0,0.0,0.0,0.0,0.0,1.0,0.0,0.0,0.0,0.0,0.0,0.0,0.0,0.0
ATOX1_DICDI Copper transport protein ATOX1 homolog OS=Dictyostelium discoideum GN=atox1 PE=3 SV=2	K07213	UNKNOWN	0.0,0.0,0.0,0.0,0.0,0.0,0.0,0.0,0.0,0.0,0.0,0.0,0.0,0.0,0.0,0.0,0.0,0.0,0.0,0.0,0.0,0.0,0.0,0.0,0.0,0.0,0.0,0.0,0.0,0.0,0.0,0.0,0.0,0.0,0.0,0.0,0.0,0.0,1.0,0.0,0.0,0.0,0.0,0.0
MG: Uncharacterized protein YrhF OS=Bacillus subtilis (strain 168) GN=yrhF PE=4 SV=1 [O05398] Score: 58.2	UNKNOWN	UNKNOWN	6.0,0.0,3.0,1.0,0.0,0.0,0.0,0.0,0.0,0.0,0.0,0.0,2.0,0.0,0.0,2.0,1.0,1.0,0.0,0.0,0.0,0.0,0.0,0.0,0.0,0.0,0.0,0.0,0.0,0.0,0.0,0.0,0.0,0.0,0.0,0.0,0.0,0.0,0.0,0.0,0.0,0.0,0.0,0.0
DNAK_AGGAC Chaperone protein DnaK OS=Aggregatibacter actinomycetemcomitans GN=dnaK PE=3 SV=3	K04043	UNKNOWN	4.0,4.0,27.0,15.0,12.0,11.0,39.0,9.0,7.0,5.0,2.0,9.0,4.0,3.0,3.0,0.0,0.0,1.0,0.0,0.0,12.0,14.0,18.0,13.0,3.0,2.0,3.0,0.0,11.0,8.0,3.0,4.0,2.0,2.0,7.0,8.0,3.0,2.0,9.0,9.0,0.0,4.0,9.0,1.0
DOIS_STRLV 2-deoxy-scyllo-inosose synthase OS=Streptomyces lividus GN=livC PE=3 SV=1	UNKNOWN	4.2.3.124	0.0,0.0,0.0,0.0,0.0,0.0,0.0,0.0,0.0,0.0,0.0,0.0,0.0,0.0,0.0,0.0,0.0,0.0,0.0,0.0,0.0,0.0,0.0,0.0,0.0,0.0,0.0,0.0,0.0,0.0,0.0,0.0,0.0,0.0,0.0,0.0,0.0,0.0,0.0,1.0,0.0,0.0,0.0,0.0
MG: Glutathione biosynthesis bifunctional protein GshAB OS=Streptococcus thermophilus (strain CNRZ 1066) GN=gshAB PE=3 SV=1 [Q5LYY5] Score: 581.0	K01919	6.3.2.2,6.3.2.3	0.0,0.0,0.0,0.0,1.0,0.0,2.0,3.0,0.0,0.0,0.0,1.0,4.0,0.0,1.0,1.0,2.0,2.0,4.0,0.0,0.0,0.0,0.0,0.0,0.0,0.0,0.0,0.0,0.0,0.0,0.0,0.0,0.0,0.0,0.0,0.0,0.0,0.0,0.0,0.0,0.0,0.0,0.0,0.0
MG: General stress protein A OS=Bacillus subtilis (strain 168) GN=gspA PE=1 SV=2 [P25148] Score: 100.0	UNKNOWN	UNKNOWN	0.0,0.0,0.0,0.0,0.0,0.0,0.0,0.0,0.0,0.0,0.0,0.0,0.0,0.0,1.0,0.0,0.0,0.0,0.0,0.0,0.0,0.0,0.0,0.0,0.0,0.0,0.0,0.0,0.0,0.0,0.0,0.0,0.0,0.0,0.0,0.0,0.0,0.0,0.0,0.0,0.0,0.0,0.0,0.0
MG: Probable aspartokinase OS=Methanocaldococcus jannaschii (strain ATCC 43067 / DSM 2661 / JAL-1 / JCM 10045 / NBRC 100440) GN=MJ0571 PE=1 SV=1 [Q57991] Score: 119.0	K00928	2.7.2.4	0.0,0.0,0.0,0.0,0.0,0.0,5.0,2.0,0.0,0.0,0.0,0.0,0.0,0.0,0.0,0.0,0.0,0.0,0.0,0.0,0.0,0.0,0.0,0.0,0.0,0.0,0.0,0.0,0.0,0.0,0.0,0.0,0.0,0.0,0.0,0.0,0.0,0.0,0.0,0.0,0.0,0.0,0.0,6.0
RS20_SALSV 30S ribosomal protein S20 OS=Salmonella schwarzengrund (strain CVM19633) GN=rpsT PE=3 SV=1	K02968	UNKNOWN	0.0,0.0,0.0,0.0,0.0,0.0,0.0,0.0,0.0,0.0,0.0,0.0,0.0,0.0,0.0,0.0,0.0,0.0,0.0,0.0,0.0,0.0,0.0,0.0,0.0,0.0,0.0,0.0,0.0,0.0,0.0,0.0,0.0,0.0,0.0,0.0,0.0,0.0,0.0,0.0,0.0,0.0,1.0,0.0
MG: Repressible alkaline phosphatase OS=Saccharomyces cerevisiae (strain ATCC 204508 / S288c) GN=PHO8 PE=1 SV=2 [P11491] Score: 132.0	K01077	3.1.7.6,3.1.3.1,3.1.3.54	0.0,0.0,0.0,0.0,0.0,0.0,0.0,0.0,0.0,0.0,0.0,0.0,0.0,0.0,0.0,0.0,0.0,0.0,0.0,0.0,0.0,0.0,0.0,0.0,0.0,0.0,0.0,0.0,0.0,0.0,0.0,0.0,0.0,0.0,0.0,0.0,0.0,0.0,0.0,0.0,0.0,5.0,1.0,22.0
MG: Putative thiosulfate sulfurtransferase OS=Saccharopolyspora erythraea GN=cysA PE=1 SV=1 [P16385] Score: 108.0	UNKNOWN	2.8.1.1	0.0,0.0,0.0,0.0,0.0,0.0,0.0,0.0,2.0,3.0,8.0,4.0,8.0,6.0,5.0,3.0,7.0,5.0,5.0,0.0,6.0,1.0,3.0,5.0,0.0,1.0,1.0,1.0,3.0,0.0,0.0,2.0,11.0,12.0,5.0,8.0,0.0,0.0,2.0,3.0,0.0,0.0,0.0,0.0
RS5_METBU 30S ribosomal protein S5 OS=Methanococcoides burtonii (strain DSM 6242 / NBRC 107633 / OCM 468 / ACE-M) GN=rps5 PE=3 SV=1	K02988	UNKNOWN	0.0,0.0,0.0,0.0,0.0,0.0,1.0,0.0,0.0,0.0,0.0,0.0,0.0,0.0,0.0,0.0,0.0,0.0,0.0,0.0,0.0,0.0,0.0,0.0,0.0,0.0,0.0,0.0,0.0,0.0,0.0,0.0,0.0,0.0,0.0,0.0,0.0,0.0,0.0,0.0,0.0,0.0,0.0,0.0
MARH8_XENLA E3 ubiquitin-protein ligase MARCH8 OS=Xenopus laevis GN=march8 PE=2 SV=2	K10656	6.3.2.-	0.0,0.0,0.0,0.0,0.0,0.0,0.0,0.0,0.0,0.0,0.0,0.0,0.0,1.0,0.0,0.0,0.0,0.0,0.0,0.0,0.0,0.0,0.0,1.0,0.0,0.0,0.0,0.0,0.0,0.0,0.0,0.0,0.0,0.0,0.0,0.0,0.0,0.0,0.0,0.0,0.0,0.0,0.0,0.0
RPOC_METI4 DNA-directed RNA polymerase subunit beta OS=Methylacidiphilum infernorum (isolate V4) GN=rpoC PE=3 SV=1	K03046	2.7.7.6	0.0,0.0,2.0,0.0,1.0,2.0,6.0,1.0,1.0,0.0,0.0,0.0,3.0,0.0,3.0,0.0,0.0,0.0,0.0,0.0,0.0,0.0,0.0,0.0,0.0,0.0,0.0,0.0,0.0,0.0,0.0,0.0,0.0,0.0,0.0,3.0,2.0,2.0,0.0,0.0,0.0,0.0,8.0,2.0
MG: Penicillin-binding protein PbpB OS=Mycobacterium smegmatis (strain ATCC 700084 / mc(2)155) GN=pbpB PE=1 SV=1 [A0R022] Score: 278.0	K03587	2.4.1.129	0.0,0.0,0.0,0.0,0.0,0.0,0.0,0.0,0.0,0.0,0.0,0.0,0.0,0.0,0.0,0.0,0.0,0.0,0.0,0.0,0.0,0.0,0.0,0.0,1.0,0.0,0.0,0.0,0.0,0.0,0.0,0.0,0.0,0.0,0.0,0.0,0.0,0.0,0.0,0.0,0.0,0.0,0.0,1.0
HMCS_ARATH Hydroxymethylglutaryl-CoA synthase OS=Arabidopsis thaliana GN=HMGS PE=1 SV=2	K01641	2.3.3.10	0.0,1.0,0.0,0.0,0.0,0.0,0.0,0.0,0.0,0.0,0.0,0.0,0.0,0.0,0.0,0.0,0.0,0.0,0.0,0.0,0.0,0.0,0.0,0.0,0.0,0.0,0.0,0.0,0.0,0.0,0.0,0.0,0.0,0.0,0.0,0.0,0.0,0.0,0.0,0.0,0.0,0.0,0.0,0.0
MG: Macrolide export ATP-binding/permease protein MacB OS=Bdellovibrio bacteriovorus (strain ATCC 15356 / DSM 50701 / NCIB 9529 / HD100) GN=macB PE=3 SV=1 [Q6MPX9] Score: 220.0	K05685	3.6.3.-	0.0,0.0,0.0,0.0,0.0,1.0,0.0,0.0,0.0,0.0,0.0,0.0,0.0,1.0,0.0,0.0,3.0,0.0,0.0,1.0,0.0,0.0,0.0,0.0,0.0,1.0,0.0,0.0,0.0,0.0,0.0,0.0,1.0,0.0,0.0,0.0,0.0,1.0,0.0,0.0,0.0,0.0,0.0,0.0
RHO_RHOS4 Transcription termination factor Rho OS=Rhodobacter sphaeroides (strain ATCC 17023 / 2.4.1 / NCIB 8253 / DSM 158) GN=rho PE=3 SV=1	K03628	3.6.4.-	0.0,0.0,0.0,0.0,0.0,0.0,1.0,0.0,0.0,0.0,0.0,0.0,0.0,0.0,0.0,0.0,0.0,0.0,0.0,0.0,0.0,0.0,0.0,0.0,0.0,0.0,0.0,0.0,0.0,0.0,0.0,0.0,0.0,0.0,0.0,0.0,0.0,0.0,0.0,0.0,0.0,0.0,0.0,0.0
MG: NADH-quinone oxidoreductase subunit A OS=Geobacillus kaustophilus (strain HTA426) GN=nuoA PE=3 SV=1 [Q5KUJ5] Score: 96.7	K00330	1.6.5.11	0.0,0.0,0.0,0.0,0.0,0.0,0.0,0.0,0.0,0.0,0.0,0.0,0.0,0.0,0.0,0.0,0.0,0.0,0.0,0.0,0.0,0.0,0.0,0.0,0.0,0.0,0.0,0.0,0.0,0.0,0.0,0.0,0.0,0.0,0.0,0.0,0.0,0.0,0.0,0.0,1.0,1.0,1.0,0.0
GLUB4_ORYSJ Glutelin type-B 4 OS=Oryza sativa subsp. japonica GN=GLUB4 PE=1 SV=1	UNKNOWN	UNKNOWN	16.0,7.0,8.0,7.0,0.0,4.0,25.0,29.0,3.0,10.0,12.0,15.0,0.0,2.0,0.0,0.0,2.0,0.0,0.0,0.0,0.0,0.0,4.0,5.0,3.0,2.0,0.0,1.0,0.0,0.0,0.0,0.0,2.0,2.0,11.0,5.0,0.0,2.0,0.0,0.0,0.0,0.0,0.0,0.0
MG: Probable acetyl-CoA acetyltransferase OS=Escherichia coli (strain K12) GN=yqeF PE=3 SV=2 [Q46939] Score: 125.0	K00626	2.3.1.9	0.0,0.0,0.0,0.0,0.0,0.0,0.0,0.0,0.0,0.0,0.0,0.0,0.0,0.0,0.0,0.0,0.0,0.0,0.0,0.0,0.0,0.0,0.0,0.0,0.0,0.0,0.0,0.0,0.0,0.0,0.0,0.0,0.0,0.0,0.0,0.0,0.0,0.0,0.0,2.0,0.0,0.0,0.0,0.0
MG: Probable S-adenosyl-L-methionine-binding protein PYRAB06630 OS=Pyrococcus abyssi (strain GE5 / Orsay) GN=PYRAB06630 PE=3 SV=1 [Q9V0X6] Score: 171.0	UNKNOWN	UNKNOWN	0.0,0.0,0.0,0.0,2.0,0.0,0.0,1.0,0.0,0.0,0.0,0.0,0.0,0.0,0.0,0.0,2.0,1.0,0.0,0.0,0.0,0.0,0.0,0.0,0.0,0.0,0.0,0.0,0.0,0.0,0.0,0.0,0.0,0.0,0.0,0.0,0.0,0.0,0.0,0.0,0.0,0.0,0.0,0.0
MG: Probable Xaa-Pro aminopeptidase NECHADRAFT_60613 OS=Nectria haematococca (strain 77-13-4 / ATCC MYA-4622 / FGSC 9596 / MPVI) GN=NECHADRAFT_60613 PE=3 SV=1 [C7Z837] Score: 179.0	K14213	3.4.11.9	0.0,0.0,0.0,0.0,0.0,0.0,0.0,0.0,0.0,0.0,0.0,0.0,0.0,0.0,0.0,0.0,0.0,0.0,0.0,0.0,2.0,2.0,0.0,0.0,0.0,0.0,0.0,0.0,0.0,0.0,0.0,0.0,0.0,0.0,0.0,0.0,0.0,0.0,0.0,0.0,0.0,0.0,0.0,0.0
MG: Endo-1,4-beta-xylanase A OS=Butyrivibrio fibrisolvens GN=xynA PE=3 SV=1 [P23551] Score: 370.0	UNKNOWN	3.2.1.8	6.0,6.0,11.0,9.0,0.0,0.0,0.0,4.0,0.0,1.0,2.0,0.0,0.0,0.0,0.0,0.0,0.0,0.0,0.0,0.0,0.0,0.0,0.0,0.0,0.0,0.0,0.0,0.0,0.0,9.0,0.0,0.0,0.0,0.0,0.0,0.0,15.0,2.0,0.0,0.0,0.0,0.0,0.0,0.0
RL5_ECOLU 50S ribosomal protein L5 OS=Escherichia coli O17:K52:H18 (strain UMN026 / ExPEC) GN=rplE PE=3 SV=1	K02931	UNKNOWN	0.0,0.0,2.0,0.0,0.0,0.0,0.0,0.0,0.0,0.0,0.0,0.0,0.0,0.0,0.0,0.0,0.0,0.0,0.0,0.0,0.0,0.0,0.0,0.0,0.0,0.0,0.0,0.0,0.0,0.0,0.0,0.0,0.0,0.0,0.0,0.0,1.0,0.0,0.0,1.0,0.0,0.0,23.0,4.0
MG: Dihydrolipoyl dehydrogenase OS=Escherichia coli O157:H7 GN=lpdA PE=3 SV=2 [P0A9P2] Score: 271.0	K00382	1.8.1.4	0.0,0.0,0.0,0.0,0.0,0.0,0.0,0.0,0.0,0.0,0.0,0.0,0.0,0.0,0.0,0.0,0.0,0.0,0.0,0.0,0.0,0.0,0.0,0.0,0.0,0.0,0.0,0.0,0.0,0.0,0.0,0.0,0.0,0.0,0.0,0.0,0.0,0.0,0.0,0.0,0.0,0.0,28.0,0.0
FABP6_RABIT Gastrotropin OS=Oryctolagus cuniculus GN=FABP6 PE=3 SV=2	K08755	UNKNOWN	0.0,0.0,0.0,0.0,0.0,0.0,0.0,0.0,0.0,0.0,0.0,0.0,0.0,0.0,0.0,0.0,0.0,0.0,0.0,0.0,0.0,0.0,0.0,0.0,0.0,0.0,0.0,0.0,1.0,0.0,0.0,1.0,0.0,0.0,0.0,0.0,0.0,0.0,0.0,0.0,0.0,0.0,0.0,0.0
TSAD_KOSOT tRNA N6-adenosine threonylcarbamoyltransferase OS=Kosmotoga olearia (strain TBF 19.5.1) GN=tsaD PE=3 SV=1	K01409	2.3.1.234	0.0,0.0,0.0,0.0,0.0,0.0,0.0,0.0,0.0,0.0,0.0,0.0,0.0,0.0,0.0,0.0,0.0,0.0,0.0,0.0,0.0,0.0,0.0,0.0,0.0,0.0,0.0,0.0,0.0,0.0,0.0,0.0,0.0,0.0,0.0,0.0,0.0,0.0,0.0,1.0,0.0,0.0,0.0,0.0
TBB6_ORYSJ Tubulin beta-6 chain OS=Oryza sativa subsp. japonica GN=TUBB6 PE=2 SV=1	K07375	UNKNOWN	0.0,0.0,0.0,0.0,1.0,1.0,9.0,7.0,8.0,6.0,10.0,9.0,0.0,0.0,0.0,0.0,0.0,0.0,0.0,0.0,6.0,7.0,2.0,2.0,0.0,0.0,0.0,0.0,3.0,0.0,1.0,4.0,0.0,0.0,1.0,0.0,1.0,4.0,8.0,6.0,0.0,0.0,0.0,0.0
CHKA_RAT Choline kinase alpha OS=Rattus norvegicus GN=Chka PE=2 SV=2	K14156	2.7.1.82,2.7.1.32	0.0,0.0,0.0,0.0,2.0,6.0,2.0,4.0,0.0,1.0,0.0,3.0,0.0,0.0,0.0,0.0,0.0,0.0,0.0,0.0,3.0,5.0,0.0,0.0,0.0,0.0,0.0,0.0,0.0,0.0,0.0,0.0,0.0,0.0,0.0,0.0,0.0,0.0,3.0,3.0,0.0,1.0,0.0,3.0
1433B_HORVU 14-3-3-like protein B OS=Hordeum vulgare PE=2 SV=1	UNKNOWN	UNKNOWN	1.0,0.0,1.0,0.0,3.0,4.0,0.0,0.0,0.0,2.0,4.0,0.0,0.0,0.0,0.0,0.0,0.0,0.0,0.0,0.0,0.0,0.0,2.0,0.0,0.0,0.0,0.0,0.0,0.0,0.0,0.0,0.0,0.0,0.0,0.0,0.0,0.0,0.0,1.0,1.0,0.0,2.0,0.0,2.0
MG: Galactokinase OS=Vibrio parahaemolyticus serotype O3:K6 (strain RIMD 2210633) GN=galK PE=3 SV=1 [Q87M60] Score: 49.7	K00849	2.7.1.6	0.0,0.0,0.0,0.0,0.0,0.0,1.0,0.0,0.0,0.0,0.0,0.0,0.0,0.0,0.0,0.0,0.0,0.0,0.0,0.0,0.0,0.0,0.0,0.0,0.0,1.0,0.0,0.0,0.0,0.0,0.0,0.0,0.0,0.0,0.0,0.0,0.0,0.0,0.0,0.0,0.0,0.0,0.0,0.0
LARGE_DANRE Glycosyltransferase-like protein LARGE1 OS=Danio rerio GN=large PE=2 SV=1	K09668	2.4.1.-,2.4.2.-,2.4.-.-	0.0,0.0,0.0,0.0,0.0,0.0,0.0,0.0,0.0,0.0,0.0,0.0,0.0,0.0,0.0,0.0,0.0,0.0,0.0,0.0,1.0,0.0,0.0,0.0,0.0,0.0,0.0,0.0,0.0,0.0,0.0,0.0,0.0,0.0,0.0,0.0,0.0,0.0,0.0,0.0,0.0,0.0,0.0,0.0
ERA_LACPL GTPase Era OS=Lactobacillus plantarum (strain ATCC BAA-793 / NCIMB 8826 / WCFS1) GN=era PE=3 SV=1	K03595	UNKNOWN	0.0,0.0,0.0,0.0,0.0,0.0,0.0,0.0,0.0,0.0,0.0,0.0,0.0,0.0,0.0,0.0,0.0,1.0,0.0,0.0,0.0,0.0,0.0,0.0,0.0,0.0,0.0,0.0,0.0,0.0,0.0,0.0,0.0,0.0,0.0,0.0,0.0,0.0,0.0,0.0,0.0,0.0,0.0,0.0
RSSA_BRANA 40S ribosomal protein SA OS=Brassica napus GN=LRP PE=2 SV=1	K02998	UNKNOWN	0.0,0.0,0.0,0.0,0.0,1.0,0.0,0.0,0.0,0.0,0.0,0.0,0.0,0.0,0.0,0.0,0.0,0.0,0.0,0.0,0.0,0.0,0.0,0.0,0.0,0.0,0.0,0.0,0.0,0.0,1.0,0.0,0.0,0.0,0.0,0.0,0.0,0.0,0.0,0.0,0.0,0.0,0.0,0.0
MG: Bifunctional enzyme IspD/IspF OS=Desulfotalea psychrophila (strain LSv54 / DSM 12343) GN=ispDF PE=3 SV=2 [Q6ARN9] Score: 246.0	K12506	4.6.1.12,2.7.7.60	0.0,1.0,0.0,0.0,0.0,0.0,0.0,0.0,0.0,0.0,0.0,0.0,0.0,0.0,0.0,0.0,0.0,0.0,0.0,0.0,0.0,0.0,0.0,0.0,0.0,0.0,0.0,0.0,0.0,0.0,0.0,0.0,0.0,0.0,0.0,0.0,0.0,0.0,0.0,0.0,0.0,0.0,0.0,0.0
MG: 50S ribosomal protein L23 OS=Eubacterium rectale (strain ATCC 33656 / VPI 0990) GN=rplW PE=3 SV=1 [C4ZBS1] Score: 135.0	K02892	UNKNOWN	1.0,2.0,26.0,28.0,1.0,0.0,0.0,0.0,0.0,0.0,0.0,0.0,5.0,8.0,7.0,5.0,6.0,1.0,0.0,9.0,0.0,0.0,0.0,0.0,0.0,0.0,0.0,0.0,0.0,2.0,0.0,0.0,0.0,0.0,0.0,0.0,0.0,0.0,0.0,0.0,1.0,0.0,0.0,0.0
UBP24_ARATH Ubiquitin carboxyl-terminal hydrolase 24 OS=Arabidopsis thaliana GN=UBP24 PE=1 SV=1	K11841	3.4.19.12	0.0,0.0,0.0,0.0,0.0,0.0,0.0,0.0,0.0,0.0,0.0,0.0,0.0,0.0,0.0,0.0,1.0,0.0,0.0,0.0,0.0,0.0,0.0,0.0,0.0,0.0,0.0,0.0,0.0,0.0,0.0,0.0,0.0,0.0,0.0,0.0,0.0,0.0,0.0,0.0,0.0,0.0,0.0,0.0
MG: Butyrate--acetoacetate CoA-transferase subunit A OS=Clostridium acetobutylicum (strain ATCC 824 / DSM 792 / JCM 1419 / LMG 5710 / VKM B-1787) GN=ctfA PE=1 SV=1 [P33752] Score: 227.0	K01034	2.8.3.9	0.0,0.0,0.0,0.0,0.0,0.0,7.0,8.0,3.0,1.0,1.0,0.0,0.0,0.0,0.0,0.0,0.0,0.0,0.0,0.0,0.0,3.0,0.0,0.0,0.0,0.0,0.0,0.0,3.0,3.0,6.0,3.0,0.0,0.0,2.0,0.0,0.0,0.0,0.0,0.0,0.0,0.0,0.0,1.0
MG: Uncharacterized ABC transporter ATP-binding protein YhcG OS=Bacillus subtilis (strain 168) GN=yhcG PE=3 SV=1 [P54591] Score: 186.0	K01990	UNKNOWN	3.0,0.0,0.0,0.0,0.0,0.0,0.0,0.0,0.0,0.0,2.0,3.0,2.0,0.0,0.0,0.0,0.0,0.0,0.0,0.0,0.0,0.0,0.0,0.0,5.0,2.0,1.0,1.0,0.0,0.0,0.0,0.0,0.0,0.0,1.0,0.0,0.0,0.0,0.0,0.0,0.0,0.0,0.0,0.0
MG: Endo-1,4-beta-xylanase B OS=Butyrivibrio fibrisolvens GN=xynB PE=3 SV=1 [P26223] Score: 125.0	UNKNOWN	3.2.1.8	0.0,0.0,2.0,0.0,0.0,2.0,0.0,0.0,0.0,0.0,0.0,0.0,0.0,0.0,0.0,0.0,0.0,0.0,0.0,0.0,0.0,0.0,0.0,0.0,0.0,0.0,0.0,0.0,0.0,0.0,0.0,0.0,0.0,0.0,1.0,0.0,0.0,1.0,0.0,0.0,0.0,0.0,0.0,0.0
MG: Glyoxylate reductase OS=Korarchaeum cryptofilum (strain OPF8) GN=gyaR PE=3 SV=1 [B1L765] Score: 307.0	K00015	1.1.1.26	0.0,0.0,0.0,0.0,0.0,0.0,1.0,0.0,0.0,0.0,0.0,0.0,0.0,0.0,0.0,0.0,0.0,0.0,0.0,0.0,0.0,0.0,0.0,0.0,0.0,0.0,0.0,1.0,0.0,0.0,0.0,0.0,0.0,0.0,0.0,0.0,0.0,0.0,0.0,0.0,0.0,0.0,0.0,0.0
MG: Plectin OS=Homo sapiens GN=PLEC PE=1 SV=3 [Q15149] Score: 51.6	K10388	UNKNOWN	0.0,0.0,0.0,0.0,0.0,0.0,0.0,0.0,0.0,0.0,0.0,0.0,0.0,0.0,0.0,0.0,0.0,0.0,0.0,0.0,0.0,0.0,0.0,0.0,0.0,0.0,0.0,0.0,0.0,0.0,0.0,0.0,0.0,0.0,0.0,0.0,0.0,0.0,0.0,0.0,0.0,0.0,0.0,1.0
ILVC_NOSS1 Ketol-acid reductoisomerase OS=Nostoc sp. (strain PCC 7120 / UTEX 2576) GN=ilvC PE=3 SV=1	K00053	1.1.1.86	0.0,0.0,0.0,0.0,0.0,0.0,0.0,0.0,0.0,0.0,0.0,0.0,0.0,0.0,3.0,0.0,0.0,0.0,0.0,0.0,0.0,0.0,1.0,3.0,7.0,2.0,2.0,4.0,0.0,0.0,0.0,0.0,0.0,0.0,0.0,0.0,0.0,0.0,0.0,0.0,0.0,0.0,2.0,3.0
CHEB_METMP Chemotaxis response regulator protein-glutamate methylesterase OS=Methanococcus maripaludis (strain S2 / LL) GN=cheB PE=3 SV=1	K03412	3.1.1.61	0.0,0.0,0.0,0.0,0.0,0.0,0.0,0.0,0.0,0.0,0.0,0.0,1.0,0.0,0.0,0.0,0.0,0.0,0.0,0.0,0.0,0.0,0.0,0.0,0.0,0.0,0.0,0.0,0.0,0.0,0.0,0.0,0.0,0.0,0.0,0.0,0.0,0.0,0.0,0.0,0.0,0.0,0.0,0.0
MG: Neopullulanase OS=Geobacillus stearothermophilus GN=nplT PE=1 SV=1 [P38940] Score: 156.0	UNKNOWN	3.2.1.135	0.0,0.0,0.0,0.0,0.0,0.0,0.0,0.0,0.0,0.0,0.0,0.0,2.0,0.0,0.0,0.0,0.0,0.0,0.0,0.0,0.0,0.0,0.0,0.0,0.0,0.0,0.0,0.0,0.0,0.0,0.0,0.0,0.0,0.0,0.0,0.0,0.0,0.0,0.0,0.0,0.0,0.0,0.0,0.0
MG: Spermidine/putrescine transport system permease protein PotC OS=Escherichia coli O157:H7 GN=potC PE=3 SV=1 [P0AFK8] Score: 173.0	K11070	UNKNOWN	0.0,0.0,0.0,0.0,0.0,0.0,0.0,0.0,0.0,0.0,0.0,0.0,0.0,0.0,0.0,0.0,0.0,1.0,0.0,0.0,0.0,0.0,0.0,0.0,0.0,0.0,0.0,0.0,0.0,0.0,0.0,0.0,0.0,0.0,0.0,0.0,0.0,0.0,0.0,0.0,0.0,0.0,0.0,0.0
RS5_METS4 30S ribosomal protein S5 OS=Methylobacterium sp. (strain 4-46) GN=rpsE PE=3 SV=1	K02988	UNKNOWN	0.0,0.0,0.0,0.0,0.0,0.0,20.0,0.0,0.0,0.0,0.0,0.0,0.0,0.0,0.0,0.0,1.0,0.0,0.0,0.0,0.0,0.0,0.0,0.0,0.0,0.0,0.0,0.0,0.0,0.0,0.0,0.0,0.0,0.0,0.0,0.0,0.0,0.0,0.0,0.0,0.0,0.0,0.0,0.0
MG: Guanine/hypoxanthine permease PbuG OS=Bacillus subtilis (strain 168) GN=pbuG PE=1 SV=1 [O34987] Score: 491.0	K06901	UNKNOWN	0.0,0.0,0.0,0.0,0.0,0.0,0.0,0.0,0.0,0.0,0.0,0.0,0.0,0.0,0.0,0.0,0.0,0.0,0.0,0.0,0.0,0.0,0.0,0.0,1.0,1.0,1.0,3.0,0.0,0.0,0.0,0.0,0.0,0.0,2.0,0.0,0.0,0.0,0.0,0.0,0.0,0.0,0.0,0.0
MG: Putative ABC transporter peptide-binding protein BMEII0859 OS=Brucella melitensis biotype 1 (strain 16M / ATCC 23456 / NCTC 10094) GN=BMEII0859 PE=3 SV=2 [Q8YBP0] Score: 114.0	K02035	UNKNOWN	0.0,0.0,0.0,0.0,0.0,0.0,0.0,0.0,0.0,1.0,3.0,2.0,4.0,0.0,3.0,1.0,2.0,9.0,1.0,2.0,0.0,1.0,0.0,0.0,0.0,0.0,1.0,0.0,0.0,0.0,0.0,2.0,3.0,1.0,0.0,1.0,1.0,0.0,0.0,0.0,0.0,0.0,0.0,0.0
RPOC2_PROMM DNA-directed RNA polymerase subunit beta' OS=Prochlorococcus marinus (strain MIT 9313) GN=rpoC2 PE=3 SV=1	UNKNOWN	2.7.7.6	0.0,0.0,0.0,0.0,1.0,1.0,0.0,0.0,0.0,0.0,0.0,0.0,0.0,0.0,2.0,5.0,1.0,0.0,0.0,0.0,0.0,0.0,0.0,0.0,1.0,0.0,0.0,0.0,0.0,0.0,0.0,0.0,0.0,0.0,0.0,0.0,0.0,0.0,0.0,0.0,0.0,0.0,0.0,0.0
MG: Sorbitol dehydrogenase OS=Ovis aries GN=SORD PE=1 SV=1 [P07846] Score: 146.0	UNKNOWN	1.1.1.14	0.0,0.0,0.0,0.0,0.0,0.0,0.0,0.0,0.0,0.0,0.0,0.0,0.0,0.0,0.0,0.0,0.0,0.0,0.0,0.0,0.0,0.0,0.0,0.0,0.0,0.0,0.0,0.0,0.0,0.0,0.0,0.0,0.0,0.0,0.0,0.0,0.0,1.0,0.0,0.0,0.0,0.0,0.0,0.0
NIKR2_METTH Putative nickel-responsive regulator 2 OS=Methanothermobacter thermautotrophicus (strain ATCC 29096 / DSM 1053 / JCM 10044 / NBRC 100330 / Delta H) GN=MTH_739 PE=3 SV=1	K07722	UNKNOWN	0.0,0.0,0.0,0.0,0.0,0.0,0.0,0.0,0.0,0.0,0.0,0.0,0.0,0.0,0.0,0.0,0.0,0.0,0.0,0.0,0.0,0.0,0.0,0.0,0.0,0.0,0.0,0.0,0.0,0.0,0.0,0.0,0.0,0.0,0.0,0.0,0.0,0.0,0.0,0.0,0.0,0.0,1.0,0.0
MG: Bifunctional hemolysin/adenylate cyclase OS=Bordetella pertussis (strain ATCC 9797 / DSM 5571 / NCTC 10739 / 18323) GN=cya PE=3 SV=2 [J7QLC0] Score: 79.0	K11029,K11005	4.6.1.1	0.0,0.0,0.0,0.0,0.0,0.0,4.0,3.0,0.0,0.0,0.0,0.0,0.0,0.0,0.0,0.0,0.0,0.0,0.0,0.0,0.0,0.0,0.0,0.0,0.0,0.0,0.0,0.0,0.0,0.0,0.0,0.0,0.0,0.0,0.0,0.0,0.0,0.0,0.0,0.0,0.0,0.0,0.0,0.0
SSB1_STRCO Single-stranded DNA-binding protein 1 OS=Streptomyces coelicolor (strain ATCC BAA-471 / A3(2) / M145) GN=ssb1 PE=1 SV=1	K03111	UNKNOWN	0.0,0.0,0.0,0.0,0.0,0.0,0.0,0.0,0.0,0.0,0.0,0.0,0.0,0.0,0.0,0.0,0.0,0.0,0.0,0.0,0.0,0.0,0.0,0.0,0.0,0.0,1.0,0.0,0.0,0.0,0.0,0.0,0.0,0.0,0.0,0.0,0.0,0.0,0.0,0.0,0.0,0.0,0.0,0.0
G6PI_PSYIN Glucose-6-phosphate isomerase OS=Psychromonas ingrahamii (strain 37) GN=pgi PE=3 SV=1	K01810	5.3.1.9	0.0,0.0,0.0,0.0,0.0,0.0,0.0,0.0,0.0,0.0,0.0,0.0,0.0,0.0,0.0,0.0,0.0,0.0,0.0,0.0,0.0,0.0,0.0,0.0,0.0,0.0,0.0,0.0,0.0,0.0,0.0,0.0,0.0,0.0,0.0,0.0,0.0,1.0,0.0,0.0,0.0,0.0,0.0,0.0
DNLJ_ALKEH DNA ligase OS=Alkalilimnicola ehrlichii (strain ATCC BAA-1101 / DSM 17681 / MLHE-1) GN=ligA PE=3 SV=1	K01972	6.5.1.2	0.0,0.0,0.0,0.0,0.0,0.0,0.0,0.0,0.0,0.0,0.0,0.0,0.0,0.0,0.0,0.0,0.0,0.0,0.0,0.0,0.0,0.0,0.0,0.0,0.0,0.0,0.0,0.0,0.0,0.0,0.0,0.0,0.0,0.0,0.0,0.0,0.0,1.0,0.0,0.0,0.0,0.0,0.0,0.0
TENS1_HUMAN Tensin-1 OS=Homo sapiens GN=TNS1 PE=1 SV=2	K18080	UNKNOWN	0.0,0.0,0.0,0.0,0.0,0.0,0.0,0.0,0.0,0.0,0.0,0.0,0.0,0.0,0.0,1.0,0.0,0.0,0.0,0.0,0.0,0.0,0.0,0.0,0.0,0.0,0.0,0.0,0.0,0.0,0.0,0.0,0.0,0.0,0.0,0.0,0.0,0.0,0.0,0.0,0.0,0.0,0.0,0.0
MG: Energy-coupling factor transporter transmembrane protein EcfT OS=Thermosediminibacter oceani (strain ATCC BAA-1034 / DSM 16646 / JW/IW-1228P) GN=ecfT PE=3 SV=1 [D9RZP4] Score: 281.0	K16785	UNKNOWN	0.0,0.0,0.0,0.0,0.0,0.0,0.0,0.0,0.0,0.0,0.0,0.0,7.0,5.0,9.0,3.0,2.0,1.0,1.0,2.0,0.0,0.0,1.0,0.0,0.0,0.0,0.0,0.0,0.0,0.0,0.0,0.0,0.0,0.0,0.0,0.0,0.0,0.0,0.0,0.0,0.0,0.0,0.0,1.0
SODM_MYCIA Superoxide dismutase [Mn] OS=Mycobacterium intracellulare (strain ATCC 13950 / DSM 43223 / JCM 6384 / NCTC 13025 / 3600) GN=sodA PE=3 SV=3	K04564	1.15.1.1	0.0,0.0,0.0,0.0,0.0,0.0,0.0,0.0,0.0,0.0,0.0,0.0,1.0,0.0,0.0,0.0,0.0,0.0,0.0,0.0,0.0,0.0,0.0,0.0,33.0,23.0,17.0,6.0,0.0,0.0,0.0,0.0,4.0,10.0,7.0,6.0,0.0,0.0,3.0,3.0,0.0,0.0,0.0,0.0
MG: Isoaspartyl peptidase OS=Escherichia coli (strain K12) GN=iaaA PE=1 SV=2 [P37595] Score: 268.0	K13051	3.4.19.5	0.0,0.0,0.0,0.0,1.0,0.0,0.0,0.0,0.0,0.0,0.0,0.0,0.0,0.0,0.0,0.0,0.0,0.0,0.0,0.0,0.0,0.0,0.0,0.0,0.0,0.0,0.0,0.0,0.0,0.0,0.0,0.0,0.0,0.0,0.0,0.0,0.0,0.0,0.0,0.0,0.0,0.0,0.0,0.0
MG: Uncharacterized ABC transporter ATP-binding protein YkpA OS=Bacillus subtilis (strain 168) GN=ykpA PE=3 SV=1 [O31716] Score: 153.0	UNKNOWN	UNKNOWN	0.0,0.0,0.0,0.0,0.0,0.0,0.0,0.0,0.0,0.0,0.0,0.0,1.0,0.0,0.0,0.0,0.0,0.0,0.0,0.0,0.0,0.0,0.0,0.0,0.0,0.0,0.0,0.0,0.0,0.0,0.0,0.0,0.0,0.0,0.0,0.0,0.0,0.0,0.0,0.0,0.0,0.0,0.0,0.0
FEN1_BABBO Flap endonuclease 1 OS=Babesia bovis GN=FEN1 PE=3 SV=1	K04799	3.1.-.-	0.0,0.0,0.0,0.0,0.0,0.0,0.0,0.0,0.0,0.0,0.0,0.0,27.0,12.0,13.0,16.0,18.0,24.0,10.0,11.0,0.0,0.0,0.0,0.0,0.0,0.0,0.0,0.0,0.0,0.0,0.0,0.0,0.0,0.0,0.0,0.0,0.0,0.0,0.0,0.0,0.0,0.0,0.0,0.0
ATPG_TOBAC ATP synthase gamma chain, chloroplastic OS=Nicotiana tabacum GN=ATPC PE=1 SV=1	UNKNOWN	UNKNOWN	0.0,0.0,0.0,0.0,3.0,1.0,4.0,6.0,0.0,0.0,0.0,0.0,0.0,0.0,0.0,0.0,0.0,0.0,0.0,0.0,0.0,0.0,0.0,0.0,0.0,0.0,0.0,0.0,4.0,3.0,1.0,4.0,0.0,0.0,0.0,0.0,0.0,0.0,0.0,0.0,0.0,0.0,0.0,0.0
MG: Uncharacterized HTH-type transcriptional regulator YdeC OS=Bacillus subtilis (strain 168) GN=ydeC PE=3 SV=1 [P96660] Score: 138.0	UNKNOWN	UNKNOWN	0.0,0.0,0.0,0.0,0.0,0.0,0.0,1.0,0.0,0.0,0.0,0.0,0.0,0.0,0.0,0.0,0.0,0.0,0.0,1.0,0.0,0.0,0.0,0.0,0.0,0.0,0.0,0.0,0.0,0.0,0.0,0.0,0.0,0.0,0.0,0.0,0.0,0.0,0.0,0.0,0.0,0.0,0.0,0.0
MG: Uncharacterized glycosyltransferase MJ1178 OS=Methanocaldococcus jannaschii (strain ATCC 43067 / DSM 2661 / JAL-1 / JCM 10045 / NBRC 100440) GN=MJ1178 PE=3 SV=1 [Q58577] Score: 76.3	UNKNOWN	2.4.-.-	0.0,0.0,0.0,0.0,0.0,0.0,0.0,0.0,0.0,0.0,0.0,0.0,1.0,0.0,0.0,0.0,0.0,0.0,0.0,0.0,0.0,1.0,0.0,1.0,1.0,2.0,2.0,0.0,0.0,0.0,0.0,0.0,7.0,1.0,2.0,7.0,3.0,3.0,1.0,1.0,0.0,0.0,0.0,0.0
AP2A_YEAST AP-2 complex subunit alpha OS=Saccharomyces cerevisiae (strain ATCC 204508 / S288c) GN=APL3 PE=1 SV=1	K11824	UNKNOWN	0.0,0.0,0.0,0.0,0.0,0.0,0.0,0.0,1.0,1.0,0.0,0.0,0.0,0.0,0.0,0.0,0.0,0.0,0.0,0.0,0.0,0.0,0.0,0.0,0.0,0.0,0.0,0.0,0.0,0.0,0.0,0.0,0.0,0.0,0.0,0.0,0.0,0.0,0.0,0.0,0.0,0.0,0.0,0.0
MG: HTH-type transcriptional activator CmpR OS=Synechocystis sp. (strain PCC 6803 / Kazusa) GN=cmpR PE=1 SV=1 [Q55459] Score: 87.0	UNKNOWN	UNKNOWN	0.0,0.0,0.0,0.0,0.0,0.0,0.0,0.0,0.0,0.0,0.0,0.0,0.0,0.0,0.0,0.0,0.0,0.0,0.0,0.0,0.0,0.0,0.0,0.0,0.0,0.0,0.0,0.0,0.0,0.0,0.0,0.0,0.0,0.0,0.0,0.0,0.0,0.0,0.0,0.0,0.0,0.0,1.0,0.0
MG: Fumarylacetoacetate hydrolase domain-containing protein 2 OS=Rattus norvegicus GN=Fahd2 PE=1 SV=1 [B2RYW9] Score: 229.0	UNKNOWN	3.-.-.-	0.0,0.0,0.0,0.0,0.0,0.0,1.0,0.0,0.0,0.0,0.0,0.0,0.0,0.0,0.0,1.0,0.0,0.0,0.0,0.0,0.0,0.0,0.0,0.0,1.0,0.0,0.0,0.0,0.0,0.0,0.0,0.0,0.0,0.0,0.0,0.0,0.0,0.0,0.0,0.0,0.0,0.0,0.0,0.0
MG: Uncharacterized RNA methyltransferase tlr0942 OS=Thermosynechococcus elongatus (strain BP-1) GN=tlr0942 PE=3 SV=1 [Q8DKB7] Score: 52.8	K03215	2.1.1.-	0.0,0.0,0.0,0.0,0.0,0.0,0.0,0.0,0.0,0.0,0.0,0.0,1.0,1.0,0.0,0.0,0.0,0.0,0.0,0.0,0.0,0.0,0.0,0.0,0.0,0.0,0.0,0.0,0.0,0.0,0.0,0.0,0.0,0.0,0.0,0.0,0.0,0.0,0.0,0.0,0.0,0.0,0.0,0.0
MG: Xylose isomerase OS=Thermus caldophilus GN=xylA PE=1 SV=1 [P56681] Score: 80.1	UNKNOWN	5.3.1.5	0.0,0.0,0.0,0.0,0.0,0.0,2.0,3.0,0.0,1.0,1.0,1.0,0.0,0.0,0.0,0.0,0.0,0.0,0.0,0.0,1.0,1.0,0.0,2.0,0.0,0.0,0.0,0.0,0.0,0.0,0.0,0.0,0.0,0.0,0.0,0.0,0.0,2.0,0.0,0.0,0.0,0.0,0.0,0.0
EIF3K_BOVIN Eukaryotic translation initiation factor 3 subunit K OS=Bos taurus GN=EIF3K PE=2 SV=1	K15028	UNKNOWN	0.0,0.0,0.0,0.0,0.0,0.0,0.0,0.0,0.0,0.0,0.0,0.0,0.0,0.0,0.0,0.0,0.0,0.0,0.0,0.0,0.0,0.0,1.0,1.0,0.0,0.0,0.0,0.0,0.0,0.0,0.0,0.0,0.0,0.0,0.0,0.0,0.0,0.0,0.0,0.0,0.0,0.0,0.0,0.0
RTCA_STAMF RNA 3'-terminal phosphate cyclase OS=Staphylothermus marinus (strain ATCC 43588 / DSM 3639 / JCM 9404 / F1) GN=rtcA PE=3 SV=2	K01974	6.5.1.4	0.0,0.0,0.0,0.0,0.0,0.0,0.0,0.0,0.0,0.0,0.0,0.0,0.0,0.0,0.0,0.0,0.0,0.0,0.0,0.0,1.0,0.0,0.0,0.0,0.0,0.0,0.0,0.0,0.0,0.0,0.0,0.0,0.0,0.0,0.0,0.0,0.0,0.0,0.0,0.0,0.0,0.0,0.0,0.0
MG: Uncharacterized hydrolase YxeP OS=Bacillus subtilis (strain 168) GN=yxeP PE=1 SV=2 [P54955] Score: 301.0	K01436	3.-.-.-	0.0,0.0,0.0,0.0,0.0,0.0,0.0,0.0,0.0,3.0,1.0,1.0,0.0,0.0,0.0,0.0,0.0,0.0,0.0,0.0,0.0,0.0,0.0,0.0,0.0,0.0,0.0,0.0,0.0,0.0,0.0,0.0,0.0,0.0,0.0,0.0,0.0,0.0,0.0,0.0,0.0,0.0,0.0,0.0
LEUC_PROMT 3-isopropylmalate dehydratase large subunit OS=Prochlorococcus marinus (strain NATL2A) GN=leuC PE=3 SV=1	K01703	4.2.1.33	0.0,0.0,0.0,0.0,0.0,0.0,0.0,0.0,0.0,0.0,0.0,0.0,0.0,0.0,0.0,1.0,0.0,0.0,0.0,2.0,0.0,0.0,0.0,0.0,0.0,0.0,0.0,0.0,0.0,0.0,0.0,0.0,0.0,0.0,0.0,0.0,0.0,0.0,0.0,0.0,0.0,0.0,0.0,0.0
AMPL_DICDI Cytosol aminopeptidase OS=Dictyostelium discoideum GN=lap PE=1 SV=1	K11142	3.4.11.5,3.4.11.1	0.0,0.0,0.0,0.0,0.0,0.0,1.0,0.0,0.0,0.0,0.0,0.0,0.0,0.0,0.0,0.0,0.0,0.0,0.0,0.0,0.0,0.0,0.0,0.0,0.0,0.0,0.0,0.0,0.0,0.0,0.0,0.0,0.0,0.0,0.0,0.0,0.0,0.0,0.0,0.0,0.0,0.0,0.0,0.0
MES3_ARATH Methylesterase 3 OS=Arabidopsis thaliana GN=MES3 PE=2 SV=1	K08233	3.1.1.-	0.0,0.0,0.0,0.0,0.0,0.0,0.0,0.0,0.0,0.0,0.0,0.0,0.0,0.0,0.0,0.0,0.0,0.0,0.0,0.0,0.0,1.0,0.0,0.0,0.0,0.0,0.0,0.0,0.0,0.0,0.0,0.0,0.0,0.0,0.0,0.0,0.0,0.0,0.0,0.0,0.0,0.0,0.0,0.0
RNB_SHISS Exoribonuclease 2 OS=Shigella sonnei (strain Ss046) GN=rnb PE=3 SV=1	K01147	3.1.13.1	0.0,0.0,0.0,0.0,0.0,0.0,0.0,0.0,0.0,0.0,0.0,0.0,0.0,0.0,0.0,0.0,0.0,0.0,0.0,0.0,0.0,0.0,0.0,0.0,0.0,0.0,0.0,0.0,0.0,0.0,0.0,0.0,0.0,0.0,0.0,0.0,0.0,0.0,0.0,0.0,0.0,0.0,3.0,0.0
MG: Apoptosis-inducing factor 1, mitochondrial OS=Dictyostelium discoideum GN=aif PE=2 SV=1 [Q9GRX6] Score: 63.2	K04727	1.1.1.-	0.0,0.0,0.0,0.0,0.0,0.0,0.0,0.0,0.0,0.0,0.0,0.0,0.0,0.0,0.0,0.0,0.0,0.0,0.0,0.0,0.0,0.0,0.0,0.0,0.0,0.0,1.0,0.0,0.0,0.0,0.0,0.0,0.0,0.0,0.0,0.0,0.0,0.0,0.0,0.0,0.0,0.0,0.0,0.0
MG: Uncharacterized ABC transporter permease protein YufP OS=Bacillus subtilis (strain 168) GN=yufP PE=3 SV=1 [O05254] Score: 199.0	K02057	UNKNOWN	0.0,0.0,0.0,0.0,0.0,0.0,0.0,0.0,0.0,1.0,0.0,0.0,1.0,0.0,1.0,0.0,0.0,0.0,0.0,2.0,0.0,0.0,0.0,0.0,0.0,2.0,0.0,0.0,1.0,0.0,1.0,0.0,0.0,0.0,0.0,0.0,0.0,0.0,1.0,0.0,0.0,0.0,0.0,0.0
MG: Transcriptional regulator MraZ OS=Clostridium phytofermentans (strain ATCC 700394 / DSM 18823 / ISDg) GN=mraZ PE=3 SV=1 [A9KM87] Score: 64.7	K03925	UNKNOWN	0.0,0.0,0.0,0.0,0.0,0.0,0.0,0.0,0.0,0.0,0.0,0.0,0.0,0.0,0.0,0.0,0.0,0.0,0.0,0.0,0.0,0.0,0.0,0.0,1.0,0.0,0.0,0.0,0.0,0.0,0.0,0.0,0.0,0.0,0.0,0.0,0.0,0.0,0.0,0.0,0.0,0.0,0.0,0.0
MG: Phosphate acyltransferase OS=Clostridium thermocellum (strain ATCC 27405 / DSM 1237 / NBRC 103400 / NCIMB 10682 / NRRL B-4536 / VPI 7372) GN=plsX PE=3 SV=1 [A3DDZ2] Score: 345.0	K03621	2.3.1.n2	0.0,0.0,0.0,0.0,0.0,0.0,0.0,0.0,0.0,0.0,0.0,0.0,0.0,0.0,0.0,0.0,0.0,0.0,0.0,4.0,0.0,0.0,0.0,0.0,0.0,0.0,0.0,0.0,0.0,0.0,0.0,0.0,0.0,0.0,0.0,0.0,0.0,0.0,0.0,0.0,0.0,0.0,0.0,0.0
MG: Flagellar L-ring protein OS=Desulfotalea psychrophila (strain LSv54 / DSM 12343) GN=flgH PE=3 SV=1 [Q6AJR8] Score: 107.0	K02393	UNKNOWN	0.0,0.0,0.0,0.0,0.0,0.0,0.0,0.0,0.0,0.0,0.0,0.0,15.0,14.0,13.0,18.0,20.0,8.0,0.0,20.0,0.0,0.0,0.0,0.0,0.0,0.0,0.0,0.0,0.0,0.0,0.0,0.0,0.0,0.0,0.0,0.0,0.0,0.0,0.0,0.0,0.0,0.0,0.0,0.0
RNH3_STAA3 Ribonuclease HIII OS=Staphylococcus aureus (strain USA300) GN=rnhC PE=3 SV=1	K03471	3.1.26.4	0.0,0.0,0.0,0.0,0.0,0.0,0.0,0.0,0.0,1.0,0.0,0.0,0.0,0.0,0.0,0.0,0.0,0.0,0.0,0.0,0.0,0.0,0.0,0.0,0.0,0.0,0.0,0.0,0.0,0.0,0.0,0.0,0.0,0.0,0.0,0.0,0.0,0.0,0.0,0.0,0.0,0.0,0.0,0.0
MG: Trehalose/maltose import ATP-binding protein MalK OS=Thermococcus litoralis (strain ATCC 51850 / DSM 5473 / JCM 8560 / NS-C) GN=malK PE=1 SV=1 [Q9YGA6] Score: 422.0	K10112	3.6.3.19	253.0,234.0,261.0,189.0,258.0,341.0,360.0,398.0,268.0,329.0,318.0,369.0,699.0,627.0,680.0,479.0,630.0,577.0,502.0,581.0,331.0,371.0,341.0,353.0,342.0,330.0,330.0,300.0,265.0,298.0,213.0,215.0,271.0,115.0,272.0,306.0,292.0,330.0,173.0,149.0,14.0,149.0,66.0,114.0
GPH_RHOS5 Phosphoglycolate phosphatase OS=Rhodobacter sphaeroides (strain ATCC 17025 / ATH 2.4.3) GN=cbbZ PE=3 SV=1	K01091	3.1.3.18	0.0,0.0,0.0,0.0,0.0,0.0,0.0,0.0,0.0,0.0,0.0,0.0,0.0,0.0,0.0,0.0,0.0,0.0,0.0,0.0,0.0,0.0,0.0,0.0,1.0,0.0,0.0,0.0,0.0,0.0,0.0,0.0,0.0,0.0,0.0,0.0,0.0,0.0,0.0,0.0,0.0,0.0,0.0,0.0
MG: Gamma-glutamyltranspeptidase OS=Escherichia coli (strain K12) GN=ggt PE=1 SV=1 [P18956] Score: 368.0	K00681	2.3.2.2,3.4.19.13	12.0,8.0,4.0,6.0,15.0,1.0,25.0,7.0,4.0,1.0,13.0,14.0,11.0,6.0,5.0,4.0,14.0,7.0,3.0,4.0,7.0,8.0,5.0,5.0,5.0,5.0,2.0,1.0,4.0,2.0,6.0,6.0,2.0,0.0,6.0,5.0,6.0,2.0,2.0,1.0,1.0,2.0,0.0,1.0
CP21A_ARATH Peptidyl-prolyl cis-trans isomerase CYP21-1 OS=Arabidopsis thaliana GN=CYP21-1 PE=2 SV=1	UNKNOWN	5.2.1.8	0.0,0.0,0.0,0.0,0.0,0.0,0.0,0.0,0.0,0.0,0.0,0.0,0.0,0.0,0.0,0.0,0.0,0.0,0.0,0.0,0.0,0.0,0.0,0.0,0.0,0.0,0.0,0.0,0.0,0.0,0.0,0.0,1.0,1.0,0.0,1.0,0.0,0.0,0.0,0.0,0.0,0.0,0.0,0.0
MG: Probable glucitol transport protein GutA OS=Bacillus subtilis (strain 168) GN=gutA PE=3 SV=1 [O34368] Score: 135.0	K16248	UNKNOWN	1.0,0.0,0.0,0.0,2.0,4.0,9.0,2.0,0.0,0.0,0.0,0.0,0.0,0.0,0.0,0.0,0.0,0.0,0.0,0.0,0.0,1.0,0.0,0.0,0.0,0.0,0.0,0.0,0.0,0.0,0.0,0.0,0.0,0.0,0.0,1.0,6.0,5.0,0.0,0.0,0.0,6.0,0.0,0.0
MG: UPF0053 protein Mb2387c OS=Mycobacterium bovis (strain ATCC BAA-935 / AF2122/97) GN=Mb2387c PE=3 SV=1 [P67131] Score: 162.0	UNKNOWN	UNKNOWN	0.0,0.0,0.0,0.0,0.0,0.0,0.0,0.0,0.0,0.0,0.0,0.0,0.0,0.0,0.0,0.0,0.0,0.0,0.0,1.0,0.0,0.0,0.0,0.0,0.0,0.0,0.0,0.0,0.0,0.0,0.0,0.0,0.0,0.0,0.0,0.0,0.0,0.0,0.0,0.0,0.0,0.0,0.0,0.0
MG: Serine--tRNA ligase 1 OS=Enterococcus faecalis (strain ATCC 700802 / V583) GN=serS1 PE=3 SV=1 [Q839Q8] Score: 532.0	K01875	6.1.1.11	0.0,0.0,0.0,0.0,0.0,0.0,0.0,0.0,0.0,0.0,0.0,0.0,2.0,0.0,0.0,0.0,0.0,0.0,0.0,0.0,0.0,0.0,0.0,0.0,0.0,0.0,0.0,0.0,0.0,0.0,0.0,0.0,0.0,0.0,0.0,0.0,0.0,0.0,0.0,0.0,0.0,0.0,0.0,0.0
RL18_CLOTE 50S ribosomal protein L18 OS=Clostridium tetani (strain Massachusetts / E88) GN=rplR PE=3 SV=1	K02881	UNKNOWN	0.0,1.0,5.0,2.0,0.0,0.0,0.0,0.0,0.0,0.0,0.0,0.0,0.0,0.0,0.0,0.0,0.0,0.0,0.0,0.0,0.0,0.0,0.0,0.0,0.0,0.0,0.0,0.0,0.0,0.0,0.0,0.0,0.0,0.0,0.0,0.0,0.0,0.0,0.0,0.0,0.0,0.0,0.0,0.0
MG: Cytidine deaminase OS=Sporosarcina psychrophila GN=cdd PE=3 SV=1 [Q9S3M0] Score: 178.0	UNKNOWN	3.5.4.5	3.0,2.0,2.0,0.0,0.0,0.0,0.0,0.0,1.0,8.0,3.0,5.0,3.0,4.0,4.0,6.0,6.0,5.0,3.0,8.0,0.0,0.0,0.0,0.0,0.0,0.0,0.0,0.0,0.0,0.0,0.0,0.0,0.0,0.0,0.0,0.0,0.0,0.0,0.0,2.0,0.0,0.0,0.0,0.0
KRA71_SHEEP Keratin-associated protein 7-1 OS=Ovis aries GN=KRTAP7-1 PE=2 SV=1	UNKNOWN	UNKNOWN	0.0,0.0,0.0,0.0,0.0,0.0,0.0,0.0,0.0,0.0,0.0,0.0,0.0,0.0,0.0,0.0,0.0,0.0,0.0,0.0,0.0,0.0,0.0,0.0,0.0,0.0,0.0,4.0,0.0,0.0,0.0,0.0,0.0,0.0,0.0,0.0,0.0,0.0,0.0,0.0,0.0,0.0,0.0,0.0
MG: Phosphoribosylaminoimidazole-succinocarboxamide synthase OS=Methanosarcina barkeri (strain Fusaro / DSM 804) GN=purC PE=3 SV=1 [Q46F30] Score: 446.0	K01923	6.3.2.6	0.0,0.0,0.0,0.0,0.0,0.0,1.0,0.0,0.0,0.0,0.0,0.0,10.0,9.0,34.0,17.0,6.0,16.0,11.0,20.0,0.0,0.0,0.0,0.0,0.0,0.0,0.0,0.0,0.0,0.0,0.0,0.0,0.0,0.0,0.0,0.0,0.0,0.0,1.0,0.0,0.0,0.0,0.0,0.0
ACRB_NEOFI Probable ubiquitination network signaling protein acrB OS=Neosartorya fischeri (strain ATCC 1020 / DSM 3700 / FGSC A1164 / NRRL 181) GN=acrB PE=3 SV=1	UNKNOWN	UNKNOWN	0.0,0.0,0.0,0.0,0.0,0.0,0.0,0.0,0.0,0.0,0.0,0.0,0.0,0.0,0.0,0.0,0.0,0.0,0.0,0.0,0.0,0.0,0.0,0.0,0.0,0.0,0.0,0.0,0.0,0.0,0.0,0.0,0.0,0.0,0.0,0.0,0.0,0.0,0.0,0.0,0.0,0.0,0.0,1.0
MYL9_BOVIN Myosin regulatory light polypeptide 9 OS=Bos taurus GN=MYL9 PE=2 SV=3	K12757	UNKNOWN	0.0,0.0,0.0,0.0,0.0,0.0,0.0,0.0,0.0,0.0,2.0,0.0,0.0,0.0,0.0,0.0,0.0,0.0,0.0,0.0,0.0,0.0,0.0,0.0,0.0,0.0,0.0,0.0,0.0,0.0,0.0,0.0,0.0,0.0,0.0,0.0,0.0,0.0,0.0,0.0,0.0,0.0,0.0,0.0
GCSP_PSYIN Glycine dehydrogenase (decarboxylating) OS=Psychromonas ingrahamii (strain 37) GN=gcvP PE=3 SV=1	K00281	1.4.4.2	0.0,0.0,0.0,0.0,0.0,0.0,0.0,0.0,0.0,1.0,0.0,0.0,0.0,0.0,0.0,0.0,0.0,0.0,0.0,0.0,0.0,0.0,0.0,0.0,0.0,0.0,0.0,0.0,0.0,0.0,0.0,0.0,0.0,0.0,0.0,0.0,0.0,0.0,0.0,0.0,0.0,0.0,0.0,0.0
MG: FAD:protein FMN transferase OS=Treponema pallidum (strain Nichols) GN=apbE PE=1 SV=1 [O83774] Score: 207.0	K03734	2.7.1.180	1.0,0.0,0.0,0.0,0.0,0.0,0.0,0.0,0.0,0.0,6.0,0.0,7.0,1.0,1.0,1.0,2.0,3.0,0.0,0.0,0.0,0.0,0.0,0.0,0.0,0.0,0.0,0.0,0.0,0.0,0.0,0.0,1.0,0.0,0.0,0.0,0.0,0.0,0.0,0.0,0.0,0.0,0.0,1.0
MG: Ornithine carbamoyltransferase, catabolic OS=Bacillus licheniformis (strain ATCC 14580 / DSM 13 / JCM 2505 / NBRC 12200 / NCIMB 9375 / NRRL NRS-1264 / Gibson 46) GN=arcB PE=3 SV=1 [O86132] Score: 444.0	K00611	2.1.3.3	0.0,0.0,0.0,0.0,0.0,0.0,0.0,0.0,0.0,0.0,0.0,0.0,8.0,8.0,11.0,2.0,12.0,10.0,4.0,0.0,2.0,5.0,5.0,14.0,0.0,0.0,1.0,1.0,0.0,0.0,0.0,1.0,0.0,0.0,0.0,2.0,1.0,0.0,0.0,0.0,0.0,0.0,1.0,0.0
IMDH_BORBU Inosine-5-monophosphate dehydrogenase OS=Borrelia burgdorferi (strain ATCC 35210 / B31 / CIP 102532 / DSM 4680) GN=guaB PE=1 SV=1	K00088	1.1.1.205	0.0,0.0,5.0,5.0,10.0,8.0,8.0,8.0,0.0,0.0,0.0,1.0,14.0,9.0,6.0,2.0,11.0,9.0,0.0,7.0,0.0,0.0,0.0,0.0,0.0,0.0,0.0,0.0,0.0,2.0,0.0,3.0,1.0,0.0,5.0,0.0,3.0,0.0,2.0,3.0,1.0,0.0,4.0,4.0
MG: S-layer protein sap OS=Bacillus anthracis GN=sap PE=1 SV=1 [P49051] Score: 54.7	UNKNOWN	UNKNOWN	6.0,4.0,3.0,1.0,1.0,20.0,12.0,81.0,0.0,6.0,11.0,3.0,0.0,4.0,0.0,0.0,0.0,0.0,0.0,0.0,18.0,76.0,7.0,19.0,0.0,0.0,0.0,0.0,0.0,166.0,1.0,5.0,9.0,6.0,0.0,3.0,28.0,16.0,29.0,49.0,0.0,0.0,29.0,43.0
MG: TVP38/TMEM64 family membrane protein YdjX OS=Escherichia coli (strain K12) GN=ydjX PE=3 SV=2 [P76219] Score: 57.4	UNKNOWN	UNKNOWN	0.0,0.0,0.0,0.0,0.0,0.0,0.0,0.0,0.0,0.0,0.0,0.0,0.0,0.0,0.0,0.0,0.0,0.0,0.0,0.0,0.0,0.0,0.0,0.0,0.0,0.0,0.0,0.0,0.0,0.0,0.0,0.0,0.0,0.0,0.0,0.0,0.0,1.0,0.0,0.0,0.0,0.0,0.0,0.0
MG: Response regulator rcp1 OS=Synechocystis sp. (strain PCC 6803 / Kazusa) GN=rcp1 PE=1 SV=1 [Q55169] Score: 153.0	K11355	UNKNOWN	0.0,0.0,0.0,0.0,0.0,2.0,0.0,0.0,2.0,0.0,0.0,0.0,0.0,0.0,0.0,0.0,0.0,0.0,0.0,0.0,0.0,0.0,0.0,0.0,0.0,0.0,0.0,0.0,0.0,0.0,0.0,0.0,0.0,0.0,0.0,0.0,0.0,0.0,0.0,0.0,0.0,0.0,0.0,0.0
MG: UvrABC system protein A (Fragment) OS=Vitreoscilla stercoraria GN=uvrA PE=3 SV=1 [Q08518] Score: 599.0	UNKNOWN	UNKNOWN	0.0,0.0,0.0,0.0,0.0,0.0,0.0,0.0,0.0,0.0,0.0,0.0,0.0,0.0,0.0,0.0,0.0,0.0,0.0,0.0,1.0,0.0,0.0,0.0,0.0,0.0,0.0,0.0,0.0,0.0,0.0,0.0,0.0,0.0,0.0,0.0,0.0,0.0,0.0,0.0,0.0,0.0,0.0,0.0
MG: Uncharacterized transporter MJ1031 OS=Methanocaldococcus jannaschii (strain ATCC 43067 / DSM 2661 / JAL-1 / JCM 10045 / NBRC 100440) GN=MJ1031 PE=3 SV=1 [Q58437] Score: 59.3	K07088	UNKNOWN	0.0,0.0,0.0,0.0,1.0,0.0,0.0,0.0,0.0,0.0,0.0,0.0,0.0,0.0,0.0,0.0,0.0,0.0,1.0,0.0,0.0,0.0,0.0,0.0,0.0,0.0,0.0,0.0,0.0,0.0,0.0,0.0,0.0,0.0,0.0,0.0,0.0,0.0,0.0,0.0,0.0,0.0,0.0,0.0
NUOD_NOCSJ NADH-quinone oxidoreductase subunit D OS=Nocardioides sp. (strain BAA-499 / JS614) GN=nuoD PE=3 SV=1	K00333	1.6.5.11	0.0,0.0,0.0,0.0,0.0,0.0,0.0,0.0,0.0,0.0,0.0,0.0,0.0,0.0,0.0,0.0,0.0,0.0,0.0,0.0,0.0,0.0,0.0,1.0,0.0,0.0,0.0,0.0,0.0,0.0,0.0,0.0,0.0,0.0,0.0,0.0,0.0,0.0,0.0,0.0,0.0,0.0,0.0,0.0
MG: Superoxide dismutase [Fe] OS=Legionella pneumophila subsp. pneumophila (strain Philadelphia 1 / ATCC 33152 / DSM 7513) GN=sodB PE=3 SV=1 [P31108] Score: 237.0	K04564	1.15.1.1	4.0,3.0,4.0,2.0,9.0,27.0,65.0,38.0,20.0,8.0,15.0,26.0,0.0,0.0,0.0,0.0,0.0,0.0,0.0,0.0,9.0,8.0,2.0,12.0,0.0,0.0,0.0,0.0,9.0,6.0,3.0,5.0,1.0,2.0,7.0,1.0,0.0,0.0,1.0,16.0,0.0,4.0,0.0,1.0
MG: Uncharacterized transporter MJ0709 OS=Methanocaldococcus jannaschii (strain ATCC 43067 / DSM 2661 / JAL-1 / JCM 10045 / NBRC 100440) GN=MJ0709 PE=3 SV=1 [Q58119] Score: 105.0	UNKNOWN	UNKNOWN	0.0,0.0,0.0,0.0,0.0,0.0,0.0,0.0,0.0,0.0,0.0,0.0,0.0,0.0,0.0,0.0,0.0,1.0,0.0,1.0,0.0,0.0,0.0,0.0,0.0,0.0,0.0,0.0,1.0,0.0,0.0,0.0,1.0,0.0,0.0,0.0,0.0,0.0,0.0,0.0,0.0,0.0,0.0,0.0
CYSKP_ARATH Cysteine synthase, chloroplastic/chromoplastic OS=Arabidopsis thaliana GN=OASB PE=1 SV=2	K01738	2.5.1.47	1.0,0.0,0.0,1.0,2.0,1.0,0.0,0.0,1.0,2.0,2.0,2.0,0.0,0.0,0.0,0.0,0.0,1.0,0.0,0.0,1.0,2.0,0.0,0.0,0.0,0.0,0.0,0.0,0.0,0.0,0.0,0.0,2.0,2.0,0.0,2.0,3.0,3.0,0.0,0.0,0.0,0.0,0.0,0.0
MG: NADP-dependent malic enzyme OS=Haemophilus influenzae (strain ATCC 51907 / DSM 11121 / KW20 / Rd) GN=maeB PE=3 SV=1 [P43837] Score: 657.0	K00029	1.1.1.40	0.0,0.0,0.0,0.0,0.0,0.0,0.0,0.0,0.0,0.0,0.0,0.0,0.0,0.0,0.0,0.0,0.0,0.0,0.0,0.0,3.0,2.0,34.0,44.0,0.0,0.0,0.0,0.0,5.0,0.0,1.0,0.0,0.0,0.0,0.0,0.0,0.0,1.0,0.0,0.0,0.0,0.0,0.0,0.0
MG: Isochorismatase domain-containing protein 2, mitochondrial OS=Danio rerio GN=isoc2 PE=2 SV=1 [A0JME6] Score: 128.0	UNKNOWN	UNKNOWN	0.0,0.0,0.0,0.0,0.0,0.0,0.0,0.0,0.0,0.0,0.0,0.0,0.0,0.0,0.0,0.0,0.0,0.0,0.0,0.0,0.0,0.0,0.0,0.0,0.0,1.0,0.0,0.0,0.0,0.0,0.0,0.0,0.0,0.0,2.0,0.0,0.0,0.0,0.0,0.0,0.0,0.0,0.0,0.0
HSCB_PSEPK Co-chaperone protein HscB homolog OS=Pseudomonas putida (strain KT2440) GN=hscB PE=3 SV=1	K04082	UNKNOWN	0.0,0.0,0.0,0.0,0.0,0.0,0.0,0.0,0.0,0.0,0.0,0.0,0.0,0.0,0.0,1.0,0.0,0.0,0.0,0.0,0.0,0.0,0.0,0.0,0.0,0.0,0.0,0.0,0.0,0.0,0.0,0.0,0.0,0.0,0.0,0.0,0.0,0.0,0.0,0.0,0.0,0.0,0.0,0.0
MG: Maltodextrin phosphorylase OS=Thermococcus litoralis (strain ATCC 51850 / DSM 5473 / JCM 8560 / NS-C) GN=malP PE=1 SV=1 [Q9YGA7] Score: 596.0	K00688	2.4.1.1	3.0,1.0,1.0,0.0,0.0,7.0,8.0,12.0,6.0,4.0,4.0,4.0,442.0,386.0,550.0,435.0,301.0,305.0,335.0,356.0,0.0,0.0,0.0,0.0,2.0,0.0,2.0,3.0,1.0,0.0,0.0,0.0,7.0,8.0,5.0,16.0,1.0,1.0,0.0,0.0,0.0,2.0,0.0,3.0
MG: Putative gluconeogenesis factor OS=Synechocystis sp. (strain PCC 6803 / Kazusa) GN=sll0154 PE=3 SV=1 [Q55575] Score: 322.0	UNKNOWN	UNKNOWN	1.0,0.0,0.0,1.0,0.0,0.0,0.0,0.0,0.0,0.0,0.0,0.0,0.0,0.0,0.0,0.0,0.0,0.0,0.0,0.0,1.0,0.0,0.0,0.0,0.0,0.0,0.0,0.0,0.0,2.0,0.0,0.0,0.0,0.0,0.0,0.0,0.0,0.0,0.0,0.0,0.0,0.0,0.0,0.0
MG: Ribosomal RNA small subunit methyltransferase A OS=Clostridium botulinum (strain 657 / Type Ba4) GN=rsmA PE=3 SV=1 [C3KXY4] Score: 181.0	K02528	2.1.1.182	0.0,0.0,0.0,0.0,0.0,1.0,0.0,0.0,0.0,0.0,0.0,0.0,0.0,0.0,0.0,0.0,0.0,0.0,0.0,0.0,0.0,0.0,0.0,0.0,0.0,0.0,0.0,0.0,0.0,0.0,0.0,0.0,0.0,0.0,0.0,0.0,0.0,0.0,0.0,0.0,0.0,0.0,0.0,0.0
MG: Putative deoxyribose-phosphate aldolase OS=Caenorhabditis elegans GN=F09E5.3 PE=3 SV=1 [Q19264] Score: 178.0	K01619	4.1.2.4	0.0,0.0,0.0,0.0,0.0,0.0,0.0,0.0,0.0,0.0,0.0,0.0,0.0,0.0,0.0,0.0,0.0,0.0,0.0,0.0,0.0,0.0,0.0,0.0,0.0,0.0,0.0,0.0,0.0,0.0,0.0,0.0,0.0,0.0,0.0,0.0,0.0,0.0,0.0,0.0,1.0,0.0,0.0,0.0
MG: 50S ribosomal protein L19 OS=Alkaliphilus oremlandii (strain OhILAs) GN=rplS PE=3 SV=1 [A8MHC5] Score: 161.0	K02884	UNKNOWN	2.0,0.0,0.0,0.0,0.0,0.0,0.0,0.0,0.0,0.0,0.0,0.0,1.0,0.0,0.0,0.0,1.0,1.0,0.0,0.0,0.0,0.0,0.0,0.0,0.0,0.0,0.0,0.0,0.0,0.0,0.0,0.0,0.0,0.0,0.0,0.0,0.0,0.0,0.0,0.0,0.0,0.0,0.0,0.0
MG: ATP-dependent helicase/nuclease subunit A OS=Clostridium perfringens (strain ATCC 13124 / NCTC 8237 / Type A) GN=addA PE=3 SV=1 [Q0TV46] Score: 1073.0	K16898	3.1.-.-,3.6.4.12	0.0,0.0,0.0,0.0,0.0,1.0,0.0,0.0,0.0,0.0,0.0,1.0,0.0,0.0,0.0,0.0,0.0,0.0,0.0,0.0,0.0,0.0,0.0,0.0,0.0,0.0,0.0,0.0,0.0,1.0,0.0,0.0,0.0,0.0,0.0,0.0,0.0,0.0,0.0,0.0,0.0,0.0,0.0,0.0
MG: Probable tyrosine recombinase XerC-like OS=Pyrococcus furiosus (strain ATCC 43587 / DSM 3638 / JCM 8422 / Vc1) GN=PF1868 PE=3 SV=1 [Q8TZV9] Score: 86.3	K04763	UNKNOWN	0.0,0.0,0.0,0.0,0.0,0.0,0.0,0.0,0.0,0.0,0.0,0.0,2.0,0.0,0.0,0.0,0.0,0.0,0.0,0.0,0.0,0.0,0.0,0.0,0.0,0.0,0.0,0.0,0.0,0.0,0.0,0.0,0.0,0.0,0.0,0.0,0.0,0.0,0.0,0.0,0.0,0.0,1.0,0.0
ATPB_DROME ATP synthase subunit beta, mitochondrial OS=Drosophila melanogaster GN=ATPsyn-beta PE=2 SV=3	K02133	3.6.3.14	2.0,2.0,32.0,31.0,34.0,42.0,130.0,79.0,28.0,28.0,29.0,29.0,6.0,8.0,7.0,6.0,7.0,9.0,1.0,4.0,41.0,45.0,40.0,36.0,15.0,7.0,13.0,10.0,47.0,48.0,28.0,28.0,17.0,17.0,26.0,20.0,33.0,35.0,42.0,51.0,14.0,17.0,17.0,29.0
MG: Probable cysteine synthase OS=Bacillus subtilis (strain 168) GN=ytkP PE=3 SV=1 [O34476] Score: 86.3	K01738	2.5.1.47	0.0,0.0,0.0,0.0,0.0,0.0,2.0,0.0,0.0,0.0,0.0,0.0,11.0,18.0,9.0,13.0,13.0,17.0,0.0,6.0,0.0,0.0,0.0,0.0,0.0,0.0,0.0,0.0,0.0,0.0,0.0,0.0,3.0,3.0,16.0,12.0,0.0,0.0,0.0,0.0,0.0,0.0,0.0,0.0
KAD_PROAC Adenylate kinase OS=Propionibacterium acnes (strain KPA171202 / DSM 16379) GN=adk PE=3 SV=1	K00939	2.7.4.3	0.0,0.0,0.0,0.0,0.0,1.0,0.0,0.0,0.0,0.0,0.0,0.0,0.0,0.0,0.0,0.0,0.0,0.0,0.0,0.0,0.0,0.0,0.0,0.0,0.0,0.0,0.0,0.0,0.0,0.0,0.0,0.0,0.0,0.0,0.0,0.0,0.0,0.0,0.0,0.0,0.0,0.0,0.0,0.0
MG: Arginine--tRNA ligase OS=Escherichia coli (strain SE11) GN=argS PE=3 SV=1 [B6I0S7] Score: 715.0	K01887	6.1.1.19	0.0,0.0,0.0,0.0,0.0,0.0,0.0,0.0,0.0,0.0,0.0,0.0,0.0,0.0,0.0,0.0,0.0,0.0,0.0,0.0,0.0,0.0,0.0,0.0,0.0,0.0,0.0,0.0,1.0,0.0,0.0,0.0,0.0,0.0,0.0,0.0,0.0,0.0,0.0,0.0,0.0,0.0,4.0,0.0
YAKA_SCHPO Uncharacterized protein C1F7.10 OS=Schizosaccharomyces pombe (strain 972 / ATCC 24843) GN=SPAC1F7.10 PE=4 SV=1	UNKNOWN	UNKNOWN	0.0,0.0,0.0,0.0,0.0,0.0,1.0,0.0,0.0,0.0,0.0,0.0,0.0,0.0,0.0,0.0,0.0,0.0,0.0,0.0,0.0,0.0,0.0,0.0,0.0,0.0,0.0,0.0,0.0,0.0,0.0,0.0,0.0,0.0,0.0,0.0,0.0,0.0,0.0,0.0,0.0,0.0,0.0,0.0
CLPE_STRPN ATP-dependent Clp protease ATP-binding subunit ClpE OS=Streptococcus pneumoniae serotype 4 (strain ATCC BAA-334 / TIGR4) GN=clpE PE=3 SV=2	K03697	UNKNOWN	0.0,0.0,4.0,2.0,2.0,2.0,0.0,0.0,0.0,0.0,0.0,0.0,1.0,0.0,1.0,0.0,1.0,3.0,0.0,0.0,0.0,0.0,0.0,0.0,7.0,8.0,2.0,0.0,0.0,0.0,0.0,0.0,0.0,0.0,0.0,0.0,0.0,0.0,3.0,1.0,0.0,0.0,0.0,0.0
MG: Ribosomal RNA small subunit methyltransferase A OS=Clostridium acetobutylicum (strain ATCC 824 / DSM 792 / JCM 1419 / LMG 5710 / VKM B-1787) GN=rsmA PE=3 SV=1 [Q97EX0] Score: 200.0	K02528	2.1.1.182	0.0,0.0,0.0,0.0,0.0,0.0,0.0,0.0,0.0,0.0,0.0,0.0,1.0,0.0,0.0,0.0,1.0,0.0,2.0,0.0,0.0,0.0,0.0,0.0,0.0,0.0,0.0,0.0,0.0,0.0,0.0,0.0,0.0,0.0,0.0,0.0,0.0,0.0,0.0,0.0,0.0,0.0,0.0,0.0
MG: Serine protease AprX OS=Bacillus subtilis (strain 168) GN=aprX PE=1 SV=1 [O31788] Score: 265.0	K17734	3.4.21.-	0.0,0.0,0.0,0.0,1.0,0.0,0.0,0.0,0.0,0.0,0.0,0.0,0.0,0.0,1.0,1.0,0.0,0.0,1.0,0.0,4.0,1.0,0.0,0.0,0.0,0.0,0.0,0.0,0.0,2.0,0.0,0.0,0.0,0.0,0.0,0.0,0.0,0.0,0.0,0.0,0.0,0.0,0.0,0.0
MG: Adenosine deaminase OS=Helicobacter pylori (strain ATCC 700392 / 26695) GN=HP_0267 PE=1 SV=1 [O25046] Score: 90.1	UNKNOWN	3.5.4.4	0.0,0.0,0.0,0.0,0.0,0.0,0.0,0.0,0.0,0.0,0.0,0.0,0.0,0.0,0.0,0.0,0.0,0.0,0.0,0.0,0.0,0.0,0.0,0.0,0.0,0.0,0.0,0.0,0.0,0.0,0.0,0.0,0.0,0.0,0.0,0.0,0.0,0.0,0.0,1.0,0.0,0.0,0.0,0.0
MG: 30S ribosomal protein S6 OS=Corynebacterium efficiens (strain DSM 44549 / YS-314 / AJ 12310 / JCM 11189 / NBRC 100395) GN=rpsF PE=3 SV=2 [Q8FLP8] Score: 64.3	K02990	UNKNOWN	0.0,0.0,0.0,0.0,2.0,4.0,7.0,6.0,1.0,2.0,0.0,0.0,0.0,0.0,0.0,0.0,0.0,0.0,0.0,0.0,3.0,4.0,2.0,4.0,0.0,0.0,0.0,0.0,0.0,0.0,0.0,0.0,0.0,0.0,0.0,0.0,0.0,0.0,4.0,5.0,0.0,0.0,0.0,0.0
PRMA_CAMHC Ribosomal protein L11 methyltransferase OS=Campylobacter hominis (strain ATCC BAA-381 / LMG 19568 / NCTC 13146 / CH001A) GN=prmA PE=3 SV=1	K02687	2.1.1.-	0.0,0.0,0.0,0.0,0.0,0.0,0.0,0.0,0.0,0.0,0.0,0.0,0.0,0.0,0.0,0.0,0.0,0.0,0.0,0.0,0.0,0.0,0.0,0.0,0.0,0.0,0.0,0.0,0.0,0.0,0.0,0.0,0.0,0.0,0.0,0.0,0.0,0.0,0.0,0.0,0.0,1.0,0.0,0.0
MG: Phosphoglucomutase OS=Komagataeibacter xylinus GN=celB PE=3 SV=1 [P38569] Score: 658.0	UNKNOWN	5.4.2.2	0.0,0.0,2.0,1.0,0.0,0.0,0.0,0.0,0.0,0.0,0.0,0.0,0.0,1.0,6.0,0.0,0.0,0.0,0.0,0.0,0.0,0.0,0.0,0.0,0.0,0.0,0.0,0.0,0.0,0.0,0.0,0.0,0.0,0.0,0.0,1.0,0.0,0.0,0.0,0.0,0.0,0.0,0.0,0.0
RAN1_ORYSJ GTP-binding nuclear protein Ran-1 OS=Oryza sativa subsp. japonica GN=RAN1 PE=2 SV=1	K07936	UNKNOWN	0.0,0.0,0.0,0.0,0.0,0.0,0.0,0.0,0.0,0.0,0.0,0.0,0.0,0.0,0.0,0.0,0.0,0.0,0.0,0.0,0.0,0.0,0.0,0.0,0.0,0.0,0.0,0.0,0.0,0.0,0.0,0.0,0.0,0.0,0.0,0.0,0.0,0.0,0.0,0.0,0.0,0.0,0.0,1.0
ACSA_BARBK Acetyl-coenzyme A synthetase OS=Bartonella bacilliformis (strain ATCC 35685 / KC583) GN=acsA PE=3 SV=1	K01895	6.2.1.1	0.0,0.0,0.0,0.0,0.0,0.0,1.0,0.0,0.0,0.0,0.0,0.0,0.0,0.0,0.0,0.0,0.0,0.0,0.0,0.0,0.0,0.0,0.0,0.0,0.0,0.0,0.0,0.0,0.0,0.0,0.0,0.0,0.0,0.0,0.0,0.0,0.0,0.0,0.0,0.0,0.0,0.0,1.0,0.0
MG: Transcription termination/antitermination protein NusA OS=Rickettsia prowazekii (strain Madrid E) GN=nusA PE=3 SV=1 [Q9ZCZ7] Score: 228.0	K02600	UNKNOWN	0.0,0.0,0.0,0.0,0.0,3.0,6.0,2.0,1.0,2.0,3.0,1.0,0.0,0.0,0.0,0.0,0.0,0.0,0.0,0.0,0.0,0.0,0.0,0.0,0.0,0.0,0.0,0.0,0.0,0.0,0.0,0.0,0.0,0.0,0.0,0.0,0.0,0.0,0.0,0.0,0.0,0.0,0.0,0.0
MG: SPBc2 prophage-derived uncharacterized protein YopR OS=Bacillus subtilis (strain 168) GN=yopR PE=4 SV=2 [O34558] Score: 55.5	UNKNOWN	UNKNOWN	0.0,1.0,0.0,0.0,0.0,0.0,0.0,0.0,0.0,0.0,0.0,0.0,0.0,0.0,0.0,0.0,0.0,0.0,0.0,0.0,0.0,0.0,0.0,0.0,0.0,0.0,0.0,0.0,0.0,0.0,0.0,0.0,0.0,0.0,0.0,0.0,0.0,0.0,0.0,0.0,0.0,0.0,0.0,0.0
EMC1_YEAST ER membrane protein complex subunit 1 OS=Saccharomyces cerevisiae (strain ATCC 204508 / S288c) GN=EMC1 PE=1 SV=1	UNKNOWN	UNKNOWN	0.0,0.0,0.0,0.0,0.0,0.0,0.0,0.0,0.0,0.0,0.0,0.0,0.0,0.0,0.0,0.0,0.0,0.0,0.0,0.0,0.0,0.0,0.0,0.0,0.0,2.0,2.0,1.0,0.0,0.0,0.0,0.0,0.0,0.0,0.0,0.0,0.0,0.0,0.0,0.0,0.0,0.0,0.0,0.0
BRSK1_HUMAN Serine/threonine-protein kinase BRSK1 OS=Homo sapiens GN=BRSK1 PE=1 SV=2	K08796	2.7.11.1,2.7.11.26	0.0,0.0,0.0,0.0,0.0,0.0,0.0,0.0,0.0,0.0,0.0,0.0,0.0,0.0,0.0,0.0,0.0,0.0,0.0,0.0,1.0,0.0,0.0,0.0,0.0,0.0,0.0,0.0,0.0,0.0,0.0,0.0,0.0,0.0,0.0,0.0,0.0,0.0,0.0,0.0,0.0,0.0,0.0,0.0
RLMN_THET8 no description	K06941	2.1.1.192	1.0,0.0,0.0,0.0,0.0,0.0,0.0,0.0,0.0,0.0,0.0,0.0,0.0,0.0,0.0,0.0,0.0,0.0,0.0,0.0,0.0,0.0,0.0,0.0,0.0,0.0,0.0,0.0,0.0,0.0,0.0,0.0,0.0,0.0,2.0,0.0,0.0,0.0,0.0,0.0,0.0,0.0,0.0,0.0
NSRP1_DANRE Nuclear speckle splicing regulatory protein 1 OS=Danio rerio GN=nsrp1 PE=1 SV=2	UNKNOWN	UNKNOWN	0.0,0.0,0.0,0.0,0.0,1.0,0.0,0.0,0.0,0.0,0.0,0.0,0.0,0.0,0.0,0.0,0.0,0.0,0.0,0.0,0.0,0.0,0.0,0.0,0.0,0.0,0.0,0.0,0.0,0.0,0.0,0.0,0.0,0.0,0.0,0.0,0.0,0.0,0.0,0.0,0.0,0.0,0.0,0.0
CHS6_USTMA no description	UNKNOWN	2.4.1.16	0.0,0.0,0.0,0.0,0.0,0.0,0.0,0.0,0.0,0.0,0.0,0.0,17.0,2.0,2.0,7.0,1.0,0.0,1.0,0.0,0.0,0.0,0.0,1.0,1.0,2.0,3.0,1.0,0.0,0.0,0.0,1.0,0.0,0.0,0.0,1.0,1.0,1.0,0.0,0.0,0.0,0.0,0.0,0.0
RS281_ARATH 40S ribosomal protein S28-1 OS=Arabidopsis thaliana GN=RPS28A PE=3 SV=1	K02979	UNKNOWN	0.0,0.0,0.0,0.0,0.0,0.0,0.0,0.0,0.0,0.0,0.0,0.0,0.0,0.0,0.0,0.0,0.0,0.0,0.0,0.0,1.0,0.0,0.0,0.0,0.0,0.0,0.0,0.0,0.0,0.0,0.0,0.0,0.0,0.0,0.0,0.0,0.0,0.0,1.0,0.0,0.0,0.0,0.0,1.0
MG: NAD-dependent protein deacetylase OS=Clostridium acetobutylicum (strain ATCC 824 / DSM 792 / JCM 1419 / LMG 5710 / VKM B-1787) GN=cobB PE=3 SV=1 [Q97MB4] Score: 259.0	K12410	3.5.1.-	0.0,1.0,0.0,0.0,0.0,0.0,0.0,0.0,0.0,0.0,0.0,0.0,0.0,0.0,0.0,0.0,0.0,0.0,0.0,0.0,0.0,2.0,0.0,0.0,0.0,0.0,0.0,0.0,0.0,0.0,0.0,0.0,0.0,0.0,0.0,0.0,0.0,0.0,0.0,0.0,0.0,0.0,0.0,0.0
K1211_HUMAN Uncharacterized protein KIAA1211 OS=Homo sapiens GN=KIAA1211 PE=1 SV=3	UNKNOWN	UNKNOWN	0.0,0.0,0.0,0.0,0.0,0.0,0.0,0.0,0.0,0.0,0.0,0.0,0.0,0.0,0.0,0.0,0.0,0.0,0.0,0.0,0.0,0.0,0.0,0.0,0.0,1.0,0.0,0.0,0.0,0.0,0.0,0.0,0.0,0.0,0.0,0.0,0.0,0.0,0.0,0.0,0.0,0.0,0.0,0.0
TRP4_ARATH Telomere repeat-binding protein 4 OS=Arabidopsis thaliana GN=TRP4 PE=1 SV=1	UNKNOWN	UNKNOWN	0.0,0.0,0.0,0.0,0.0,0.0,0.0,0.0,0.0,0.0,0.0,0.0,0.0,0.0,0.0,0.0,0.0,0.0,0.0,0.0,0.0,0.0,0.0,1.0,0.0,0.0,0.0,0.0,0.0,0.0,0.0,0.0,0.0,0.0,0.0,0.0,0.0,0.0,0.0,0.0,0.0,0.0,0.0,0.0
MG: F(420)H(2) dehydrogenase subunit I OS=Methanosarcina mazei (strain ATCC BAA-159 / DSM 3647 / Goe1 / Go1 / JCM 11833 / OCM 88) GN=fpoI PE=1 SV=1 [Q8PU60] Score: 83.2	K00338	1.12.98.3	0.0,0.0,0.0,0.0,0.0,0.0,0.0,0.0,0.0,0.0,0.0,0.0,0.0,0.0,0.0,0.0,0.0,0.0,0.0,0.0,1.0,0.0,0.0,0.0,0.0,0.0,0.0,0.0,0.0,0.0,0.0,0.0,0.0,0.0,0.0,0.0,0.0,0.0,0.0,0.0,0.0,0.0,0.0,0.0
MG: DNA-directed RNA polymerase subunit omega OS=Petrotoga mobilis (strain DSM 10674 / SJ95) GN=rpoZ PE=3 SV=1 [A9BEX2] Score: 89.4	K03060	2.7.7.6	0.0,0.0,0.0,0.0,0.0,0.0,0.0,0.0,0.0,0.0,0.0,0.0,1.0,0.0,0.0,0.0,1.0,0.0,0.0,0.0,0.0,0.0,0.0,0.0,0.0,0.0,0.0,0.0,0.0,0.0,0.0,0.0,0.0,0.0,0.0,0.0,0.0,0.0,0.0,0.0,0.0,0.0,0.0,0.0
MG: Platelet-activating factor acetylhydrolase IB subunit beta OS=Mus musculus GN=Pafah1b2 PE=1 SV=2 [Q61206] Score: 116.0	K16795	3.1.1.47	0.0,0.0,0.0,0.0,0.0,0.0,0.0,0.0,0.0,0.0,0.0,0.0,0.0,0.0,0.0,0.0,0.0,0.0,0.0,0.0,2.0,0.0,0.0,0.0,0.0,0.0,0.0,0.0,0.0,0.0,0.0,0.0,0.0,0.0,0.0,0.0,0.0,0.0,1.0,0.0,0.0,0.0,0.0,0.0
KDSB_HELPJ 3-deoxy-manno-octulosonate cytidylyltransferase OS=Helicobacter pylori (strain J99 / ATCC 700824) GN=kdsB PE=3 SV=1	K00979	2.7.7.38	0.0,0.0,0.0,0.0,0.0,0.0,0.0,0.0,0.0,0.0,0.0,0.0,0.0,0.0,0.0,0.0,1.0,0.0,0.0,0.0,0.0,0.0,0.0,0.0,0.0,0.0,0.0,0.0,0.0,0.0,0.0,0.0,0.0,0.0,0.0,0.0,0.0,0.0,0.0,0.0,0.0,0.0,0.0,0.0
MG: F420-non-reducing hydrogenase vhu iron-sulfur subunit D OS=Methanocaldococcus jannaschii (strain ATCC 43067 / DSM 2661 / JAL-1 / JCM 10045 / NBRC 100440) GN=vhuD PE=3 SV=3 [P81334] Score: 98.2	UNKNOWN	1.12.99.-	0.0,0.0,0.0,0.0,0.0,0.0,0.0,0.0,0.0,0.0,0.0,0.0,0.0,0.0,0.0,0.0,1.0,0.0,0.0,0.0,0.0,0.0,0.0,0.0,0.0,0.0,0.0,0.0,0.0,0.0,0.0,0.0,0.0,0.0,0.0,0.0,0.0,0.0,0.0,0.0,0.0,0.0,0.0,0.0
MG: 2,3-bisphosphoglycerate-independent phosphoglycerate mutase OS=Staphylococcus aureus (strain MRSA252) GN=gpmI PE=3 SV=1 [Q6GIL5] Score: 533.0	K15633	5.4.2.12	0.0,0.0,0.0,0.0,0.0,0.0,0.0,0.0,0.0,0.0,0.0,0.0,7.0,4.0,5.0,3.0,2.0,0.0,0.0,1.0,0.0,0.0,1.0,0.0,0.0,0.0,0.0,0.0,0.0,0.0,0.0,0.0,0.0,0.0,0.0,0.0,0.0,0.0,0.0,0.0,0.0,0.0,0.0,0.0
RL29_PELCD 50S ribosomal protein L29 OS=Pelobacter carbinolicus (strain DSM 2380 / Gra Bd 1) GN=rpmC PE=3 SV=1	K02904	UNKNOWN	0.0,0.0,0.0,0.0,0.0,0.0,0.0,0.0,0.0,0.0,0.0,0.0,0.0,0.0,0.0,0.0,0.0,0.0,0.0,0.0,1.0,2.0,0.0,0.0,0.0,0.0,0.0,0.0,0.0,0.0,0.0,0.0,0.0,0.0,0.0,0.0,0.0,0.0,0.0,0.0,0.0,0.0,0.0,0.0
MG: Tail sheath protein OS=Clostridium phage phiCD119 (strain Clostridium difficile/United States/Govind/2006) GN=xkdK PE=3 SV=1 [Q24LI4] Score: 172.0	UNKNOWN	UNKNOWN	0.0,0.0,0.0,0.0,0.0,0.0,0.0,0.0,0.0,0.0,0.0,0.0,57.0,11.0,29.0,27.0,9.0,6.0,16.0,11.0,0.0,0.0,0.0,0.0,0.0,0.0,0.0,0.0,0.0,0.0,0.0,0.0,0.0,0.0,0.0,0.0,0.0,0.0,0.0,0.0,0.0,0.0,0.0,0.0
SYC_SODGM Cysteine--tRNA ligase OS=Sodalis glossinidius (strain morsitans) GN=cysS PE=3 SV=1	K01883	6.1.1.16	0.0,0.0,0.0,0.0,0.0,0.0,1.0,0.0,0.0,0.0,0.0,0.0,0.0,0.0,0.0,0.0,0.0,0.0,0.0,4.0,0.0,2.0,0.0,0.0,0.0,0.0,0.0,0.0,0.0,0.0,0.0,0.0,0.0,0.0,0.0,0.0,0.0,0.0,1.0,0.0,0.0,0.0,0.0,0.0
MG: Multi-drug resistance efflux pump PmrA OS=Streptococcus pneumoniae serotype 4 (strain ATCC BAA-334 / TIGR4) GN=pmrA PE=3 SV=1 [P0A4K4] Score: 54.7	UNKNOWN	UNKNOWN	0.0,0.0,0.0,0.0,1.0,0.0,0.0,0.0,0.0,0.0,0.0,0.0,0.0,0.0,0.0,0.0,0.0,0.0,0.0,0.0,0.0,0.0,0.0,0.0,0.0,0.0,1.0,0.0,0.0,0.0,1.0,0.0,0.0,0.0,0.0,0.0,0.0,0.0,0.0,0.0,0.0,0.0,0.0,0.0
MG: Leukotriene A-4 hydrolase homolog OS=Oryza sativa subsp. japonica GN=LKHA4 PE=2 SV=1 [Q84TA3] Score: 83.6	K01254	3.3.2.6	0.0,0.0,0.0,0.0,0.0,0.0,0.0,0.0,0.0,0.0,0.0,0.0,0.0,0.0,0.0,0.0,0.0,0.0,0.0,0.0,0.0,0.0,0.0,0.0,0.0,0.0,0.0,0.0,0.0,0.0,0.0,0.0,0.0,0.0,0.0,1.0,0.0,0.0,0.0,0.0,0.0,0.0,0.0,0.0
MG: Release factor glutamine methyltransferase OS=Geobacter sulfurreducens (strain ATCC 51573 / DSM 12127 / PCA) GN=prmC PE=3 SV=1 [Q748B2] Score: 205.0	K02493	2.1.1.297	1.0,0.0,0.0,0.0,0.0,0.0,0.0,0.0,0.0,0.0,0.0,0.0,0.0,0.0,0.0,0.0,0.0,0.0,0.0,0.0,0.0,0.0,0.0,0.0,0.0,0.0,1.0,1.0,0.0,0.0,0.0,0.0,0.0,0.0,0.0,0.0,0.0,0.0,0.0,1.0,0.0,0.0,0.0,0.0
MG: 4-hydroxybenzoate octaprenyltransferase OS=Vibrio campbellii (strain ATCC BAA-1116 / BB120) GN=ubiA PE=3 SV=1 [A7N0X0] Score: 87.4	K03179	2.5.1.-	0.0,0.0,0.0,0.0,0.0,0.0,0.0,0.0,0.0,0.0,0.0,0.0,0.0,0.0,0.0,0.0,0.0,0.0,0.0,0.0,0.0,0.0,0.0,0.0,0.0,0.0,0.0,0.0,0.0,0.0,0.0,0.0,1.0,0.0,0.0,0.0,0.0,0.0,0.0,0.0,0.0,0.0,0.0,0.0
Y207_AERPE UPF0148 protein APE_0207 OS=Aeropyrum pernix (strain ATCC 700893 / DSM 11879 / JCM 9820 / NBRC 100138 / K1) GN=APE_0207 PE=3 SV=1	K07143	UNKNOWN	0.0,0.0,0.0,0.0,0.0,0.0,0.0,0.0,0.0,0.0,0.0,0.0,0.0,0.0,0.0,0.0,0.0,0.0,0.0,0.0,0.0,0.0,0.0,0.0,0.0,0.0,0.0,0.0,0.0,0.0,0.0,0.0,0.0,0.0,1.0,0.0,0.0,0.0,0.0,0.0,0.0,0.0,0.0,0.0
MG: Uncharacterized oxidoreductase YulF OS=Bacillus subtilis (strain 168) GN=yulF PE=3 SV=2 [O05265] Score: 216.0	UNKNOWN	1.-.-.-	0.0,0.0,0.0,0.0,0.0,0.0,0.0,0.0,0.0,0.0,0.0,0.0,0.0,0.0,1.0,0.0,0.0,0.0,0.0,0.0,0.0,0.0,0.0,0.0,0.0,0.0,0.0,0.0,0.0,0.0,0.0,0.0,0.0,0.0,0.0,0.0,0.0,0.0,0.0,0.0,0.0,0.0,0.0,0.0
MG: Ribosomal RNA small subunit methyltransferase G OS=Alkaliphilus metalliredigens (strain QYMF) GN=rsmG PE=3 SV=1 [A6TXE3] Score: 239.0	K03501	2.1.1.-	0.0,0.0,0.0,0.0,0.0,0.0,0.0,0.0,0.0,0.0,0.0,0.0,0.0,0.0,0.0,0.0,0.0,0.0,0.0,0.0,0.0,0.0,0.0,0.0,0.0,0.0,0.0,0.0,0.0,0.0,0.0,0.0,0.0,0.0,0.0,0.0,0.0,0.0,1.0,0.0,1.0,0.0,0.0,0.0
MG: Ribonuclease Y OS=Streptococcus thermophilus (strain ATCC BAA-491 / LMD-9) GN=rny PE=3 SV=1 [Q03M43] Score: 535.0	K18682	3.1.-.-	4.0,3.0,3.0,1.0,8.0,9.0,0.0,0.0,6.0,6.0,7.0,6.0,1.0,0.0,0.0,0.0,1.0,0.0,0.0,0.0,3.0,3.0,0.0,0.0,4.0,16.0,9.0,2.0,0.0,0.0,0.0,0.0,0.0,0.0,0.0,0.0,1.0,1.0,1.0,0.0,0.0,1.0,0.0,0.0
MYO1F_MOUSE Unconventional myosin-If OS=Mus musculus GN=Myo1f PE=1 SV=1	UNKNOWN	UNKNOWN	0.0,0.0,0.0,0.0,0.0,0.0,0.0,0.0,0.0,0.0,0.0,0.0,0.0,0.0,0.0,0.0,0.0,0.0,0.0,0.0,0.0,0.0,0.0,0.0,0.0,1.0,0.0,0.0,0.0,0.0,0.0,0.0,0.0,0.0,0.0,0.0,0.0,0.0,0.0,0.0,0.0,0.0,0.0,0.0
MG: Putative YfeABCD regulator YfeE OS=Yersinia pestis GN=yfeE PE=4 SV=2 [Q56956] Score: 114.0	UNKNOWN	UNKNOWN	0.0,0.0,0.0,0.0,0.0,0.0,2.0,0.0,0.0,0.0,1.0,0.0,0.0,0.0,0.0,0.0,0.0,0.0,0.0,0.0,0.0,0.0,0.0,0.0,0.0,0.0,0.0,0.0,0.0,0.0,0.0,0.0,0.0,0.0,0.0,0.0,0.0,0.0,0.0,0.0,0.0,0.0,0.0,0.0
NU2M_ARATH NADH-ubiquinone oxidoreductase chain 2 OS=Arabidopsis thaliana GN=ND2 PE=2 SV=2	K03879	1.6.5.3	0.0,1.0,1.0,1.0,0.0,0.0,0.0,0.0,0.0,1.0,0.0,0.0,0.0,0.0,0.0,0.0,0.0,0.0,0.0,0.0,0.0,0.0,0.0,0.0,0.0,0.0,0.0,0.0,0.0,0.0,0.0,0.0,0.0,1.0,0.0,0.0,0.0,0.0,0.0,0.0,0.0,0.0,0.0,0.0
MG: UPF0092 membrane protein RC0893 OS=Rickettsia conorii (strain ATCC VR-613 / Malish 7) GN=RC0893 PE=3 SV=1 [Q92H78] Score: 53.1	K03210	UNKNOWN	14.0,13.0,10.0,11.0,18.0,13.0,11.0,17.0,7.0,8.0,5.0,5.0,0.0,0.0,0.0,0.0,0.0,0.0,0.0,0.0,11.0,8.0,9.0,14.0,0.0,0.0,0.0,0.0,4.0,1.0,1.0,0.0,1.0,1.0,2.0,4.0,0.0,0.0,2.0,0.0,1.0,0.0,0.0,0.0
MG: Probable cysteine desulfurase OS=Methanothermobacter thermautotrophicus (strain ATCC 29096 / DSM 1053 / JCM 10044 / NBRC 100330 / Delta H) GN=csd PE=3 SV=1 [O27442] Score: 203.0	UNKNOWN	2.8.1.7	0.0,0.0,0.0,0.0,0.0,0.0,0.0,1.0,0.0,0.0,0.0,0.0,0.0,1.0,0.0,1.0,0.0,0.0,1.0,0.0,0.0,0.0,0.0,0.0,0.0,0.0,2.0,0.0,0.0,0.0,0.0,0.0,0.0,0.0,0.0,0.0,0.0,0.0,0.0,0.0,0.0,0.0,0.0,0.0
MG: 30S ribosomal protein S3Ae OS=Methanoculleus marisnigri (strain ATCC 35101 / DSM 1498 / JR1) GN=rps3ae PE=3 SV=1 [A3CSL0] Score: 378.0	K02984	UNKNOWN	3.0,1.0,3.0,1.0,17.0,14.0,12.0,8.0,5.0,2.0,2.0,2.0,45.0,43.0,29.0,40.0,45.0,23.0,13.0,32.0,4.0,2.0,0.0,0.0,15.0,20.0,14.0,5.0,13.0,9.0,7.0,7.0,2.0,2.0,9.0,6.0,8.0,13.0,3.0,1.0,0.0,0.0,0.0,0.0
RPOC_COREF DNA-directed RNA polymerase subunit beta OS=Corynebacterium efficiens (strain DSM 44549 / YS-314 / AJ 12310 / JCM 11189 / NBRC 100395) GN=rpoC PE=3 SV=1	K03046	2.7.7.6	2.0,3.0,5.0,1.0,1.0,1.0,3.0,2.0,2.0,1.0,1.0,2.0,11.0,7.0,15.0,12.0,6.0,7.0,6.0,7.0,0.0,0.0,0.0,0.0,4.0,0.0,0.0,0.0,0.0,1.0,1.0,1.0,0.0,0.0,1.0,5.0,3.0,4.0,0.0,0.0,1.0,0.0,2.0,0.0
SEC10_YEAST Exocyst complex component SEC10 OS=Saccharomyces cerevisiae (strain ATCC 204508 / S288c) GN=SEC10 PE=1 SV=1	K19984	UNKNOWN	0.0,0.0,0.0,1.0,0.0,0.0,0.0,0.0,0.0,0.0,0.0,0.0,0.0,0.0,0.0,0.0,0.0,0.0,0.0,0.0,0.0,0.0,0.0,0.0,0.0,0.0,0.0,0.0,0.0,0.0,0.0,0.0,0.0,0.0,0.0,0.0,0.0,0.0,0.0,0.0,0.0,0.0,0.0,0.0
MG: Uncharacterized protein MJ0073 OS=Methanocaldococcus jannaschii (strain ATCC 43067 / DSM 2661 / JAL-1 / JCM 10045 / NBRC 100440) GN=MJ0073 PE=4 SV=1 [Q60379] Score: 64.3	UNKNOWN	UNKNOWN	0.0,0.0,0.0,0.0,0.0,0.0,0.0,0.0,1.0,0.0,0.0,0.0,0.0,0.0,0.0,0.0,0.0,0.0,0.0,0.0,0.0,0.0,0.0,0.0,0.0,0.0,0.0,0.0,0.0,0.0,0.0,0.0,0.0,0.0,0.0,0.0,0.0,0.0,0.0,0.0,0.0,0.0,0.0,0.0
MG: Outer membrane protein TolC OS=Vibrio cholerae serotype O1 (strain ATCC 39315 / El Tor Inaba N16961) GN=tolC PE=1 SV=1 [Q9K2Y1] Score: 52.4	K12340	UNKNOWN	0.0,0.0,0.0,0.0,0.0,0.0,0.0,0.0,0.0,0.0,0.0,0.0,1.0,0.0,1.0,0.0,0.0,0.0,0.0,0.0,0.0,0.0,0.0,0.0,0.0,0.0,0.0,0.0,0.0,0.0,0.0,0.0,0.0,0.0,0.0,0.0,0.0,0.0,0.0,0.0,0.0,0.0,0.0,0.0
NU1M_METSE NADH-ubiquinone oxidoreductase chain 1 OS=Metridium senile GN=ND1 PE=3 SV=1	UNKNOWN	1.6.5.3	0.0,0.0,0.0,0.0,0.0,0.0,0.0,0.0,0.0,0.0,0.0,0.0,0.0,0.0,0.0,0.0,0.0,0.0,0.0,0.0,0.0,0.0,0.0,0.0,0.0,0.0,1.0,0.0,0.0,0.0,0.0,0.0,0.0,0.0,0.0,0.0,0.0,0.0,0.0,0.0,0.0,0.0,0.0,0.0
MG: Phosphoglycolate phosphatase OS=Synechococcus elongatus (strain PCC 7942) GN=cbbZ PE=3 SV=2 [Q55039] Score: 43.5	K01091	3.1.3.18	0.0,0.0,0.0,0.0,0.0,0.0,0.0,0.0,0.0,0.0,0.0,0.0,0.0,0.0,0.0,0.0,0.0,0.0,0.0,0.0,0.0,0.0,0.0,0.0,0.0,2.0,2.0,0.0,0.0,0.0,0.0,0.0,0.0,0.0,0.0,0.0,0.0,0.0,0.0,0.0,0.0,0.0,0.0,0.0
MG: DNA-binding protein HRL53 OS=Rhizobium leguminosarum PE=1 SV=1 [P02348] Score: 63.5	UNKNOWN	UNKNOWN	0.0,0.0,0.0,0.0,69.0,79.0,22.0,31.0,33.0,3.0,2.0,2.0,0.0,0.0,0.0,0.0,0.0,0.0,0.0,0.0,94.0,74.0,24.0,21.0,0.0,0.0,0.0,0.0,28.0,24.0,25.0,2.0,8.0,4.0,24.0,14.0,3.0,5.0,20.0,11.0,0.0,0.0,0.0,0.0
PFD5_ARATH Probable prefoldin subunit 5 OS=Arabidopsis thaliana GN=At5g23290 PE=2 SV=1	K04797	UNKNOWN	0.0,0.0,0.0,0.0,0.0,0.0,0.0,0.0,0.0,0.0,0.0,0.0,0.0,0.0,0.0,0.0,0.0,0.0,0.0,0.0,0.0,0.0,0.0,0.0,0.0,0.0,0.0,0.0,0.0,0.0,0.0,0.0,0.0,0.0,0.0,0.0,0.0,0.0,0.0,1.0,0.0,0.0,0.0,0.0
MG: Formylaminopyrimidine transport permease protein ThiX OS=Bacillus halodurans (strain ATCC BAA-125 / DSM 18197 / FERM 7344 / JCM 9153 / C-125) GN=thiX PE=3 SV=1 [Q9K9G6] Score: 162.0	K15599	UNKNOWN	0.0,0.0,0.0,0.0,0.0,0.0,0.0,0.0,0.0,0.0,0.0,0.0,0.0,0.0,0.0,0.0,0.0,1.0,0.0,0.0,0.0,0.0,0.0,0.0,0.0,0.0,0.0,0.0,0.0,0.0,0.0,0.0,0.0,0.0,0.0,0.0,0.0,0.0,0.0,0.0,0.0,0.0,0.0,0.0
MG: UPF0147 protein MTH_1407 OS=Methanothermobacter thermautotrophicus (strain ATCC 29096 / DSM 1053 / JCM 10044 / NBRC 100330 / Delta H) GN=MTH_1407 PE=3 SV=1 [O27458] Score: 126.0	UNKNOWN	UNKNOWN	0.0,0.0,0.0,0.0,0.0,0.0,0.0,0.0,0.0,0.0,0.0,0.0,0.0,0.0,0.0,0.0,0.0,0.0,0.0,0.0,2.0,1.0,1.0,0.0,0.0,0.0,0.0,0.0,0.0,0.0,0.0,0.0,0.0,0.0,0.0,0.0,0.0,0.0,0.0,0.0,0.0,0.0,0.0,0.0
PGK_ECOLI Phosphoglycerate kinase OS=Escherichia coli (strain K12) GN=pgk PE=1 SV=2	K00927	2.7.2.3	0.0,0.0,0.0,0.0,0.0,0.0,0.0,0.0,0.0,0.0,0.0,0.0,0.0,0.0,0.0,0.0,0.0,0.0,0.0,0.0,0.0,0.0,0.0,0.0,0.0,0.0,0.0,0.0,0.0,0.0,0.0,0.0,0.0,0.0,0.0,0.0,0.0,0.0,0.0,0.0,1.0,0.0,34.0,3.0
MG: Serine hydroxymethyltransferase OS=Geobacter uraniireducens (strain Rf4) GN=glyA PE=3 SV=1 [A5GF66] Score: 561.0	K00600	2.1.2.1	21.0,19.0,11.0,11.0,5.0,9.0,243.0,14.0,11.0,11.0,12.0,12.0,31.0,26.0,40.0,18.0,27.0,24.0,10.0,5.0,27.0,43.0,52.0,47.0,7.0,10.0,7.0,7.0,32.0,26.0,10.0,18.0,10.0,7.0,9.0,11.0,25.0,16.0,1.0,2.0,4.0,0.0,11.0,6.0
MG: Transcription termination factor Rho OS=Bacillus subtilis (strain 168) GN=rho PE=3 SV=3 [Q03222] Score: 338.0	K03628	3.6.4.-	2.0,0.0,1.0,1.0,4.0,4.0,1.0,0.0,0.0,4.0,3.0,12.0,3.0,0.0,3.0,0.0,6.0,0.0,0.0,0.0,1.0,0.0,0.0,0.0,8.0,6.0,6.0,0.0,0.0,0.0,0.0,1.0,4.0,10.0,17.0,13.0,1.0,0.0,0.0,0.0,0.0,0.0,8.0,0.0
LEGB_GOSHI Legumin B OS=Gossypium hirsutum GN=LEGB PE=2 SV=1	UNKNOWN	UNKNOWN	0.0,0.0,0.0,0.0,0.0,0.0,0.0,0.0,0.0,0.0,0.0,0.0,0.0,0.0,0.0,0.0,0.0,0.0,4.0,0.0,0.0,0.0,0.0,0.0,0.0,0.0,0.0,0.0,0.0,0.0,0.0,0.0,0.0,0.0,0.0,0.0,0.0,0.0,0.0,0.0,0.0,0.0,0.0,0.0
MG: Adenine deaminase 2 OS=Desulfotalea psychrophila (strain LSv54 / DSM 12343) GN=ade2 PE=3 SV=1 [Q6ANH1] Score: 760.0	K01486	3.5.4.2	0.0,0.0,0.0,0.0,0.0,0.0,1.0,0.0,0.0,0.0,0.0,0.0,0.0,0.0,0.0,0.0,0.0,0.0,0.0,0.0,0.0,0.0,1.0,0.0,0.0,0.0,0.0,0.0,0.0,0.0,0.0,0.0,2.0,0.0,5.0,2.0,0.0,0.0,0.0,0.0,0.0,0.0,0.0,0.0
MG: Probable fructose-bisphosphate aldolase OS=Bacillus subtilis (strain 168) GN=fbaA PE=1 SV=2 [P13243] Score: 296.0	K01624	4.1.2.13	8.0,6.0,2.0,0.0,5.0,4.0,0.0,0.0,7.0,10.0,8.0,9.0,46.0,20.0,28.0,17.0,45.0,27.0,12.0,23.0,0.0,0.0,0.0,0.0,32.0,24.0,15.0,12.0,0.0,0.0,0.0,0.0,11.0,10.0,6.0,5.0,0.0,0.0,8.0,6.0,0.0,0.0,1.0,0.0
RECX_LISIN Regulatory protein RecX OS=Listeria innocua serovar 6a (strain CLIP 11262) GN=recX PE=3 SV=1	K03565	UNKNOWN	0.0,0.0,0.0,0.0,0.0,0.0,0.0,0.0,0.0,0.0,0.0,0.0,1.0,0.0,0.0,0.0,0.0,0.0,0.0,0.0,0.0,0.0,0.0,0.0,0.0,0.0,0.0,0.0,0.0,0.0,0.0,0.0,0.0,0.0,0.0,0.0,0.0,0.0,0.0,0.0,0.0,0.0,0.0,0.0
MG: Pyruvate formate-lyase 1-activating enzyme OS=Escherichia coli (strain K12) GN=pflA PE=1 SV=2 [P0A9N4] Score: 262.0	K04069	1.97.1.4	0.0,0.0,0.0,0.0,0.0,0.0,0.0,0.0,0.0,0.0,0.0,0.0,0.0,0.0,0.0,0.0,0.0,0.0,0.0,3.0,0.0,0.0,0.0,0.0,0.0,0.0,0.0,0.0,0.0,0.0,0.0,0.0,0.0,0.0,0.0,0.0,0.0,0.0,0.0,0.0,0.0,0.0,0.0,0.0
RL27_BACSK 50S ribosomal protein L27 OS=Bacillus clausii (strain KSM-K16) GN=rpmA PE=3 SV=1	K02899	UNKNOWN	0.0,0.0,3.0,5.0,0.0,0.0,0.0,0.0,0.0,0.0,0.0,0.0,0.0,0.0,0.0,0.0,0.0,0.0,0.0,0.0,0.0,0.0,0.0,0.0,0.0,0.0,0.0,0.0,0.0,0.0,0.0,0.0,0.0,0.0,0.0,0.0,0.0,0.0,2.0,4.0,0.0,0.0,0.0,0.0
PSBO_FRIAG Oxygen-evolving enhancer protein 1, chloroplastic OS=Fritillaria agrestis GN=PSBO PE=2 SV=1	UNKNOWN	UNKNOWN	0.0,0.0,1.0,0.0,7.0,7.0,4.0,10.0,2.0,0.0,1.0,1.0,0.0,0.0,0.0,0.0,0.0,0.0,0.0,0.0,1.0,1.0,2.0,2.0,0.0,0.0,0.0,0.0,1.0,0.0,0.0,0.0,0.0,0.0,0.0,0.0,0.0,0.0,1.0,3.0,0.0,0.0,0.0,0.0
MG: Glycogen phosphorylase 1 OS=Dictyostelium discoideum GN=glpV PE=1 SV=3 [Q00766] Score: 369.0	K00688	2.4.1.1	0.0,0.0,13.0,13.0,0.0,0.0,0.0,0.0,0.0,0.0,0.0,0.0,0.0,0.0,0.0,0.0,0.0,0.0,0.0,0.0,0.0,0.0,0.0,0.0,0.0,0.0,0.0,0.0,0.0,0.0,0.0,0.0,0.0,0.0,0.0,0.0,0.0,0.0,0.0,0.0,0.0,0.0,0.0,0.0
POE_DROPS Protein purity of essence OS=Drosophila pseudoobscura pseudoobscura GN=poe PE=3 SV=1	K10691	UNKNOWN	0.0,0.0,0.0,0.0,0.0,0.0,0.0,0.0,0.0,0.0,0.0,0.0,0.0,0.0,0.0,0.0,0.0,1.0,0.0,0.0,0.0,0.0,0.0,0.0,0.0,0.0,0.0,0.0,0.0,0.0,0.0,0.0,0.0,0.0,0.0,0.0,0.0,0.0,0.0,0.0,0.0,0.0,0.0,0.0
HSPB1_CANFA Heat shock protein beta-1 OS=Canis familiaris GN=HSPB1 PE=2 SV=1	UNKNOWN	UNKNOWN	0.0,0.0,1.0,2.0,1.0,0.0,0.0,0.0,0.0,0.0,17.0,0.0,0.0,0.0,0.0,0.0,0.0,0.0,0.0,0.0,0.0,0.0,15.0,0.0,0.0,0.0,0.0,0.0,0.0,0.0,0.0,0.0,0.0,0.0,0.0,0.0,0.0,0.0,0.0,0.0,0.0,0.0,0.0,0.0
MG: Alanine--tRNA ligase OS=Thiomicrospira crunogena (strain XCL-2) GN=alaS PE=3 SV=1 [Q31F91] Score: 566.0	K01872	6.1.1.7	0.0,0.0,0.0,0.0,0.0,0.0,0.0,0.0,0.0,0.0,0.0,0.0,0.0,1.0,0.0,0.0,2.0,0.0,0.0,0.0,0.0,0.0,0.0,0.0,0.0,0.0,0.0,1.0,1.0,0.0,0.0,0.0,0.0,0.0,0.0,0.0,0.0,0.0,0.0,1.0,0.0,0.0,12.0,1.0
RL29_STRE4 50S ribosomal protein L29 OS=Streptococcus equi subsp. equi (strain 4047) GN=rpmC PE=3 SV=1	K02904	UNKNOWN	2.0,3.0,12.0,16.0,8.0,12.0,17.0,22.0,10.0,10.0,9.0,10.0,19.0,13.0,11.0,22.0,20.0,12.0,0.0,16.0,37.0,36.0,36.0,40.0,6.0,14.0,15.0,15.0,19.0,12.0,14.0,18.0,24.0,17.0,17.0,19.0,48.0,52.0,24.0,29.0,2.0,3.0,20.0,8.0
USPB_CROS8 Universal stress protein B OS=Cronobacter sakazakii (strain ATCC BAA-894) GN=uspB PE=3 SV=1	K06144	UNKNOWN	0.0,0.0,0.0,0.0,0.0,0.0,0.0,0.0,0.0,0.0,0.0,0.0,0.0,0.0,0.0,0.0,0.0,0.0,0.0,0.0,0.0,0.0,0.0,0.0,0.0,0.0,0.0,0.0,0.0,0.0,0.0,0.0,0.0,0.0,0.0,0.0,0.0,0.0,0.0,0.0,1.0,0.0,0.0,0.0
MG: Uncharacterized N-acetyltransferase YjhQ OS=Escherichia coli (strain K12) GN=yjhQ PE=3 SV=1 [P39368] Score: 53.5	UNKNOWN	2.3.1.-	0.0,0.0,0.0,0.0,0.0,0.0,0.0,0.0,0.0,0.0,0.0,0.0,0.0,1.0,0.0,0.0,0.0,0.0,0.0,0.0,0.0,0.0,0.0,0.0,1.0,0.0,0.0,0.0,0.0,0.0,0.0,0.0,0.0,0.0,0.0,0.0,0.0,0.0,0.0,0.0,0.0,0.0,0.0,0.0
MG: Uncharacterized protein MJ1118 OS=Methanocaldococcus jannaschii (strain ATCC 43067 / DSM 2661 / JAL-1 / JCM 10045 / NBRC 100440) GN=MJ1118 PE=4 SV=1 [Q58518] Score: 42.7	UNKNOWN	UNKNOWN	0.0,0.0,0.0,0.0,9.0,11.0,7.0,10.0,4.0,7.0,9.0,8.0,0.0,0.0,0.0,0.0,0.0,0.0,0.0,0.0,0.0,0.0,0.0,0.0,0.0,0.0,0.0,0.0,0.0,0.0,0.0,0.0,0.0,0.0,4.0,2.0,0.0,0.0,0.0,0.0,0.0,0.0,0.0,0.0
MG: Pyruvate-flavodoxin oxidoreductase (Fragment) OS=Nostoc sp. (strain ATCC 29151 / PCC 7119) GN=nifJ PE=3 SV=1 [Q9APC2] Score: 231.0	UNKNOWN	1.2.7.-	0.0,0.0,0.0,0.0,0.0,0.0,3.0,1.0,0.0,3.0,0.0,0.0,7.0,1.0,5.0,4.0,4.0,4.0,0.0,2.0,0.0,0.0,1.0,1.0,0.0,0.0,0.0,0.0,0.0,0.0,0.0,0.0,0.0,0.0,1.0,0.0,1.0,0.0,0.0,0.0,0.0,1.0,0.0,1.0
GLYG5_SOYBN Glycinin OS=Glycine max PE=1 SV=1	UNKNOWN	UNKNOWN	3.0,0.0,0.0,0.0,8.0,5.0,6.0,5.0,21.0,16.0,14.0,19.0,32.0,29.0,11.0,4.0,25.0,5.0,5.0,10.0,32.0,27.0,74.0,80.0,35.0,34.0,42.0,25.0,269.0,211.0,170.0,181.0,98.0,93.0,139.0,123.0,70.0,79.0,0.0,4.0,0.0,0.0,1.0,12.0
MG: 50S ribosomal protein L13 OS=Pasteurella multocida (strain Pm70) GN=rplM PE=3 SV=1 [Q9CNB2] Score: 216.0	K02871	UNKNOWN	0.0,0.0,0.0,0.0,0.0,0.0,0.0,0.0,0.0,0.0,0.0,0.0,0.0,0.0,0.0,0.0,0.0,0.0,0.0,7.0,0.0,0.0,0.0,0.0,0.0,0.0,0.0,0.0,0.0,0.0,0.0,0.0,0.0,0.0,0.0,0.0,0.0,0.0,0.0,0.0,0.0,0.0,2.0,0.0
ATG11_DEBHA Autophagy-related protein 11 OS=Debaryomyces hansenii (strain ATCC 36239 / CBS 767 / JCM 1990 / NBRC 0083 / IGC 2968) GN=ATG11 PE=3 SV=2	K08330	UNKNOWN	0.0,0.0,0.0,0.0,0.0,0.0,0.0,0.0,0.0,0.0,0.0,0.0,0.0,0.0,0.0,0.0,0.0,0.0,0.0,0.0,0.0,0.0,0.0,0.0,0.0,0.0,0.0,0.0,0.0,0.0,0.0,0.0,0.0,0.0,1.0,0.0,0.0,0.0,0.0,0.0,0.0,0.0,0.0,0.0
PLAP_KLEPN Probable low-affinity putrescine importer PlaP (Fragment) OS=Klebsiella pneumoniae GN=plaP PE=3 SV=1	UNKNOWN	UNKNOWN	0.0,0.0,1.0,0.0,0.0,0.0,0.0,0.0,0.0,0.0,0.0,0.0,0.0,0.0,0.0,0.0,0.0,0.0,0.0,0.0,0.0,0.0,0.0,0.0,0.0,0.0,0.0,0.0,0.0,0.0,0.0,0.0,0.0,0.0,0.0,0.0,0.0,0.0,0.0,0.0,0.0,0.0,0.0,0.0
MG: Probable signal peptidase I-2 OS=Synechocystis sp. (strain PCC 6803 / Kazusa) GN=lepB2 PE=3 SV=1 [P73157] Score: 148.0	K03100	3.4.21.89	2.0,0.0,2.0,2.0,13.0,12.0,10.0,11.0,8.0,3.0,0.0,2.0,27.0,36.0,21.0,7.0,23.0,1.0,1.0,11.0,0.0,4.0,5.0,0.0,2.0,0.0,0.0,0.0,5.0,1.0,4.0,2.0,0.0,0.0,2.0,2.0,4.0,1.0,3.0,4.0,0.0,0.0,0.0,0.0
PSBH_SORBI Photosystem II reaction center protein H OS=Sorghum bicolor GN=psbH PE=3 SV=1	UNKNOWN	UNKNOWN	4.0,3.0,1.0,0.0,23.0,36.0,22.0,23.0,2.0,2.0,1.0,3.0,0.0,0.0,0.0,0.0,0.0,0.0,0.0,0.0,2.0,3.0,0.0,0.0,0.0,0.0,0.0,0.0,5.0,3.0,1.0,2.0,1.0,3.0,2.0,0.0,0.0,2.0,2.0,1.0,0.0,0.0,0.0,0.0
MG: 65 kDa protein OS=Zymomonas mobilis subsp. mobilis (strain ATCC 10988 / DSM 424 / LMG 404 / NCIMB 8938 / NRRL B-806 / ZM1) GN=Zmob_1874 PE=3 SV=2 [P15255] Score: 107.0	UNKNOWN	UNKNOWN	0.0,0.0,0.0,0.0,0.0,0.0,0.0,0.0,0.0,0.0,0.0,0.0,1.0,0.0,0.0,0.0,1.0,0.0,0.0,0.0,0.0,0.0,0.0,0.0,0.0,0.0,0.0,0.0,0.0,0.0,0.0,0.0,0.0,0.0,0.0,0.0,0.0,0.0,0.0,0.0,0.0,0.0,0.0,0.0
UTP25_PENMQ U3 small nucleolar RNA-associated protein 25 OS=Penicillium marneffei (strain ATCC 18224 / CBS 334.59 / QM 7333) GN=utp25 PE=3 SV=1	UNKNOWN	UNKNOWN	0.0,0.0,0.0,0.0,0.0,0.0,0.0,0.0,0.0,0.0,0.0,0.0,0.0,0.0,0.0,0.0,0.0,1.0,0.0,0.0,0.0,0.0,0.0,0.0,0.0,0.0,0.0,0.0,0.0,0.0,0.0,0.0,0.0,0.0,0.0,0.0,0.0,0.0,0.0,0.0,0.0,0.0,0.0,0.0
RNH_TOLAT Ribonuclease H OS=Tolumonas auensis (strain DSM 9187 / TA4) GN=rnhA PE=3 SV=1	K03469	3.1.26.4	0.0,0.0,0.0,1.0,0.0,0.0,0.0,0.0,0.0,0.0,0.0,0.0,0.0,0.0,0.0,0.0,0.0,0.0,0.0,0.0,0.0,0.0,0.0,0.0,0.0,0.0,0.0,0.0,0.0,1.0,0.0,0.0,0.0,0.0,0.0,0.0,0.0,0.0,0.0,0.0,0.0,0.0,0.0,0.0
MG: Phosphoglycerate transport regulatory protein PgtC OS=Salmonella typhi GN=pgtC PE=3 SV=1 [P0A234] Score: 89.7	K08478	UNKNOWN	0.0,0.0,0.0,0.0,0.0,0.0,0.0,0.0,0.0,0.0,0.0,0.0,0.0,0.0,0.0,0.0,0.0,0.0,0.0,0.0,0.0,0.0,0.0,0.0,0.0,0.0,0.0,0.0,0.0,0.0,0.0,0.0,0.0,0.0,0.0,0.0,0.0,0.0,0.0,0.0,1.0,10.0,0.0,0.0
MG: Cytokinin riboside 5'-monophosphate phosphoribohydrolase OS=Mycobacterium tuberculosis (strain ATCC 25618 / H37Rv) GN=log PE=1 SV=1 [O05306] Score: 63.9	K06966	3.2.2.n1	0.0,0.0,0.0,0.0,0.0,0.0,0.0,0.0,2.0,2.0,4.0,4.0,0.0,0.0,0.0,0.0,0.0,0.0,0.0,0.0,13.0,11.0,12.0,12.0,0.0,0.0,0.0,0.0,8.0,4.0,4.0,4.0,0.0,0.0,0.0,0.0,0.0,0.0,0.0,1.0,0.0,0.0,0.0,0.0
MG: UDP-N-acetylmuramoyl-L-alanyl-D-glutamate--2,6-diaminopimelate ligase OS=Alkaliphilus metalliredigens (strain QYMF) GN=murE PE=3 SV=1 [A6TS66] Score: 247.0	K01928	6.3.2.13	0.0,0.0,0.0,0.0,0.0,0.0,0.0,0.0,0.0,0.0,0.0,0.0,0.0,0.0,0.0,0.0,0.0,0.0,0.0,0.0,0.0,0.0,1.0,0.0,0.0,0.0,0.0,0.0,0.0,0.0,0.0,0.0,0.0,0.0,0.0,0.0,0.0,0.0,0.0,0.0,0.0,0.0,0.0,0.0
MG: Translation initiation factor IF-2 OS=Caldanaerobacter subterraneus subsp. tengcongensis (strain DSM 15242 / JCM 11007 / NBRC 100824 / MB4) GN=infB PE=3 SV=1 [Q8RA37] Score: 341.0	K02519	UNKNOWN	0.0,0.0,0.0,1.0,0.0,0.0,1.0,0.0,0.0,0.0,0.0,0.0,0.0,0.0,1.0,0.0,0.0,0.0,0.0,0.0,0.0,0.0,0.0,1.0,0.0,0.0,0.0,0.0,0.0,0.0,0.0,0.0,0.0,0.0,0.0,0.0,0.0,0.0,0.0,0.0,0.0,0.0,0.0,0.0
MG: Putative transposase for insertion sequence element IS986/IS6110 OS=Mycobacterium tuberculosis (strain ATCC 25618 / H37Rv) GN=Rv0796 PE=3 SV=1 [P9WKH9] Score: 251.0	UNKNOWN	UNKNOWN	0.0,0.0,0.0,0.0,1.0,0.0,0.0,0.0,0.0,0.0,0.0,0.0,0.0,0.0,0.0,0.0,0.0,0.0,0.0,0.0,0.0,0.0,0.0,0.0,0.0,0.0,0.0,0.0,0.0,0.0,0.0,0.0,0.0,0.0,0.0,0.0,0.0,0.0,0.0,0.0,0.0,0.0,0.0,0.0
PYRC_MARMS Dihydroorotase OS=Marinomonas sp. (strain MWYL1) GN=pyrC PE=3 SV=1	K01465	3.5.2.3	0.0,0.0,0.0,0.0,0.0,0.0,0.0,0.0,0.0,0.0,0.0,0.0,0.0,0.0,0.0,0.0,0.0,0.0,0.0,0.0,0.0,0.0,0.0,0.0,0.0,0.0,0.0,0.0,0.0,0.0,0.0,0.0,0.0,0.0,0.0,0.0,0.0,0.0,0.0,0.0,0.0,0.0,0.0,1.0
G3PB_PEA Glyceraldehyde-3-phosphate dehydrogenase B, chloroplastic OS=Pisum sativum GN=GAPB PE=1 SV=2	UNKNOWN	1.2.1.13	0.0,0.0,0.0,0.0,8.0,0.0,0.0,2.0,0.0,0.0,0.0,0.0,2.0,1.0,0.0,2.0,1.0,0.0,0.0,6.0,0.0,0.0,0.0,0.0,5.0,0.0,0.0,0.0,0.0,0.0,2.0,0.0,0.0,0.0,0.0,9.0,0.0,0.0,0.0,2.0,0.0,0.0,0.0,2.0
MG: Type II secretion system protein D OS=Aeromonas hydrophila GN=exeD PE=3 SV=2 [P31780] Score: 109.0	UNKNOWN	UNKNOWN	0.0,0.0,0.0,0.0,2.0,1.0,0.0,1.0,2.0,3.0,2.0,2.0,29.0,21.0,178.0,138.0,10.0,57.0,8.0,122.0,2.0,0.0,0.0,0.0,0.0,0.0,0.0,0.0,0.0,0.0,1.0,1.0,1.0,0.0,3.0,1.0,0.0,0.0,2.0,0.0,0.0,0.0,0.0,0.0
MG: D-threonine aldolase OS=Arthrobacter sp. PE=1 SV=1 [O82872] Score: 188.0	K19967	4.1.2.42	0.0,0.0,0.0,0.0,0.0,0.0,1.0,1.0,0.0,0.0,0.0,0.0,0.0,0.0,0.0,0.0,0.0,0.0,0.0,0.0,0.0,0.0,0.0,0.0,0.0,0.0,0.0,0.0,0.0,0.0,0.0,0.0,0.0,0.0,0.0,0.0,0.0,0.0,0.0,0.0,0.0,0.0,0.0,0.0
P230_PLAF7 Gametocyte surface protein P230 OS=Plasmodium falciparum (isolate 3D7) GN=PFS230 PE=1 SV=1	UNKNOWN	UNKNOWN	0.0,0.0,1.0,0.0,0.0,0.0,0.0,0.0,0.0,0.0,0.0,0.0,0.0,0.0,0.0,0.0,0.0,0.0,0.0,0.0,0.0,0.0,0.0,0.0,0.0,0.0,0.0,0.0,0.0,0.0,0.0,0.0,0.0,0.0,0.0,0.0,0.0,0.0,0.0,0.0,0.0,0.0,0.0,0.0
MG: Uncharacterized protein YcaI OS=Escherichia coli (strain K12) GN=ycaI PE=4 SV=3 [P37443] Score: 62.4	K02238	UNKNOWN	0.0,0.0,0.0,0.0,0.0,0.0,0.0,0.0,0.0,0.0,2.0,0.0,0.0,1.0,0.0,3.0,0.0,2.0,0.0,1.0,0.0,0.0,0.0,0.0,0.0,0.0,0.0,0.0,0.0,0.0,0.0,0.0,0.0,0.0,0.0,0.0,0.0,0.0,0.0,0.0,0.0,0.0,0.0,0.0
ATPG_SPIOL ATP synthase gamma chain, chloroplastic OS=Spinacia oleracea GN=ATPC PE=1 SV=2	UNKNOWN	UNKNOWN	0.0,0.0,0.0,0.0,3.0,1.0,4.0,6.0,0.0,0.0,0.0,0.0,0.0,0.0,0.0,0.0,0.0,0.0,0.0,0.0,0.0,0.0,0.0,0.0,0.0,0.0,0.0,0.0,4.0,3.0,1.0,4.0,0.0,0.0,0.0,0.0,0.0,0.0,0.0,0.0,0.0,0.0,0.0,0.0
MG: RNA polymerase-binding transcription factor CarD OS=Mycobacterium smegmatis (strain ATCC 700084 / mc(2)155) GN=carD PE=1 SV=1 [A0R561] Score: 158.0	K07736	UNKNOWN	1.0,0.0,0.0,1.0,23.0,15.0,6.0,13.0,59.0,60.0,44.0,21.0,73.0,27.0,10.0,35.0,53.0,9.0,2.0,18.0,9.0,11.0,3.0,4.0,9.0,2.0,4.0,3.0,0.0,0.0,0.0,0.0,0.0,0.0,1.0,0.0,0.0,0.0,13.0,7.0,0.0,0.0,0.0,0.0
RHMD_KLEP7 L-rhamnonate dehydratase OS=Klebsiella pneumoniae subsp. pneumoniae (strain ATCC 700721 / MGH 78578) GN=rhmD PE=3 SV=1	K12661	4.2.1.90	0.0,0.0,0.0,0.0,0.0,0.0,0.0,0.0,0.0,0.0,0.0,0.0,0.0,1.0,0.0,0.0,0.0,0.0,0.0,0.0,0.0,0.0,0.0,0.0,0.0,0.0,0.0,0.0,0.0,0.0,0.0,0.0,0.0,0.0,0.0,0.0,0.0,0.0,0.0,0.0,0.0,0.0,0.0,0.0
MG: Putative branched-chain-amino-acid aminotransferase OS=Archaeoglobus fulgidus (strain ATCC 49558 / VC-16 / DSM 4304 / JCM 9628 / NBRC 100126) GN=ilvE PE=3 SV=1 [O29329] Score: 292.0	K00826	2.6.1.42	12.0,13.0,2.0,0.0,9.0,6.0,16.0,11.0,9.0,8.0,9.0,14.0,34.0,26.0,19.0,15.0,27.0,24.0,19.0,7.0,6.0,7.0,7.0,6.0,20.0,18.0,15.0,12.0,15.0,12.0,7.0,20.0,8.0,8.0,8.0,5.0,16.0,11.0,26.0,15.0,0.0,0.0,0.0,2.0
MG: Uncharacterized protein alr4393 OS=Nostoc sp. (strain PCC 7120 / UTEX 2576) GN=alr4393 PE=3 SV=2 [Q05070] Score: 107.0	UNKNOWN	UNKNOWN	0.0,0.0,0.0,1.0,0.0,0.0,0.0,0.0,0.0,0.0,1.0,2.0,3.0,7.0,0.0,1.0,0.0,1.0,0.0,0.0,0.0,0.0,0.0,0.0,0.0,0.0,0.0,0.0,0.0,0.0,0.0,0.0,0.0,0.0,5.0,3.0,4.0,5.0,0.0,0.0,0.0,0.0,0.0,0.0
MG: Pyridoxine kinase OS=Bacillus subtilis (strain 168) GN=pdxK PE=1 SV=1 [P39610] Score: 172.0	K00868	2.7.1.35	0.0,0.0,0.0,0.0,0.0,0.0,0.0,0.0,0.0,0.0,0.0,0.0,0.0,0.0,0.0,0.0,0.0,0.0,0.0,0.0,0.0,0.0,0.0,0.0,0.0,0.0,0.0,0.0,0.0,0.0,0.0,0.0,0.0,0.0,0.0,0.0,0.0,0.0,15.0,14.0,0.0,0.0,0.0,1.0
MG: Ribonuclease PH OS=Caldanaerobacter subterraneus subsp. tengcongensis (strain DSM 15242 / JCM 11007 / NBRC 100824 / MB4) GN=rph PE=3 SV=1 [Q8RC30] Score: 260.0	K00989	2.7.7.56	0.0,0.0,0.0,0.0,2.0,13.0,4.0,2.0,1.0,1.0,3.0,1.0,6.0,10.0,8.0,3.0,7.0,11.0,4.0,4.0,0.0,0.0,0.0,0.0,0.0,4.0,1.0,0.0,0.0,0.0,0.0,3.0,4.0,2.0,10.0,2.0,0.0,4.0,10.0,0.0,0.0,0.0,0.0,2.0
SERC5_MOUSE Serine incorporator 5 OS=Mus musculus GN=Serinc5 PE=2 SV=1	UNKNOWN	UNKNOWN	0.0,0.0,0.0,0.0,1.0,0.0,0.0,0.0,0.0,0.0,0.0,0.0,0.0,0.0,0.0,0.0,0.0,0.0,0.0,0.0,0.0,0.0,0.0,0.0,0.0,0.0,0.0,0.0,0.0,0.0,0.0,0.0,0.0,0.0,0.0,0.0,0.0,0.0,0.0,0.0,0.0,0.0,0.0,0.0
MG: Thiol-disulfide oxidoreductase ResA OS=Bacillus cereus (strain ATCC 14579 / DSM 31 / JCM 2152 / NBRC 15305 / NCIMB 9373 / NRRL B-3711) GN=resA PE=3 SV=1 [Q81FU5] Score: 51.2	UNKNOWN	UNKNOWN	0.0,0.0,0.0,1.0,0.0,0.0,0.0,0.0,0.0,0.0,0.0,0.0,1.0,1.0,0.0,1.0,1.0,0.0,0.0,0.0,6.0,9.0,0.0,1.0,6.0,7.0,9.0,5.0,0.0,0.0,2.0,2.0,2.0,0.0,3.0,3.0,0.0,0.0,3.0,2.0,0.0,1.0,0.0,1.0
MG: GTP pyrophosphokinase OS=Bacillus subtilis (strain 168) GN=relA PE=3 SV=3 [O54408] Score: 525.0	K00951	2.7.6.5	0.0,0.0,0.0,0.0,0.0,0.0,0.0,0.0,1.0,0.0,0.0,0.0,0.0,0.0,0.0,0.0,1.0,0.0,0.0,0.0,0.0,0.0,0.0,0.0,0.0,0.0,0.0,0.0,0.0,1.0,0.0,0.0,0.0,0.0,0.0,0.0,0.0,0.0,0.0,0.0,0.0,0.0,0.0,0.0
MG: V-type ATP synthase subunit F OS=Methanoculleus marisnigri (strain ATCC 35101 / DSM 1498 / JR1) GN=atpF PE=3 SV=1 [A3CS70] Score: 175.0	K02122	UNKNOWN	0.0,0.0,0.0,0.0,0.0,0.0,0.0,0.0,0.0,0.0,0.0,0.0,0.0,0.0,0.0,0.0,2.0,5.0,0.0,0.0,0.0,0.0,0.0,0.0,0.0,1.0,0.0,0.0,0.0,0.0,0.0,0.0,0.0,0.0,0.0,0.0,0.0,0.0,4.0,24.0,0.0,0.0,0.0,0.0
RS28_CAEEL 40S ribosomal protein S28 OS=Caenorhabditis elegans GN=rps-28 PE=3 SV=1	K02979	UNKNOWN	0.0,0.0,0.0,0.0,0.0,0.0,0.0,0.0,0.0,0.0,0.0,0.0,0.0,0.0,0.0,0.0,0.0,0.0,0.0,0.0,1.0,0.0,0.0,0.0,0.0,0.0,0.0,0.0,0.0,0.0,0.0,0.0,0.0,0.0,0.0,0.0,0.0,0.0,1.0,0.0,0.0,0.0,0.0,1.0
DHQSH_PERMH 3-dehydroquinate synthase homolog OS=Persephonella marina (strain DSM 14350 / EX-H1) GN=PERMA_1476 PE=3 SV=1	K11646	1.4.1.-	0.0,0.0,0.0,0.0,0.0,0.0,1.0,0.0,5.0,8.0,4.0,1.0,10.0,11.0,13.0,6.0,15.0,0.0,6.0,17.0,0.0,0.0,0.0,0.0,0.0,0.0,0.0,0.0,0.0,0.0,0.0,0.0,0.0,0.0,0.0,0.0,0.0,0.0,2.0,4.0,0.0,0.0,0.0,0.0
MG: Oligopeptide transport system permease protein OppB OS=Bacillus subtilis (strain 168) GN=oppB PE=2 SV=2 [P24138] Score: 292.0	K15581	UNKNOWN	0.0,0.0,0.0,0.0,0.0,0.0,0.0,0.0,0.0,0.0,0.0,0.0,0.0,0.0,0.0,0.0,0.0,0.0,0.0,0.0,0.0,0.0,0.0,0.0,0.0,0.0,0.0,0.0,0.0,0.0,1.0,0.0,0.0,0.0,0.0,0.0,0.0,0.0,0.0,0.0,0.0,0.0,0.0,0.0
MG: Gliding motility lipoprotein GldH homolog OS=Gramella forsetii (strain KT0803) GN=gldH PE=3 SV=2 [A0M6E0] Score: 52.4	UNKNOWN	UNKNOWN	0.0,0.0,0.0,0.0,0.0,0.0,1.0,1.0,0.0,0.0,0.0,0.0,0.0,0.0,0.0,0.0,0.0,0.0,0.0,0.0,0.0,0.0,0.0,0.0,0.0,0.0,0.0,0.0,0.0,0.0,0.0,0.0,0.0,0.0,0.0,0.0,0.0,0.0,0.0,0.0,0.0,0.0,0.0,0.0
MG: Protein-arginine kinase OS=Halothermothrix orenii (strain H 168 / OCM 544 / DSM 9562) GN=mcsB PE=3 SV=1 [B8D093] Score: 309.0	K19405	2.7.14.1	0.0,0.0,0.0,0.0,0.0,0.0,1.0,0.0,0.0,0.0,0.0,0.0,0.0,0.0,0.0,0.0,1.0,0.0,0.0,0.0,0.0,0.0,0.0,0.0,2.0,3.0,3.0,3.0,0.0,0.0,0.0,0.0,0.0,0.0,0.0,0.0,0.0,0.0,0.0,0.0,0.0,0.0,0.0,0.0
ZC3H4_MOUSE Zinc finger CCCH domain-containing protein 4 OS=Mus musculus GN=Zc3h4 PE=1 SV=2	UNKNOWN	UNKNOWN	0.0,0.0,0.0,0.0,0.0,1.0,0.0,0.0,0.0,0.0,0.0,0.0,0.0,0.0,0.0,0.0,0.0,0.0,0.0,0.0,0.0,0.0,0.0,0.0,0.0,0.0,0.0,0.0,0.0,0.0,0.0,0.0,0.0,0.0,0.0,0.0,0.0,0.0,0.0,0.0,0.0,0.0,0.0,0.0
ACT_SPOLI Actin (Fragment) OS=Spodoptera littoralis PE=2 SV=1	UNKNOWN	UNKNOWN	1.0,0.0,0.0,0.0,0.0,9.0,0.0,0.0,0.0,0.0,19.0,0.0,0.0,0.0,0.0,0.0,0.0,0.0,0.0,0.0,0.0,0.0,5.0,0.0,0.0,0.0,0.0,0.0,0.0,0.0,0.0,0.0,0.0,0.0,0.0,0.0,0.0,0.0,0.0,0.0,0.0,0.0,0.0,0.0
MG: Phosphopentomutase OS=Caldanaerobacter subterraneus subsp. tengcongensis (strain DSM 15242 / JCM 11007 / NBRC 100824 / MB4) GN=deoB PE=3 SV=1 [Q8RCG6] Score: 504.0	K01839	5.4.2.7	0.0,0.0,0.0,0.0,0.0,0.0,0.0,0.0,0.0,1.0,0.0,0.0,2.0,2.0,2.0,0.0,5.0,2.0,0.0,0.0,0.0,0.0,0.0,0.0,0.0,0.0,0.0,0.0,0.0,0.0,1.0,0.0,0.0,0.0,0.0,0.0,0.0,0.0,0.0,0.0,0.0,0.0,6.0,0.0
CLPP3_PROMT ATP-dependent Clp protease proteolytic subunit 3 OS=Prochlorococcus marinus (strain NATL2A) GN=clpP3 PE=3 SV=1	K01358	3.4.21.92	0.0,0.0,0.0,0.0,0.0,3.0,0.0,0.0,0.0,0.0,0.0,0.0,0.0,0.0,0.0,0.0,0.0,1.0,0.0,0.0,0.0,0.0,0.0,0.0,1.0,0.0,0.0,0.0,0.0,0.0,0.0,0.0,0.0,0.0,0.0,0.0,1.0,0.0,0.0,0.0,0.0,0.0,0.0,0.0
ICID_SOLTU Wound-induced proteinase inhibitor 1 OS=Solanum tuberosum PE=1 SV=2	UNKNOWN	UNKNOWN	0.0,0.0,0.0,0.0,0.0,0.0,0.0,0.0,0.0,0.0,0.0,0.0,0.0,0.0,0.0,0.0,0.0,0.0,0.0,0.0,0.0,0.0,0.0,0.0,40.0,33.0,22.0,27.0,0.0,0.0,0.0,0.0,4.0,2.0,5.0,0.0,0.0,0.0,0.0,0.0,0.0,0.0,0.0,0.0
MG: Lysozyme M1 OS=Streptomyces globisporus GN=acm PE=1 SV=1 [P25310] Score: 78.6	UNKNOWN	3.2.1.17	0.0,0.0,0.0,0.0,0.0,0.0,0.0,0.0,6.0,8.0,7.0,6.0,0.0,0.0,0.0,0.0,0.0,0.0,0.0,0.0,1.0,0.0,0.0,0.0,0.0,0.0,0.0,0.0,0.0,0.0,0.0,0.0,0.0,0.0,0.0,0.0,1.0,6.0,0.0,0.0,0.0,0.0,0.0,0.0
Y1385_STAES Putative universal stress protein SE_1385 OS=Staphylococcus epidermidis (strain ATCC 12228) GN=SE_1385 PE=3 SV=1	UNKNOWN	UNKNOWN	0.0,0.0,0.0,0.0,0.0,0.0,0.0,0.0,0.0,0.0,0.0,0.0,2.0,1.0,0.0,0.0,0.0,0.0,0.0,0.0,0.0,0.0,0.0,0.0,9.0,8.0,6.0,2.0,0.0,0.0,0.0,0.0,0.0,0.0,0.0,0.0,0.0,0.0,0.0,0.0,0.0,0.0,0.0,1.0
SMC_RHOS1 Chromosome partition protein Smc OS=Rhodobacter sphaeroides (strain ATCC 17029 / ATH 2.4.9) GN=smc PE=3 SV=2	K03529	UNKNOWN	0.0,0.0,0.0,0.0,0.0,0.0,0.0,0.0,0.0,0.0,0.0,0.0,0.0,0.0,0.0,0.0,0.0,0.0,0.0,0.0,0.0,0.0,0.0,0.0,0.0,0.0,0.0,0.0,0.0,0.0,0.0,0.0,0.0,0.0,0.0,0.0,0.0,0.0,0.0,0.0,0.0,7.0,0.0,0.0
MG: Probable 3-hydroxyacyl-CoA dehydrogenase OS=Bacillus subtilis (strain 168) GN=fadN PE=2 SV=2 [O32178] Score: 634.0	UNKNOWN	1.1.1.35	6.0,4.0,4.0,1.0,0.0,2.0,3.0,4.0,104.0,161.0,61.0,70.0,0.0,1.0,2.0,3.0,2.0,2.0,0.0,0.0,36.0,17.0,9.0,34.0,65.0,74.0,90.0,114.0,117.0,122.0,104.0,114.0,28.0,14.0,39.0,21.0,50.0,44.0,11.0,10.0,0.0,0.0,0.0,0.0
CAPSD_RMVHR Capsid protein OS=Ribgrass mosaic virus (strain Hr) GN=CP PE=1 SV=3	UNKNOWN	UNKNOWN	1.0,0.0,0.0,1.0,0.0,0.0,0.0,0.0,7.0,7.0,7.0,8.0,0.0,0.0,0.0,0.0,0.0,0.0,0.0,0.0,3.0,2.0,4.0,5.0,0.0,0.0,0.0,0.0,0.0,0.0,0.0,0.0,0.0,0.0,0.0,0.0,0.0,0.0,0.0,0.0,0.0,0.0,0.0,0.0
PPBI_BOVIN Intestinal-type alkaline phosphatase OS=Bos taurus GN=ALPI PE=1 SV=2	UNKNOWN	3.1.3.1	0.0,0.0,0.0,0.0,0.0,0.0,0.0,0.0,0.0,0.0,0.0,0.0,0.0,0.0,0.0,0.0,0.0,0.0,0.0,0.0,0.0,0.0,0.0,0.0,1.0,13.0,7.0,6.0,0.0,0.0,0.0,0.0,0.0,0.0,0.0,0.0,0.0,0.0,0.0,0.0,0.0,0.0,0.0,0.0
MG: Tyrosine recombinase XerD OS=Listeria monocytogenes serotype 4b (strain F2365) GN=xerD PE=3 SV=1 [Q71Y59] Score: 208.0	K04763	UNKNOWN	0.0,0.0,0.0,0.0,0.0,0.0,0.0,1.0,0.0,0.0,0.0,0.0,0.0,0.0,0.0,0.0,0.0,0.0,0.0,0.0,0.0,0.0,0.0,0.0,0.0,0.0,0.0,0.0,0.0,0.0,0.0,0.0,0.0,1.0,0.0,0.0,0.0,0.0,0.0,0.0,0.0,0.0,0.0,0.0
MG: Dehydrogenase/reductase SDR family protein 7-like OS=Anopheles gambiae GN=AGAP005532 PE=3 SV=3 [Q7Q732] Score: 186.0	K11166	1.1.-.-	0.0,0.0,0.0,0.0,0.0,0.0,0.0,0.0,0.0,0.0,0.0,0.0,0.0,0.0,0.0,0.0,0.0,0.0,0.0,0.0,0.0,0.0,0.0,0.0,0.0,0.0,0.0,0.0,0.0,0.0,0.0,0.0,0.0,0.0,0.0,0.0,0.0,0.0,0.0,0.0,0.0,0.0,1.0,0.0
MG: GTPase Obg OS=Brachyspira hyodysenteriae (strain ATCC 49526 / WA1) GN=obg PE=3 SV=1 [C0QX49] Score: 102.0	K03979	3.6.5.-	0.0,0.0,0.0,0.0,0.0,0.0,0.0,4.0,3.0,0.0,1.0,0.0,1.0,0.0,0.0,0.0,0.0,0.0,0.0,0.0,0.0,0.0,0.0,0.0,0.0,0.0,0.0,0.0,0.0,0.0,0.0,0.0,0.0,0.0,0.0,0.0,0.0,0.0,0.0,0.0,0.0,0.0,0.0,0.0
RTNLK_ARATH Reticulon-like protein B11 OS=Arabidopsis thaliana GN=RTNLB11 PE=2 SV=1	UNKNOWN	UNKNOWN	0.0,0.0,0.0,0.0,0.0,0.0,0.0,0.0,0.0,0.0,0.0,0.0,0.0,0.0,0.0,0.0,0.0,0.0,0.0,1.0,0.0,0.0,0.0,0.0,0.0,0.0,0.0,0.0,0.0,0.0,0.0,0.0,0.0,0.0,0.0,0.0,0.0,0.0,0.0,0.0,0.0,0.0,0.0,0.0
S10AC_BOVIN Protein S100-A12 OS=Bos taurus GN=S100A12 PE=1 SV=3	UNKNOWN	UNKNOWN	0.0,0.0,0.0,0.0,4.0,4.0,0.0,0.0,0.0,0.0,0.0,0.0,0.0,0.0,0.0,0.0,0.0,0.0,0.0,0.0,0.0,0.0,9.0,15.0,0.0,0.0,0.0,0.0,0.0,0.0,0.0,0.0,0.0,0.0,0.0,0.0,0.0,0.0,0.0,1.0,0.0,0.0,0.0,0.0
GSPC_ECOLI Putative type II secretion system protein C OS=Escherichia coli (strain K12) GN=gspC PE=2 SV=1	K02452	UNKNOWN	0.0,0.0,0.0,0.0,0.0,0.0,0.0,0.0,1.0,0.0,0.0,0.0,0.0,0.0,0.0,0.0,0.0,0.0,0.0,0.0,0.0,0.0,0.0,0.0,0.0,0.0,0.0,0.0,0.0,0.0,0.0,0.0,0.0,0.0,0.0,0.0,0.0,0.0,0.0,0.0,0.0,0.0,0.0,0.0
RBM18_DANRE Probable RNA-binding protein 18 OS=Danio rerio GN=rbm18 PE=2 SV=1	UNKNOWN	UNKNOWN	0.0,0.0,0.0,0.0,0.0,0.0,0.0,0.0,0.0,0.0,0.0,0.0,0.0,0.0,0.0,0.0,0.0,0.0,0.0,0.0,0.0,0.0,0.0,0.0,0.0,0.0,0.0,0.0,0.0,0.0,0.0,0.0,0.0,0.0,0.0,0.0,0.0,1.0,0.0,0.0,0.0,0.0,0.0,0.0
MG: UPF0754 membrane protein Bsph_0374 OS=Lysinibacillus sphaericus (strain C3-41) GN=Bsph_0374 PE=3 SV=1 [B1HVI2] Score: 43.9	UNKNOWN	UNKNOWN	0.0,0.0,0.0,0.0,0.0,0.0,0.0,0.0,1.0,0.0,0.0,0.0,0.0,0.0,0.0,0.0,0.0,0.0,0.0,0.0,0.0,0.0,0.0,0.0,0.0,0.0,0.0,0.0,0.0,0.0,0.0,0.0,0.0,0.0,0.0,0.0,0.0,0.0,0.0,0.0,0.0,0.0,0.0,0.0
RR14_CUCSA 30S ribosomal protein S14, chloroplastic OS=Cucumis sativus GN=rps14 PE=3 SV=1	K02954	UNKNOWN	0.0,0.0,0.0,0.0,0.0,0.0,0.0,0.0,0.0,0.0,0.0,0.0,0.0,0.0,0.0,0.0,0.0,0.0,0.0,0.0,0.0,0.0,0.0,0.0,0.0,2.0,0.0,0.0,0.0,0.0,0.0,0.0,0.0,0.0,0.0,0.0,0.0,0.0,0.0,0.0,0.0,0.0,0.0,0.0
RS7_PELTS 30S ribosomal protein S7 OS=Pelotomaculum thermopropionicum (strain DSM 13744 / JCM 10971 / SI) GN=rpsG PE=3 SV=1	K02992	UNKNOWN	28.0,20.0,18.0,19.0,28.0,14.0,18.0,11.0,4.0,6.0,5.0,4.0,27.0,17.0,11.0,15.0,19.0,5.0,0.0,10.0,10.0,9.0,0.0,1.0,35.0,32.0,28.0,26.0,3.0,2.0,5.0,5.0,18.0,23.0,26.0,17.0,4.0,1.0,8.0,9.0,0.0,0.0,0.0,0.0
MG: Putative nicotinate phosphoribosyltransferase OS=Thermoplasma acidophilum (strain ATCC 25905 / DSM 1728 / JCM 9062 / NBRC 15155 / AMRC-C165) GN=Ta1145 PE=1 SV=1 [Q9HJ28] Score: 234.0	K00763	6.3.4.21	0.0,0.0,0.0,0.0,0.0,0.0,0.0,1.0,0.0,1.0,1.0,0.0,0.0,0.0,1.0,1.0,4.0,0.0,0.0,0.0,0.0,0.0,0.0,0.0,0.0,0.0,0.0,0.0,0.0,0.0,0.0,0.0,0.0,0.0,2.0,0.0,0.0,0.0,0.0,0.0,0.0,0.0,0.0,0.0
RS4_AZOPC 30S ribosomal protein S4 OS=Azobacteroides pseudotrichonymphae genomovar. CFP2 GN=rpsD PE=3 SV=1	K02986	UNKNOWN	0.0,0.0,0.0,0.0,0.0,5.0,0.0,0.0,0.0,0.0,0.0,0.0,0.0,0.0,0.0,0.0,0.0,0.0,0.0,0.0,0.0,0.0,0.0,0.0,0.0,0.0,0.0,0.0,0.0,0.0,0.0,0.0,0.0,0.0,0.0,0.0,0.0,0.0,0.0,0.0,0.0,0.0,0.0,0.0
BCA1_ARATH Beta carbonic anhydrase 1, chloroplastic OS=Arabidopsis thaliana GN=BCA1 PE=1 SV=2	K01673	4.2.1.1	0.0,0.0,0.0,0.0,0.0,0.0,0.0,0.0,0.0,0.0,0.0,0.0,0.0,0.0,0.0,0.0,0.0,0.0,1.0,0.0,0.0,0.0,0.0,0.0,0.0,0.0,0.0,0.0,0.0,0.0,0.0,0.0,0.0,0.0,0.0,0.0,0.0,0.0,0.0,0.0,0.0,0.0,0.0,0.0
MG: Lysine/arginine/ornithine-binding periplasmic protein OS=Escherichia coli (strain K12) GN=argT PE=1 SV=3 [P09551] Score: 130.0	K10013	UNKNOWN	0.0,0.0,0.0,0.0,1.0,2.0,6.0,6.0,8.0,7.0,6.0,6.0,0.0,0.0,0.0,0.0,0.0,0.0,0.0,0.0,7.0,5.0,2.0,0.0,0.0,0.0,0.0,0.0,8.0,9.0,4.0,6.0,0.0,0.0,0.0,0.0,0.0,0.0,13.0,5.0,2.0,2.0,4.0,1.0
1A1L1_MOUSE 1-aminocyclopropane-1-carboxylate synthase-like protein 1 OS=Mus musculus GN=Accs PE=2 SV=1	UNKNOWN	UNKNOWN	0.0,0.0,0.0,0.0,0.0,0.0,0.0,0.0,0.0,0.0,0.0,0.0,0.0,0.0,0.0,0.0,0.0,0.0,0.0,0.0,0.0,0.0,0.0,0.0,0.0,0.0,0.0,0.0,0.0,1.0,0.0,0.0,0.0,0.0,0.0,0.0,0.0,0.0,0.0,0.0,0.0,0.0,0.0,0.0
MG: Peptide chain release factor 1 OS=Clostridium cellulolyticum (strain ATCC 35319 / DSM 5812 / JCM 6584 / H10) GN=prfA PE=3 SV=1 [B8I562] Score: 461.0	K02835	UNKNOWN	2.0,0.0,1.0,0.0,2.0,2.0,1.0,0.0,4.0,2.0,1.0,0.0,14.0,1.0,1.0,0.0,5.0,3.0,2.0,3.0,1.0,1.0,3.0,2.0,5.0,2.0,0.0,1.0,4.0,3.0,1.0,0.0,0.0,2.0,2.0,3.0,4.0,4.0,0.0,0.0,0.0,2.0,0.0,0.0
GSTP1_MACMU Glutathione S-transferase P OS=Macaca mulatta GN=GSTP1 PE=2 SV=3	K00799	2.5.1.18	0.0,0.0,0.0,0.0,0.0,0.0,0.0,0.0,0.0,0.0,24.0,0.0,0.0,0.0,0.0,0.0,0.0,0.0,0.0,0.0,0.0,0.0,0.0,9.0,0.0,0.0,0.0,0.0,0.0,0.0,0.0,0.0,0.0,0.0,0.0,0.0,0.0,0.0,0.0,0.0,0.0,0.0,0.0,0.0
MG: Fe(3+) ions import ATP-binding protein FbpC OS=Fusobacterium nucleatum subsp. nucleatum (strain ATCC 25586 / CIP 101130 / JCM 8532 / LMG 13131) GN=fbpC PE=3 SV=1 [Q8RGC8] Score: 473.0	K02010	3.6.3.30	2.0,0.0,0.0,0.0,0.0,0.0,0.0,0.0,1.0,0.0,0.0,0.0,2.0,0.0,0.0,0.0,0.0,0.0,0.0,1.0,0.0,0.0,0.0,0.0,0.0,0.0,0.0,0.0,0.0,0.0,1.0,0.0,1.0,1.0,0.0,0.0,0.0,5.0,0.0,1.0,0.0,0.0,0.0,0.0
CELA1_RAT Chymotrypsin-like elastase family member 1 OS=Rattus norvegicus GN=Cela1 PE=1 SV=1	K01326	3.4.21.36	0.0,0.0,0.0,0.0,9.0,5.0,4.0,2.0,0.0,0.0,0.0,0.0,0.0,0.0,0.0,0.0,0.0,0.0,0.0,0.0,15.0,14.0,33.0,16.0,0.0,0.0,0.0,0.0,0.0,0.0,0.0,0.0,5.0,2.0,11.0,6.0,0.0,0.0,0.0,1.0,0.0,0.0,0.0,0.0
CAPSD_CAMVS Capsid protein OS=Cauliflower mosaic virus (strain Strasbourg) GN=ORF IV PE=1 SV=1	UNKNOWN	UNKNOWN	0.0,0.0,0.0,0.0,0.0,0.0,0.0,1.0,0.0,0.0,0.0,0.0,0.0,0.0,0.0,0.0,0.0,0.0,0.0,0.0,0.0,0.0,0.0,0.0,0.0,0.0,0.0,0.0,0.0,0.0,0.0,0.0,0.0,0.0,0.0,0.0,0.0,0.0,0.0,0.0,0.0,0.0,0.0,0.0
MG: 5,6,7,8-tetrahydromethanopterin hydro-lyase OS=Methanosarcina barkeri (strain Fusaro / DSM 804) GN=faeA PE=1 SV=1 [Q46AU8] Score: 233.0	K10713	4.2.1.147	143.0,86.0,95.0,72.0,323.0,205.0,175.0,247.0,154.0,107.0,114.0,119.0,214.0,95.0,81.0,200.0,123.0,73.0,44.0,162.0,18.0,13.0,5.0,14.0,124.0,55.0,47.0,27.0,80.0,56.0,47.0,77.0,10.0,12.0,39.0,18.0,57.0,89.0,100.0,103.0,0.0,1.0,3.0,26.0
MG: DEAD-box ATP-dependent RNA helicase CshA OS=Bacillus subtilis (strain 168) GN=cshA PE=1 SV=2 [P96614] Score: 442.0	K05592	3.6.4.13	0.0,0.0,0.0,0.0,0.0,0.0,0.0,0.0,0.0,0.0,0.0,0.0,0.0,0.0,0.0,0.0,0.0,0.0,0.0,2.0,0.0,0.0,0.0,0.0,0.0,0.0,0.0,0.0,0.0,0.0,0.0,0.0,0.0,0.0,0.0,0.0,2.0,1.0,0.0,0.0,0.0,0.0,0.0,0.0
MG: Small basic protein OS=Bacillus subtilis (strain 168) GN=sbp PE=3 SV=1 [P28265] Score: 95.1	UNKNOWN	UNKNOWN	0.0,0.0,0.0,0.0,0.0,0.0,0.0,0.0,0.0,0.0,0.0,0.0,0.0,0.0,0.0,0.0,0.0,0.0,0.0,0.0,0.0,0.0,0.0,0.0,1.0,1.0,1.0,1.0,0.0,0.0,0.0,0.0,0.0,0.0,0.0,0.0,0.0,0.0,0.0,0.0,0.0,0.0,0.0,0.0
MG: Uncharacterized protein TP_1029 OS=Treponema pallidum (strain Nichols) GN=TP_1029 PE=4 SV=1 [O83992] Score: 129.0	UNKNOWN	UNKNOWN	0.0,0.0,0.0,0.0,0.0,0.0,0.0,0.0,0.0,0.0,0.0,0.0,0.0,0.0,0.0,0.0,0.0,0.0,0.0,0.0,0.0,0.0,0.0,0.0,0.0,0.0,0.0,0.0,1.0,1.0,0.0,2.0,0.0,0.0,0.0,0.0,0.0,0.0,0.0,0.0,0.0,0.0,0.0,0.0
MG: Ribosomal large subunit pseudouridine synthase D OS=Neisseria meningitidis serogroup B (strain MC58) GN=rluD PE=3 SV=1 [Q9K0B0] Score: 145.0	K06180	5.4.99.23	0.0,0.0,0.0,0.0,0.0,0.0,0.0,0.0,0.0,0.0,0.0,0.0,0.0,0.0,0.0,1.0,0.0,0.0,0.0,0.0,0.0,0.0,0.0,0.0,0.0,0.0,0.0,0.0,0.0,0.0,0.0,0.0,0.0,0.0,0.0,0.0,0.0,0.0,0.0,0.0,0.0,0.0,0.0,0.0
MG: Protein MTH_538 OS=Methanothermobacter thermautotrophicus (strain ATCC 29096 / DSM 1053 / JCM 10044 / NBRC 100330 / Delta H) GN=MTH_538 PE=1 SV=1 [O26638] Score: 48.5	UNKNOWN	UNKNOWN	0.0,0.0,0.0,2.0,0.0,0.0,0.0,0.0,0.0,0.0,0.0,0.0,0.0,0.0,0.0,0.0,0.0,0.0,0.0,0.0,0.0,0.0,0.0,0.0,0.0,0.0,0.0,0.0,0.0,0.0,0.0,0.0,0.0,0.0,0.0,0.0,0.0,0.0,0.0,0.0,0.0,0.0,0.0,0.0
MG: [FeFe] hydrogenase maturase subunit HydE OS=Thermotoga maritima (strain ATCC 43589 / MSB8 / DSM 3109 / JCM 10099) GN=TM_1269 PE=1 SV=1 [Q9X0Z6] Score: 281.0	K01012	1.8.-.-	0.0,0.0,0.0,0.0,0.0,1.0,0.0,1.0,0.0,0.0,1.0,0.0,4.0,5.0,3.0,2.0,1.0,1.0,1.0,0.0,0.0,1.0,1.0,1.0,0.0,0.0,0.0,0.0,0.0,1.0,0.0,0.0,0.0,0.0,0.0,0.0,0.0,0.0,0.0,0.0,0.0,0.0,0.0,0.0
MG: Lon protease OS=Desulfotomaculum reducens (strain MI-1) GN=lon PE=3 SV=1 [A4J7L6] Score: 1063.0	K01338	3.4.21.53	0.0,0.0,0.0,0.0,2.0,0.0,0.0,0.0,4.0,6.0,1.0,0.0,1.0,0.0,4.0,1.0,1.0,0.0,0.0,0.0,1.0,0.0,0.0,0.0,0.0,3.0,0.0,1.0,0.0,2.0,0.0,0.0,0.0,0.0,0.0,0.0,0.0,0.0,1.0,3.0,0.0,0.0,3.0,0.0
MURI_MYCA1 Glutamate racemase OS=Mycobacterium avium (strain 104) GN=murI PE=3 SV=1	K01776	5.1.1.3	0.0,0.0,0.0,0.0,0.0,0.0,0.0,0.0,0.0,0.0,0.0,0.0,0.0,0.0,0.0,0.0,0.0,0.0,0.0,0.0,0.0,0.0,0.0,0.0,0.0,0.0,0.0,0.0,0.0,0.0,0.0,0.0,0.0,0.0,1.0,0.0,0.0,0.0,0.0,0.0,0.0,0.0,0.0,0.0
BTBDJ_HUMAN BTB/POZ domain-containing protein 19 OS=Homo sapiens GN=BTBD19 PE=2 SV=1	UNKNOWN	UNKNOWN	0.0,0.0,0.0,0.0,1.0,1.0,2.0,0.0,1.0,0.0,1.0,0.0,0.0,1.0,0.0,0.0,0.0,0.0,0.0,0.0,0.0,0.0,0.0,1.0,0.0,2.0,2.0,1.0,1.0,2.0,3.0,0.0,2.0,0.0,3.0,4.0,0.0,1.0,2.0,1.0,0.0,0.0,0.0,0.0
MG: Levanase OS=Bacillus subtilis (strain 168) GN=sacC PE=1 SV=1 [P05656] Score: 147.0	K03332	3.2.1.80	0.0,0.0,0.0,0.0,0.0,0.0,0.0,0.0,0.0,0.0,0.0,0.0,0.0,0.0,0.0,0.0,0.0,0.0,0.0,0.0,0.0,0.0,0.0,0.0,0.0,0.0,0.0,0.0,0.0,0.0,0.0,0.0,1.0,0.0,0.0,0.0,0.0,1.0,0.0,0.0,0.0,0.0,0.0,1.0
OTC_CENSY Ornithine carbamoyltransferase OS=Cenarchaeum symbiosum (strain A) GN=argF PE=3 SV=1	K00611	2.1.3.3	0.0,0.0,0.0,0.0,0.0,0.0,0.0,0.0,0.0,0.0,0.0,0.0,0.0,0.0,0.0,0.0,0.0,0.0,1.0,0.0,0.0,0.0,0.0,0.0,0.0,0.0,0.0,0.0,0.0,0.0,0.0,0.0,0.0,0.0,0.0,0.0,0.0,0.0,0.0,0.0,0.0,0.0,0.0,0.0
MG: Putative colanic acid biosynthesis glycosyltransferase WcaL OS=Salmonella typhimurium (strain LT2 / SGSC1412 / ATCC 700720) GN=wcaL PE=3 SV=1 [P26388] Score: 87.0	K16703	2.4.-.-	0.0,0.0,0.0,0.0,0.0,0.0,0.0,0.0,0.0,0.0,0.0,0.0,0.0,0.0,0.0,0.0,0.0,0.0,0.0,0.0,0.0,0.0,0.0,0.0,0.0,0.0,0.0,0.0,0.0,0.0,0.0,0.0,0.0,0.0,0.0,1.0,0.0,0.0,0.0,0.0,0.0,0.0,0.0,0.0
RS17_GEOKA 30S ribosomal protein S17 OS=Geobacillus kaustophilus (strain HTA426) GN=rpsQ PE=3 SV=1	K02961	UNKNOWN	0.0,1.0,0.0,0.0,0.0,0.0,0.0,0.0,0.0,0.0,0.0,0.0,0.0,0.0,0.0,0.0,0.0,0.0,0.0,0.0,0.0,0.0,0.0,0.0,0.0,0.0,0.0,0.0,0.0,0.0,0.0,0.0,0.0,0.0,0.0,0.0,0.0,0.0,0.0,0.0,0.0,0.0,0.0,0.0
MG: DNA mismatch repair protein MutL OS=Syntrophomonas wolfei subsp. wolfei (strain DSM 2245B / Goettingen) GN=mutL PE=3 SV=1 [Q0AYB2] Score: 408.0	K03572	UNKNOWN	0.0,0.0,0.0,0.0,0.0,0.0,0.0,0.0,0.0,0.0,0.0,0.0,0.0,0.0,0.0,0.0,0.0,0.0,0.0,0.0,0.0,0.0,0.0,0.0,0.0,0.0,1.0,0.0,0.0,0.0,0.0,0.0,0.0,0.0,0.0,0.0,0.0,0.0,0.0,0.0,0.0,0.0,0.0,0.0
MG: Sugar fermentation stimulation protein homolog OS=Alkaliphilus oremlandii (strain OhILAs) GN=sfsA PE=3 SV=1 [A8MKA7] Score: 347.0	K06206	UNKNOWN	0.0,0.0,0.0,0.0,0.0,0.0,0.0,1.0,1.0,0.0,0.0,0.0,0.0,0.0,0.0,0.0,0.0,0.0,0.0,0.0,0.0,0.0,0.0,0.0,0.0,0.0,0.0,0.0,0.0,0.0,0.0,0.0,0.0,0.0,0.0,0.0,1.0,0.0,0.0,0.0,0.0,0.0,1.0,0.0
MG: HTH-type transcriptional repressor YvoA OS=Bacillus subtilis (strain 168) GN=yvoA PE=1 SV=1 [O34817] Score: 118.0	K03710	UNKNOWN	0.0,0.0,0.0,0.0,0.0,0.0,0.0,0.0,0.0,0.0,0.0,0.0,4.0,1.0,0.0,2.0,3.0,0.0,0.0,1.0,0.0,0.0,0.0,0.0,0.0,0.0,0.0,0.0,0.0,0.0,0.0,0.0,0.0,0.0,0.0,0.0,0.0,0.0,0.0,0.0,0.0,0.0,0.0,0.0
MG: Uncharacterized N-acetyltransferase YhhY OS=Escherichia coli (strain K12) GN=yhhY PE=3 SV=1 [P46854] Score: 59.3	K03825	2.3.1.-	0.0,0.0,0.0,0.0,0.0,0.0,0.0,0.0,0.0,0.0,0.0,0.0,0.0,0.0,0.0,0.0,0.0,0.0,0.0,0.0,0.0,0.0,0.0,0.0,0.0,0.0,0.0,0.0,0.0,0.0,0.0,0.0,0.0,0.0,0.0,0.0,0.0,0.0,1.0,1.0,0.0,0.0,0.0,0.0
RAA5C_ARATH Ras-related protein RABA5c OS=Arabidopsis thaliana GN=RABA5C PE=1 SV=1	UNKNOWN	UNKNOWN	0.0,0.0,0.0,0.0,0.0,0.0,0.0,0.0,0.0,0.0,0.0,0.0,0.0,0.0,0.0,0.0,0.0,0.0,0.0,0.0,0.0,0.0,0.0,0.0,0.0,0.0,0.0,0.0,0.0,0.0,0.0,0.0,0.0,0.0,0.0,0.0,0.0,0.0,0.0,0.0,0.0,0.0,0.0,2.0
MG: Protein TabA OS=Pseudomonas amygdali pv. tabaci GN=tabA PE=3 SV=1 [P31851] Score: 313.0	K19108	UNKNOWN	0.0,0.0,0.0,0.0,0.0,0.0,0.0,0.0,1.0,0.0,0.0,0.0,0.0,0.0,0.0,0.0,0.0,0.0,0.0,0.0,0.0,0.0,0.0,0.0,0.0,0.0,0.0,0.0,0.0,0.0,0.0,0.0,0.0,0.0,0.0,0.0,0.0,0.0,0.0,0.0,0.0,0.0,0.0,0.0
RS8_GRIJA 40S ribosomal protein S8 OS=Griffithsia japonica GN=RPS8 PE=2 SV=1	UNKNOWN	UNKNOWN	0.0,0.0,0.0,0.0,0.0,0.0,0.0,0.0,0.0,0.0,0.0,0.0,0.0,0.0,0.0,0.0,0.0,0.0,0.0,0.0,0.0,0.0,0.0,0.0,0.0,0.0,0.0,0.0,0.0,0.0,0.0,0.0,0.0,0.0,0.0,0.0,0.0,0.0,0.0,0.0,0.0,0.0,0.0,1.0
ACKA_SHELP Acetate kinase OS=Shewanella loihica (strain ATCC BAA-1088 / PV-4) GN=ackA PE=3 SV=1	K00925	2.7.2.1	0.0,0.0,0.0,0.0,0.0,0.0,0.0,0.0,0.0,0.0,0.0,0.0,0.0,0.0,0.0,0.0,0.0,0.0,0.0,0.0,0.0,0.0,0.0,0.0,0.0,0.0,4.0,0.0,0.0,0.0,0.0,0.0,6.0,8.0,15.0,20.0,0.0,0.0,0.0,0.0,0.0,0.0,0.0,0.0
DEF_RHOP5 Peptide deformylase OS=Rhodopseudomonas palustris (strain BisA53) GN=def PE=3 SV=1	K01462	3.5.1.88	0.0,0.0,0.0,0.0,0.0,0.0,0.0,0.0,0.0,0.0,0.0,0.0,0.0,0.0,0.0,0.0,1.0,0.0,0.0,0.0,0.0,0.0,0.0,0.0,0.0,0.0,0.0,0.0,0.0,0.0,0.0,0.0,0.0,0.0,0.0,0.0,0.0,0.0,0.0,0.0,0.0,0.0,0.0,0.0
SYV_SHIFL Valine--tRNA ligase OS=Shigella flexneri GN=valS PE=3 SV=1	K01873	6.1.1.9	0.0,0.0,0.0,0.0,0.0,0.0,0.0,0.0,0.0,0.0,0.0,0.0,0.0,0.0,0.0,0.0,0.0,0.0,0.0,0.0,0.0,0.0,0.0,0.0,0.0,0.0,0.0,0.0,0.0,0.0,0.0,0.0,0.0,0.0,0.0,0.0,0.0,0.0,0.0,0.0,0.0,0.0,3.0,0.0
MG: Redox-sensing transcriptional repressor Rex OS=Clostridium perfringens (strain SM101 / Type A) GN=rex PE=3 SV=1 [Q0SQP4] Score: 258.0	K01926	UNKNOWN	0.0,0.0,0.0,0.0,0.0,0.0,0.0,0.0,0.0,0.0,0.0,0.0,0.0,0.0,0.0,0.0,0.0,0.0,0.0,0.0,0.0,0.0,0.0,0.0,0.0,1.0,0.0,2.0,0.0,0.0,0.0,0.0,0.0,0.0,0.0,0.0,2.0,0.0,0.0,0.0,0.0,0.0,0.0,0.0
YGFZ_YERP3 tRNA-modifying protein YgfZ OS=Yersinia pseudotuberculosis serotype O:1b (strain IP 31758) GN=YpsIP31758_0872 PE=3 SV=1	K06980	UNKNOWN	0.0,0.0,0.0,0.0,0.0,0.0,0.0,0.0,0.0,0.0,0.0,0.0,1.0,0.0,0.0,0.0,0.0,0.0,0.0,0.0,0.0,0.0,0.0,0.0,0.0,0.0,0.0,0.0,0.0,0.0,0.0,0.0,0.0,0.0,0.0,0.0,0.0,0.0,0.0,0.0,0.0,0.0,8.0,0.0
H2A1H_HUMAN Histone H2A type 1-H OS=Homo sapiens GN=HIST1H2AH PE=1 SV=3	K11251	UNKNOWN	3.0,0.0,0.0,0.0,0.0,0.0,0.0,3.0,0.0,0.0,1.0,0.0,0.0,0.0,0.0,0.0,0.0,0.0,0.0,0.0,3.0,2.0,1.0,0.0,0.0,0.0,0.0,0.0,3.0,3.0,0.0,0.0,0.0,0.0,0.0,0.0,0.0,0.0,3.0,4.0,0.0,0.0,3.0,0.0
MG: Uncharacterized HTH-type transcriptional regulator MJ0586 OS=Methanocaldococcus jannaschii (strain ATCC 43067 / DSM 2661 / JAL-1 / JCM 10045 / NBRC 100440) GN=MJ0586 PE=3 SV=1 [Q58006] Score: 68.9	K03627	UNKNOWN	0.0,0.0,0.0,0.0,2.0,2.0,0.0,1.0,0.0,0.0,0.0,0.0,0.0,0.0,0.0,0.0,0.0,0.0,0.0,0.0,0.0,0.0,0.0,0.0,7.0,2.0,0.0,0.0,0.0,0.0,0.0,0.0,0.0,0.0,0.0,0.0,0.0,0.0,7.0,8.0,0.0,0.0,0.0,0.0
MG: Periplasmic beta-glucosidase/beta-xylosidase OS=Dickeya chrysanthemi GN=bgxA PE=3 SV=1 [Q46684] Score: 132.0	UNKNOWN	3.2.1.37,3.2.1.21	1.0,1.0,4.0,7.0,8.0,7.0,7.0,4.0,1.0,0.0,0.0,0.0,0.0,1.0,1.0,0.0,1.0,1.0,0.0,0.0,1.0,0.0,0.0,0.0,2.0,2.0,1.0,1.0,0.0,0.0,1.0,0.0,2.0,2.0,0.0,0.0,1.0,0.0,8.0,1.0,3.0,1.0,0.0,0.0
MG: Transcriptional repressor tup12 OS=Schizosaccharomyces pombe (strain 972 / ATCC 24843) GN=tup12 PE=1 SV=2 [Q9UUG8] Score: 75.1	K06666	UNKNOWN	0.0,0.0,0.0,0.0,0.0,0.0,0.0,0.0,0.0,0.0,0.0,0.0,0.0,0.0,0.0,0.0,0.0,0.0,0.0,0.0,0.0,0.0,0.0,0.0,0.0,0.0,0.0,0.0,0.0,0.0,0.0,0.0,0.0,0.0,0.0,0.0,0.0,0.0,0.0,0.0,0.0,0.0,0.0,1.0
ALMT6_ARATH Aluminum-activated malate transporter 6 OS=Arabidopsis thaliana GN=ALMT6 PE=3 SV=1	UNKNOWN	UNKNOWN	0.0,0.0,0.0,0.0,0.0,0.0,0.0,0.0,0.0,0.0,0.0,0.0,0.0,0.0,0.0,0.0,0.0,0.0,0.0,0.0,0.0,0.0,0.0,0.0,0.0,0.0,0.0,0.0,0.0,0.0,0.0,0.0,0.0,0.0,0.0,0.0,0.0,0.0,0.0,0.0,1.0,0.0,0.0,0.0
MG: Putative glycosyltransferase HI_0258 OS=Haemophilus influenzae (strain ATCC 51907 / DSM 11121 / KW20 / Rd) GN=HI_0258 PE=3 SV=2 [P43974] Score: 100.0	UNKNOWN	2.-.-.-	0.0,0.0,0.0,0.0,1.0,0.0,0.0,0.0,1.0,1.0,1.0,2.0,2.0,0.0,2.0,0.0,2.0,2.0,2.0,0.0,0.0,0.0,0.0,1.0,0.0,0.0,0.0,0.0,0.0,0.0,0.0,0.0,0.0,0.0,0.0,0.0,0.0,0.0,0.0,1.0,0.0,0.0,0.0,0.0
SYNPR_RAT Synaptoporin OS=Rattus norvegicus GN=Synpr PE=1 SV=2	UNKNOWN	UNKNOWN	0.0,0.0,0.0,0.0,0.0,0.0,0.0,0.0,0.0,0.0,0.0,0.0,0.0,0.0,0.0,0.0,0.0,0.0,0.0,0.0,0.0,0.0,0.0,0.0,0.0,0.0,0.0,0.0,0.0,0.0,1.0,0.0,0.0,0.0,0.0,0.0,0.0,0.0,0.0,0.0,0.0,0.0,0.0,0.0
K1C12_HUMAN Keratin, type I cytoskeletal 12 OS=Homo sapiens GN=KRT12 PE=1 SV=1	K07604	UNKNOWN	242.0,188.0,172.0,332.0,199.0,104.0,161.0,334.0,244.0,197.0,640.0,439.0,202.0,191.0,175.0,36.0,92.0,76.0,22.0,66.0,288.0,250.0,711.0,133.0,262.0,326.0,230.0,843.0,499.0,774.0,387.0,361.0,369.0,517.0,503.0,505.0,523.0,594.0,124.0,127.0,298.0,187.0,311.0,91.0
FZL_ARATH Probable transmembrane GTPase FZO-like, chloroplastic OS=Arabidopsis thaliana GN=FZL PE=1 SV=1	UNKNOWN	3.6.5.-	0.0,0.0,0.0,0.0,0.0,0.0,0.0,0.0,0.0,0.0,0.0,0.0,0.0,0.0,0.0,0.0,0.0,0.0,0.0,0.0,0.0,0.0,0.0,0.0,0.0,0.0,0.0,0.0,0.0,0.0,0.0,0.0,0.0,0.0,0.0,0.0,0.0,0.0,0.0,2.0,0.0,0.0,0.0,0.0
MG: Transcription termination/antitermination protein NusG OS=Treponema pallidum (strain Nichols) GN=nusG PE=3 SV=1 [O83264] Score: 186.0	K02601	UNKNOWN	0.0,0.0,0.0,0.0,0.0,0.0,0.0,0.0,0.0,0.0,0.0,0.0,0.0,0.0,0.0,0.0,0.0,0.0,0.0,0.0,0.0,0.0,0.0,0.0,0.0,0.0,0.0,0.0,0.0,0.0,0.0,0.0,0.0,0.0,0.0,1.0,0.0,0.0,0.0,0.0,0.0,0.0,0.0,0.0
MG: Sec-independent protein translocase protein TatA OS=Trichodesmium erythraeum (strain IMS101) GN=tatA PE=3 SV=1 [Q110N2] Score: 54.3	K03116	UNKNOWN	0.0,0.0,0.0,0.0,2.0,0.0,0.0,0.0,0.0,0.0,0.0,0.0,0.0,0.0,0.0,0.0,0.0,0.0,0.0,0.0,0.0,0.0,0.0,0.0,0.0,0.0,0.0,0.0,0.0,0.0,0.0,0.0,0.0,0.0,0.0,0.0,0.0,0.0,0.0,0.0,0.0,0.0,0.0,0.0
MG: Bifunctional NAD(P)H-hydrate repair enzyme Nnr OS=Korarchaeum cryptofilum (strain OPF8) GN=nnr PE=3 SV=1 [B1L3W1] Score: 271.0	K17759,K17758	5.1.99.6,4.2.1.136	0.0,0.0,0.0,0.0,0.0,1.0,1.0,0.0,0.0,0.0,0.0,0.0,3.0,2.0,5.0,4.0,2.0,3.0,3.0,0.0,0.0,0.0,0.0,1.0,0.0,0.0,0.0,0.0,0.0,0.0,0.0,0.0,0.0,0.0,0.0,0.0,0.0,0.0,0.0,0.0,0.0,0.0,0.0,0.0
PYRK_BACP2 Dihydroorotate dehydrogenase B (NAD(+)), electron transfer subunit OS=Bacillus pumilus (strain SAFR-032) GN=pyrK PE=3 SV=1	K02823	UNKNOWN	0.0,0.0,0.0,0.0,0.0,0.0,0.0,0.0,0.0,0.0,0.0,0.0,0.0,0.0,0.0,0.0,0.0,1.0,0.0,0.0,0.0,0.0,0.0,0.0,0.0,0.0,0.0,0.0,0.0,0.0,0.0,0.0,0.0,0.0,0.0,0.0,0.0,0.0,0.0,0.0,0.0,0.0,0.0,0.0
SYV_NITSB Valine--tRNA ligase OS=Nitratiruptor sp. (strain SB155-2) GN=valS PE=3 SV=1	K01873	6.1.1.9	0.0,0.0,0.0,0.0,0.0,0.0,0.0,0.0,0.0,0.0,0.0,0.0,0.0,0.0,0.0,0.0,0.0,0.0,0.0,0.0,0.0,0.0,0.0,0.0,0.0,1.0,0.0,0.0,0.0,0.0,0.0,0.0,0.0,0.0,0.0,0.0,0.0,0.0,0.0,0.0,0.0,0.0,0.0,0.0
MG: Translation initiation factor IF-2 OS=Parabacteroides distasonis (strain ATCC 8503 / DSM 20701 / NCTC 11152) GN=infB PE=3 SV=1 [A6LHS1] Score: 751.0	K02519	UNKNOWN	0.0,0.0,0.0,0.0,0.0,0.0,0.0,0.0,0.0,0.0,0.0,0.0,0.0,0.0,0.0,0.0,0.0,0.0,0.0,0.0,0.0,0.0,0.0,0.0,0.0,0.0,0.0,0.0,0.0,0.0,0.0,0.0,0.0,0.0,0.0,0.0,0.0,0.0,0.0,0.0,0.0,0.0,5.0,0.0
MAN1_HUMAN Inner nuclear membrane protein Man1 OS=Homo sapiens GN=LEMD3 PE=1 SV=2	K19410	UNKNOWN	0.0,0.0,0.0,0.0,0.0,0.0,0.0,0.0,0.0,0.0,0.0,0.0,0.0,0.0,0.0,0.0,0.0,0.0,0.0,0.0,0.0,0.0,0.0,1.0,0.0,0.0,0.0,0.0,0.0,0.0,0.0,0.0,0.0,0.0,0.0,0.0,0.0,0.0,0.0,0.0,0.0,0.0,0.0,0.0
MG: Ribosome-recycling factor OS=Desulfovibrio vulgaris subsp. vulgaris (strain DP4) GN=frr PE=3 SV=1 [A1VFB2] Score: 217.0	K02838	UNKNOWN	0.0,0.0,1.0,0.0,9.0,5.0,2.0,1.0,4.0,11.0,4.0,3.0,8.0,5.0,3.0,0.0,1.0,5.0,0.0,0.0,0.0,0.0,0.0,2.0,1.0,0.0,0.0,0.0,7.0,0.0,0.0,0.0,0.0,1.0,4.0,3.0,4.0,0.0,0.0,2.0,0.0,0.0,2.0,3.0
MG: Putative ring-cleaving dioxygenase MhqA OS=Bacillus subtilis (strain 168) GN=mhqA PE=2 SV=1 [O34689] Score: 260.0	K15975	1.13.11.-	0.0,0.0,0.0,0.0,0.0,0.0,0.0,0.0,0.0,0.0,0.0,0.0,0.0,0.0,0.0,0.0,0.0,0.0,0.0,0.0,0.0,1.0,0.0,0.0,0.0,0.0,0.0,0.0,0.0,0.0,0.0,0.0,0.0,0.0,0.0,0.0,0.0,0.0,0.0,0.0,0.0,0.0,0.0,0.0
MG: Carbonic anhydrase 1 OS=Escherichia coli (strain K12) GN=cynT PE=1 SV=1 [P0ABE9] Score: 124.0	K01673	4.2.1.1	0.0,0.0,0.0,0.0,6.0,4.0,7.0,4.0,7.0,6.0,0.0,1.0,2.0,4.0,4.0,2.0,4.0,2.0,0.0,1.0,0.0,0.0,1.0,1.0,3.0,1.0,0.0,0.0,0.0,0.0,0.0,0.0,0.0,0.0,0.0,0.0,0.0,0.0,64.0,64.0,0.0,0.0,0.0,0.0
MNHD2_STAHJ Putative antiporter subunit mnhD2 OS=Staphylococcus haemolyticus (strain JCSC1435) GN=mnhD2 PE=3 SV=1	K05568	UNKNOWN	0.0,0.0,0.0,0.0,0.0,0.0,0.0,0.0,0.0,0.0,0.0,0.0,0.0,0.0,0.0,0.0,0.0,0.0,0.0,0.0,0.0,0.0,0.0,0.0,0.0,0.0,0.0,0.0,0.0,0.0,0.0,0.0,0.0,0.0,0.0,0.0,0.0,0.0,0.0,0.0,0.0,0.0,1.0,0.0
MG: Probable transcriptional regulatory protein MADE_1004275 OS=Alteromonas macleodii (strain DSM 17117 / Deep ecotype) GN=MADE_1004275 PE=3 SV=1 [B4RWE1] Score: 255.0	UNKNOWN	UNKNOWN	0.0,0.0,0.0,0.0,0.0,0.0,0.0,0.0,0.0,0.0,0.0,1.0,0.0,0.0,0.0,0.0,0.0,0.0,0.0,0.0,0.0,0.0,0.0,0.0,0.0,0.0,0.0,0.0,0.0,0.0,0.0,0.0,0.0,0.0,0.0,0.0,0.0,0.0,0.0,0.0,0.0,1.0,0.0,0.0
GATB_LACTC Glutamyl-tRNA(Gln) amidotransferase subunit B, mitochondrial OS=Lachancea thermotolerans (strain ATCC 56472 / CBS 6340 / NRRL Y-8284) GN=PET112 PE=3 SV=1	K02434	6.3.5.-	0.0,0.0,0.0,0.0,0.0,0.0,0.0,0.0,0.0,0.0,0.0,0.0,3.0,0.0,0.0,1.0,0.0,0.0,0.0,0.0,0.0,0.0,0.0,0.0,0.0,0.0,0.0,0.0,0.0,0.0,0.0,0.0,0.0,0.0,0.0,0.0,0.0,0.0,0.0,0.0,0.0,0.0,0.0,0.0
RSMG1_SYNFM Ribosomal RNA small subunit methyltransferase G 1 OS=Syntrophobacter fumaroxidans (strain DSM 10017 / MPOB) GN=rsmG1 PE=3 SV=1	K03501	2.1.1.170	0.0,0.0,0.0,0.0,0.0,0.0,0.0,0.0,0.0,0.0,0.0,0.0,0.0,0.0,0.0,0.0,0.0,0.0,0.0,0.0,0.0,0.0,0.0,0.0,0.0,0.0,0.0,0.0,0.0,0.0,0.0,0.0,0.0,0.0,0.0,0.0,0.0,0.0,0.0,0.0,1.0,0.0,0.0,0.0
THIO_RAT Thioredoxin OS=Rattus norvegicus GN=Txn PE=1 SV=2	K03671	UNKNOWN	0.0,0.0,0.0,0.0,0.0,0.0,0.0,0.0,0.0,0.0,0.0,0.0,0.0,1.0,0.0,0.0,0.0,0.0,0.0,0.0,0.0,0.0,0.0,0.0,0.0,0.0,0.0,0.0,0.0,0.0,0.0,0.0,0.0,0.0,0.0,0.0,0.0,0.0,0.0,0.0,0.0,0.0,0.0,0.0
MG: UDP-glucose 4-epimerase OS=Streptococcus mutans serotype c (strain ATCC 700610 / UA159) GN=galE PE=3 SV=2 [P96995] Score: 363.0	K01784	5.1.3.2	0.0,0.0,4.0,7.0,0.0,0.0,0.0,0.0,0.0,0.0,0.0,0.0,0.0,0.0,0.0,1.0,0.0,0.0,0.0,0.0,0.0,0.0,0.0,0.0,0.0,0.0,0.0,0.0,0.0,0.0,0.0,0.0,0.0,0.0,0.0,0.0,0.0,0.0,0.0,0.0,0.0,0.0,0.0,0.0
FCHO1_MOUSE F-BAR domain only protein 1 OS=Mus musculus GN=Fcho1 PE=1 SV=2	K20042	UNKNOWN	0.0,0.0,0.0,0.0,0.0,0.0,0.0,0.0,0.0,0.0,0.0,0.0,0.0,0.0,0.0,0.0,0.0,0.0,0.0,0.0,0.0,0.0,0.0,0.0,0.0,0.0,0.0,0.0,0.0,0.0,0.0,0.0,0.0,0.0,0.0,0.0,2.0,0.0,0.0,0.0,0.0,0.0,0.0,0.0
ATPB_PEPNI ATP synthase subunit beta (Fragment) OS=Peptococcus niger GN=atpD PE=3 SV=1	UNKNOWN	3.6.3.14	2.0,2.0,40.0,44.0,28.0,33.0,94.0,53.0,27.0,27.0,25.0,27.0,6.0,8.0,7.0,6.0,7.0,9.0,1.0,4.0,37.0,39.0,37.0,35.0,15.0,7.0,13.0,10.0,44.0,48.0,28.0,27.0,17.0,17.0,26.0,20.0,33.0,34.0,40.0,48.0,14.0,17.0,17.0,29.0
MG: Phosphoribosylformylglycinamidine synthase subunit PurL OS=Anaeromyxobacter sp. (strain K) GN=purL PE=3 SV=1 [B4UIX7] Score: 558.0	K01952	6.3.5.3	0.0,0.0,0.0,0.0,0.0,0.0,0.0,0.0,0.0,0.0,0.0,0.0,0.0,0.0,1.0,0.0,0.0,3.0,0.0,0.0,0.0,0.0,0.0,0.0,0.0,0.0,1.0,0.0,0.0,0.0,0.0,0.0,0.0,0.0,0.0,0.0,0.0,0.0,0.0,0.0,0.0,0.0,0.0,0.0
MG: Transketolase-like protein 2 OS=Mus musculus GN=Tktl2 PE=2 SV=1 [Q9D4D4] Score: 315.0	K00615	2.2.1.1	0.0,0.0,0.0,0.0,0.0,0.0,0.0,0.0,0.0,0.0,0.0,0.0,0.0,1.0,0.0,0.0,0.0,0.0,0.0,0.0,0.0,0.0,0.0,0.0,0.0,0.0,0.0,0.0,0.0,0.0,0.0,0.0,0.0,0.0,0.0,0.0,0.0,0.0,0.0,0.0,0.0,0.0,0.0,0.0
AMI4_MYCTO Putative amidase AmiD OS=Mycobacterium tuberculosis (strain CDC 1551 / Oshkosh) GN=amiD PE=3 SV=1	K01426	3.5.1.4	0.0,0.0,0.0,0.0,0.0,0.0,0.0,0.0,0.0,0.0,0.0,0.0,0.0,0.0,0.0,0.0,0.0,1.0,0.0,0.0,0.0,0.0,0.0,0.0,0.0,0.0,0.0,0.0,0.0,0.0,0.0,0.0,0.0,0.0,0.0,0.0,0.0,0.0,0.0,0.0,0.0,0.0,0.0,0.0
H2A3_WHEAT Histone H2A.2.2 OS=Triticum aestivum PE=1 SV=1	UNKNOWN	UNKNOWN	3.0,0.0,0.0,0.0,0.0,0.0,0.0,3.0,0.0,0.0,0.0,0.0,0.0,0.0,0.0,0.0,0.0,0.0,0.0,0.0,3.0,2.0,1.0,0.0,0.0,0.0,0.0,0.0,3.0,3.0,0.0,0.0,0.0,0.0,0.0,0.0,0.0,0.0,3.0,4.0,0.0,0.0,3.0,0.0
CDPKI_ARATH Calcium-dependent protein kinase 18 OS=Arabidopsis thaliana GN=CPK18 PE=2 SV=1	K13412	2.7.11.1	0.0,0.0,0.0,0.0,0.0,0.0,0.0,0.0,0.0,0.0,0.0,1.0,0.0,0.0,0.0,0.0,0.0,0.0,0.0,0.0,0.0,0.0,0.0,0.0,0.0,0.0,0.0,0.0,0.0,0.0,0.0,0.0,0.0,0.0,0.0,0.0,0.0,0.0,0.0,0.0,0.0,0.0,0.0,0.0
CLPC_ODOSI ATP-dependent Clp protease ATP-binding subunit clpA homolog OS=Odontella sinensis GN=clpC PE=3 SV=1	UNKNOWN	UNKNOWN	2.0,2.0,6.0,6.0,4.0,6.0,0.0,0.0,0.0,0.0,0.0,0.0,5.0,1.0,4.0,3.0,5.0,6.0,2.0,0.0,1.0,0.0,0.0,0.0,15.0,16.0,8.0,3.0,0.0,1.0,0.0,0.0,0.0,1.0,0.0,2.0,1.0,2.0,5.0,5.0,0.0,0.0,0.0,0.0
MG: Chorismate mutase OS=Methanocaldococcus jannaschii (strain ATCC 43067 / DSM 2661 / JAL-1 / JCM 10045 / NBRC 100440) GN=aroQ PE=1 SV=1 [Q57696] Score: 53.9	K04093	5.4.99.5	0.0,0.0,0.0,0.0,0.0,0.0,0.0,0.0,1.0,1.0,0.0,0.0,0.0,0.0,0.0,0.0,0.0,0.0,0.0,0.0,0.0,0.0,0.0,0.0,0.0,0.0,0.0,0.0,0.0,0.0,0.0,0.0,0.0,0.0,0.0,0.0,0.0,0.0,0.0,1.0,0.0,0.0,0.0,0.0
MG: 4-hydroxy-tetrahydrodipicolinate synthase OS=Parabacteroides distasonis (strain ATCC 8503 / DSM 20701 / NCTC 11152) GN=dapA PE=3 SV=1 [A6LA57] Score: 281.0	K01714	4.3.3.7	5.0,3.0,3.0,4.0,3.0,0.0,0.0,2.0,0.0,0.0,1.0,0.0,0.0,0.0,0.0,0.0,0.0,0.0,0.0,0.0,2.0,5.0,6.0,8.0,0.0,0.0,0.0,0.0,8.0,2.0,1.0,0.0,0.0,0.0,0.0,0.0,0.0,0.0,0.0,0.0,0.0,0.0,0.0,0.0
MG: Hydroxysteroid dehydrogenase-like protein 2 OS=Mus musculus GN=Hsdl2 PE=1 SV=1 [Q2TPA8] Score: 43.5	UNKNOWN	1.-.-.-	0.0,0.0,0.0,0.0,2.0,2.0,11.0,7.0,46.0,44.0,48.0,40.0,22.0,7.0,7.0,9.0,20.0,9.0,3.0,9.0,46.0,41.0,51.0,47.0,43.0,102.0,64.0,74.0,17.0,15.0,16.0,16.0,7.0,6.0,22.0,16.0,8.0,10.0,26.0,26.0,0.0,0.0,0.0,0.0
MG: Elongation factor P OS=Moorella thermoacetica (strain ATCC 39073) GN=efp PE=3 SV=1 [Q2RI92] Score: 297.0	K02356	UNKNOWN	0.0,0.0,0.0,1.0,0.0,0.0,0.0,0.0,0.0,0.0,1.0,0.0,5.0,0.0,1.0,0.0,1.0,1.0,0.0,0.0,0.0,1.0,0.0,0.0,0.0,0.0,0.0,0.0,0.0,0.0,0.0,0.0,0.0,0.0,0.0,0.0,1.0,0.0,0.0,0.0,0.0,0.0,0.0,0.0
MG: 50S ribosomal protein L13 OS=Lactobacillus acidophilus (strain ATCC 700396 / NCK56 / N2 / NCFM) GN=rplM PE=3 SV=1 [Q5FM59] Score: 105.0	K02871	UNKNOWN	0.0,0.0,0.0,0.0,0.0,0.0,0.0,0.0,0.0,0.0,0.0,0.0,10.0,1.0,0.0,1.0,10.0,0.0,0.0,1.0,0.0,0.0,1.0,0.0,0.0,0.0,0.0,0.0,0.0,0.0,0.0,0.0,0.0,0.0,0.0,0.0,0.0,0.0,0.0,0.0,0.0,0.0,0.0,0.0
MG: Gellan lyase OS=Bacillus sp. PE=1 SV=1 [O82833] Score: 51.2	UNKNOWN	4.2.2.25	12.0,5.0,13.0,1.0,10.0,16.0,8.0,1.0,35.0,27.0,27.0,34.0,13.0,19.0,15.0,23.0,19.0,11.0,23.0,38.0,0.0,2.0,2.0,3.0,2.0,0.0,1.0,0.0,1.0,0.0,2.0,8.0,13.0,13.0,18.0,13.0,4.0,3.0,10.0,13.0,0.0,0.0,5.0,8.0
MG: DNA polymerase I OS=Mycobacterium leprae (strain TN) GN=polA PE=3 SV=1 [P46835] Score: 134.0	K02335	2.7.7.7	0.0,1.0,0.0,0.0,0.0,0.0,0.0,0.0,0.0,0.0,0.0,0.0,0.0,0.0,0.0,0.0,0.0,0.0,0.0,0.0,0.0,0.0,0.0,0.0,0.0,0.0,0.0,0.0,0.0,0.0,0.0,0.0,0.0,0.0,0.0,0.0,0.0,0.0,0.0,0.0,0.0,0.0,0.0,0.0
MG: Putative oxidoreductase SadH OS=Mycobacterium tuberculosis (strain ATCC 25618 / H37Rv) GN=sadH PE=2 SV=1 [P9WGP9] Score: 132.0	UNKNOWN	1.-.-.-	0.0,0.0,0.0,0.0,0.0,0.0,0.0,0.0,0.0,0.0,0.0,0.0,0.0,0.0,0.0,0.0,0.0,0.0,0.0,0.0,0.0,0.0,0.0,0.0,0.0,0.0,0.0,0.0,0.0,0.0,0.0,0.0,0.0,0.0,0.0,0.0,0.0,0.0,0.0,0.0,0.0,0.0,6.0,2.0
LEU1_GEOSE 2-isopropylmalate synthase OS=Geobacillus stearothermophilus GN=leuA PE=3 SV=1	UNKNOWN	2.3.3.13	0.0,0.0,0.0,0.0,0.0,1.0,0.0,0.0,0.0,0.0,0.0,0.0,1.0,0.0,0.0,0.0,0.0,0.0,0.0,1.0,0.0,0.0,0.0,0.0,4.0,8.0,2.0,2.0,0.0,0.0,0.0,0.0,0.0,0.0,0.0,0.0,0.0,0.0,0.0,0.0,0.0,0.0,0.0,0.0
MG: Uncharacterized protein TP_1014 OS=Treponema pallidum (strain Nichols) GN=TP_1014 PE=4 SV=1 [O83978] Score: 57.4	UNKNOWN	UNKNOWN	0.0,0.0,0.0,0.0,0.0,0.0,0.0,0.0,0.0,0.0,0.0,0.0,11.0,0.0,0.0,0.0,0.0,0.0,0.0,0.0,0.0,0.0,1.0,0.0,0.0,0.0,0.0,0.0,0.0,0.0,0.0,0.0,0.0,0.0,0.0,0.0,0.0,0.0,0.0,0.0,0.0,0.0,0.0,0.0
MG: Ribosome-binding ATPase YchF OS=Haemophilus ducreyi (strain 35000HP / ATCC 700724) GN=ychF PE=3 SV=3 [Q7VMI2] Score: 443.0	K06942	UNKNOWN	0.0,0.0,0.0,0.0,0.0,0.0,0.0,0.0,0.0,0.0,0.0,0.0,0.0,0.0,0.0,0.0,0.0,0.0,0.0,0.0,0.0,0.0,0.0,0.0,0.0,0.0,0.0,1.0,0.0,0.0,0.0,0.0,0.0,0.0,0.0,0.0,0.0,0.0,0.0,0.0,0.0,0.0,0.0,0.0
MG: Cell shape-determining protein MreC OS=Geobacillus stearothermophilus GN=mreC PE=3 SV=1 [P84480] Score: 89.7	UNKNOWN	UNKNOWN	0.0,0.0,0.0,0.0,0.0,0.0,0.0,0.0,0.0,0.0,0.0,0.0,15.0,2.0,10.0,5.0,7.0,0.0,0.0,0.0,1.0,1.0,1.0,0.0,0.0,0.0,0.0,0.0,0.0,0.0,0.0,0.0,0.0,0.0,0.0,0.0,0.0,0.0,0.0,0.0,1.0,0.0,0.0,0.0
ATG4_PENCW Probable cysteine protease atg4 OS=Penicillium chrysogenum (strain ATCC 28089 / DSM 1075 / Wisconsin 54-1255) GN=atg4 PE=3 SV=1	K08342	3.4.22.-	0.0,0.0,0.0,0.0,0.0,0.0,0.0,0.0,0.0,0.0,0.0,0.0,1.0,0.0,0.0,0.0,0.0,0.0,0.0,0.0,0.0,0.0,0.0,0.0,1.0,0.0,0.0,0.0,0.0,0.0,0.0,0.0,0.0,0.0,0.0,0.0,0.0,0.0,0.0,0.0,0.0,0.0,0.0,0.0
MG: Uncharacterized protein HI_0850 OS=Haemophilus influenzae (strain ATCC 51907 / DSM 11121 / KW20 / Rd) GN=HI_0850 PE=3 SV=1 [P44060] Score: 46.2	K03803	UNKNOWN	0.0,0.0,0.0,0.0,0.0,0.0,0.0,0.0,0.0,0.0,0.0,0.0,0.0,0.0,0.0,0.0,0.0,0.0,0.0,0.0,0.0,0.0,0.0,0.0,0.0,0.0,0.0,0.0,0.0,0.0,0.0,0.0,0.0,0.0,0.0,1.0,0.0,0.0,0.0,0.0,0.0,0.0,0.0,0.0
MG: Uncharacterized UDP-glucose epimerase YtcB OS=Bacillus subtilis (strain 168) GN=ytcB PE=3 SV=1 [O34886] Score: 67.8	UNKNOWN	4.-.-.-	0.0,0.0,0.0,0.0,0.0,0.0,0.0,0.0,0.0,0.0,0.0,0.0,0.0,0.0,0.0,0.0,0.0,0.0,0.0,0.0,0.0,0.0,0.0,0.0,0.0,0.0,0.0,0.0,0.0,0.0,1.0,0.0,0.0,0.0,0.0,0.0,0.0,0.0,0.0,0.0,0.0,0.0,0.0,0.0
MG: Tail tape measure protein gp18 OS=Bacillus phage SPP1 PE=4 SV=1 [Q0PDK7] Score: 104.0	UNKNOWN	UNKNOWN	0.0,0.0,0.0,0.0,1.0,1.0,0.0,0.0,0.0,0.0,0.0,0.0,0.0,0.0,0.0,0.0,0.0,0.0,0.0,0.0,0.0,0.0,0.0,0.0,1.0,0.0,0.0,0.0,0.0,0.0,0.0,0.0,0.0,0.0,0.0,0.0,0.0,0.0,0.0,0.0,0.0,0.0,0.0,0.0
MG: DegV domain-containing protein YitS OS=Bacillus subtilis (strain 168) GN=yitS PE=3 SV=1 [P70945] Score: 222.0	UNKNOWN	UNKNOWN	0.0,0.0,0.0,0.0,1.0,0.0,0.0,1.0,7.0,2.0,0.0,3.0,13.0,12.0,22.0,4.0,19.0,12.0,3.0,5.0,0.0,0.0,0.0,0.0,0.0,1.0,0.0,0.0,0.0,0.0,0.0,0.0,0.0,1.0,0.0,0.0,0.0,0.0,0.0,0.0,0.0,0.0,0.0,0.0
GLPK_HALMA Glycerol kinase OS=Haloarcula marismortui (strain ATCC 43049 / DSM 3752 / JCM 8966 / VKM B-1809) GN=glpK PE=3 SV=1	K00864	2.7.1.30	0.0,0.0,0.0,0.0,1.0,0.0,0.0,1.0,9.0,6.0,5.0,5.0,4.0,4.0,4.0,2.0,2.0,3.0,4.0,1.0,0.0,0.0,0.0,0.0,4.0,4.0,4.0,3.0,0.0,3.0,2.0,5.0,5.0,4.0,3.0,6.0,3.0,9.0,1.0,0.0,0.0,0.0,1.0,0.0
ULP2B_ARATH Probable ubiquitin-like-specific protease 2B OS=Arabidopsis thaliana GN=ULP2B PE=1 SV=3	K08596	3.4.22.68	0.0,0.0,0.0,0.0,0.0,0.0,0.0,1.0,0.0,0.0,0.0,0.0,0.0,0.0,0.0,0.0,0.0,0.0,0.0,0.0,0.0,0.0,0.0,0.0,0.0,0.0,0.0,0.0,0.0,1.0,0.0,0.0,0.0,0.0,0.0,0.0,0.0,0.0,0.0,0.0,0.0,0.0,0.0,0.0
MG: Hydroxymethylpyrimidine/phosphomethylpyrimidine kinase OS=Salmonella typhimurium (strain LT2 / SGSC1412 / ATCC 700720) GN=thiD PE=1 SV=2 [P55882] Score: 214.0	K00941	2.7.1.49,2.7.4.7	0.0,0.0,0.0,0.0,1.0,0.0,0.0,0.0,0.0,0.0,0.0,0.0,0.0,0.0,0.0,0.0,0.0,0.0,0.0,0.0,0.0,0.0,0.0,0.0,0.0,0.0,0.0,0.0,0.0,0.0,0.0,0.0,0.0,0.0,0.0,0.0,0.0,0.0,0.0,0.0,0.0,0.0,0.0,0.0
MG: Transposon Tn7 transposition protein TnsB OS=Escherichia coli GN=tnsB PE=1 SV=1 [P13989] Score: 60.1	UNKNOWN	UNKNOWN	0.0,0.0,0.0,0.0,0.0,0.0,0.0,0.0,0.0,0.0,0.0,0.0,4.0,0.0,0.0,0.0,0.0,0.0,0.0,0.0,0.0,0.0,0.0,0.0,0.0,0.0,0.0,0.0,0.0,0.0,0.0,0.0,0.0,0.0,0.0,0.0,0.0,0.0,0.0,0.0,0.0,0.0,0.0,0.0
DHAS_SHIFL Aspartate-semialdehyde dehydrogenase OS=Shigella flexneri GN=asd PE=3 SV=1	K00133	1.2.1.11	0.0,0.0,0.0,0.0,0.0,0.0,0.0,0.0,0.0,0.0,0.0,0.0,0.0,0.0,0.0,0.0,0.0,0.0,0.0,0.0,0.0,0.0,0.0,0.0,0.0,0.0,0.0,0.0,0.0,0.0,0.0,0.0,0.0,0.0,0.0,0.0,0.0,0.0,0.0,0.0,0.0,0.0,11.0,0.0
MG: Beta-phosphoglucomutase OS=Bacillus subtilis (strain 168) GN=yvdM PE=1 SV=1 [O06995] Score: 166.0	K01838	5.4.2.6	0.0,0.0,0.0,0.0,0.0,0.0,0.0,0.0,0.0,0.0,0.0,0.0,0.0,0.0,1.0,1.0,0.0,0.0,0.0,0.0,0.0,0.0,0.0,0.0,0.0,0.0,0.0,0.0,0.0,0.0,0.0,1.0,0.0,0.0,0.0,0.0,0.0,0.0,0.0,0.0,0.0,0.0,0.0,2.0
MG: Hybrid signal transduction histidine kinase A OS=Dictyostelium discoideum GN=dhkA PE=1 SV=1 [Q54U87] Score: 129.0	UNKNOWN	2.7.13.3	0.0,0.0,0.0,0.0,0.0,0.0,0.0,0.0,0.0,0.0,0.0,0.0,5.0,4.0,14.0,7.0,2.0,4.0,1.0,9.0,0.0,0.0,0.0,0.0,0.0,0.0,0.0,0.0,0.0,0.0,0.0,0.0,0.0,0.0,0.0,0.0,0.0,0.0,0.0,0.0,0.0,0.0,0.0,0.0
S10A2_BOVIN Protein S100-A2 OS=Bos taurus GN=S100A2 PE=1 SV=1	UNKNOWN	UNKNOWN	0.0,0.0,0.0,0.0,0.0,0.0,1.0,1.0,0.0,0.0,0.0,0.0,0.0,0.0,0.0,0.0,0.0,0.0,0.0,0.0,0.0,3.0,0.0,1.0,0.0,0.0,0.0,0.0,0.0,0.0,0.0,0.0,0.0,0.0,0.0,0.0,0.0,0.0,0.0,0.0,0.0,0.0,0.0,0.0
MG: Cell surface glycoprotein OS=Halobacterium salinarum (strain ATCC 29341 / DSM 671 / R1) GN=csg PE=1 SV=1 [B0R8E4] Score: 57.4	UNKNOWN	UNKNOWN	37.0,48.0,23.0,9.0,19.0,28.0,49.0,31.0,50.0,46.0,33.0,42.0,27.0,30.0,17.0,3.0,17.0,21.0,16.0,3.0,4.0,11.0,10.0,9.0,26.0,20.0,21.0,16.0,71.0,70.0,25.0,43.0,8.0,7.0,5.0,1.0,46.0,63.0,59.0,63.0,4.0,10.0,8.0,29.0
OPR6_ORYSJ Putative 12-oxophytodienoate reductase 6 OS=Oryza sativa subsp. japonica GN=OPR6 PE=2 SV=1	K05894	1.3.1.-	6.0,9.0,0.0,0.0,3.0,3.0,2.0,3.0,9.0,7.0,8.0,10.0,0.0,1.0,0.0,2.0,1.0,0.0,1.0,0.0,0.0,0.0,0.0,0.0,0.0,0.0,0.0,0.0,0.0,0.0,0.0,0.0,0.0,0.0,0.0,0.0,1.0,0.0,0.0,0.0,0.0,0.0,0.0,0.0
MG: DNA-directed RNA polymerase subunit beta' OS=Thermosipho africanus (strain TCF52B) GN=rpoC PE=3 SV=1 [B7ICR2] Score: 107.0	K03046	2.7.7.6	0.0,0.0,0.0,0.0,0.0,1.0,0.0,0.0,0.0,0.0,0.0,0.0,0.0,0.0,0.0,0.0,0.0,0.0,0.0,0.0,0.0,0.0,0.0,0.0,0.0,0.0,0.0,0.0,0.0,0.0,0.0,0.0,0.0,0.0,0.0,0.0,0.0,0.0,0.0,0.0,0.0,0.0,0.0,0.0
MG: UPF0264 protein Mbar_A1101 OS=Methanosarcina barkeri (strain Fusaro / DSM 804) GN=Mbar_A1101 PE=3 SV=1 [Q46DH3] Score: 248.0	K09733	4.2.3.153	0.0,0.0,0.0,0.0,0.0,0.0,0.0,0.0,2.0,0.0,1.0,0.0,3.0,0.0,2.0,3.0,4.0,0.0,1.0,0.0,0.0,0.0,0.0,0.0,0.0,0.0,0.0,0.0,0.0,1.0,1.0,0.0,0.0,0.0,0.0,0.0,0.0,0.0,5.0,8.0,1.0,1.0,0.0,0.0
SP9_XENTR Transcription factor Sp9 OS=Xenopus tropicalis GN=sp9 PE=2 SV=1	K09199	UNKNOWN	0.0,0.0,0.0,0.0,0.0,0.0,0.0,0.0,0.0,0.0,0.0,0.0,0.0,0.0,0.0,0.0,0.0,0.0,0.0,0.0,0.0,1.0,0.0,0.0,0.0,0.0,0.0,0.0,0.0,0.0,0.0,0.0,0.0,0.0,0.0,0.0,0.0,0.0,0.0,0.0,0.0,0.0,0.0,0.0
C724B_ORYSJ Cytochrome P450 724B1 OS=Oryza sativa subsp. japonica GN=CYP724B1 PE=1 SV=1	K12639	1.14.-.-	0.0,0.0,0.0,0.0,0.0,0.0,0.0,0.0,0.0,0.0,0.0,1.0,0.0,0.0,0.0,0.0,0.0,0.0,0.0,0.0,0.0,0.0,0.0,0.0,0.0,0.0,0.0,0.0,0.0,0.0,0.0,0.0,0.0,0.0,0.0,0.0,0.0,0.0,0.0,0.0,0.0,0.0,0.0,0.0
SYE1_WOLPM Glutamate--tRNA ligase 1 OS=Wolbachia pipientis wMel GN=gltX1 PE=3 SV=1	K01885	6.1.1.17	0.0,0.0,0.0,0.0,0.0,0.0,0.0,0.0,0.0,0.0,0.0,0.0,0.0,0.0,0.0,0.0,0.0,0.0,0.0,0.0,0.0,0.0,0.0,0.0,0.0,0.0,0.0,0.0,0.0,0.0,0.0,0.0,0.0,0.0,0.0,0.0,0.0,0.0,3.0,2.0,0.0,0.0,0.0,0.0
MG: Cell division protein FtsB OS=Pseudomonas aeruginosa (strain ATCC 15692 / PAO1 / 1C / PRS 101 / LMG 12228) GN=ftsB PE=3 SV=1 [Q9HXZ6] Score: 133.0	K05589	UNKNOWN	0.0,0.0,0.0,0.0,0.0,0.0,0.0,0.0,0.0,0.0,1.0,1.0,0.0,0.0,0.0,0.0,0.0,0.0,0.0,0.0,0.0,0.0,0.0,0.0,0.0,0.0,0.0,0.0,0.0,0.0,0.0,0.0,0.0,0.0,0.0,0.0,0.0,0.0,0.0,0.0,0.0,0.0,0.0,0.0
MG: 1-acyl-sn-glycerol-3-phosphate acyltransferase OS=Bacillus subtilis (strain 168) GN=plsC PE=1 SV=1 [O07584] Score: 92.8	K00655	2.3.1.n4	1.0,0.0,0.0,0.0,0.0,0.0,0.0,0.0,0.0,0.0,0.0,0.0,2.0,1.0,0.0,0.0,0.0,0.0,0.0,0.0,0.0,0.0,0.0,1.0,0.0,1.0,0.0,0.0,0.0,0.0,0.0,0.0,0.0,0.0,0.0,0.0,0.0,1.0,0.0,0.0,0.0,0.0,0.0,0.0
SSB2_STAAC Single-stranded DNA-binding protein 2 OS=Staphylococcus aureus (strain COL) GN=ssb-p PE=3 SV=1	K03111	UNKNOWN	0.0,0.0,0.0,0.0,0.0,0.0,0.0,0.0,0.0,0.0,0.0,0.0,0.0,0.0,0.0,0.0,1.0,0.0,0.0,0.0,0.0,0.0,0.0,0.0,0.0,0.0,0.0,0.0,0.0,0.0,0.0,0.0,0.0,0.0,0.0,0.0,0.0,0.0,0.0,0.0,0.0,0.0,0.0,0.0
MG: UPF0192 protein PD_0518 OS=Xylella fastidiosa (strain Temecula1 / ATCC 700964) GN=PD_0518 PE=3 SV=1 [Q87E11] Score: 252.0	K06894	UNKNOWN	0.0,0.0,0.0,0.0,0.0,0.0,0.0,0.0,0.0,0.0,0.0,0.0,0.0,0.0,0.0,0.0,0.0,0.0,0.0,0.0,0.0,0.0,0.0,0.0,1.0,0.0,0.0,0.0,0.0,0.0,0.0,0.0,0.0,1.0,0.0,0.0,1.0,0.0,0.0,0.0,0.0,0.0,0.0,0.0
MG: 50S ribosomal protein L15 OS=Enterococcus faecalis (strain ATCC 700802 / V583) GN=rplO PE=3 SV=1 [Q839E5] Score: 261.0	K02876	UNKNOWN	29.0,23.0,53.0,52.0,0.0,0.0,0.0,2.0,1.0,0.0,0.0,0.0,0.0,0.0,0.0,0.0,0.0,0.0,0.0,0.0,9.0,5.0,0.0,4.0,0.0,0.0,0.0,0.0,0.0,1.0,0.0,0.0,0.0,0.0,0.0,0.0,2.0,5.0,2.0,2.0,0.0,0.0,9.0,0.0
RS11_XANP2 30S ribosomal protein S11 OS=Xanthobacter autotrophicus (strain ATCC BAA-1158 / Py2) GN=rpsK PE=3 SV=1	K02948	UNKNOWN	0.0,0.0,0.0,0.0,0.0,0.0,19.0,0.0,0.0,0.0,0.0,0.0,21.0,0.0,0.0,8.0,17.0,0.0,0.0,20.0,0.0,0.0,0.0,0.0,0.0,0.0,0.0,0.0,0.0,0.0,0.0,0.0,0.0,0.0,0.0,0.0,0.0,0.0,0.0,0.0,0.0,0.0,0.0,0.0
MG: Glutamine--tRNA ligase OS=Psychromonas ingrahamii (strain 37) GN=glnS PE=3 SV=1 [A1SS83] Score: 298.0	K01886	6.1.1.18	0.0,0.0,0.0,0.0,0.0,0.0,0.0,1.0,0.0,0.0,0.0,0.0,0.0,0.0,0.0,0.0,0.0,0.0,0.0,0.0,0.0,0.0,0.0,0.0,0.0,0.0,0.0,0.0,0.0,0.0,0.0,0.0,0.0,0.0,0.0,0.0,0.0,0.0,0.0,0.0,0.0,0.0,3.0,0.0
MG: UDP-glucose 6-dehydrogenase OS=Rhizobium meliloti (strain 1021) GN=rkpK PE=3 SV=2 [O54068] Score: 486.0	K00012	1.1.1.22	0.0,0.0,0.0,0.0,0.0,0.0,1.0,0.0,0.0,0.0,0.0,0.0,0.0,0.0,0.0,0.0,0.0,0.0,0.0,0.0,0.0,0.0,0.0,0.0,0.0,0.0,0.0,0.0,0.0,0.0,0.0,0.0,0.0,0.0,0.0,0.0,0.0,0.0,0.0,0.0,0.0,0.0,0.0,0.0
MG: Acyl-coenzyme A synthetase ACSM3, mitochondrial OS=Pongo abelii GN=ACSM3 PE=2 SV=1 [Q5REV5] Score: 401.0	K01896	6.2.1.2	1.0,1.0,0.0,0.0,0.0,0.0,0.0,0.0,0.0,1.0,1.0,0.0,0.0,0.0,0.0,0.0,0.0,0.0,0.0,0.0,0.0,0.0,0.0,0.0,1.0,2.0,0.0,0.0,0.0,0.0,0.0,0.0,0.0,0.0,0.0,0.0,0.0,0.0,0.0,0.0,0.0,0.0,1.0,0.0
MG: Spore cortex-lytic enzyme OS=Bacillus subtilis (strain 168) GN=sleB PE=1 SV=1 [P50739] Score: 99.4	K01449	UNKNOWN	0.0,0.0,0.0,0.0,0.0,0.0,0.0,0.0,0.0,0.0,0.0,0.0,0.0,0.0,0.0,0.0,0.0,1.0,0.0,0.0,0.0,0.0,0.0,0.0,0.0,0.0,0.0,0.0,0.0,0.0,0.0,0.0,0.0,0.0,0.0,0.0,0.0,0.0,0.0,0.0,0.0,0.0,0.0,0.0
MG: Uncharacterized ABC transporter permease protein YtlD OS=Bacillus subtilis (strain 168) GN=ytlD PE=3 SV=1 [O34649] Score: 204.0	K02050	UNKNOWN	0.0,0.0,0.0,0.0,0.0,0.0,0.0,0.0,0.0,0.0,0.0,0.0,0.0,0.0,0.0,0.0,0.0,0.0,1.0,0.0,0.0,0.0,0.0,0.0,0.0,0.0,0.0,0.0,0.0,0.0,0.0,0.0,0.0,0.0,0.0,0.0,0.0,0.0,0.0,0.0,0.0,0.0,0.0,1.0
MG: 50S ribosomal protein L31 type B OS=Bacteroides vulgatus (strain ATCC 8482 / DSM 1447 / NCTC 11154) GN=rpmE2 PE=3 SV=1 [A6L0Y7] Score: 112.0	K02909	UNKNOWN	0.0,0.0,0.0,0.0,0.0,0.0,0.0,0.0,0.0,0.0,0.0,0.0,0.0,0.0,0.0,0.0,0.0,0.0,0.0,0.0,19.0,20.0,38.0,14.0,0.0,0.0,0.0,0.0,0.0,0.0,0.0,0.0,0.0,0.0,0.0,0.0,0.0,0.0,0.0,0.0,0.0,0.0,0.0,1.0
MG: UPF0180 protein GK1051 OS=Geobacillus kaustophilus (strain HTA426) GN=GK1051 PE=3 SV=1 [Q5L144] Score: 58.9	UNKNOWN	UNKNOWN	0.0,0.0,0.0,0.0,0.0,0.0,0.0,0.0,0.0,0.0,0.0,0.0,0.0,0.0,0.0,0.0,0.0,0.0,0.0,0.0,0.0,0.0,0.0,0.0,0.0,0.0,0.0,0.0,1.0,0.0,0.0,0.0,0.0,0.0,0.0,0.0,0.0,0.0,0.0,0.0,0.0,0.0,0.0,0.0
MG: Chitooligosaccharide deacetylase OS=Rhizobium galegae GN=nodB PE=3 SV=1 [P50354] Score: 127.0	UNKNOWN	3.5.1.-	0.0,0.0,0.0,0.0,0.0,0.0,0.0,0.0,0.0,0.0,0.0,0.0,0.0,0.0,0.0,0.0,0.0,0.0,0.0,0.0,0.0,0.0,0.0,1.0,0.0,0.0,0.0,0.0,0.0,0.0,0.0,0.0,0.0,0.0,0.0,0.0,0.0,0.0,0.0,0.0,0.0,0.0,0.0,0.0
MG: Sugar phosphatase YidA OS=Escherichia coli O6:H1 (strain CFT073 / ATCC 700928 / UPEC) GN=yidA PE=3 SV=1 [P0A8Y6] Score: 108.0	K07024	3.1.3.23	0.0,0.0,0.0,0.0,0.0,0.0,0.0,0.0,0.0,0.0,0.0,0.0,2.0,0.0,0.0,0.0,0.0,0.0,0.0,0.0,0.0,0.0,0.0,0.0,0.0,0.0,0.0,0.0,0.0,0.0,0.0,0.0,0.0,0.0,0.0,0.0,0.0,0.0,0.0,0.0,0.0,0.0,0.0,0.0
MG: 50S ribosomal protein L6 OS=Peptoclostridium difficile (strain 630) GN=rplF PE=3 SV=1 [Q18CH5] Score: 248.0	K02933	UNKNOWN	13.0,8.0,26.0,20.0,21.0,28.0,17.0,11.0,1.0,0.0,0.0,0.0,19.0,15.0,11.0,0.0,5.0,4.0,0.0,0.0,9.0,2.0,0.0,1.0,0.0,0.0,0.0,0.0,2.0,1.0,1.0,8.0,0.0,3.0,0.0,0.0,8.0,8.0,4.0,5.0,0.0,0.0,6.0,0.0
MG: L-aspartate oxidase, chloroplastic OS=Oryza sativa subsp. japonica GN=Os02g0134400 PE=3 SV=1 [Q6Z836] Score: 394.0	K00278	1.4.3.16	1.0,0.0,0.0,0.0,0.0,0.0,0.0,0.0,0.0,0.0,0.0,0.0,0.0,0.0,0.0,0.0,0.0,0.0,0.0,0.0,0.0,0.0,0.0,0.0,0.0,0.0,0.0,0.0,1.0,0.0,0.0,0.0,0.0,0.0,0.0,0.0,0.0,0.0,0.0,0.0,0.0,0.0,0.0,0.0
MG: Dihydropteroate synthase OS=Synechocystis sp. (strain PCC 6803 / Kazusa) GN=folP PE=3 SV=1 [P73248] Score: 174.0	K00796	2.5.1.15	0.0,0.0,1.0,0.0,0.0,0.0,0.0,0.0,0.0,0.0,0.0,0.0,0.0,0.0,0.0,0.0,0.0,0.0,0.0,0.0,0.0,0.0,0.0,0.0,0.0,0.0,0.0,0.0,0.0,0.0,0.0,0.0,0.0,0.0,0.0,0.0,0.0,0.0,0.0,0.0,0.0,0.0,0.0,0.0
UBPY_CAEEL Probable ubiquitin carboxyl-terminal hydrolase K02C4.3 OS=Caenorhabditis elegans GN=K02C4.3 PE=3 SV=3	K11849	3.4.19.12	0.0,0.0,0.0,0.0,1.0,0.0,0.0,2.0,0.0,0.0,0.0,0.0,0.0,0.0,0.0,0.0,0.0,0.0,0.0,0.0,0.0,0.0,0.0,0.0,0.0,0.0,0.0,0.0,0.0,0.0,0.0,0.0,0.0,0.0,0.0,0.0,0.0,0.0,0.0,0.0,0.0,0.0,0.0,0.0
MG: MmsAB operon regulatory protein OS=Pseudomonas aeruginosa (strain ATCC 15692 / PAO1 / 1C / PRS 101 / LMG 12228) GN=mmsR PE=3 SV=2 [P28809] Score: 160.0	UNKNOWN	UNKNOWN	0.0,0.0,0.0,0.0,0.0,0.0,0.0,0.0,0.0,0.0,0.0,0.0,0.0,0.0,0.0,1.0,0.0,0.0,0.0,0.0,0.0,0.0,0.0,0.0,0.0,0.0,0.0,0.0,0.0,0.0,0.0,0.0,0.0,0.0,0.0,0.0,0.0,0.0,0.0,0.0,0.0,0.0,0.0,0.0
MG: L-sorbosone dehydrogenase OS=Gluconacetobacter liquefaciens PE=4 SV=1 [Q44091] Score: 47.4	UNKNOWN	1.1.1.-	0.0,0.0,0.0,0.0,0.0,0.0,0.0,0.0,0.0,0.0,0.0,0.0,0.0,0.0,0.0,0.0,0.0,0.0,0.0,0.0,0.0,0.0,0.0,0.0,0.0,0.0,0.0,0.0,0.0,0.0,0.0,0.0,0.0,1.0,0.0,0.0,0.0,0.0,0.0,0.0,0.0,0.0,0.0,0.0
Y660_PELUB UPF0317 protein SAR11_0660 OS=Pelagibacter ubique (strain HTCC1062) GN=SAR11_0660 PE=3 SV=1	UNKNOWN	UNKNOWN	0.0,0.0,0.0,0.0,0.0,0.0,0.0,0.0,0.0,0.0,0.0,0.0,0.0,0.0,0.0,0.0,0.0,1.0,0.0,0.0,0.0,0.0,0.0,0.0,0.0,0.0,0.0,0.0,0.0,0.0,0.0,0.0,0.0,0.0,0.0,0.0,0.0,0.0,0.0,0.0,0.0,0.0,0.0,0.0
MG: Chemotaxis protein methyltransferase OS=Thermotoga maritima (strain ATCC 43589 / MSB8 / DSM 3109 / JCM 10099) GN=cheR PE=3 SV=1 [Q9WYT5] Score: 202.0	K00575	2.1.1.80	0.0,0.0,0.0,0.0,0.0,0.0,0.0,0.0,0.0,0.0,0.0,0.0,13.0,17.0,16.0,4.0,7.0,9.0,10.0,8.0,0.0,0.0,0.0,0.0,0.0,0.0,0.0,0.0,0.0,0.0,0.0,0.0,0.0,0.0,0.0,0.0,0.0,0.0,0.0,0.0,0.0,0.0,0.0,0.0
MG: Iron-regulated outer membrane virulence protein OS=Vibrio cholerae serotype O1 (strain ATCC 39315 / El Tor Inaba N16961) GN=irgA PE=3 SV=1 [P0C6R0] Score: 95.1	K16089	UNKNOWN	0.0,0.0,0.0,0.0,0.0,0.0,0.0,0.0,0.0,0.0,0.0,0.0,0.0,0.0,0.0,0.0,0.0,0.0,0.0,0.0,0.0,1.0,0.0,0.0,0.0,0.0,0.0,0.0,2.0,0.0,1.0,0.0,0.0,0.0,0.0,0.0,0.0,0.0,0.0,0.0,0.0,0.0,1.0,0.0
MG: Putative ankyrin repeat protein FPV228 OS=Fowlpox virus (strain NVSL) GN=FPV228 PE=3 SV=1 [Q9J507] Score: 67.0	UNKNOWN	UNKNOWN	0.0,0.0,0.0,0.0,0.0,0.0,0.0,0.0,0.0,0.0,0.0,0.0,1.0,0.0,0.0,0.0,0.0,0.0,0.0,0.0,0.0,0.0,0.0,0.0,0.0,0.0,0.0,0.0,0.0,0.0,0.0,0.0,0.0,0.0,0.0,0.0,0.0,0.0,0.0,0.0,0.0,0.0,0.0,0.0
MG: NAD(P) transhydrogenase subunit alpha part 2 OS=Rhodospirillum rubrum GN=pntAB PE=3 SV=1 [P0C187] Score: 79.7	UNKNOWN	1.6.1.2	0.0,0.0,0.0,0.0,0.0,0.0,0.0,0.0,0.0,0.0,0.0,0.0,0.0,0.0,0.0,0.0,0.0,0.0,0.0,0.0,0.0,0.0,0.0,0.0,0.0,0.0,0.0,0.0,0.0,0.0,0.0,0.0,0.0,0.0,0.0,0.0,0.0,0.0,0.0,0.0,0.0,0.0,0.0,1.0
RNP1_HYPBU Ribonuclease P protein component 1 OS=Hyperthermus butylicus (strain DSM 5456 / JCM 9403 / PLM1-5) GN=rnp1 PE=3 SV=1	K03538	3.1.26.5	1.0,0.0,0.0,0.0,0.0,0.0,0.0,0.0,0.0,0.0,0.0,0.0,0.0,0.0,0.0,0.0,0.0,0.0,0.0,0.0,0.0,0.0,0.0,0.0,0.0,0.0,0.0,0.0,0.0,0.0,0.0,0.0,0.0,0.0,0.0,0.0,0.0,0.0,0.0,0.0,0.0,0.0,0.0,0.0
CMR1_CANAL DNA damage-binding protein CMR1 OS=Candida albicans (strain SC5314 / ATCC MYA-2876) GN=CaJ7.0141 PE=3 SV=1	UNKNOWN	UNKNOWN	0.0,0.0,0.0,0.0,0.0,0.0,0.0,0.0,0.0,0.0,0.0,0.0,0.0,0.0,0.0,0.0,0.0,0.0,0.0,0.0,0.0,0.0,0.0,0.0,1.0,0.0,0.0,0.0,0.0,1.0,0.0,0.0,0.0,0.0,1.0,0.0,0.0,0.0,0.0,0.0,0.0,0.0,0.0,0.0
MUTS2_HALOH Endonuclease MutS2 OS=Halothermothrix orenii (strain H 168 / OCM 544 / DSM 9562) GN=mutS2 PE=3 SV=1	K07456	3.1.-.-	0.0,0.0,0.0,0.0,0.0,0.0,0.0,0.0,0.0,0.0,0.0,0.0,0.0,0.0,0.0,0.0,0.0,0.0,0.0,0.0,0.0,0.0,0.0,0.0,0.0,0.0,0.0,0.0,0.0,1.0,0.0,0.0,0.0,0.0,0.0,0.0,0.0,0.0,0.0,0.0,0.0,0.0,0.0,0.0
PRS55_HUMAN Serine protease 55 OS=Homo sapiens GN=PRSS55 PE=1 SV=2	UNKNOWN	3.4.21.-	0.0,0.0,0.0,0.0,0.0,0.0,0.0,0.0,2.0,0.0,0.0,0.0,0.0,0.0,0.0,0.0,0.0,0.0,0.0,0.0,0.0,0.0,0.0,0.0,0.0,0.0,0.0,0.0,0.0,0.0,0.0,0.0,0.0,0.0,0.0,0.0,0.0,0.0,0.0,0.0,0.0,0.0,0.0,0.0
HTPG_CAMJ8 Chaperone protein HtpG OS=Campylobacter jejuni subsp. jejuni serotype O:6 (strain 81116 / NCTC 11828) GN=htpG PE=3 SV=1	K04079	UNKNOWN	0.0,0.0,0.0,0.0,0.0,0.0,0.0,0.0,0.0,0.0,0.0,0.0,0.0,0.0,0.0,0.0,0.0,0.0,0.0,0.0,0.0,0.0,0.0,0.0,0.0,0.0,0.0,0.0,0.0,0.0,0.0,0.0,0.0,0.0,1.0,0.0,0.0,0.0,0.0,0.0,0.0,0.0,0.0,0.0
MG: Dihydrolipoyllysine-residue acetyltransferase component of pyruvate dehydrogenase complex, mitochondrial OS=Schizosaccharomyces pombe (strain 972 / ATCC 24843) GN=lat1 PE=3 SV=1 [O59816] Score: 134.0	K00627	2.3.1.12	0.0,0.0,0.0,0.0,0.0,0.0,0.0,0.0,0.0,0.0,0.0,0.0,0.0,0.0,0.0,0.0,0.0,0.0,0.0,0.0,0.0,0.0,0.0,0.0,0.0,0.0,0.0,0.0,0.0,0.0,0.0,0.0,0.0,0.0,0.0,0.0,0.0,0.0,0.0,0.0,0.0,0.0,2.0,0.0
SYP2_RHOJR Proline--tRNA ligase 2 OS=Rhodococcus jostii (strain RHA1) GN=proS2 PE=3 SV=2	K01881	6.1.1.15	0.0,0.0,0.0,0.0,0.0,0.0,0.0,0.0,0.0,0.0,0.0,0.0,0.0,0.0,0.0,0.0,0.0,0.0,0.0,0.0,0.0,0.0,0.0,0.0,0.0,0.0,0.0,0.0,0.0,0.0,0.0,0.0,0.0,0.0,0.0,0.0,0.0,0.0,2.0,0.0,0.0,0.0,0.0,0.0
MG: Type A flavoprotein FprA OS=Methanocaldococcus jannaschii (strain ATCC 43067 / DSM 2661 / JAL-1 / JCM 10045 / NBRC 100440) GN=fprA PE=3 SV=1 [Q58158] Score: 398.0	K19817	1.-.-.-	68.0,68.0,11.0,3.0,23.0,28.0,11.0,8.0,54.0,43.0,43.0,43.0,80.0,143.0,249.0,247.0,262.0,275.0,166.0,152.0,0.0,0.0,0.0,0.0,64.0,49.0,52.0,36.0,96.0,87.0,45.0,51.0,2.0,1.0,0.0,0.0,46.0,27.0,63.0,58.0,2.0,55.0,8.0,95.0
MG: Lactate utilization protein B OS=Bacillus pumilus (strain SAFR-032) GN=lutB PE=3 SV=1 [A8FDN5] Score: 340.0	K18929	UNKNOWN	4.0,2.0,0.0,0.0,0.0,1.0,0.0,0.0,0.0,0.0,0.0,0.0,5.0,0.0,0.0,0.0,0.0,0.0,0.0,0.0,0.0,0.0,0.0,0.0,0.0,0.0,1.0,0.0,0.0,0.0,0.0,0.0,0.0,0.0,0.0,0.0,0.0,0.0,0.0,0.0,0.0,0.0,0.0,0.0
MG: Methyltransferase-like protein 24 OS=Mus musculus GN=Mettl24 PE=2 SV=1 [Q8CCB5] Score: 58.5	UNKNOWN	2.1.1.-	14.0,12.0,11.0,11.0,1.0,0.0,3.0,7.0,0.0,0.0,1.0,2.0,2.0,2.0,3.0,2.0,0.0,1.0,2.0,1.0,3.0,5.0,9.0,5.0,0.0,0.0,0.0,1.0,10.0,17.0,1.0,3.0,0.0,0.0,5.0,2.0,0.0,0.0,0.0,0.0,0.0,4.0,3.0,7.0
MG: 2,5-diamino-6-ribosylamino-4(3H)-pyrimidinone 5'-phosphate reductase OS=Archaeoglobus fulgidus (strain ATCC 49558 / VC-16 / DSM 4304 / JCM 9628 / NBRC 100126) GN=AF_2007 PE=3 SV=1 [O28272] Score: 204.0	K14654	1.1.1.302	2.0,0.0,0.0,0.0,1.0,3.0,1.0,0.0,0.0,0.0,0.0,0.0,0.0,0.0,0.0,0.0,0.0,0.0,0.0,0.0,0.0,0.0,0.0,0.0,0.0,0.0,0.0,0.0,0.0,0.0,0.0,0.0,0.0,0.0,0.0,0.0,0.0,0.0,0.0,2.0,0.0,0.0,0.0,0.0
NEU2_STRCA Neurophysin 2 OS=Struthio camelus PE=1 SV=1	UNKNOWN	UNKNOWN	0.0,0.0,0.0,0.0,0.0,0.0,0.0,0.0,0.0,0.0,0.0,0.0,0.0,0.0,0.0,0.0,0.0,0.0,0.0,0.0,0.0,0.0,0.0,0.0,0.0,0.0,0.0,0.0,0.0,0.0,0.0,0.0,1.0,0.0,0.0,0.0,0.0,0.0,0.0,0.0,0.0,0.0,0.0,0.0
ARNT_ESCF3 Undecaprenyl phosphate-alpha-4-amino-4-deoxy-L-arabinose arabinosyl transferase OS=Escherichia fergusonii (strain ATCC 35469 / DSM 13698 / CDC 0568-73) GN=arnT PE=3 SV=2	K07264	2.4.2.43	0.0,0.0,0.0,0.0,0.0,0.0,0.0,0.0,0.0,0.0,0.0,0.0,0.0,1.0,0.0,0.0,0.0,0.0,0.0,0.0,0.0,0.0,0.0,0.0,0.0,0.0,0.0,0.0,0.0,0.0,0.0,0.0,0.0,0.0,0.0,0.0,0.0,0.0,0.0,0.0,0.0,0.0,0.0,0.0
MG: Uncharacterized protein aq_aa25 OS=Aquifex aeolicus (strain VF5) GN=aq_aa25 PE=4 SV=1 [O66416] Score: 90.9	UNKNOWN	UNKNOWN	0.0,0.0,0.0,0.0,0.0,0.0,0.0,0.0,0.0,0.0,0.0,0.0,0.0,0.0,0.0,0.0,0.0,0.0,0.0,0.0,0.0,0.0,0.0,0.0,0.0,0.0,0.0,1.0,0.0,0.0,0.0,0.0,0.0,0.0,0.0,0.0,0.0,0.0,0.0,0.0,0.0,0.0,0.0,0.0
MG: D-alanyl-D-alanine carboxypeptidase DacB OS=Escherichia coli (strain K12) GN=dacB PE=1 SV=2 [P24228] Score: 151.0	K07259	3.4.16.4,3.4.21.-	0.0,0.0,0.0,0.0,0.0,0.0,0.0,0.0,0.0,0.0,0.0,0.0,0.0,0.0,0.0,0.0,0.0,0.0,0.0,1.0,0.0,0.0,0.0,0.0,0.0,0.0,0.0,0.0,0.0,0.0,0.0,0.0,0.0,0.0,0.0,0.0,0.0,0.0,0.0,0.0,0.0,0.0,0.0,0.0
MG: Insertion sequence IS232 putative ATP-binding protein OS=Bacillus thuringiensis subsp. berliner PE=3 SV=1 [Q99338] Score: 112.0	UNKNOWN	UNKNOWN	0.0,0.0,0.0,0.0,0.0,0.0,0.0,0.0,0.0,0.0,0.0,0.0,2.0,0.0,1.0,0.0,0.0,0.0,1.0,0.0,0.0,0.0,0.0,0.0,0.0,0.0,0.0,0.0,0.0,0.0,0.0,0.0,0.0,0.0,0.0,0.0,0.0,0.0,0.0,0.0,0.0,0.0,0.0,0.0
RPOB_RHDSA DNA-directed RNA polymerase subunit beta OS=Rhodomonas salina GN=rpoB PE=3 SV=1	K03043	2.7.7.6	0.0,0.0,0.0,0.0,1.0,0.0,1.0,0.0,3.0,4.0,1.0,3.0,7.0,3.0,5.0,2.0,4.0,8.0,1.0,0.0,1.0,1.0,0.0,2.0,4.0,9.0,10.0,5.0,0.0,0.0,0.0,0.0,3.0,2.0,2.0,7.0,16.0,19.0,2.0,2.0,2.0,2.0,13.0,1.0
MG: Uncharacterized protein YgaU OS=Escherichia coli (strain K12) GN=ygaU PE=1 SV=2 [P0ADE6] Score: 47.8	UNKNOWN	UNKNOWN	0.0,0.0,0.0,0.0,0.0,0.0,0.0,0.0,0.0,0.0,0.0,0.0,2.0,0.0,0.0,0.0,0.0,0.0,0.0,0.0,0.0,0.0,0.0,0.0,0.0,0.0,0.0,0.0,0.0,0.0,0.0,0.0,0.0,0.0,0.0,0.0,0.0,0.0,0.0,0.0,0.0,0.0,0.0,0.0
MG: Putative transposase in snaA-snaB intergenic region OS=Streptomyces pristinaespiralis PE=3 SV=1 [P54992] Score: 129.0	UNKNOWN	UNKNOWN	0.0,0.0,0.0,0.0,0.0,0.0,0.0,0.0,0.0,0.0,0.0,0.0,3.0,0.0,0.0,0.0,0.0,0.0,0.0,0.0,0.0,0.0,0.0,1.0,0.0,0.0,0.0,0.0,0.0,1.0,0.0,0.0,0.0,0.0,0.0,0.0,0.0,0.0,0.0,0.0,0.0,1.0,0.0,0.0
MG: Ribulose-phosphate 3-epimerase OS=Bacillus subtilis (strain 168) GN=rpe PE=3 SV=1 [O34557] Score: 280.0	K01783	5.1.3.1	0.0,0.0,1.0,0.0,0.0,0.0,0.0,0.0,2.0,0.0,0.0,0.0,0.0,4.0,3.0,0.0,0.0,1.0,0.0,0.0,1.0,0.0,0.0,0.0,0.0,0.0,0.0,0.0,0.0,0.0,0.0,0.0,0.0,1.0,0.0,0.0,1.0,0.0,0.0,0.0,0.0,0.0,0.0,0.0
ADDA_LISIN ATP-dependent helicase/nuclease subunit A OS=Listeria innocua serovar 6a (strain CLIP 11262) GN=addA PE=3 SV=1	K16898	3.1.-.-,3.6.4.12	0.0,0.0,0.0,0.0,0.0,0.0,0.0,0.0,0.0,0.0,0.0,0.0,0.0,0.0,0.0,0.0,0.0,0.0,0.0,0.0,0.0,0.0,0.0,0.0,0.0,0.0,0.0,0.0,0.0,0.0,0.0,0.0,0.0,1.0,0.0,1.0,0.0,1.0,0.0,1.0,0.0,0.0,0.0,0.0
RL27_STRS2 50S ribosomal protein L27 OS=Streptococcus suis (strain 98HAH33) GN=rpmA PE=3 SV=1	K02899	UNKNOWN	3.0,4.0,15.0,17.0,0.0,0.0,0.0,0.0,0.0,0.0,0.0,0.0,0.0,0.0,0.0,0.0,0.0,0.0,0.0,0.0,4.0,3.0,1.0,3.0,0.0,0.0,0.0,0.0,0.0,0.0,0.0,0.0,0.0,0.0,0.0,0.0,0.0,0.0,6.0,8.0,0.0,0.0,0.0,0.0
MG: Iron-sulfur flavoprotein AF_1519 OS=Archaeoglobus fulgidus (strain ATCC 49558 / VC-16 / DSM 4304 / JCM 9628 / NBRC 100126) GN=AF_1519 PE=3 SV=1 [O28753] Score: 99.4	UNKNOWN	UNKNOWN	0.0,0.0,0.0,0.0,2.0,4.0,3.0,0.0,2.0,2.0,0.0,0.0,0.0,0.0,0.0,0.0,0.0,0.0,0.0,0.0,0.0,0.0,0.0,0.0,0.0,0.0,0.0,0.0,0.0,0.0,0.0,0.0,0.0,0.0,0.0,0.0,0.0,0.0,0.0,0.0,0.0,0.0,0.0,0.0
MG: Putrescine-binding periplasmic protein OS=Escherichia coli (strain K12) GN=potF PE=1 SV=3 [P31133] Score: 57.4	K11073	UNKNOWN	0.0,0.0,0.0,0.0,0.0,0.0,0.0,0.0,0.0,5.0,5.0,3.0,3.0,16.0,5.0,10.0,5.0,6.0,9.0,4.0,1.0,0.0,0.0,0.0,0.0,0.0,0.0,0.0,0.0,0.0,0.0,0.0,5.0,0.0,9.0,0.0,0.0,0.0,0.0,0.0,0.0,0.0,0.0,0.0
OLE16_BROSE Oleosin 16 kDa OS=Bromus secalinus GN=OLE16 PE=2 SV=1	UNKNOWN	UNKNOWN	0.0,0.0,0.0,0.0,0.0,0.0,0.0,1.0,0.0,0.0,0.0,0.0,0.0,1.0,0.0,0.0,0.0,1.0,0.0,0.0,0.0,0.0,0.0,0.0,0.0,0.0,0.0,0.0,0.0,0.0,0.0,0.0,0.0,0.0,0.0,0.0,0.0,1.0,0.0,0.0,0.0,0.0,0.0,0.0
SYA_SALAI Alanine--tRNA ligase OS=Salinispora arenicola (strain CNS-205) GN=alaS PE=3 SV=1	K01872	6.1.1.7	0.0,0.0,0.0,0.0,0.0,0.0,0.0,0.0,0.0,0.0,0.0,0.0,0.0,0.0,0.0,1.0,0.0,0.0,0.0,0.0,0.0,0.0,0.0,0.0,0.0,0.0,0.0,0.0,0.0,1.0,0.0,0.0,0.0,0.0,0.0,1.0,0.0,0.0,0.0,0.0,0.0,0.0,0.0,0.0
MG: Cytokinin riboside 5'-monophosphate phosphoribohydrolase OS=Rhodococcus fascians GN=fas6 PE=2 SV=1 [P46378] Score: 65.9	K06966	3.2.2.n1	0.0,0.0,0.0,0.0,0.0,0.0,0.0,0.0,0.0,0.0,0.0,0.0,0.0,0.0,0.0,0.0,0.0,0.0,0.0,0.0,0.0,0.0,0.0,0.0,0.0,0.0,0.0,0.0,0.0,1.0,0.0,0.0,0.0,0.0,0.0,0.0,0.0,0.0,0.0,0.0,0.0,0.0,0.0,0.0
KAD_RHILO Adenylate kinase OS=Rhizobium loti (strain MAFF303099) GN=adk PE=3 SV=1	K00939	2.7.4.3	0.0,0.0,0.0,0.0,0.0,0.0,0.0,0.0,0.0,0.0,0.0,0.0,0.0,0.0,0.0,0.0,0.0,0.0,0.0,0.0,0.0,0.0,0.0,0.0,0.0,0.0,0.0,0.0,0.0,0.0,0.0,0.0,0.0,0.0,0.0,0.0,0.0,0.0,2.0,0.0,0.0,0.0,0.0,0.0
HRCA_ENTFA Heat-inducible transcription repressor HrcA OS=Enterococcus faecalis (strain ATCC 700802 / V583) GN=hrcA PE=3 SV=1	K03705	UNKNOWN	0.0,0.0,0.0,0.0,0.0,0.0,0.0,0.0,0.0,0.0,0.0,0.0,3.0,0.0,0.0,0.0,0.0,0.0,0.0,0.0,0.0,0.0,0.0,0.0,0.0,0.0,0.0,0.0,0.0,0.0,0.0,0.0,0.0,0.0,0.0,0.0,0.0,0.0,0.0,0.0,0.0,0.0,0.0,0.0
MG: Cytosine deaminase OS=Escherichia coli (strain K12) GN=codA PE=1 SV=3 [P25524] Score: 79.3	K01485	3.5.4.-,3.5.4.1	0.0,0.0,0.0,0.0,0.0,0.0,0.0,0.0,0.0,0.0,0.0,0.0,0.0,0.0,0.0,0.0,0.0,0.0,0.0,0.0,0.0,0.0,1.0,0.0,0.0,0.0,0.0,0.0,0.0,0.0,0.0,0.0,0.0,0.0,0.0,0.0,0.0,0.0,0.0,0.0,0.0,0.0,0.0,0.0
MG: 50S ribosomal protein L23 OS=Clostridium phytofermentans (strain ATCC 700394 / DSM 18823 / ISDg) GN=rplW PE=3 SV=1 [A9KJJ2] Score: 164.0	K02892	UNKNOWN	5.0,3.0,10.0,7.0,0.0,0.0,0.0,0.0,0.0,1.0,1.0,0.0,0.0,0.0,0.0,0.0,0.0,0.0,0.0,0.0,0.0,2.0,0.0,0.0,0.0,0.0,0.0,0.0,0.0,5.0,0.0,0.0,0.0,0.0,0.0,0.0,0.0,0.0,0.0,0.0,0.0,0.0,0.0,0.0
RRF_METRJ Ribosome-recycling factor OS=Methylobacterium radiotolerans (strain ATCC 27329 / DSM 1819 / JCM 2831) GN=frr PE=3 SV=1	K02838	UNKNOWN	0.0,0.0,0.0,0.0,0.0,0.0,4.0,0.0,0.0,0.0,0.0,0.0,0.0,0.0,0.0,0.0,0.0,0.0,0.0,0.0,0.0,0.0,0.0,0.0,0.0,0.0,0.0,0.0,0.0,0.0,0.0,0.0,0.0,0.0,0.0,0.0,0.0,0.0,0.0,0.0,0.0,0.0,0.0,0.0
RR8_ACUOB 30S ribosomal protein S8, chloroplastic OS=Acutodesmus obliquus GN=rps8 PE=3 SV=1	UNKNOWN	UNKNOWN	0.0,0.0,0.0,0.0,0.0,0.0,0.0,0.0,0.0,0.0,0.0,0.0,0.0,0.0,0.0,0.0,0.0,0.0,0.0,0.0,0.0,0.0,0.0,0.0,0.0,0.0,0.0,1.0,0.0,0.0,0.0,0.0,0.0,0.0,0.0,2.0,0.0,1.0,0.0,0.0,0.0,0.0,0.0,0.0
NU3C_SYNPW NAD(P)H-quinone oxidoreductase subunit 3 OS=Synechococcus sp. (strain WH7803) GN=ndhC PE=3 SV=1	K05574	1.6.5.-	0.0,0.0,1.0,0.0,0.0,0.0,0.0,0.0,0.0,0.0,0.0,0.0,0.0,0.0,0.0,0.0,0.0,0.0,0.0,0.0,0.0,0.0,0.0,0.0,0.0,0.0,0.0,0.0,0.0,0.0,0.0,0.0,0.0,0.0,0.0,0.0,0.0,0.0,0.0,0.0,0.0,0.0,0.0,0.0
MG: Serine/threonine-protein kinase PknD OS=Protochlamydia amoebophila (strain UWE25) GN=pknD PE=3 SV=1 [Q6MAN0] Score: 171.0	K12132	2.7.11.1	0.0,0.0,0.0,0.0,0.0,0.0,0.0,0.0,0.0,0.0,0.0,0.0,0.0,0.0,0.0,0.0,0.0,0.0,0.0,0.0,0.0,0.0,0.0,0.0,1.0,0.0,0.0,0.0,0.0,0.0,0.0,0.0,0.0,0.0,0.0,0.0,0.0,0.0,0.0,0.0,0.0,0.0,0.0,0.0
MG: Protein IolH OS=Bacillus subtilis (strain 168) GN=iolH PE=4 SV=1 [P42418] Score: 51.2	K06605	UNKNOWN	1.0,0.0,0.0,0.0,0.0,0.0,0.0,0.0,0.0,1.0,0.0,0.0,0.0,0.0,0.0,0.0,0.0,0.0,0.0,0.0,0.0,0.0,0.0,0.0,0.0,0.0,0.0,0.0,0.0,0.0,0.0,0.0,1.0,0.0,4.0,1.0,0.0,1.0,0.0,0.0,0.0,0.0,0.0,0.0
MG: Probable GTP-binding protein EngB OS=Alkaliphilus oremlandii (strain OhILAs) GN=engB PE=3 SV=1 [A8MIS4] Score: 224.0	K03978	UNKNOWN	0.0,0.0,0.0,0.0,0.0,0.0,0.0,0.0,0.0,0.0,0.0,0.0,0.0,0.0,0.0,0.0,0.0,0.0,0.0,0.0,0.0,0.0,0.0,0.0,0.0,2.0,4.0,2.0,0.0,0.0,0.0,0.0,0.0,2.0,3.0,2.0,0.0,0.0,0.0,0.0,0.0,0.0,0.0,0.0
YOPH_BACSU SPBc2 prophage-derived uncharacterized protein YopH OS=Bacillus subtilis (strain 168) GN=yopH PE=4 SV=1	UNKNOWN	UNKNOWN	0.0,0.0,1.0,0.0,0.0,0.0,0.0,0.0,0.0,0.0,0.0,0.0,0.0,0.0,0.0,0.0,0.0,0.0,0.0,0.0,0.0,0.0,0.0,0.0,0.0,0.0,0.0,0.0,0.0,0.0,0.0,0.0,0.0,0.0,0.0,0.0,0.0,0.0,0.0,0.0,0.0,0.0,0.0,0.0
MG: Xylan 1,4-beta-xylosidase OS=Prevotella ruminicola (strain ATCC 19189 / JCM 8958 / 23) GN=xyl3A PE=1 SV=1 [D5EY15] Score: 602.0	K05349	3.2.1.37,3.2.1.55	12.0,9.0,4.0,0.0,19.0,24.0,41.0,44.0,34.0,24.0,17.0,18.0,23.0,24.0,38.0,30.0,36.0,49.0,10.0,4.0,17.0,17.0,36.0,22.0,1.0,3.0,2.0,0.0,12.0,22.0,8.0,5.0,11.0,6.0,24.0,29.0,17.0,4.0,4.0,4.0,1.0,22.0,2.0,4.0
RPOB_CALBD DNA-directed RNA polymerase subunit beta OS=Caldicellulosiruptor bescii (strain ATCC BAA-1888 / DSM 6725 / Z-1320) GN=rpoB PE=3 SV=1	K03043	2.7.7.6	2.0,4.0,4.0,5.0,3.0,3.0,2.0,5.0,8.0,9.0,5.0,12.0,10.0,6.0,10.0,7.0,5.0,14.0,5.0,4.0,2.0,6.0,0.0,3.0,4.0,9.0,10.0,5.0,0.0,0.0,0.0,0.0,5.0,2.0,3.0,9.0,20.0,20.0,3.0,3.0,2.0,2.0,10.0,5.0
DDPD_ECOLI Probable D,D-dipeptide transport ATP-binding protein DdpD OS=Escherichia coli (strain K12) GN=ddpD PE=2 SV=1	K02031	UNKNOWN	0.0,0.0,0.0,0.0,0.0,0.0,0.0,0.0,0.0,0.0,0.0,0.0,0.0,0.0,0.0,0.0,0.0,0.0,0.0,0.0,0.0,0.0,0.0,0.0,0.0,0.0,0.0,0.0,0.0,0.0,0.0,0.0,0.0,0.0,0.0,0.0,0.0,0.0,0.0,1.0,0.0,0.0,0.0,0.0
RT109_CANAL Histone acetyltransferase RTT109 OS=Candida albicans (strain SC5314 / ATCC MYA-2876) GN=RTT109 PE=3 SV=1	K11309	2.3.1.48	0.0,0.0,0.0,0.0,0.0,0.0,0.0,0.0,0.0,0.0,0.0,0.0,0.0,0.0,0.0,0.0,0.0,0.0,0.0,0.0,0.0,0.0,0.0,0.0,0.0,0.0,0.0,0.0,0.0,0.0,0.0,0.0,1.0,0.0,0.0,1.0,0.0,0.0,0.0,0.0,0.0,0.0,0.0,0.0
MG: Translation initiation factor IF-2 OS=Streptococcus pyogenes serotype M2 (strain MGAS10270) GN=infB PE=3 SV=1 [Q1JFG4] Score: 620.0	K02519	UNKNOWN	2.0,0.0,3.0,0.0,0.0,0.0,2.0,1.0,1.0,1.0,7.0,8.0,14.0,5.0,10.0,4.0,13.0,11.0,1.0,4.0,0.0,0.0,0.0,0.0,0.0,1.0,2.0,0.0,0.0,1.0,0.0,1.0,0.0,0.0,14.0,13.0,1.0,0.0,0.0,1.0,0.0,0.0,8.0,1.0
MG: 5'-nucleotidase OS=Vibrio cholerae serotype O1 (strain ATCC 39315 / El Tor Inaba N16961) GN=nutA PE=3 SV=1 [Q9KQ30] Score: 121.0	K11751	3.1.3.5	1.0,0.0,0.0,0.0,0.0,0.0,0.0,0.0,0.0,0.0,0.0,0.0,0.0,0.0,0.0,0.0,0.0,0.0,0.0,0.0,0.0,0.0,0.0,0.0,0.0,0.0,0.0,0.0,0.0,0.0,0.0,0.0,0.0,0.0,0.0,0.0,0.0,0.0,0.0,0.0,0.0,0.0,0.0,0.0
MG: Glycogen synthase OS=Acholeplasma laidlawii (strain PG-8A) GN=glgA PE=3 SV=1 [A9NFK6] Score: 300.0	K00703	2.4.1.21	0.0,0.0,0.0,0.0,0.0,0.0,0.0,0.0,0.0,0.0,0.0,0.0,0.0,1.0,0.0,0.0,0.0,0.0,0.0,0.0,0.0,0.0,0.0,0.0,0.0,0.0,0.0,0.0,0.0,0.0,0.0,0.0,0.0,0.0,0.0,0.0,0.0,0.0,0.0,0.0,0.0,0.0,0.0,0.0
TSAD_WOLPM tRNA N6-adenosine threonylcarbamoyltransferase OS=Wolbachia pipientis wMel GN=tsaD PE=3 SV=1	K01409	2.3.1.234	0.0,0.0,1.0,0.0,0.0,0.0,0.0,0.0,0.0,0.0,0.0,0.0,0.0,0.0,0.0,0.0,0.0,0.0,0.0,0.0,0.0,0.0,0.0,0.0,0.0,0.0,0.0,0.0,0.0,0.0,0.0,0.0,0.0,0.0,0.0,0.0,0.0,0.0,0.0,0.0,0.0,0.0,0.0,0.0
MG: Uncharacterized protein YqhL OS=Bacillus subtilis (strain 168) GN=yqhL PE=3 SV=2 [P54510] Score: 81.6	UNKNOWN	UNKNOWN	0.0,1.0,4.0,3.0,0.0,0.0,0.0,0.0,0.0,0.0,0.0,0.0,0.0,0.0,0.0,0.0,0.0,0.0,0.0,0.0,0.0,0.0,0.0,0.0,0.0,0.0,0.0,0.0,0.0,0.0,0.0,0.0,0.0,0.0,0.0,0.0,0.0,0.0,0.0,0.0,0.0,0.0,0.0,0.0
MG: Putative 2-hydroxyacid dehydrogenase HI_1556 OS=Haemophilus influenzae (strain ATCC 51907 / DSM 11121 / KW20 / Rd) GN=HI_1556 PE=1 SV=1 [P45250] Score: 231.0	K00018	1.-.-.-	0.0,0.0,0.0,0.0,1.0,0.0,1.0,0.0,0.0,3.0,2.0,1.0,0.0,1.0,0.0,0.0,1.0,3.0,4.0,0.0,0.0,0.0,0.0,0.0,1.0,1.0,1.0,2.0,0.0,0.0,0.0,0.0,0.0,0.0,0.0,0.0,0.0,0.0,0.0,1.0,0.0,0.0,0.0,0.0
MG: Peroxide stress-activated histidine kinase mak3 OS=Schizosaccharomyces pombe (strain 972 / ATCC 24843) GN=mak3 PE=1 SV=1 [O74539] Score: 144.0	UNKNOWN	2.7.13.3	0.0,0.0,0.0,0.0,0.0,0.0,0.0,0.0,0.0,0.0,0.0,0.0,0.0,0.0,0.0,0.0,0.0,0.0,0.0,0.0,0.0,0.0,0.0,0.0,0.0,0.0,0.0,0.0,0.0,0.0,0.0,0.0,0.0,0.0,0.0,0.0,0.0,0.0,0.0,1.0,0.0,0.0,0.0,0.0
MNMC_BURP8 tRNA 5-methylaminomethyl-2-thiouridine biosynthesis bifunctional protein MnmC OS=Burkholderia phymatum (strain DSM 17167 / STM815) GN=mnmC PE=3 SV=1	K15461	1.5.-.-,2.1.1.61	0.0,0.0,0.0,0.0,0.0,0.0,0.0,0.0,0.0,0.0,0.0,0.0,0.0,0.0,0.0,0.0,0.0,0.0,0.0,0.0,0.0,0.0,0.0,0.0,0.0,0.0,0.0,0.0,0.0,1.0,0.0,0.0,0.0,0.0,0.0,0.0,0.0,0.0,0.0,1.0,0.0,0.0,0.0,0.0
BUD3_SCHOC Bud site selection protein 3 (Fragment) OS=Schwanniomyces occidentalis GN=BUD3 PE=3 SV=2	UNKNOWN	UNKNOWN	0.0,0.0,0.0,0.0,0.0,0.0,0.0,0.0,0.0,0.0,0.0,0.0,0.0,1.0,0.0,0.0,0.0,0.0,0.0,0.0,0.0,0.0,0.0,0.0,0.0,0.0,0.0,0.0,0.0,0.0,0.0,0.0,2.0,0.0,0.0,0.0,0.0,0.0,1.0,1.0,0.0,0.0,0.0,0.0
Y1002_METMJ UPF0290 protein Memar_1002 OS=Methanoculleus marisnigri (strain ATCC 35101 / DSM 1498 / JR1) GN=Memar_1002 PE=3 SV=1	K19664	2.7.7.67	0.0,0.0,0.0,0.0,0.0,0.0,0.0,0.0,0.0,0.0,0.0,0.0,0.0,0.0,0.0,0.0,0.0,0.0,0.0,0.0,0.0,0.0,0.0,0.0,0.0,0.0,0.0,0.0,0.0,0.0,0.0,0.0,0.0,0.0,0.0,0.0,0.0,0.0,0.0,1.0,0.0,0.0,0.0,0.0
TONSL_DROME Tonsoku-like protein OS=Drosophila melanogaster GN=CG7457 PE=1 SV=1	K09257	UNKNOWN	0.0,0.0,0.0,0.0,0.0,0.0,0.0,0.0,0.0,0.0,0.0,0.0,0.0,0.0,0.0,0.0,0.0,0.0,0.0,1.0,0.0,0.0,0.0,0.0,0.0,0.0,0.0,0.0,0.0,0.0,0.0,0.0,0.0,0.0,0.0,0.0,0.0,0.0,0.0,0.0,0.0,0.0,0.0,0.0
NSMA_HUMAN Sphingomyelin phosphodiesterase 2 OS=Homo sapiens GN=SMPD2 PE=1 SV=2	K12351	3.1.4.12	0.0,0.0,0.0,0.0,0.0,0.0,0.0,0.0,0.0,0.0,0.0,2.0,0.0,0.0,0.0,0.0,0.0,0.0,0.0,0.0,0.0,0.0,0.0,0.0,0.0,0.0,0.0,0.0,0.0,0.0,0.0,0.0,0.0,0.0,0.0,0.0,0.0,0.0,0.0,0.0,0.0,0.0,0.0,0.0
SDCB2_MOUSE Syntenin-2 OS=Mus musculus GN=Sdcbp2 PE=2 SV=1	UNKNOWN	UNKNOWN	0.0,0.0,0.0,0.0,0.0,0.0,0.0,0.0,0.0,0.0,1.0,0.0,0.0,0.0,0.0,0.0,0.0,1.0,0.0,0.0,0.0,0.0,0.0,0.0,0.0,0.0,0.0,0.0,0.0,0.0,0.0,0.0,0.0,0.0,0.0,0.0,0.0,0.0,0.0,0.0,0.0,0.0,0.0,0.0
PARG_RAT Poly(ADP-ribose) glycohydrolase OS=Rattus norvegicus GN=Parg PE=1 SV=1	K07759	3.2.1.143	0.0,0.0,0.0,0.0,0.0,0.0,0.0,0.0,0.0,0.0,0.0,0.0,0.0,0.0,0.0,0.0,0.0,0.0,0.0,0.0,0.0,0.0,0.0,0.0,1.0,0.0,0.0,0.0,0.0,0.0,0.0,0.0,0.0,0.0,0.0,0.0,0.0,0.0,0.0,0.0,0.0,0.0,0.0,0.0
RL10_PEPD6 50S ribosomal protein L10 OS=Peptoclostridium difficile (strain 630) GN=rplJ PE=3 SV=1	K02864	UNKNOWN	0.0,0.0,0.0,0.0,0.0,1.0,1.0,0.0,0.0,0.0,0.0,0.0,0.0,0.0,0.0,0.0,0.0,0.0,0.0,0.0,0.0,0.0,0.0,0.0,0.0,0.0,0.0,0.0,0.0,0.0,0.0,0.0,0.0,0.0,0.0,0.0,0.0,0.0,0.0,2.0,0.0,0.0,0.0,0.0
ZIP8_ORYSJ Zinc transporter 8 OS=Oryza sativa subsp. japonica GN=ZIP8 PE=2 SV=1	K14709	UNKNOWN	0.0,0.0,0.0,0.0,0.0,0.0,0.0,0.0,0.0,0.0,0.0,0.0,0.0,0.0,0.0,0.0,0.0,0.0,0.0,0.0,0.0,0.0,0.0,0.0,0.0,0.0,0.0,0.0,0.0,0.0,0.0,0.0,0.0,0.0,0.0,0.0,0.0,0.0,0.0,0.0,0.0,0.0,0.0,1.0
MG: Phosphate acyltransferase OS=Dictyoglomus turgidum (strain Z-1310 / DSM 6724) GN=plsX PE=3 SV=1 [B8E0Y4] Score: 214.0	K03621	2.3.1.n2	0.0,0.0,0.0,0.0,0.0,0.0,0.0,0.0,0.0,0.0,0.0,0.0,0.0,0.0,0.0,0.0,0.0,0.0,0.0,0.0,0.0,0.0,0.0,0.0,0.0,1.0,0.0,0.0,0.0,0.0,0.0,0.0,0.0,0.0,0.0,0.0,0.0,0.0,0.0,0.0,0.0,0.0,0.0,0.0
MG: Phosphate-binding protein PstS OS=Staphylococcus epidermidis (strain ATCC 12228) GN=pstS PE=3 SV=1 [Q8CP98] Score: 114.0	K02040	UNKNOWN	182.0,208.0,92.0,82.0,208.0,244.0,87.0,134.0,75.0,41.0,32.0,19.0,8.0,13.0,11.0,6.0,5.0,14.0,2.0,4.0,12.0,17.0,13.0,11.0,56.0,59.0,54.0,39.0,153.0,131.0,96.0,121.0,41.0,38.0,57.0,54.0,78.0,92.0,163.0,118.0,2.0,7.0,8.0,44.0
RAB3A_HUMAN Ras-related protein Rab-3A OS=Homo sapiens GN=RAB3A PE=1 SV=1	K07882	UNKNOWN	0.0,0.0,0.0,0.0,0.0,0.0,0.0,0.0,0.0,0.0,1.0,1.0,0.0,0.0,0.0,0.0,0.0,0.0,0.0,0.0,0.0,0.0,0.0,0.0,0.0,0.0,0.0,0.0,0.0,0.0,0.0,0.0,0.0,0.0,0.0,0.0,0.0,0.0,1.0,1.0,1.0,0.0,0.0,0.0
MG: DNA polymerase II small subunit OS=Methanothermobacter thermautotrophicus (strain ATCC 29096 / DSM 1053 / JCM 10044 / NBRC 100330 / Delta H) GN=polB PE=3 SV=1 [O27456] Score: 635.0	UNKNOWN	2.7.7.7	0.0,1.0,0.0,0.0,0.0,0.0,0.0,0.0,0.0,0.0,0.0,0.0,0.0,0.0,0.0,0.0,0.0,0.0,0.0,0.0,0.0,0.0,0.0,0.0,0.0,0.0,0.0,0.0,0.0,0.0,0.0,0.0,0.0,0.0,0.0,0.0,0.0,0.0,0.0,0.0,0.0,0.0,0.0,0.0
YH51_SCHPO TBC domain-containing protein C215.01 OS=Schizosaccharomyces pombe (strain 972 / ATCC 24843) GN=SPBC215.01 PE=3 SV=4	K19951	UNKNOWN	0.0,0.0,0.0,0.0,0.0,0.0,0.0,0.0,0.0,0.0,1.0,0.0,0.0,0.0,0.0,0.0,0.0,0.0,0.0,0.0,0.0,0.0,0.0,0.0,0.0,0.0,0.0,0.0,0.0,0.0,0.0,0.0,0.0,0.0,0.0,0.0,0.0,0.0,0.0,0.0,0.0,0.0,0.0,0.0
MG: UvrABC system protein A OS=Aquifex aeolicus (strain VF5) GN=uvrA PE=3 SV=1 [O66911] Score: 152.0	K03701	UNKNOWN	0.0,0.0,0.0,0.0,0.0,0.0,0.0,0.0,0.0,0.0,0.0,0.0,0.0,0.0,0.0,0.0,0.0,0.0,0.0,0.0,1.0,0.0,0.0,0.0,0.0,0.0,0.0,0.0,0.0,0.0,0.0,0.0,0.0,0.0,0.0,0.0,0.0,0.0,0.0,0.0,0.0,0.0,0.0,0.0
MG: UPF0053 protein sll0260 OS=Synechocystis sp. (strain PCC 6803 / Kazusa) GN=sll0260 PE=3 SV=1 [P74409] Score: 266.0	K03699	UNKNOWN	0.0,0.0,0.0,0.0,0.0,0.0,0.0,0.0,0.0,0.0,0.0,0.0,0.0,1.0,0.0,0.0,0.0,0.0,0.0,0.0,0.0,1.0,0.0,0.0,0.0,0.0,0.0,0.0,0.0,0.0,0.0,0.0,0.0,1.0,0.0,0.0,0.0,0.0,0.0,0.0,0.0,0.0,1.0,0.0
MG: Uncharacterized inner membrane transporter yiJE OS=Escherichia coli O6:H1 (strain CFT073 / ATCC 700928 / UPEC) GN=yijE PE=3 SV=1 [P0ABT9] Score: 111.0	UNKNOWN	UNKNOWN	0.0,0.0,0.0,0.0,0.0,1.0,0.0,0.0,0.0,0.0,0.0,0.0,0.0,0.0,0.0,0.0,0.0,0.0,0.0,0.0,0.0,0.0,0.0,0.0,0.0,0.0,0.0,0.0,0.0,0.0,0.0,0.0,0.0,0.0,0.0,0.0,0.0,0.0,0.0,0.0,0.0,0.0,0.0,0.0
MG: Xyloglucanase OS=Paenibacillus sp. GN=xeg74 PE=1 SV=1 [Q3MUH7] Score: 159.0	UNKNOWN	3.2.1.-	3.0,4.0,7.0,1.0,0.0,1.0,5.0,5.0,0.0,0.0,0.0,0.0,24.0,20.0,11.0,12.0,13.0,6.0,8.0,15.0,0.0,2.0,1.0,5.0,0.0,0.0,0.0,0.0,2.0,3.0,0.0,1.0,0.0,3.0,5.0,1.0,0.0,0.0,0.0,0.0,0.0,0.0,0.0,0.0
RL5_SHEB9 50S ribosomal protein L5 OS=Shewanella baltica (strain OS195) GN=rplE PE=3 SV=1	K02931	UNKNOWN	0.0,0.0,2.0,0.0,0.0,1.0,2.0,8.0,0.0,0.0,0.0,0.0,0.0,4.0,3.0,3.0,1.0,1.0,0.0,0.0,2.0,0.0,4.0,2.0,0.0,0.0,0.0,0.0,0.0,2.0,0.0,0.0,0.0,0.0,0.0,0.0,1.0,0.0,0.0,2.0,0.0,0.0,9.0,0.0
MG: Mycosubtilin synthase subunit A OS=Bacillus subtilis GN=mycA PE=3 SV=1 [Q9R9J1] Score: 140.0	UNKNOWN	2.3.1.-	0.0,0.0,0.0,0.0,0.0,0.0,0.0,0.0,0.0,0.0,0.0,0.0,0.0,0.0,0.0,0.0,0.0,0.0,0.0,0.0,0.0,0.0,0.0,0.0,0.0,0.0,1.0,0.0,0.0,0.0,0.0,0.0,1.0,0.0,0.0,0.0,0.0,0.0,0.0,0.0,0.0,0.0,0.0,0.0
MG: Phosphoglycolate phosphatase 1 OS=Pseudomonas aeruginosa (strain ATCC 15692 / PAO1 / 1C / PRS 101 / LMG 12228) GN=gph1 PE=3 SV=1 [Q9S586] Score: 54.3	K01091	3.1.3.18	3.0,4.0,0.0,0.0,3.0,3.0,2.0,3.0,0.0,0.0,1.0,1.0,0.0,0.0,0.0,0.0,0.0,0.0,0.0,0.0,0.0,0.0,0.0,0.0,0.0,1.0,0.0,0.0,9.0,7.0,0.0,0.0,3.0,3.0,0.0,3.0,1.0,8.0,1.0,2.0,1.0,0.0,0.0,0.0
MED13_DROME Mediator of RNA polymerase II transcription subunit 13 OS=Drosophila melanogaster GN=skd PE=1 SV=1	K15164	UNKNOWN	0.0,0.0,0.0,0.0,0.0,0.0,1.0,0.0,0.0,0.0,0.0,0.0,0.0,0.0,0.0,0.0,0.0,0.0,0.0,0.0,0.0,0.0,0.0,0.0,0.0,0.0,0.0,0.0,0.0,0.0,0.0,0.0,0.0,0.0,0.0,0.0,0.0,0.0,0.0,0.0,0.0,0.0,0.0,0.0
MG: Alkyl hydroperoxide reductase subunit C OS=Staphylococcus saprophyticus subsp. saprophyticus (strain ATCC 15305 / DSM 20229) GN=ahpC PE=3 SV=1 [Q49UT8] Score: 221.0	K03386	1.11.1.15	0.0,0.0,10.0,6.0,0.0,0.0,1.0,0.0,0.0,0.0,0.0,1.0,5.0,12.0,11.0,10.0,9.0,7.0,5.0,16.0,1.0,0.0,0.0,0.0,0.0,0.0,0.0,0.0,0.0,0.0,0.0,0.0,0.0,1.0,0.0,0.0,6.0,2.0,1.0,1.0,0.0,0.0,16.0,7.0
GRA7_TOXGO Dense granule protein 7 OS=Toxoplasma gondii GN=GRA7 PE=1 SV=1	UNKNOWN	UNKNOWN	0.0,0.0,0.0,0.0,0.0,0.0,0.0,0.0,0.0,0.0,0.0,0.0,0.0,0.0,0.0,0.0,0.0,0.0,0.0,0.0,0.0,0.0,0.0,0.0,0.0,0.0,0.0,0.0,0.0,0.0,0.0,0.0,0.0,0.0,1.0,0.0,0.0,0.0,0.0,0.0,0.0,0.0,0.0,0.0
RAB26_RAT Ras-related protein Rab-26 OS=Rattus norvegicus GN=Rab26 PE=2 SV=2	K07913	UNKNOWN	0.0,0.0,0.0,0.0,0.0,0.0,0.0,0.0,0.0,0.0,1.0,1.0,0.0,0.0,0.0,0.0,0.0,0.0,0.0,0.0,0.0,0.0,0.0,0.0,0.0,0.0,0.0,0.0,0.0,0.0,0.0,0.0,0.0,0.0,0.0,0.0,0.0,0.0,1.0,1.0,1.0,0.0,0.0,0.0
MG: Thioredoxin reductase OS=Staphylococcus epidermidis (strain ATCC 35984 / RP62A) GN=trxB PE=3 SV=1 [Q5HQW4] Score: 162.0	K00384	1.8.1.9	3.0,2.0,0.0,0.0,6.0,4.0,0.0,0.0,1.0,0.0,1.0,0.0,0.0,0.0,0.0,0.0,0.0,0.0,0.0,0.0,1.0,1.0,0.0,0.0,0.0,0.0,0.0,0.0,0.0,0.0,0.0,0.0,2.0,1.0,0.0,0.0,1.0,0.0,0.0,2.0,0.0,0.0,0.0,0.0
PLSX_VIBFM Phosphate acyltransferase OS=Vibrio fischeri (strain MJ11) GN=plsX PE=3 SV=1	K03621	2.3.1.n2	0.0,0.0,0.0,0.0,0.0,0.0,0.0,0.0,0.0,0.0,0.0,0.0,0.0,0.0,0.0,0.0,0.0,1.0,0.0,0.0,0.0,0.0,0.0,0.0,0.0,0.0,0.0,0.0,0.0,0.0,0.0,0.0,0.0,0.0,0.0,0.0,0.0,0.0,0.0,0.0,0.0,0.0,0.0,0.0
MG: Uncharacterized protein YyaC OS=Bacillus subtilis (strain 168) GN=yyaC PE=4 SV=1 [P37521] Score: 144.0	UNKNOWN	UNKNOWN	0.0,0.0,0.0,0.0,0.0,0.0,0.0,0.0,0.0,0.0,0.0,0.0,0.0,0.0,0.0,0.0,0.0,0.0,0.0,0.0,0.0,0.0,0.0,0.0,0.0,0.0,0.0,0.0,0.0,1.0,0.0,0.0,0.0,0.0,0.0,0.0,0.0,0.0,0.0,0.0,0.0,0.0,1.0,0.0
TRPD_PYRAR Anthranilate phosphoribosyltransferase OS=Pyrobaculum arsenaticum (strain DSM 13514 / JCM 11321) GN=trpD PE=3 SV=1	K00766	2.4.2.18	0.0,0.0,0.0,0.0,0.0,0.0,1.0,0.0,0.0,0.0,0.0,0.0,0.0,0.0,0.0,0.0,0.0,0.0,0.0,0.0,0.0,0.0,0.0,0.0,0.0,0.0,0.0,0.0,0.0,0.0,0.0,0.0,0.0,0.0,0.0,0.0,0.0,0.0,0.0,0.0,0.0,0.0,0.0,0.0
SLU7_CRYNJ Pre-mRNA-splicing factor SLU7 OS=Cryptococcus neoformans var. neoformans serotype D (strain JEC21 / ATCC MYA-565) GN=SLU7 PE=3 SV=1	K12819	UNKNOWN	0.0,0.0,0.0,0.0,0.0,0.0,0.0,0.0,0.0,0.0,0.0,0.0,0.0,0.0,0.0,2.0,0.0,0.0,0.0,0.0,0.0,0.0,0.0,0.0,0.0,0.0,0.0,0.0,0.0,0.0,0.0,0.0,0.0,0.0,0.0,0.0,0.0,0.0,0.0,0.0,0.0,0.0,0.0,0.0
MG: Acetyl-CoA acetyltransferase OS=Bacillus subtilis (strain 168) GN=mmgA PE=2 SV=2 [P45855] Score: 435.0	K00626	2.3.1.9	11.0,10.0,4.0,0.0,8.0,11.0,32.0,32.0,18.0,29.0,3.0,0.0,6.0,9.0,26.0,1.0,10.0,12.0,20.0,3.0,2.0,3.0,1.0,4.0,1.0,5.0,1.0,1.0,3.0,0.0,0.0,0.0,1.0,2.0,7.0,6.0,0.0,0.0,6.0,3.0,1.0,0.0,3.0,3.0
MG: Uncharacterized solute-binding protein Pmob_0379 OS=Petrotoga mobilis (strain DSM 10674 / SJ95) GN=Pmob_0379 PE=3 SV=1 [A9BF57] Score: 302.0	K15495	UNKNOWN	0.0,0.0,0.0,0.0,0.0,0.0,0.0,0.0,0.0,0.0,0.0,0.0,0.0,0.0,0.0,1.0,0.0,0.0,0.0,0.0,0.0,0.0,0.0,0.0,0.0,0.0,0.0,0.0,0.0,0.0,0.0,0.0,0.0,0.0,0.0,0.0,0.0,0.0,0.0,0.0,0.0,0.0,0.0,0.0
ELAB_ECOLI Protein ElaB OS=Escherichia coli (strain K12) GN=elaB PE=1 SV=1	K05594	UNKNOWN	0.0,0.0,0.0,0.0,0.0,0.0,0.0,0.0,0.0,0.0,0.0,0.0,0.0,0.0,0.0,0.0,0.0,0.0,0.0,0.0,0.0,0.0,0.0,0.0,0.0,0.0,0.0,0.0,0.0,0.0,0.0,0.0,0.0,0.0,0.0,0.0,0.0,0.0,0.0,0.0,0.0,0.0,4.0,1.0
TRXR2_RAT Thioredoxin reductase 2, mitochondrial OS=Rattus norvegicus GN=Txnrd2 PE=1 SV=3	K00384	1.8.1.9	0.0,0.0,0.0,0.0,0.0,0.0,0.0,0.0,0.0,0.0,0.0,0.0,0.0,0.0,0.0,0.0,0.0,0.0,0.0,0.0,0.0,0.0,0.0,0.0,0.0,0.0,0.0,0.0,1.0,0.0,0.0,0.0,0.0,0.0,0.0,0.0,0.0,0.0,0.0,0.0,0.0,0.0,0.0,0.0
MG: HTH-type transcriptional regulator GlvR OS=Bacillus subtilis (strain 168) GN=glvR PE=2 SV=1 [P54717] Score: 209.0	K03481	UNKNOWN	0.0,1.0,0.0,0.0,0.0,0.0,0.0,0.0,0.0,0.0,0.0,0.0,0.0,0.0,0.0,0.0,0.0,0.0,0.0,0.0,0.0,0.0,0.0,0.0,0.0,0.0,0.0,0.0,0.0,0.0,0.0,0.0,0.0,0.0,0.0,0.0,0.0,0.0,0.0,0.0,0.0,0.0,0.0,0.0
MG: Alpha-galactosidase OS=Rhizobium meliloti (strain 1021) GN=melA PE=3 SV=1 [Q9X4Y0] Score: 366.0	K07406	3.2.1.22	0.0,0.0,0.0,0.0,0.0,0.0,0.0,0.0,0.0,0.0,0.0,0.0,1.0,0.0,0.0,0.0,0.0,0.0,0.0,0.0,0.0,0.0,0.0,0.0,0.0,0.0,0.0,0.0,0.0,0.0,0.0,0.0,0.0,0.0,0.0,0.0,0.0,0.0,0.0,0.0,0.0,0.0,0.0,0.0
MG: N utilization substance protein B homolog OS=Desulfotomaculum reducens (strain MI-1) GN=nusB PE=3 SV=1 [A4J3F1] Score: 127.0	K03625	UNKNOWN	0.0,0.0,0.0,0.0,0.0,0.0,0.0,0.0,0.0,0.0,0.0,0.0,0.0,0.0,0.0,0.0,0.0,0.0,0.0,0.0,0.0,0.0,0.0,0.0,0.0,0.0,0.0,1.0,0.0,0.0,0.0,0.0,0.0,0.0,0.0,0.0,0.0,0.0,0.0,0.0,0.0,0.0,0.0,0.0
SCRN2_MOUSE Secernin-2 OS=Mus musculus GN=Scrn2 PE=1 SV=1	K14358	UNKNOWN	0.0,0.0,0.0,0.0,0.0,0.0,0.0,0.0,0.0,0.0,0.0,0.0,0.0,0.0,0.0,0.0,0.0,0.0,0.0,0.0,0.0,0.0,0.0,0.0,0.0,0.0,0.0,0.0,0.0,0.0,0.0,0.0,0.0,0.0,0.0,0.0,0.0,0.0,1.0,0.0,0.0,0.0,0.0,0.0
KAD_ORITI Adenylate kinase OS=Orientia tsutsugamushi (strain Ikeda) GN=adk PE=3 SV=1	K00939	2.7.4.3	0.0,0.0,0.0,0.0,0.0,0.0,0.0,0.0,0.0,0.0,0.0,0.0,0.0,0.0,0.0,1.0,0.0,0.0,0.0,0.0,0.0,0.0,0.0,0.0,0.0,0.0,0.0,0.0,0.0,0.0,0.0,0.0,0.0,0.0,0.0,0.0,0.0,0.0,0.0,0.0,0.0,0.0,0.0,0.0
MG: DNA-directed RNA polymerase subunit N OS=Methanoculleus marisnigri (strain ATCC 35101 / DSM 1498 / JR1) GN=rpoN PE=3 SV=1 [A3CWI3] Score: 122.0	K03058	2.7.7.6	0.0,0.0,0.0,0.0,0.0,0.0,0.0,0.0,0.0,0.0,0.0,0.0,0.0,0.0,0.0,0.0,0.0,0.0,0.0,0.0,0.0,0.0,0.0,0.0,0.0,0.0,0.0,0.0,0.0,0.0,0.0,0.0,0.0,0.0,0.0,0.0,0.0,0.0,0.0,1.0,0.0,0.0,0.0,0.0
BIOW_PERMH 6-carboxyhexanoate--CoA ligase OS=Persephonella marina (strain DSM 14350 / EX-H1) GN=bioW PE=3 SV=1	K01906	6.2.1.14	0.0,0.0,0.0,0.0,0.0,0.0,0.0,0.0,0.0,0.0,0.0,0.0,0.0,1.0,0.0,0.0,0.0,0.0,0.0,0.0,0.0,0.0,0.0,0.0,0.0,0.0,0.0,0.0,0.0,0.0,0.0,0.0,0.0,0.0,0.0,0.0,0.0,0.0,0.0,0.0,0.0,0.0,0.0,0.0
MG: 50S ribosomal protein L30 OS=Alkaliphilus oremlandii (strain OhILAs) GN=rpmD PE=3 SV=1 [A8MLF8] Score: 76.3	K02907	UNKNOWN	0.0,0.0,0.0,0.0,0.0,0.0,0.0,0.0,0.0,0.0,0.0,0.0,1.0,0.0,0.0,0.0,0.0,0.0,0.0,0.0,0.0,0.0,0.0,0.0,0.0,0.0,0.0,0.0,0.0,0.0,0.0,0.0,0.0,0.0,0.0,0.0,2.0,0.0,0.0,0.0,0.0,0.0,0.0,0.0
MG: 2-amino-3-carboxymuconate-6-semialdehyde decarboxylase OS=Dictyostelium discoideum GN=acmsd PE=3 SV=1 [Q54LN9] Score: 56.6	K03392	4.1.1.45	0.0,1.0,0.0,0.0,0.0,0.0,0.0,0.0,0.0,0.0,0.0,0.0,0.0,0.0,0.0,0.0,0.0,0.0,0.0,0.0,1.0,0.0,0.0,2.0,0.0,0.0,0.0,0.0,0.0,0.0,4.0,2.0,0.0,0.0,0.0,0.0,0.0,1.0,0.0,0.0,0.0,0.0,0.0,0.0
SPR1A_HUMAN Cornifin-A OS=Homo sapiens GN=SPRR1A PE=1 SV=2	UNKNOWN	UNKNOWN	0.0,0.0,0.0,1.0,0.0,0.0,0.0,0.0,0.0,0.0,0.0,0.0,0.0,0.0,0.0,0.0,0.0,0.0,0.0,0.0,0.0,0.0,0.0,0.0,0.0,0.0,0.0,0.0,0.0,0.0,0.0,0.0,0.0,0.0,0.0,0.0,0.0,0.0,0.0,0.0,0.0,0.0,0.0,0.0
MG: Protein translocase subunit SecY OS=Chlamydia trachomatis (strain D/UW-3/Cx) GN=secY PE=3 SV=3 [P28539] Score: 255.0	K03076	UNKNOWN	0.0,0.0,0.0,0.0,0.0,0.0,0.0,0.0,0.0,0.0,0.0,0.0,0.0,0.0,0.0,0.0,0.0,0.0,0.0,0.0,0.0,0.0,0.0,0.0,0.0,0.0,0.0,0.0,0.0,0.0,0.0,0.0,0.0,0.0,0.0,0.0,0.0,0.0,0.0,2.0,0.0,0.0,0.0,0.0
MG: 4-O-methyl-glucuronoyl methylesterase OS=Hypocrea jecorina (strain QM6a) GN=cip2 PE=1 SV=1 [G0RV93] Score: 381.0	UNKNOWN	3.1.1.-	0.0,0.0,4.0,0.0,0.0,0.0,0.0,0.0,0.0,0.0,2.0,0.0,0.0,0.0,0.0,0.0,0.0,0.0,0.0,0.0,0.0,2.0,0.0,0.0,0.0,0.0,0.0,0.0,0.0,3.0,0.0,0.0,0.0,0.0,0.0,0.0,8.0,0.0,0.0,0.0,0.0,0.0,0.0,0.0
RRP44_MOUSE Exosome complex exonuclease RRP44 OS=Mus musculus GN=Dis3 PE=1 SV=4	K12585	3.1.26.-,3.1.13.-	0.0,0.0,0.0,0.0,0.0,0.0,0.0,0.0,0.0,0.0,0.0,0.0,0.0,0.0,0.0,0.0,0.0,0.0,0.0,0.0,0.0,0.0,0.0,0.0,0.0,0.0,0.0,0.0,0.0,0.0,0.0,0.0,0.0,0.0,0.0,0.0,0.0,0.0,0.0,0.0,0.0,3.0,0.0,0.0
MG: Cell cycle protein GpsB OS=Bacillus pumilus (strain SAFR-032) GN=gpsB PE=3 SV=1 [A8FEF4] Score: 81.6	UNKNOWN	UNKNOWN	0.0,0.0,0.0,0.0,0.0,0.0,0.0,0.0,0.0,0.0,0.0,0.0,0.0,0.0,0.0,0.0,0.0,0.0,0.0,0.0,0.0,0.0,0.0,0.0,0.0,0.0,0.0,0.0,0.0,0.0,0.0,0.0,0.0,0.0,0.0,0.0,0.0,0.0,1.0,0.0,0.0,0.0,0.0,0.0
MG: Capsular polysaccharide phosphotransferase WcwK OS=Streptococcus pneumoniae GN=wcwK PE=3 SV=1 [Q4K0S9] Score: 122.0	UNKNOWN	2.7.-.-	0.0,0.0,0.0,0.0,0.0,0.0,0.0,0.0,0.0,0.0,0.0,0.0,0.0,0.0,0.0,0.0,0.0,0.0,0.0,0.0,0.0,0.0,0.0,0.0,0.0,0.0,0.0,0.0,0.0,0.0,0.0,0.0,0.0,0.0,0.0,0.0,0.0,0.0,1.0,1.0,0.0,0.0,0.0,0.0
MG: Minor head structural component GP7 OS=Bacillus phage SPP1 GN=7 PE=4 SV=2 [Q38442] Score: 137.0	UNKNOWN	UNKNOWN	2.0,0.0,0.0,0.0,0.0,0.0,0.0,0.0,0.0,0.0,0.0,0.0,1.0,0.0,0.0,0.0,0.0,0.0,0.0,0.0,0.0,0.0,0.0,0.0,0.0,0.0,0.0,0.0,0.0,0.0,0.0,0.0,0.0,0.0,0.0,1.0,0.0,0.0,0.0,0.0,0.0,0.0,0.0,0.0
RS6_ENT38 30S ribosomal protein S6 OS=Enterobacter sp. (strain 638) GN=rpsF PE=3 SV=1	K02990	UNKNOWN	0.0,0.0,1.0,0.0,0.0,0.0,0.0,0.0,0.0,0.0,0.0,0.0,0.0,0.0,0.0,0.0,0.0,0.0,0.0,0.0,0.0,0.0,0.0,0.0,0.0,0.0,0.0,0.0,0.0,0.0,0.0,0.0,0.0,0.0,0.0,0.0,0.0,0.0,0.0,0.0,0.0,0.0,0.0,1.0
MG: HTH-type transcriptional regulator for conjugative element R391 OS=Providencia rettgeri GN=ORF-96 PE=3 SV=1 [Q79RI9] Score: 72.0	UNKNOWN	UNKNOWN	0.0,0.0,0.0,0.0,0.0,0.0,0.0,0.0,0.0,0.0,0.0,0.0,0.0,0.0,0.0,0.0,0.0,0.0,0.0,0.0,0.0,0.0,0.0,0.0,0.0,0.0,0.0,0.0,0.0,0.0,0.0,0.0,0.0,0.0,0.0,0.0,0.0,0.0,0.0,1.0,0.0,0.0,0.0,0.0
MG: Alpha-monoglucosyldiacylglycerol synthase OS=Streptococcus pneumoniae (strain ATCC BAA-255 / R6) GN=spr0982 PE=1 SV=1 [Q8CWR6] Score: 74.7	K19002	2.4.1.157	0.0,0.0,0.0,0.0,0.0,1.0,1.0,0.0,0.0,0.0,0.0,1.0,2.0,0.0,0.0,0.0,0.0,1.0,0.0,0.0,0.0,0.0,0.0,0.0,0.0,0.0,0.0,0.0,2.0,0.0,0.0,1.0,0.0,0.0,0.0,0.0,0.0,0.0,0.0,0.0,0.0,0.0,0.0,0.0
MG: VapC ribonuclease Y4jK OS=Rhizobium sp. (strain NGR234) GN=NGR_a03040 PE=3 SV=1 [P55511] Score: 93.2	K07062	3.1.-.-	0.0,0.0,0.0,0.0,0.0,0.0,0.0,0.0,0.0,0.0,0.0,0.0,0.0,0.0,0.0,0.0,0.0,0.0,0.0,0.0,0.0,0.0,0.0,0.0,0.0,0.0,0.0,0.0,0.0,0.0,0.0,0.0,0.0,0.0,0.0,0.0,1.0,0.0,0.0,0.0,0.0,0.0,0.0,0.0
KCD18_HUMAN BTB/POZ domain-containing protein KCTD18 OS=Homo sapiens GN=KCTD18 PE=2 SV=2	UNKNOWN	UNKNOWN	0.0,0.0,0.0,1.0,0.0,0.0,0.0,0.0,0.0,0.0,0.0,0.0,0.0,0.0,0.0,0.0,0.0,0.0,0.0,0.0,0.0,0.0,0.0,0.0,0.0,0.0,0.0,0.0,0.0,0.0,0.0,0.0,0.0,0.0,0.0,0.0,0.0,0.0,0.0,0.0,0.0,0.0,0.0,0.0
MG: Probable Xaa-Pro aminopeptidase P OS=Laccaria bicolor (strain S238N-H82 / ATCC MYA-4686) GN=AMPP PE=3 SV=1 [B0DZL3] Score: 234.0	K01262	3.4.11.9	0.0,0.0,0.0,0.0,0.0,0.0,0.0,0.0,0.0,0.0,0.0,0.0,0.0,0.0,1.0,0.0,0.0,0.0,0.0,0.0,0.0,0.0,0.0,0.0,1.0,0.0,0.0,0.0,0.0,0.0,0.0,0.0,0.0,0.0,0.0,0.0,0.0,0.0,0.0,0.0,0.0,0.0,0.0,0.0
CISY_THEAC Citrate synthase OS=Thermoplasma acidophilum (strain ATCC 25905 / DSM 1728 / JCM 9062 / NBRC 15155 / AMRC-C165) GN=gltA PE=1 SV=2	K01647	2.3.3.16	0.0,0.0,0.0,0.0,0.0,0.0,1.0,0.0,0.0,0.0,0.0,0.0,0.0,0.0,0.0,0.0,0.0,0.0,0.0,0.0,0.0,0.0,0.0,0.0,0.0,0.0,0.0,0.0,0.0,0.0,0.0,0.0,0.0,0.0,0.0,0.0,0.0,0.0,0.0,0.0,0.0,0.0,0.0,0.0
MG: Uncharacterized protein MJ1519 OS=Methanocaldococcus jannaschii (strain ATCC 43067 / DSM 2661 / JAL-1 / JCM 10045 / NBRC 100440) GN=MJ1519 PE=4 SV=1 [Q58914] Score: 65.9	K03581	UNKNOWN	0.0,0.0,0.0,0.0,1.0,0.0,0.0,0.0,0.0,0.0,0.0,0.0,1.0,0.0,0.0,0.0,0.0,0.0,0.0,0.0,0.0,0.0,0.0,1.0,0.0,0.0,1.0,0.0,0.0,0.0,0.0,0.0,0.0,0.0,0.0,0.0,0.0,0.0,0.0,0.0,0.0,0.0,0.0,0.0
AROKB_THEMA Bifunctional shikimate kinase/3-dehydroquinate synthase OS=Thermotoga maritima (strain ATCC 43589 / MSB8 / DSM 3109 / JCM 10099) GN=aroKB PE=3 SV=1	K13829	2.7.1.71,4.2.3.4	0.0,0.0,0.0,0.0,0.0,0.0,0.0,0.0,0.0,0.0,1.0,0.0,0.0,0.0,0.0,0.0,0.0,0.0,0.0,0.0,0.0,0.0,0.0,0.0,0.0,0.0,0.0,0.0,0.0,0.0,0.0,0.0,0.0,0.0,0.0,0.0,0.0,0.0,0.0,0.0,0.0,0.0,0.0,0.0
MG: Uncharacterized protein MJ0900 OS=Methanocaldococcus jannaschii (strain ATCC 43067 / DSM 2661 / JAL-1 / JCM 10045 / NBRC 100440) GN=MJ0900 PE=3 SV=1 [Q58310] Score: 254.0	K07332	UNKNOWN	0.0,0.0,0.0,0.0,0.0,0.0,5.0,0.0,0.0,0.0,0.0,0.0,0.0,1.0,0.0,0.0,1.0,0.0,0.0,0.0,0.0,0.0,0.0,0.0,0.0,0.0,0.0,0.0,0.0,0.0,0.0,0.0,0.0,0.0,0.0,0.0,0.0,0.0,0.0,1.0,0.0,0.0,0.0,0.0
MG: GTP-sensing transcriptional pleiotropic repressor CodY OS=Brevibacillus brevis (strain 47 / JCM 6285 / NBRC 100599) GN=codY PE=3 SV=1 [C0ZFA5] Score: 180.0	K03706	UNKNOWN	0.0,0.0,0.0,0.0,0.0,0.0,0.0,0.0,0.0,0.0,6.0,0.0,0.0,0.0,0.0,0.0,0.0,0.0,0.0,0.0,0.0,0.0,0.0,0.0,0.0,0.0,0.0,0.0,0.0,0.0,0.0,0.0,0.0,0.0,0.0,0.0,1.0,0.0,0.0,5.0,0.0,0.0,0.0,0.0
LIPG_BOVIN Gastric triacylglycerol lipase OS=Bos taurus GN=LIPF PE=1 SV=1	K14452	3.1.1.3	0.0,0.0,0.0,0.0,0.0,0.0,1.0,0.0,0.0,0.0,0.0,0.0,0.0,0.0,0.0,0.0,0.0,0.0,0.0,0.0,0.0,0.0,0.0,0.0,0.0,0.0,0.0,0.0,0.0,0.0,0.0,0.0,0.0,0.0,0.0,0.0,0.0,0.0,0.0,0.0,0.0,0.0,0.0,0.0
MG: Protein translocase subunit SecA 2 OS=Rhodopirellula baltica (strain SH1) GN=secA2 PE=3 SV=2 [Q7UWI5] Score: 757.0	K03070	UNKNOWN	0.0,0.0,0.0,0.0,0.0,1.0,0.0,0.0,0.0,0.0,0.0,0.0,0.0,0.0,0.0,0.0,0.0,0.0,0.0,0.0,0.0,0.0,0.0,0.0,0.0,0.0,0.0,0.0,0.0,0.0,0.0,0.0,0.0,0.0,0.0,0.0,0.0,0.0,1.0,3.0,0.0,0.0,0.0,0.0
MG: Gluconokinase OS=Bacillus licheniformis GN=gntK PE=3 SV=1 [P46834] Score: 154.0	UNKNOWN	2.7.1.12	0.0,0.0,0.0,0.0,0.0,0.0,0.0,0.0,0.0,0.0,0.0,0.0,0.0,0.0,0.0,0.0,0.0,0.0,0.0,0.0,0.0,0.0,0.0,0.0,0.0,0.0,0.0,0.0,0.0,0.0,0.0,0.0,0.0,0.0,0.0,0.0,0.0,1.0,0.0,0.0,0.0,0.0,0.0,0.0
MG: 6-phosphogluconolactonase OS=Synechocystis sp. (strain PCC 6803 / Kazusa) GN=pgl PE=1 SV=3 [P74618] Score: 154.0	K01057	3.1.1.31	0.0,0.0,0.0,0.0,0.0,0.0,0.0,0.0,0.0,0.0,0.0,0.0,6.0,6.0,4.0,3.0,1.0,3.0,2.0,6.0,0.0,0.0,0.0,0.0,0.0,0.0,0.0,0.0,0.0,0.0,0.0,0.0,0.0,0.0,0.0,0.0,0.0,0.0,0.0,0.0,0.0,0.0,0.0,0.0
MG: Insertion element ISR1 uncharacterized 10 kDa protein A3 OS=Rhizobium sp. PE=3 SV=1 [P17985] Score: 45.8	UNKNOWN	UNKNOWN	0.0,0.0,0.0,0.0,0.0,0.0,0.0,0.0,0.0,0.0,0.0,0.0,1.0,0.0,0.0,0.0,0.0,0.0,0.0,1.0,0.0,0.0,0.0,0.0,0.0,0.0,0.0,0.0,0.0,0.0,0.0,0.0,0.0,0.0,0.0,0.0,0.0,0.0,0.0,0.0,0.0,0.0,0.0,0.0
RLMH_MYCPE Ribosomal RNA large subunit methyltransferase H OS=Mycoplasma penetrans (strain HF-2) GN=rlmH PE=3 SV=1	K00783	2.1.1.177	0.0,0.0,0.0,0.0,0.0,0.0,0.0,0.0,0.0,0.0,0.0,0.0,0.0,0.0,0.0,0.0,0.0,0.0,0.0,0.0,0.0,0.0,0.0,0.0,0.0,0.0,0.0,0.0,0.0,0.0,0.0,0.0,0.0,0.0,0.0,0.0,0.0,0.0,0.0,1.0,0.0,0.0,0.0,0.0
MG: Biotin carboxyl carrier protein of acetyl-CoA carboxylase OS=Bacillus subtilis (strain 168) GN=accB PE=3 SV=2 [P49786] Score: 110.0	K02160	UNKNOWN	0.0,0.0,0.0,0.0,0.0,0.0,0.0,1.0,5.0,5.0,4.0,0.0,0.0,0.0,0.0,0.0,0.0,0.0,0.0,0.0,0.0,1.0,0.0,0.0,0.0,0.0,0.0,0.0,1.0,0.0,2.0,2.0,0.0,0.0,0.0,0.0,1.0,1.0,0.0,0.0,0.0,0.0,0.0,0.0
MG: Uncharacterized protein YcgI OS=Bacillus subtilis (strain 168) GN=ycgI PE=4 SV=4 [O31473] Score: 57.4	K09967	UNKNOWN	0.0,0.0,0.0,0.0,0.0,0.0,0.0,0.0,0.0,0.0,0.0,0.0,0.0,0.0,0.0,0.0,0.0,0.0,0.0,0.0,0.0,0.0,0.0,0.0,0.0,0.0,0.0,0.0,0.0,0.0,0.0,1.0,0.0,0.0,0.0,0.0,0.0,0.0,0.0,0.0,0.0,0.0,0.0,0.0
MG: Homoserine dehydrogenase OS=Corynebacterium glutamicum (strain ATCC 13032 / DSM 20300 / JCM 1318 / LMG 3730 / NCIMB 10025) GN=hom PE=1 SV=1 [P08499] Score: 234.0	K00003	1.1.1.3	0.0,0.0,0.0,0.0,0.0,0.0,1.0,0.0,0.0,0.0,0.0,0.0,2.0,0.0,0.0,0.0,0.0,1.0,0.0,0.0,0.0,0.0,0.0,0.0,0.0,0.0,0.0,0.0,0.0,0.0,0.0,0.0,0.0,0.0,0.0,0.0,0.0,0.0,0.0,0.0,0.0,0.0,0.0,0.0
RDRP_TMVB Replicase large subunit OS=Tobacco mosaic virus (strain B935A) PE=3 SV=1	UNKNOWN	2.7.7.-,2.1.1.-,2.7.7.48,3.6.4.13	0.0,0.0,0.0,0.0,0.0,0.0,0.0,0.0,0.0,0.0,0.0,0.0,0.0,0.0,0.0,1.0,0.0,0.0,0.0,0.0,0.0,0.0,0.0,0.0,0.0,0.0,0.0,0.0,0.0,0.0,0.0,0.0,0.0,0.0,0.0,0.0,0.0,0.0,0.0,0.0,0.0,0.0,0.0,0.0
MG: Bifunctional endo-1,4-beta-xylanase XylA OS=Ruminococcus flavefaciens GN=xynA PE=3 SV=1 [P29126] Score: 252.0	UNKNOWN	3.2.1.8	2.0,2.0,8.0,2.0,0.0,0.0,2.0,0.0,0.0,2.0,2.0,2.0,0.0,0.0,0.0,0.0,0.0,0.0,0.0,0.0,0.0,3.0,0.0,1.0,0.0,0.0,0.0,0.0,1.0,5.0,1.0,1.0,0.0,0.0,0.0,16.0,116.0,101.0,0.0,2.0,0.0,0.0,0.0,2.0
MG: HTH-type transcriptional repressor AllR OS=Escherichia coli O6:K15:H31 (strain 536 / UPEC) GN=allR PE=3 SV=1 [Q0TKD5] Score: 127.0	K10973	UNKNOWN	0.0,0.0,0.0,0.0,0.0,0.0,0.0,0.0,0.0,0.0,0.0,0.0,0.0,0.0,0.0,0.0,0.0,0.0,0.0,0.0,0.0,0.0,0.0,0.0,1.0,1.0,0.0,0.0,1.0,1.0,0.0,0.0,0.0,0.0,0.0,0.0,0.0,0.0,0.0,0.0,0.0,0.0,0.0,0.0
DPOE1_HUMAN DNA polymerase epsilon catalytic subunit A OS=Homo sapiens GN=POLE PE=1 SV=5	K02324	2.7.7.7	0.0,0.0,0.0,0.0,0.0,0.0,0.0,0.0,0.0,0.0,0.0,0.0,0.0,1.0,0.0,0.0,0.0,0.0,0.0,0.0,0.0,0.0,0.0,0.0,0.0,0.0,0.0,0.0,0.0,0.0,0.0,0.0,0.0,0.0,0.0,0.0,0.0,0.0,0.0,0.0,0.0,0.0,0.0,0.0
FSLE_DICDI Frizzled and smoothened-like protein E OS=Dictyostelium discoideum GN=fslE PE=3 SV=1	UNKNOWN	UNKNOWN	0.0,0.0,0.0,0.0,0.0,0.0,0.0,0.0,0.0,0.0,0.0,0.0,0.0,0.0,0.0,0.0,0.0,0.0,0.0,0.0,0.0,0.0,0.0,0.0,0.0,0.0,0.0,0.0,0.0,0.0,0.0,0.0,0.0,0.0,0.0,0.0,0.0,0.0,1.0,0.0,0.0,0.0,0.0,0.0
MG: Ribosome maturation factor RimP OS=Clostridium cellulolyticum (strain ATCC 35319 / DSM 5812 / JCM 6584 / H10) GN=rimP PE=3 SV=1 [B8I6E3] Score: 132.0	K09748	UNKNOWN	0.0,0.0,0.0,0.0,0.0,2.0,0.0,0.0,0.0,0.0,0.0,0.0,0.0,0.0,0.0,0.0,0.0,0.0,0.0,0.0,0.0,0.0,0.0,0.0,0.0,0.0,0.0,0.0,0.0,0.0,0.0,0.0,0.0,0.0,0.0,0.0,0.0,0.0,0.0,0.0,0.0,0.0,0.0,0.0
MG: GTPase Era OS=Geobacter metallireducens (strain GS-15 / ATCC 53774 / DSM 7210) GN=era PE=3 SV=1 [Q39T84] Score: 234.0	K03595	UNKNOWN	0.0,0.0,0.0,0.0,0.0,0.0,0.0,0.0,0.0,0.0,0.0,0.0,3.0,0.0,0.0,0.0,0.0,0.0,0.0,0.0,0.0,0.0,0.0,0.0,0.0,0.0,0.0,0.0,0.0,0.0,0.0,0.0,0.0,0.0,0.0,0.0,0.0,0.0,0.0,0.0,0.0,0.0,0.0,0.0
MG: Uncharacterized protein MJECL04 OS=Methanocaldococcus jannaschii (strain ATCC 43067 / DSM 2661 / JAL-1 / JCM 10045 / NBRC 100440) GN=MJECL04 PE=4 SV=1 [Q60260] Score: 71.6	K06921	UNKNOWN	0.0,0.0,0.0,0.0,0.0,0.0,0.0,0.0,0.0,0.0,0.0,0.0,0.0,0.0,0.0,0.0,0.0,0.0,0.0,0.0,0.0,0.0,0.0,0.0,0.0,0.0,0.0,0.0,0.0,0.0,0.0,0.0,0.0,0.0,1.0,0.0,0.0,0.0,0.0,0.0,0.0,0.0,0.0,0.0
MG: Nucleotide-binding protein ExpZ OS=Bacillus subtilis (strain 168) GN=expZ PE=3 SV=2 [P39115] Score: 248.0	K18231	UNKNOWN	0.0,0.0,0.0,0.0,0.0,0.0,0.0,1.0,0.0,0.0,0.0,0.0,0.0,0.0,0.0,1.0,0.0,0.0,0.0,0.0,0.0,0.0,0.0,0.0,0.0,0.0,0.0,0.0,0.0,0.0,0.0,0.0,0.0,0.0,0.0,0.0,0.0,0.0,0.0,0.0,0.0,0.0,0.0,0.0
MG: Probable transcriptional regulatory protein NT01CX_1819 OS=Clostridium novyi (strain NT) GN=NT01CX_1819 PE=3 SV=1 [A0PZU0] Score: 192.0	UNKNOWN	UNKNOWN	0.0,0.0,0.0,0.0,0.0,0.0,0.0,0.0,0.0,0.0,0.0,0.0,21.0,10.0,10.0,0.0,7.0,8.0,6.0,2.0,0.0,0.0,0.0,0.0,0.0,0.0,0.0,0.0,0.0,0.0,0.0,0.0,0.0,0.0,0.0,0.0,0.0,0.0,0.0,0.0,0.0,0.0,0.0,0.0
MG: Aspartyl/glutamyl-tRNA(Asn/Gln) amidotransferase subunit B OS=Thermotoga sp. (strain RQ2) GN=gatB PE=3 SV=1 [B1LC74] Score: 594.0	K02434	6.3.5.-	0.0,0.0,0.0,0.0,0.0,0.0,0.0,0.0,0.0,0.0,0.0,0.0,0.0,0.0,0.0,0.0,2.0,0.0,0.0,0.0,0.0,0.0,0.0,0.0,0.0,0.0,0.0,0.0,0.0,0.0,0.0,0.0,0.0,0.0,0.0,0.0,0.0,0.0,0.0,0.0,0.0,0.0,2.0,0.0
NDK_PYRAE Nucleoside diphosphate kinase OS=Pyrobaculum aerophilum (strain ATCC 51768 / IM2 / DSM 7523 / JCM 9630 / NBRC 100827) GN=ndk PE=1 SV=1	K00940	2.7.4.6	0.0,0.0,0.0,0.0,0.0,0.0,0.0,0.0,0.0,0.0,1.0,0.0,0.0,1.0,0.0,11.0,5.0,2.0,0.0,5.0,0.0,0.0,0.0,0.0,0.0,0.0,0.0,0.0,0.0,0.0,0.0,0.0,0.0,0.0,0.0,0.0,0.0,0.0,2.0,2.0,0.0,0.0,0.0,0.0
FABZ_THICR 3-hydroxyacyl-[acyl-carrier-protein] dehydratase FabZ OS=Thiomicrospira crunogena (strain XCL-2) GN=fabZ PE=3 SV=2	K02372	4.2.1.59	0.0,0.0,0.0,0.0,0.0,0.0,0.0,1.0,0.0,0.0,0.0,1.0,7.0,6.0,9.0,6.0,13.0,7.0,0.0,7.0,0.0,0.0,0.0,0.0,0.0,0.0,0.0,0.0,0.0,0.0,0.0,0.0,0.0,0.0,0.0,0.0,0.0,0.0,1.0,0.0,2.0,0.0,4.0,2.0
MG: Alanyl-tRNA editing protein AlaX-L OS=Pyrococcus horikoshii (strain ATCC 700860 / DSM 12428 / JCM 9974 / NBRC 100139 / OT-3) GN=alaXL PE=3 SV=1 [O57734] Score: 194.0	K01872	UNKNOWN	0.0,0.0,0.0,0.0,0.0,0.0,0.0,0.0,0.0,0.0,0.0,0.0,0.0,0.0,0.0,0.0,0.0,1.0,0.0,0.0,0.0,0.0,0.0,0.0,0.0,0.0,0.0,0.0,0.0,0.0,0.0,0.0,0.0,0.0,0.0,0.0,0.0,0.0,0.0,0.0,0.0,0.0,0.0,0.0
RS14_TRYBB 40S ribosomal protein S14 OS=Trypanosoma brucei brucei GN=RPS14 PE=3 SV=1	UNKNOWN	UNKNOWN	7.0,7.0,5.0,4.0,6.0,3.0,5.0,3.0,2.0,1.0,1.0,0.0,0.0,0.0,0.0,0.0,2.0,0.0,0.0,0.0,4.0,1.0,5.0,3.0,0.0,0.0,0.0,0.0,1.0,4.0,3.0,2.0,1.0,1.0,4.0,6.0,0.0,0.0,1.0,1.0,0.0,0.0,0.0,0.0
MG: Uridine kinase OS=Bacillus halodurans (strain ATCC BAA-125 / DSM 18197 / FERM 7344 / JCM 9153 / C-125) GN=udk PE=3 SV=1 [Q9KDD8] Score: 226.0	K00876	2.7.1.48	0.0,0.0,0.0,0.0,0.0,0.0,0.0,0.0,0.0,0.0,0.0,0.0,0.0,0.0,0.0,0.0,0.0,0.0,0.0,0.0,0.0,0.0,0.0,0.0,0.0,0.0,0.0,0.0,0.0,0.0,0.0,0.0,0.0,0.0,0.0,0.0,0.0,0.0,0.0,1.0,0.0,0.0,0.0,0.0
GLYC_HRSV5 Major surface glycoprotein G OS=Human respiratory syncytial virus A (strain rsb6190) GN=G PE=3 SV=1	UNKNOWN	UNKNOWN	0.0,0.0,0.0,0.0,0.0,1.0,0.0,0.0,0.0,0.0,0.0,0.0,0.0,0.0,0.0,0.0,0.0,0.0,0.0,0.0,0.0,0.0,0.0,0.0,0.0,0.0,0.0,0.0,0.0,0.0,0.0,0.0,0.0,0.0,0.0,0.0,0.0,0.0,0.0,0.0,0.0,0.0,0.0,0.0
MG: Putative type III restriction-modification system HindVIP enzyme res OS=Haemophilus influenzae (strain ATCC 51907 / DSM 11121 / KW20 / Rd) GN=HI_1055 PE=3 SV=1 [P44105] Score: 266.0	UNKNOWN	3.1.21.5	0.0,0.0,0.0,0.0,0.0,0.0,0.0,0.0,0.0,0.0,0.0,0.0,0.0,0.0,0.0,0.0,0.0,0.0,0.0,0.0,0.0,0.0,0.0,0.0,0.0,0.0,0.0,0.0,0.0,0.0,1.0,0.0,0.0,0.0,0.0,0.0,0.0,0.0,0.0,1.0,0.0,0.0,0.0,0.0
MG: Type III pantothenate kinase OS=Bacillus cereus (strain ATCC 10987 / NRS 248) GN=coaX PE=3 SV=1 [Q73FE2] Score: 245.0	K03525	2.7.1.33	0.0,0.0,0.0,0.0,0.0,0.0,0.0,0.0,0.0,0.0,0.0,0.0,0.0,0.0,0.0,0.0,0.0,0.0,0.0,0.0,0.0,0.0,0.0,0.0,0.0,0.0,0.0,0.0,1.0,0.0,0.0,0.0,0.0,0.0,0.0,0.0,0.0,0.0,0.0,0.0,1.0,0.0,0.0,0.0
RTC5_PICGU Restriction of telomere capping protein 5 OS=Meyerozyma guilliermondii (strain ATCC 6260 / CBS 566 / DSM 6381 / JCM 1539 / NBRC 10279 / NRRL Y-324) GN=RTC5 PE=3 SV=2	UNKNOWN	UNKNOWN	0.0,0.0,0.0,0.0,0.0,0.0,0.0,0.0,0.0,0.0,0.0,0.0,0.0,0.0,0.0,0.0,1.0,0.0,0.0,0.0,0.0,0.0,0.0,0.0,0.0,0.0,0.0,0.0,0.0,0.0,0.0,0.0,0.0,0.0,0.0,0.0,0.0,0.0,0.0,0.0,0.0,0.0,0.0,0.0
MG: NAD-dependent protein deacetylase 1 OS=Pyrobaculum aerophilum (strain ATCC 51768 / IM2 / DSM 7523 / JCM 9630 / NBRC 100827) GN=cobB1 PE=3 SV=1 [Q8ZU41] Score: 210.0	K12410	3.5.1.-	0.0,0.0,0.0,0.0,0.0,0.0,0.0,0.0,0.0,0.0,0.0,0.0,0.0,0.0,0.0,0.0,0.0,0.0,0.0,0.0,0.0,2.0,0.0,0.0,0.0,0.0,0.0,0.0,0.0,0.0,0.0,0.0,0.0,0.0,0.0,0.0,0.0,0.0,0.0,0.0,0.0,0.0,0.0,0.0
MG: Endoribonuclease AbiQ OS=Lactococcus lactis subsp. lactis GN=abiQ PE=1 SV=1 [Q9ZJ19] Score: 56.6	K19167	3.1.-.-	0.0,0.0,0.0,0.0,0.0,0.0,0.0,0.0,0.0,0.0,0.0,0.0,0.0,0.0,0.0,0.0,1.0,0.0,0.0,0.0,0.0,0.0,0.0,0.0,0.0,0.0,0.0,0.0,0.0,0.0,0.0,0.0,0.0,0.0,0.0,0.0,0.0,0.0,0.0,0.0,0.0,0.0,0.0,0.0
SPL2A_BOVIN Short palate, lung and nasal epithelium carcinoma-associated protein 2A OS=Bos taurus GN=SPLUNC2A PE=2 SV=2	UNKNOWN	UNKNOWN	0.0,0.0,0.0,0.0,0.0,0.0,0.0,0.0,0.0,0.0,0.0,0.0,0.0,0.0,0.0,0.0,0.0,0.0,0.0,0.0,0.0,0.0,0.0,2.0,0.0,0.0,0.0,0.0,0.0,0.0,0.0,0.0,0.0,0.0,0.0,0.0,0.0,0.0,0.0,0.0,0.0,0.0,0.0,0.0
MG: Glutamate racemase OS=Desulforudis audaxviator (strain MP104C) GN=murI PE=3 SV=1 [B1I4X2] Score: 207.0	K01776	5.1.1.3	0.0,0.0,0.0,1.0,0.0,0.0,0.0,0.0,0.0,0.0,0.0,0.0,0.0,0.0,0.0,0.0,0.0,0.0,0.0,0.0,0.0,0.0,0.0,0.0,0.0,1.0,0.0,0.0,0.0,0.0,0.0,0.0,0.0,0.0,0.0,0.0,0.0,0.0,0.0,0.0,0.0,0.0,0.0,0.0
MG: 30S ribosomal protein S13 OS=Methanoculleus marisnigri (strain ATCC 35101 / DSM 1498 / JR1) GN=rps13 PE=3 SV=1 [A3CWH6] Score: 265.0	K02952	UNKNOWN	0.0,0.0,0.0,0.0,0.0,0.0,0.0,0.0,0.0,0.0,0.0,0.0,0.0,0.0,0.0,0.0,3.0,2.0,0.0,0.0,0.0,0.0,0.0,0.0,3.0,1.0,0.0,0.0,0.0,0.0,0.0,0.0,0.0,0.0,0.0,0.0,0.0,0.0,0.0,0.0,0.0,0.0,0.0,0.0
MG: Protein YtsP OS=Bacillus subtilis (strain 168) GN=ytsP PE=3 SV=2 [O34553] Score: 182.0	K07170	1.8.4.14	0.0,0.0,0.0,0.0,2.0,0.0,0.0,2.0,8.0,6.0,4.0,6.0,2.0,0.0,2.0,6.0,13.0,4.0,0.0,6.0,1.0,1.0,0.0,0.0,4.0,0.0,0.0,0.0,0.0,0.0,0.0,0.0,0.0,0.0,0.0,0.0,0.0,0.0,3.0,3.0,0.0,0.0,0.0,0.0
MG: Agmatinase OS=Bacillus subtilis (strain 168) GN=speB PE=1 SV=1 [P70999] Score: 253.0	K01480	3.5.3.11	0.0,0.0,0.0,0.0,0.0,0.0,0.0,0.0,0.0,0.0,0.0,0.0,0.0,1.0,0.0,0.0,0.0,0.0,0.0,0.0,0.0,0.0,0.0,0.0,0.0,0.0,0.0,0.0,0.0,0.0,0.0,0.0,0.0,0.0,0.0,0.0,0.0,0.0,0.0,0.0,0.0,0.0,0.0,0.0
MG: Acetyl-CoA acetyltransferase OS=Clostridium acetobutylicum (strain ATCC 824 / DSM 792 / JCM 1419 / LMG 5710 / VKM B-1787) GN=thlA PE=1 SV=1 [P45359] Score: 511.0	K00626	2.3.1.9	113.0,100.0,116.0,75.0,180.0,160.0,339.0,320.0,98.0,93.0,59.0,74.0,98.0,89.0,128.0,49.0,143.0,126.0,128.0,86.0,51.0,71.0,51.0,45.0,50.0,72.0,128.0,107.0,23.0,26.0,58.0,59.0,90.0,73.0,121.0,141.0,42.0,49.0,77.0,38.0,1.0,10.0,26.0,67.0
DGTL1_CLOTE Deoxyguanosinetriphosphate triphosphohydrolase-like protein OS=Clostridium tetani (strain Massachusetts / E88) GN=CTC_02012 PE=3 SV=1	K01129	UNKNOWN	0.0,0.0,0.0,0.0,0.0,0.0,0.0,0.0,0.0,0.0,0.0,0.0,0.0,0.0,0.0,0.0,0.0,0.0,0.0,0.0,1.0,0.0,0.0,0.0,0.0,0.0,0.0,0.0,0.0,0.0,0.0,0.0,0.0,0.0,0.0,0.0,0.0,0.0,0.0,0.0,0.0,0.0,0.0,0.0
MG: TATA-box-binding protein OS=Archaeoglobus fulgidus (strain ATCC 49558 / VC-16 / DSM 4304 / JCM 9628 / NBRC 100126) GN=tbp PE=3 SV=1 [O29874] Score: 217.0	K03120	UNKNOWN	0.0,0.0,0.0,0.0,0.0,1.0,2.0,3.0,3.0,1.0,2.0,2.0,6.0,7.0,4.0,3.0,6.0,0.0,0.0,8.0,0.0,0.0,0.0,0.0,4.0,1.0,0.0,0.0,0.0,0.0,0.0,3.0,0.0,0.0,0.0,0.0,1.0,0.0,3.0,1.0,0.0,0.0,0.0,2.0
MG: Ferric enterobactin transport ATP-binding protein FepC OS=Escherichia coli (strain K12) GN=fepC PE=2 SV=2 [P23878] Score: 172.0	K02013	UNKNOWN	0.0,0.0,0.0,0.0,0.0,0.0,0.0,0.0,0.0,0.0,0.0,0.0,1.0,0.0,0.0,0.0,0.0,0.0,0.0,0.0,0.0,0.0,0.0,0.0,0.0,0.0,0.0,0.0,0.0,0.0,0.0,0.0,0.0,0.0,0.0,0.0,0.0,0.0,0.0,0.0,0.0,0.0,0.0,0.0
DAPD_METFK 2,3,4,5-tetrahydropyridine-2,6-dicarboxylate N-succinyltransferase OS=Methylobacillus flagellatus (strain KT / ATCC 51484 / DSM 6875) GN=dapD PE=3 SV=1	K00674	2.3.1.117	0.0,0.0,0.0,0.0,0.0,0.0,0.0,0.0,0.0,0.0,0.0,0.0,0.0,0.0,0.0,0.0,0.0,0.0,0.0,0.0,0.0,0.0,0.0,0.0,0.0,0.0,0.0,0.0,0.0,0.0,0.0,0.0,0.0,0.0,0.0,0.0,0.0,0.0,0.0,0.0,0.0,0.0,1.0,0.0
MG: Histidine triad nucleotide-binding protein 1 OS=Bos taurus GN=HINT1 PE=1 SV=2 [P62958] Score: 118.0	K02503	3.-.-.-	0.0,0.0,0.0,0.0,0.0,0.0,0.0,0.0,1.0,2.0,3.0,2.0,1.0,2.0,3.0,5.0,3.0,3.0,0.0,5.0,0.0,0.0,0.0,0.0,0.0,0.0,0.0,0.0,0.0,0.0,0.0,0.0,0.0,0.0,4.0,0.0,0.0,0.0,0.0,0.0,0.0,0.0,0.0,0.0
PBIP1_HUMAN Pre-B-cell leukemia transcription factor-interacting protein 1 OS=Homo sapiens GN=PBXIP1 PE=1 SV=1	UNKNOWN	UNKNOWN	0.0,0.0,0.0,0.0,0.0,0.0,0.0,0.0,0.0,0.0,0.0,0.0,0.0,0.0,0.0,0.0,0.0,0.0,0.0,0.0,0.0,0.0,0.0,0.0,0.0,0.0,1.0,0.0,0.0,0.0,0.0,0.0,0.0,0.0,0.0,0.0,0.0,0.0,0.0,0.0,0.0,0.0,0.0,0.0
FABZ_METS4 3-hydroxyacyl-[acyl-carrier-protein] dehydratase FabZ OS=Methylobacterium sp. (strain 4-46) GN=fabZ PE=3 SV=1	K02372	4.2.1.59	0.0,0.0,0.0,0.0,0.0,0.0,0.0,1.0,0.0,0.0,0.0,1.0,49.0,29.0,42.0,31.0,59.0,39.0,1.0,62.0,0.0,1.0,0.0,0.0,0.0,0.0,0.0,0.0,0.0,0.0,0.0,0.0,0.0,0.0,0.0,0.0,0.0,0.0,1.0,0.0,2.0,0.0,4.0,2.0
MG: Sensor histidine kinase YxdK OS=Bacillus subtilis (strain 168) GN=yxdK PE=3 SV=1 [P42422] Score: 134.0	K11633	2.7.13.3	0.0,0.0,0.0,0.0,0.0,0.0,0.0,0.0,0.0,0.0,0.0,0.0,0.0,0.0,0.0,0.0,0.0,0.0,0.0,0.0,0.0,0.0,0.0,0.0,0.0,0.0,0.0,0.0,0.0,0.0,0.0,0.0,0.0,0.0,0.0,0.0,0.0,0.0,0.0,0.0,0.0,2.0,0.0,5.0
RL1_AYWBP 50S ribosomal protein L1 OS=Aster yellows witches'-broom phytoplasma (strain AYWB) GN=rplA PE=3 SV=2	K02863	UNKNOWN	0.0,0.0,0.0,0.0,0.0,0.0,0.0,0.0,0.0,0.0,0.0,0.0,0.0,0.0,0.0,0.0,0.0,0.0,7.0,0.0,0.0,0.0,0.0,0.0,2.0,0.0,0.0,0.0,0.0,0.0,0.0,0.0,0.0,0.0,0.0,0.0,0.0,0.0,0.0,0.0,0.0,0.0,0.0,0.0
PKHM3_XENLA Pleckstrin homology domain-containing family M member 3 OS=Xenopus laevis GN=plekhm3 PE=2 SV=1	UNKNOWN	UNKNOWN	0.0,0.0,0.0,0.0,0.0,0.0,1.0,0.0,0.0,0.0,0.0,0.0,1.0,0.0,0.0,0.0,0.0,0.0,0.0,0.0,0.0,0.0,0.0,0.0,0.0,0.0,0.0,0.0,0.0,0.0,0.0,0.0,0.0,0.0,0.0,0.0,0.0,0.0,0.0,0.0,0.0,0.0,0.0,0.0
MG: Uncharacterized protein MJ1365 OS=Methanocaldococcus jannaschii (strain ATCC 43067 / DSM 2661 / JAL-1 / JCM 10045 / NBRC 100440) GN=MJ1365 PE=4 SV=1 [Q58760] Score: 154.0	UNKNOWN	UNKNOWN	0.0,0.0,0.0,0.0,1.0,0.0,0.0,0.0,0.0,0.0,0.0,0.0,0.0,0.0,0.0,0.0,0.0,0.0,0.0,0.0,0.0,0.0,0.0,0.0,0.0,0.0,0.0,0.0,0.0,0.0,0.0,0.0,0.0,0.0,0.0,0.0,0.0,0.0,0.0,0.0,0.0,0.0,0.0,0.0
4CLL2_ARATH 4-coumarate--CoA ligase-like 2 OS=Arabidopsis thaliana GN=4CLL2 PE=2 SV=2	UNKNOWN	6.2.1.-	0.0,0.0,0.0,0.0,0.0,0.0,0.0,0.0,0.0,0.0,0.0,0.0,0.0,0.0,0.0,0.0,0.0,0.0,0.0,0.0,0.0,0.0,0.0,0.0,0.0,0.0,1.0,0.0,0.0,0.0,0.0,0.0,0.0,0.0,0.0,0.0,0.0,0.0,0.0,0.0,0.0,0.0,0.0,0.0
EFTS_WOLSU Elongation factor Ts OS=Wolinella succinogenes (strain ATCC 29543 / DSM 1740 / LMG 7466 / NCTC 11488 / FDC 602W) GN=tsf PE=3 SV=1	K02357	UNKNOWN	0.0,1.0,0.0,0.0,0.0,0.0,0.0,0.0,0.0,0.0,0.0,0.0,0.0,0.0,0.0,0.0,0.0,0.0,0.0,0.0,0.0,0.0,0.0,0.0,0.0,0.0,0.0,0.0,0.0,0.0,0.0,0.0,1.0,1.0,0.0,1.0,0.0,0.0,1.0,0.0,2.0,0.0,0.0,4.0
TICRR_DANRE Treslin OS=Danio rerio GN=ticrr PE=2 SV=1	UNKNOWN	UNKNOWN	0.0,0.0,0.0,0.0,0.0,0.0,0.0,0.0,0.0,0.0,0.0,0.0,0.0,0.0,0.0,0.0,0.0,0.0,0.0,0.0,0.0,0.0,0.0,0.0,0.0,0.0,0.0,0.0,0.0,0.0,0.0,0.0,1.0,0.0,0.0,0.0,0.0,0.0,0.0,0.0,0.0,0.0,0.0,0.0
MG: Ribosomal protein L11 methyltransferase OS=Bacteroides fragilis (strain ATCC 25285 / DSM 2151 / JCM 11019 / NCTC 9343) GN=prmA PE=3 SV=1 [Q5LEW2] Score: 307.0	K02687	2.1.1.-	0.0,0.0,0.0,0.0,0.0,0.0,0.0,0.0,0.0,0.0,0.0,0.0,4.0,1.0,4.0,8.0,8.0,9.0,7.0,1.0,0.0,0.0,0.0,0.0,0.0,0.0,0.0,0.0,0.0,0.0,0.0,0.0,0.0,0.0,0.0,0.0,0.0,0.0,0.0,0.0,0.0,0.0,0.0,0.0
MG: Vitamin B12-dependent ribonucleotide reductase OS=Streptomyces coelicolor (strain ATCC BAA-471 / A3(2) / M145) GN=nrdJ PE=2 SV=1 [O69981] Score: 623.0	K00525	1.17.4.1	0.0,0.0,0.0,0.0,0.0,0.0,0.0,0.0,0.0,0.0,0.0,0.0,0.0,0.0,0.0,0.0,0.0,0.0,0.0,0.0,0.0,0.0,0.0,0.0,0.0,0.0,0.0,0.0,0.0,0.0,0.0,0.0,0.0,0.0,0.0,1.0,0.0,0.0,0.0,0.0,0.0,1.0,0.0,0.0
YCGP_BACSU Uncharacterized protein YcgP OS=Bacillus subtilis (strain 168) GN=ycgP PE=3 SV=2	UNKNOWN	UNKNOWN	0.0,0.0,0.0,0.0,0.0,0.0,0.0,0.0,0.0,0.0,0.0,0.0,0.0,0.0,0.0,0.0,0.0,0.0,1.0,0.0,0.0,0.0,0.0,0.0,0.0,0.0,0.0,0.0,0.0,0.0,0.0,0.0,0.0,0.0,0.0,0.0,0.0,0.0,0.0,0.0,0.0,0.0,0.0,0.0
RL6_CLOPE 50S ribosomal protein L6 OS=Clostridium perfringens (strain 13 / Type A) GN=rplF PE=3 SV=1	K02933	UNKNOWN	0.0,0.0,0.0,2.0,3.0,4.0,1.0,1.0,0.0,0.0,0.0,0.0,0.0,0.0,1.0,0.0,0.0,0.0,0.0,0.0,0.0,0.0,0.0,0.0,0.0,0.0,0.0,0.0,0.0,3.0,0.0,2.0,0.0,0.0,0.0,0.0,0.0,0.0,0.0,0.0,0.0,0.0,0.0,0.0
DECR2_DANRE Peroxisomal 2,4-dienoyl-CoA reductase OS=Danio rerio GN=decr2 PE=2 SV=1	K13237	1.3.1.34	0.0,0.0,0.0,0.0,0.0,0.0,0.0,0.0,0.0,0.0,0.0,0.0,0.0,0.0,0.0,0.0,0.0,0.0,0.0,0.0,0.0,0.0,0.0,0.0,0.0,0.0,0.0,0.0,0.0,0.0,0.0,0.0,0.0,0.0,0.0,0.0,2.0,0.0,1.0,2.0,0.0,0.0,0.0,0.0
MG: ATP-dependent helicase/nuclease subunit A OS=Natranaerobius thermophilus (strain ATCC BAA-1301 / DSM 18059 / JW/NM-WN-LF) GN=addA PE=3 SV=1 [B2A610] Score: 98.2	K16898	3.1.-.-,3.6.4.12	0.0,0.0,0.0,0.0,0.0,0.0,0.0,0.0,0.0,0.0,0.0,0.0,2.0,0.0,0.0,0.0,0.0,0.0,0.0,0.0,0.0,0.0,0.0,0.0,0.0,0.0,0.0,0.0,0.0,0.0,0.0,0.0,0.0,0.0,0.0,0.0,0.0,0.0,0.0,0.0,0.0,0.0,0.0,0.0
MG: Endoglucanase Z OS=Dickeya dadantii (strain 3937) GN=celZ PE=1 SV=2 [P07103] Score: 210.0	K01179	3.2.1.4	0.0,0.0,0.0,0.0,0.0,0.0,0.0,0.0,0.0,0.0,0.0,0.0,0.0,0.0,0.0,0.0,0.0,0.0,0.0,0.0,0.0,0.0,0.0,0.0,0.0,0.0,0.0,0.0,0.0,0.0,0.0,0.0,0.0,0.0,0.0,1.0,0.0,0.0,0.0,0.0,0.0,0.0,0.0,0.0
UH1BL_XENLA UHRF1-binding protein 1-like OS=Xenopus laevis GN=uhrf1bp1l PE=2 SV=1	UNKNOWN	UNKNOWN	0.0,0.0,0.0,0.0,0.0,0.0,0.0,0.0,0.0,0.0,0.0,0.0,0.0,0.0,0.0,0.0,0.0,0.0,0.0,0.0,0.0,0.0,0.0,1.0,0.0,0.0,0.0,0.0,0.0,0.0,0.0,0.0,0.0,0.0,0.0,0.0,0.0,0.0,0.0,0.0,0.0,0.0,0.0,0.0
MG: Collagenase OS=Porphyromonas gingivalis (strain ATCC BAA-308 / W83) GN=prtC PE=3 SV=1 [P59916] Score: 413.0	K08303	3.4.-.-	0.0,0.0,1.0,0.0,0.0,0.0,0.0,0.0,0.0,0.0,0.0,0.0,0.0,0.0,0.0,0.0,0.0,0.0,0.0,0.0,0.0,0.0,0.0,0.0,0.0,0.0,0.0,0.0,0.0,0.0,0.0,0.0,0.0,0.0,0.0,1.0,0.0,0.0,0.0,0.0,0.0,0.0,0.0,0.0
MG: 50S ribosomal protein L10 OS=Methanococcoides burtonii (strain DSM 6242 / NBRC 107633 / OCM 468 / ACE-M) GN=rpl10 PE=3 SV=1 [Q12UP8] Score: 253.0	K02864	UNKNOWN	0.0,0.0,0.0,0.0,6.0,1.0,0.0,0.0,0.0,0.0,0.0,0.0,1.0,3.0,4.0,0.0,0.0,0.0,0.0,0.0,0.0,0.0,0.0,0.0,11.0,15.0,7.0,7.0,0.0,0.0,0.0,0.0,0.0,0.0,0.0,0.0,0.0,0.0,7.0,7.0,0.0,0.0,0.0,0.0
MG: Cytosine permease OS=Escherichia coli O157:H7 GN=codB PE=3 SV=1 [Q8X691] Score: 85.1	K10974	UNKNOWN	0.0,0.0,0.0,0.0,0.0,0.0,0.0,0.0,0.0,0.0,0.0,0.0,0.0,0.0,0.0,0.0,0.0,0.0,0.0,1.0,0.0,1.0,0.0,0.0,0.0,0.0,0.0,0.0,0.0,0.0,0.0,0.0,0.0,0.0,0.0,0.0,1.0,0.0,0.0,0.0,0.0,1.0,0.0,0.0
RL10_CORU7 50S ribosomal protein L10 OS=Corynebacterium urealyticum (strain ATCC 43042 / DSM 7109) GN=rplJ PE=3 SV=1	K02864	UNKNOWN	0.0,0.0,4.0,4.0,0.0,0.0,0.0,0.0,0.0,0.0,0.0,0.0,0.0,1.0,0.0,0.0,0.0,0.0,0.0,0.0,0.0,0.0,0.0,1.0,0.0,0.0,0.0,0.0,0.0,0.0,0.0,0.0,0.0,0.0,0.0,0.0,0.0,0.0,0.0,0.0,0.0,0.0,0.0,0.0
MG: Uncharacterized protein YfnD OS=Bacillus subtilis (strain 168) GN=yfnD PE=4 SV=1 [O31542] Score: 133.0	UNKNOWN	UNKNOWN	0.0,0.0,0.0,0.0,0.0,0.0,0.0,0.0,0.0,0.0,0.0,0.0,0.0,0.0,0.0,0.0,0.0,0.0,1.0,0.0,0.0,0.0,0.0,0.0,0.0,0.0,0.0,0.0,0.0,0.0,0.0,0.0,0.0,0.0,0.0,0.0,0.0,0.0,0.0,0.0,0.0,0.0,0.0,0.0
MG: Uncharacterized protein YloV OS=Bacillus subtilis (strain 168) GN=yloV PE=3 SV=1 [O34751] Score: 479.0	K07030	UNKNOWN	1.0,1.0,1.0,2.0,0.0,0.0,1.0,3.0,4.0,4.0,10.0,13.0,14.0,12.0,5.0,4.0,11.0,10.0,5.0,3.0,0.0,1.0,0.0,0.0,0.0,0.0,0.0,0.0,1.0,0.0,0.0,0.0,1.0,0.0,1.0,0.0,3.0,1.0,1.0,0.0,1.0,1.0,5.0,0.0
MG: Tetrahydromethanopterin S-methyltransferase subunit A OS=Methanospirillum hungatei JF-1 (strain ATCC 27890 / DSM 864 / NBRC 100397 / JF-1) GN=mtrA PE=3 SV=1 [Q2FRN2] Score: 113.0	K00577	2.1.1.86	859.0,719.0,525.0,395.0,660.0,787.0,716.0,755.0,549.0,543.0,441.0,604.0,602.0,579.0,486.0,459.0,496.0,449.0,583.0,534.0,390.0,450.0,367.0,319.0,702.0,708.0,620.0,517.0,308.0,280.0,205.0,266.0,406.0,341.0,532.0,441.0,786.0,895.0,825.0,759.0,49.0,190.0,89.0,267.0
MG: Oligopeptide transport ATP-binding protein AppF OS=Bacillus subtilis (strain 168) GN=appF PE=3 SV=2 [P42065] Score: 406.0	K02032	UNKNOWN	12.0,11.0,15.0,7.0,46.0,50.0,95.0,106.0,127.0,87.0,86.0,138.0,144.0,166.0,141.0,96.0,173.0,149.0,57.0,82.0,20.0,18.0,23.0,19.0,78.0,80.0,142.0,108.0,35.0,20.0,18.0,33.0,89.0,83.0,120.0,133.0,61.0,92.0,32.0,36.0,0.0,7.0,1.0,4.0
UPP_KLEP7 Uracil phosphoribosyltransferase OS=Klebsiella pneumoniae subsp. pneumoniae (strain ATCC 700721 / MGH 78578) GN=upp PE=3 SV=1	K00761	2.4.2.9	0.0,0.0,0.0,0.0,0.0,0.0,0.0,0.0,0.0,0.0,0.0,0.0,0.0,0.0,0.0,0.0,0.0,0.0,0.0,0.0,0.0,0.0,0.0,0.0,0.0,0.0,0.0,0.0,0.0,0.0,0.0,0.0,0.0,0.0,0.0,0.0,0.0,0.0,0.0,0.0,0.0,0.0,4.0,0.0
RR4_ELEIN 30S ribosomal protein S4, chloroplastic (Fragment) OS=Eleusine indica GN=rps4 PE=3 SV=1	UNKNOWN	UNKNOWN	0.0,0.0,0.0,0.0,0.0,1.0,0.0,0.0,0.0,0.0,0.0,0.0,0.0,0.0,0.0,0.0,0.0,0.0,0.0,0.0,0.0,0.0,0.0,0.0,0.0,0.0,0.0,0.0,0.0,0.0,0.0,0.0,0.0,0.0,0.0,0.0,0.0,0.0,0.0,0.0,0.0,0.0,0.0,0.0
MG: Acyl-coenzyme A dehydrogenase OS=Salmonella typhimurium (strain LT2 / SGSC1412 / ATCC 700720) GN=fadE PE=2 SV=1 [Q8ZRJ7] Score: 681.0	K06445	1.3.99.-	0.0,0.0,0.0,0.0,0.0,0.0,0.0,0.0,0.0,0.0,0.0,0.0,0.0,0.0,0.0,0.0,0.0,1.0,0.0,0.0,0.0,0.0,0.0,0.0,0.0,0.0,0.0,0.0,0.0,0.0,0.0,0.0,0.0,0.0,0.0,0.0,0.0,0.0,0.0,0.0,0.0,0.0,2.0,0.0
FLGB_RHOSH Flagellar basal body rod protein FlgB OS=Rhodobacter sphaeroides GN=flgB PE=3 SV=1	K02387	UNKNOWN	0.0,0.0,0.0,0.0,0.0,0.0,0.0,0.0,0.0,0.0,0.0,0.0,0.0,0.0,0.0,0.0,0.0,0.0,0.0,0.0,0.0,0.0,0.0,0.0,0.0,0.0,0.0,0.0,0.0,0.0,0.0,0.0,0.0,0.0,0.0,0.0,0.0,0.0,0.0,0.0,1.0,0.0,0.0,0.0
CB4A_ARATH Chlorophyll a-b binding protein CP29.1, chloroplastic OS=Arabidopsis thaliana GN=LHCB4.1 PE=1 SV=1	K08915	UNKNOWN	10.0,20.0,2.0,6.0,59.0,97.0,88.0,58.0,15.0,8.0,12.0,8.0,2.0,0.0,1.0,0.0,0.0,0.0,0.0,0.0,17.0,11.0,17.0,14.0,0.0,1.0,1.0,2.0,0.0,5.0,47.0,48.0,15.0,8.0,0.0,0.0,0.0,1.0,20.0,11.0,0.0,1.0,0.0,8.0
MG: DNA-directed RNA polymerase subunit omega OS=Lactobacillus reuteri (strain DSM 20016) GN=rpoZ PE=3 SV=1 [A5VKQ8] Score: 70.5	K03060	2.7.7.6	0.0,0.0,0.0,0.0,0.0,0.0,0.0,0.0,0.0,0.0,0.0,0.0,6.0,6.0,4.0,2.0,1.0,0.0,0.0,0.0,0.0,0.0,0.0,0.0,0.0,0.0,0.0,0.0,0.0,0.0,0.0,0.0,0.0,0.0,0.0,0.0,0.0,0.0,0.0,0.0,0.0,0.0,0.0,0.0
RS4_BARQU 30S ribosomal protein S4 OS=Bartonella quintana (strain Toulouse) GN=rpsD PE=3 SV=1	K02986	UNKNOWN	0.0,0.0,0.0,0.0,0.0,0.0,0.0,0.0,0.0,0.0,0.0,0.0,0.0,0.0,0.0,0.0,0.0,0.0,0.0,0.0,0.0,0.0,0.0,0.0,0.0,0.0,0.0,0.0,0.0,0.0,0.0,0.0,0.0,0.0,0.0,0.0,0.0,0.0,0.0,0.0,0.0,0.0,5.0,0.0
MG: Electron transport complex subunit D OS=Erwinia tasmaniensis (strain DSM 17950 / Et1/99) GN=rnfD PE=3 SV=1 [B2VEQ4] Score: 227.0	K03614	UNKNOWN	0.0,0.0,0.0,0.0,0.0,0.0,0.0,0.0,0.0,0.0,0.0,0.0,12.0,7.0,7.0,4.0,6.0,6.0,5.0,6.0,0.0,1.0,0.0,0.0,0.0,0.0,0.0,0.0,0.0,0.0,0.0,0.0,0.0,0.0,0.0,0.0,0.0,0.0,0.0,0.0,0.0,0.0,0.0,0.0
IPI1_KLULA Pre-rRNA-processing protein IPI1 OS=Kluyveromyces lactis (strain ATCC 8585 / CBS 2359 / DSM 70799 / NBRC 1267 / NRRL Y-1140 / WM37) GN=IPI1 PE=3 SV=1	K14827	UNKNOWN	0.0,0.0,0.0,0.0,0.0,0.0,0.0,0.0,0.0,0.0,0.0,0.0,0.0,0.0,0.0,0.0,0.0,0.0,0.0,0.0,1.0,0.0,0.0,0.0,0.0,0.0,0.0,0.0,0.0,0.0,0.0,0.0,0.0,0.0,0.0,0.0,0.0,0.0,0.0,0.0,0.0,0.0,0.0,0.0
MG: Probable 5-formyltetrahydrofolate cyclo-ligase OS=Caenorhabditis elegans GN=Y106G6E.4 PE=3 SV=1 [Q9XWE6] Score: 102.0	K01934	6.3.3.2	0.0,0.0,0.0,0.0,0.0,0.0,0.0,0.0,0.0,0.0,0.0,0.0,2.0,2.0,1.0,0.0,1.0,3.0,0.0,0.0,0.0,0.0,0.0,0.0,0.0,0.0,0.0,0.0,0.0,0.0,0.0,0.0,0.0,0.0,0.0,0.0,0.0,0.0,0.0,0.0,0.0,0.0,0.0,0.0
MG: S-adenosyl-L-methionine-dependent uroporphyrinogen III methyltransferase OS=Methanosarcina barkeri (strain Fusaro / DSM 804) GN=Mbar_A1791 PE=1 SV=1 [Q46BL0] Score: 287.0	K02303	2.1.1.107	0.0,0.0,0.0,0.0,11.0,7.0,2.0,5.0,0.0,0.0,0.0,1.0,0.0,0.0,0.0,0.0,0.0,0.0,0.0,0.0,0.0,0.0,0.0,0.0,0.0,0.0,0.0,0.0,3.0,1.0,1.0,1.0,0.0,0.0,0.0,0.0,0.0,0.0,1.0,1.0,0.0,0.0,0.0,0.0
MG: NADH-quinone oxidoreductase subunit N OS=Desulforudis audaxviator (strain MP104C) GN=nuoN PE=3 SV=1 [B1I6I5] Score: 162.0	K05568	1.6.5.11	0.0,0.0,0.0,0.0,0.0,0.0,0.0,0.0,0.0,0.0,0.0,0.0,0.0,0.0,0.0,0.0,0.0,0.0,0.0,0.0,0.0,0.0,0.0,0.0,0.0,0.0,0.0,0.0,0.0,1.0,0.0,0.0,0.0,0.0,0.0,0.0,0.0,0.0,0.0,0.0,0.0,0.0,0.0,0.0
MG: Sucrose phosphorylase OS=Leuconostoc mesenteroides PE=1 SV=1 [Q59495] Score: 164.0	UNKNOWN	2.4.1.7	0.0,0.0,0.0,0.0,7.0,3.0,7.0,2.0,0.0,0.0,0.0,0.0,0.0,0.0,0.0,0.0,0.0,0.0,0.0,0.0,0.0,4.0,1.0,0.0,4.0,3.0,2.0,2.0,7.0,29.0,10.0,8.0,1.0,0.0,0.0,1.0,3.0,7.0,14.0,10.0,0.0,0.0,0.0,2.0
MG: 50S ribosomal protein L19 OS=Parabacteroides distasonis (strain ATCC 8503 / DSM 20701 / NCTC 11152) GN=rplS PE=3 SV=1 [A6LEF2] Score: 180.0	K02884	UNKNOWN	4.0,1.0,0.0,1.0,0.0,0.0,0.0,0.0,0.0,0.0,0.0,0.0,0.0,0.0,0.0,0.0,0.0,0.0,0.0,0.0,3.0,2.0,0.0,2.0,0.0,0.0,0.0,0.0,2.0,0.0,0.0,2.0,0.0,0.0,1.0,0.0,3.0,0.0,0.0,0.0,0.0,0.0,0.0,0.0
MG: Putative type VI secretion system protein VgrGB OS=Dickeya dadantii (strain 3937) GN=vgrGB PE=4 SV=1 [E0SIS4] Score: 169.0	K11904	UNKNOWN	0.0,0.0,0.0,0.0,0.0,0.0,0.0,0.0,0.0,0.0,0.0,0.0,3.0,0.0,0.0,0.0,0.0,0.0,0.0,0.0,0.0,0.0,0.0,0.0,0.0,0.0,0.0,0.0,0.0,0.0,0.0,0.0,0.0,0.0,0.0,0.0,0.0,0.0,0.0,0.0,0.0,0.0,0.0,0.0
ATM1_NOVAD ATM1-type heavy metal exporter OS=Novosphingobium aromaticivorans (strain DSM 12444 / F199) GN=atm1 PE=1 SV=1	K06147	UNKNOWN	0.0,0.0,0.0,0.0,0.0,0.0,0.0,0.0,0.0,0.0,0.0,0.0,0.0,0.0,0.0,0.0,0.0,2.0,0.0,0.0,0.0,0.0,0.0,0.0,0.0,0.0,0.0,0.0,0.0,0.0,0.0,0.0,0.0,0.0,0.0,0.0,0.0,0.0,0.0,0.0,0.0,0.0,0.0,0.0
RL31B_STRE4 50S ribosomal protein L31 type B OS=Streptococcus equi subsp. equi (strain 4047) GN=rpmE2 PE=3 SV=1	K02909	UNKNOWN	0.0,0.0,3.0,3.0,0.0,0.0,0.0,0.0,0.0,0.0,0.0,0.0,0.0,0.0,0.0,0.0,0.0,0.0,0.0,0.0,0.0,1.0,0.0,1.0,0.0,0.0,0.0,0.0,0.0,0.0,0.0,0.0,0.0,0.0,0.0,0.0,1.0,0.0,4.0,5.0,0.0,0.0,0.0,0.0
ASPR_HORVU Phytepsin OS=Hordeum vulgare PE=1 SV=1	K08245	3.4.23.40	1.0,0.0,0.0,0.0,3.0,5.0,1.0,1.0,0.0,0.0,0.0,0.0,0.0,0.0,0.0,0.0,0.0,0.0,0.0,0.0,0.0,0.0,0.0,0.0,0.0,0.0,0.0,0.0,0.0,0.0,0.0,0.0,0.0,0.0,0.0,0.0,0.0,0.0,0.0,0.0,0.0,0.0,0.0,1.0
MG: Transposase for insertion sequence element IS904 OS=Lactococcus lactis subsp. lactis (strain IL1403) GN=nisX1 PE=3 SV=1 [P35878] Score: 91.3	K07497	UNKNOWN	0.0,0.0,0.0,0.0,0.0,0.0,0.0,0.0,0.0,0.0,1.0,0.0,1.0,0.0,0.0,0.0,0.0,0.0,1.0,0.0,0.0,0.0,0.0,0.0,2.0,4.0,0.0,3.0,0.0,0.0,1.0,2.0,0.0,1.0,0.0,0.0,0.0,0.0,0.0,1.0,1.0,0.0,0.0,0.0
MCCA_ORYSJ Methylcrotonoyl-CoA carboxylase subunit alpha, mitochondrial OS=Oryza sativa subsp. japonica GN=MCCA PE=2 SV=2	K01968	6.4.1.4	0.0,0.0,0.0,0.0,0.0,0.0,0.0,0.0,0.0,0.0,0.0,0.0,0.0,0.0,0.0,0.0,0.0,0.0,0.0,0.0,0.0,0.0,0.0,0.0,0.0,0.0,0.0,0.0,0.0,0.0,0.0,0.0,0.0,0.0,0.0,0.0,0.0,0.0,0.0,0.0,0.0,0.0,1.0,0.0
MG: Deoxyribose-phosphate aldolase OS=Geobacillus thermodenitrificans (strain NG80-2) GN=deoC PE=3 SV=1 [A4IR26] Score: 266.0	K01619	4.1.2.4	0.0,0.0,0.0,0.0,0.0,0.0,0.0,0.0,0.0,0.0,0.0,0.0,1.0,0.0,0.0,0.0,0.0,0.0,0.0,0.0,0.0,0.0,0.0,0.0,0.0,0.0,0.0,0.0,0.0,0.0,2.0,5.0,0.0,1.0,1.0,2.0,0.0,0.0,0.0,0.0,0.0,0.0,0.0,0.0
MDM12_CANGA Mitochondrial distribution and morphology protein 12 OS=Candida glabrata (strain ATCC 2001 / CBS 138 / JCM 3761 / NBRC 0622 / NRRL Y-65) GN=MDM12 PE=3 SV=1	K17765	UNKNOWN	0.0,0.0,1.0,0.0,0.0,0.0,0.0,0.0,0.0,0.0,0.0,0.0,0.0,0.0,0.0,0.0,0.0,0.0,0.0,0.0,0.0,0.0,0.0,0.0,0.0,0.0,0.0,0.0,0.0,0.0,0.0,0.0,0.0,0.0,0.0,0.0,0.0,0.0,0.0,0.0,0.0,0.0,0.0,0.0
FABZ_LACLS 3-hydroxyacyl-[acyl-carrier-protein] dehydratase FabZ OS=Lactococcus lactis subsp. cremoris (strain SK11) GN=fabZ PE=3 SV=1	K02372	4.2.1.59	0.0,0.0,0.0,0.0,0.0,0.0,0.0,1.0,0.0,0.0,0.0,1.0,7.0,6.0,9.0,6.0,13.0,7.0,0.0,7.0,0.0,0.0,0.0,0.0,0.0,0.0,0.0,0.0,0.0,0.0,0.0,0.0,0.0,0.0,0.0,0.0,0.0,0.0,1.0,0.0,2.0,0.0,4.0,2.0
IF4A_USTMA ATP-dependent RNA helicase eIF4A OS=Ustilago maydis (strain 521 / FGSC 9021) GN=TIF1 PE=3 SV=1	K03257	3.6.4.13	0.0,0.0,0.0,0.0,3.0,4.0,0.0,2.0,2.0,1.0,2.0,1.0,0.0,0.0,0.0,0.0,0.0,0.0,0.0,0.0,0.0,0.0,0.0,0.0,0.0,0.0,0.0,0.0,0.0,0.0,2.0,2.0,0.0,0.0,0.0,1.0,0.0,1.0,3.0,2.0,1.0,1.0,1.0,2.0
IF2_DEIRA Translation initiation factor IF-2 OS=Deinococcus radiodurans (strain ATCC 13939 / DSM 20539 / JCM 16871 / LMG 4051 / NBRC 15346 / NCIMB 9279 / R1 / VKM B-1422) GN=infB PE=3 SV=1	K02519	UNKNOWN	0.0,0.0,0.0,0.0,0.0,0.0,0.0,0.0,0.0,0.0,0.0,0.0,0.0,0.0,0.0,0.0,0.0,0.0,0.0,0.0,0.0,0.0,0.0,0.0,0.0,0.0,0.0,0.0,0.0,0.0,0.0,0.0,0.0,0.0,0.0,0.0,0.0,0.0,0.0,0.0,0.0,0.0,5.0,0.0
CNGA4_RAT Cyclic nucleotide-gated cation channel alpha-4 OS=Rattus norvegicus GN=Cnga4 PE=2 SV=1	K04951	UNKNOWN	0.0,0.0,0.0,0.0,0.0,0.0,0.0,0.0,0.0,0.0,0.0,0.0,0.0,0.0,0.0,0.0,0.0,0.0,0.0,0.0,1.0,0.0,0.0,0.0,0.0,0.0,0.0,0.0,0.0,0.0,0.0,0.0,0.0,0.0,0.0,0.0,0.0,0.0,0.0,0.0,0.0,0.0,0.0,0.0
MG: ADP-ribose pyrophosphatase OS=Bacillus subtilis (strain 168) GN=nudF PE=1 SV=1 [P54570] Score: 175.0	K01515	3.6.1.13	0.0,0.0,0.0,0.0,1.0,0.0,0.0,0.0,4.0,2.0,13.0,6.0,7.0,2.0,4.0,0.0,21.0,14.0,0.0,3.0,0.0,0.0,0.0,0.0,0.0,0.0,0.0,0.0,0.0,1.0,0.0,0.0,0.0,0.0,0.0,0.0,0.0,0.0,2.0,3.0,0.0,0.0,0.0,0.0
MG: Putative lipid II flippase FtsW OS=Coxiella burnetii (strain RSA 493 / Nine Mile phase I) GN=ftsW PE=3 SV=1 [Q9XCY0] Score: 124.0	K03588	UNKNOWN	0.0,0.0,1.0,0.0,0.0,0.0,0.0,0.0,0.0,0.0,0.0,0.0,0.0,0.0,0.0,0.0,0.0,0.0,0.0,0.0,0.0,0.0,0.0,0.0,0.0,0.0,0.0,0.0,0.0,0.0,0.0,0.0,0.0,0.0,0.0,0.0,0.0,0.0,0.0,0.0,0.0,0.0,0.0,0.0
MG: DNA protection during starvation protein OS=Helicobacter pylori (strain J99 / ATCC 700824) GN=dps PE=3 SV=1 [Q9ZMJ1] Score: 95.9	K04047	1.16.-.-	6.0,3.0,6.0,4.0,13.0,5.0,13.0,18.0,13.0,17.0,9.0,9.0,168.0,137.0,136.0,183.0,169.0,122.0,48.0,118.0,1.0,5.0,0.0,0.0,13.0,4.0,5.0,4.0,1.0,0.0,2.0,2.0,4.0,3.0,13.0,6.0,1.0,7.0,10.0,10.0,0.0,0.0,2.0,3.0
DYH17_MOUSE Dynein heavy chain 17, axonemal OS=Mus musculus GN=Dnah17 PE=2 SV=2	UNKNOWN	UNKNOWN	0.0,0.0,0.0,0.0,0.0,0.0,0.0,0.0,0.0,0.0,0.0,0.0,1.0,0.0,0.0,0.0,0.0,0.0,0.0,0.0,1.0,0.0,0.0,0.0,0.0,0.0,0.0,0.0,0.0,0.0,0.0,0.0,0.0,0.0,0.0,0.0,0.0,0.0,0.0,0.0,0.0,0.0,0.0,0.0
MG: 50S ribosomal protein L18 OS=Carboxydothermus hydrogenoformans (strain ATCC BAA-161 / DSM 6008 / Z-2901) GN=rplR PE=3 SV=1 [Q3A9T2] Score: 151.0	K02881	UNKNOWN	11.0,5.0,6.0,5.0,1.0,2.0,2.0,1.0,1.0,0.0,0.0,0.0,25.0,17.0,15.0,8.0,14.0,10.0,0.0,7.0,4.0,1.0,2.0,5.0,0.0,1.0,0.0,1.0,1.0,1.0,0.0,4.0,1.0,2.0,3.0,1.0,0.0,1.0,0.0,0.0,0.0,1.0,0.0,0.0
MG: Phosphopantetheine adenylyltransferase OS=Heliobacterium modesticaldum (strain ATCC 51547 / Ice1) GN=coaD PE=3 SV=1 [B0TGU9] Score: 198.0	K00954	2.7.7.3	0.0,0.0,0.0,0.0,0.0,0.0,0.0,0.0,0.0,0.0,0.0,0.0,0.0,0.0,0.0,1.0,0.0,0.0,0.0,0.0,0.0,0.0,0.0,0.0,0.0,0.0,0.0,0.0,0.0,0.0,0.0,0.0,0.0,0.0,0.0,0.0,0.0,0.0,0.0,0.0,0.0,0.0,0.0,0.0
HSLV_ECO55 ATP-dependent protease subunit HslV OS=Escherichia coli (strain 55989 / EAEC) GN=hslV PE=3 SV=1	K01419	3.4.25.2	0.0,0.0,0.0,0.0,0.0,0.0,0.0,0.0,0.0,0.0,0.0,0.0,0.0,0.0,0.0,0.0,0.0,0.0,0.0,0.0,0.0,0.0,0.0,0.0,0.0,0.0,0.0,0.0,0.0,0.0,0.0,0.0,0.0,0.0,0.0,0.0,0.0,0.0,0.0,0.0,0.0,0.0,1.0,0.0
MG: Aspartokinase OS=Mycobacterium smegmatis GN=ask PE=3 SV=1 [P41403] Score: 337.0	K00928	2.7.2.4	0.0,0.0,0.0,0.0,0.0,0.0,0.0,0.0,0.0,0.0,0.0,0.0,0.0,0.0,2.0,0.0,0.0,0.0,0.0,0.0,0.0,0.0,0.0,0.0,0.0,0.0,1.0,0.0,0.0,0.0,0.0,0.0,0.0,0.0,2.0,0.0,0.0,0.0,0.0,0.0,0.0,0.0,0.0,0.0
GAG_HV2BE Gag polyprotein OS=Human immunodeficiency virus type 2 subtype A (isolate BEN) GN=gag PE=3 SV=3	UNKNOWN	UNKNOWN	0.0,0.0,0.0,0.0,0.0,0.0,0.0,0.0,0.0,0.0,0.0,0.0,0.0,0.0,0.0,0.0,0.0,0.0,11.0,0.0,0.0,0.0,0.0,0.0,0.0,0.0,0.0,0.0,0.0,0.0,0.0,0.0,0.0,0.0,0.0,0.0,0.0,0.0,0.0,0.0,0.0,0.0,0.0,0.0
MG: Uncharacterized transporter YcxC OS=Bacillus subtilis (strain 168) GN=ycxC PE=3 SV=2 [Q08794] Score: 125.0	UNKNOWN	UNKNOWN	0.0,0.0,0.0,0.0,0.0,0.0,0.0,0.0,0.0,0.0,0.0,1.0,0.0,0.0,0.0,0.0,0.0,0.0,0.0,0.0,0.0,0.0,0.0,0.0,0.0,0.0,0.0,0.0,0.0,0.0,0.0,0.0,0.0,0.0,0.0,0.0,0.0,0.0,0.0,0.0,0.0,0.0,0.0,0.0
PENA_BURM1 Beta-lactamase OS=Burkholderia multivorans (strain ATCC 17616 / 249) GN=penA PE=2 SV=1	UNKNOWN	3.5.2.6	0.0,0.0,0.0,0.0,0.0,0.0,0.0,0.0,0.0,0.0,0.0,0.0,0.0,0.0,0.0,0.0,0.0,0.0,0.0,0.0,0.0,0.0,0.0,0.0,0.0,0.0,0.0,0.0,0.0,0.0,0.0,0.0,0.0,0.0,0.0,0.0,0.0,0.0,0.0,0.0,0.0,0.0,2.0,0.0
MG: Phosphoribosylformylglycinamidine synthase subunit PurL OS=Methanocaldococcus jannaschii (strain ATCC 43067 / DSM 2661 / JAL-1 / JCM 10045 / NBRC 100440) GN=purL PE=3 SV=1 [Q58660] Score: 162.0	K01952	6.3.5.3	0.0,0.0,0.0,0.0,0.0,0.0,0.0,0.0,0.0,0.0,0.0,0.0,0.0,0.0,0.0,0.0,0.0,0.0,0.0,0.0,0.0,0.0,0.0,0.0,0.0,0.0,0.0,0.0,1.0,0.0,0.0,0.0,0.0,0.0,0.0,0.0,0.0,0.0,0.0,0.0,0.0,0.0,0.0,0.0
MG: Uncharacterized sodium-dependent transporter YocS OS=Bacillus subtilis (strain 168) GN=yocS PE=3 SV=1 [O34524] Score: 118.0	K03453	UNKNOWN	0.0,0.0,0.0,0.0,0.0,0.0,0.0,0.0,0.0,0.0,0.0,0.0,0.0,0.0,0.0,0.0,0.0,0.0,0.0,0.0,1.0,0.0,0.0,0.0,0.0,0.0,0.0,0.0,0.0,0.0,0.0,0.0,0.0,0.0,0.0,0.0,0.0,0.0,0.0,0.0,0.0,0.0,0.0,0.0
MG: Central glycolytic genes regulator OS=Bacillus subtilis (strain 168) GN=cggR PE=1 SV=1 [O32253] Score: 184.0	K05311	UNKNOWN	0.0,0.0,0.0,0.0,0.0,0.0,2.0,0.0,0.0,0.0,0.0,0.0,0.0,0.0,0.0,0.0,0.0,0.0,0.0,0.0,1.0,1.0,1.0,2.0,0.0,0.0,0.0,0.0,0.0,1.0,0.0,1.0,0.0,0.0,0.0,0.0,1.0,0.0,0.0,0.0,0.0,0.0,0.0,0.0
MG: Thiosulfate reductase electron transport protein PhsB OS=Salmonella typhimurium (strain LT2 / SGSC1412 / ATCC 700720) GN=phsB PE=3 SV=1 [P0A1I1] Score: 46.6	K08353	UNKNOWN	0.0,0.0,0.0,0.0,0.0,0.0,0.0,0.0,0.0,0.0,0.0,0.0,0.0,0.0,0.0,0.0,0.0,0.0,0.0,0.0,4.0,0.0,0.0,4.0,0.0,0.0,0.0,0.0,0.0,0.0,0.0,0.0,0.0,0.0,0.0,0.0,0.0,0.0,2.0,0.0,0.0,0.0,0.0,0.0
MG: Malonyl-S-ACP:biotin-protein carboxyltransferase MADC OS=Malonomonas rubra GN=madC PE=1 SV=1 [O06926] Score: 164.0	UNKNOWN	2.1.3.10	0.0,0.0,0.0,0.0,0.0,0.0,0.0,0.0,0.0,0.0,0.0,0.0,0.0,0.0,0.0,0.0,0.0,0.0,0.0,0.0,0.0,0.0,0.0,0.0,0.0,0.0,0.0,0.0,0.0,0.0,0.0,0.0,0.0,0.0,0.0,0.0,0.0,0.0,0.0,0.0,0.0,0.0,0.0,1.0
GLT1_SCHPO Putative glutamate synthase [NADPH] OS=Schizosaccharomyces pombe (strain 972 / ATCC 24843) GN=glt1 PE=2 SV=1	K00264	1.4.1.13	0.0,0.0,0.0,0.0,0.0,0.0,0.0,0.0,0.0,0.0,0.0,0.0,0.0,0.0,0.0,0.0,0.0,0.0,0.0,0.0,0.0,0.0,0.0,0.0,0.0,0.0,0.0,0.0,1.0,0.0,0.0,0.0,0.0,0.0,0.0,0.0,0.0,0.0,0.0,0.0,0.0,0.0,0.0,0.0
MG: N-acetylglucosamine-6-phosphate deacetylase OS=Bacillus subtilis (strain 168) GN=nagA PE=1 SV=1 [O34450] Score: 261.0	K01443	3.5.1.25	0.0,0.0,0.0,0.0,0.0,0.0,0.0,0.0,0.0,0.0,1.0,0.0,8.0,9.0,7.0,5.0,9.0,11.0,10.0,9.0,0.0,0.0,0.0,0.0,0.0,0.0,0.0,0.0,0.0,0.0,0.0,0.0,0.0,0.0,0.0,1.0,0.0,0.0,0.0,0.0,0.0,0.0,0.0,0.0
MG: Stage III sporulation protein AD OS=Bacillus subtilis (strain 168) GN=spoIIIAD PE=4 SV=1 [P49781] Score: 76.6	K06393	UNKNOWN	0.0,0.0,0.0,0.0,0.0,0.0,0.0,0.0,0.0,0.0,0.0,0.0,0.0,0.0,0.0,0.0,0.0,0.0,0.0,0.0,0.0,1.0,1.0,0.0,0.0,0.0,0.0,0.0,0.0,0.0,0.0,0.0,0.0,0.0,0.0,0.0,0.0,0.0,0.0,1.0,0.0,0.0,0.0,0.0
MG: RNA polymerase sigma-H factor OS=Bacillus subtilis (strain 168) GN=sigH PE=1 SV=1 [P17869] Score: 46.6	K03091	UNKNOWN	0.0,0.0,0.0,0.0,0.0,0.0,0.0,1.0,0.0,0.0,0.0,0.0,1.0,0.0,1.0,0.0,0.0,0.0,0.0,0.0,0.0,1.0,0.0,0.0,0.0,0.0,0.0,0.0,0.0,0.0,0.0,0.0,0.0,0.0,0.0,0.0,0.0,0.0,0.0,0.0,0.0,0.0,0.0,0.0
MG: Beta-lactam-inducible penicillin-binding protein OS=Staphylococcus aureus GN=pbp PE=2 SV=1 [P07944] Score: 102.0	UNKNOWN	UNKNOWN	0.0,0.0,0.0,0.0,0.0,0.0,0.0,0.0,0.0,0.0,2.0,0.0,0.0,0.0,0.0,0.0,0.0,0.0,0.0,0.0,0.0,0.0,0.0,0.0,0.0,0.0,0.0,0.0,0.0,0.0,0.0,1.0,1.0,0.0,0.0,0.0,0.0,0.0,0.0,0.0,0.0,0.0,0.0,0.0
MG: Acetyl esterase OS=Caldicellulosiruptor saccharolyticus GN=xynC PE=4 SV=1 [P23553] Score: 254.0	UNKNOWN	3.1.-.-	0.0,0.0,0.0,0.0,0.0,0.0,0.0,0.0,0.0,0.0,0.0,0.0,0.0,0.0,0.0,0.0,0.0,0.0,0.0,0.0,0.0,0.0,0.0,0.0,0.0,0.0,0.0,0.0,0.0,0.0,0.0,0.0,0.0,0.0,0.0,0.0,2.0,0.0,0.0,1.0,0.0,0.0,0.0,0.0
HACL1_ORYSJ Probable histone acetyltransferase HAC-like 1 OS=Oryza sativa subsp. japonica GN=Os02g0137500 PE=3 SV=2	K04498	2.3.1.48	0.0,0.0,0.0,0.0,2.0,1.0,0.0,0.0,0.0,0.0,0.0,0.0,0.0,0.0,0.0,0.0,0.0,0.0,0.0,0.0,0.0,0.0,0.0,0.0,0.0,0.0,0.0,0.0,0.0,0.0,0.0,0.0,0.0,0.0,0.0,0.0,0.0,0.0,0.0,0.0,0.0,0.0,0.0,0.0
Y763_SALRD Maf-like protein SRU_0763 OS=Salinibacter ruber (strain DSM 13855 / M31) GN=SRU_0763 PE=3 SV=2	K06287	UNKNOWN	0.0,0.0,0.0,0.0,0.0,0.0,0.0,0.0,0.0,0.0,0.0,0.0,0.0,0.0,0.0,0.0,0.0,0.0,0.0,0.0,1.0,0.0,0.0,0.0,0.0,0.0,0.0,0.0,0.0,0.0,0.0,0.0,0.0,0.0,0.0,0.0,0.0,0.0,0.0,0.0,0.0,0.0,0.0,0.0
MG: ABC transporter ATP-binding protein YtrB OS=Bacillus subtilis (strain 168) GN=ytrB PE=2 SV=1 [O34641] Score: 175.0	K16921	UNKNOWN	0.0,0.0,0.0,0.0,0.0,0.0,0.0,0.0,0.0,0.0,1.0,0.0,1.0,0.0,2.0,0.0,1.0,2.0,0.0,0.0,0.0,0.0,0.0,0.0,0.0,0.0,0.0,0.0,0.0,0.0,0.0,0.0,0.0,0.0,0.0,0.0,0.0,0.0,0.0,0.0,0.0,0.0,0.0,0.0
SCRK_ECOLX Fructokinase OS=Escherichia coli GN=cscK PE=3 SV=2	UNKNOWN	2.7.1.4	0.0,0.0,0.0,0.0,0.0,0.0,0.0,0.0,0.0,0.0,0.0,0.0,0.0,0.0,0.0,0.0,0.0,0.0,1.0,0.0,0.0,0.0,0.0,0.0,0.0,0.0,0.0,0.0,0.0,0.0,0.0,0.0,0.0,0.0,0.0,0.0,0.0,0.0,0.0,0.0,0.0,0.0,0.0,0.0
MG: Alkaline protease secretion protein AprF OS=Pseudomonas aeruginosa (strain ATCC 15692 / PAO1 / 1C / PRS 101 / LMG 12228) GN=aprF PE=3 SV=1 [Q03027] Score: 58.5	K12538	UNKNOWN	0.0,0.0,0.0,0.0,0.0,0.0,0.0,0.0,0.0,1.0,0.0,0.0,1.0,0.0,0.0,0.0,1.0,1.0,0.0,0.0,0.0,0.0,0.0,0.0,0.0,0.0,0.0,0.0,0.0,0.0,0.0,0.0,0.0,0.0,0.0,0.0,0.0,0.0,0.0,0.0,0.0,0.0,0.0,0.0
MG: Soluble inorganic pyrophosphatase 2 OS=Chlamydomonas reinhardtii GN=ppa2 PE=1 SV=1 [Q949J1] Score: 168.0	K01507	3.6.1.1	0.0,0.0,0.0,0.0,0.0,0.0,0.0,0.0,0.0,0.0,0.0,0.0,0.0,0.0,0.0,0.0,0.0,0.0,0.0,0.0,0.0,0.0,0.0,0.0,0.0,0.0,0.0,0.0,0.0,0.0,0.0,0.0,0.0,0.0,0.0,0.0,1.0,0.0,0.0,0.0,0.0,0.0,0.0,0.0
CORA1_HUMAN Collagen alpha-1(XXVII) chain OS=Homo sapiens GN=COL27A1 PE=1 SV=1	K19721	UNKNOWN	0.0,0.0,0.0,0.0,0.0,0.0,0.0,0.0,0.0,0.0,0.0,0.0,0.0,0.0,0.0,0.0,0.0,1.0,0.0,0.0,0.0,0.0,0.0,0.0,0.0,0.0,0.0,0.0,0.0,0.0,0.0,0.0,0.0,0.0,0.0,0.0,0.0,0.0,0.0,0.0,0.0,0.0,0.0,0.0
MG: Uncharacterized protein YwfO OS=Bacillus subtilis (strain 168) GN=ywfO PE=4 SV=2 [P39651] Score: 198.0	K06885	UNKNOWN	0.0,0.0,0.0,0.0,0.0,0.0,0.0,0.0,0.0,0.0,0.0,0.0,0.0,0.0,0.0,0.0,0.0,0.0,0.0,1.0,0.0,0.0,0.0,0.0,0.0,0.0,0.0,0.0,0.0,0.0,0.0,1.0,0.0,0.0,0.0,0.0,0.0,1.0,0.0,0.0,0.0,0.0,0.0,0.0
MG: Endoglucanase 1 OS=Clostridium thermocellum (strain ATCC 27405 / DSM 1237 / NBRC 103400 / NCIMB 10682 / NRRL B-4536 / VPI 7372) GN=celI PE=1 SV=2 [Q02934] Score: 155.0	K01179	3.2.1.4	73.0,65.0,137.0,65.0,0.0,38.0,26.0,122.0,12.0,44.0,114.0,90.0,1.0,14.0,0.0,0.0,0.0,0.0,0.0,0.0,8.0,80.0,1.0,2.0,0.0,0.0,0.0,3.0,4.0,87.0,7.0,40.0,3.0,0.0,2.0,79.0,339.0,63.0,2.0,12.0,0.0,0.0,0.0,0.0
ACC1_ARATH Acetyl-CoA carboxylase 1 OS=Arabidopsis thaliana GN=ACC1 PE=1 SV=1	K11262	6.4.1.2,6.3.4.14	0.0,0.0,0.0,1.0,0.0,0.0,0.0,0.0,0.0,0.0,0.0,0.0,0.0,0.0,0.0,0.0,0.0,0.0,0.0,0.0,0.0,0.0,0.0,0.0,0.0,0.0,0.0,0.0,0.0,0.0,0.0,0.0,0.0,0.0,0.0,0.0,0.0,0.0,0.0,0.0,0.0,0.0,0.0,0.0
MG: Putative iron-sulfur cluster insertion protein ErpA OS=Ralstonia pickettii (strain 12J) GN=erpA PE=3 SV=1 [B2UFK5] Score: 99.8	K15724	UNKNOWN	0.0,0.0,0.0,0.0,5.0,5.0,15.0,9.0,5.0,7.0,1.0,3.0,0.0,0.0,0.0,0.0,0.0,0.0,0.0,0.0,0.0,0.0,0.0,0.0,0.0,0.0,0.0,0.0,0.0,0.0,0.0,0.0,1.0,0.0,5.0,1.0,0.0,0.0,0.0,0.0,0.0,0.0,0.0,0.0
MG: Energy-coupling factor transporter ATP-binding protein EcfA1 OS=Caldanaerobacter subterraneus subsp. tengcongensis (strain DSM 15242 / JCM 11007 / NBRC 100824 / MB4) GN=ecfA1 PE=3 SV=2 [Q8R7Y4] Score: 275.0	K16786	3.6.3.-	0.0,0.0,0.0,0.0,5.0,4.0,0.0,2.0,0.0,0.0,0.0,0.0,13.0,12.0,24.0,2.0,5.0,7.0,7.0,11.0,0.0,0.0,0.0,0.0,3.0,1.0,1.0,0.0,0.0,0.0,0.0,0.0,0.0,1.0,0.0,0.0,0.0,0.0,0.0,2.0,0.0,0.0,0.0,0.0
MG: Desulfoferrodoxin OS=Desulfovibrio alaskensis (strain G20) GN=dfx PE=3 SV=1 [Q30WF9] Score: 116.0	K05919	1.15.1.2	0.0,0.0,0.0,0.0,0.0,0.0,0.0,0.0,0.0,1.0,3.0,5.0,10.0,2.0,9.0,10.0,10.0,3.0,7.0,6.0,0.0,0.0,0.0,0.0,0.0,0.0,0.0,0.0,0.0,0.0,0.0,0.0,0.0,0.0,0.0,0.0,0.0,0.0,3.0,1.0,0.0,0.0,0.0,0.0
MG: ABC transporter protein AbcA OS=Aeromonas salmonicida GN=abcA PE=3 SV=1 [Q07698] Score: 190.0	UNKNOWN	UNKNOWN	0.0,0.0,0.0,0.0,0.0,1.0,0.0,0.0,0.0,0.0,0.0,0.0,0.0,0.0,0.0,0.0,0.0,0.0,0.0,0.0,0.0,0.0,0.0,0.0,0.0,0.0,0.0,0.0,0.0,0.0,1.0,0.0,0.0,0.0,0.0,0.0,0.0,0.0,1.0,0.0,0.0,0.0,0.0,0.0
MG: UDP-N-acetyl-D-mannosaminuronic acid transferase OS=Photorhabdus luminescens subsp. laumondii (strain TT01) GN=wecG PE=3 SV=1 [Q7MYM6] Score: 130.0	K02852	2.4.1.180	0.0,0.0,0.0,0.0,0.0,0.0,0.0,0.0,0.0,0.0,0.0,0.0,0.0,1.0,1.0,1.0,0.0,0.0,1.0,0.0,0.0,0.0,0.0,0.0,0.0,0.0,0.0,0.0,0.0,0.0,0.0,0.0,0.0,0.0,0.0,0.0,0.0,0.0,0.0,0.0,0.0,0.0,0.0,0.0
MG: Uncharacterized protein MJ1313 OS=Methanocaldococcus jannaschii (strain ATCC 43067 / DSM 2661 / JAL-1 / JCM 10045 / NBRC 100440) GN=MJ1313 PE=4 SV=1 [Q58709] Score: 163.0	K09123	UNKNOWN	0.0,0.0,0.0,0.0,0.0,0.0,0.0,0.0,0.0,0.0,0.0,0.0,0.0,0.0,0.0,0.0,0.0,0.0,0.0,0.0,0.0,0.0,0.0,0.0,0.0,0.0,0.0,0.0,0.0,0.0,0.0,0.0,0.0,0.0,0.0,0.0,0.0,0.0,0.0,0.0,0.0,1.0,2.0,2.0
RS16_CANGA 40S ribosomal protein S16 OS=Candida glabrata (strain ATCC 2001 / CBS 138 / JCM 3761 / NBRC 0622 / NRRL Y-65) GN=RPS16 PE=3 SV=1	K02960	UNKNOWN	0.0,0.0,0.0,0.0,0.0,0.0,0.0,0.0,0.0,0.0,0.0,0.0,0.0,0.0,1.0,0.0,0.0,0.0,0.0,0.0,0.0,0.0,0.0,0.0,0.0,0.0,0.0,0.0,0.0,0.0,0.0,0.0,0.0,0.0,0.0,0.0,0.0,0.0,0.0,0.0,0.0,0.0,0.0,0.0
MG: Alkaline phosphatase isozyme conversion protein OS=Escherichia coli (strain K12) GN=iap PE=3 SV=1 [P10423] Score: 61.6	K09612	3.4.11.-	0.0,0.0,0.0,0.0,0.0,0.0,0.0,0.0,0.0,0.0,0.0,0.0,0.0,0.0,0.0,0.0,0.0,0.0,0.0,0.0,0.0,0.0,0.0,1.0,0.0,0.0,0.0,0.0,0.0,0.0,0.0,0.0,0.0,0.0,0.0,0.0,0.0,0.0,0.0,0.0,0.0,0.0,0.0,0.0
MG: Thymidylate synthase 1 OS=Bacillus subtilis subsp. spizizenii (strain ATCC 23059 / NRRL B-14472 / W23) GN=thyA1 PE=3 SV=1 [E0TVT6] Score: 243.0	K00560	2.1.1.45	0.0,0.0,0.0,0.0,0.0,0.0,0.0,0.0,0.0,0.0,0.0,0.0,0.0,0.0,0.0,0.0,0.0,0.0,0.0,0.0,0.0,0.0,0.0,0.0,0.0,0.0,0.0,0.0,0.0,0.0,0.0,0.0,1.0,0.0,0.0,0.0,0.0,0.0,2.0,0.0,0.0,0.0,0.0,0.0
MG: Internalin-I OS=Listeria monocytogenes serovar 1/2a (strain ATCC BAA-679 / EGD-e) GN=inlI PE=3 SV=1 [Q8YA32] Score: 50.8	UNKNOWN	UNKNOWN	0.0,0.0,0.0,0.0,0.0,0.0,0.0,0.0,0.0,0.0,0.0,0.0,0.0,2.0,0.0,0.0,0.0,0.0,0.0,0.0,0.0,0.0,0.0,0.0,0.0,0.0,0.0,0.0,0.0,0.0,0.0,0.0,0.0,0.0,0.0,0.0,0.0,0.0,0.0,0.0,0.0,0.0,0.0,0.0
UL31_HHV8P Virion egress protein UL31 homolog OS=Human herpesvirus 8 type P (isolate GK18) GN=ORF69 PE=1 SV=1	UNKNOWN	UNKNOWN	0.0,0.0,0.0,0.0,0.0,0.0,0.0,0.0,0.0,0.0,0.0,0.0,0.0,0.0,0.0,0.0,0.0,0.0,0.0,0.0,0.0,0.0,0.0,0.0,0.0,0.0,0.0,0.0,0.0,0.0,0.0,0.0,0.0,0.0,0.0,1.0,0.0,0.0,0.0,0.0,0.0,0.0,0.0,0.0
TOF1_MAGO7 Topoisomerase 1-associated factor 1 OS=Magnaporthe oryzae (strain 70-15 / ATCC MYA-4617 / FGSC 8958) GN=TOF1 PE=3 SV=1	K10997	UNKNOWN	0.0,0.0,0.0,0.0,0.0,0.0,0.0,0.0,0.0,0.0,0.0,0.0,0.0,0.0,0.0,0.0,0.0,0.0,0.0,0.0,0.0,0.0,0.0,0.0,0.0,0.0,2.0,0.0,0.0,0.0,0.0,0.0,0.0,0.0,0.0,0.0,0.0,0.0,0.0,0.0,0.0,0.0,0.0,0.0
CAS5_HALVD CRISPR-associated protein Cas5 OS=Haloferax volcanii (strain ATCC 29605 / DSM 3757 / JCM 8879 / NBRC 14742 / NCIMB 2012 / VKM B-1768 / DS2) GN=cas5 PE=1 SV=1	K19116	UNKNOWN	1.0,0.0,0.0,0.0,0.0,0.0,0.0,0.0,0.0,0.0,0.0,0.0,4.0,4.0,5.0,0.0,6.0,4.0,3.0,4.0,0.0,0.0,0.0,0.0,0.0,0.0,0.0,0.0,0.0,0.0,3.0,3.0,0.0,0.0,0.0,0.0,2.0,1.0,0.0,0.0,0.0,0.0,0.0,0.0
RL13_CARHZ 50S ribosomal protein L13 OS=Carboxydothermus hydrogenoformans (strain Z-2901 / DSM 6008) GN=rplM PE=3 SV=1	K02871	UNKNOWN	0.0,0.0,0.0,0.0,1.0,0.0,0.0,0.0,2.0,4.0,0.0,0.0,0.0,0.0,0.0,0.0,0.0,0.0,0.0,0.0,0.0,0.0,0.0,0.0,0.0,0.0,0.0,0.0,0.0,0.0,0.0,0.0,0.0,0.0,1.0,0.0,0.0,0.0,0.0,0.0,0.0,0.0,0.0,0.0
MG: Putative helicase 022R OS=Frog virus 3 (isolate Goorha) GN=FV3-022R PE=3 SV=1 [Q6GZV3] Score: 59.3	K06919	3.6.4.-	0.0,0.0,1.0,0.0,2.0,2.0,1.0,0.0,2.0,2.0,5.0,2.0,0.0,0.0,0.0,0.0,0.0,0.0,0.0,0.0,0.0,0.0,0.0,0.0,2.0,1.0,1.0,0.0,0.0,0.0,0.0,0.0,1.0,3.0,3.0,2.0,0.0,0.0,0.0,0.0,0.0,0.0,0.0,2.0
MG: Uncharacterized protein YeaE OS=Escherichia coli (strain K12) GN=yeaE PE=4 SV=1 [P76234] Score: 307.0	UNKNOWN	UNKNOWN	0.0,0.0,0.0,0.0,1.0,0.0,0.0,0.0,0.0,0.0,0.0,0.0,0.0,0.0,0.0,0.0,0.0,0.0,0.0,0.0,0.0,0.0,0.0,0.0,0.0,0.0,0.0,0.0,0.0,0.0,0.0,0.0,0.0,0.0,0.0,0.0,0.0,0.0,0.0,0.0,0.0,0.0,0.0,0.0
MG: Uncharacterized glycosyltransferase YqgM OS=Bacillus subtilis (strain 168) GN=yqgM PE=3 SV=2 [P54490] Score: 93.6	UNKNOWN	2.4.-.-	0.0,0.0,0.0,0.0,0.0,0.0,0.0,0.0,0.0,0.0,0.0,0.0,0.0,0.0,0.0,0.0,0.0,0.0,0.0,0.0,0.0,0.0,0.0,0.0,0.0,0.0,0.0,0.0,0.0,0.0,0.0,0.0,0.0,0.0,2.0,0.0,0.0,0.0,0.0,0.0,0.0,0.0,0.0,1.0
OPGG_ECOSE Glucans biosynthesis protein G OS=Escherichia coli (strain SE11) GN=mdoG PE=3 SV=1	K03670	UNKNOWN	0.0,0.0,0.0,0.0,0.0,0.0,0.0,0.0,0.0,0.0,0.0,0.0,0.0,0.0,0.0,0.0,0.0,0.0,0.0,0.0,0.0,0.0,0.0,0.0,0.0,0.0,0.0,0.0,0.0,0.0,0.0,0.0,0.0,0.0,0.0,0.0,0.0,0.0,0.0,0.0,0.0,0.0,3.0,0.0
YCIB_MANSM Probable intracellular septation protein A OS=Mannheimia succiniciproducens (strain MBEL55E) GN=MS0737 PE=3 SV=1	K06190	UNKNOWN	0.0,0.0,0.0,0.0,0.0,0.0,0.0,0.0,0.0,0.0,0.0,0.0,0.0,0.0,0.0,0.0,0.0,0.0,0.0,0.0,0.0,0.0,0.0,0.0,0.0,0.0,0.0,0.0,0.0,0.0,0.0,0.0,0.0,0.0,0.0,0.0,0.0,0.0,0.0,0.0,1.0,0.0,0.0,0.0
ACT2_PHYIN Actin-2 OS=Phytophthora infestans GN=ACTB PE=2 SV=1	UNKNOWN	UNKNOWN	2.0,0.0,7.0,7.0,0.0,22.0,0.0,0.0,0.0,3.0,101.0,1.0,0.0,0.0,0.0,0.0,0.0,0.0,0.0,0.0,0.0,0.0,63.0,15.0,0.0,0.0,0.0,1.0,0.0,0.0,7.0,4.0,0.0,0.0,0.0,0.0,2.0,0.0,0.0,1.0,0.0,0.0,0.0,0.0
HPPA_STRAW K(+)-insensitive pyrophosphate-energized proton pump OS=Streptomyces avermitilis (strain ATCC 31267 / DSM 46492 / JCM 5070 / NCIMB 12804 / NRRL 8165 / MA-4680) GN=hppA PE=3 SV=1	K15987	3.6.1.1	6.0,5.0,3.0,5.0,2.0,3.0,2.0,2.0,0.0,0.0,0.0,0.0,0.0,0.0,0.0,0.0,0.0,0.0,0.0,0.0,1.0,2.0,1.0,0.0,2.0,1.0,2.0,1.0,0.0,0.0,1.0,1.0,0.0,0.0,0.0,1.0,0.0,0.0,1.0,1.0,0.0,6.0,0.0,4.0
MG: Holo-[acyl-carrier-protein] synthase OS=Clostridium novyi (strain NT) GN=acpS PE=3 SV=1 [A0PY92] Score: 125.0	K00997	2.7.8.7	0.0,0.0,0.0,0.0,0.0,0.0,0.0,0.0,0.0,0.0,0.0,0.0,0.0,0.0,1.0,0.0,0.0,0.0,0.0,0.0,0.0,0.0,0.0,0.0,0.0,0.0,0.0,0.0,0.0,0.0,0.0,0.0,0.0,0.0,0.0,0.0,0.0,0.0,0.0,0.0,0.0,0.0,0.0,0.0
HTS1_COCCA HC-toxin synthetase OS=Cochliobolus carbonum GN=HTS1 PE=1 SV=2	UNKNOWN	6.3.2.-	0.0,0.0,0.0,0.0,0.0,0.0,0.0,0.0,0.0,0.0,0.0,0.0,0.0,0.0,0.0,0.0,0.0,0.0,0.0,0.0,0.0,0.0,0.0,0.0,0.0,0.0,0.0,0.0,0.0,0.0,0.0,0.0,0.0,0.0,0.0,0.0,0.0,0.0,1.0,0.0,0.0,0.0,0.0,0.0
IGHA2_HUMAN Ig alpha-2 chain C region OS=Homo sapiens GN=IGHA2 PE=1 SV=3	UNKNOWN	UNKNOWN	0.0,0.0,0.0,0.0,0.0,0.0,0.0,0.0,0.0,0.0,7.0,0.0,0.0,0.0,0.0,0.0,0.0,0.0,0.0,0.0,0.0,0.0,0.0,0.0,0.0,0.0,0.0,0.0,0.0,0.0,0.0,0.0,0.0,0.0,0.0,0.0,0.0,0.0,0.0,0.0,26.0,3.0,16.0,0.0
MG: Putative ABC transporter ATP-binding protein exp8 OS=Streptococcus pneumoniae serotype 4 (strain ATCC BAA-334 / TIGR4) GN=exp8 PE=3 SV=3 [P35598] Score: 414.0	K06147	UNKNOWN	0.0,0.0,0.0,0.0,0.0,0.0,0.0,0.0,0.0,0.0,0.0,0.0,0.0,1.0,0.0,0.0,0.0,0.0,0.0,0.0,0.0,0.0,0.0,0.0,0.0,0.0,0.0,0.0,0.0,0.0,0.0,0.0,0.0,0.0,0.0,0.0,0.0,0.0,0.0,0.0,0.0,0.0,0.0,0.0
MG: Pyruvate dehydrogenase E1 component subunit beta OS=Staphylococcus aureus (strain MW2) GN=pdhB PE=3 SV=1 [P0A0A2] Score: 512.0	UNKNOWN	1.2.4.1	0.0,0.0,0.0,0.0,0.0,0.0,0.0,0.0,0.0,0.0,0.0,0.0,0.0,0.0,0.0,0.0,0.0,0.0,1.0,0.0,0.0,0.0,0.0,0.0,0.0,0.0,0.0,0.0,0.0,0.0,4.0,3.0,0.0,0.0,0.0,0.0,1.0,0.0,2.0,0.0,0.0,1.0,3.0,2.0
MG: Beta-1,4-mannooligosaccharide phosphorylase OS=Ruminococcus albus (strain ATCC 27210 / DSM 20455 / JCM 14654 / NCDO 2250 / 7) GN=Rumal_0099 PE=1 SV=1 [E6UBR9] Score: 432.0	K18785	2.4.1.319	0.0,0.0,3.0,0.0,1.0,1.0,3.0,4.0,7.0,6.0,3.0,3.0,31.0,27.0,31.0,22.0,40.0,39.0,37.0,11.0,4.0,3.0,1.0,1.0,2.0,0.0,1.0,1.0,6.0,5.0,3.0,2.0,3.0,3.0,7.0,11.0,7.0,4.0,4.0,1.0,0.0,5.0,0.0,2.0
CLPP_STRU0 ATP-dependent Clp protease proteolytic subunit OS=Streptococcus uberis (strain ATCC BAA-854 / 0140J) GN=clpP PE=3 SV=1	K01358	3.4.21.92	9.0,1.0,19.0,11.0,1.0,7.0,1.0,0.0,0.0,0.0,1.0,2.0,3.0,0.0,0.0,0.0,0.0,5.0,0.0,0.0,1.0,0.0,1.0,0.0,10.0,4.0,6.0,5.0,4.0,0.0,0.0,0.0,5.0,4.0,2.0,0.0,4.0,0.0,4.0,7.0,0.0,0.0,0.0,0.0
MG: Iron import ATP-binding/permease protein IrtA OS=Mycobacterium tuberculosis (strain ATCC 25618 / H37Rv) GN=irtA PE=1 SV=1 [P9WQJ9] Score: 224.0	K14698	3.6.3.-	0.0,0.0,0.0,0.0,0.0,0.0,0.0,0.0,0.0,0.0,0.0,0.0,1.0,1.0,0.0,0.0,0.0,0.0,0.0,0.0,0.0,0.0,0.0,0.0,0.0,0.0,0.0,0.0,0.0,0.0,0.0,0.0,0.0,0.0,0.0,0.0,0.0,0.0,0.0,0.0,0.0,0.0,0.0,1.0
GUNF_CLOTH Endoglucanase F OS=Clostridium thermocellum (strain ATCC 27405 / DSM 1237 / NBRC 103400 / NCIMB 10682 / NRRL B-4536 / VPI 7372) GN=celF PE=3 SV=1	UNKNOWN	3.2.1.4	0.0,0.0,0.0,0.0,0.0,0.0,0.0,2.0,0.0,0.0,0.0,0.0,3.0,0.0,2.0,0.0,0.0,0.0,0.0,0.0,0.0,0.0,0.0,0.0,0.0,0.0,0.0,0.0,0.0,1.0,0.0,0.0,0.0,0.0,0.0,0.0,3.0,0.0,0.0,0.0,0.0,0.0,0.0,0.0
MG: Uncharacterized protein AF_0243 OS=Archaeoglobus fulgidus (strain ATCC 49558 / VC-16 / DSM 4304 / JCM 9628 / NBRC 100126) GN=AF_0243 PE=4 SV=1 [O29996] Score: 273.0	UNKNOWN	UNKNOWN	0.0,0.0,0.0,0.0,0.0,0.0,0.0,0.0,0.0,0.0,0.0,0.0,0.0,0.0,0.0,0.0,0.0,1.0,0.0,0.0,0.0,0.0,0.0,0.0,0.0,0.0,0.0,0.0,0.0,0.0,0.0,0.0,0.0,0.0,0.0,0.0,1.0,0.0,0.0,0.0,0.0,0.0,0.0,0.0
LOLD_NITHX Lipoprotein-releasing system ATP-binding protein LolD OS=Nitrobacter hamburgensis (strain X14 / DSM 10229) GN=lolD PE=3 SV=1	K09810	3.6.3.-	0.0,0.0,0.0,0.0,0.0,0.0,0.0,0.0,0.0,0.0,0.0,0.0,0.0,0.0,0.0,0.0,0.0,0.0,0.0,0.0,0.0,0.0,0.0,0.0,0.0,0.0,0.0,0.0,0.0,0.0,0.0,1.0,0.0,0.0,0.0,0.0,0.0,0.0,0.0,0.0,0.0,0.0,0.0,0.0
MG: Probable periplasmic serine endoprotease DegP-like OS=Rickettsia prowazekii (strain Madrid E) GN=htrA PE=3 SV=2 [O05942] Score: 86.3	K04771	3.4.21.107	0.0,0.0,0.0,0.0,0.0,0.0,0.0,0.0,0.0,0.0,0.0,0.0,1.0,0.0,0.0,0.0,0.0,0.0,0.0,0.0,0.0,0.0,0.0,0.0,0.0,0.0,0.0,0.0,0.0,0.0,0.0,0.0,0.0,0.0,0.0,0.0,0.0,0.0,0.0,0.0,0.0,0.0,0.0,0.0
RPOB_DESVM DNA-directed RNA polymerase subunit beta OS=Desulfovibrio vulgaris (strain Miyazaki F / DSM 19637) GN=rpoB PE=3 SV=1	K03043	2.7.7.6	0.0,0.0,0.0,0.0,1.0,0.0,4.0,0.0,0.0,0.0,0.0,0.0,0.0,0.0,0.0,0.0,0.0,3.0,0.0,0.0,0.0,0.0,0.0,2.0,0.0,0.0,0.0,0.0,0.0,0.0,0.0,0.0,0.0,0.0,0.0,0.0,3.0,8.0,1.0,0.0,1.0,2.0,10.0,1.0
MG: 30S ribosomal protein S7 OS=Clostridium cellulolyticum (strain ATCC 35319 / DSM 5812 / JCM 6584 / H10) GN=rpsG PE=3 SV=1 [B8I5N6] Score: 275.0	K02992	UNKNOWN	26.0,12.0,25.0,15.0,40.0,19.0,19.0,38.0,0.0,0.0,0.0,0.0,29.0,5.0,2.0,9.0,15.0,2.0,0.0,1.0,17.0,10.0,6.0,9.0,12.0,6.0,2.0,5.0,4.0,5.0,0.0,1.0,1.0,15.0,20.0,10.0,7.0,0.0,1.0,2.0,0.0,0.0,5.0,0.0
EFTS_ACICJ Elongation factor Ts OS=Acidiphilium cryptum (strain JF-5) GN=tsf PE=3 SV=1	K02357	UNKNOWN	0.0,0.0,0.0,0.0,0.0,0.0,1.0,0.0,0.0,0.0,0.0,0.0,0.0,0.0,0.0,0.0,0.0,0.0,0.0,0.0,0.0,0.0,0.0,0.0,0.0,0.0,0.0,0.0,0.0,0.0,0.0,0.0,0.0,0.0,0.0,0.0,0.0,0.0,0.0,0.0,0.0,0.0,0.0,0.0
MG: Translation initiation factor IF-1 1 OS=Desulfovibrio vulgaris (strain Hildenborough / ATCC 29579 / NCIMB 8303) GN=infA1 PE=3 SV=1 [P61686] Score: 108.0	K02518	UNKNOWN	0.0,0.0,0.0,0.0,0.0,0.0,0.0,3.0,1.0,2.0,1.0,2.0,1.0,0.0,0.0,0.0,0.0,0.0,0.0,0.0,0.0,0.0,0.0,0.0,0.0,4.0,3.0,3.0,0.0,0.0,0.0,0.0,0.0,0.0,2.0,0.0,0.0,0.0,0.0,1.0,0.0,0.0,0.0,0.0
HIS2_STRGC Phosphoribosyl-ATP pyrophosphatase OS=Streptococcus gordonii (strain Challis / ATCC 35105 / CH1 / DL1 / V288) GN=hisE PE=3 SV=1	K01523	3.6.1.31	0.0,0.0,0.0,0.0,0.0,0.0,0.0,0.0,0.0,0.0,0.0,0.0,0.0,0.0,0.0,0.0,0.0,0.0,0.0,0.0,0.0,0.0,0.0,0.0,0.0,0.0,0.0,0.0,0.0,0.0,0.0,0.0,0.0,0.0,0.0,0.0,0.0,0.0,2.0,2.0,0.0,0.0,0.0,0.0
MG: Protein oar OS=Myxococcus xanthus GN=oar PE=1 SV=1 [P38370] Score: 73.2	UNKNOWN	UNKNOWN	154.0,109.0,278.0,177.0,140.0,232.0,246.0,70.0,74.0,76.0,70.0,38.0,1.0,0.0,0.0,0.0,0.0,0.0,0.0,0.0,292.0,378.0,328.0,343.0,20.0,14.0,14.0,10.0,20.0,43.0,25.0,52.0,11.0,8.0,60.0,29.0,14.0,36.0,2.0,12.0,4.0,37.0,29.0,112.0
RL15_SHEB9 50S ribosomal protein L15 OS=Shewanella baltica (strain OS195) GN=rplO PE=3 SV=1	K02876	UNKNOWN	0.0,0.0,0.0,0.0,0.0,0.0,0.0,0.0,0.0,0.0,0.0,0.0,0.0,0.0,0.0,0.0,0.0,0.0,0.0,0.0,0.0,0.0,0.0,0.0,0.0,0.0,0.0,0.0,0.0,0.0,0.0,0.0,0.0,0.0,0.0,0.0,0.0,0.0,0.0,0.0,0.0,0.0,8.0,0.0
CORO7_PONAB Coronin-7 OS=Pongo abelii GN=CORO7 PE=2 SV=1	K18619	UNKNOWN	0.0,0.0,0.0,0.0,0.0,0.0,0.0,0.0,0.0,0.0,0.0,0.0,0.0,0.0,0.0,0.0,0.0,0.0,0.0,0.0,0.0,0.0,0.0,0.0,0.0,0.0,0.0,0.0,0.0,0.0,0.0,0.0,0.0,0.0,0.0,0.0,0.0,0.0,0.0,0.0,1.0,0.0,0.0,0.0
MG: N5-carboxyaminoimidazole ribonucleotide mutase OS=Bacillus subtilis (strain 168) GN=purE PE=3 SV=1 [P12044] Score: 192.0	K01588	5.4.99.18	1.0,0.0,1.0,0.0,0.0,0.0,0.0,0.0,0.0,0.0,0.0,0.0,3.0,0.0,0.0,5.0,4.0,0.0,0.0,0.0,0.0,0.0,0.0,0.0,10.0,5.0,2.0,2.0,0.0,1.0,0.0,0.0,0.0,0.0,0.0,0.0,0.0,0.0,3.0,3.0,0.0,0.0,0.0,0.0
MG: Probable glycine cleavage system H protein OS=Aeropyrum pernix (strain ATCC 700893 / DSM 11879 / JCM 9820 / NBRC 100138 / K1) GN=gcvH PE=3 SV=2 [Q9YDG2] Score: 125.0	K02437	UNKNOWN	0.0,0.0,0.0,0.0,0.0,0.0,0.0,0.0,4.0,3.0,3.0,2.0,0.0,0.0,0.0,0.0,0.0,0.0,0.0,0.0,0.0,0.0,0.0,0.0,0.0,0.0,0.0,0.0,0.0,0.0,0.0,0.0,0.0,0.0,0.0,0.0,0.0,0.0,1.0,1.0,0.0,0.0,0.0,0.0
MG: Beta-galactosidase BgaA OS=Clostridium cellulovorans (strain ATCC 35296 / DSM 3052 / OCM 3 / 743B) GN=bgaA PE=1 SV=1 [D9SM34] Score: 474.0	K12308	3.2.1.23	0.0,0.0,0.0,0.0,0.0,0.0,0.0,0.0,0.0,0.0,0.0,0.0,0.0,0.0,0.0,0.0,0.0,0.0,0.0,0.0,0.0,0.0,1.0,1.0,0.0,0.0,0.0,0.0,0.0,0.0,0.0,0.0,0.0,0.0,0.0,0.0,0.0,0.0,0.0,0.0,0.0,0.0,0.0,0.0
DAPB_ACICJ 4-hydroxy-tetrahydrodipicolinate reductase OS=Acidiphilium cryptum (strain JF-5) GN=dapB PE=3 SV=1	K00215	1.17.1.8	0.0,0.0,0.0,0.0,0.0,0.0,0.0,0.0,0.0,0.0,0.0,0.0,0.0,0.0,0.0,0.0,0.0,0.0,0.0,0.0,0.0,0.0,0.0,0.0,0.0,0.0,0.0,0.0,0.0,0.0,0.0,0.0,0.0,0.0,0.0,0.0,0.0,0.0,0.0,0.0,0.0,0.0,1.0,0.0
RL22_LACDA 50S ribosomal protein L22 OS=Lactobacillus delbrueckii subsp. bulgaricus (strain ATCC 11842 / DSM 20081 / JCM 1002 / NBRC 13953 / NCIMB 11778) GN=rplV PE=3 SV=1	K02890	UNKNOWN	2.0,2.0,1.0,2.0,0.0,0.0,0.0,0.0,0.0,0.0,0.0,0.0,0.0,0.0,0.0,0.0,0.0,0.0,0.0,0.0,0.0,0.0,0.0,0.0,0.0,0.0,0.0,0.0,0.0,0.0,0.0,0.0,0.0,0.0,0.0,0.0,0.0,2.0,0.0,0.0,0.0,0.0,0.0,0.0
RS12_METPB 30S ribosomal protein S12 OS=Methylobacterium populi (strain ATCC BAA-705 / NCIMB 13946 / BJ001) GN=rpsL PE=3 SV=1	K02950	UNKNOWN	0.0,0.0,0.0,0.0,0.0,0.0,25.0,0.0,0.0,0.0,0.0,0.0,14.0,19.0,16.0,4.0,5.0,3.0,0.0,0.0,0.0,0.0,0.0,0.0,0.0,0.0,0.0,0.0,0.0,0.0,0.0,0.0,0.0,0.0,0.0,0.0,0.0,0.0,0.0,0.0,0.0,0.0,0.0,0.0
MG: 30S ribosomal protein S13 OS=Heliobacterium modesticaldum (strain ATCC 51547 / Ice1) GN=rpsM PE=3 SV=1 [B0TC82] Score: 194.0	K02952	UNKNOWN	15.0,12.0,15.0,20.0,4.0,3.0,9.0,15.0,2.0,1.0,3.0,2.0,25.0,11.0,11.0,29.0,7.0,8.0,2.0,13.0,7.0,6.0,4.0,4.0,0.0,2.0,1.0,2.0,3.0,12.0,3.0,5.0,3.0,4.0,16.0,9.0,7.0,4.0,3.0,3.0,0.0,0.0,2.0,0.0
DRPD_CRAPL Desiccation-related protein PCC27-45 OS=Craterostigma plantagineum PE=2 SV=1	UNKNOWN	UNKNOWN	0.0,0.0,0.0,0.0,0.0,0.0,0.0,0.0,0.0,1.0,0.0,0.0,0.0,0.0,0.0,0.0,0.0,0.0,0.0,0.0,0.0,0.0,0.0,0.0,0.0,0.0,0.0,0.0,0.0,0.0,0.0,0.0,0.0,0.0,0.0,0.0,0.0,0.0,0.0,0.0,0.0,0.0,0.0,0.0
MG: Neuropilin-1a OS=Danio rerio GN=nrp1a PE=2 SV=1 [Q8QFX6] Score: 69.7	UNKNOWN	UNKNOWN	0.0,0.0,0.0,0.0,0.0,0.0,0.0,0.0,0.0,0.0,0.0,0.0,0.0,0.0,0.0,0.0,0.0,0.0,0.0,0.0,2.0,1.0,4.0,3.0,0.0,0.0,0.0,0.0,0.0,2.0,1.0,1.0,0.0,0.0,0.0,0.0,0.0,0.0,0.0,0.0,0.0,0.0,0.0,0.0
MG: Methanogen homoaconitase small subunit OS=Methanothermobacter thermautotrophicus (strain ATCC 29096 / DSM 1053 / JCM 10044 / NBRC 100330 / Delta H) GN=hacB PE=3 SV=1 [O26917] Score: 142.0	K16793	4.2.1.114	2.0,4.0,0.0,0.0,0.0,0.0,0.0,0.0,0.0,0.0,0.0,0.0,0.0,0.0,0.0,0.0,0.0,0.0,0.0,0.0,1.0,0.0,0.0,0.0,2.0,0.0,0.0,0.0,0.0,0.0,0.0,0.0,0.0,0.0,0.0,0.0,0.0,0.0,0.0,0.0,0.0,0.0,0.0,0.0
SYFB_PROMA Phenylalanine--tRNA ligase beta subunit OS=Prochlorococcus marinus (strain SARG / CCMP1375 / SS120) GN=pheT PE=3 SV=1	K01890	6.1.1.20	0.0,0.0,0.0,0.0,0.0,0.0,0.0,0.0,0.0,0.0,0.0,0.0,0.0,0.0,0.0,0.0,0.0,0.0,0.0,1.0,0.0,0.0,0.0,0.0,0.0,0.0,0.0,0.0,0.0,0.0,0.0,0.0,0.0,0.0,0.0,0.0,0.0,0.0,0.0,0.0,0.0,0.0,0.0,0.0
YR748_MIMIV Putative ankyrin repeat protein R748 OS=Acanthamoeba polyphaga mimivirus GN=MIMI_R748 PE=4 SV=1	UNKNOWN	UNKNOWN	6.0,2.0,1.0,2.0,1.0,2.0,0.0,0.0,0.0,0.0,0.0,0.0,0.0,0.0,0.0,0.0,0.0,0.0,0.0,0.0,0.0,0.0,0.0,0.0,0.0,0.0,0.0,0.0,0.0,0.0,0.0,0.0,0.0,0.0,0.0,0.0,0.0,0.0,0.0,0.0,0.0,0.0,0.0,0.0
[truncated: 15,610 more rows]
