# Supplementary material for: MPA_Pathway_Tool: User-Friendly, Automatic Assignment of Microbial Community Data on Metabolic Pathways
Source: Int J Mol Sci. 2021 Oct 12;22(20):10992. doi: 10.3390/ijms222010992 (PMC8539661; doi:10.3390/ijms222010992)
Supplement: Supplementary file 1 [file ijms-22-10992-s001.zip › Supp. file 9_Metaproteomics data.csv]

id	koNumbers	ecNumbers	superkingdom	kingdom	phylum	class	order	family	genus	species	description	BGP_02_T1_Ext1	BGP_02_T1_Ext2	BGP_02_T2_Ext1	BGP_02_T2_Ext2	BGP_03_T1_Ext1	BGP_03_T1_Ext2	BGP_03_T2_Ext1	BGP_03_T2_Ext2	BGP_04_T1_Ext1	BGP_04_T1_Ext2	BGP_04_T2_Ext1	BGP_04_T2_Ext2	BGP_05a_T1_Ext1	BGP_05a_T1_Ext2	BGP_05a_T2_Ext1	BGP_05a_T2_Ext2	BGP_05b_T1_Ext1	BGP_05b_T1_Ext2	BGP_05b_T2_Ext1	BGP_05b_T2_Ext2	BGP_07_T1_Ext1	BGP_07_T1_Ext2	BGP_07_T2_Ext1	BGP_07_T2_Ext2	BGP_09_T1_Ext1	BGP_09_T1_Ext2	BGP_09_T2_Ext1	BGP_09_T2_Ext2	BGP_10_T1_Ext1	BGP_10_T1_Ext2	BGP_10_T2_Ext1	BGP_10_T2_Ext2	BGP_X1_T1_Ext1	BGP_X1_T1_Ext2	BGP_X1_T2_Ext1	BGP_X1_T2_Ext2	BGP_X2_T1_Ext1	BGP_X2_T1_Ext2
Y778_AERPE Putative HTH-type transcriptional regulatory protein APE_0778 OS=Aeropyrum pernix (strain ATCC 700893 / DSM 11879 / JCM 9820 / NBRC 100138 / K1) GN=APE_0778 PE=3 SV=1	K07728	-	Archaea	Unknown	Crenarchaeota	Thermoprotei	Desulfurococcales	Desulfurococcaceae	Aeropyrum	Aeropyrum pernix	-	1	1	0	2	0	0	0	0	0	0	0	0	0	0	0	0	0	0	0	0	0	0	0	0	0	0	0	0	0	0	0	0	0	0	0	0	0	0
ALBA2_AERPE no description	K03622	-	Archaea	Unknown	Crenarchaeota	Thermoprotei	Desulfurococcales	Desulfurococcaceae	Aeropyrum	Aeropyrum pernix	-	1	0	0	0	0	0	0	0	0	0	0	0	0	0	0	0	0	0	0	0	1	0	0	0	0	0	0	0	0	0	0	0	0	0	0	0	0	0
G1PDH_AERPE Glycerol-1-phosphate dehydrogenase [NAD(P)+] OS=Aeropyrum pernix (strain ATCC 700893 / DSM 11879 / JCM 9820 / NBRC 100138 / K1) GN=egsA PE=1 SV=2	K00096	1.1.1.261	Archaea	Unknown	Crenarchaeota	Thermoprotei	Desulfurococcales	Desulfurococcaceae	Aeropyrum	Aeropyrum pernix	-	0	0	0	0	0	0	0	1	0	0	0	0	0	0	0	0	0	0	0	0	0	0	0	0	0	0	0	0	0	0	0	0	0	0	0	0	0	0
MG: Uncharacterized protein APE_1940.1 OS=Aeropyrum pernix (strain ATCC 700893 / DSM 11879 / JCM 9820 / NBRC 100138 / K1) GN=APE_1940.1 PE=3 SV=2 [Q9YAK0] Score: 146.0	K08094	-	Archaea	Unknown	Crenarchaeota	Thermoprotei	Desulfurococcales	Desulfurococcaceae	Aeropyrum	Aeropyrum pernix	-	0	0	0	0	0	0	0	0	8	7	9	10	18	14	16	20	30	16	7	16	0	0	0	0	0	2	3	4	0	0	1	1	0	0	0	0	0	0
MG: Probable glycine cleavage system H protein OS=Aeropyrum pernix (strain ATCC 700893 / DSM 11879 / JCM 9820 / NBRC 100138 / K1) GN=gcvH PE=3 SV=2 [Q9YDG2] Score: 125.0	K02437	-	Archaea	Unknown	Crenarchaeota	Thermoprotei	Desulfurococcales	Desulfurococcaceae	Aeropyrum	Aeropyrum pernix	-	0	0	0	0	0	0	0	0	4	3	3	2	0	0	0	0	0	0	0	0	0	0	0	0	0	0	0	0	0	0	0	0	0	0	0	0	0	0
PUS10_AERPE tRNA pseudouridine synthase Pus10 OS=Aeropyrum pernix (strain ATCC 700893 / DSM 11879 / JCM 9820 / NBRC 100138 / K1) GN=pus10 PE=3 SV=2	K07583	5.4.99.-	Archaea	Unknown	Crenarchaeota	Thermoprotei	Desulfurococcales	Desulfurococcaceae	Aeropyrum	Aeropyrum pernix	-	0	0	0	0	0	0	0	0	0	1	0	0	0	0	0	0	0	0	0	0	0	0	0	0	0	0	0	0	0	0	0	0	0	0	0	0	0	0
GYAR_AERPE Glyoxylate reductase OS=Aeropyrum pernix (strain ATCC 700893 / DSM 11879 / JCM 9820 / NBRC 100138 / K1) GN=gyaR PE=3 SV=2	K00015	1.1.1.26	Archaea	Unknown	Crenarchaeota	Thermoprotei	Desulfurococcales	Desulfurococcaceae	Aeropyrum	Aeropyrum pernix	-	0	0	0	0	0	0	0	0	0	0	0	0	0	0	0	0	0	0	0	0	0	0	1	0	0	0	0	0	0	0	0	0	0	0	0	0	0	0
MG: 3-hydroxy-3-methylglutaryl-coenzyme A reductase OS=Aeropyrum pernix (strain ATCC 700893 / DSM 11879 / JCM 9820 / NBRC 100138 / K1) GN=hmgA PE=3 SV=1 [Q9YAS4] Score: 249.0	K00021	1.1.1.34	Archaea	Unknown	Crenarchaeota	Thermoprotei	Desulfurococcales	Desulfurococcaceae	Aeropyrum	Aeropyrum pernix	-	0	0	0	0	0	0	0	0	0	0	0	0	0	0	0	0	0	0	0	0	0	0	0	0	0	0	0	0	1	0	0	0	0	0	0	0	0	0
Y207_AERPE UPF0148 protein APE_0207 OS=Aeropyrum pernix (strain ATCC 700893 / DSM 11879 / JCM 9820 / NBRC 100138 / K1) GN=APE_0207 PE=3 SV=1	K07143	-	Archaea	Unknown	Crenarchaeota	Thermoprotei	Desulfurococcales	Desulfurococcaceae	Aeropyrum	Aeropyrum pernix	-	0	0	0	0	0	0	0	0	0	0	0	0	0	0	0	0	0	0	0	0	0	0	0	0	0	0	0	0	0	0	0	0	0	0	1	0	0	0
AROC_AERPE Chorismate synthase OS=Aeropyrum pernix (strain ATCC 700893 / DSM 11879 / JCM 9820 / NBRC 100138 / K1) GN=aroC PE=3 SV=1	K01736	4.2.3.5	Archaea	Unknown	Crenarchaeota	Thermoprotei	Desulfurococcales	Desulfurococcaceae	Aeropyrum	Aeropyrum pernix	-	0	0	0	0	0	0	0	0	0	0	0	0	0	0	0	0	0	0	0	0	0	0	0	0	0	0	0	0	0	0	0	0	0	0	0	0	0	0
MG: Phosphoribosylformylglycinamidine synthase subunit PurL OS=Ignicoccus hospitalis (strain KIN4/I / DSM 18386 / JCM 14125) GN=purL PE=3 SV=1 [A8ABX6] Score: 166.0	K01952	6.3.5.3	Archaea	Unknown	Crenarchaeota	Thermoprotei	Desulfurococcales	Desulfurococcaceae	Ignicoccus	Ignicoccus hospitalis	-	0	0	0	0	0	0	0	0	0	0	0	0	0	0	1	0	0	0	0	0	0	0	0	0	0	0	0	0	0	0	0	0	0	0	0	1	0	0
CRCB_IGNH4 Putative fluoride ion transporter CrcB OS=Ignicoccus hospitalis (strain KIN4/I / DSM 18386 / JCM 14125) GN=crcB PE=3 SV=1	K06199	-	Archaea	Unknown	Crenarchaeota	Thermoprotei	Desulfurococcales	Desulfurococcaceae	Ignicoccus	Ignicoccus hospitalis	-	0	0	0	0	0	0	0	0	0	0	0	0	0	0	0	0	0	0	0	0	0	0	0	0	0	0	0	0	0	0	0	0	0	0	0	0	0	0
MG: Phosphoenolpyruvate synthase OS=Aeropyrum pernix (strain ATCC 700893 / DSM 11879 / JCM 9820 / NBRC 100138 / K1) GN=ppsA PE=3 SV=2 [Q9YEC5] Score: 50.1	K01007	2.7.9.2	Archaea	Unknown	Crenarchaeota	Thermoprotei	Desulfurococcales	Desulfurococcaceae	Unknown	Unknown	-	0	0	0	0	0	0	0	0	0	0	0	0	1	0	0	0	0	0	1	0	0	0	0	0	0	0	0	2	0	0	1	0	0	0	0	0	0	0
RTCA_STAMF RNA 3'-terminal phosphate cyclase OS=Staphylothermus marinus (strain ATCC 43588 / DSM 3639 / JCM 9404 / F1) GN=rtcA PE=3 SV=2	K01974	6.5.1.4	Archaea	Unknown	Crenarchaeota	Thermoprotei	Desulfurococcales	Desulfurococcaceae	Staphylothermus	Staphylothermus marinus	-	0	0	0	0	0	0	0	0	0	0	0	0	0	0	0	0	0	0	0	0	1	0	0	0	0	0	0	0	0	0	0	0	0	0	0	0	0	0
RL2_STAMF 50S ribosomal protein L2 OS=Staphylothermus marinus (strain ATCC 43588 / DSM 3639 / JCM 9404 / F1) GN=rpl2 PE=3 SV=1	K02886	-	Archaea	Unknown	Crenarchaeota	Thermoprotei	Desulfurococcales	Desulfurococcaceae	Staphylothermus	Staphylothermus marinus	-	0	0	0	0	0	0	0	0	0	0	0	0	0	0	0	0	0	0	0	0	0	0	0	0	0	0	0	0	0	0	0	1	0	0	0	0	0	0
RNP1_HYPBU Ribonuclease P protein component 1 OS=Hyperthermus butylicus (strain DSM 5456 / JCM 9403 / PLM1-5) GN=rnp1 PE=3 SV=1	K03538	3.1.26.5	Archaea	Unknown	Crenarchaeota	Thermoprotei	Desulfurococcales	Pyrodictiaceae	Hyperthermus	Hyperthermus butylicus	-	1	0	0	0	0	0	0	0	0	0	0	0	0	0	0	0	0	0	0	0	0	0	0	0	0	0	0	0	0	0	0	0	0	0	0	0	0	0
IF2P_HYPBU Probable translation initiation factor IF-2 OS=Hyperthermus butylicus (strain DSM 5456 / JCM 9403 / PLM1-5) GN=infB PE=3 SV=1	K03243	-	Archaea	Unknown	Crenarchaeota	Thermoprotei	Desulfurococcales	Pyrodictiaceae	Hyperthermus	Hyperthermus butylicus	-	0	0	1	0	0	0	0	0	0	0	0	0	0	0	0	0	0	0	0	0	0	0	0	0	0	0	0	0	0	0	0	0	0	0	0	0	0	0
SYT_HYPBU Threonine--tRNA ligase OS=Hyperthermus butylicus (strain DSM 5456 / JCM 9403 / PLM1-5) GN=thrS PE=3 SV=1	K01868	6.1.1.3	Archaea	Unknown	Crenarchaeota	Thermoprotei	Desulfurococcales	Pyrodictiaceae	Hyperthermus	Hyperthermus butylicus	-	0	0	0	0	0	0	0	0	0	0	0	0	1	0	0	0	0	1	0	0	0	0	0	0	0	0	0	0	0	0	0	0	0	0	0	0	0	0
MG: Succinyl-CoA ligase [ADP-forming] subunit beta OS=Pyrobaculum calidifontis (strain JCM 11548 / VA1) GN=sucC PE=3 SV=1 [A3MWQ7] Score: 323.0	K01903	6.2.1.5	Archaea	Unknown	Crenarchaeota	Thermoprotei	Unknown	Unknown	Unknown	Unknown	-	14	7	7	3	115	73	137	127	16	18	14	4	0	0	0	0	0	0	0	0	37	40	73	45	1	0	1	3	2	1	4	8	4	7	12	10	0	3
MG: Probable glycine dehydrogenase (decarboxylating) subunit 1 OS=Staphylothermus marinus (strain ATCC 43588 / DSM 3639 / F1) GN=gcvPA PE=3 SV=1 [A3DNJ9] Score: 146.0	K00282	1.4.4.2	Archaea	Unknown	Crenarchaeota	Thermoprotei	Unknown	Unknown	Unknown	Unknown	-	0	0	0	0	0	2	8	14	18	14	8	2	0	0	0	0	0	0	0	0	0	0	0	0	0	0	0	0	0	1	0	0	8	5	4	4	0	0
MG: Glutamate dehydrogenase OS=Aeropyrum pernix (strain ATCC 700893 / DSM 11879 / JCM 9820 / NBRC 100138 / K1) GN=gdhA PE=3 SV=2 [Q9YC65] Score: 195.0	K00261	1.4.1.3	Archaea	Unknown	Crenarchaeota	Thermoprotei	Unknown	Unknown	Unknown	Unknown	-	0	0	0	0	0	0	1	1	0	0	0	0	0	0	0	0	0	0	0	0	0	0	0	0	0	0	0	1	0	0	0	0	0	0	1	0	0	0
MG: Probable cobalt-precorrin-6B C(15)-methyltransferase (decarboxylating) OS=Pyrobaculum calidifontis (strain JCM 11548 / VA1) GN=cbiT PE=3 SV=1 [A3MWC5] Score: 149.0	K02191	2.1.1.196	Archaea	Unknown	Crenarchaeota	Thermoprotei	Unknown	Unknown	Unknown	Unknown	-	0	0	0	0	0	0	0	0	1	0	0	0	0	0	2	0	0	0	0	0	0	0	0	0	0	0	0	0	0	0	1	0	0	0	0	0	0	0
PURP_SULAC 5-formaminoimidazole-4-carboxamide-1-(beta)-D-ribofuranosyl 5'-monophosphate synthetase OS=Sulfolobus acidocaldarius (strain ATCC 33909 / DSM 639 / JCM 8929 / NBRC 15157 / NCIMB 11770) GN=purP PE=3 SV=1	K06863	6.3.4.23	Archaea	Unknown	Crenarchaeota	Thermoprotei	Unknown	Unknown	Unknown	Unknown	-	0	0	0	0	0	0	0	0	0	0	0	0	1	0	0	1	0	0	0	0	0	0	0	0	0	0	0	0	1	0	0	0	0	0	0	0	0	0
SYA_SULSO Alanine--tRNA ligase OS=Sulfolobus solfataricus (strain ATCC 35092 / DSM 1617 / JCM 11322 / P2) GN=alaS PE=3 SV=2	K01872	6.1.1.7	Archaea	Unknown	Crenarchaeota	Thermoprotei	Unknown	Unknown	Unknown	Unknown	-	0	0	0	0	0	0	0	0	0	0	0	0	2	0	2	0	0	0	0	0	0	0	0	0	0	0	0	0	0	0	0	0	0	0	0	0	0	0
MG: Sulfide-quinone reductase OS=Acidianus ambivalens GN=sqr PE=1 SV=1 [Q7ZAG8] Score: 94.4	-	1.8.5.4	Archaea	Unknown	Crenarchaeota	Thermoprotei	Sulfolobales	Sulfolobaceae	Acidianus	Acidianus ambivalens	-	0	0	0	2	1	0	5	3	6	5	3	8	2	1	2	1	1	3	0	0	2	1	2	0	2	4	3	4	0	1	4	4	7	7	5	0	4	5
RL11_ACIAM 50S ribosomal protein L11 (Fragment) OS=Acidianus ambivalens GN=rpl11 PE=3 SV=1	-	-	Archaea	Unknown	Crenarchaeota	Thermoprotei	Sulfolobales	Sulfolobaceae	Acidianus	Acidianus ambivalens	-	0	0	0	0	0	0	0	0	1	0	0	0	0	0	0	0	0	0	0	0	0	0	0	0	0	0	0	1	0	0	0	0	0	0	0	0	0	0
RS4E_METS5 30S ribosomal protein S4e OS=Metallosphaera sedula (strain ATCC 51363 / DSM 5348) GN=rps4e PE=3 SV=1	K02987	-	Archaea	Unknown	Crenarchaeota	Thermoprotei	Sulfolobales	Sulfolobaceae	Metallosphaera	Metallosphaera sedula	-	0	0	0	0	0	0	0	2	0	0	0	0	0	0	0	0	0	0	0	0	0	0	0	0	0	0	0	0	0	0	0	0	0	0	0	0	0	0
SYM_METS5 Methionine--tRNA ligase OS=Metallosphaera sedula (strain ATCC 51363 / DSM 5348) GN=metG PE=3 SV=1	K01874	6.1.1.10	Archaea	Unknown	Crenarchaeota	Thermoprotei	Sulfolobales	Sulfolobaceae	Metallosphaera	Metallosphaera sedula	-	0	0	0	0	0	0	0	0	0	0	0	0	1	0	0	0	0	0	0	0	0	0	0	0	0	0	0	0	0	0	0	0	0	0	0	0	0	0
ASSY_METS5 Argininosuccinate synthase OS=Metallosphaera sedula (strain ATCC 51363 / DSM 5348) GN=argG PE=3 SV=1	K01940	6.3.4.5	Archaea	Unknown	Crenarchaeota	Thermoprotei	Sulfolobales	Sulfolobaceae	Metallosphaera	Metallosphaera sedula	-	0	0	0	0	0	0	0	0	0	0	0	0	0	0	0	0	0	0	0	0	1	0	0	0	0	0	0	0	0	0	0	0	0	0	0	0	0	0
SYH_METS5 Histidine--tRNA ligase OS=Metallosphaera sedula (strain ATCC 51363 / DSM 5348) GN=hisS PE=3 SV=1	K01892	6.1.1.21	Archaea	Unknown	Crenarchaeota	Thermoprotei	Sulfolobales	Sulfolobaceae	Metallosphaera	Metallosphaera sedula	-	0	0	0	0	0	0	0	0	0	0	0	0	0	0	0	0	0	0	0	0	0	0	0	0	0	0	0	0	0	0	0	0	0	0	0	0	0	0
MG: Serine hydroxymethyltransferase OS=Sulfolobus solfataricus (strain ATCC 35092 / DSM 1617 / JCM 11322 / P2) GN=glyA PE=1 SV=1 [Q9UWT5] Score: 309.0	K00600	2.1.2.-	Archaea	Unknown	Crenarchaeota	Thermoprotei	Sulfolobales	Sulfolobaceae	Sulfolobus	Unknown	-	0	0	0	0	0	0	0	0	0	0	0	0	0	0	1	1	0	0	0	0	0	0	0	0	0	0	0	0	0	0	0	0	0	0	0	0	0	0
RL4_SULAC 50S ribosomal protein L4 OS=Sulfolobus acidocaldarius (strain ATCC 33909 / DSM 639 / JCM 8929 / NBRC 15157 / NCIMB 11770) GN=rpl4 PE=3 SV=1	K02930	-	Archaea	Unknown	Crenarchaeota	Thermoprotei	Sulfolobales	Sulfolobaceae	Sulfolobus	Sulfolobus acidocaldarius	-	0	0	0	0	0	0	0	0	0	0	0	0	0	1	0	0	0	0	0	0	0	0	0	0	0	0	0	0	0	0	0	0	0	0	0	0	0	0
MG: Archaeal glycosylation protein 16 OS=Sulfolobus acidocaldarius (strain ATCC 33909 / DSM 639 / JCM 8929 / NBRC 15157 / NCIMB 11770) GN=agl16 PE=3 SV=1 [Q4JAK2] Score: 48.9	-	2.4.1.-	Archaea	Unknown	Crenarchaeota	Thermoprotei	Sulfolobales	Sulfolobaceae	Sulfolobus	Sulfolobus acidocaldarius	-	0	0	0	0	0	0	0	0	0	0	0	0	0	1	0	0	0	0	0	0	0	0	0	0	0	0	0	0	0	0	0	0	0	0	0	0	0	0
MG: Tyrosine--tRNA ligase OS=Sulfolobus acidocaldarius (strain ATCC 33909 / DSM 639 / JCM 8929 / NBRC 15157 / NCIMB 11770) GN=tyrS PE=3 SV=1 [Q4JCH6] Score: 269.0	K01866	6.1.1.1	Archaea	Unknown	Crenarchaeota	Thermoprotei	Sulfolobales	Sulfolobaceae	Sulfolobus	Sulfolobus acidocaldarius	-	0	0	0	0	0	0	0	0	0	0	0	0	0	0	0	0	0	0	0	0	0	0	0	0	0	0	0	0	1	0	0	0	0	0	0	0	0	0
NADE_SULAC NH(3)-dependent NAD(+) synthetase OS=Sulfolobus acidocaldarius (strain ATCC 33909 / DSM 639 / JCM 8929 / NBRC 15157 / NCIMB 11770) GN=nadE PE=3 SV=1	K01916	6.3.1.5	Archaea	Unknown	Crenarchaeota	Thermoprotei	Sulfolobales	Sulfolobaceae	Sulfolobus	Sulfolobus acidocaldarius	-	0	0	0	0	0	0	0	0	0	0	0	0	0	0	0	0	0	0	0	0	0	0	0	0	0	0	0	0	0	0	0	0	1	0	0	0	0	0
ATGT_SULAC tRNA-guanine(15) transglycosylase OS=Sulfolobus acidocaldarius (strain ATCC 33909 / DSM 639 / JCM 8929 / NBRC 15157 / NCIMB 11770) GN=tgtA PE=3 SV=1	K18779	2.4.2.48	Archaea	Unknown	Crenarchaeota	Thermoprotei	Sulfolobales	Sulfolobaceae	Sulfolobus	Sulfolobus acidocaldarius	-	0	0	0	0	0	0	0	0	0	0	0	0	0	0	0	0	0	0	0	0	0	0	0	0	0	0	0	0	0	0	0	0	0	1	0	0	0	0
MG: Undecaprenyl-diphosphatase OS=Sulfolobus acidocaldarius (strain ATCC 33909 / DSM 639 / JCM 8929 / NBRC 15157 / NCIMB 11770) GN=sepP PE=1 SV=2 [P80143] Score: 59.7	-	3.6.1.27	Archaea	Unknown	Crenarchaeota	Thermoprotei	Sulfolobales	Sulfolobaceae	Sulfolobus	Sulfolobus acidocaldarius	-	0	0	0	0	0	0	0	0	0	0	0	0	0	0	0	0	0	0	0	0	0	0	0	0	0	0	0	0	0	0	0	0	0	0	0	0	0	0
MG: Nucleoside diphosphate kinase OS=Sulfolobus islandicus (strain L.S.2.15 / Lassen #1) GN=ndk PE=3 SV=1 [C3MRJ9] Score: 157.0	K00940	2.7.4.6	Archaea	Unknown	Crenarchaeota	Thermoprotei	Sulfolobales	Sulfolobaceae	Sulfolobus	Sulfolobus islandicus	-	0	0	0	0	0	0	0	0	2	0	2	0	0	0	0	0	0	0	0	0	1	3	0	0	0	0	0	0	0	0	0	0	0	0	3	5	0	0
MG: MEMO1 family protein M164_2061 OS=Sulfolobus islandicus (strain M.16.4 / Kamchatka #3) GN=M164_2061 PE=3 SV=1 [C4KJ99] Score: 53.1	K06990	-	Archaea	Unknown	Crenarchaeota	Thermoprotei	Sulfolobales	Sulfolobaceae	Sulfolobus	Sulfolobus islandicus	-	0	0	0	0	0	0	0	0	0	0	1	0	0	0	0	0	0	0	0	0	0	0	0	0	0	0	0	0	0	0	0	0	0	0	0	0	0	0
PURK_SULSO N5-carboxyaminoimidazole ribonucleotide synthase OS=Sulfolobus solfataricus (strain ATCC 35092 / DSM 1617 / JCM 11322 / P2) GN=purK PE=3 SV=1	K01589	6.3.4.18	Archaea	Unknown	Crenarchaeota	Thermoprotei	Sulfolobales	Sulfolobaceae	Sulfolobus	Sulfolobus solfataricus	-	0	1	1	0	0	0	0	0	0	0	1	0	0	0	0	0	0	0	0	0	0	0	0	0	0	0	0	0	0	0	0	0	0	0	0	0	0	0
MVK_SULSO Mevalonate kinase OS=Sulfolobus solfataricus (strain ATCC 35092 / DSM 1617 / JCM 11322 / P2) GN=mvk PE=1 SV=1	K00869	2.7.1.36	Archaea	Unknown	Crenarchaeota	Thermoprotei	Sulfolobales	Sulfolobaceae	Sulfolobus	Sulfolobus solfataricus	-	0	0	1	0	0	0	0	0	0	0	0	0	0	0	0	0	0	0	0	0	0	0	0	0	0	0	0	0	0	0	0	0	0	0	0	0	0	0
MG: Alpha-xylosidase OS=Sulfolobus solfataricus (strain ATCC 35092 / DSM 1617 / JCM 11322 / P2) GN=xylS PE=1 SV=1 [Q9P999] Score: 467.0	K01811	3.2.1.177	Archaea	Unknown	Crenarchaeota	Thermoprotei	Sulfolobales	Sulfolobaceae	Sulfolobus	Sulfolobus solfataricus	-	0	0	0	0	0	7	4	1	2	3	3	0	1	4	0	1	0	1	0	0	3	6	3	3	0	0	0	0	0	0	0	1	1	0	4	6	0	1
MG: CRISPR-associated endoribonuclease Cas2 1 OS=Sulfolobus solfataricus (strain ATCC 35092 / DSM 1617 / JCM 11322 / P2) GN=cas21 PE=1 SV=1 [Q97YC2] Score: 47.8	K09951	3.1.-.-	Archaea	Unknown	Crenarchaeota	Thermoprotei	Sulfolobales	Sulfolobaceae	Sulfolobus	Sulfolobus solfataricus	-	0	0	0	0	0	0	0	0	0	0	0	1	0	0	0	0	0	0	0	0	0	0	0	0	0	0	0	0	0	0	0	0	0	0	0	0	0	0
SYL2_SULSO Leucine--tRNA ligase 2 OS=Sulfolobus solfataricus (strain ATCC 35092 / DSM 1617 / JCM 11322 / P2) GN=leuS2 PE=3 SV=2	K01869	6.1.1.4	Archaea	Unknown	Crenarchaeota	Thermoprotei	Sulfolobales	Sulfolobaceae	Sulfolobus	Sulfolobus solfataricus	-	0	0	0	0	0	0	0	0	0	0	0	0	2	0	0	0	0	0	0	1	0	0	0	0	0	0	0	0	0	0	0	0	0	0	0	0	0	0
TF2B2_SULSO Transcription initiation factor IIB 2 OS=Sulfolobus solfataricus (strain ATCC 35092 / DSM 1617 / JCM 11322 / P2) GN=tfbB PE=3 SV=1	K03124	-	Archaea	Unknown	Crenarchaeota	Thermoprotei	Sulfolobales	Sulfolobaceae	Sulfolobus	Sulfolobus solfataricus	-	0	0	0	0	0	0	0	0	0	0	0	0	1	0	0	0	0	0	0	0	0	0	0	0	0	0	0	0	0	0	0	0	0	0	0	0	0	0
DNAG_SULSO DNA primase DnaG OS=Sulfolobus solfataricus (strain ATCC 35092 / DSM 1617 / JCM 11322 / P2) GN=dnaG PE=1 SV=2	-	2.7.7.-	Archaea	Unknown	Crenarchaeota	Thermoprotei	Sulfolobales	Sulfolobaceae	Sulfolobus	Sulfolobus solfataricus	-	0	0	0	0	0	0	0	0	0	0	0	0	0	2	0	0	0	0	0	0	0	0	0	0	0	0	0	0	0	0	0	0	0	0	0	0	0	0
MG: Uncharacterized protein SSO2899 OS=Sulfolobus solfataricus (strain ATCC 35092 / DSM 1617 / JCM 11322 / P2) GN=SSO2899 PE=3 SV=1 [Q97UU4] Score: 167.0	-	-	Archaea	Unknown	Crenarchaeota	Thermoprotei	Sulfolobales	Sulfolobaceae	Sulfolobus	Sulfolobus solfataricus	-	0	0	0	0	0	0	0	0	0	0	0	0	0	2	7	5	3	11	5	8	0	0	0	0	0	0	0	0	0	0	0	0	0	0	0	0	0	0
MG: Uncharacterized aldolase SSO3226 OS=Sulfolobus solfataricus (strain ATCC 35092 / DSM 1617 / JCM 11322 / P2) GN=SSO3226 PE=3 SV=1 [Q97U03] Score: 49.3	K11645	4.2.1.-	Archaea	Unknown	Crenarchaeota	Thermoprotei	Sulfolobales	Sulfolobaceae	Sulfolobus	Sulfolobus solfataricus	-	0	0	0	0	0	0	0	0	0	0	0	0	0	0	0	0	0	1	0	0	0	0	0	0	0	0	0	0	0	0	0	0	0	0	0	0	0	0
MG: Malto-oligosyltrehalose trehalohydrolase OS=Sulfolobus solfataricus GN=treZ PE=1 SV=2 [Q55088] Score: 129.0	-	3.2.1.141	Archaea	Unknown	Crenarchaeota	Thermoprotei	Sulfolobales	Sulfolobaceae	Sulfolobus	Sulfolobus solfataricus	-	0	0	0	0	0	0	0	0	0	0	0	0	0	0	0	0	0	0	1	0	0	0	0	0	0	0	0	0	0	0	0	0	0	0	0	0	0	0
MG: Uncharacterized ATP-dependent helicase SSO0112 OS=Sulfolobus solfataricus (strain ATCC 35092 / DSM 1617 / JCM 11322 / P2) GN=SSO0112 PE=3 SV=1 [P95949] Score: 87.8	K03724	3.6.4.-	Archaea	Unknown	Crenarchaeota	Thermoprotei	Sulfolobales	Sulfolobaceae	Sulfolobus	Sulfolobus solfataricus	-	0	0	0	0	0	0	0	0	0	0	0	0	0	0	0	0	0	0	0	0	0	0	0	0	1	0	0	0	0	0	0	0	0	0	0	0	0	0
MG: Alpha-aminoadipate--LysW ligase LysX OS=Sulfolobus solfataricus (strain ATCC 35092 / DSM 1617 / JCM 11322 / P2) GN=lysX PE=1 SV=1 [Q7SI95] Score: 74.3	K05827	6.3.2.43	Archaea	Unknown	Crenarchaeota	Thermoprotei	Sulfolobales	Sulfolobaceae	Sulfolobus	Sulfolobus solfataricus	-	0	0	0	0	0	0	0	0	0	0	0	0	0	0	0	0	0	0	0	0	0	0	0	0	0	0	0	1	0	0	0	0	0	0	0	0	0	0
RGYR1_SULSO Reverse gyrase 1 OS=Sulfolobus solfataricus (strain ATCC 35092 / DSM 1617 / JCM 11322 / P2) GN=rgy1 PE=3 SV=1	K03170	3.6.4.12|5.99.1.3	Archaea	Unknown	Crenarchaeota	Thermoprotei	Sulfolobales	Sulfolobaceae	Sulfolobus	Sulfolobus solfataricus	-	0	0	0	0	0	0	0	0	0	0	0	0	0	0	0	0	0	0	0	0	0	0	0	0	0	0	0	0	0	0	0	0	1	0	0	0	0	0
PYRC_SULSO Dihydroorotase OS=Sulfolobus solfataricus (strain ATCC 35092 / DSM 1617 / JCM 11322 / P2) GN=pyrC PE=3 SV=1	K01465	3.5.2.3	Archaea	Unknown	Crenarchaeota	Thermoprotei	Sulfolobales	Sulfolobaceae	Sulfolobus	Sulfolobus solfataricus	-	0	0	0	0	0	0	0	0	0	0	0	0	0	0	0	0	0	0	0	0	0	0	0	0	0	0	0	0	0	0	0	0	0	0	0	0	0	0
MG: Kelch domain-containing protein SSO1033 OS=Sulfolobus solfataricus (strain ATCC 35092 / DSM 1617 / JCM 11322 / P2) GN=SSO1033 PE=3 SV=1 [Q97Z97] Score: 54.3	-	-	Archaea	Unknown	Crenarchaeota	Thermoprotei	Sulfolobales	Sulfolobaceae	Sulfolobus	Sulfolobus solfataricus	-	0	0	0	0	0	0	0	0	0	0	0	0	0	0	0	0	0	0	0	0	0	0	0	0	0	0	0	0	0	0	0	0	0	0	0	0	0	0
ILVC_SULTO Ketol-acid reductoisomerase OS=Sulfolobus tokodaii (strain DSM 16993 / JCM 10545 / NBRC 100140 / 7) GN=ilvC PE=3 SV=1	K00053	1.1.1.86	Archaea	Unknown	Crenarchaeota	Thermoprotei	Sulfolobales	Sulfolobaceae	Sulfolobus	Sulfolobus tokodaii	-	11	8	5	1	4	4	1	4	3	0	2	3	0	0	1	2	0	2	0	2	0	0	0	0	0	0	0	0	6	0	3	4	0	0	0	0	4	1
MG: UPF0284 protein STK_21430 OS=Sulfolobus tokodaii (strain DSM 16993 / JCM 10545 / NBRC 100140 / 7) GN=STK_21430 PE=3 SV=1 [Q96YM9] Score: 286.0	-	-	Archaea	Unknown	Crenarchaeota	Thermoprotei	Sulfolobales	Sulfolobaceae	Sulfolobus	Sulfolobus tokodaii	-	0	0	0	0	1	0	0	0	0	0	0	0	0	0	0	0	0	0	0	0	0	0	0	0	0	0	0	0	0	0	0	0	0	0	0	0	0	0
MG: Transcription factor E OS=Sulfolobus tokodaii (strain DSM 16993 / JCM 10545 / NBRC 100140 / 7) GN=tfe PE=3 SV=1 [Q975T8] Score: 97.8	K03136	-	Archaea	Unknown	Crenarchaeota	Thermoprotei	Sulfolobales	Sulfolobaceae	Sulfolobus	Sulfolobus tokodaii	-	0	0	0	0	0	0	0	0	0	0	0	0	1	0	0	1	0	0	0	1	0	0	0	0	0	0	0	0	0	0	0	0	0	0	0	0	0	0
MG: Uncharacterized N-acetyltransferase STK_02580 OS=Sulfolobus tokodaii (strain DSM 16993 / JCM 10545 / NBRC 100140 / 7) GN=STK_02580 PE=3 SV=1 [Q976C3] Score: 46.6	K03789	2.3.1.-	Archaea	Unknown	Crenarchaeota	Thermoprotei	Sulfolobales	Sulfolobaceae	Sulfolobus	Sulfolobus tokodaii	-	0	0	0	0	0	0	0	0	0	0	0	0	0	1	0	0	0	1	0	1	0	0	0	0	0	0	0	0	0	0	0	0	0	0	0	0	0	0
TF2B1_SULSO Transcription initiation factor IIB 1 OS=Sulfolobus solfataricus (strain ATCC 35092 / DSM 1617 / JCM 11322 / P2) GN=tfbA PE=3 SV=1	K03124	-	Archaea	Unknown	Crenarchaeota	Thermoprotei	Sulfolobales	Sulfolobaceae	Sulfolobus	Unknown	-	0	0	0	0	0	0	0	0	0	0	0	0	0	0	0	0	0	0	0	0	0	0	0	0	0	0	0	0	0	0	0	1	0	0	0	0	0	0
SYE_THEPD Glutamate--tRNA ligase OS=Thermofilum pendens (strain Hrk 5) GN=gltX PE=3 SV=1	K01885	6.1.1.17	Archaea	Unknown	Crenarchaeota	Thermoprotei	Thermoproteales	Thermofilaceae	Thermofilum	Thermofilum pendens	-	0	0	0	0	0	0	0	0	0	0	0	0	0	0	0	0	0	0	0	0	0	0	0	0	0	0	0	0	0	0	0	0	0	0	0	1	0	0
NCPP_CALMQ Probable non-canonical purine NTP phosphatase OS=Caldivirga maquilingensis (strain ATCC 700844 / DSM 13496 / JCM 10307 / IC-167) GN=Cmaq_0122 PE=3 SV=1	-	3.6.1.-	Archaea	Unknown	Crenarchaeota	Thermoprotei	Thermoproteales	Thermoproteaceae	Caldivirga	Caldivirga maquilingensis	-	0	0	0	0	0	1	0	0	0	0	0	0	0	0	0	0	0	0	0	0	0	0	0	0	0	0	0	0	0	0	0	0	0	0	0	0	0	0
AUBA_CALMQ RNA-binding protein AU-1 OS=Caldivirga maquilingensis (strain ATCC 700844 / DSM 13496 / JCM 10307 / IC-167) GN=aubA PE=3 SV=1	-	-	Archaea	Unknown	Crenarchaeota	Thermoprotei	Thermoproteales	Thermoproteaceae	Caldivirga	Caldivirga maquilingensis	-	0	0	0	0	0	0	0	0	0	0	0	0	0	0	0	0	0	0	1	0	0	0	0	0	0	0	0	0	0	0	0	0	0	0	0	0	0	0
MG: NAD-dependent protein deacylase 2 OS=Pyrobaculum aerophilum (strain ATCC 51768 / IM2 / DSM 7523 / JCM 9630 / NBRC 100827) GN=cobB2 PE=3 SV=1 [Q8ZT00] Score: 227.0	K12410	3.5.1.-	Archaea	Unknown	Crenarchaeota	Thermoprotei	Thermoproteales	Thermoproteaceae	Pyrobaculum	Pyrobaculum aerophilum	-	0	0	0	0	0	0	1	1	0	0	0	0	0	0	0	0	0	0	0	0	0	3	0	0	0	0	0	0	0	0	0	0	0	0	0	0	0	0
MG: Cytidylate kinase OS=Pyrobaculum aerophilum (strain ATCC 51768 / IM2 / DSM 7523 / JCM 9630 / NBRC 100827) GN=cmk PE=3 SV=1 [Q8ZTJ1] Score: 52.4	K00945	2.7.4.25	Archaea	Unknown	Crenarchaeota	Thermoprotei	Thermoproteales	Thermoproteaceae	Pyrobaculum	Pyrobaculum aerophilum	-	0	0	0	0	0	0	0	0	0	0	1	0	0	0	0	0	0	0	0	0	0	0	0	0	0	0	0	0	0	0	0	0	0	0	0	0	0	0
MG: Glutamine--fructose-6-phosphate aminotransferase [isomerizing] OS=Pyrobaculum aerophilum (strain ATCC 51768 / IM2 / DSM 7523 / JCM 9630 / NBRC 100827) GN=glmS PE=3 SV=3 [Q8ZTZ0] Score: 116.0	K00820	2.6.1.16	Archaea	Unknown	Crenarchaeota	Thermoprotei	Thermoproteales	Thermoproteaceae	Pyrobaculum	Pyrobaculum aerophilum	-	0	0	0	0	0	0	0	0	0	0	0	0	5	4	5	2	5	2	2	0	0	0	0	0	0	0	0	0	0	0	0	0	0	0	0	0	0	0
MG: Putative ankyrin repeat protein PAE1861 OS=Pyrobaculum aerophilum (strain ATCC 51768 / IM2 / DSM 7523 / JCM 9630 / NBRC 100827) GN=PAE1861 PE=3 SV=1 [Q8ZWC4] Score: 67.8	K06867	-	Archaea	Unknown	Crenarchaeota	Thermoprotei	Thermoproteales	Thermoproteaceae	Pyrobaculum	Pyrobaculum aerophilum	-	0	0	0	0	0	0	0	0	0	0	0	0	0	0	0	0	0	0	0	0	2	0	0	0	0	0	0	0	0	0	0	0	0	0	0	0	0	0
MG: NAD-dependent protein deacetylase 1 OS=Pyrobaculum aerophilum (strain ATCC 51768 / IM2 / DSM 7523 / JCM 9630 / NBRC 100827) GN=cobB1 PE=3 SV=1 [Q8ZU41] Score: 210.0	K12410	3.5.1.-	Archaea	Unknown	Crenarchaeota	Thermoprotei	Thermoproteales	Thermoproteaceae	Pyrobaculum	Pyrobaculum aerophilum	-	0	0	0	0	0	0	0	0	0	0	0	0	0	0	0	0	0	0	0	0	0	2	0	0	0	0	0	0	0	0	0	0	0	0	0	0	0	0
SYI_PYRAE Isoleucine--tRNA ligase OS=Pyrobaculum aerophilum (strain ATCC 51768 / IM2 / DSM 7523 / JCM 9630 / NBRC 100827) GN=ileS PE=3 SV=1	K01870	6.1.1.5	Archaea	Unknown	Crenarchaeota	Thermoprotei	Thermoproteales	Thermoproteaceae	Pyrobaculum	Pyrobaculum aerophilum	-	0	0	0	0	0	0	0	0	0	0	0	0	0	0	0	0	0	0	0	0	0	0	1	0	0	0	0	0	0	0	0	0	0	0	0	0	0	0
EF2_PYRAE Elongation factor 2 OS=Pyrobaculum aerophilum (strain ATCC 51768 / IM2 / DSM 7523 / JCM 9630 / NBRC 100827) GN=fusA PE=3 SV=1	K03234	-	Archaea	Unknown	Crenarchaeota	Thermoprotei	Thermoproteales	Thermoproteaceae	Pyrobaculum	Pyrobaculum aerophilum	-	0	0	0	0	0	0	0	0	0	0	0	0	0	0	0	0	0	0	0	0	0	0	0	0	0	0	1	1	0	0	0	0	0	0	0	0	0	0
MG: Superoxide dismutase [Fe] OS=Pyrobaculum aerophilum (strain ATCC 51768 / IM2 / DSM 7523 / JCM 9630 / NBRC 100827) GN=sod PE=1 SV=2 [O93724] Score: 41.2	K04564	1.15.1.1	Archaea	Unknown	Crenarchaeota	Thermoprotei	Thermoproteales	Thermoproteaceae	Pyrobaculum	Pyrobaculum aerophilum	-	0	0	0	0	0	0	0	0	0	0	0	0	0	0	0	0	0	0	0	0	0	0	0	0	0	0	0	0	0	0	0	0	0	0	0	0	0	0
TRPD_PYRAR Anthranilate phosphoribosyltransferase OS=Pyrobaculum arsenaticum (strain DSM 13514 / JCM 11321) GN=trpD PE=3 SV=1	K00766	2.4.2.18	Archaea	Unknown	Crenarchaeota	Thermoprotei	Thermoproteales	Thermoproteaceae	Pyrobaculum	Pyrobaculum arsenaticum	-	0	0	0	0	0	0	1	0	0	0	0	0	0	0	0	0	0	0	0	0	0	0	0	0	0	0	0	0	0	0	0	0	0	0	0	0	0	0
GCH3_PYRAR GTP cyclohydrolase III OS=Pyrobaculum arsenaticum (strain DSM 13514 / JCM 11321) GN=gch3 PE=3 SV=1	K08096	3.5.4.29	Archaea	Unknown	Crenarchaeota	Thermoprotei	Thermoproteales	Thermoproteaceae	Pyrobaculum	Pyrobaculum arsenaticum	-	0	0	0	0	0	0	0	0	0	0	0	1	0	0	0	0	0	0	0	0	0	0	0	0	0	0	0	0	0	0	0	0	0	0	0	0	0	0
ARGB_PYRCJ Acetylglutamate/acetylaminoadipate kinase OS=Pyrobaculum calidifontis (strain JCM 11548 / VA1) GN=argB PE=3 SV=1	K05828	2.7.2.-|2.7.2.8	Archaea	Unknown	Crenarchaeota	Thermoprotei	Thermoproteales	Thermoproteaceae	Pyrobaculum	Pyrobaculum calidifontis	-	0	0	0	0	0	0	0	0	0	0	0	0	0	0	0	0	1	0	0	0	0	0	0	0	0	0	1	0	0	0	0	0	0	0	0	0	0	0
MG: CRISPR-associated exonuclease Cas4 OS=Pyrobaculum calidifontis (strain JCM 11548 / VA1) GN=cas4 PE=1 SV=1 [A3MTK6] Score: 46.6	K07464	3.1.12.1	Archaea	Unknown	Crenarchaeota	Thermoprotei	Thermoproteales	Thermoproteaceae	Pyrobaculum	Pyrobaculum calidifontis	-	0	0	0	0	0	0	0	0	0	0	0	0	0	0	0	0	0	0	0	0	0	0	0	0	0	0	0	0	0	0	0	0	1	0	0	0	0	0
PSB2_PYRCJ Proteasome subunit beta 2 OS=Pyrobaculum calidifontis (strain JCM 11548 / VA1) GN=psmB2 PE=3 SV=1	K03433	3.4.25.1	Archaea	Unknown	Crenarchaeota	Thermoprotei	Thermoproteales	Thermoproteaceae	Pyrobaculum	Pyrobaculum calidifontis	-	0	0	0	0	0	0	0	0	0	0	0	0	0	0	0	0	0	0	0	0	0	0	0	0	0	0	0	0	0	0	0	0	0	0	0	0	0	0
LEUD_PYRCJ 3-isopropylmalate dehydratase small subunit OS=Pyrobaculum calidifontis (strain JCM 11548 / VA1) GN=leuD PE=3 SV=1	K01704	4.2.1.33	Archaea	Unknown	Crenarchaeota	Thermoprotei	Thermoproteales	Thermoproteaceae	Pyrobaculum	Pyrobaculum calidifontis	-	0	0	0	0	0	0	0	0	0	0	0	0	0	0	0	0	0	0	0	0	0	0	0	0	0	0	0	0	0	0	0	0	0	0	0	0	0	0
IF2P_PYRIL Probable translation initiation factor IF-2 OS=Pyrobaculum islandicum (strain DSM 4184 / JCM 9189 / GEO3) GN=infB PE=3 SV=1	K03243	-	Archaea	Unknown	Crenarchaeota	Thermoprotei	Thermoproteales	Thermoproteaceae	Pyrobaculum	Pyrobaculum islandicum	-	0	0	0	0	0	0	0	0	0	0	0	0	0	0	0	1	0	0	0	0	0	0	0	0	0	0	0	0	0	0	0	0	0	0	0	0	0	0
SFSA_PYRNV Sugar fermentation stimulation protein homolog OS=Pyrobaculum neutrophilum (strain DSM 2338 / JCM 9278 / V24Sta) GN=sfsA PE=3 SV=1	K06206	-	Archaea	Unknown	Crenarchaeota	Thermoprotei	Thermoproteales	Thermoproteaceae	Pyrobaculum	Pyrobaculum neutrophilum	-	0	0	0	0	1	1	0	2	1	1	0	1	0	0	0	0	0	0	0	0	1	0	0	0	0	0	0	0	0	0	0	0	0	0	0	1	0	0
MG: UPF0173 metal-dependent hydrolase Pars_0810 OS=Pyrobaculum arsenaticum (strain DSM 13514 / JCM 11321) GN=Pars_0810 PE=3 SV=1 [A4WJ29] Score: 84.3	-	-	Archaea	Unknown	Crenarchaeota	Thermoprotei	Thermoproteales	Thermoproteaceae	Pyrobaculum	Unknown	-	0	0	0	0	0	0	0	0	0	0	0	0	1	0	0	0	0	0	0	0	0	0	0	1	0	0	0	0	0	0	0	0	0	0	0	0	0	0
SRP54_PYRIL Signal recognition particle 54 kDa protein OS=Pyrobaculum islandicum (strain DSM 4184 / JCM 9189 / GEO3) GN=srp54 PE=3 SV=1	K03106	-	Archaea	Unknown	Crenarchaeota	Thermoprotei	Thermoproteales	Thermoproteaceae	Pyrobaculum	Unknown	-	1	0	0	0	0	0	0	0	0	0	0	0	0	0	0	0	0	0	0	0	0	0	0	0	0	0	0	0	0	0	0	0	0	0	0	0	0	0
RRP41_PYRAE Exosome complex component Rrp41 OS=Pyrobaculum aerophilum (strain ATCC 51768 / IM2 / DSM 7523 / JCM 9630 / NBRC 100827) GN=rrp41 PE=3 SV=1	K11600	3.1.13.-	Archaea	Unknown	Crenarchaeota	Thermoprotei	Thermoproteales	Thermoproteaceae	Pyrobaculum	Unknown	-	0	0	0	0	0	0	0	0	0	0	0	0	0	0	0	0	0	0	0	0	0	0	0	0	1	0	0	0	0	0	0	0	0	0	0	0	0	0
MG: DNA ligase OS=Pyrobaculum calidifontis (strain JCM 11548 / VA1) GN=lig PE=3 SV=1 [A3MS62] Score: 536.0	K10747	6.5.1.1	Archaea	Unknown	Crenarchaeota	Thermoprotei	Thermoproteales	Thermoproteaceae	Pyrobaculum	Unknown	-	0	0	0	0	0	0	0	0	0	0	0	0	0	0	0	0	0	0	0	0	0	0	0	0	0	0	0	0	0	0	0	0	0	0	0	0	0	0
MG: Bifunctional trehalose-6-phosphate synthase/phosphatase OS=Thermoproteus tenax (strain ATCC 35583 / NBRC 100435 / JCM 9277 / Kra 1) GN=tpsp PE=1 SV=1 [G4RK44] Score: 410.0	K16055	2.4.1.15|3.1.3.12	Archaea	Unknown	Crenarchaeota	Thermoprotei	Thermoproteales	Thermoproteaceae	Thermoproteus	Thermoproteus tenax	-	0	0	0	0	0	0	0	0	0	1	0	1	0	0	0	0	0	0	0	0	0	0	0	0	0	0	0	0	0	0	0	0	0	0	0	0	0	0
MG: Pyrophosphate--fructose 6-phosphate 1-phosphotransferase OS=Thermoproteus tenax (strain ATCC 35583 / NBRC 100435 / JCM 9277 / Kra 1) GN=pfp PE=1 SV=1 [G4RK16] Score: 212.0	K00850	2.7.1.90	Archaea	Unknown	Crenarchaeota	Thermoprotei	Thermoproteales	Thermoproteaceae	Thermoproteus	Thermoproteus tenax	-	0	0	0	0	0	0	0	0	0	0	0	0	0	0	0	0	0	1	0	0	0	0	0	0	0	0	0	0	0	0	0	0	0	0	0	0	0	0
MTD_ARCFU F420-dependent methylenetetrahydromethanopterin dehydrogenase OS=Archaeoglobus fulgidus (strain ATCC 49558 / VC-16 / DSM 4304 / JCM 9628 / NBRC 100126) GN=mtd PE=1 SV=3	K00319	1.5.98.1	Archaea	Unknown	Euryarchaeota	Archaeoglobi	Archaeoglobales	Archaeoglobaceae	Archaeoglobus	Archaeoglobus fulgidus	-	99	86	5	6	38	45	35	42	34	36	31	41	37	34	33	37	36	40	37	29	1	1	2	3	42	34	33	32	47	24	25	31	20	12	24	21	33	34
MG: Indolepyruvate oxidoreductase subunit IorA OS=Archaeoglobus fulgidus (strain ATCC 49558 / VC-16 / DSM 4304 / JCM 9628 / NBRC 100126) GN=iorA PE=3 SV=1 [O28783] Score: 350.0	K00179	1.2.7.8	Archaea	Unknown	Euryarchaeota	Archaeoglobi	Archaeoglobales	Archaeoglobaceae	Archaeoglobus	Archaeoglobus fulgidus	-	7	5	1	1	17	12	33	29	4	2	5	1	0	0	0	0	0	0	0	2	12	10	8	16	0	0	0	0	0	0	0	0	0	0	4	3	3	0
MG: 2,5-diamino-6-ribosylamino-4(3H)-pyrimidinone 5'-phosphate reductase OS=Archaeoglobus fulgidus (strain ATCC 49558 / VC-16 / DSM 4304 / JCM 9628 / NBRC 100126) GN=AF_2007 PE=3 SV=1 [O28272] Score: 204.0	K14654	1.1.1.302	Archaea	Unknown	Euryarchaeota	Archaeoglobi	Archaeoglobales	Archaeoglobaceae	Archaeoglobus	Archaeoglobus fulgidus	-	2	0	0	0	1	3	1	0	0	0	0	0	0	0	0	0	0	0	0	0	0	0	0	0	0	0	0	0	0	0	0	0	0	0	0	0	0	0
MG: Uncharacterized protein AF_1403 OS=Archaeoglobus fulgidus (strain ATCC 49558 / VC-16 / DSM 4304 / JCM 9628 / NBRC 100126) GN=AF_1403 PE=1 SV=1 [O28869] Score: 225.0	K06862	-	Archaea	Unknown	Euryarchaeota	Archaeoglobi	Archaeoglobales	Archaeoglobaceae	Archaeoglobus	Archaeoglobus fulgidus	-	1	0	0	0	1	0	1	0	0	0	0	0	0	0	0	0	3	6	0	0	0	0	0	0	0	0	1	0	0	0	0	0	0	1	0	0	0	0
MG: Uncharacterized protein AF_1281 OS=Archaeoglobus fulgidus (strain ATCC 49558 / VC-16 / DSM 4304 / JCM 9628 / NBRC 100126) GN=AF_1281 PE=3 SV=1 [O28987] Score: 140.0	K05520	-	Archaea	Unknown	Euryarchaeota	Archaeoglobi	Archaeoglobales	Archaeoglobaceae	Archaeoglobus	Archaeoglobus fulgidus	-	1	1	0	0	1	0	0	0	0	0	0	0	0	0	0	0	0	0	0	0	0	0	0	0	0	0	0	0	1	0	0	0	0	0	0	0	0	0
MG: Protein translocase subunit SecY OS=Archaeoglobus fulgidus (strain ATCC 49558 / VC-16 / DSM 4304 / JCM 9628 / NBRC 100126) GN=secY PE=3 SV=1 [O28377] Score: 491.0	K03076	-	Archaea	Unknown	Euryarchaeota	Archaeoglobi	Archaeoglobales	Archaeoglobaceae	Archaeoglobus	Archaeoglobus fulgidus	-	1	1	0	0	0	0	0	0	0	0	0	0	0	0	0	0	0	0	0	0	0	0	0	0	0	0	0	0	0	0	0	0	0	0	0	0	0	0
MG: Desulfoferrodoxin homolog OS=Archaeoglobus fulgidus (strain ATCC 49558 / VC-16 / DSM 4304 / JCM 9628 / NBRC 100126) GN=AF_0833 PE=3 SV=1 [O29425] Score: 143.0	-	-	Archaea	Unknown	Euryarchaeota	Archaeoglobi	Archaeoglobales	Archaeoglobaceae	Archaeoglobus	Archaeoglobus fulgidus	-	1	0	2	4	0	0	0	0	0	0	0	0	0	0	0	0	0	0	0	0	0	0	0	0	0	0	0	0	0	0	0	0	0	0	0	0	0	0
MG: Iron-sulfur cluster assembly scaffold protein IscU 1 OS=Archaeoglobus fulgidus (strain ATCC 49558 / VC-16 / DSM 4304 / JCM 9628 / NBRC 100126) GN=iscU1 PE=3 SV=1 [P0DMG1] Score: 164.0	K04488	-	Archaea	Unknown	Euryarchaeota	Archaeoglobi	Archaeoglobales	Archaeoglobaceae	Archaeoglobus	Archaeoglobus fulgidus	-	7	0	0	0	0	0	2	0	0	0	0	0	0	0	0	0	2	0	0	0	3	0	0	0	0	0	0	0	0	0	0	0	2	0	0	0	0	0
MG: Diaminopimelate decarboxylase OS=Archaeoglobus fulgidus (strain ATCC 49558 / VC-16 / DSM 4304 / JCM 9628 / NBRC 100126) GN=lysA PE=3 SV=1 [O29458] Score: 421.0	K01586	4.1.1.20	Archaea	Unknown	Euryarchaeota	Archaeoglobi	Archaeoglobales	Archaeoglobaceae	Archaeoglobus	Archaeoglobus fulgidus	-	1	1	0	0	0	0	0	0	0	0	0	0	0	2	0	0	0	0	0	0	0	0	0	0	0	0	0	0	0	0	0	0	0	0	0	0	0	0
MG: Uncharacterized protein AF_1199 OS=Archaeoglobus fulgidus (strain ATCC 49558 / VC-16 / DSM 4304 / JCM 9628 / NBRC 100126) GN=AF_1199 PE=3 SV=1 [O29069] Score: 200.0	K01039	-	Archaea	Unknown	Euryarchaeota	Archaeoglobi	Archaeoglobales	Archaeoglobaceae	Archaeoglobus	Archaeoglobus fulgidus	-	1	1	0	0	11	9	102	74	18	33	9	9	0	0	0	0	0	0	0	0	27	17	18	52	0	0	5	3	44	24	23	22	0	0	0	0	0	0
MG: Probable flagellin 1 OS=Archaeoglobus fulgidus (strain ATCC 49558 / VC-16 / DSM 4304 / JCM 9628 / NBRC 100126) GN=flaB1 PE=3 SV=1 [O29208] Score: 131.0	K07325	-	Archaea	Unknown	Euryarchaeota	Archaeoglobi	Archaeoglobales	Archaeoglobaceae	Archaeoglobus	Archaeoglobus fulgidus	-	111	102	72	22	50	48	41	35	79	61	62	46	68	105	98	95	75	104	147	115	7	7	8	9	112	58	120	91	28	22	40	39	26	30	45	40	23	40
MG: Uncharacterized protein AF_1096 OS=Archaeoglobus fulgidus (strain ATCC 49558 / VC-16 / DSM 4304 / JCM 9628 / NBRC 100126) GN=AF_1096 PE=4 SV=1 [O29169] Score: 63.2	-	-	Archaea	Unknown	Euryarchaeota	Archaeoglobi	Archaeoglobales	Archaeoglobaceae	Archaeoglobus	Archaeoglobus fulgidus	-	5	2	0	0	0	0	0	1	0	0	0	0	2	0	0	0	0	0	0	0	0	0	13	16	0	0	0	0	3	1	0	2	0	0	7	2	0	0
MG: Uncharacterized protein AF_2201 OS=Archaeoglobus fulgidus (strain ATCC 49558 / VC-16 / DSM 4304 / JCM 9628 / NBRC 100126) GN=AF_2201 PE=4 SV=1 [O28082] Score: 151.0	-	-	Archaea	Unknown	Euryarchaeota	Archaeoglobi	Archaeoglobales	Archaeoglobaceae	Archaeoglobus	Archaeoglobus fulgidus	-	6	4	0	0	11	2	4	12	25	15	8	6	25	36	32	21	59	27	12	23	0	0	0	0	15	9	1	5	0	0	0	0	0	0	3	0	2	1
MG: Uncharacterized protein AF_0456 OS=Archaeoglobus fulgidus (strain ATCC 49558 / VC-16 / DSM 4304 / JCM 9628 / NBRC 100126) GN=AF_0456 PE=3 SV=1 [O29793] Score: 52.4	-	-	Archaea	Unknown	Euryarchaeota	Archaeoglobi	Archaeoglobales	Archaeoglobaceae	Archaeoglobus	Archaeoglobus fulgidus	-	0	1	1	0	2	2	0	6	2	2	1	0	0	0	0	0	0	0	0	0	3	3	0	4	3	0	2	2	0	0	0	0	0	0	0	0	0	0
MG: UPF0248 protein AF_0420 OS=Archaeoglobus fulgidus (strain ATCC 49558 / VC-16 / DSM 4304 / JCM 9628 / NBRC 100126) GN=AF_0420 PE=3 SV=1 [O29827] Score: 53.5	K09715	-	Archaea	Unknown	Euryarchaeota	Archaeoglobi	Archaeoglobales	Archaeoglobaceae	Archaeoglobus	Archaeoglobus fulgidus	-	0	1	0	0	0	0	0	0	0	0	0	0	0	0	0	0	0	0	0	0	0	0	0	0	0	0	0	0	0	0	0	0	0	0	0	0	0	0
NFI_ARCFU Endonuclease V OS=Archaeoglobus fulgidus (strain ATCC 49558 / VC-16 / DSM 4304 / JCM 9628 / NBRC 100126) GN=nfi PE=1 SV=1	K05982	3.1.21.7	Archaea	Unknown	Euryarchaeota	Archaeoglobi	Archaeoglobales	Archaeoglobaceae	Archaeoglobus	Archaeoglobus fulgidus	-	0	0	1	0	0	0	0	0	0	0	0	0	0	0	0	0	0	0	0	0	0	0	0	0	0	0	0	0	0	0	0	0	0	0	0	0	0	0
MG: Acetate--CoA ligase [ADP-forming] I OS=Archaeoglobus fulgidus (strain ATCC 49558 / VC-16 / DSM 4304 / JCM 9628 / NBRC 100126) GN=AF_1211 PE=1 SV=1 [O29057] Score: 451.0	K09181	6.2.1.13	Archaea	Unknown	Euryarchaeota	Archaeoglobi	Archaeoglobales	Archaeoglobaceae	Archaeoglobus	Archaeoglobus fulgidus	-	0	0	1	0	5	3	4	7	0	0	0	2	0	0	0	0	0	0	0	0	4	2	0	4	0	0	0	1	0	1	0	0	0	0	0	0	0	0
SAT_ARCFU Sulfate adenylyltransferase OS=Archaeoglobus fulgidus (strain ATCC 49558 / VC-16 / DSM 4304 / JCM 9628 / NBRC 100126) GN=sat PE=3 SV=2	K00958	2.7.7.4	Archaea	Unknown	Euryarchaeota	Archaeoglobi	Archaeoglobales	Archaeoglobaceae	Archaeoglobus	Archaeoglobus fulgidus	-	0	0	0	1	0	0	0	0	0	0	0	0	0	0	0	0	0	0	0	0	0	0	0	0	0	0	0	0	0	0	0	0	0	0	0	0	0	0
MG: Phosphoribosyl-AMP cyclohydrolase OS=Archaeoglobus fulgidus (strain ATCC 49558 / VC-16 / DSM 4304 / JCM 9628 / NBRC 100126) GN=hisI PE=3 SV=1 [O28329] Score: 142.0	K01496	3.5.4.19	Archaea	Unknown	Euryarchaeota	Archaeoglobi	Archaeoglobales	Archaeoglobaceae	Archaeoglobus	Archaeoglobus fulgidus	-	0	0	0	0	1	0	0	0	0	0	0	1	0	0	0	0	0	1	0	0	0	0	0	0	0	0	0	0	0	0	0	0	0	0	1	0	0	0
MG: Uncharacterized protein AF_2204 OS=Archaeoglobus fulgidus (strain ATCC 49558 / VC-16 / DSM 4304 / JCM 9628 / NBRC 100126) GN=AF_2204 PE=3 SV=1 [O28079] Score: 52.8	K06871	-	Archaea	Unknown	Euryarchaeota	Archaeoglobi	Archaeoglobales	Archaeoglobaceae	Archaeoglobus	Archaeoglobus fulgidus	-	0	0	0	0	2	2	0	0	0	0	0	0	0	0	0	0	0	0	0	0	1	0	0	0	0	0	0	0	0	0	0	0	0	0	0	0	0	0
MG: Methionine aminopeptidase OS=Archaeoglobus fulgidus (strain ATCC 49558 / VC-16 / DSM 4304 / JCM 9628 / NBRC 100126) GN=map PE=3 SV=1 [O28438] Score: 281.0	K01265	3.4.11.18	Archaea	Unknown	Euryarchaeota	Archaeoglobi	Archaeoglobales	Archaeoglobaceae	Archaeoglobus	Archaeoglobus fulgidus	-	0	0	0	0	4	0	4	4	4	1	0	0	0	0	0	0	0	0	0	0	0	0	0	0	0	0	0	0	0	0	0	0	0	0	0	0	0	0
MG: Uncharacterized protein AF_1724 OS=Archaeoglobus fulgidus (strain ATCC 49558 / VC-16 / DSM 4304 / JCM 9628 / NBRC 100126) GN=AF_1724 PE=3 SV=1 [O28550] Score: 70.1	-	3.2.2.-	Archaea	Unknown	Euryarchaeota	Archaeoglobi	Archaeoglobales	Archaeoglobaceae	Archaeoglobus	Archaeoglobus fulgidus	-	0	0	0	0	1	3	1	0	2	0	0	0	0	0	0	0	0	0	0	0	0	0	0	0	0	0	0	0	0	0	0	0	0	0	0	0	0	0
MG: Cobalamin biosynthesis protein CbiHC OS=Archaeoglobus fulgidus (strain ATCC 49558 / VC-16 / DSM 4304 / JCM 9628 / NBRC 100126) GN=cbiHC PE=3 SV=1 [O29534] Score: 226.0	K05934	2.1.1.-|5.4.99.60	Archaea	Unknown	Euryarchaeota	Archaeoglobi	Archaeoglobales	Archaeoglobaceae	Archaeoglobus	Archaeoglobus fulgidus	-	0	0	0	0	6	1	3	3	0	0	0	2	0	0	0	0	0	0	0	0	0	0	0	0	0	0	0	0	0	0	0	0	0	0	0	0	0	0
MG: UPF0111 protein AF_1799 OS=Archaeoglobus fulgidus (strain ATCC 49558 / VC-16 / DSM 4304 / JCM 9628 / NBRC 100126) GN=AF_1799 PE=3 SV=2 [O28475] Score: 140.0	K07220	-	Archaea	Unknown	Euryarchaeota	Archaeoglobi	Archaeoglobales	Archaeoglobaceae	Archaeoglobus	Archaeoglobus fulgidus	-	0	0	0	0	4	2	4	2	3	3	0	0	0	0	0	0	0	0	0	0	0	0	0	0	0	0	0	0	0	0	0	0	0	0	0	0	0	0
MG: UPF0173 metal-dependent hydrolase AF_1265 OS=Archaeoglobus fulgidus (strain ATCC 49558 / VC-16 / DSM 4304 / JCM 9628 / NBRC 100126) GN=AF_1265 PE=3 SV=1 [O29003] Score: 122.0	-	-	Archaea	Unknown	Euryarchaeota	Archaeoglobi	Archaeoglobales	Archaeoglobaceae	Archaeoglobus	Archaeoglobus fulgidus	-	0	0	0	0	1	0	0	1	0	0	0	0	0	0	0	0	0	0	0	0	0	0	0	0	0	0	0	0	0	0	0	0	0	0	0	0	0	0
MG: Iron-sulfur flavoprotein AF_1519 OS=Archaeoglobus fulgidus (strain ATCC 49558 / VC-16 / DSM 4304 / JCM 9628 / NBRC 100126) GN=AF_1519 PE=3 SV=1 [O28753] Score: 99.4	-	-	Archaea	Unknown	Euryarchaeota	Archaeoglobi	Archaeoglobales	Archaeoglobaceae	Archaeoglobus	Archaeoglobus fulgidus	-	0	0	0	0	2	4	3	0	2	2	0	0	0	0	0	0	0	0	0	0	0	0	0	0	0	0	0	0	0	0	0	0	0	0	0	0	0	0
MG: Beta-ribofuranosylaminobenzene 5'-phosphate synthase OS=Archaeoglobus fulgidus (strain ATCC 49558 / VC-16 / DSM 4304 / JCM 9628 / NBRC 100126) GN=AF_2089 PE=1 SV=1 [O28190] Score: 278.0	K06984	2.4.2.54	Archaea	Unknown	Euryarchaeota	Archaeoglobi	Archaeoglobales	Archaeoglobaceae	Archaeoglobus	Archaeoglobus fulgidus	-	0	0	0	0	1	0	0	0	0	0	0	0	0	0	0	0	0	0	0	0	0	0	0	0	0	0	0	0	0	0	0	1	0	0	0	0	0	0
MG: 2,3-bisphosphoglycerate-independent phosphoglycerate mutase 2 OS=Archaeoglobus fulgidus (strain ATCC 49558 / VC-16 / DSM 4304 / JCM 9628 / NBRC 100126) GN=apgM2 PE=3 SV=1 [O28847] Score: 55.8	K15635	5.4.2.12	Archaea	Unknown	Euryarchaeota	Archaeoglobi	Archaeoglobales	Archaeoglobaceae	Archaeoglobus	Archaeoglobus fulgidus	-	0	0	0	0	1	0	0	0	0	0	0	0	0	0	0	0	0	0	0	0	0	0	0	0	0	0	0	0	0	0	0	0	0	0	0	0	0	0
MG: Delta-aminolevulinic acid dehydratase OS=Archaeoglobus fulgidus (strain ATCC 49558 / VC-16 / DSM 4304 / JCM 9628 / NBRC 100126) GN=hemB PE=3 SV=1 [O28305] Score: 402.0	K01698	4.2.1.24	Archaea	Unknown	Euryarchaeota	Archaeoglobi	Archaeoglobales	Archaeoglobaceae	Archaeoglobus	Archaeoglobus fulgidus	-	0	0	0	0	0	0	13	8	1	0	0	0	0	0	0	0	0	0	0	0	0	3	0	0	0	0	0	0	0	0	0	0	0	0	0	0	0	0
RUXX_ARCFU Putative snRNP Sm-like protein OS=Archaeoglobus fulgidus (strain ATCC 49558 / VC-16 / DSM 4304 / JCM 9628 / NBRC 100126) GN=AF_0875 PE=1 SV=1	K04796	-	Archaea	Unknown	Euryarchaeota	Archaeoglobi	Archaeoglobales	Archaeoglobaceae	Archaeoglobus	Archaeoglobus fulgidus	-	0	0	0	0	0	0	1	0	0	0	0	0	0	0	0	0	0	0	0	0	0	0	0	0	0	0	0	0	0	0	0	0	0	0	0	0	0	0
MG: DNA double-strand break repair Rad50 ATPase OS=Archaeoglobus fulgidus (strain ATCC 49558 / VC-16 / DSM 4304 / JCM 9628 / NBRC 100126) GN=rad50 PE=3 SV=1 [O29230] Score: 52.8	K03546	-	Archaea	Unknown	Euryarchaeota	Archaeoglobi	Archaeoglobales	Archaeoglobaceae	Archaeoglobus	Archaeoglobus fulgidus	-	0	0	0	0	0	0	1	0	0	0	0	0	0	0	0	0	0	0	0	0	0	0	0	0	0	0	0	0	0	0	0	0	0	0	0	0	0	0
MG: Putative fused nickel transport protein NikMN OS=Archaeoglobus fulgidus (strain ATCC 49558 / VC-16 / DSM 4304 / JCM 9628 / NBRC 100126) GN=AF_1843 PE=3 SV=2 [O28435] Score: 113.0	K02007	-	Archaea	Unknown	Euryarchaeota	Archaeoglobi	Archaeoglobales	Archaeoglobaceae	Archaeoglobus	Archaeoglobus fulgidus	-	0	0	0	0	0	0	1	0	0	0	0	0	0	0	0	0	0	0	0	0	0	0	0	0	0	0	0	0	0	0	0	0	0	0	0	0	0	0
MG: Uncharacterized protein AF_2225 OS=Archaeoglobus fulgidus (strain ATCC 49558 / VC-16 / DSM 4304 / JCM 9628 / NBRC 100126) GN=AF_2225 PE=3 SV=1 [O28058] Score: 219.0	-	-	Archaea	Unknown	Euryarchaeota	Archaeoglobi	Archaeoglobales	Archaeoglobaceae	Archaeoglobus	Archaeoglobus fulgidus	-	0	0	0	0	0	0	0	1	1	0	0	0	0	0	0	0	0	0	0	0	0	0	0	0	0	0	0	0	0	0	0	0	0	0	0	0	0	0
MG: Probable branched-chain amino acid transport ATP-binding protein LivG OS=Archaeoglobus fulgidus (strain ATCC 49558 / VC-16 / DSM 4304 / JCM 9628 / NBRC 100126) GN=livG PE=3 SV=2 [O28881] Score: 88.6	K01995	-	Archaea	Unknown	Euryarchaeota	Archaeoglobi	Archaeoglobales	Archaeoglobaceae	Archaeoglobus	Archaeoglobus fulgidus	-	0	0	0	0	0	0	0	1	0	0	0	0	0	0	0	0	0	0	0	0	0	0	0	0	0	0	0	0	0	0	0	0	0	0	0	0	0	0
NADK_ARCFU NAD kinase OS=Archaeoglobus fulgidus (strain ATCC 49558 / VC-16 / DSM 4304 / JCM 9628 / NBRC 100126) GN=nadK PE=1 SV=1	K00858	2.7.1.23	Archaea	Unknown	Euryarchaeota	Archaeoglobi	Archaeoglobales	Archaeoglobaceae	Archaeoglobus	Archaeoglobus fulgidus	-	0	0	0	0	0	0	0	1	0	0	0	0	0	0	0	0	0	0	0	0	0	0	0	0	0	0	0	0	0	0	0	0	0	0	0	0	0	0
MG: Probable copper-exporting P-type ATPase A OS=Archaeoglobus fulgidus (strain ATCC 49558 / VC-16 / DSM 4304 / JCM 9628 / NBRC 100126) GN=copA PE=1 SV=1 [O29777] Score: 43.5	K17686	3.6.3.54	Archaea	Unknown	Euryarchaeota	Archaeoglobi	Archaeoglobales	Archaeoglobaceae	Archaeoglobus	Archaeoglobus fulgidus	-	0	0	0	0	0	0	0	1	0	0	0	0	0	0	0	0	0	0	0	0	0	0	0	0	0	0	0	0	0	0	0	0	0	0	0	0	0	0
MG: CRISPR system Cmr subunit Cmr5 OS=Archaeoglobus fulgidus (strain ATCC 49558 / VC-16 / DSM 4304 / JCM 9628 / NBRC 100126) GN=cmr5 PE=1 SV=1 [O28417] Score: 58.5	K19141	-	Archaea	Unknown	Euryarchaeota	Archaeoglobi	Archaeoglobales	Archaeoglobaceae	Archaeoglobus	Archaeoglobus fulgidus	-	0	0	0	0	0	0	0	0	4	7	4	3	0	0	0	0	0	0	0	0	0	0	0	0	0	0	0	0	0	0	0	0	0	0	0	0	0	0
MG: Uncharacterized protein AF_1598 OS=Archaeoglobus fulgidus (strain ATCC 49558 / VC-16 / DSM 4304 / JCM 9628 / NBRC 100126) GN=AF_1598 PE=4 SV=1 [O28674] Score: 42.0	-	-	Archaea	Unknown	Euryarchaeota	Archaeoglobi	Archaeoglobales	Archaeoglobaceae	Archaeoglobus	Archaeoglobus fulgidus	-	0	0	0	0	0	0	0	0	6	7	0	1	0	0	0	0	0	0	0	0	0	0	0	0	0	0	0	0	0	0	0	0	0	0	0	0	0	0
MG: Uncharacterized protein AF_1126 OS=Archaeoglobus fulgidus (strain ATCC 49558 / VC-16 / DSM 4304 / JCM 9628 / NBRC 100126) GN=AF_1126 PE=4 SV=1 [O29139] Score: 105.0	K06966	-	Archaea	Unknown	Euryarchaeota	Archaeoglobi	Archaeoglobales	Archaeoglobaceae	Archaeoglobus	Archaeoglobus fulgidus	-	0	0	0	0	0	0	0	0	0	0	1	0	0	1	0	0	7	3	0	0	0	0	0	1	0	0	0	0	0	0	0	0	0	0	0	0	0	0
MG: DNA polymerase OS=Archaeoglobus fulgidus (strain ATCC 49558 / VC-16 / DSM 4304 / JCM 9628 / NBRC 100126) GN=pol PE=3 SV=1 [O29753] Score: 101.0	K02319	2.7.7.7	Archaea	Unknown	Euryarchaeota	Archaeoglobi	Archaeoglobales	Archaeoglobaceae	Archaeoglobus	Archaeoglobus fulgidus	-	0	0	0	0	0	0	0	0	0	0	1	0	0	0	0	0	0	0	0	0	0	0	0	0	0	0	0	0	0	0	0	0	0	0	0	0	0	0
MG: UPF0148 protein AF_2370 OS=Archaeoglobus fulgidus (strain ATCC 49558 / VC-16 / DSM 4304 / JCM 9628 / NBRC 100126) GN=AF_2370 PE=3 SV=2 [O30300] Score: 53.5	K07143	-	Archaea	Unknown	Euryarchaeota	Archaeoglobi	Archaeoglobales	Archaeoglobaceae	Archaeoglobus	Archaeoglobus fulgidus	-	0	0	0	0	0	0	0	0	0	0	0	0	1	3	6	1	3	3	0	2	0	0	0	0	0	0	0	0	1	0	0	0	0	0	0	0	0	0
MG: UPF0331 protein AF_2433 OS=Archaeoglobus fulgidus (strain ATCC 49558 / VC-16 / DSM 4304 / JCM 9628 / NBRC 100126) GN=AF_2433 PE=3 SV=1 [O30238] Score: 43.5	-	-	Archaea	Unknown	Euryarchaeota	Archaeoglobi	Archaeoglobales	Archaeoglobaceae	Archaeoglobus	Archaeoglobus fulgidus	-	0	0	0	0	0	0	0	0	0	0	0	0	9	8	11	9	12	8	0	6	0	0	0	0	0	0	0	0	0	0	0	0	0	0	0	0	0	0
VATC_ARCFU V-type ATP synthase subunit C OS=Archaeoglobus fulgidus (strain ATCC 49558 / VC-16 / DSM 4304 / JCM 9628 / NBRC 100126) GN=atpC PE=3 SV=1	K02119	-	Archaea	Unknown	Euryarchaeota	Archaeoglobi	Archaeoglobales	Archaeoglobaceae	Archaeoglobus	Archaeoglobus fulgidus	-	0	0	0	0	0	0	0	0	0	0	0	0	1	0	0	0	0	0	0	0	0	0	0	0	0	0	0	0	0	0	0	0	0	0	0	0	0	0
MG: Uncharacterized protein AF_1218 OS=Archaeoglobus fulgidus (strain ATCC 49558 / VC-16 / DSM 4304 / JCM 9628 / NBRC 100126) GN=AF_1218 PE=4 SV=1 [O29050] Score: 42.7	-	-	Archaea	Unknown	Euryarchaeota	Archaeoglobi	Archaeoglobales	Archaeoglobaceae	Archaeoglobus	Archaeoglobus fulgidus	-	0	0	0	0	0	0	0	0	0	0	0	0	1	0	0	0	0	0	0	0	0	0	0	0	0	0	0	0	0	0	0	0	0	0	0	0	0	0
MG: Uncharacterized protein AF_1786 OS=Archaeoglobus fulgidus (strain ATCC 49558 / VC-16 / DSM 4304 / JCM 9628 / NBRC 100126) GN=AF_1786 PE=3 SV=1 [O28488] Score: 103.0	-	-	Archaea	Unknown	Euryarchaeota	Archaeoglobi	Archaeoglobales	Archaeoglobaceae	Archaeoglobus	Archaeoglobus fulgidus	-	0	0	0	0	0	0	0	0	0	0	0	0	1	0	0	0	1	0	0	0	0	0	0	0	0	0	0	0	0	0	0	0	0	0	0	0	0	0
MG: Uncharacterized protein AF_0569 OS=Archaeoglobus fulgidus (strain ATCC 49558 / VC-16 / DSM 4304 / JCM 9628 / NBRC 100126) GN=AF_0569 PE=4 SV=1 [O19199] Score: 44.3	-	-	Archaea	Unknown	Euryarchaeota	Archaeoglobi	Archaeoglobales	Archaeoglobaceae	Archaeoglobus	Archaeoglobus fulgidus	-	0	0	0	0	0	0	0	0	0	0	0	0	0	0	2	0	0	0	0	0	0	0	0	0	0	0	0	0	0	0	0	0	0	0	0	0	0	0
MG: UPF0104 membrane protein AF_2231 OS=Archaeoglobus fulgidus (strain ATCC 49558 / VC-16 / DSM 4304 / JCM 9628 / NBRC 100126) GN=AF_2231 PE=3 SV=1 [O28052] Score: 122.0	K07027	-	Archaea	Unknown	Euryarchaeota	Archaeoglobi	Archaeoglobales	Archaeoglobaceae	Archaeoglobus	Archaeoglobus fulgidus	-	0	0	0	0	0	0	0	0	0	0	0	0	0	0	1	0	0	0	0	0	1	0	0	0	0	0	0	0	0	0	0	0	0	0	0	0	2	0
RPOA2_ARCFU DNA-directed RNA polymerase subunit A'' OS=Archaeoglobus fulgidus (strain ATCC 49558 / VC-16 / DSM 4304 / JCM 9628 / NBRC 100126) GN=rpoA2 PE=3 SV=1	K03042	2.7.7.6	Archaea	Unknown	Euryarchaeota	Archaeoglobi	Archaeoglobales	Archaeoglobaceae	Archaeoglobus	Archaeoglobus fulgidus	-	0	0	0	0	0	0	0	0	0	0	0	0	0	0	1	0	0	0	0	1	0	0	0	0	0	0	0	0	0	0	0	0	0	0	0	0	0	0
RS3_ARCFU 30S ribosomal protein S3 OS=Archaeoglobus fulgidus (strain ATCC 49558 / VC-16 / DSM 4304 / JCM 9628 / NBRC 100126) GN=rps3 PE=3 SV=1	K02982	-	Archaea	Unknown	Euryarchaeota	Archaeoglobi	Archaeoglobales	Archaeoglobaceae	Archaeoglobus	Archaeoglobus fulgidus	-	0	0	0	0	0	0	0	0	0	0	0	0	0	0	0	1	0	0	0	0	0	0	0	0	0	0	0	0	0	0	0	0	0	0	0	0	0	0
MG: UPF0051 protein AF_2365 OS=Archaeoglobus fulgidus (strain ATCC 49558 / VC-16 / DSM 4304 / JCM 9628 / NBRC 100126) GN=AF_2365 PE=3 SV=1 [O30305] Score: 88.6	K07033	-	Archaea	Unknown	Euryarchaeota	Archaeoglobi	Archaeoglobales	Archaeoglobaceae	Archaeoglobus	Archaeoglobus fulgidus	-	0	0	0	0	0	0	0	0	0	0	0	0	0	0	0	1	0	0	0	0	0	0	0	0	0	0	0	0	0	0	0	0	0	0	0	0	0	0
MG: DNA topoisomerase 1 OS=Archaeoglobus fulgidus (strain ATCC 49558 / VC-16 / DSM 4304 / JCM 9628 / NBRC 100126) GN=topA PE=3 SV=1 [O28469] Score: 296.0	K03168	5.99.1.2	Archaea	Unknown	Euryarchaeota	Archaeoglobi	Archaeoglobales	Archaeoglobaceae	Archaeoglobus	Archaeoglobus fulgidus	-	0	0	0	0	0	0	0	0	0	0	0	0	0	0	0	1	0	0	0	0	0	0	0	0	0	0	0	0	0	0	0	0	0	0	0	0	0	2
MG: Uncharacterized protein AF_1856 OS=Archaeoglobus fulgidus (strain ATCC 49558 / VC-16 / DSM 4304 / JCM 9628 / NBRC 100126) GN=AF_1856 PE=4 SV=1 [O28422] Score: 203.0	-	-	Archaea	Unknown	Euryarchaeota	Archaeoglobi	Archaeoglobales	Archaeoglobaceae	Archaeoglobus	Archaeoglobus fulgidus	-	0	0	0	0	0	0	0	0	0	0	0	0	0	0	0	0	1	1	0	0	0	0	0	0	0	0	0	0	0	0	0	0	0	0	6	0	0	0
DUT_ARCFU Probable deoxyuridine 5'-triphosphate nucleotidohydrolase OS=Archaeoglobus fulgidus (strain ATCC 49558 / VC-16 / DSM 4304 / JCM 9628 / NBRC 100126) GN=dut PE=3 SV=1	K01520	3.6.1.23	Archaea	Unknown	Euryarchaeota	Archaeoglobi	Archaeoglobales	Archaeoglobaceae	Archaeoglobus	Archaeoglobus fulgidus	-	0	0	0	0	0	0	0	0	0	0	0	0	0	0	0	0	0	1	0	0	0	0	0	0	0	0	0	0	0	0	0	0	0	0	0	0	0	0
MG: Ferric-chelate reductase (NAD(P)H) OS=Archaeoglobus fulgidus (strain ATCC 49558 / VC-16 / DSM 4304 / JCM 9628 / NBRC 100126) GN=feR PE=1 SV=1 [O29428] Score: 147.0	K18915	1.16.1.10	Archaea	Unknown	Euryarchaeota	Archaeoglobi	Archaeoglobales	Archaeoglobaceae	Archaeoglobus	Archaeoglobus fulgidus	-	0	0	0	0	0	0	0	0	0	0	0	0	0	0	0	0	0	1	0	0	0	0	0	0	0	0	0	0	0	0	0	0	0	0	0	0	0	0
PYRF_ARCFU Orotidine 5'-phosphate decarboxylase OS=Archaeoglobus fulgidus (strain ATCC 49558 / VC-16 / DSM 4304 / JCM 9628 / NBRC 100126) GN=pyrF PE=1 SV=2	K01591	4.1.1.23	Archaea	Unknown	Euryarchaeota	Archaeoglobi	Archaeoglobales	Archaeoglobaceae	Archaeoglobus	Archaeoglobus fulgidus	-	0	0	0	0	0	0	0	0	0	0	0	0	0	0	0	0	0	1	0	0	0	0	0	0	0	0	0	0	0	0	0	0	0	0	0	0	0	0
MG: Uncharacterized protein AF_0243 OS=Archaeoglobus fulgidus (strain ATCC 49558 / VC-16 / DSM 4304 / JCM 9628 / NBRC 100126) GN=AF_0243 PE=4 SV=1 [O29996] Score: 273.0	-	-	Archaea	Unknown	Euryarchaeota	Archaeoglobi	Archaeoglobales	Archaeoglobaceae	Archaeoglobus	Archaeoglobus fulgidus	-	0	0	0	0	0	0	0	0	0	0	0	0	0	0	0	0	0	1	0	0	0	0	0	0	0	0	0	0	0	0	0	0	0	0	0	0	1	0
TRPG_ARCFU Anthranilate synthase component 2 OS=Archaeoglobus fulgidus (strain ATCC 49558 / VC-16 / DSM 4304 / JCM 9628 / NBRC 100126) GN=trpG PE=3 SV=1	K01658	4.1.3.27	Archaea	Unknown	Euryarchaeota	Archaeoglobi	Archaeoglobales	Archaeoglobaceae	Archaeoglobus	Archaeoglobus fulgidus	-	0	0	0	0	0	0	0	0	0	0	0	0	0	0	0	0	0	0	1	0	0	0	0	0	0	0	0	0	0	0	0	0	0	0	0	0	0	0
MG: Iron-sulfur flavoprotein AF_1896 OS=Archaeoglobus fulgidus (strain ATCC 49558 / VC-16 / DSM 4304 / JCM 9628 / NBRC 100126) GN=AF_1896 PE=1 SV=1 [O28383] Score: 68.2	-	-	Archaea	Unknown	Euryarchaeota	Archaeoglobi	Archaeoglobales	Archaeoglobaceae	Archaeoglobus	Archaeoglobus fulgidus	-	0	0	0	0	0	0	0	0	0	0	0	0	0	0	0	0	0	0	0	1	0	0	0	0	0	0	0	0	0	0	0	0	0	0	0	0	0	0
MG: Uncharacterized transporter AF_1552 OS=Archaeoglobus fulgidus (strain ATCC 49558 / VC-16 / DSM 4304 / JCM 9628 / NBRC 100126) GN=AF_1552 PE=3 SV=1 [O28720] Score: 91.3	-	-	Archaea	Unknown	Euryarchaeota	Archaeoglobi	Archaeoglobales	Archaeoglobaceae	Archaeoglobus	Archaeoglobus fulgidus	-	0	0	0	0	0	0	0	0	0	0	0	0	0	0	0	0	0	0	0	0	0	0	0	0	0	1	0	0	0	0	0	0	0	0	0	0	0	0
MG: Uncharacterized MscS family protein AF_1546 OS=Archaeoglobus fulgidus (strain ATCC 49558 / VC-16 / DSM 4304 / JCM 9628 / NBRC 100126) GN=AF_1546 PE=3 SV=1 [O28726] Score: 295.0	-	-	Archaea	Unknown	Euryarchaeota	Archaeoglobi	Archaeoglobales	Archaeoglobaceae	Archaeoglobus	Archaeoglobus fulgidus	-	0	0	0	0	0	0	0	0	0	0	0	0	0	0	0	0	0	0	0	0	0	0	0	0	0	1	0	0	0	0	0	0	0	0	0	0	0	0
MG: Molybdate/tungstate import ATP-binding protein WtpC OS=Archaeoglobus fulgidus (strain ATCC 49558 / VC-16 / DSM 4304 / JCM 9628 / NBRC 100126) GN=wtpC PE=1 SV=1 [O30144] Score: 164.0	K15497	3.6.3.-	Archaea	Unknown	Euryarchaeota	Archaeoglobi	Archaeoglobales	Archaeoglobaceae	Archaeoglobus	Archaeoglobus fulgidus	-	0	0	0	0	0	0	0	0	0	0	0	0	0	0	0	0	0	0	0	0	0	0	0	0	0	0	1	0	0	0	0	0	0	0	0	1	0	0
MG: UPF0047 protein AF_2050 OS=Archaeoglobus fulgidus (strain ATCC 49558 / VC-16 / DSM 4304 / JCM 9628 / NBRC 100126) GN=AF_2050 PE=3 SV=1 [O28229] Score: 73.2	-	-	Archaea	Unknown	Euryarchaeota	Archaeoglobi	Archaeoglobales	Archaeoglobaceae	Archaeoglobus	Archaeoglobus fulgidus	-	0	0	0	0	0	0	0	0	0	0	0	0	0	0	0	0	0	0	0	0	0	0	0	0	0	0	0	0	1	1	0	0	0	0	0	0	0	0
MG: Uncharacterized protein AF_1625 OS=Archaeoglobus fulgidus (strain ATCC 49558 / VC-16 / DSM 4304 / JCM 9628 / NBRC 100126) GN=AF_1625 PE=3 SV=1 [O28648] Score: 53.1	-	-	Archaea	Unknown	Euryarchaeota	Archaeoglobi	Archaeoglobales	Archaeoglobaceae	Archaeoglobus	Archaeoglobus fulgidus	-	0	0	0	0	0	0	0	0	0	0	0	0	0	0	0	0	0	0	0	0	0	0	0	0	0	0	0	0	0	0	1	1	0	0	0	0	0	0
MG: Piwi protein AF_1318 OS=Archaeoglobus fulgidus (strain ATCC 49558 / VC-16 / DSM 4304 / JCM 9628 / NBRC 100126) GN=AF_1318 PE=1 SV=1 [O28951] Score: 82.0	K07578	-	Archaea	Unknown	Euryarchaeota	Archaeoglobi	Archaeoglobales	Archaeoglobaceae	Archaeoglobus	Archaeoglobus fulgidus	-	0	0	0	0	0	0	0	0	0	0	0	0	0	0	0	0	0	0	0	0	0	0	0	0	0	0	0	0	0	0	0	0	0	0	0	0	0	1
MG: Probable 6-oxopurine nucleoside phosphorylase OS=Archaeoglobus fulgidus (strain ATCC 49558 / VC-16 / DSM 4304 / JCM 9628 / NBRC 100126) GN=AF_1788 PE=3 SV=1 [O28486] Score: 162.0	K00772	2.4.2.1	Archaea	Unknown	Euryarchaeota	Archaeoglobi	Archaeoglobales	Archaeoglobaceae	Archaeoglobus	Archaeoglobus fulgidus	-	0	0	0	0	0	0	0	0	0	0	0	0	0	0	0	0	0	0	0	0	0	0	0	0	0	0	0	0	0	0	0	0	0	0	0	0	0	0
MG: Exosome complex component Csl4 OS=Archaeoglobus fulgidus (strain ATCC 49558 / VC-16 / DSM 4304 / JCM 9628 / NBRC 100126) GN=csl4 PE=1 SV=1 [O30033] Score: 105.0	K07573	-	Archaea	Unknown	Euryarchaeota	Archaeoglobi	Archaeoglobales	Archaeoglobaceae	Archaeoglobus	Archaeoglobus fulgidus	-	0	0	0	0	0	0	0	0	0	0	0	0	0	0	0	0	0	0	0	0	0	0	0	0	0	0	0	0	0	0	0	0	0	0	0	0	0	0
PCNA_ARCFU DNA polymerase sliding clamp OS=Archaeoglobus fulgidus (strain ATCC 49558 / VC-16 / DSM 4304 / JCM 9628 / NBRC 100126) GN=pcn PE=1 SV=1	K04802	-	Archaea	Unknown	Euryarchaeota	Archaeoglobi	Archaeoglobales	Archaeoglobaceae	Archaeoglobus	Archaeoglobus fulgidus	-	0	0	0	0	0	0	0	0	0	0	0	0	0	0	0	0	0	0	0	0	0	0	0	0	0	0	0	0	0	0	0	0	0	0	0	0	0	0
MG: UPF0310 protein AF_2356 OS=Archaeoglobus fulgidus (strain ATCC 49558 / VC-16 / DSM 4304 / JCM 9628 / NBRC 100126) GN=AF_2356 PE=3 SV=1 [O30314] Score: 45.1	-	-	Archaea	Unknown	Euryarchaeota	Archaeoglobi	Archaeoglobales	Archaeoglobaceae	Archaeoglobus	Archaeoglobus fulgidus	-	0	0	0	0	0	0	0	0	0	0	0	0	0	0	0	0	0	0	0	0	0	0	0	0	0	0	0	0	0	0	0	0	0	0	0	0	0	0
MG: Uncharacterized transporter AF_0510 OS=Archaeoglobus fulgidus (strain ATCC 49558 / VC-16 / DSM 4304 / JCM 9628 / NBRC 100126) GN=AF_0510 PE=3 SV=1 [O29740] Score: 57.4	-	-	Archaea	Unknown	Euryarchaeota	Archaeoglobi	Archaeoglobales	Archaeoglobaceae	Archaeoglobus	Archaeoglobus fulgidus	-	0	0	0	0	0	0	0	0	0	0	0	0	0	0	0	0	0	0	0	0	0	0	0	0	0	0	0	0	0	0	0	0	0	0	0	0	0	0
MG: Uncharacterized transporter AF_0788 OS=Archaeoglobus fulgidus (strain ATCC 49558 / VC-16 / DSM 4304 / JCM 9628 / NBRC 100126) GN=AF_0788 PE=3 SV=1 [O29470] Score: 113.0	-	-	Archaea	Unknown	Euryarchaeota	Archaeoglobi	Archaeoglobales	Archaeoglobaceae	Archaeoglobus	Archaeoglobus fulgidus	-	0	0	0	0	0	0	0	0	0	0	0	0	0	0	0	0	0	0	0	0	0	0	0	0	0	0	0	0	0	0	0	0	0	0	0	0	0	0
MG: Heterodisulfide reductase subunit A-like protein OS=Archaeoglobus profundus (strain DSM 5631 / JCM 9629 / NBRC 100127 / Av18) GN=hdlA PE=1 SV=2 [P84626] Score: 50.8	K03388	1.8.-.-	Archaea	Unknown	Euryarchaeota	Archaeoglobi	Archaeoglobales	Archaeoglobaceae	Archaeoglobus	Archaeoglobus profundus	-	0	0	0	0	0	0	0	0	0	0	0	0	0	0	0	0	0	1	0	0	0	0	0	0	0	0	0	0	0	0	0	0	0	0	0	0	0	0
MG: Translation initiation factor 2 subunit alpha OS=Haloarcula marismortui (strain ATCC 43049 / DSM 3752 / JCM 8966 / VKM B-1809) GN=eif2a PE=3 SV=1 [Q5UX22] Score: 240.0	K03237	-	Archaea	Unknown	Euryarchaeota	Halobacteria	Halobacteriales	Halobacteriaceae	Haloarcula	Haloarcula marismortui	-	4	2	0	0	2	1	0	0	1	0	0	0	4	2	3	0	6	4	0	0	0	0	0	0	3	4	0	1	0	0	0	0	0	0	0	0	0	0
RNH2_HALMA Ribonuclease HII OS=Haloarcula marismortui (strain ATCC 43049 / DSM 3752 / JCM 8966 / VKM B-1809) GN=rnhB PE=3 SV=1	K03470	3.1.26.4	Archaea	Unknown	Euryarchaeota	Halobacteria	Halobacteriales	Halobacteriaceae	Haloarcula	Haloarcula marismortui	-	1	2	0	0	0	0	0	0	0	0	0	0	0	0	0	0	0	0	0	0	0	0	0	0	0	0	0	0	0	0	0	0	0	0	0	0	0	0
G6PI_HALMA Probable glucose-6-phosphate isomerase OS=Haloarcula marismortui (strain ATCC 43049 / DSM 3752 / JCM 8966 / VKM B-1809) GN=pgi PE=3 SV=2	K01810	5.3.1.9	Archaea	Unknown	Euryarchaeota	Halobacteria	Halobacteriales	Halobacteriaceae	Haloarcula	Haloarcula marismortui	-	0	0	0	0	0	0	0	0	1	0	0	0	0	0	0	0	0	0	0	0	0	0	0	0	0	0	0	0	0	0	0	0	0	0	0	0	1	0
MG: CCA-adding enzyme OS=Haloarcula marismortui (strain ATCC 43049 / DSM 3752 / JCM 8966 / VKM B-1809) GN=cca PE=3 SV=1 [Q5V030] Score: 302.0	K07558	2.7.7.72	Archaea	Unknown	Euryarchaeota	Halobacteria	Halobacteriales	Halobacteriaceae	Haloarcula	Haloarcula marismortui	-	0	0	0	0	0	0	0	0	0	0	0	0	0	0	0	0	0	0	0	0	0	0	0	0	0	0	1	0	0	0	0	0	0	0	0	0	0	0
RS13_HALMA 30S ribosomal protein S13 OS=Haloarcula marismortui (strain ATCC 43049 / DSM 3752 / JCM 8966 / VKM B-1809) GN=rps13 PE=3 SV=1	K02952	-	Archaea	Unknown	Euryarchaeota	Halobacteria	Halobacteriales	Halobacteriaceae	Haloarcula	Haloarcula marismortui	-	0	0	0	0	0	0	0	0	0	0	0	0	0	0	0	0	0	0	0	0	0	0	0	0	0	0	0	0	1	1	2	0	0	0	0	0	0	0
CDC6I_HALMA ORC1-type DNA replication protein 9 OS=Haloarcula marismortui (strain ATCC 43049 / DSM 3752 / JCM 8966 / VKM B-1809) GN=cdc6i PE=3 SV=2	K10725	-	Archaea	Unknown	Euryarchaeota	Halobacteria	Halobacteriales	Halobacteriaceae	Haloarcula	Haloarcula marismortui	-	0	0	0	0	0	0	0	0	0	0	0	0	0	0	0	0	0	0	0	0	0	0	0	0	0	0	0	0	0	0	0	0	0	0	0	1	0	0
MG: Putative arsenical pump-driving ATPase OS=Halobacterium salinarum (strain ATCC 700922 / JCM 11081 / NRC-1) GN=arsA PE=2 SV=1 [O52027] Score: 124.0	-	3.6.3.16	Archaea	Unknown	Euryarchaeota	Halobacteria	Halobacteriales	Halobacteriaceae	Halobacterium	Halobacterium salinarum	-	0	1	0	0	0	0	0	0	0	0	0	0	0	0	0	0	0	0	0	0	0	0	0	0	0	0	0	0	0	0	0	0	0	0	0	0	0	0
MG: DNA-directed RNA polymerase subunit B'' OS=Halobacterium salinarum (strain ATCC 700922 / JCM 11081 / NRC-1) GN=rpoB2 PE=3 SV=1 [P0CX04] Score: 635.0	K03045	2.7.7.6	Archaea	Unknown	Euryarchaeota	Halobacteria	Halobacteriales	Halobacteriaceae	Halobacterium	Halobacterium salinarum	-	0	0	0	0	0	0	0	0	0	0	0	0	1	0	0	0	0	0	0	0	0	0	0	0	0	0	0	0	0	0	0	0	0	0	0	0	0	0
MG: Cobalamin-binding protein OS=Halobacterium salinarum (strain ATCC 700922 / JCM 11081 / NRC-1) GN=btuF PE=1 SV=1 [Q9HQ20] Score: 94.7	K02016	-	Archaea	Unknown	Euryarchaeota	Halobacteria	Halobacteriales	Halobacteriaceae	Halobacterium	Halobacterium salinarum	-	0	0	0	0	0	0	0	0	0	0	0	0	3	4	1	1	1	4	0	0	0	0	0	0	0	0	0	0	0	0	0	0	0	0	0	0	0	0
MG: Cobalamin import ATP-binding protein BtuD OS=Halobacterium salinarum (strain ATCC 29341 / DSM 671 / R1) GN=btuD PE=3 SV=1 [B0R5G4] Score: 257.0	-	3.6.3.33	Archaea	Unknown	Euryarchaeota	Halobacteria	Halobacteriales	Halobacteriaceae	Halobacterium	Halobacterium salinarum	-	0	0	0	0	0	0	0	0	0	0	0	0	2	0	0	0	1	1	0	0	0	0	0	0	0	0	0	0	0	0	0	0	0	0	0	0	0	1
MG: Glutamate dehydrogenase A2 OS=Halobacterium salinarum (strain ATCC 700922 / JCM 11081 / NRC-1) GN=gdhA2 PE=3 SV=1 [Q9HQE1] Score: 406.0	K00261	1.4.1.-	Archaea	Unknown	Euryarchaeota	Halobacteria	Halobacteriales	Halobacteriaceae	Halobacterium	Halobacterium salinarum	-	0	0	0	0	0	0	0	0	0	0	0	0	0	0	0	0	0	2	0	0	0	0	0	0	1	0	1	0	0	0	0	0	0	1	0	0	0	0
MG: Putative dimethyl sulfoxide reductase iron-sulfur subunit B OS=Halobacterium salinarum (strain ATCC 700922 / JCM 11081 / NRC-1) GN=dmsB PE=2 SV=1 [Q9HR73] Score: 145.0	K00184	-	Archaea	Unknown	Euryarchaeota	Halobacteria	Halobacteriales	Halobacteriaceae	Halobacterium	Halobacterium salinarum	-	0	0	0	0	0	0	0	0	0	0	0	0	0	0	0	0	0	0	0	0	0	1	0	0	0	0	0	0	0	0	0	0	0	0	0	0	0	0
MG: HEAT repeat-containing taxis protein OE_2401F OS=Halobacterium salinarum (strain ATCC 29341 / DSM 671 / R1) GN=OE_2401F PE=1 SV=1 [B0R4J2] Score: 63.5	-	-	Archaea	Unknown	Euryarchaeota	Halobacteria	Halobacteriales	Halobacteriaceae	Halobacterium	Halobacterium salinarum	-	0	0	0	0	0	0	0	0	0	0	0	0	0	0	0	0	0	0	0	0	0	1	0	0	0	0	0	0	0	0	0	0	0	0	0	0	0	0
MG: Uncharacterized protein in transposable element ISH50 OS=Halobacterium salinarum (strain ATCC 700922 / JCM 11081 / NRC-1) GN=VNG_0918H PE=4 SV=2 [P04137] Score: 62.8	K07488|K07489	-	Archaea	Unknown	Euryarchaeota	Halobacteria	Halobacteriales	Halobacteriaceae	Halobacterium	Halobacterium salinarum	-	0	0	0	0	0	0	0	0	0	0	0	0	0	0	0	0	0	0	0	0	0	0	0	0	0	0	1	0	0	0	0	0	0	0	0	0	0	0
MG: Arginine deiminase OS=Halobacterium salinarum (strain ATCC 29341 / DSM 671 / R1) GN=arcA PE=1 SV=1 [B0R9X5] Score: 85.5	-	3.5.3.6	Archaea	Unknown	Euryarchaeota	Halobacteria	Halobacteriales	Halobacteriaceae	Halobacterium	Halobacterium salinarum	-	0	0	0	0	0	0	0	0	0	0	0	0	0	0	0	0	0	0	0	0	0	0	0	0	0	0	0	0	0	0	0	0	0	0	0	0	0	0
MG: V-type ATP synthase subunit I OS=Halobacterium salinarum (strain ATCC 700922 / JCM 11081 / NRC-1) GN=atpI PE=3 SV=1 [Q9HND8] Score: 83.2	K02123	-	Archaea	Unknown	Euryarchaeota	Halobacteria	Halobacteriales	Halobacteriaceae	Halobacterium	Halobacterium salinarum	-	0	0	0	0	0	0	0	0	0	0	0	0	0	0	0	0	0	0	0	0	0	0	0	0	0	0	0	0	0	0	0	0	0	0	0	0	0	0
RNP1_HALS3 Ribonuclease P protein component 1 OS=Halobacterium salinarum (strain ATCC 29341 / DSM 671 / R1) GN=rnp1 PE=3 SV=1	-	3.1.26.5	Archaea	Unknown	Euryarchaeota	Halobacteria	Halobacteriales	Halobacteriaceae	Halobacterium	Halobacterium salinarum	-	0	0	0	0	0	0	0	0	0	0	0	0	0	0	0	0	0	0	0	0	0	0	0	0	0	0	0	0	0	0	0	0	0	0	0	0	0	0
MG: Uncharacterized DapA-like lyase OE_1665R OS=Halobacterium salinarum (strain ATCC 29341 / DSM 671 / R1) GN=dapAL PE=3 SV=1 [B0R3D6] Score: 167.0	-	4.-.-.-	Archaea	Unknown	Euryarchaeota	Halobacteria	Halobacteriales	Halobacteriaceae	Halobacterium	Halobacterium salinarum	-	0	0	0	0	0	0	0	0	0	0	0	0	0	0	0	0	0	0	0	0	0	0	0	0	0	0	0	0	0	0	0	0	0	0	0	0	0	0
MG: Poly(3-hydroxyalkanoate) polymerase subunit PhaC OS=Haloferax mediterranei (strain ATCC 33500 / DSM 1411 / JCM 8866 / NBRC 14739 / NCIMB 2177 / R-4) GN=phaC PE=1 SV=1 [I3R9Z4] Score: 253.0	K03821	2.3.1.-	Archaea	Unknown	Euryarchaeota	Halobacteria	Halobacteriales	Halobacteriaceae	Haloferax	Haloferax mediterranei	-	1	0	0	0	0	0	0	0	0	0	0	0	0	0	0	0	0	0	0	0	0	0	0	0	0	0	0	0	0	0	0	0	0	0	0	0	0	0
MG: Tubulin-like protein CetZ1 OS=Haloferax volcanii (strain ATCC 29605 / DSM 3757 / JCM 8879 / NBRC 14742 / NCIMB 2012 / VKM B-1768 / DS2) GN=cetZ1 PE=1 SV=1 [D4GVD7] Score: 365.0	-	-	Archaea	Unknown	Euryarchaeota	Halobacteria	Halobacteriales	Halobacteriaceae	Haloferax	Haloferax volcanii	-	2	0	0	0	3	2	0	0	10	9	2	3	6	6	3	3	14	12	3	8	0	0	0	0	28	21	1	3	0	0	0	0	0	0	0	0	0	0
CAS5_HALVD CRISPR-associated protein Cas5 OS=Haloferax volcanii (strain ATCC 29605 / DSM 3757 / JCM 8879 / NBRC 14742 / NCIMB 2012 / VKM B-1768 / DS2) GN=cas5 PE=1 SV=1	K19116	-	Archaea	Unknown	Euryarchaeota	Halobacteria	Halobacteriales	Halobacteriaceae	Haloferax	Haloferax volcanii	-	1	0	0	0	0	0	0	0	0	0	0	0	4	4	5	0	6	4	3	4	0	0	0	0	0	0	0	0	0	0	3	3	0	0	0	0	2	1
MG: Glucose ABC transporter permease protein TsgB13 OS=Haloferax volcanii (strain ATCC 29605 / DSM 3757 / JCM 8879 / NBRC 14742 / NCIMB 2012 / VKM B-1768 / DS2) GN=tsgB13 PE=3 SV=1 [D4GPW2] Score: 128.0	K02057	-	Archaea	Unknown	Euryarchaeota	Halobacteria	Halobacteriales	Halobacteriaceae	Haloferax	Haloferax volcanii	-	0	0	1	0	0	0	0	0	0	0	0	0	0	0	0	0	0	0	0	0	0	0	0	0	0	0	1	0	0	0	0	0	0	0	0	0	0	0
MG: Fructose-bisphosphate aldolase class 2 OS=Haloferax volcanii (strain ATCC 29605 / DSM 3757 / JCM 8879 / NBRC 14742 / NCIMB 2012 / VKM B-1768 / DS2) GN=fba PE=1 SV=1 [D4GYE0] Score: 210.0	K01624	4.1.2.13	Archaea	Unknown	Euryarchaeota	Halobacteria	Halobacteriales	Halobacteriaceae	Haloferax	Haloferax volcanii	-	0	0	0	0	2	0	0	0	0	0	0	0	0	0	0	0	0	0	0	0	0	0	0	0	1	1	2	1	0	0	0	0	0	1	2	0	0	0
MG: Proteasome-activating nucleotidase 1 OS=Haloferax volcanii (strain ATCC 29605 / DSM 3757 / JCM 8879 / NBRC 14742 / NCIMB 2012 / VKM B-1768 / DS2) GN=pan1 PE=1 SV=2 [D4GUJ7] Score: 433.0	K03420	-	Archaea	Unknown	Euryarchaeota	Halobacteria	Halobacteriales	Halobacteriaceae	Haloferax	Haloferax volcanii	-	0	0	0	0	0	1	0	0	0	0	0	0	0	0	0	0	0	0	0	0	0	0	0	0	0	0	0	0	0	0	0	0	0	0	0	0	0	0
MG: Flagellin A2 OS=Haloferax volcanii (strain ATCC 29605 / DSM 3757 / JCM 8879 / NBRC 14742 / NCIMB 2012 / VKM B-1768 / DS2) GN=flgA2 PE=1 SV=1 [D4GWY2] Score: 69.3	K07325	-	Archaea	Unknown	Euryarchaeota	Halobacteria	Halobacteriales	Halobacteriaceae	Haloferax	Haloferax volcanii	-	0	0	0	0	0	0	1	0	0	0	0	0	0	0	0	0	0	0	0	0	0	0	0	0	0	0	0	0	0	0	0	0	0	0	0	0	0	0
MG: Small archaeal modifier protein 3 OS=Haloferax volcanii (strain ATCC 29605 / DSM 3757 / JCM 8879 / NBRC 14742 / NCIMB 2012 / VKM B-1768 / DS2) GN=samp3 PE=1 SV=2 [D4GVB0] Score: 60.1	K03636	-	Archaea	Unknown	Euryarchaeota	Halobacteria	Halobacteriales	Halobacteriaceae	Haloferax	Haloferax volcanii	-	0	0	0	0	0	0	1	3	0	1	0	0	0	0	0	0	0	0	0	0	0	0	0	0	0	0	0	0	0	0	0	0	0	0	0	0	0	0
MG: Dihydrolipoyl dehydrogenase OS=Haloferax volcanii (strain ATCC 29605 / DSM 3757 / JCM 8879 / NBRC 14742 / NCIMB 2012 / VKM B-1768 / DS2) GN=lpdA PE=1 SV=3 [Q04829] Score: 310.0	K00382	1.8.1.4	Archaea	Unknown	Euryarchaeota	Halobacteria	Halobacteriales	Halobacteriaceae	Haloferax	Haloferax volcanii	-	0	0	0	0	0	0	0	0	0	0	0	0	2	2	1	3	2	2	1	1	0	0	0	0	0	0	0	0	0	0	0	0	0	0	0	0	0	0
MG: Glycosyltransferase AglE OS=Haloferax volcanii (strain ATCC 29605 / DSM 3757 / JCM 8879 / NBRC 14742 / NCIMB 2012 / VKM B-1768 / DS2) GN=aglE PE=1 SV=1 [D4GYG7] Score: 57.4	-	2.4.1.-	Archaea	Unknown	Euryarchaeota	Halobacteria	Halobacteriales	Halobacteriaceae	Haloferax	Haloferax volcanii	-	0	0	0	0	0	0	0	0	0	0	0	0	1	0	0	0	0	0	0	0	0	0	0	0	0	0	0	0	0	0	0	0	0	0	0	0	0	0
MG: CRISPR-associated nuclease/helicase Cas3 OS=Haloferax volcanii (strain ATCC 29605 / DSM 3757 / JCM 8879 / NBRC 14742 / NCIMB 2012 / VKM B-1768 / DS2) GN=cas3 PE=3 SV=1 [D4GQN8] Score: 119.0	K07475	3.1.-.-|3.6.4.-	Archaea	Unknown	Euryarchaeota	Halobacteria	Halobacteriales	Halobacteriaceae	Haloferax	Haloferax volcanii	-	0	0	0	0	0	0	0	0	0	0	0	0	1	0	0	0	0	0	0	1	0	0	0	0	0	0	0	0	0	0	1	0	0	0	0	0	0	0
MG: Glycosyltransferase AglI OS=Haloferax volcanii (strain ATCC 29605 / DSM 3757 / JCM 8879 / NBRC 14742 / NCIMB 2012 / VKM B-1768 / DS2) GN=aglI PE=1 SV=1 [D4GYH2] Score: 79.0	-	2.4.1.-	Archaea	Unknown	Euryarchaeota	Halobacteria	Halobacteriales	Halobacteriaceae	Haloferax	Haloferax volcanii	-	0	0	0	0	0	0	0	0	0	0	0	0	0	0	0	0	1	0	0	0	0	0	0	0	0	0	0	0	0	0	0	0	0	0	0	0	0	0
MG: Putative glucose ABC transporter permease protein TsgC13 OS=Haloferax volcanii (strain ATCC 29605 / DSM 3757 / JCM 8879 / NBRC 14742 / NCIMB 2012 / VKM B-1768 / DS2) GN=tsgC13 PE=3 SV=1 [D4GPW1] Score: 62.8	K02057	-	Archaea	Unknown	Euryarchaeota	Halobacteria	Halobacteriales	Halobacteriaceae	Haloferax	Haloferax volcanii	-	0	0	0	0	0	0	0	0	0	0	0	0	0	0	0	0	2	0	0	0	0	0	0	0	0	0	0	0	0	0	0	0	0	1	0	0	0	0
MG: Glycosyltransferase AglJ OS=Haloferax volcanii (strain ATCC 29605 / DSM 3757 / JCM 8879 / NBRC 14742 / NCIMB 2012 / VKM B-1768 / DS2) GN=aglJ PE=1 SV=1 [D4GYG3] Score: 95.5	K00721	2.4.1.-	Archaea	Unknown	Euryarchaeota	Halobacteria	Halobacteriales	Halobacteriaceae	Haloferax	Haloferax volcanii	-	0	0	0	0	0	0	0	0	0	0	0	0	0	0	0	0	0	0	0	1	0	0	0	1	0	0	0	0	0	0	0	0	0	0	0	0	0	0
CETZ2_HALVD Tubulin-like protein CetZ2 OS=Haloferax volcanii (strain ATCC 29605 / DSM 3757 / JCM 8879 / NBRC 14742 / NCIMB 2012 / VKM B-1768 / DS2) GN=cetZ2 PE=1 SV=1	-	-	Archaea	Unknown	Euryarchaeota	Halobacteria	Halobacteriales	Halobacteriaceae	Haloferax	Haloferax volcanii	-	0	0	0	0	0	0	0	0	0	0	0	0	0	0	0	0	0	0	0	1	0	0	0	0	0	0	0	0	0	0	0	0	0	0	0	0	0	0
MG: Low-salt glycan biosynthesis hexosyltransferase Agl5 OS=Haloferax volcanii (strain ATCC 29605 / DSM 3757 / JCM 8879 / NBRC 14742 / NCIMB 2012 / VKM B-1768 / DS2) GN=agl5 PE=3 SV=1 [D4GU66] Score: 64.7	-	2.4.1.-	Archaea	Unknown	Euryarchaeota	Halobacteria	Halobacteriales	Halobacteriaceae	Haloferax	Haloferax volcanii	-	0	0	0	0	0	0	0	0	0	0	0	0	0	0	0	0	0	0	0	0	0	0	0	0	4	1	2	0	0	0	0	0	0	0	0	0	0	0
MG: DNA double-strand break repair Rad50 ATPase OS=Haloferax volcanii (strain ATCC 29605 / DSM 3757 / JCM 8879 / NBRC 14742 / NCIMB 2012 / VKM B-1768 / DS2) GN=rad50 PE=1 SV=1 [D4GUK1] Score: 49.7	K03546	-	Archaea	Unknown	Euryarchaeota	Halobacteria	Halobacteriales	Halobacteriaceae	Haloferax	Haloferax volcanii	-	0	0	0	0	0	0	0	0	0	0	0	0	0	0	0	0	0	0	0	0	0	0	0	0	0	1	0	0	0	0	0	0	0	0	0	0	0	0
MG: Probable anion ABC transporter permease protein HVO_1887 OS=Haloferax volcanii (strain ATCC 29605 / DSM 3757 / JCM 8879 / NBRC 14742 / NCIMB 2012 / VKM B-1768 / DS2) GN=HVO_1887 PE=3 SV=1 [D4GSY8] Score: 132.0	K05773	-	Archaea	Unknown	Euryarchaeota	Halobacteria	Halobacteriales	Halobacteriaceae	Haloferax	Haloferax volcanii	-	0	0	0	0	0	0	0	0	0	0	0	0	0	0	0	0	0	0	0	0	0	0	0	0	0	0	0	1	0	0	0	0	1	0	1	1	0	2
MG: Probable metalloprotease HVO_1016 OS=Haloferax volcanii (strain ATCC 29605 / DSM 3757 / JCM 8879 / NBRC 14742 / NCIMB 2012 / VKM B-1768 / DS2) GN=HVO_1016 PE=1 SV=1 [D4GVJ3] Score: 87.8	-	-	Archaea	Unknown	Euryarchaeota	Halobacteria	Halobacteriales	Halobacteriaceae	Haloferax	Haloferax volcanii	-	0	0	0	0	0	0	0	0	0	0	0	0	0	0	0	0	0	0	0	0	0	0	0	0	0	0	0	0	0	0	0	0	0	0	0	0	0	0
MG: SAMP-activating enzyme E1 OS=Haloferax volcanii (strain ATCC 29605 / DSM 3757 / JCM 8879 / NBRC 14742 / NCIMB 2012 / VKM B-1768 / DS2) GN=ubaA PE=1 SV=1 [D4GSF3] Score: 186.0	-	2.7.7.-	Archaea	Unknown	Euryarchaeota	Halobacteria	Halobacteriales	Halobacteriaceae	Haloferax	Haloferax volcanii	-	0	0	0	0	0	0	0	0	0	0	0	0	0	0	0	0	0	0	0	0	0	0	0	0	0	0	0	0	0	0	0	0	0	0	0	0	0	0
MG: Probable low-salt glycan biosynthesis flippase Agl15 OS=Haloferax volcanii (strain ATCC 29605 / DSM 3757 / JCM 8879 / NBRC 14742 / NCIMB 2012 / VKM B-1768 / DS2) GN=agl15 PE=3 SV=1 [D4GU68] Score: 63.9	-	-	Archaea	Unknown	Euryarchaeota	Halobacteria	Halobacteriales	Halobacteriaceae	Haloferax	Haloferax volcanii	-	0	0	0	0	0	0	0	0	0	0	0	0	0	0	0	0	0	0	0	0	0	0	0	0	0	0	0	0	0	0	0	0	0	0	0	0	0	0
MG: Halomucin OS=Haloquadratum walsbyi (strain DSM 16790 / HBSQ001) GN=hmu PE=3 SV=1 [Q18DN4] Score: 50.8	-	-	Archaea	Unknown	Euryarchaeota	Halobacteria	Halobacteriales	Halobacteriaceae	Haloquadratum	Haloquadratum walsbyi	-	0	1	0	0	6	10	18	26	2	0	0	0	0	0	1	0	0	0	0	0	2	4	0	0	0	0	0	0	0	0	0	0	1	0	0	0	0	2
KHSE_HALLT Homoserine kinase OS=Halorubrum lacusprofundi (strain ATCC 49239 / DSM 5036 / JCM 8891 / ACAM 34) GN=thrB PE=3 SV=1	K00872	2.7.1.39	Archaea	Unknown	Euryarchaeota	Halobacteria	Halobacteriales	Halobacteriaceae	Halorubrum	Halorubrum lacusprofundi	-	0	0	0	0	0	0	0	0	0	1	0	0	0	0	0	0	0	0	0	0	0	0	0	0	0	0	0	0	0	0	0	0	0	0	0	0	0	0
MG: Probable deoxycytidine triphosphate deaminase OS=Halorubrum lacusprofundi (strain ATCC 49239 / DSM 5036 / JCM 8891 / ACAM 34) GN=dcd PE=3 SV=1 [B9LSY2] Score: 88.2	K01494	3.5.4.13	Archaea	Unknown	Euryarchaeota	Halobacteria	Halobacteriales	Halobacteriaceae	Halorubrum	Halorubrum lacusprofundi	-	0	0	0	0	0	0	0	0	0	0	0	0	0	0	0	0	1	0	0	0	0	0	0	0	0	0	0	0	0	0	0	0	0	0	0	0	0	0
MG: Halolysin OS=Natrialba asiatica (strain ATCC 700177 / DSM 12278 / JCM 9576 / FERM P-10747 / NBRC 102637 / 172P1) GN=hly PE=1 SV=1 [P29143] Score: 179.0	-	3.4.21.-	Archaea	Unknown	Euryarchaeota	Halobacteria	Halobacteriales	Halobacteriaceae	Natrialba	Natrialba asiatica	-	0	0	3	1	0	0	0	3	0	0	0	0	0	0	0	0	0	0	0	0	0	0	0	0	0	2	0	0	0	0	0	0	0	0	2	0	0	0
TOP6B_NATPD Type 2 DNA topoisomerase 6 subunit B OS=Natronomonas pharaonis (strain ATCC 35678 / DSM 2160) GN=top6B PE=3 SV=1	K03167	5.99.1.3	Archaea	Unknown	Euryarchaeota	Halobacteria	Halobacteriales	Halobacteriaceae	Natronomonas	Natronomonas pharaonis	-	0	0	1	0	0	0	0	0	0	0	0	0	0	0	0	0	0	0	0	0	0	0	0	0	0	0	0	0	0	0	0	0	0	0	0	0	0	0
NADK_NATPD NAD kinase OS=Natronomonas pharaonis (strain ATCC 35678 / DSM 2160) GN=nadK PE=3 SV=1	K00858	2.7.1.23	Archaea	Unknown	Euryarchaeota	Halobacteria	Halobacteriales	Halobacteriaceae	Natronomonas	Natronomonas pharaonis	-	0	0	0	0	0	1	0	0	0	0	0	0	0	0	0	0	0	0	0	0	0	0	0	0	0	0	0	0	0	0	0	0	0	0	0	0	0	0
KTHY_NATPD Probable thymidylate kinase OS=Natronomonas pharaonis (strain ATCC 35678 / DSM 2160) GN=tmk PE=3 SV=1	K00943	2.7.4.9	Archaea	Unknown	Euryarchaeota	Halobacteria	Halobacteriales	Halobacteriaceae	Natronomonas	Natronomonas pharaonis	-	0	0	0	0	0	0	0	0	1	0	0	0	0	1	0	1	0	1	0	0	0	0	0	0	0	0	0	0	0	0	0	0	0	0	0	0	0	0
MG: Phosphate import ATP-binding protein PstB 2 OS=Natronomonas pharaonis (strain ATCC 35678 / DSM 2160) GN=pstB2 PE=3 SV=1 [Q3IQI3] Score: 190.0	K06857	3.6.3.27	Archaea	Unknown	Euryarchaeota	Halobacteria	Halobacteriales	Halobacteriaceae	Natronomonas	Natronomonas pharaonis	-	0	0	0	0	0	0	0	0	6	2	3	3	0	0	0	0	0	0	0	0	0	0	0	0	0	0	0	0	0	0	0	0	0	0	0	0	0	0
MG: Cell division protein FtsZ 2 OS=Halobacterium salinarum (strain ATCC 700922 / JCM 11081 / NRC-1) GN=ftsZ2 PE=3 SV=1 [P0DMR7] Score: 287.0	K03531	-	Archaea	Unknown	Euryarchaeota	Halobacteria	Halobacteriales	Halobacteriaceae	Unknown	Unknown	-	0	0	0	0	0	0	0	0	0	0	0	0	28	1	0	4	1	1	1	0	0	0	0	0	0	0	0	0	0	0	0	1	0	0	0	0	0	0
MG: Sensory rhodopsin II transducer OS=Natronomonas pharaonis GN=htr2 PE=1 SV=1 [P42259] Score: 80.9	-	-	Archaea	Unknown	Euryarchaeota	Halobacteria	Halobacteriales	Halobacteriaceae	Unknown	Unknown	-	0	0	0	0	0	0	0	0	0	0	0	0	0	0	0	0	1	0	0	0	0	0	0	0	0	0	0	0	0	0	0	0	0	0	0	0	0	0
FDHC_METFO Probable formate transporter OS=Methanobacterium formicicum GN=fdhC PE=3 SV=1	-	-	Archaea	Unknown	Euryarchaeota	Methanobacteria	Methanobacteriales	Methanobacteriaceae	Methanobacterium	Methanobacterium formicicum	-	0	0	0	0	0	0	0	0	0	0	0	0	0	0	0	0	0	0	0	0	10	10	8	6	0	0	0	0	0	0	0	0	0	0	0	0	0	0
MG: Uncharacterized protein in nifH2 5'region (Fragment) OS=Methanobacterium ivanovii PE=3 SV=1 [P25768] Score: 69.3	-	-	Archaea	Unknown	Euryarchaeota	Methanobacteria	Methanobacteriales	Methanobacteriaceae	Methanobacterium	Methanobacterium ivanovii	-	0	0	0	0	1	2	2	2	1	1	0	0	0	0	0	0	0	0	0	0	0	0	0	0	0	0	0	0	0	0	0	0	0	0	0	0	0	0
MTRA2_METRM Tetrahydromethanopterin S-methyltransferase subunit A 2 OS=Methanobrevibacter ruminantium (strain ATCC 35063 / DSM 1093 / JCM 13430 / OCM 146 / M1) GN=mtrA2 PE=3 SV=1	K00577	2.1.1.86	Archaea	Unknown	Euryarchaeota	Methanobacteria	Methanobacteriales	Methanobacteriaceae	Methanobrevibacter	Methanobrevibacter ruminantium	-	0	0	0	0	0	0	0	0	0	0	0	0	0	0	0	0	0	0	0	0	0	0	0	0	2	0	0	0	0	0	0	0	0	0	0	0	0	0
MTRA1_METRM Tetrahydromethanopterin S-methyltransferase subunit A 1 OS=Methanobrevibacter ruminantium (strain ATCC 35063 / DSM 1093 / JCM 13430 / M1) GN=mtrA1 PE=3 SV=1	K00577	2.1.1.86	Archaea	Unknown	Euryarchaeota	Methanobacteria	Methanobacteriales	Methanobacteriaceae	Methanobrevibacter	Methanobrevibacter ruminantium	-	0	0	0	0	0	0	0	0	0	0	0	0	0	0	0	0	0	0	0	0	0	0	0	0	1	0	0	0	0	0	0	0	0	0	0	0	0	0
MG: Digeranylgeranylglycerophospholipid reductase OS=Methanobrevibacter smithii (strain PS / ATCC 35061 / DSM 861) GN=Msm_1701 PE=3 SV=1 [A5UNX8] Score: 49.3	K17830	1.3.7.11	Archaea	Unknown	Euryarchaeota	Methanobacteria	Methanobacteriales	Methanobacteriaceae	Methanobrevibacter	Methanobrevibacter smithii	-	0	0	0	0	0	0	0	0	0	0	0	0	0	0	0	0	0	0	0	0	0	1	0	0	0	0	0	0	0	0	0	0	0	0	0	0	0	0
CBID_METS3 Cobalt-precorrin-5B C(1)-methyltransferase OS=Methanobrevibacter smithii (strain PS / ATCC 35061 / DSM 861) GN=cbiD PE=3 SV=1	K02188	2.1.1.195	Archaea	Unknown	Euryarchaeota	Methanobacteria	Methanobacteriales	Methanobacteriaceae	Methanobrevibacter	Methanobrevibacter smithii	-	0	0	0	0	0	0	0	0	0	0	0	0	0	0	0	0	0	0	0	0	0	0	0	0	0	0	0	0	0	0	0	0	0	0	1	0	0	0
SYA_METS3 Alanine--tRNA ligase OS=Methanobrevibacter smithii (strain PS / ATCC 35061 / DSM 861) GN=alaS PE=3 SV=1	K01872	6.1.1.7	Archaea	Unknown	Euryarchaeota	Methanobacteria	Methanobacteriales	Methanobacteriaceae	Methanobrevibacter	Methanobrevibacter smithii	-	0	0	0	0	0	0	0	0	0	0	0	0	0	0	0	0	0	0	0	0	0	0	0	0	0	0	0	0	0	0	0	0	0	0	0	0	0	0
PCNA_METST DNA polymerase sliding clamp OS=Methanosphaera stadtmanae (strain ATCC 43021 / DSM 3091 / JCM 11832 / MCB-3) GN=pcn PE=3 SV=1	K04802	-	Archaea	Unknown	Euryarchaeota	Methanobacteria	Methanobacteriales	Methanobacteriaceae	Methanosphaera	Methanosphaera stadtmanae	-	0	0	0	0	0	0	0	0	0	0	0	0	0	0	1	0	0	0	0	0	0	0	0	0	0	0	0	0	0	0	0	0	0	0	0	0	0	0
MG: Dihydroorotase OS=Methanosphaera stadtmanae (strain ATCC 43021 / DSM 3091 / JCM 11832 / MCB-3) GN=pyrC PE=3 SV=1 [Q2NHZ6] Score: 134.0	K01465	3.5.2.3	Archaea	Unknown	Euryarchaeota	Methanobacteria	Methanobacteriales	Methanobacteriaceae	Methanosphaera	Methanosphaera stadtmanae	-	0	0	0	0	0	0	0	0	0	0	0	0	0	0	1	0	0	0	0	0	0	0	0	0	0	0	0	0	0	0	0	0	0	0	0	0	0	0
MG: Uridylate kinase OS=Methanosphaera stadtmanae (strain ATCC 43021 / DSM 3091 / JCM 11832 / MCB-3) GN=pyrH PE=3 SV=1 [Q2NEL4] Score: 317.0	K09903	2.7.4.22	Archaea	Unknown	Euryarchaeota	Methanobacteria	Methanobacteriales	Methanobacteriaceae	Methanosphaera	Methanosphaera stadtmanae	-	0	0	0	0	0	0	0	0	0	0	0	0	0	0	0	0	0	0	0	0	0	0	0	0	0	0	0	0	0	0	0	0	0	0	0	0	0	0
MG: Tetrahydromethanopterin S-methyltransferase subunit G OS=Methanothermobacter marburgensis (strain DSM 2133 / 14651 / NBRC 100331 / OCM 82 / Marburg) GN=mtrG PE=1 SV=2 [Q50774] Score: 106.0	K00583	2.1.1.86	Archaea	Unknown	Euryarchaeota	Methanobacteria	Methanobacteriales	Methanobacteriaceae	Methanothermobacter	Methanothermobacter marburgensis	-	1	0	0	0	0	0	0	0	0	0	0	0	0	0	0	0	0	0	0	0	0	0	0	0	0	0	0	0	0	0	0	0	0	0	0	0	0	0
MG: Pyruvate synthase subunit PorD OS=Methanothermobacter marburgensis (strain DSM 2133 / 14651 / NBRC 100331 / OCM 82 / Marburg) GN=porD PE=1 SV=2 [P80903] Score: 89.0	K00171	-	Archaea	Unknown	Euryarchaeota	Methanobacteria	Methanobacteriales	Methanobacteriaceae	Methanothermobacter	Methanothermobacter marburgensis	-	0	1	0	0	0	0	0	0	0	0	0	0	0	0	0	0	0	0	0	0	0	0	0	0	0	0	0	0	0	0	0	0	0	0	0	0	0	0
MG: Tryptophan synthase alpha chain OS=Methanothermobacter marburgensis (strain DSM 2133 / 14651 / NBRC 100331 / OCM 82 / Marburg) GN=trpA PE=3 SV=1 [P26920] Score: 208.0	K01695	4.2.1.20	Archaea	Unknown	Euryarchaeota	Methanobacteria	Methanobacteriales	Methanobacteriaceae	Methanothermobacter	Methanothermobacter marburgensis	-	0	0	0	0	1	0	0	0	0	0	0	0	0	0	0	0	0	0	0	0	0	0	0	0	0	0	0	0	0	0	0	0	0	0	0	0	0	0
MG: Methionine synthase OS=Methanothermobacter marburgensis (strain DSM 2133 / 14651 / NBRC 100331 / OCM 82 / Marburg) GN=metE PE=1 SV=3 [P55299] Score: 48.9	K00549	2.1.1.-	Archaea	Unknown	Euryarchaeota	Methanobacteria	Methanobacteriales	Methanobacteriaceae	Methanothermobacter	Methanothermobacter marburgensis	-	0	0	0	0	0	0	8	2	2	2	0	0	0	0	0	0	0	0	0	0	0	0	0	0	0	0	0	0	0	0	0	0	0	0	0	0	0	0
MG: Tetrahydromethanopterin S-methyltransferase subunit C OS=Methanothermobacter marburgensis (strain DSM 2133 / 14651 / NBRC 100331 / OCM 82 / Marburg) GN=mtrC PE=1 SV=3 [P80185] Score: 296.0	K00579	2.1.1.86	Archaea	Unknown	Euryarchaeota	Methanobacteria	Methanobacteriales	Methanobacteriaceae	Methanothermobacter	Methanothermobacter marburgensis	-	0	0	0	0	0	0	2	2	0	0	0	0	0	0	0	0	0	0	0	0	0	0	0	0	0	0	0	0	0	0	0	0	0	0	0	0	0	0
MG: Uncharacterized protein MTBMA_c00490 OS=Methanothermobacter marburgensis (strain DSM 2133 / 14651 / NBRC 100331 / OCM 82 / Marburg) GN=MTBMA_c00490 PE=3 SV=2 [Q50770] Score: 55.5	-	-	Archaea	Unknown	Euryarchaeota	Methanobacteria	Methanobacteriales	Methanobacteriaceae	Methanothermobacter	Methanothermobacter marburgensis	-	0	0	0	0	0	0	0	0	0	1	0	0	0	0	0	0	0	0	0	0	0	0	0	0	0	0	0	0	0	0	0	0	0	0	0	0	0	0
MG: Uncharacterized protein MTBMA_p00010 OS=Methanothermobacter marburgensis (strain DSM 2133 / 14651 / NBRC 100331 / OCM 82 / Marburg) GN=MTBMA_p00010 PE=4 SV=2 [P14932] Score: 73.6	-	-	Archaea	Unknown	Euryarchaeota	Methanobacteria	Methanobacteriales	Methanobacteriaceae	Methanothermobacter	Methanothermobacter marburgensis	-	0	0	0	0	0	0	0	0	0	0	0	0	0	0	0	0	0	0	0	0	0	0	0	0	0	0	0	0	0	0	0	0	0	0	2	1	0	0
MG: Methyl-coenzyme M reductase I operon protein D OS=Methanothermobacter marburgensis (strain DSM 2133 / 14651 / NBRC 100331 / OCM 82 / Marburg) GN=mcrD PE=2 SV=2 [P11564] Score: 202.0	K03422	-	Archaea	Unknown	Euryarchaeota	Methanobacteria	Methanobacteriales	Methanobacteriaceae	Methanothermobacter	Methanothermobacter marburgensis	-	0	0	0	0	0	0	0	0	0	0	0	0	0	0	0	0	0	0	0	0	0	0	0	0	0	0	0	0	0	0	0	0	0	0	0	0	0	0
MG: UPF0051 protein MTH1150 homolog OS=Methanothermobacter thermoautotrophicus (strain Winter) PE=3 SV=1 [Q50519] Score: 489.0	-	-	Archaea	Unknown	Euryarchaeota	Methanobacteria	Methanobacteriales	Methanobacteriaceae	Methanothermobacter	Methanothermobacter thermautotrophicus	-	1	0	0	0	2	9	6	3	2	5	1	0	0	0	0	0	0	0	0	0	0	0	0	0	0	0	0	0	0	0	0	0	0	0	0	0	0	0
MG: Nascent polypeptide-associated complex protein OS=Methanothermobacter thermautotrophicus (strain ATCC 29096 / DSM 1053 / JCM 10044 / NBRC 100330 / Delta H) GN=nac PE=3 SV=1 [O26279] Score: 174.0	K03626	-	Archaea	Unknown	Euryarchaeota	Methanobacteria	Methanobacteriales	Methanobacteriaceae	Methanothermobacter	Methanothermobacter thermautotrophicus	-	2	2	0	0	0	0	0	0	0	0	0	0	0	0	0	0	0	0	0	0	0	0	0	0	0	0	0	0	0	0	0	0	0	0	0	0	0	0
MG: DNA-binding protein MTH_1615 OS=Methanothermobacter thermautotrophicus (strain ATCC 29096 / DSM 1053 / JCM 10044 / NBRC 100330 / Delta H) GN=MTH_1615 PE=1 SV=1 [O27652] Score: 159.0	-	-	Archaea	Unknown	Euryarchaeota	Methanobacteria	Methanobacteriales	Methanobacteriaceae	Methanothermobacter	Methanothermobacter thermautotrophicus	-	3	3	0	0	0	0	2	2	0	0	0	0	0	0	0	0	0	0	0	0	0	0	0	0	0	0	0	0	0	0	0	0	0	0	0	0	0	0
MG: Coenzyme F420 hydrogenase subunit beta OS=Methanothermobacter thermautotrophicus (strain ATCC 29096 / DSM 1053 / JCM 10044 / NBRC 100330 / Delta H) GN=frhB PE=1 SV=4 [P19499] Score: 442.0	K00441	1.12.98.1	Archaea	Unknown	Euryarchaeota	Methanobacteria	Methanobacteriales	Methanobacteriaceae	Methanothermobacter	Methanothermobacter thermautotrophicus	-	1	1	0	0	3	0	3	4	0	0	0	0	0	0	0	0	0	0	0	0	3	0	0	0	0	0	0	0	0	0	1	0	0	0	0	0	0	0
MG: Coenzyme F420 hydrogenase subunit gamma OS=Methanothermobacter thermautotrophicus (strain ATCC 29096 / DSM 1053 / JCM 10044 / NBRC 100330 / Delta H) GN=frhG PE=1 SV=4 [P19498] Score: 427.0	-	1.12.98.1	Archaea	Unknown	Euryarchaeota	Methanobacteria	Methanobacteriales	Methanobacteriaceae	Methanothermobacter	Methanothermobacter thermautotrophicus	-	5	5	1	0	0	0	9	4	1	2	2	1	0	0	0	0	0	0	0	0	2	2	0	0	0	0	0	0	4	6	4	3	3	4	4	1	0	0
MG: Uncharacterized protein MTH_1706 OS=Methanothermobacter thermautotrophicus (strain ATCC 29096 / DSM 1053 / JCM 10044 / NBRC 100330 / Delta H) GN=MTH_1706 PE=4 SV=1 [O27741] Score: 46.6	K02009	-	Archaea	Unknown	Euryarchaeota	Methanobacteria	Methanobacteriales	Methanobacteriaceae	Methanothermobacter	Methanothermobacter thermautotrophicus	-	97	68	0	0	12	7	4	8	1	0	1	0	2	6	8	4	1	2	4	4	0	0	0	0	0	0	0	0	10	20	18	11	0	0	0	0	0	0
MG: Methanogen homoaconitase small subunit OS=Methanothermobacter thermautotrophicus (strain ATCC 29096 / DSM 1053 / JCM 10044 / NBRC 100330 / Delta H) GN=hacB PE=3 SV=1 [O26917] Score: 142.0	K16793	4.2.1.114	Archaea	Unknown	Euryarchaeota	Methanobacteria	Methanobacteriales	Methanobacteriaceae	Methanothermobacter	Methanothermobacter thermautotrophicus	-	2	4	0	0	0	0	0	0	0	0	0	0	0	0	0	0	0	0	0	0	1	0	0	0	2	0	0	0	0	0	0	0	0	0	0	0	0	0
MG: Coenzyme F420 hydrogenase subunit alpha OS=Methanothermobacter thermautotrophicus (strain ATCC 29096 / DSM 1053 / JCM 10044 / NBRC 100330 / Delta H) GN=frhA PE=1 SV=3 [P19496] Score: 517.0	K00440	1.12.98.1	Archaea	Unknown	Euryarchaeota	Methanobacteria	Methanobacteriales	Methanobacteriaceae	Methanothermobacter	Methanothermobacter thermautotrophicus	-	20	18	1	1	12	14	37	40	0	4	3	3	0	0	0	0	0	0	0	0	6	6	2	4	0	0	0	0	8	4	8	6	6	6	6	11	1	2
MG: Tetrahydromethanopterin S-methyltransferase subunit E OS=Methanothermobacter thermautotrophicus (strain ATCC 29096 / DSM 1053 / JCM 10044 / NBRC 100330 / Delta H) GN=mtrE PE=3 SV=1 [O27231] Score: 433.0	K00581	2.1.1.86	Archaea	Unknown	Euryarchaeota	Methanobacteria	Methanobacteriales	Methanobacteriaceae	Methanothermobacter	Methanothermobacter thermautotrophicus	-	3	3	1	0	0	0	0	0	0	0	0	0	0	0	0	0	0	0	0	0	0	0	0	0	0	0	0	0	0	0	0	0	0	0	0	0	0	0
MG: V-type ATP synthase subunit I OS=Methanothermobacter thermautotrophicus (strain ATCC 29096 / DSM 1053 / JCM 10044 / NBRC 100330 / Delta H) GN=atpI PE=3 SV=1 [O27041] Score: 1124.0	-	-	Archaea	Unknown	Euryarchaeota	Methanobacteria	Methanobacteriales	Methanobacteriaceae	Methanothermobacter	Methanothermobacter thermautotrophicus	-	1	0	0	0	0	0	0	0	0	0	0	0	0	0	0	0	0	0	0	0	0	0	0	0	0	0	0	0	0	0	0	0	0	0	0	0	0	0
MG: Uncharacterized protein MTH_574 OS=Methanothermobacter thermautotrophicus (strain ATCC 29096 / DSM 1053 / JCM 10044 / NBRC 100330 / Delta H) GN=MTH_574 PE=3 SV=1 [O26674] Score: 165.0	-	-	Archaea	Unknown	Euryarchaeota	Methanobacteria	Methanobacteriales	Methanobacteriaceae	Methanothermobacter	Methanothermobacter thermautotrophicus	-	2	0	0	0	0	0	0	2	0	0	0	0	0	0	0	0	0	0	0	0	0	0	0	0	0	0	0	0	0	0	0	0	0	0	0	0	0	0
MG: Probable rubredoxin OS=Methanothermobacter thermautotrophicus (strain ATCC 29096 / DSM 1053 / JCM 10044 / NBRC 100330 / Delta H) GN=MTH_155 PE=3 SV=1 [O26258] Score: 72.8	-	-	Archaea	Unknown	Euryarchaeota	Methanobacteria	Methanobacteriales	Methanobacteriaceae	Methanothermobacter	Methanothermobacter thermautotrophicus	-	0	2	0	0	0	0	0	0	0	0	0	0	0	0	0	0	0	0	0	0	0	0	0	0	0	0	0	0	0	0	0	0	0	0	0	0	0	0
MG: 30S ribosomal protein S19e OS=Methanothermobacter thermautotrophicus (strain ATCC 29096 / DSM 1053 / JCM 10044 / NBRC 100330 / Delta H) GN=rps19e PE=3 SV=1 [O27653] Score: 219.0	-	-	Archaea	Unknown	Euryarchaeota	Methanobacteria	Methanobacteriales	Methanobacteriaceae	Methanothermobacter	Methanothermobacter thermautotrophicus	-	0	1	0	0	7	7	6	4	1	0	0	0	0	0	0	0	0	0	0	0	0	0	0	0	0	0	0	0	0	0	0	0	0	0	0	0	0	0
MG: Probable N-glycosylase/DNA lyase OS=Methanothermobacter thermautotrophicus (strain ATCC 29096 / DSM 1053 / JCM 10044 / NBRC 100330 / Delta H) GN=MTH_1342 PE=3 SV=1 [O27397] Score: 135.0	K03660	3.2.2.-|4.2.99.18	Archaea	Unknown	Euryarchaeota	Methanobacteria	Methanobacteriales	Methanobacteriaceae	Methanothermobacter	Methanothermobacter thermautotrophicus	-	0	1	0	0	0	0	0	0	0	0	0	0	0	0	0	0	0	0	0	0	0	0	0	0	0	0	0	0	0	0	0	0	0	0	0	0	0	0
MG: DNA polymerase II small subunit OS=Methanothermobacter thermautotrophicus (strain ATCC 29096 / DSM 1053 / JCM 10044 / NBRC 100330 / Delta H) GN=polB PE=3 SV=1 [O27456] Score: 635.0	-	2.7.7.7	Archaea	Unknown	Euryarchaeota	Methanobacteria	Methanobacteriales	Methanobacteriaceae	Methanothermobacter	Methanothermobacter thermautotrophicus	-	0	1	0	0	0	0	0	0	0	0	0	0	0	0	0	0	0	0	0	0	0	0	0	0	0	0	0	0	0	0	0	0	0	0	0	0	0	0
MG: Thiamine-monophosphate kinase OS=Methanothermobacter thermautotrophicus (strain ATCC 29096 / DSM 1053 / JCM 10044 / NBRC 100330 / Delta H) GN=thiL PE=3 SV=1 [O27447] Score: 186.0	-	2.7.4.16	Archaea	Unknown	Euryarchaeota	Methanobacteria	Methanobacteriales	Methanobacteriaceae	Methanothermobacter	Methanothermobacter thermautotrophicus	-	0	0	1	2	0	0	0	0	0	0	0	0	0	0	0	0	0	0	0	0	0	0	0	0	0	0	0	0	0	0	0	0	0	0	0	0	0	0
MG: Miro domain-containing protein MTH_765 OS=Methanothermobacter thermautotrophicus (strain ATCC 29096 / DSM 1053 / JCM 10044 / NBRC 100330 / Delta H) GN=MTH_765 PE=4 SV=1 [O26859] Score: 90.5	-	-	Archaea	Unknown	Euryarchaeota	Methanobacteria	Methanobacteriales	Methanobacteriaceae	Methanothermobacter	Methanothermobacter thermautotrophicus	-	0	0	1	0	0	0	0	0	0	0	0	0	0	0	0	0	0	0	0	0	0	0	0	0	0	0	0	0	0	0	0	0	0	0	0	0	0	0
ACDB_METTH no description	K00193	2.3.1.169	Archaea	Unknown	Euryarchaeota	Methanobacteria	Methanobacteriales	Methanobacteriaceae	Methanothermobacter	Methanothermobacter thermautotrophicus	-	0	0	1	1	1	0	1	2	1	0	0	3	0	0	0	0	0	0	0	0	1	3	0	0	0	0	0	0	0	0	0	0	0	0	0	0	0	0
MG: Protein MTH_538 OS=Methanothermobacter thermautotrophicus (strain ATCC 29096 / DSM 1053 / JCM 10044 / NBRC 100330 / Delta H) GN=MTH_538 PE=1 SV=1 [O26638] Score: 48.5	-	-	Archaea	Unknown	Euryarchaeota	Methanobacteria	Methanobacteriales	Methanobacteriaceae	Methanothermobacter	Methanothermobacter thermautotrophicus	-	0	0	0	2	0	0	0	0	0	0	0	0	0	0	0	0	0	0	0	0	0	0	0	0	0	0	0	0	0	0	0	0	0	0	0	0	0	0
MG: 50S ribosomal protein L30P OS=Methanothermobacter thermautotrophicus (strain ATCC 29096 / DSM 1053 / JCM 10044 / NBRC 100330 / Delta H) GN=rpl30p PE=3 SV=1 [O26132] Score: 201.0	K02907	-	Archaea	Unknown	Euryarchaeota	Methanobacteria	Methanobacteriales	Methanobacteriaceae	Methanothermobacter	Methanothermobacter thermautotrophicus	-	0	0	0	0	1	3	1	1	0	0	0	0	0	0	0	0	0	0	0	0	0	0	0	0	0	0	0	0	0	0	0	0	0	0	0	0	0	0
MG: Cobalt-precorrin-6A reductase OS=Methanothermobacter thermautotrophicus (strain ATCC 29096 / DSM 1053 / JCM 10044 / NBRC 100330 / Delta H) GN=cbiJ PE=3 SV=1 [O27083] Score: 125.0	K05895	1.3.1.106	Archaea	Unknown	Euryarchaeota	Methanobacteria	Methanobacteriales	Methanobacteriaceae	Methanothermobacter	Methanothermobacter thermautotrophicus	-	0	0	0	0	2	3	0	0	0	0	0	0	0	0	0	0	0	0	0	0	0	0	0	0	0	0	0	0	0	0	0	0	0	0	0	0	0	0
MG: Putative uroporphyrinogen-III synthase OS=Methanothermobacter thermautotrophicus (strain ATCC 29096 / DSM 1053 / JCM 10044 / NBRC 100330 / Delta H) GN=hemD PE=3 SV=1 [O26268] Score: 103.0	-	4.2.1.75	Archaea	Unknown	Euryarchaeota	Methanobacteria	Methanobacteriales	Methanobacteriaceae	Methanothermobacter	Methanothermobacter thermautotrophicus	-	0	0	0	0	2	0	0	1	0	0	1	0	0	0	0	0	0	0	0	0	0	0	0	0	0	0	0	0	0	0	0	0	0	0	0	0	0	0
MG: RNA 2',3'-cyclic phosphodiesterase OS=Methanothermobacter thermautotrophicus (strain ATCC 29096 / DSM 1053 / JCM 10044 / NBRC 100330 / Delta H) GN=MTH_583 PE=3 SV=1 [O26683] Score: 112.0	-	3.1.4.-	Archaea	Unknown	Euryarchaeota	Methanobacteria	Methanobacteriales	Methanobacteriaceae	Methanothermobacter	Methanothermobacter thermautotrophicus	-	0	0	0	0	2	0	0	0	0	0	0	0	0	0	0	0	0	0	0	0	0	0	0	0	0	0	0	0	0	0	0	0	0	0	0	0	0	0
MG: Ribosome maturation protein SDO1 homolog OS=Methanothermobacter thermautotrophicus (strain ATCC 29096 / DSM 1053 / JCM 10044 / NBRC 100330 / Delta H) GN=MTH_685 PE=1 SV=1 [O26781] Score: 266.0	-	-	Archaea	Unknown	Euryarchaeota	Methanobacteria	Methanobacteriales	Methanobacteriaceae	Methanothermobacter	Methanothermobacter thermautotrophicus	-	0	0	0	0	4	3	5	4	4	6	6	8	0	0	0	0	0	0	0	0	0	0	0	0	0	0	0	0	0	0	0	0	0	0	0	0	0	0
MG: Phosphoribosylformylglycinamidine synthase subunit PurS OS=Methanothermobacter thermautotrophicus (strain ATCC 29096 / DSM 1053 / JCM 10044 / NBRC 100330 / Delta H) GN=purS PE=1 SV=1 [O26271] Score: 81.3	K01952	6.3.5.3	Archaea	Unknown	Euryarchaeota	Methanobacteria	Methanobacteriales	Methanobacteriaceae	Methanothermobacter	Methanothermobacter thermautotrophicus	-	0	0	0	0	1	2	0	0	0	0	0	0	0	0	0	0	0	0	0	0	0	0	0	0	0	0	0	0	0	0	0	0	0	0	0	0	0	0
MG: UPF0145 protein MTH_544 OS=Methanothermobacter thermautotrophicus (strain ATCC 29096 / DSM 1053 / JCM 10044 / NBRC 100330 / Delta H) GN=MTH_544 PE=3 SV=2 [O26644] Score: 138.0	-	-	Archaea	Unknown	Euryarchaeota	Methanobacteria	Methanobacteriales	Methanobacteriaceae	Methanothermobacter	Methanothermobacter thermautotrophicus	-	0	0	0	0	2	0	2	0	0	0	0	0	0	0	0	0	0	0	0	0	0	0	0	0	0	0	0	0	0	0	0	0	0	0	0	0	0	0
MG: Uncharacterized protein MTH_793 OS=Methanothermobacter thermautotrophicus (strain ATCC 29096 / DSM 1053 / JCM 10044 / NBRC 100330 / Delta H) GN=MTH_793 PE=4 SV=1 [O26884] Score: 280.0	K00626	-	Archaea	Unknown	Euryarchaeota	Methanobacteria	Methanobacteriales	Methanobacteriaceae	Methanothermobacter	Methanothermobacter thermautotrophicus	-	0	0	0	0	0	1	4	0	0	2	0	0	0	0	0	0	0	0	0	0	2	1	0	2	0	1	0	0	0	0	3	0	0	0	0	0	0	0
MG: Tetrahydromethanopterin S-methyltransferase subunit F OS=Methanothermobacter thermautotrophicus (strain ATCC 29096 / DSM 1053 / JCM 10044 / NBRC 100330 / Delta H) GN=mtrF PE=3 SV=1 [O27226] Score: 93.2	-	2.1.1.86	Archaea	Unknown	Euryarchaeota	Methanobacteria	Methanobacteriales	Methanobacteriaceae	Methanothermobacter	Methanothermobacter thermautotrophicus	-	0	0	0	0	0	1	2	1	0	0	0	0	0	0	0	0	0	0	0	0	4	1	0	1	0	0	0	0	0	0	1	0	0	1	0	0	0	0
MG: Digeranylgeranylglycerophospholipid reductase 2 OS=Methanothermobacter thermautotrophicus (strain ATCC 29096 / DSM 1053 / JCM 10044 / NBRC 100330 / Delta H) GN=MTH_1718 PE=3 SV=2 [O27753] Score: 49.7	K17830	1.3.7.11	Archaea	Unknown	Euryarchaeota	Methanobacteria	Methanobacteriales	Methanobacteriaceae	Methanothermobacter	Methanothermobacter thermautotrophicus	-	0	0	0	0	0	1	0	0	0	0	0	0	0	0	0	0	0	0	0	0	0	0	0	0	0	0	0	0	0	0	0	0	0	0	0	0	0	0
MG: Uncharacterized protein MTH_867 OS=Methanothermobacter thermautotrophicus (strain ATCC 29096 / DSM 1053 / JCM 10044 / NBRC 100330 / Delta H) GN=MTH_867 PE=4 SV=1 [O26953] Score: 426.0	-	-	Archaea	Unknown	Euryarchaeota	Methanobacteria	Methanobacteriales	Methanobacteriaceae	Methanothermobacter	Methanothermobacter thermautotrophicus	-	0	0	0	0	0	0	5	5	3	2	3	3	0	0	1	0	0	0	0	0	0	0	0	0	0	0	0	0	0	0	0	0	0	0	0	0	2	0
MG: Isopentenyl phosphate kinase OS=Methanothermobacter thermautotrophicus (strain ATCC 29096 / DSM 1053 / JCM 10044 / NBRC 100330 / Delta H) GN=MTH_47 PE=1 SV=1 [O26153] Score: 132.0	K06981	2.7.4.26	Archaea	Unknown	Euryarchaeota	Methanobacteria	Methanobacteriales	Methanobacteriaceae	Methanothermobacter	Methanothermobacter thermautotrophicus	-	0	0	0	0	0	0	1	0	0	0	0	0	0	0	1	0	1	0	0	1	0	0	0	0	1	0	0	0	0	0	0	0	0	0	0	0	1	0
MG: Valine--tRNA ligase OS=Methanothermobacter thermautotrophicus (strain ATCC 29096 / DSM 1053 / JCM 10044 / NBRC 100330 / Delta H) GN=valS PE=3 SV=2 [O26861] Score: 90.1	-	6.1.1.9	Archaea	Unknown	Euryarchaeota	Methanobacteria	Methanobacteriales	Methanobacteriaceae	Methanothermobacter	Methanothermobacter thermautotrophicus	-	0	0	0	0	0	0	1	0	0	0	0	0	0	0	0	0	0	0	0	0	0	0	0	0	0	0	0	0	0	0	0	0	0	0	0	0	0	0
MG: Trk system potassium uptake protein TrkA homolog OS=Methanothermobacter thermautotrophicus (strain ATCC 29096 / DSM 1053 / JCM 10044 / NBRC 100330 / Delta H) GN=trkA PE=3 SV=2 [O27333] Score: 92.8	-	-	Archaea	Unknown	Euryarchaeota	Methanobacteria	Methanobacteriales	Methanobacteriaceae	Methanothermobacter	Methanothermobacter thermautotrophicus	-	0	0	0	0	0	0	0	1	0	0	0	0	0	0	0	0	0	0	0	0	0	0	0	0	0	0	0	0	0	0	0	0	0	0	0	0	0	0
MG: UPF0104 membrane protein MTH_1261 OS=Methanothermobacter thermautotrophicus (strain ATCC 29096 / DSM 1053 / JCM 10044 / NBRC 100330 / Delta H) GN=MTH_1261 PE=3 SV=1 [O27329] Score: 54.3	K07027	-	Archaea	Unknown	Euryarchaeota	Methanobacteria	Methanobacteriales	Methanobacteriaceae	Methanothermobacter	Methanothermobacter thermautotrophicus	-	0	0	0	0	0	0	0	1	0	0	0	0	0	0	0	0	0	0	0	0	0	0	0	0	0	0	0	0	0	0	0	0	0	0	0	0	0	0
MG: Probable cysteine desulfurase OS=Methanothermobacter thermautotrophicus (strain ATCC 29096 / DSM 1053 / JCM 10044 / NBRC 100330 / Delta H) GN=csd PE=3 SV=1 [O27442] Score: 203.0	-	2.8.1.7	Archaea	Unknown	Euryarchaeota	Methanobacteria	Methanobacteriales	Methanobacteriaceae	Methanothermobacter	Methanothermobacter thermautotrophicus	-	0	0	0	0	0	0	0	1	0	0	0	0	0	1	0	1	0	0	1	0	0	0	0	0	0	0	2	0	0	0	0	0	0	0	0	0	0	0
MG: DNA-directed RNA polymerase subunit M OS=Methanothermobacter thermautotrophicus (strain ATCC 29096 / DSM 1053 / JCM 10044 / NBRC 100330 / Delta H) GN=rpoM PE=3 SV=2 [O27369] Score: 85.5	K03057	-	Archaea	Unknown	Euryarchaeota	Methanobacteria	Methanobacteriales	Methanobacteriaceae	Methanothermobacter	Methanothermobacter thermautotrophicus	-	0	0	0	0	0	0	0	1	0	0	0	0	0	0	0	0	0	0	0	0	0	0	0	0	0	0	0	0	0	0	0	0	0	0	0	0	0	0
MG: Coenzyme F420:L-glutamate ligase OS=Methanothermobacter thermautotrophicus (strain ATCC 29096 / DSM 1053 / JCM 10044 / NBRC 100330 / Delta H) GN=cofE PE=3 SV=1 [O27098] Score: 52.8	K12234	6.3.2.31|6.3.2.34	Archaea	Unknown	Euryarchaeota	Methanobacteria	Methanobacteriales	Methanobacteriaceae	Methanothermobacter	Methanothermobacter thermautotrophicus	-	0	0	0	0	0	0	0	0	0	0	0	1	0	0	0	0	0	0	0	0	0	0	0	0	0	0	0	0	0	0	0	0	0	0	0	0	1	0
MG: Uncharacterized HAD-hydrolase MTH_209 OS=Methanothermobacter thermautotrophicus (strain ATCC 29096 / DSM 1053 / JCM 10044 / NBRC 100330 / Delta H) GN=MTH_209 PE=3 SV=1 [O26311] Score: 69.3	K07025	3.1.3.-	Archaea	Unknown	Euryarchaeota	Methanobacteria	Methanobacteriales	Methanobacteriaceae	Methanothermobacter	Methanothermobacter thermautotrophicus	-	0	0	0	0	0	0	0	0	0	0	0	1	0	0	1	0	0	0	0	0	0	0	0	0	0	0	0	0	0	2	0	0	0	0	0	0	0	0
MG: Ribonuclease P protein component 3 OS=Methanothermobacter thermautotrophicus (strain ATCC 29096 / DSM 1053 / JCM 10044 / NBRC 100330 / Delta H) GN=rnp3 PE=1 SV=1 [O26784] Score: 99.0	K03539	3.1.26.5	Archaea	Unknown	Euryarchaeota	Methanobacteria	Methanobacteriales	Methanobacteriaceae	Methanothermobacter	Methanothermobacter thermautotrophicus	-	0	0	0	0	0	0	0	0	0	0	0	0	2	1	1	0	0	0	0	0	0	0	0	0	0	0	0	0	0	0	0	1	0	0	0	0	0	1
MG: Uncharacterized protein ORF2 OS=Methanothermobacter thermautotrophicus PE=4 SV=1 [P29571] Score: 164.0	-	-	Archaea	Unknown	Euryarchaeota	Methanobacteria	Methanobacteriales	Methanobacteriaceae	Methanothermobacter	Methanothermobacter thermautotrophicus	-	0	0	0	0	0	0	0	0	0	0	0	0	1	0	0	0	0	0	0	0	0	0	1	0	0	0	0	0	0	0	0	0	0	0	0	0	0	0
MG: Phosphoribosylaminoimidazole-succinocarboxamide synthase OS=Methanothermobacter thermautotrophicus (strain ATCC 29096 / DSM 1053 / JCM 10044 / NBRC 100330 / Delta H) GN=purC PE=3 SV=1 [O26272] Score: 428.0	K01923	6.3.2.6	Archaea	Unknown	Euryarchaeota	Methanobacteria	Methanobacteriales	Methanobacteriaceae	Methanothermobacter	Methanothermobacter thermautotrophicus	-	0	0	0	0	0	0	0	0	0	0	0	0	1	0	0	0	0	0	0	0	0	0	0	0	0	0	0	0	0	0	0	0	0	0	0	0	0	0
MG: Putative metallophosphoesterase MTH_1774 OS=Methanothermobacter thermautotrophicus (strain ATCC 29096 / DSM 1053 / JCM 10044 / NBRC 100330 / Delta H) GN=MTH_1774 PE=3 SV=1 [O27802] Score: 112.0	K07095	3.1.4.-	Archaea	Unknown	Euryarchaeota	Methanobacteria	Methanobacteriales	Methanobacteriaceae	Methanothermobacter	Methanothermobacter thermautotrophicus	-	0	0	0	0	0	0	0	0	0	0	0	0	2	3	1	0	1	0	0	0	0	0	0	0	0	0	0	0	0	0	0	0	0	0	0	0	0	0
HIS6_METTH Imidazole glycerol phosphate synthase subunit HisF OS=Methanothermobacter thermautotrophicus (strain ATCC 29096 / DSM 1053 / JCM 10044 / NBRC 100330 / Delta H) GN=hisF PE=3 SV=2	K02500	4.1.3.-	Archaea	Unknown	Euryarchaeota	Methanobacteria	Methanobacteriales	Methanobacteriaceae	Methanothermobacter	Methanothermobacter thermautotrophicus	-	0	0	0	0	0	0	0	0	0	0	0	0	0	0	1	0	0	0	0	0	0	0	0	0	0	0	0	0	0	0	0	0	0	0	0	0	0	0
MG: Inorganic pyrophosphatase OS=Methanothermobacter thermautotrophicus (strain ATCC 29096 / DSM 1053 / JCM 10044 / NBRC 100330 / Delta H) GN=ppa PE=3 SV=1 [O26363] Score: 188.0	K01507	3.6.1.1	Archaea	Unknown	Euryarchaeota	Methanobacteria	Methanobacteriales	Methanobacteriaceae	Methanothermobacter	Methanothermobacter thermautotrophicus	-	0	0	0	0	0	0	0	0	0	0	0	0	0	0	0	1	0	0	0	0	0	0	0	0	0	0	0	0	0	0	0	1	0	0	0	0	0	0
TRPF_METTH N-(5'-phosphoribosyl)anthranilate isomerase OS=Methanothermobacter thermautotrophicus (strain ATCC 29096 / DSM 1053 / JCM 10044 / NBRC 100330 / Delta H) GN=trpF PE=3 SV=1	-	5.3.1.24	Archaea	Unknown	Euryarchaeota	Methanobacteria	Methanobacteriales	Methanobacteriaceae	Methanothermobacter	Methanothermobacter thermautotrophicus	-	0	0	0	0	0	0	0	0	0	0	0	0	0	0	0	0	3	2	1	0	0	0	0	0	0	0	0	0	0	0	0	0	0	0	0	0	0	0
ASPD_METTH Probable L-aspartate dehydrogenase OS=Methanothermobacter thermautotrophicus (strain ATCC 29096 / DSM 1053 / JCM 10044 / NBRC 100330 / Delta H) GN=nadX PE=3 SV=1	-	1.4.1.21	Archaea	Unknown	Euryarchaeota	Methanobacteria	Methanobacteriales	Methanobacteriaceae	Methanothermobacter	Methanothermobacter thermautotrophicus	-	0	0	0	0	0	0	0	0	0	0	0	0	0	0	0	0	0	1	0	0	0	0	0	0	0	0	0	0	0	0	0	0	0	0	0	0	0	0
MG: Coenzyme F420 hydrogenase subunit delta OS=Methanothermobacter thermautotrophicus (strain ATCC 29096 / DSM 1053 / JCM 10044 / NBRC 100330 / Delta H) GN=frhD PE=3 SV=1 [P19497] Score: 62.8	-	-	Archaea	Unknown	Euryarchaeota	Methanobacteria	Methanobacteriales	Methanobacteriaceae	Methanothermobacter	Methanothermobacter thermautotrophicus	-	0	0	0	0	0	0	0	0	0	0	0	0	0	0	0	0	0	0	1	0	0	0	0	0	0	0	0	0	0	0	0	0	0	0	0	0	0	0
MG: tRNA-guanine(15) transglycosylase OS=Methanothermobacter thermautotrophicus (strain ATCC 29096 / DSM 1053 / JCM 10044 / NBRC 100330 / Delta H) GN=tgtA PE=3 SV=2 [O26278] Score: 92.8	-	2.4.2.48	Archaea	Unknown	Euryarchaeota	Methanobacteria	Methanobacteriales	Methanobacteriaceae	Methanothermobacter	Methanothermobacter thermautotrophicus	-	0	0	0	0	0	0	0	0	0	0	0	0	0	0	0	0	0	0	1	0	0	0	0	0	0	0	0	0	0	0	0	0	0	0	0	0	0	0
MG: Indolepyruvate oxidoreductase subunit IorA OS=Methanothermobacter thermautotrophicus (strain ATCC 29096 / DSM 1053 / JCM 10044 / NBRC 100330 / Delta H) GN=iorA PE=3 SV=1 [O27880] Score: 117.0	K00179	1.2.7.8	Archaea	Unknown	Euryarchaeota	Methanobacteria	Methanobacteriales	Methanobacteriaceae	Methanothermobacter	Methanothermobacter thermautotrophicus	-	0	0	0	0	0	0	0	0	0	0	0	0	0	0	0	0	0	0	0	1	0	0	0	0	0	0	0	0	0	0	0	0	0	0	0	0	0	0
MG: tRNA (guanine(10)-N2)-dimethyltransferase OS=Methanothermobacter thermautotrophicus (strain ATCC 29096 / DSM 1053 / JCM 10044 / NBRC 100330 / Delta H) GN=trmG10 PE=3 SV=1 [O26820] Score: 63.5	K07446	2.1.1.213	Archaea	Unknown	Euryarchaeota	Methanobacteria	Methanobacteriales	Methanobacteriaceae	Methanothermobacter	Methanothermobacter thermautotrophicus	-	0	0	0	0	0	0	0	0	0	0	0	0	0	0	0	0	0	0	0	1	0	0	0	0	0	0	0	0	0	0	0	0	0	0	0	0	0	0
MG: UPF0147 protein MTH_1407 OS=Methanothermobacter thermautotrophicus (strain ATCC 29096 / DSM 1053 / JCM 10044 / NBRC 100330 / Delta H) GN=MTH_1407 PE=3 SV=1 [O27458] Score: 126.0	-	-	Archaea	Unknown	Euryarchaeota	Methanobacteria	Methanobacteriales	Methanobacteriaceae	Methanothermobacter	Methanothermobacter thermautotrophicus	-	0	0	0	0	0	0	0	0	0	0	0	0	0	0	0	0	0	0	0	0	2	1	1	0	0	0	0	0	0	0	0	0	0	0	0	0	0	0
HIS2_METTH Phosphoribosyl-ATP pyrophosphatase OS=Methanothermobacter thermautotrophicus (strain ATCC 29096 / DSM 1053 / JCM 10044 / NBRC 100330 / Delta H) GN=hisE PE=3 SV=1	K01523	3.6.1.31	Archaea	Unknown	Euryarchaeota	Methanobacteria	Methanobacteriales	Methanobacteriaceae	Methanothermobacter	Methanothermobacter thermautotrophicus	-	0	0	0	0	0	0	0	0	0	0	0	0	0	0	0	0	0	0	0	0	0	3	0	0	0	0	0	0	0	0	0	0	0	0	0	0	0	0
OTC_METTH Ornithine carbamoyltransferase OS=Methanothermobacter thermautotrophicus (strain ATCC 29096 / DSM 1053 / JCM 10044 / NBRC 100330 / Delta H) GN=argF PE=3 SV=1	-	2.1.3.3	Archaea	Unknown	Euryarchaeota	Methanobacteria	Methanobacteriales	Methanobacteriaceae	Methanothermobacter	Methanothermobacter thermautotrophicus	-	0	0	0	0	0	0	0	0	0	0	0	0	0	0	0	0	0	0	0	0	0	1	0	0	0	0	0	0	0	0	0	0	0	0	0	0	0	0
MG: Phosphate-specific transport system accessory protein PhoU homolog 2 OS=Methanothermobacter thermautotrophicus (strain ATCC 29096 / DSM 1053 / JCM 10044 / NBRC 100330 / Delta H) GN=MTH_1732 PE=3 SV=1 [O27765] Score: 344.0	-	-	Archaea	Unknown	Euryarchaeota	Methanobacteria	Methanobacteriales	Methanobacteriaceae	Methanothermobacter	Methanothermobacter thermautotrophicus	-	0	0	0	0	0	0	0	0	0	0	0	0	0	0	0	0	0	0	0	0	0	0	0	1	0	0	0	0	0	0	0	0	0	0	0	0	0	0
MG: V-type ATP synthase subunit D OS=Methanothermobacter thermautotrophicus (strain ATCC 29096 / DSM 1053 / JCM 10044 / NBRC 100330 / Delta H) GN=atpD PE=3 SV=1 [O27034] Score: 376.0	-	-	Archaea	Unknown	Euryarchaeota	Methanobacteria	Methanobacteriales	Methanobacteriaceae	Methanothermobacter	Methanothermobacter thermautotrophicus	-	0	0	0	0	0	0	0	0	0	0	0	0	0	0	0	0	0	0	0	0	0	0	0	0	2	6	0	2	0	0	0	1	1	1	1	0	0	0
MG: Probable cobalamin biosynthesis protein CobD OS=Methanothermobacter thermautotrophicus (strain ATCC 29096 / DSM 1053 / JCM 10044 / NBRC 100330 / Delta H) GN=cobD PE=3 SV=1 [O27460] Score: 206.0	K02227	-	Archaea	Unknown	Euryarchaeota	Methanobacteria	Methanobacteriales	Methanobacteriaceae	Methanothermobacter	Methanothermobacter thermautotrophicus	-	0	0	0	0	0	0	0	0	0	0	0	0	0	0	0	0	0	0	0	0	0	0	0	0	1	0	0	0	0	0	0	0	0	0	0	0	0	0
MG: Ribonuclease Z OS=Methanothermobacter thermautotrophicus (strain ATCC 29096 / DSM 1053 / JCM 10044 / NBRC 100330 / Delta H) GN=rnz PE=3 SV=1 [O27859] Score: 63.2	-	3.1.26.11	Archaea	Unknown	Euryarchaeota	Methanobacteria	Methanobacteriales	Methanobacteriaceae	Methanothermobacter	Methanothermobacter thermautotrophicus	-	0	0	0	0	0	0	0	0	0	0	0	0	0	0	0	0	0	0	0	0	0	0	0	0	0	1	0	0	0	0	0	0	0	0	0	0	0	0
AROD_METTH 3-dehydroquinate dehydratase OS=Methanothermobacter thermautotrophicus (strain ATCC 29096 / DSM 1053 / JCM 10044 / NBRC 100330 / Delta H) GN=aroD PE=3 SV=1	K03785	4.2.1.10	Archaea	Unknown	Euryarchaeota	Methanobacteria	Methanobacteriales	Methanobacteriaceae	Methanothermobacter	Methanothermobacter thermautotrophicus	-	0	0	0	0	0	0	0	0	0	0	0	0	0	0	0	0	0	0	0	0	0	0	0	0	0	0	0	0	2	0	0	0	0	0	0	0	0	0
MG: Type 2 DNA topoisomerase 6 subunit B OS=Methanothermobacter thermautotrophicus (strain ATCC 29096 / DSM 1053 / JCM 10044 / NBRC 100330 / Delta H) GN=top6B PE=3 SV=1 [O27088] Score: 487.0	K03167	5.99.1.3	Archaea	Unknown	Euryarchaeota	Methanobacteria	Methanobacteriales	Methanobacteriaceae	Methanothermobacter	Methanothermobacter thermautotrophicus	-	0	0	0	0	0	0	0	0	0	0	0	0	0	0	0	0	0	0	0	0	0	0	0	0	0	0	0	0	1	0	0	0	0	0	0	0	0	0
MG: Diaminopimelate decarboxylase OS=Methanothermobacter thermautotrophicus (strain ATCC 29096 / DSM 1053 / JCM 10044 / NBRC 100330 / Delta H) GN=lysA PE=3 SV=1 [O27390] Score: 273.0	K01586	4.1.1.20	Archaea	Unknown	Euryarchaeota	Methanobacteria	Methanobacteriales	Methanobacteriaceae	Methanothermobacter	Methanothermobacter thermautotrophicus	-	0	0	0	0	0	0	0	0	0	0	0	0	0	0	0	0	0	0	0	0	0	0	0	0	0	0	0	0	0	0	0	0	0	1	0	0	0	0
MG: Uncharacterized HTH-type transcriptional regulator MTH_1285 OS=Methanothermobacter thermautotrophicus (strain ATCC 29096 / DSM 1053 / JCM 10044 / NBRC 100330 / Delta H) GN=MTH_1285 PE=3 SV=1 [O27346] Score: 92.8	-	-	Archaea	Unknown	Euryarchaeota	Methanobacteria	Methanobacteriales	Methanobacteriaceae	Methanothermobacter	Methanothermobacter thermautotrophicus	-	0	0	0	0	0	0	0	0	0	0	0	0	0	0	0	0	0	0	0	0	0	0	0	0	0	0	0	0	0	0	0	0	0	0	1	0	0	0
MG: V-type ATP synthase subunit C OS=Methanothermobacter thermautotrophicus (strain ATCC 29096 / DSM 1053 / JCM 10044 / NBRC 100330 / Delta H) GN=atpC PE=3 SV=1 [O27038] Score: 490.0	K02119	-	Archaea	Unknown	Euryarchaeota	Methanobacteria	Methanobacteriales	Methanobacteriaceae	Methanothermobacter	Methanothermobacter thermautotrophicus	-	0	0	0	0	0	0	0	0	0	0	0	0	0	0	0	0	0	0	0	0	0	0	0	0	0	0	0	0	0	0	0	0	0	0	0	1	0	0
MG: Metalloprotease MTH_856 OS=Methanothermobacter thermautotrophicus (strain ATCC 29096 / DSM 1053 / JCM 10044 / NBRC 100330 / Delta H) GN=MTH_856 PE=3 SV=1 [O26944] Score: 301.0	K03568	3.4.-.-	Archaea	Unknown	Euryarchaeota	Methanobacteria	Methanobacteriales	Methanobacteriaceae	Methanothermobacter	Methanothermobacter thermautotrophicus	-	0	0	0	0	0	0	0	0	0	0	0	0	0	0	0	0	0	0	0	0	0	0	0	0	0	0	0	0	0	0	0	0	0	0	0	0	1	0
MG: Phosphatidylserine decarboxylase proenzyme OS=Methanothermobacter thermautotrophicus (strain ATCC 29096 / DSM 1053 / JCM 10044 / NBRC 100330 / Delta H) GN=psd PE=3 SV=1 [O27105] Score: 259.0	K01613	4.1.1.-	Archaea	Unknown	Euryarchaeota	Methanobacteria	Methanobacteriales	Methanobacteriaceae	Methanothermobacter	Methanothermobacter thermautotrophicus	-	0	0	0	0	0	0	0	0	0	0	0	0	0	0	0	0	0	0	0	0	0	0	0	0	0	0	0	0	0	0	0	0	0	0	0	0	0	1
MG: Uncharacterized protein MTH_1522 OS=Methanothermobacter thermautotrophicus (strain ATCC 29096 / DSM 1053 / JCM 10044 / NBRC 100330 / Delta H) GN=MTH_1522 PE=4 SV=1 [O27566] Score: 143.0	-	-	Archaea	Unknown	Euryarchaeota	Methanobacteria	Methanobacteriales	Methanobacteriaceae	Methanothermobacter	Methanothermobacter thermautotrophicus	-	0	0	0	0	0	0	0	0	0	0	0	0	0	0	0	0	0	0	0	0	0	0	0	0	0	0	0	0	0	0	0	0	0	0	0	0	0	0
MG: Thioredoxin OS=Methanothermobacter thermautotrophicus (strain ATCC 29096 / DSM 1053 / JCM 10044 / NBRC 100330 / Delta H) GN=MTH_895 PE=1 SV=1 [O26981] Score: 73.2	-	-	Archaea	Unknown	Euryarchaeota	Methanobacteria	Methanobacteriales	Methanobacteriaceae	Methanothermobacter	Methanothermobacter thermautotrophicus	-	0	0	0	0	0	0	0	0	0	0	0	0	0	0	0	0	0	0	0	0	0	0	0	0	0	0	0	0	0	0	0	0	0	0	0	0	0	0
MG: UPF0216 protein MTH_949 OS=Methanothermobacter thermautotrophicus (strain ATCC 29096 / DSM 1053 / JCM 10044 / NBRC 100330 / Delta H) GN=MTH_949 PE=3 SV=1 [O27030] Score: 183.0	K09737	-	Archaea	Unknown	Euryarchaeota	Methanobacteria	Methanobacteriales	Methanobacteriaceae	Methanothermobacter	Methanothermobacter thermautotrophicus	-	0	0	0	0	0	0	0	0	0	0	0	0	0	0	0	0	0	0	0	0	0	0	0	0	0	0	0	0	0	0	0	0	0	0	0	0	0	0
MG: Protein translocase subunit SecY OS=Methanothermobacter thermautotrophicus (strain ATCC 29096 / DSM 1053 / JCM 10044 / NBRC 100330 / Delta H) GN=secY PE=3 SV=1 [O26134] Score: 622.0	-	-	Archaea	Unknown	Euryarchaeota	Methanobacteria	Methanobacteriales	Methanobacteriaceae	Methanothermobacter	Methanothermobacter thermautotrophicus	-	0	0	0	0	0	0	0	0	0	0	0	0	0	0	0	0	0	0	0	0	0	0	0	0	0	0	0	0	0	0	0	0	0	0	0	0	0	0
MG: PyrE-like protein OS=Methanothermobacter thermautotrophicus (strain ATCC 29096 / DSM 1053 / JCM 10044 / NBRC 100330 / Delta H) GN=MTH_876 PE=3 SV=1 [O26962] Score: 259.0	K00762	-	Archaea	Unknown	Euryarchaeota	Methanobacteria	Methanobacteriales	Methanobacteriaceae	Methanothermobacter	Methanothermobacter thermautotrophicus	-	0	0	0	0	0	0	0	0	0	0	0	0	0	0	0	0	0	0	0	0	0	0	0	0	0	0	0	0	0	0	0	0	0	0	0	0	0	0
NIKR2_METTH Putative nickel-responsive regulator 2 OS=Methanothermobacter thermautotrophicus (strain ATCC 29096 / DSM 1053 / JCM 10044 / NBRC 100330 / Delta H) GN=MTH_739 PE=3 SV=1	K07722	-	Archaea	Unknown	Euryarchaeota	Methanobacteria	Methanobacteriales	Methanobacteriaceae	Methanothermobacter	Methanothermobacter thermautotrophicus	-	0	0	0	0	0	0	0	0	0	0	0	0	0	0	0	0	0	0	0	0	0	0	0	0	0	0	0	0	0	0	0	0	0	0	0	0	0	0
MG: Translation initiation factor 5A OS=Methanothermobacter thermautotrophicus (strain ATCC 29096 / DSM 1053 / JCM 10044 / NBRC 100330 / Delta H) GN=eif5a PE=3 SV=1 [O26955] Score: 209.0	-	-	Archaea	Unknown	Euryarchaeota	Methanobacteria	Methanobacteriales	Methanobacteriaceae	Methanothermobacter	Methanothermobacter thermautotrophicus	-	0	0	0	0	0	0	0	0	0	0	0	0	0	0	0	0	0	0	0	0	0	0	0	0	0	0	0	0	0	0	0	0	0	0	0	0	0	0
MG: 50S ribosomal protein L23P OS=Methanothermobacter thermautotrophicus (strain ATCC 29096 / DSM 1053 / JCM 10044 / NBRC 100330 / Delta H) GN=rpl23p PE=3 SV=2 [O26112] Score: 117.0	-	-	Archaea	Unknown	Euryarchaeota	Methanobacteria	Methanobacteriales	Methanobacteriaceae	Methanothermobacter	Methanothermobacter thermautotrophicus	-	0	0	0	0	0	0	0	0	0	0	0	0	0	0	0	0	0	0	0	0	0	0	0	0	0	0	0	0	0	0	0	0	0	0	0	0	0	0
MG: 50S ribosomal protein L30e OS=Methanothermobacter thermautotrophicus (strain ATCC 29096 / DSM 1053 / JCM 10044 / NBRC 100330 / Delta H) GN=rpl30e PE=3 SV=1 [O27127] Score: 152.0	-	-	Archaea	Unknown	Euryarchaeota	Methanobacteria	Methanobacteriales	Methanobacteriaceae	Methanothermobacter	Methanothermobacter thermautotrophicus	-	0	0	0	0	0	0	0	0	0	0	0	0	0	0	0	0	0	0	0	0	0	0	0	0	0	0	0	0	0	0	0	0	0	0	0	0	0	0
MG: Enolase OS=Methanothermobacter thermautotrophicus (strain ATCC 29096 / DSM 1053 / JCM 10044 / NBRC 100330 / Delta H) GN=eno PE=3 SV=1 [O26149] Score: 674.0	K01689	4.2.1.11	Archaea	Unknown	Euryarchaeota	Methanobacteria	Methanobacteriales	Methanobacteriaceae	Methanothermobacter	Methanothermobacter thermautotrophicus	-	0	0	0	0	0	0	0	0	0	0	0	0	0	0	0	0	0	0	0	0	0	0	0	0	0	0	0	0	0	0	0	0	0	0	0	0	0	0
MG: Exosome complex component Rrp42 OS=Methanothermobacter thermautotrophicus (strain ATCC 29096 / DSM 1053 / JCM 10044 / NBRC 100330 / Delta H) GN=rrp42 PE=1 SV=1 [O26778] Score: 340.0	-	-	Archaea	Unknown	Euryarchaeota	Methanobacteria	Methanobacteriales	Methanobacteriaceae	Methanothermobacter	Methanothermobacter thermautotrophicus	-	0	0	0	0	0	0	0	0	0	0	0	0	0	0	0	0	0	0	0	0	0	0	0	0	0	0	0	0	0	0	0	0	0	0	0	0	0	0
MG: Adenylate kinase OS=Methanothermobacter thermautotrophicus (strain ATCC 29096 / DSM 1053 / JCM 10044 / NBRC 100330 / Delta H) GN=adkA PE=3 SV=2 [O26135] Score: 274.0	K00939	2.7.4.3	Archaea	Unknown	Euryarchaeota	Methanobacteria	Methanobacteriales	Methanobacteriaceae	Methanothermobacter	Methanothermobacter thermautotrophicus	-	0	0	0	0	0	0	0	0	0	0	0	0	0	0	0	0	0	0	0	0	0	0	0	0	0	0	0	0	0	0	0	0	0	0	0	0	0	0
MG: Glycerol-3-phosphate dehydrogenase [NAD(P)+] OS=Methanothermobacter thermautotrophicus (strain ATCC 29096 / DSM 1053 / JCM 10044 / NBRC 100330 / Delta H) GN=gpsA PE=3 SV=1 [O26468] Score: 232.0	K00057	1.1.1.94	Archaea	Unknown	Euryarchaeota	Methanobacteria	Methanobacteriales	Methanobacteriaceae	Methanothermobacter	Methanothermobacter thermautotrophicus	-	0	0	0	0	0	0	0	0	0	0	0	0	0	0	0	0	0	0	0	0	0	0	0	0	0	0	0	0	0	0	0	0	0	0	0	0	0	0
MG: Translation initiation factor 6 OS=Methanothermobacter thermautotrophicus (strain ATCC 29096 / DSM 1053 / JCM 10044 / NBRC 100330 / Delta H) GN=eif6 PE=1 SV=1 [O27648] Score: 261.0	-	-	Archaea	Unknown	Euryarchaeota	Methanobacteria	Methanobacteriales	Methanobacteriaceae	Methanothermobacter	Methanothermobacter thermautotrophicus	-	0	0	0	0	0	0	0	0	0	0	0	0	0	0	0	0	0	0	0	0	0	0	0	0	0	0	0	0	0	0	0	0	0	0	0	0	0	0
MG: V-type ATP synthase subunit E OS=Methanothermobacter thermautotrophicus (strain ATCC 29096 / DSM 1053 / JCM 10044 / NBRC 100330 / Delta H) GN=atpE PE=3 SV=1 [O27039] Score: 219.0	-	-	Archaea	Unknown	Euryarchaeota	Methanobacteria	Methanobacteriales	Methanobacteriaceae	Methanothermobacter	Methanothermobacter thermautotrophicus	-	0	0	0	0	0	0	0	0	0	0	0	0	0	0	0	0	0	0	0	0	0	0	0	0	0	0	0	0	0	0	0	0	0	0	0	0	0	0
MG: Tetrahydromethanopterin S-methyltransferase subunit H OS=Methanothermobacter marburgensis (strain DSM 2133 / 14651 / NBRC 100331 / OCM 82 / Marburg) GN=mtrH PE=1 SV=2 [P80187] Score: 511.0	K00584	2.1.1.86	Archaea	Unknown	Euryarchaeota	Methanobacteria	Methanobacteriales	Methanobacteriaceae	Methanothermobacter	Unknown	-	31	27	2	0	2	3	3	10	2	1	1	0	0	0	0	0	0	0	0	0	1	5	0	0	0	0	0	0	8	7	5	5	5	2	4	4	1	2
MG: F420-non-reducing hydrogenase subunit G OS=Methanothermobacter marburgensis (strain DSM 2133 / 14651 / NBRC 100331 / OCM 82 / Marburg) GN=mvhG PE=1 SV=2 [P60239] Score: 461.0	K14128	1.12.99.-	Archaea	Unknown	Euryarchaeota	Methanobacteria	Methanobacteriales	Methanobacteriaceae	Methanothermobacter	Unknown	-	2	5	0	0	0	0	16	12	0	0	0	0	1	2	1	0	5	0	0	0	0	0	0	0	0	0	0	0	4	3	0	0	0	1	0	0	0	0
MG: F420-dependent NADP reductase OS=Methanothermobacter marburgensis (strain DSM 2133 / 14651 / NBRC 100331 / OCM 82 / Marburg) GN=fno PE=1 SV=1 [D9PVP5] Score: 118.0	K06988	1.5.1.40	Archaea	Unknown	Euryarchaeota	Methanobacteria	Methanobacteriales	Methanobacteriaceae	Methanothermobacter	Unknown	-	0	4	8	6	29	33	35	31	38	2	18	26	42	29	70	70	61	4	52	56	2	9	32	17	2	70	76	59	3	3	40	53	9	5	3	5	98	97
HMD_METWO 5,10-methenyltetrahydromethanopterin hydrogenase (Fragment) OS=Methanothermobacter wolfeii GN=hmd PE=1 SV=1	-	1.12.98.2	Archaea	Unknown	Euryarchaeota	Methanobacteria	Methanobacteriales	Methanobacteriaceae	Methanothermobacter	Unknown	-	4	4	0	0	0	0	0	0	0	0	0	0	0	0	0	0	0	0	0	0	0	0	0	0	0	0	0	0	0	0	0	0	0	0	0	0	0	0
MG: Ketoisovalerate oxidoreductase subunit VorC OS=Methanothermobacter marburgensis (strain DSM 2133 / 14651 / NBRC 100331 / OCM 82 / Marburg) GN=vorC PE=1 SV=3 [P80909] Score: 53.9	K00188	1.2.7.7	Archaea	Unknown	Euryarchaeota	Methanobacteria	Methanobacteriales	Methanobacteriaceae	Methanothermobacter	Unknown	-	0	0	0	0	0	0	1	2	0	0	0	0	0	0	0	0	0	0	0	0	2	2	0	0	0	0	0	0	0	0	0	0	0	0	0	0	0	0
MG: Uncharacterized protein Mfer_0534 OS=Methanothermus fervidus (strain ATCC 43054 / DSM 2088 / JCM 10308 / V24 S) GN=Mfer_0534 PE=3 SV=2 [P56509] Score: 659.0	K10716	-	Archaea	Unknown	Euryarchaeota	Methanobacteria	Methanobacteriales	Methanothermaceae	Methanothermus	Methanothermus fervidus	-	0	0	0	0	0	0	0	0	0	0	0	0	1	0	0	0	0	0	0	0	0	0	0	0	0	0	0	0	0	0	0	0	0	0	0	0	0	0
MG: Uncharacterized protein MJ0516 OS=Methanocaldococcus jannaschii (strain ATCC 43067 / DSM 2661 / JAL-1 / JCM 10045 / NBRC 100440) GN=MJ0516 PE=3 SV=2 [Q57936] Score: 175.0	K14105	-	Archaea	Unknown	Euryarchaeota	Methanococci	Methanococcales	Methanocaldococcaceae	Methanocaldococcus	Methanocaldococcus jannaschii	-	1	0	0	0	0	0	0	0	0	0	0	0	0	0	0	0	0	0	0	0	0	0	0	0	1	0	0	0	0	0	0	0	0	0	0	0	0	0
MG: Uncharacterized protein MJ1304 OS=Methanocaldococcus jannaschii (strain ATCC 43067 / DSM 2661 / JAL-1 / JCM 10045 / NBRC 100440) GN=MJ1304 PE=3 SV=1 [Q58700] Score: 50.1	-	-	Archaea	Unknown	Euryarchaeota	Methanococci	Methanococcales	Methanocaldococcaceae	Methanocaldococcus	Methanocaldococcus jannaschii	-	4	2	0	0	0	0	0	0	0	0	0	0	0	0	0	0	0	0	0	0	0	0	0	0	0	0	0	0	0	0	0	0	0	0	0	0	0	0
MG: Polyferredoxin protein FwdG OS=Methanocaldococcus jannaschii (strain ATCC 43067 / DSM 2661 / JAL-1 / JCM 10045 / NBRC 100440) GN=fwdG PE=3 SV=1 [Q58567] Score: 64.3	K11260	-	Archaea	Unknown	Euryarchaeota	Methanococci	Methanococcales	Methanocaldococcaceae	Methanocaldococcus	Methanocaldococcus jannaschii	-	2	0	0	0	0	0	0	0	0	0	0	0	0	1	0	0	2	0	0	0	0	0	0	0	0	2	0	0	0	0	0	0	0	0	0	0	0	0
MG: Uncharacterized protein MJ0105 OS=Methanocaldococcus jannaschii (strain ATCC 43067 / DSM 2661 / JAL-1 / JCM 10045 / NBRC 100440) GN=MJ0105 PE=4 SV=1 [Q57569] Score: 45.8	K09135	-	Archaea	Unknown	Euryarchaeota	Methanococci	Methanococcales	Methanocaldococcaceae	Methanocaldococcus	Methanocaldococcus jannaschii	-	3	0	0	0	6	4	2	6	1	4	2	3	4	2	3	5	4	2	0	0	0	0	0	0	2	1	0	3	2	0	0	0	0	0	2	0	4	2
MG: Uncharacterized adenine-specific methylase MJECS02 OS=Methanocaldococcus jannaschii (strain ATCC 43067 / DSM 2661 / JAL-1 / JCM 10045 / NBRC 100440) GN=MJECS02 PE=3 SV=1 [Q60301] Score: 55.1	-	2.1.1.72	Archaea	Unknown	Euryarchaeota	Methanococci	Methanococcales	Methanocaldococcaceae	Methanocaldococcus	Methanocaldococcus jannaschii	-	1	0	0	0	0	1	0	1	0	0	0	0	11	2	6	2	2	5	4	1	0	0	0	0	0	1	0	0	0	0	0	1	0	0	0	0	1	0
MG: Uncharacterized protein MJ1181 OS=Methanocaldococcus jannaschii (strain ATCC 43067 / DSM 2661 / JAL-1 / JCM 10045 / NBRC 100440) GN=MJ1181 PE=4 SV=1 [Q58581] Score: 84.3	K02051	-	Archaea	Unknown	Euryarchaeota	Methanococci	Methanococcales	Methanocaldococcaceae	Methanocaldococcus	Methanocaldococcus jannaschii	-	4	6	1	1	0	0	0	0	0	0	0	0	0	1	4	0	0	0	0	0	0	0	0	0	0	1	0	0	2	3	9	3	0	0	0	0	0	0
MG: Uncharacterized protein MJ0007 OS=Methanocaldococcus jannaschii (strain ATCC 43067 / DSM 2661 / JAL-1 / JCM 10045 / NBRC 100440) GN=MJ0007 PE=3 SV=1 [Q60318] Score: 212.0	-	-	Archaea	Unknown	Euryarchaeota	Methanococci	Methanococcales	Methanocaldococcaceae	Methanocaldococcus	Methanocaldococcus jannaschii	-	85	95	5	8	0	0	0	0	0	0	0	0	9	7	3	6	11	2	0	1	0	0	0	0	0	0	0	0	2	23	21	32	0	0	0	0	0	0
MG: Uncharacterized protein MJ0800 OS=Methanocaldococcus jannaschii (strain ATCC 43067 / DSM 2661 / JAL-1 / JCM 10045 / NBRC 100440) GN=MJ0800 PE=4 SV=1 [Q58210] Score: 85.1	-	-	Archaea	Unknown	Euryarchaeota	Methanococci	Methanococcales	Methanocaldococcaceae	Methanocaldococcus	Methanocaldococcus jannaschii	-	3	1	0	0	0	0	0	0	0	0	0	0	0	0	0	0	0	0	0	0	0	0	0	0	0	0	0	0	0	0	0	0	0	0	0	0	0	0
MG: Uncharacterized HTH-type transcriptional regulator MJ0300 OS=Methanocaldococcus jannaschii (strain ATCC 43067 / DSM 2661 / JAL-1 / JCM 10045 / NBRC 100440) GN=MJ0300 PE=3 SV=1 [Q57748] Score: 171.0	-	-	Archaea	Unknown	Euryarchaeota	Methanococci	Methanococcales	Methanocaldococcaceae	Methanocaldococcus	Methanocaldococcus jannaschii	-	4	3	2	2	0	0	0	0	0	0	1	0	0	0	0	0	0	0	0	0	0	0	0	0	0	0	0	0	0	0	0	0	0	0	0	0	0	0
MG: Bifunctional thiamine biosynthesis protein ThiDN OS=Methanocaldococcus jannaschii (strain ATCC 43067 / DSM 2661 / JAL-1 / JCM 10045 / NBRC 100440) GN=thiDN PE=1 SV=2 [Q57688] Score: 150.0	K00941	2.7.1.49|2.7.4.7|2.5.1.3	Archaea	Unknown	Euryarchaeota	Methanococci	Methanococcales	Methanocaldococcaceae	Methanocaldococcus	Methanocaldococcus jannaschii	-	1	0	0	0	1	0	0	0	5	2	2	4	13	6	14	5	13	8	2	9	0	1	0	0	9	3	4	1	3	2	0	0	0	0	2	0	0	1
MG: Uncharacterized protein MJ0504 OS=Methanocaldococcus jannaschii (strain ATCC 43067 / DSM 2661 / JAL-1 / JCM 10045 / NBRC 100440) GN=MJ0504 PE=4 SV=1 [Q57927] Score: 157.0	K09126	-	Archaea	Unknown	Euryarchaeota	Methanococci	Methanococcales	Methanocaldococcaceae	Methanocaldococcus	Methanocaldococcus jannaschii	-	10	6	9	5	26	21	9	5	10	7	15	10	28	19	25	15	20	15	7	14	1	1	0	0	26	25	20	13	20	14	12	12	8	8	17	11	13	7
MG: Uncharacterized protein MJ1432 OS=Methanocaldococcus jannaschii (strain ATCC 43067 / DSM 2661 / JAL-1 / JCM 10045 / NBRC 100440) GN=MJ1432 PE=3 SV=1 [Q58827] Score: 56.2	K07575	-	Archaea	Unknown	Euryarchaeota	Methanococci	Methanococcales	Methanocaldococcaceae	Methanocaldococcus	Methanocaldococcus jannaschii	-	1	0	0	0	0	0	0	0	0	0	0	0	4	0	0	0	4	0	0	0	0	0	0	0	0	0	0	0	0	0	0	0	0	0	0	0	0	0
MG: Uncharacterized protein MJ1516 OS=Methanocaldococcus jannaschii (strain ATCC 43067 / DSM 2661 / JAL-1 / JCM 10045 / NBRC 100440) GN=MJ1516 PE=4 SV=1 [Q58911] Score: 42.4	-	-	Archaea	Unknown	Euryarchaeota	Methanococci	Methanococcales	Methanocaldococcaceae	Methanocaldococcus	Methanocaldococcus jannaschii	-	21	8	3	3	0	0	0	0	0	0	0	0	0	0	0	0	0	0	0	0	0	1	0	0	1	2	3	2	0	1	0	1	0	0	0	0	0	3
MG: Uncharacterized protein MJ0404 OS=Methanocaldococcus jannaschii (strain ATCC 43067 / DSM 2661 / JAL-1 / JCM 10045 / NBRC 100440) GN=MJ0404 PE=4 SV=1 [Q57847] Score: 196.0	-	-	Archaea	Unknown	Euryarchaeota	Methanococci	Methanococcales	Methanocaldococcaceae	Methanocaldococcus	Methanocaldococcus jannaschii	-	1	1	0	0	12	7	0	2	15	5	5	1	0	0	3	10	0	1	0	0	0	1	0	0	17	8	6	4	0	0	0	0	0	0	0	3	0	0
MG: Uncharacterized protein MJ0360 OS=Methanocaldococcus jannaschii (strain ATCC 43067 / DSM 2661 / JAL-1 / JCM 10045 / NBRC 100440) GN=MJ0360 PE=4 SV=1 [Q57806] Score: 72.8	-	-	Archaea	Unknown	Euryarchaeota	Methanococci	Methanococcales	Methanocaldococcaceae	Methanocaldococcus	Methanocaldococcus jannaschii	-	5	1	3	6	4	0	0	3	0	0	0	0	0	0	0	0	0	0	0	0	0	0	0	0	0	0	0	0	0	0	0	0	0	0	0	0	0	0
MG: Putative permease MJ0326 OS=Methanocaldococcus jannaschii (strain ATCC 43067 / DSM 2661 / JAL-1 / JCM 10045 / NBRC 100440) GN=MJ0326 PE=3 SV=1 [Q57772] Score: 320.0	K06901	-	Archaea	Unknown	Euryarchaeota	Methanococci	Methanococcales	Methanocaldococcaceae	Methanocaldococcus	Methanocaldococcus jannaschii	-	20	19	13	10	2	7	5	10	29	22	16	24	35	18	20	15	15	21	30	24	14	17	10	5	16	10	17	23	13	26	14	16	29	26	16	29	5	12
MG: Uncharacterized protein MJ0660 OS=Methanocaldococcus jannaschii (strain ATCC 43067 / DSM 2661 / JAL-1 / JCM 10045 / NBRC 100440) GN=MJ0660 PE=3 SV=1 [Q58074] Score: 83.6	-	-	Archaea	Unknown	Euryarchaeota	Methanococci	Methanococcales	Methanocaldococcaceae	Methanocaldococcus	Methanocaldococcus jannaschii	-	13	15	1	0	91	93	64	60	55	47	52	54	0	0	0	0	0	0	0	0	28	31	25	37	0	0	0	0	0	0	0	0	23	18	39	27	0	0
MG: Putative FKBP-type peptidyl-prolyl cis-trans isomerase MJ0825 OS=Methanocaldococcus jannaschii (strain ATCC 43067 / DSM 2661 / JAL-1 / JCM 10045 / NBRC 100440) GN=MJ0825 PE=1 SV=2 [Q58235] Score: 145.0	K03775	5.2.1.8	Archaea	Unknown	Euryarchaeota	Methanococci	Methanococcales	Methanocaldococcaceae	Methanocaldococcus	Methanocaldococcus jannaschii	-	7	6	0	0	31	41	16	13	18	17	14	12	2	7	5	2	4	4	5	4	0	0	0	0	3	1	0	0	3	0	0	0	0	3	0	0	3	1
Y224_METJA Uncharacterized protein MJ0224 OS=Methanocaldococcus jannaschii (strain ATCC 43067 / DSM 2661 / JAL-1 / JCM 10045 / NBRC 100440) GN=MJ0224 PE=4 SV=1	K09725	-	Archaea	Unknown	Euryarchaeota	Methanococci	Methanococcales	Methanocaldococcaceae	Methanocaldococcus	Methanocaldococcus jannaschii	-	3	0	1	0	0	0	1	0	1	1	2	2	1	6	0	0	2	3	0	0	0	1	0	0	0	0	0	0	0	0	0	0	0	0	0	0	0	0
MG: Putative molybdopterin biosynthesis protein MJ0886 OS=Methanocaldococcus jannaschii (strain ATCC 43067 / DSM 2661 / JAL-1 / JCM 10045 / NBRC 100440) GN=MJ0886 PE=3 SV=1 [Q58296] Score: 109.0	K03750|K07219	-	Archaea	Unknown	Euryarchaeota	Methanococci	Methanococcales	Methanocaldococcaceae	Methanocaldococcus	Methanocaldococcus jannaschii	-	1	1	0	0	1	0	0	0	0	0	0	1	4	0	4	0	2	0	0	0	0	0	0	0	0	0	0	0	0	0	0	0	0	0	1	0	0	0
MG: Uncharacterized protein MJ1198 OS=Methanocaldococcus jannaschii (strain ATCC 43067 / DSM 2661 / JAL-1 / JCM 10045 / NBRC 100440) GN=MJ1198 PE=1 SV=1 [Q58598] Score: 62.4	K07463	-	Archaea	Unknown	Euryarchaeota	Methanococci	Methanococcales	Methanocaldococcaceae	Methanocaldococcus	Methanocaldococcus jannaschii	-	2	6	0	0	0	0	0	0	0	0	0	2	0	0	2	0	0	0	0	0	0	0	0	0	0	2	0	1	0	0	1	3	0	0	0	0	0	0
MG: Protein FwdA OS=Methanocaldococcus jannaschii (strain ATCC 43067 / DSM 2661 / JAL-1 / JCM 10045 / NBRC 100440) GN=fwdA PE=3 SV=1 [Q58569] Score: 623.0	K00200	-	Archaea	Unknown	Euryarchaeota	Methanococci	Methanococcales	Methanocaldococcaceae	Methanocaldococcus	Methanocaldococcus jannaschii	-	130	104	12	3	60	69	59	90	36	39	37	41	47	27	22	16	36	39	7	11	17	34	16	22	79	73	74	65	49	24	22	24	1	2	40	25	16	30
MG: Uncharacterized protein MJ0004 OS=Methanocaldococcus jannaschii (strain ATCC 43067 / DSM 2661 / JAL-1 / JCM 10045 / NBRC 100440) GN=MJ0004 PE=4 SV=1 [Q60315] Score: 84.7	-	-	Archaea	Unknown	Euryarchaeota	Methanococci	Methanococcales	Methanocaldococcaceae	Methanocaldococcus	Methanocaldococcus jannaschii	-	2	0	8	2	2	7	23	11	4	11	13	17	19	19	18	20	25	22	27	5	17	18	8	5	4	6	3	4	10	16	10	6	11	5	5	8	2	10
MG: Modification methylase MjaI OS=Methanocaldococcus jannaschii (strain ATCC 43067 / DSM 2661 / JAL-1 / JCM 10045 / NBRC 100440) GN=mjaIM PE=1 SV=1 [Q58392] Score: 106.0	K00590	2.1.1.113	Archaea	Unknown	Euryarchaeota	Methanococci	Methanococcales	Methanocaldococcaceae	Methanocaldococcus	Methanocaldococcus jannaschii	-	1	0	0	0	0	0	0	0	0	0	0	0	0	0	0	0	0	0	0	0	0	1	0	0	0	0	0	0	0	0	0	0	0	0	0	0	0	0
MG: Uncharacterized lipoprotein MJ0085 OS=Methanocaldococcus jannaschii (strain ATCC 43067 / DSM 2661 / JAL-1 / JCM 10045 / NBRC 100440) GN=MJ0085 PE=3 SV=1 [Q57550] Score: 363.0	K02016	-	Archaea	Unknown	Euryarchaeota	Methanococci	Methanococcales	Methanocaldococcaceae	Methanocaldococcus	Methanocaldococcus jannaschii	-	57	54	0	0	94	110	121	91	33	34	82	9	25	25	26	2	20	14	14	9	0	0	0	0	10	7	7	6	143	156	122	131	1	0	11	10	85	124
MG: Uncharacterized protein MJ1222 OS=Methanocaldococcus jannaschii (strain ATCC 43067 / DSM 2661 / JAL-1 / JCM 10045 / NBRC 100440) GN=MJ1222 PE=4 SV=1 [Q58619] Score: 97.4	-	-	Archaea	Unknown	Euryarchaeota	Methanococci	Methanococcales	Methanocaldococcaceae	Methanocaldococcus	Methanocaldococcus jannaschii	-	1	0	0	0	0	0	2	1	0	0	0	0	0	1	0	0	1	0	1	0	1	0	0	0	0	0	0	0	0	1	0	0	0	0	1	1	0	0
MG: Putative L(+)-tartrate dehydratase subunit alpha OS=Methanocaldococcus jannaschii (strain ATCC 43067 / DSM 2661 / JAL-1 / JCM 10045 / NBRC 100440) GN=MJ1294 PE=3 SV=1 [Q58690] Score: 229.0	K01677	4.2.1.32	Archaea	Unknown	Euryarchaeota	Methanococci	Methanococcales	Methanocaldococcaceae	Methanocaldococcus	Methanocaldococcus jannaschii	-	6	4	1	0	26	35	17	30	15	21	24	15	10	12	17	11	11	11	6	15	10	21	59	54	0	0	0	3	6	2	0	0	0	0	0	1	0	0
MG: Uncharacterized protein MJ1232 OS=Methanocaldococcus jannaschii (strain ATCC 43067 / DSM 2661 / JAL-1 / JCM 10045 / NBRC 100440) GN=MJ1232 PE=3 SV=1 [Q58629] Score: 203.0	K07744	-	Archaea	Unknown	Euryarchaeota	Methanococci	Methanococcales	Methanocaldococcaceae	Methanocaldococcus	Methanocaldococcus jannaschii	-	1	0	1	2	59	56	58	51	89	59	23	46	15	20	24	8	26	16	0	13	4	14	0	2	9	17	8	4	1	1	0	1	28	14	19	29	0	0
MG: Uncharacterized protein MJ0137 OS=Methanocaldococcus jannaschii (strain ATCC 43067 / DSM 2661 / JAL-1 / JCM 10045 / NBRC 100440) GN=MJ0137 PE=4 SV=1 [Q57601] Score: 244.0	-	-	Archaea	Unknown	Euryarchaeota	Methanococci	Methanococcales	Methanocaldococcaceae	Methanocaldococcus	Methanocaldococcus jannaschii	-	2	2	1	0	0	0	0	1	15	5	3	4	2	0	5	8	1	4	15	6	0	2	0	0	6	3	0	0	0	0	0	0	2	0	2	0	0	0
MG: Putative rubrerythrin OS=Methanocaldococcus jannaschii (strain ATCC 43067 / DSM 2661 / JAL-1 / JCM 10045 / NBRC 100440) GN=MJ0734 PE=3 SV=1 [Q58144] Score: 253.0	-	-	Archaea	Unknown	Euryarchaeota	Methanococci	Methanococcales	Methanocaldococcaceae	Methanocaldococcus	Methanocaldococcus jannaschii	-	14	13	0	0	16	7	11	9	1	1	0	1	0	0	0	0	0	0	0	0	1	3	0	0	0	0	0	0	2	0	1	6	2	2	3	3	0	0
MG: CRISPR-associated endoribonuclease Cas6 1 OS=Methanocaldococcus jannaschii (strain ATCC 43067 / DSM 2661 / JAL-1 / JCM 10045 / NBRC 100440) GN=cas6a PE=3 SV=1 [Q57820] Score: 80.1	K19091	3.1.-.-	Archaea	Unknown	Euryarchaeota	Methanococci	Methanococcales	Methanocaldococcaceae	Methanocaldococcus	Methanocaldococcus jannaschii	-	1	1	0	0	0	0	0	0	0	0	0	0	2	8	7	0	3	3	0	6	0	0	0	0	0	0	0	0	10	19	10	11	0	0	0	0	0	0
Y169_METJA Uncharacterized ATP-binding protein MJ0169 OS=Methanocaldococcus jannaschii (strain ATCC 43067 / DSM 2661 / JAL-1 / JCM 10045 / NBRC 100440) GN=MJ0169 PE=4 SV=1	K03609	-	Archaea	Unknown	Euryarchaeota	Methanococci	Methanococcales	Methanocaldococcaceae	Methanocaldococcus	Methanocaldococcus jannaschii	-	1	0	0	0	0	0	0	0	0	0	0	0	0	0	0	0	0	0	0	0	0	0	0	0	0	0	0	0	0	0	0	0	0	0	0	0	0	0
MG: Uncharacterized protein MJ0524 OS=Methanocaldococcus jannaschii (strain ATCC 43067 / DSM 2661 / JAL-1 / JCM 10045 / NBRC 100440) GN=MJ0524 PE=4 SV=1 [Q57944] Score: 117.0	K14097	-	Archaea	Unknown	Euryarchaeota	Methanococci	Methanococcales	Methanocaldococcaceae	Methanocaldococcus	Methanocaldococcus jannaschii	-	1	2	0	0	0	0	0	0	0	0	0	0	0	0	0	0	0	0	0	0	0	0	0	0	0	0	0	0	0	0	0	0	0	0	0	0	0	0
MG: Universal stress protein MJ0577 OS=Methanocaldococcus jannaschii (strain ATCC 43067 / DSM 2661 / JAL-1 / JCM 10045 / NBRC 100440) GN=MJ0577 PE=1 SV=1 [Q57997] Score: 47.4	-	-	Archaea	Unknown	Euryarchaeota	Methanococci	Methanococcales	Methanocaldococcaceae	Methanocaldococcus	Methanocaldococcus jannaschii	-	13	8	1	0	16	6	2	3	18	14	6	2	2	0	0	0	8	1	0	0	22	10	4	22	2	5	0	1	0	0	0	0	0	0	0	0	0	0
MG: UPF0033 protein MJ0990 OS=Methanocaldococcus jannaschii (strain ATCC 43067 / DSM 2661 / JAL-1 / JCM 10045 / NBRC 100440) GN=MJ0990 PE=3 SV=1 [Q58397] Score: 42.4	K04085	-	Archaea	Unknown	Euryarchaeota	Methanococci	Methanococcales	Methanocaldococcaceae	Methanocaldococcus	Methanocaldococcus jannaschii	-	1	0	0	0	4	6	2	3	0	0	0	0	8	9	12	18	9	7	0	10	0	0	0	0	0	0	0	0	3	4	1	0	0	0	0	0	0	0
MG: Uncharacterized protein MJ1673 OS=Methanocaldococcus jannaschii (strain ATCC 43067 / DSM 2661 / JAL-1 / JCM 10045 / NBRC 100440) GN=MJ1673 PE=4 SV=1 [Q59067] Score: 139.0	-	-	Archaea	Unknown	Euryarchaeota	Methanococci	Methanococcales	Methanocaldococcaceae	Methanocaldococcus	Methanocaldococcus jannaschii	-	1	0	0	0	0	0	0	0	0	0	0	0	0	0	0	0	0	0	0	0	0	0	0	0	0	0	0	0	1	0	0	0	0	0	0	0	0	0
MG: Uncharacterized protein MJ1441 OS=Methanocaldococcus jannaschii (strain ATCC 43067 / DSM 2661 / JAL-1 / JCM 10045 / NBRC 100440) GN=MJ1441 PE=3 SV=1 [Q58836] Score: 733.0	K02230	-	Archaea	Unknown	Euryarchaeota	Methanococci	Methanococcales	Methanocaldococcaceae	Methanocaldococcus	Methanocaldococcus jannaschii	-	1	0	1	0	0	0	0	0	0	0	0	0	0	0	0	0	0	0	0	0	0	0	0	0	0	0	0	0	0	0	0	0	0	0	0	0	0	0
MCRY_METJA Methyl-coenzyme M reductase II subunit beta OS=Methanocaldococcus jannaschii (strain ATCC 43067 / DSM 2661 / JAL-1 / JCM 10045 / NBRC 100440) GN=mrtB PE=3 SV=2	K00401	2.8.4.1	Archaea	Unknown	Euryarchaeota	Methanococci	Methanococcales	Methanocaldococcaceae	Methanocaldococcus	Methanocaldococcus jannaschii	-	2	1	5	1	2	1	3	1	0	0	0	0	0	0	0	0	0	0	0	0	0	0	0	0	0	0	0	0	0	0	0	0	0	0	0	0	0	0
MG: Uncharacterized protein MJ1470 OS=Methanocaldococcus jannaschii (strain ATCC 43067 / DSM 2661 / JAL-1 / JCM 10045 / NBRC 100440) GN=MJ1470 PE=4 SV=1 [Q58865] Score: 76.3	-	-	Archaea	Unknown	Euryarchaeota	Methanococci	Methanococcales	Methanocaldococcaceae	Methanocaldococcus	Methanocaldococcus jannaschii	-	0	3	0	0	0	0	0	0	0	0	0	0	0	0	0	0	0	0	0	0	0	0	0	0	0	0	0	0	0	0	0	0	0	0	0	0	0	0
MG: CRISPR-associated protein Cas10/Csm1 OS=Methanocaldococcus jannaschii (strain ATCC 43067 / DSM 2661 / JAL-1 / JCM 10045 / NBRC 100440) GN=cas10 PE=3 SV=1 [Q59066] Score: 345.0	K07016	-	Archaea	Unknown	Euryarchaeota	Methanococci	Methanococcales	Methanocaldococcaceae	Methanocaldococcus	Methanocaldococcus jannaschii	-	0	1	0	0	1	1	0	0	0	0	0	0	8	30	11	8	6	7	4	5	0	0	0	0	0	0	0	0	0	0	1	0	0	0	0	0	0	0
MG: Uncharacterized protein MJ0304 OS=Methanocaldococcus jannaschii (strain ATCC 43067 / DSM 2661 / JAL-1 / JCM 10045 / NBRC 100440) GN=MJ0304 PE=3 SV=1 [Q57752] Score: 130.0	-	-	Archaea	Unknown	Euryarchaeota	Methanococci	Methanococcales	Methanocaldococcaceae	Methanocaldococcus	Methanocaldococcus jannaschii	-	0	1	0	0	0	0	0	0	0	0	1	0	2	0	0	2	3	0	0	0	0	0	0	4	0	0	0	0	0	0	0	0	0	0	0	0	0	0
MG: Uncharacterized glycosyltransferase MJ1607 OS=Methanocaldococcus jannaschii (strain ATCC 43067 / DSM 2661 / JAL-1 / JCM 10045 / NBRC 100440) GN=MJ1607 PE=3 SV=1 [Q59002] Score: 115.0	-	2.4.-.-	Archaea	Unknown	Euryarchaeota	Methanococci	Methanococcales	Methanocaldococcaceae	Methanocaldococcus	Methanocaldococcus jannaschii	-	0	1	0	3	0	1	0	0	0	0	0	0	2	0	0	0	0	0	0	0	1	3	1	0	0	1	1	0	3	1	4	2	0	0	0	0	0	0
Y1615_METJA Uncharacterized protein MJ1615 OS=Methanocaldococcus jannaschii (strain ATCC 43067 / DSM 2661 / JAL-1 / JCM 10045 / NBRC 100440) GN=MJ1615 PE=4 SV=1	K09156	-	Archaea	Unknown	Euryarchaeota	Methanococci	Methanococcales	Methanocaldococcaceae	Methanocaldococcus	Methanocaldococcus jannaschii	-	0	1	0	0	0	0	0	0	0	0	0	0	0	0	0	0	0	0	0	0	0	0	0	0	0	0	0	0	0	0	0	0	0	0	0	0	0	0
MG: Uncharacterized ABC transporter ATP-binding protein MJ0412 OS=Methanocaldococcus jannaschii (strain ATCC 43067 / DSM 2661 / JAL-1 / JCM 10045 / NBRC 100440) GN=MJ0412 PE=3 SV=1 [Q57855] Score: 194.0	K02049	-	Archaea	Unknown	Euryarchaeota	Methanococci	Methanococcales	Methanocaldococcaceae	Methanocaldococcus	Methanocaldococcus jannaschii	-	0	1	1	0	1	0	3	2	0	0	0	2	3	0	0	0	0	0	0	0	0	1	5	2	0	0	1	0	0	0	1	0	0	0	1	0	0	0
MG: Uncharacterized protein MJ0795 OS=Methanocaldococcus jannaschii (strain ATCC 43067 / DSM 2661 / JAL-1 / JCM 10045 / NBRC 100440) GN=MJ0795 PE=4 SV=1 [Q58205] Score: 93.6	-	-	Archaea	Unknown	Euryarchaeota	Methanococci	Methanococcales	Methanocaldococcaceae	Methanocaldococcus	Methanocaldococcus jannaschii	-	0	4	0	0	0	0	0	0	0	0	0	0	0	0	0	0	0	0	0	0	0	0	0	0	0	0	0	0	0	0	0	0	0	0	0	0	0	0
MG: Uncharacterized protein MJ1350 OS=Methanocaldococcus jannaschii (strain ATCC 43067 / DSM 2661 / JAL-1 / JCM 10045 / NBRC 100440) GN=MJ1350 PE=3 SV=1 [Q58745] Score: 269.0	-	-	Archaea	Unknown	Euryarchaeota	Methanococci	Methanococcales	Methanocaldococcaceae	Methanocaldococcus	Methanocaldococcus jannaschii	-	0	1	0	0	4	5	8	13	4	2	0	2	0	2	4	0	4	2	2	0	0	2	0	0	1	1	0	0	6	6	1	5	0	1	1	1	0	0
MG: Putative type I restriction enzyme MjaXP M protein OS=Methanocaldococcus jannaschii (strain ATCC 43067 / DSM 2661 / JAL-1 / JCM 10045 / NBRC 100440) GN=MJECL42 PE=3 SV=1 [Q60297] Score: 131.0	K03427	2.1.1.72	Archaea	Unknown	Euryarchaeota	Methanococci	Methanococcales	Methanocaldococcaceae	Methanocaldococcus	Methanocaldococcus jannaschii	-	0	3	1	2	0	0	7	0	0	0	0	1	0	0	1	0	0	0	0	1	4	9	5	9	0	0	0	0	0	0	0	0	0	0	2	0	0	0
MG: Uncharacterized protein MJ0746 OS=Methanocaldococcus jannaschii (strain ATCC 43067 / DSM 2661 / JAL-1 / JCM 10045 / NBRC 100440) GN=MJ0746 PE=3 SV=1 [Q58156] Score: 160.0	K19824	-	Archaea	Unknown	Euryarchaeota	Methanococci	Methanococcales	Methanocaldococcaceae	Methanocaldococcus	Methanocaldococcus jannaschii	-	0	1	0	2	0	0	0	0	0	0	0	0	0	0	0	0	0	0	0	0	0	0	0	0	0	0	0	0	0	0	0	0	0	0	0	0	0	0
MG: Uncharacterized aminotransferase MJ0959 OS=Methanocaldococcus jannaschii (strain ATCC 43067 / DSM 2661 / JAL-1 / JCM 10045 / NBRC 100440) GN=MJ0959 PE=3 SV=1 [Q58369] Score: 321.0	-	2.6.1.-	Archaea	Unknown	Euryarchaeota	Methanococci	Methanococcales	Methanocaldococcaceae	Methanocaldococcus	Methanocaldococcus jannaschii	-	0	1	0	0	6	2	8	5	11	19	3	1	13	5	21	12	11	11	5	2	0	1	0	0	1	1	0	0	0	0	0	1	0	0	0	0	0	0
MG: Magnesium-chelatase subunit ChlI homolog OS=Methanocaldococcus jannaschii (strain ATCC 43067 / DSM 2661 / JAL-1 / JCM 10045 / NBRC 100440) GN=MJ0911 PE=3 SV=1 [Q58321] Score: 423.0	K03405	-	Archaea	Unknown	Euryarchaeota	Methanococci	Methanococcales	Methanocaldococcaceae	Methanocaldococcus	Methanocaldococcus jannaschii	-	0	1	0	0	0	0	0	0	0	0	0	0	0	0	0	0	0	0	0	0	0	0	0	0	0	0	0	0	0	0	0	0	0	0	0	1	0	1
MG: Uncharacterized sodium-dependent transporter MJ1319 OS=Methanocaldococcus jannaschii (strain ATCC 43067 / DSM 2661 / JAL-1 / JCM 10045 / NBRC 100440) GN=MJ1319 PE=3 SV=1 [Q58715] Score: 313.0	K03308	-	Archaea	Unknown	Euryarchaeota	Methanococci	Methanococcales	Methanocaldococcaceae	Methanocaldococcus	Methanocaldococcus jannaschii	-	0	0	1	1	0	0	2	1	2	3	2	3	2	1	3	1	0	2	0	0	0	0	0	0	0	0	2	1	0	0	0	0	2	1	2	1	0	0
Y1404_METJA Uncharacterized protein MJ1404 OS=Methanocaldococcus jannaschii (strain ATCC 43067 / DSM 2661 / JAL-1 / JCM 10045 / NBRC 100440) GN=MJ1404 PE=3 SV=1	-	-	Archaea	Unknown	Euryarchaeota	Methanococci	Methanococcales	Methanocaldococcaceae	Methanocaldococcus	Methanocaldococcus jannaschii	-	0	0	1	0	3	8	32	6	8	5	5	5	1	1	2	0	2	0	0	0	0	0	0	0	0	0	0	0	0	0	0	0	0	0	1	0	0	0
MG: Uncharacterized protein MJ1114 OS=Methanocaldococcus jannaschii (strain ATCC 43067 / DSM 2661 / JAL-1 / JCM 10045 / NBRC 100440) GN=MJ1114 PE=4 SV=3 [Q58514] Score: 164.0	-	-	Archaea	Unknown	Euryarchaeota	Methanococci	Methanococcales	Methanocaldococcaceae	Methanocaldococcus	Methanocaldococcus jannaschii	-	0	0	1	4	0	0	2	0	0	0	3	0	20	0	0	3	0	2	1	28	0	0	19	43	0	2	0	0	5	7	3	4	0	1	0	1	1	0
MG: Uncharacterized ABC transporter ATP-binding protein MJ0089 OS=Methanocaldococcus jannaschii (strain ATCC 43067 / DSM 2661 / JAL-1 / JCM 10045 / NBRC 100440) GN=MJ0089 PE=3 SV=1 [Q57554] Score: 249.0	K02013	-	Archaea	Unknown	Euryarchaeota	Methanococci	Methanococcales	Methanocaldococcaceae	Methanocaldococcus	Methanocaldococcus jannaschii	-	0	0	1	0	8	1	10	5	2	1	0	0	0	0	0	1	0	0	0	0	0	0	0	0	0	0	0	1	0	0	0	0	0	0	0	0	0	0
MG: Putative nitroreductase MJ1384 OS=Methanocaldococcus jannaschii (strain ATCC 43067 / DSM 2661 / JAL-1 / JCM 10045 / NBRC 100440) GN=MJ1384 PE=3 SV=1 [Q58779] Score: 66.6	-	1.-.-.-	Archaea	Unknown	Euryarchaeota	Methanococci	Methanococcales	Methanocaldococcaceae	Methanocaldococcus	Methanocaldococcus jannaschii	-	0	0	1	0	1	1	0	0	7	0	3	1	11	8	0	0	5	6	0	0	56	72	37	43	15	12	13	2	15	8	3	7	7	5	9	3	3	1
MG: Uncharacterized protein MJ0330 OS=Methanocaldococcus jannaschii (strain ATCC 43067 / DSM 2661 / JAL-1 / JCM 10045 / NBRC 100440) GN=MJ0330 PE=4 SV=1 [Q57776] Score: 53.1	-	-	Archaea	Unknown	Euryarchaeota	Methanococci	Methanococcales	Methanocaldococcaceae	Methanocaldococcus	Methanocaldococcus jannaschii	-	0	0	1	0	0	0	0	0	0	0	0	0	0	0	0	0	0	1	0	0	0	0	0	0	0	0	0	0	0	0	0	0	0	0	0	0	0	0
Y296_METJA Probable metallo-hydrolase MJ0296 OS=Methanocaldococcus jannaschii (strain ATCC 43067 / DSM 2661 / JAL-1 / JCM 10045 / NBRC 100440) GN=MJ0296 PE=3 SV=1	-	3.-.-.-	Archaea	Unknown	Euryarchaeota	Methanococci	Methanococcales	Methanocaldococcaceae	Methanocaldococcus	Methanocaldococcus jannaschii	-	0	0	1	1	0	0	0	0	0	0	0	0	0	1	0	0	0	0	0	0	0	0	0	0	0	0	0	0	0	0	0	0	0	0	0	0	0	0
MG: Uncharacterized protein MJ0066 OS=Methanocaldococcus jannaschii (strain ATCC 43067 / DSM 2661 / JAL-1 / JCM 10045 / NBRC 100440) GN=MJ0066 PE=3 SV=1 [Q60377] Score: 152.0	K00390	-	Archaea	Unknown	Euryarchaeota	Methanococci	Methanococcales	Methanocaldococcaceae	Methanocaldococcus	Methanocaldococcus jannaschii	-	0	0	2	0	0	0	1	2	0	0	0	0	0	0	0	1	0	0	0	0	0	0	2	0	0	0	0	0	0	0	0	0	0	0	0	0	0	0
MG: Uncharacterized adenine-specific methylase MJ1220 OS=Methanocaldococcus jannaschii (strain ATCC 43067 / DSM 2661 / JAL-1 / JCM 10045 / NBRC 100440) GN=MJ1220 PE=3 SV=1 [Q58617] Score: 91.7	K03427	2.1.1.72	Archaea	Unknown	Euryarchaeota	Methanococci	Methanococcales	Methanocaldococcaceae	Methanocaldococcus	Methanocaldococcus jannaschii	-	0	0	1	0	1	0	0	0	0	0	0	0	0	1	0	0	3	1	3	0	0	0	0	0	0	0	0	0	0	0	1	0	0	0	0	0	1	0
MG: Uncharacterized protein MJ1311 OS=Methanocaldococcus jannaschii (strain ATCC 43067 / DSM 2661 / JAL-1 / JCM 10045 / NBRC 100440) GN=MJ1311 PE=1 SV=1 [Q58707] Score: 112.0	-	-	Archaea	Unknown	Euryarchaeota	Methanococci	Methanococcales	Methanocaldococcaceae	Methanocaldococcus	Methanocaldococcus jannaschii	-	0	0	0	1	1	0	0	0	2	2	0	0	0	1	0	2	3	4	0	0	0	0	0	0	0	0	0	0	5	0	0	1	0	0	6	5	0	0
MG: Uncharacterized protease MJ0090 OS=Methanocaldococcus jannaschii (strain ATCC 43067 / DSM 2661 / JAL-1 / JCM 10045 / NBRC 100440) GN=MJ0090 PE=3 SV=1 [Q57555] Score: 180.0	K08303	3.4.-.-	Archaea	Unknown	Euryarchaeota	Methanococci	Methanococcales	Methanocaldococcaceae	Methanocaldococcus	Methanocaldococcus jannaschii	-	0	0	0	1	0	0	0	0	3	3	6	3	0	0	0	0	0	0	0	0	0	0	0	0	0	0	0	0	0	0	0	0	0	0	0	0	0	0
MG: Uncharacterized transporter MJ1031 OS=Methanocaldococcus jannaschii (strain ATCC 43067 / DSM 2661 / JAL-1 / JCM 10045 / NBRC 100440) GN=MJ1031 PE=3 SV=1 [Q58437] Score: 59.3	K07088	-	Archaea	Unknown	Euryarchaeota	Methanococci	Methanococcales	Methanocaldococcaceae	Methanocaldococcus	Methanocaldococcus jannaschii	-	0	0	0	0	1	0	0	0	0	0	0	0	0	0	0	0	0	0	1	0	0	0	0	0	0	0	0	0	0	0	0	0	0	0	0	0	0	0
MG: Uncharacterized protein MJ0908 OS=Methanocaldococcus jannaschii (strain ATCC 43067 / DSM 2661 / JAL-1 / JCM 10045 / NBRC 100440) GN=MJ0908 PE=3 SV=1 [Q58318] Score: 404.0	K02230	-	Archaea	Unknown	Euryarchaeota	Methanococci	Methanococcales	Methanocaldococcaceae	Methanocaldococcus	Methanocaldococcus jannaschii	-	0	0	0	0	1	0	1	0	0	0	0	0	0	0	1	0	0	0	0	0	0	0	2	3	0	0	0	0	0	0	0	0	0	0	0	0	0	0
TRXB_METJA Putative thioredoxin reductase OS=Methanocaldococcus jannaschii (strain ATCC 43067 / DSM 2661 / JAL-1 / JCM 10045 / NBRC 100440) GN=MJ1536 PE=3 SV=1	K00384	1.8.1.9	Archaea	Unknown	Euryarchaeota	Methanococci	Methanococcales	Methanocaldococcaceae	Methanocaldococcus	Methanocaldococcus jannaschii	-	0	0	0	0	1	0	1	1	0	1	0	0	0	0	0	0	0	0	0	0	0	0	0	0	0	0	0	0	0	0	0	0	0	0	0	0	0	0
MG: Uncharacterized protein MJ0157 OS=Methanocaldococcus jannaschii (strain ATCC 43067 / DSM 2661 / JAL-1 / JCM 10045 / NBRC 100440) GN=MJ0157 PE=4 SV=1 [Q57621] Score: 51.6	-	-	Archaea	Unknown	Euryarchaeota	Methanococci	Methanococcales	Methanocaldococcaceae	Methanocaldococcus	Methanocaldococcus jannaschii	-	0	0	0	0	6	8	2	1	2	4	4	2	0	0	0	0	0	0	0	0	0	0	0	0	0	0	0	0	0	0	0	0	0	0	0	0	0	0
MG: Putative antitoxin RelB4 OS=Methanocaldococcus jannaschii (strain ATCC 43067 / DSM 2661 / JAL-1 / JCM 10045 / NBRC 100440) GN=relB4 PE=4 SV=1 [Q58572] Score: 93.2	-	-	Archaea	Unknown	Euryarchaeota	Methanococci	Methanococcales	Methanocaldococcaceae	Methanocaldococcus	Methanocaldococcus jannaschii	-	0	0	0	0	2	1	0	0	2	1	0	1	0	0	0	0	0	0	0	0	0	0	0	0	0	0	0	0	0	0	0	0	0	0	0	0	0	0
MG: Uncharacterized protein MJ1118 OS=Methanocaldococcus jannaschii (strain ATCC 43067 / DSM 2661 / JAL-1 / JCM 10045 / NBRC 100440) GN=MJ1118 PE=4 SV=1 [Q58518] Score: 42.7	-	-	Archaea	Unknown	Euryarchaeota	Methanococci	Methanococcales	Methanocaldococcaceae	Methanocaldococcus	Methanocaldococcus jannaschii	-	0	0	0	0	9	11	7	10	4	7	9	8	0	0	0	0	0	0	0	0	0	0	0	0	0	0	0	0	0	0	0	0	0	0	4	2	0	0
MG: Uncharacterized HIT-like protein MJ0866 OS=Methanocaldococcus jannaschii (strain ATCC 43067 / DSM 2661 / JAL-1 / JCM 10045 / NBRC 100440) GN=MJ0866 PE=3 SV=2 [Q58276] Score: 123.0	K02503	-	Archaea	Unknown	Euryarchaeota	Methanococci	Methanococcales	Methanocaldococcaceae	Methanocaldococcus	Methanocaldococcus jannaschii	-	0	0	0	0	2	1	0	0	0	0	0	0	0	0	0	0	0	0	0	0	0	0	0	0	0	0	0	0	0	0	0	0	0	0	0	0	0	0
MG: Uncharacterized protein MJ0039 OS=Methanocaldococcus jannaschii (strain ATCC 43067 / DSM 2661 / JAL-1 / JCM 10045 / NBRC 100440) GN=MJ0039 PE=1 SV=1 [Q60351] Score: 54.3	K03051	-	Archaea	Unknown	Euryarchaeota	Methanococci	Methanococcales	Methanocaldococcaceae	Methanocaldococcus	Methanocaldococcus jannaschii	-	0	0	0	0	3	4	10	11	11	8	10	4	1	4	1	3	1	6	0	0	3	2	0	0	0	4	5	3	4	2	0	0	0	0	0	0	1	1
MG: Thioredoxin OS=Methanocaldococcus jannaschii (strain ATCC 43067 / DSM 2661 / JAL-1 / JCM 10045 / NBRC 100440) GN=trx PE=1 SV=1 [Q57755] Score: 50.1	-	-	Archaea	Unknown	Euryarchaeota	Methanococci	Methanococcales	Methanocaldococcaceae	Methanocaldococcus	Methanocaldococcus jannaschii	-	0	0	0	0	3	10	10	8	14	1	3	0	0	0	0	0	0	0	0	0	0	0	0	0	0	0	0	0	0	0	0	0	0	0	0	0	0	0
MG: Uncharacterized protein MJ0764 OS=Methanocaldococcus jannaschii (strain ATCC 43067 / DSM 2661 / JAL-1 / JCM 10045 / NBRC 100440) GN=MJ0764 PE=1 SV=1 [Q58174] Score: 42.0	-	-	Archaea	Unknown	Euryarchaeota	Methanococci	Methanococcales	Methanocaldococcaceae	Methanocaldococcus	Methanocaldococcus jannaschii	-	0	0	0	0	12	26	8	5	22	9	17	11	0	0	0	0	0	0	0	0	8	8	8	21	0	0	0	0	0	0	0	0	3	0	12	8	0	0
MG: Uncharacterized protein MJ1618 OS=Methanocaldococcus jannaschii (strain ATCC 43067 / DSM 2661 / JAL-1 / JCM 10045 / NBRC 100440) GN=MJ1618 PE=4 SV=1 [Q59013] Score: 42.7	-	-	Archaea	Unknown	Euryarchaeota	Methanococci	Methanococcales	Methanocaldococcaceae	Methanocaldococcus	Methanocaldococcus jannaschii	-	0	0	0	0	12	26	8	5	22	9	17	11	0	0	0	0	0	0	0	0	8	8	8	21	0	0	0	0	0	0	0	0	3	0	12	9	0	0
MG: Uncharacterized protein MJ1141 OS=Methanocaldococcus jannaschii (strain ATCC 43067 / DSM 2661 / JAL-1 / JCM 10045 / NBRC 100440) GN=MJ1141 PE=4 SV=1 [Q58541] Score: 73.6	K09729	-	Archaea	Unknown	Euryarchaeota	Methanococci	Methanococcales	Methanocaldococcaceae	Methanocaldococcus	Methanocaldococcus jannaschii	-	0	0	0	0	1	0	0	0	0	0	0	0	0	0	0	0	0	1	0	0	0	0	0	0	0	0	0	0	0	0	0	0	0	0	0	0	0	0
MG: Uncharacterized protein MJ1020 OS=Methanocaldococcus jannaschii (strain ATCC 43067 / DSM 2661 / JAL-1 / JCM 10045 / NBRC 100440) GN=MJ1020 PE=4 SV=1 [Q58426] Score: 57.8	K09163	-	Archaea	Unknown	Euryarchaeota	Methanococci	Methanococcales	Methanocaldococcaceae	Methanocaldococcus	Methanocaldococcus jannaschii	-	0	0	0	0	2	0	0	0	0	0	0	0	0	0	0	0	0	0	0	0	0	0	0	0	0	0	0	0	0	0	0	0	0	0	0	0	0	0
MG: Uncharacterized HTH-type transcriptional regulator MJ0272 OS=Methanocaldococcus jannaschii (strain ATCC 43067 / DSM 2661 / JAL-1 / JCM 10045 / NBRC 100440) GN=MJ0272 PE=3 SV=2 [Q57720] Score: 69.7	K07729	-	Archaea	Unknown	Euryarchaeota	Methanococci	Methanococcales	Methanocaldococcaceae	Methanocaldococcus	Methanocaldococcus jannaschii	-	0	0	0	0	3	2	1	3	0	0	0	0	0	0	0	1	0	0	0	0	0	1	0	2	0	0	0	0	0	0	0	0	0	0	0	0	0	0
MG: Fructose-bisphosphate aldolase/6-deoxy-5-ketofructose 1-phosphate synthase OS=Methanocaldococcus jannaschii (strain ATCC 43067 / DSM 2661 / JAL-1 / JCM 10045 / NBRC 100440) GN=MJ1585 PE=1 SV=1 [Q58980] Score: 420.0	K16305	2.2.1.11|4.1.2.13	Archaea	Unknown	Euryarchaeota	Methanococci	Methanococcales	Methanocaldococcaceae	Methanocaldococcus	Methanocaldococcus jannaschii	-	0	0	0	0	5	6	12	15	13	12	10	2	0	0	0	0	0	0	0	0	2	0	0	0	0	0	0	0	0	0	0	0	2	0	0	0	0	0
MG: Uncharacterized protein MJ1408 OS=Methanocaldococcus jannaschii (strain ATCC 43067 / DSM 2661 / JAL-1 / JCM 10045 / NBRC 100440) GN=MJ1408 PE=3 SV=2 [Q58803] Score: 244.0	K06943	-	Archaea	Unknown	Euryarchaeota	Methanococci	Methanococcales	Methanocaldococcaceae	Methanocaldococcus	Methanocaldococcus jannaschii	-	0	0	0	0	3	3	9	10	0	0	0	0	0	0	0	0	0	0	0	0	0	0	0	0	0	0	0	0	0	0	0	0	0	0	0	0	0	0
MG: Uncharacterized protein MJ0687 OS=Methanocaldococcus jannaschii (strain ATCC 43067 / DSM 2661 / JAL-1 / JCM 10045 / NBRC 100440) GN=MJ0687 PE=4 SV=2 [Q58100] Score: 52.4	-	-	Archaea	Unknown	Euryarchaeota	Methanococci	Methanococcales	Methanocaldococcaceae	Methanocaldococcus	Methanocaldococcus jannaschii	-	0	0	0	0	1	2	0	0	0	0	0	0	0	0	0	0	0	0	0	0	0	0	0	0	0	0	0	0	0	0	0	0	0	0	0	0	0	0
MG: Uncharacterized protein MJ0558 OS=Methanocaldococcus jannaschii (strain ATCC 43067 / DSM 2661 / JAL-1 / JCM 10045 / NBRC 100440) GN=MJ0558 PE=4 SV=1 [Q57978] Score: 159.0	K07730	-	Archaea	Unknown	Euryarchaeota	Methanococci	Methanococcales	Methanocaldococcaceae	Methanocaldococcus	Methanocaldococcus jannaschii	-	0	0	0	0	8	3	8	9	10	8	11	5	0	0	0	0	0	0	0	0	0	0	2	2	0	0	0	0	0	0	0	0	0	0	1	0	0	0
MG: Uncharacterized ATP-binding protein MJ0685 OS=Methanocaldococcus jannaschii (strain ATCC 43067 / DSM 2661 / JAL-1 / JCM 10045 / NBRC 100440) GN=MJ0685 PE=4 SV=1 [Q58098] Score: 241.0	K07321	-	Archaea	Unknown	Euryarchaeota	Methanococci	Methanococcales	Methanocaldococcaceae	Methanocaldococcus	Methanocaldococcus jannaschii	-	0	0	0	0	4	2	6	6	7	10	5	5	0	2	4	0	2	4	0	0	0	0	1	0	2	1	0	0	0	0	0	0	1	2	1	0	0	0
MG: Uncharacterized protein MJ1426 OS=Methanocaldococcus jannaschii (strain ATCC 43067 / DSM 2661 / JAL-1 / JCM 10045 / NBRC 100440) GN=MJ1426 PE=3 SV=1 [Q58821] Score: 62.0	-	-	Archaea	Unknown	Euryarchaeota	Methanococci	Methanococcales	Methanocaldococcaceae	Methanocaldococcus	Methanocaldococcus jannaschii	-	0	0	0	0	5	12	6	7	5	6	1	7	3	0	1	0	2	0	0	0	0	0	0	0	0	0	0	0	0	0	0	0	1	1	1	1	0	0
MG: DNA-directed RNA polymerase subunit E' OS=Methanocaldococcus jannaschii (strain ATCC 43067 / DSM 2661 / JAL-1 / JCM 10045 / NBRC 100440) GN=rpoE1 PE=1 SV=1 [Q57840] Score: 191.0	K03049	2.7.7.6	Archaea	Unknown	Euryarchaeota	Methanococci	Methanococcales	Methanocaldococcaceae	Methanocaldococcus	Methanocaldococcus jannaschii	-	0	0	0	0	4	4	2	1	2	0	4	3	2	1	9	2	2	10	1	4	0	0	0	0	0	0	0	0	0	0	0	0	0	0	0	0	0	0
MG: Uncharacterized HTH-type transcriptional regulator MJ1545 OS=Methanocaldococcus jannaschii (strain ATCC 43067 / DSM 2661 / JAL-1 / JCM 10045 / NBRC 100440) GN=MJ1545 PE=3 SV=1 [Q58940] Score: 235.0	K07731	-	Archaea	Unknown	Euryarchaeota	Methanococci	Methanococcales	Methanocaldococcaceae	Methanocaldococcus	Methanocaldococcus jannaschii	-	0	0	0	0	4	3	2	1	2	1	0	1	0	0	0	0	0	0	0	0	0	0	0	0	0	0	0	0	0	0	0	0	0	0	0	0	0	0
MG: Uncharacterized protein MJ0054 OS=Methanocaldococcus jannaschii (strain ATCC 43067 / DSM 2661 / JAL-1 / JCM 10045 / NBRC 100440) GN=MJ0054 PE=4 SV=1 [Q60361] Score: 223.0	-	-	Archaea	Unknown	Euryarchaeota	Methanococci	Methanococcales	Methanocaldococcaceae	Methanocaldococcus	Methanocaldococcus jannaschii	-	0	0	0	0	9	3	11	3	3	3	0	1	0	0	0	0	0	0	0	0	0	1	0	0	0	0	0	0	0	0	0	0	0	0	0	0	0	0
MG: Uncharacterized protein MJ1330 OS=Methanocaldococcus jannaschii (strain ATCC 43067 / DSM 2661 / JAL-1 / JCM 10045 / NBRC 100440) GN=MJ1330 PE=4 SV=2 [Q58726] Score: 88.6	-	-	Archaea	Unknown	Euryarchaeota	Methanococci	Methanococcales	Methanocaldococcaceae	Methanocaldococcus	Methanocaldococcus jannaschii	-	0	0	0	0	1	0	1	1	4	2	3	1	4	5	1	4	8	4	4	3	2	2	0	0	6	8	7	13	0	0	0	1	0	1	14	6	9	1
MG: Uncharacterized protein MJ1601 OS=Methanocaldococcus jannaschii (strain ATCC 43067 / DSM 2661 / JAL-1 / JCM 10045 / NBRC 100440) GN=MJ1601 PE=3 SV=1 [Q58996] Score: 85.9	-	-	Archaea	Unknown	Euryarchaeota	Methanococci	Methanococcales	Methanocaldococcaceae	Methanocaldococcus	Methanocaldococcus jannaschii	-	0	0	0	0	2	1	1	0	0	0	0	0	0	0	0	0	0	0	0	0	0	0	0	0	0	0	0	0	0	0	0	0	0	0	0	0	0	0
MG: Uncharacterized protein MJ0967 OS=Methanocaldococcus jannaschii (strain ATCC 43067 / DSM 2661 / JAL-1 / JCM 10045 / NBRC 100440) GN=MJ0967 PE=3 SV=1 [Q58377] Score: 170.0	K05520	-	Archaea	Unknown	Euryarchaeota	Methanococci	Methanococcales	Methanocaldococcaceae	Methanocaldococcus	Methanocaldococcus jannaschii	-	0	0	0	0	2	2	1	1	1	2	1	4	0	1	0	0	0	0	0	0	0	0	0	0	1	0	0	0	0	0	0	0	0	0	0	1	0	0
MG: Methyl-coenzyme M reductase I operon protein C OS=Methanocaldococcus jannaschii (strain ATCC 43067 / DSM 2661 / JAL-1 / JCM 10045 / NBRC 100440) GN=mcrC PE=3 SV=1 [Q58254] Score: 211.0	K03421	-	Archaea	Unknown	Euryarchaeota	Methanococci	Methanococcales	Methanocaldococcaceae	Methanocaldococcus	Methanocaldococcus jannaschii	-	0	0	0	0	11	10	13	16	18	12	9	9	12	15	10	6	12	10	3	8	3	0	0	1	18	17	19	13	18	10	10	13	3	5	17	9	6	3
MG: Uncharacterized HTH-type transcriptional regulator MJ0586 OS=Methanocaldococcus jannaschii (strain ATCC 43067 / DSM 2661 / JAL-1 / JCM 10045 / NBRC 100440) GN=MJ0586 PE=3 SV=1 [Q58006] Score: 68.9	K03627	-	Archaea	Unknown	Euryarchaeota	Methanococci	Methanococcales	Methanocaldococcaceae	Methanocaldococcus	Methanocaldococcus jannaschii	-	0	0	0	0	2	2	0	1	0	0	0	0	0	0	0	0	0	0	0	0	0	0	0	0	7	2	0	0	0	0	0	0	0	0	0	0	0	0
MG: Uncharacterized protein MJ0949 OS=Methanocaldococcus jannaschii (strain ATCC 43067 / DSM 2661 / JAL-1 / JCM 10045 / NBRC 100440) GN=MJ0949 PE=4 SV=1 [Q58359] Score: 78.6	K09727	-	Archaea	Unknown	Euryarchaeota	Methanococci	Methanococcales	Methanocaldococcaceae	Methanocaldococcus	Methanocaldococcus jannaschii	-	0	0	0	0	7	3	2	4	2	2	0	0	0	0	0	0	0	0	0	0	0	0	0	0	0	0	0	0	0	0	0	0	0	0	0	0	0	0
MG: Uncharacterized protein MJ0405 OS=Methanocaldococcus jannaschii (strain ATCC 43067 / DSM 2661 / JAL-1 / JCM 10045 / NBRC 100440) GN=MJ0405 PE=4 SV=1 [Q57848] Score: 80.5	-	-	Archaea	Unknown	Euryarchaeota	Methanococci	Methanococcales	Methanocaldococcaceae	Methanocaldococcus	Methanocaldococcus jannaschii	-	0	0	0	0	2	1	0	0	3	0	0	0	0	0	1	2	4	0	1	1	1	0	0	0	1	2	1	2	5	3	0	2	5	1	6	3	2	1
MG: Uncharacterized protein MJ0572 OS=Methanocaldococcus jannaschii (strain ATCC 43067 / DSM 2661 / JAL-1 / JCM 10045 / NBRC 100440) GN=MJ0572 PE=3 SV=1 [Q57992] Score: 49.7	-	-	Archaea	Unknown	Euryarchaeota	Methanococci	Methanococcales	Methanocaldococcaceae	Methanocaldococcus	Methanocaldococcus jannaschii	-	0	0	0	0	5	4	0	0	0	0	0	0	0	0	0	0	0	0	0	0	0	0	1	0	0	0	0	0	0	0	0	0	0	0	0	0	0	0
MG: Phosphodiesterase MJ0936 OS=Methanocaldococcus jannaschii (strain ATCC 43067 / DSM 2661 / JAL-1 / JCM 10045 / NBRC 100440) GN=MJ0936 PE=1 SV=1 [Q58346] Score: 121.0	K07095	3.1.4.-	Archaea	Unknown	Euryarchaeota	Methanococci	Methanococcales	Methanocaldococcaceae	Methanocaldococcus	Methanocaldococcus jannaschii	-	0	0	0	0	11	7	1	13	5	3	0	0	0	0	0	0	0	0	0	0	0	0	0	0	0	0	0	0	0	0	0	0	0	0	0	0	0	0
MG: Uncharacterized protein MJ1365 OS=Methanocaldococcus jannaschii (strain ATCC 43067 / DSM 2661 / JAL-1 / JCM 10045 / NBRC 100440) GN=MJ1365 PE=4 SV=1 [Q58760] Score: 154.0	-	-	Archaea	Unknown	Euryarchaeota	Methanococci	Methanococcales	Methanocaldococcaceae	Methanocaldococcus	Methanocaldococcus jannaschii	-	0	0	0	0	1	0	0	0	0	0	0	0	0	0	0	0	0	0	0	0	0	0	0	0	0	0	0	0	0	0	0	0	0	0	0	0	0	0
MG: Uncharacterized HTH-type transcriptional regulator MJ0621 OS=Methanocaldococcus jannaschii (strain ATCC 43067 / DSM 2661 / JAL-1 / JCM 10045 / NBRC 100440) GN=MJ0621 PE=3 SV=1 [Q58038] Score: 127.0	-	-	Archaea	Unknown	Euryarchaeota	Methanococci	Methanococcales	Methanocaldococcaceae	Methanocaldococcus	Methanocaldococcus jannaschii	-	0	0	0	0	32	23	24	34	11	11	7	3	0	0	0	1	1	0	0	0	0	0	0	0	0	0	0	0	0	0	0	0	0	0	3	0	0	0
MG: Ribosome maturation protein SDO1 homolog OS=Methanocaldococcus jannaschii (strain ATCC 43067 / DSM 2661 / JAL-1 / JCM 10045 / NBRC 100440) GN=MJ0592 PE=3 SV=1 [Q58011] Score: 258.0	K14574	-	Archaea	Unknown	Euryarchaeota	Methanococci	Methanococcales	Methanocaldococcaceae	Methanocaldococcus	Methanocaldococcus jannaschii	-	0	0	0	0	1	1	1	0	0	3	1	0	0	0	0	0	4	0	0	0	0	0	0	0	1	2	0	0	0	0	0	0	0	0	0	0	0	0
MG: Uncharacterized ABC transporter ATP-binding protein MJ1508 OS=Methanocaldococcus jannaschii (strain ATCC 43067 / DSM 2661 / JAL-1 / JCM 10045 / NBRC 100440) GN=MJ1508 PE=3 SV=1 [Q58903] Score: 223.0	K02003	-	Archaea	Unknown	Euryarchaeota	Methanococci	Methanococcales	Methanocaldococcaceae	Methanocaldococcus	Methanocaldococcus jannaschii	-	0	0	0	0	1	0	0	0	0	0	0	0	0	0	0	0	0	0	0	0	0	0	0	0	0	0	0	0	0	0	0	0	0	0	1	0	1	0
MG: Uncharacterized protein MJ1519 OS=Methanocaldococcus jannaschii (strain ATCC 43067 / DSM 2661 / JAL-1 / JCM 10045 / NBRC 100440) GN=MJ1519 PE=4 SV=1 [Q58914] Score: 65.9	K03581	-	Archaea	Unknown	Euryarchaeota	Methanococci	Methanococcales	Methanocaldococcaceae	Methanocaldococcus	Methanocaldococcus jannaschii	-	0	0	0	0	1	0	0	0	0	0	0	0	1	0	0	0	0	0	0	0	0	0	0	1	0	0	1	0	0	0	0	0	0	0	0	0	0	0
MG: Uncharacterized protein MJ0374 OS=Methanocaldococcus jannaschii (strain ATCC 43067 / DSM 2661 / JAL-1 / JCM 10045 / NBRC 100440) GN=MJ0374 PE=4 SV=1 [Q57819] Score: 58.2	-	-	Archaea	Unknown	Euryarchaeota	Methanococci	Methanococcales	Methanocaldococcaceae	Methanocaldococcus	Methanocaldococcus jannaschii	-	0	0	0	0	1	0	0	0	0	0	0	0	0	0	0	0	0	0	0	0	0	0	0	0	0	0	0	0	0	0	0	0	0	0	0	0	0	0
MG: Uncharacterized ATP-binding protein MJ0547 OS=Methanocaldococcus jannaschii (strain ATCC 43067 / DSM 2661 / JAL-1 / JCM 10045 / NBRC 100440) GN=MJ0547 PE=4 SV=1 [Q57967] Score: 285.0	K03609	-	Archaea	Unknown	Euryarchaeota	Methanococci	Methanococcales	Methanocaldococcaceae	Methanocaldococcus	Methanocaldococcus jannaschii	-	0	0	0	0	1	0	0	0	0	0	0	1	0	0	0	0	0	0	0	0	0	0	0	0	0	0	0	0	0	1	0	0	0	0	0	0	0	0
MG: CRISPR type III-associated protein Csm2 OS=Methanocaldococcus jannaschii (strain ATCC 43067 / DSM 2661 / JAL-1 / JCM 10045 / NBRC 100440) GN=csm2 PE=3 SV=1 [Q59064] Score: 48.1	K19138	-	Archaea	Unknown	Euryarchaeota	Methanococci	Methanococcales	Methanocaldococcaceae	Methanocaldococcus	Methanocaldococcus jannaschii	-	0	0	0	0	1	0	0	0	0	0	0	0	0	0	0	0	0	0	0	0	0	0	0	0	0	0	0	0	0	0	0	0	0	0	0	0	0	0
MG: Uncharacterized ferredoxin MJ0265 OS=Methanocaldococcus jannaschii (strain ATCC 43067 / DSM 2661 / JAL-1 / JCM 10045 / NBRC 100440) GN=MJ0265 PE=3 SV=2 [Q57713] Score: 45.8	K00196	-	Archaea	Unknown	Euryarchaeota	Methanococci	Methanococcales	Methanocaldococcaceae	Methanocaldococcus	Methanocaldococcus jannaschii	-	0	0	0	0	1	3	0	0	1	0	0	0	4	5	0	0	1	2	0	0	0	0	0	0	0	0	0	0	0	0	0	0	0	0	0	0	0	0
MG: Uncharacterized protein MJ0966 OS=Methanocaldococcus jannaschii (strain ATCC 43067 / DSM 2661 / JAL-1 / JCM 10045 / NBRC 100440) GN=MJ0966 PE=4 SV=1 [Q58376] Score: 63.2	-	-	Archaea	Unknown	Euryarchaeota	Methanococci	Methanococcales	Methanocaldococcaceae	Methanocaldococcus	Methanocaldococcus jannaschii	-	0	0	0	0	2	0	0	0	2	2	0	2	2	2	0	0	0	1	0	0	0	0	0	0	0	0	1	0	0	1	0	1	0	0	0	1	1	0
MG: Uncharacterized ferredoxin MJ0146 OS=Methanocaldococcus jannaschii (strain ATCC 43067 / DSM 2661 / JAL-1 / JCM 10045 / NBRC 100440) GN=MJ0146 PE=3 SV=1 [Q57610] Score: 58.2	K00176	-	Archaea	Unknown	Euryarchaeota	Methanococci	Methanococcales	Methanocaldococcaceae	Methanocaldococcus	Methanocaldococcus jannaschii	-	0	0	0	0	0	1	6	4	0	1	0	2	3	2	0	2	4	3	0	1	0	0	2	0	0	0	0	0	0	0	0	0	0	0	0	0	0	0
MG: 7,8-dihydro-6-hydroxymethylpterin dimethyltransferase OS=Methanocaldococcus jannaschii (strain ATCC 43067 / DSM 2661 / JAL-1 / JCM 10045 / NBRC 100440) GN=MJ0619 PE=1 SV=1 [Q58036] Score: 231.0	K06937	2.1.1.-	Archaea	Unknown	Euryarchaeota	Methanococci	Methanococcales	Methanocaldococcaceae	Methanocaldococcus	Methanocaldococcus jannaschii	-	0	0	0	0	0	1	1	0	0	0	0	0	0	0	0	0	0	0	0	0	0	0	0	0	0	0	0	0	0	0	0	0	0	0	0	0	0	0
MG: Uncharacterized glycosyltransferase MJ1057 OS=Methanocaldococcus jannaschii (strain ATCC 43067 / DSM 2661 / JAL-1 / JCM 10045 / NBRC 100440) GN=MJ1057 PE=3 SV=2 [Q58457] Score: 54.7	-	2.4.-.-	Archaea	Unknown	Euryarchaeota	Methanococci	Methanococcales	Methanocaldococcaceae	Methanocaldococcus	Methanocaldococcus jannaschii	-	0	0	0	0	0	1	0	0	0	0	0	0	0	0	0	0	0	0	0	0	0	0	0	0	0	0	0	0	0	0	1	0	0	0	0	0	0	0
MG: Uncharacterized protein MJ0683 OS=Methanocaldococcus jannaschii (strain ATCC 43067 / DSM 2661 / JAL-1 / JCM 10045 / NBRC 100440) GN=MJ0683 PE=4 SV=1 [Q58096] Score: 139.0	-	-	Archaea	Unknown	Euryarchaeota	Methanococci	Methanococcales	Methanocaldococcaceae	Methanocaldococcus	Methanocaldococcus jannaschii	-	0	0	0	0	0	1	0	0	0	0	0	0	1	0	0	0	0	0	0	0	0	0	0	0	0	0	0	0	0	0	0	0	0	0	0	0	0	0
MG: Putative ABC transporter permease protein MJ0087 OS=Methanocaldococcus jannaschii (strain ATCC 43067 / DSM 2661 / JAL-1 / JCM 10045 / NBRC 100440) GN=MJ0087 PE=3 SV=1 [Q57552] Score: 97.4	K02015	-	Archaea	Unknown	Euryarchaeota	Methanococci	Methanococcales	Methanocaldococcaceae	Methanocaldococcus	Methanocaldococcus jannaschii	-	0	0	0	0	0	1	0	0	0	0	0	0	0	0	0	0	1	0	0	0	0	0	0	0	1	0	0	0	0	1	0	0	0	0	0	0	0	0
MG: Uncharacterized protein MJ0640 OS=Methanocaldococcus jannaschii (strain ATCC 43067 / DSM 2661 / JAL-1 / JCM 10045 / NBRC 100440) GN=MJ0640 PE=4 SV=1 [Q58057] Score: 293.0	K07123	-	Archaea	Unknown	Euryarchaeota	Methanococci	Methanococcales	Methanocaldococcaceae	Methanocaldococcus	Methanocaldococcus jannaschii	-	0	0	0	0	0	3	11	11	3	0	0	1	2	0	0	0	0	0	0	0	0	0	0	0	0	0	0	1	0	0	0	0	0	0	1	0	0	2
MG: Cobalt-precorrin-4 C(11)-methyltransferase OS=Methanocaldococcus jannaschii (strain ATCC 43067 / DSM 2661 / JAL-1 / JCM 10045 / NBRC 100440) GN=cbiF PE=3 SV=1 [Q58973] Score: 239.0	K05936	2.1.1.271	Archaea	Unknown	Euryarchaeota	Methanococci	Methanococcales	Methanocaldococcaceae	Methanocaldococcus	Methanocaldococcus jannaschii	-	0	0	0	0	0	1	3	2	0	0	0	0	0	0	0	0	0	0	0	0	0	0	0	0	0	0	0	0	0	0	1	0	0	0	0	0	0	1
MG: KH domain-containing protein MJ0443 OS=Methanocaldococcus jannaschii (strain ATCC 43067 / DSM 2661 / JAL-1 / JCM 10045 / NBRC 100440) GN=MJ0443 PE=3 SV=1 [Q57885] Score: 155.0	K06961	-	Archaea	Unknown	Euryarchaeota	Methanococci	Methanococcales	Methanocaldococcaceae	Methanocaldococcus	Methanocaldococcus jannaschii	-	0	0	0	0	0	1	0	0	0	0	0	0	4	8	2	0	4	0	0	0	0	0	0	0	0	0	0	0	0	0	0	0	0	0	0	0	0	0
MG: Uncharacterized transporter MJ0449 OS=Methanocaldococcus jannaschii (strain ATCC 43067 / DSM 2661 / JAL-1 / JCM 10045 / NBRC 100440) GN=MJ0449 PE=3 SV=1 [Q57891] Score: 73.2	-	-	Archaea	Unknown	Euryarchaeota	Methanococci	Methanococcales	Methanocaldococcaceae	Methanocaldococcus	Methanocaldococcus jannaschii	-	0	0	0	0	0	2	0	0	0	0	0	0	1	0	0	0	0	0	0	0	0	0	0	0	0	0	0	0	0	0	0	0	0	0	0	0	0	0
MG: Uncharacterized protein MJ1227 OS=Methanocaldococcus jannaschii (strain ATCC 43067 / DSM 2661 / JAL-1 / JCM 10045 / NBRC 100440) GN=MJ1227 PE=3 SV=1 [Q58624] Score: 131.0	K04069	1.97.1.-	Archaea	Unknown	Euryarchaeota	Methanococci	Methanococcales	Methanocaldococcaceae	Methanocaldococcus	Methanocaldococcus jannaschii	-	0	0	0	0	0	1	0	0	0	0	0	0	0	0	0	0	0	0	0	0	0	0	0	2	0	0	0	0	2	0	1	1	0	0	0	0	0	0
MG: 7,8-dihydropterin-6-methyl-4-(beta-D-ribofuranosyl)-aminobenzene-5'-phosphate synthase OS=Methanocaldococcus jannaschii (strain ATCC 43067 / DSM 2661 / JAL-1 / JCM 10045 / NBRC 100440) GN=MJ0301 PE=1 SV=1 [Q57749] Score: 101.0	K06897	2.5.1.105	Archaea	Unknown	Euryarchaeota	Methanococci	Methanococcales	Methanocaldococcaceae	Methanocaldococcus	Methanocaldococcus jannaschii	-	0	0	0	0	0	1	0	0	0	0	0	0	0	0	0	0	0	0	0	0	2	0	0	1	0	0	0	0	0	0	0	0	0	0	0	0	0	0
MG: Uncharacterized protein MJ0550 OS=Methanocaldococcus jannaschii (strain ATCC 43067 / DSM 2661 / JAL-1 / JCM 10045 / NBRC 100440) GN=MJ0550 PE=4 SV=1 [Q57970] Score: 130.0	K06936	-	Archaea	Unknown	Euryarchaeota	Methanococci	Methanococcales	Methanocaldococcaceae	Methanocaldococcus	Methanocaldococcus jannaschii	-	0	0	0	0	0	1	0	0	0	0	0	0	0	0	0	1	0	0	0	0	0	0	0	0	0	0	0	0	0	0	0	0	0	0	0	0	0	0
MG: Uncharacterized GTP-binding protein MJ1332 OS=Methanocaldococcus jannaschii (strain ATCC 43067 / DSM 2661 / JAL-1 / JCM 10045 / NBRC 100440) GN=MJ1332 PE=3 SV=1 [Q58728] Score: 151.0	K06942	-	Archaea	Unknown	Euryarchaeota	Methanococci	Methanococcales	Methanocaldococcaceae	Methanocaldococcus	Methanocaldococcus jannaschii	-	0	0	0	0	0	1	1	3	2	0	0	0	0	0	0	0	0	0	0	0	0	0	0	0	0	0	0	0	0	1	0	0	0	0	0	0	0	0
MG: Uncharacterized protein MJ1134 OS=Methanocaldococcus jannaschii (strain ATCC 43067 / DSM 2661 / JAL-1 / JCM 10045 / NBRC 100440) GN=MJ1134 PE=4 SV=1 [Q58534] Score: 52.0	K05896	-	Archaea	Unknown	Euryarchaeota	Methanococci	Methanococcales	Methanocaldococcaceae	Methanocaldococcus	Methanocaldococcus jannaschii	-	0	0	0	0	0	1	0	0	0	0	0	0	0	0	0	0	0	0	0	0	0	0	0	0	0	0	0	0	0	0	0	0	0	0	0	0	0	0
MG: Uncharacterized ATP-dependent helicase MJ0104 OS=Methanocaldococcus jannaschii (strain ATCC 43067 / DSM 2661 / JAL-1 / JCM 10045 / NBRC 100440) GN=MJ0104 PE=3 SV=1 [Q57568] Score: 172.0	-	3.6.4.-	Archaea	Unknown	Euryarchaeota	Methanococci	Methanococcales	Methanocaldococcaceae	Methanocaldococcus	Methanocaldococcus jannaschii	-	0	0	0	0	0	1	2	1	1	6	6	4	0	0	1	1	0	2	0	0	0	0	0	0	1	3	2	1	2	0	1	0	0	0	0	0	4	3
MG: Probable aspartokinase OS=Methanocaldococcus jannaschii (strain ATCC 43067 / DSM 2661 / JAL-1 / JCM 10045 / NBRC 100440) GN=MJ0571 PE=1 SV=1 [Q57991] Score: 119.0	K00928	2.7.2.4	Archaea	Unknown	Euryarchaeota	Methanococci	Methanococcales	Methanocaldococcaceae	Methanocaldococcus	Methanocaldococcus jannaschii	-	0	0	0	0	0	0	5	2	0	0	0	0	0	0	0	0	0	0	0	0	0	0	0	0	0	0	0	0	0	0	0	0	0	0	0	0	0	0
MG: Uncharacterized protein MJ1236 OS=Methanocaldococcus jannaschii (strain ATCC 43067 / DSM 2661 / JAL-1 / JCM 10045 / NBRC 100440) GN=MJ1236 PE=4 SV=1 [Q58633] Score: 705.0	K07041	-	Archaea	Unknown	Euryarchaeota	Methanococci	Methanococcales	Methanocaldococcaceae	Methanocaldococcus	Methanocaldococcus jannaschii	-	0	0	0	0	0	0	5	9	4	2	0	0	0	0	0	0	0	0	0	0	0	0	1	0	0	1	0	0	0	0	0	0	0	0	0	0	0	0
MG: Replication factor A OS=Methanocaldococcus jannaschii (strain ATCC 43067 / DSM 2661 / JAL-1 / JCM 10045 / NBRC 100440) GN=rpa PE=1 SV=1 [Q58559] Score: 149.0	K07466	-	Archaea	Unknown	Euryarchaeota	Methanococci	Methanococcales	Methanocaldococcaceae	Methanocaldococcus	Methanocaldococcus jannaschii	-	0	0	0	0	0	0	2	0	0	0	0	0	0	0	0	0	0	0	0	0	0	0	0	0	0	0	0	0	0	0	0	0	0	0	0	0	0	0
MG: Uncharacterized protein MJ1633 OS=Methanocaldococcus jannaschii (strain ATCC 43067 / DSM 2661 / JAL-1 / JCM 10045 / NBRC 100440) GN=MJ1633 PE=3 SV=1 [Q59027] Score: 315.0	-	-	Archaea	Unknown	Euryarchaeota	Methanococci	Methanococcales	Methanocaldococcaceae	Methanocaldococcus	Methanocaldococcus jannaschii	-	0	0	0	0	0	0	4	0	5	3	1	4	0	0	0	0	0	0	0	0	0	0	0	0	0	0	0	0	0	0	0	0	0	0	0	0	0	0
MG: Uncharacterized protein MJ0900 OS=Methanocaldococcus jannaschii (strain ATCC 43067 / DSM 2661 / JAL-1 / JCM 10045 / NBRC 100440) GN=MJ0900 PE=3 SV=1 [Q58310] Score: 254.0	K07332	-	Archaea	Unknown	Euryarchaeota	Methanococci	Methanococcales	Methanocaldococcaceae	Methanocaldococcus	Methanocaldococcus jannaschii	-	0	0	0	0	0	0	5	0	0	0	0	0	0	1	0	0	1	0	0	0	0	0	0	0	0	0	0	0	0	0	0	0	0	0	0	0	0	0
MG: Uncharacterized protein MJ1287 OS=Methanocaldococcus jannaschii (strain ATCC 43067 / DSM 2661 / JAL-1 / JCM 10045 / NBRC 100440) GN=MJ1287 PE=3 SV=1 [Q58683] Score: 76.3	K07332	-	Archaea	Unknown	Euryarchaeota	Methanococci	Methanococcales	Methanocaldococcaceae	Methanocaldococcus	Methanocaldococcus jannaschii	-	0	0	0	0	0	0	5	1	0	0	0	0	0	0	0	0	0	0	0	0	0	0	0	0	0	0	0	0	0	0	0	0	0	0	0	0	0	0
MG: Uncharacterized protein MJ0309 OS=Methanocaldococcus jannaschii (strain ATCC 43067 / DSM 2661 / JAL-1 / JCM 10045 / NBRC 100440) GN=MJ0309 PE=3 SV=1 [Q57757] Score: 201.0	K01480	-	Archaea	Unknown	Euryarchaeota	Methanococci	Methanococcales	Methanocaldococcaceae	Methanocaldococcus	Methanocaldococcus jannaschii	-	0	0	0	0	0	0	2	0	0	0	0	0	0	0	0	0	0	0	0	0	0	0	0	0	0	0	0	0	0	0	0	0	0	0	0	0	0	0
MG: Cobalt-precorrin-8 methylmutase OS=Methanocaldococcus jannaschii (strain ATCC 43067 / DSM 2661 / JAL-1 / JCM 10045 / NBRC 100440) GN=cbiC PE=3 SV=1 [Q58340] Score: 146.0	K06042	5.4.99.60	Archaea	Unknown	Euryarchaeota	Methanococci	Methanococcales	Methanocaldococcaceae	Methanocaldococcus	Methanocaldococcus jannaschii	-	0	0	0	0	0	0	2	1	0	1	0	0	0	0	0	0	0	0	0	0	0	0	0	0	0	0	0	0	0	0	0	0	0	0	0	0	0	0
MG: Uncharacterized protein MJ0804 OS=Methanocaldococcus jannaschii (strain ATCC 43067 / DSM 2661 / JAL-1 / JCM 10045 / NBRC 100440) GN=MJ0804 PE=4 SV=2 [Q58214] Score: 50.4	-	-	Archaea	Unknown	Euryarchaeota	Methanococci	Methanococcales	Methanocaldococcaceae	Methanocaldococcus	Methanocaldococcus jannaschii	-	0	0	0	0	0	0	4	4	0	0	0	0	0	0	0	0	0	0	0	0	0	0	0	0	0	0	0	0	0	0	0	0	0	0	0	0	0	0
MG: Acetyl-CoA decarbonylase/synthase complex subunit gamma OS=Methanocaldococcus jannaschii (strain ATCC 43067 / DSM 2661 / JAL-1 / JCM 10045 / NBRC 100440) GN=cdhE PE=3 SV=1 [Q57576] Score: 67.0	K00197	2.1.1.245	Archaea	Unknown	Euryarchaeota	Methanococci	Methanococcales	Methanocaldococcaceae	Methanocaldococcus	Methanocaldococcus jannaschii	-	0	0	0	0	0	0	10	6	0	0	0	0	0	0	0	0	0	0	0	0	0	0	0	0	0	0	0	0	0	0	0	0	0	0	0	0	0	0
MG: Putative hydrogenase expression/formation protein MJ0676 OS=Methanocaldococcus jannaschii (strain ATCC 43067 / DSM 2661 / JAL-1 / JCM 10045 / NBRC 100440) GN=MJ0676 PE=3 SV=1 [Q58089] Score: 114.0	K04655	-	Archaea	Unknown	Euryarchaeota	Methanococci	Methanococcales	Methanocaldococcaceae	Methanocaldococcus	Methanocaldococcus jannaschii	-	0	0	0	0	0	0	2	0	0	0	1	0	0	0	0	1	1	0	0	0	0	0	0	0	0	0	0	2	3	0	1	0	0	0	0	0	0	0
MG: Probable cobalt-precorrin-7 C(5)-methyltransferase OS=Methanocaldococcus jannaschii (strain ATCC 43067 / DSM 2661 / JAL-1 / JCM 10045 / NBRC 100440) GN=cbiE PE=3 SV=1 [Q58917] Score: 74.3	K03399	2.1.1.289	Archaea	Unknown	Euryarchaeota	Methanococci	Methanococcales	Methanocaldococcaceae	Methanocaldococcus	Methanocaldococcus jannaschii	-	0	0	0	0	0	0	1	1	0	0	0	0	0	0	0	0	0	0	0	0	0	0	0	0	0	0	0	0	0	0	0	0	0	0	0	0	0	0
MG: TPR repeat-containing protein MJ0798 OS=Methanocaldococcus jannaschii (strain ATCC 43067 / DSM 2661 / JAL-1 / JCM 10045 / NBRC 100440) GN=MJ0798 PE=3 SV=1 [Q58208] Score: 76.6	-	-	Archaea	Unknown	Euryarchaeota	Methanococci	Methanococcales	Methanocaldococcaceae	Methanocaldococcus	Methanocaldococcus jannaschii	-	0	0	0	0	0	0	1	0	0	2	0	1	0	4	3	0	3	1	1	0	0	0	0	0	0	0	0	0	0	0	0	0	0	0	0	0	0	0
MG: Uncharacterized protein MJ0808 OS=Methanocaldococcus jannaschii (strain ATCC 43067 / DSM 2661 / JAL-1 / JCM 10045 / NBRC 100440) GN=MJ0808 PE=4 SV=1 [Q58218] Score: 180.0	K04069	-	Archaea	Unknown	Euryarchaeota	Methanococci	Methanococcales	Methanocaldococcaceae	Methanocaldococcus	Methanocaldococcus jannaschii	-	0	0	0	0	0	0	1	0	0	0	0	0	2	3	3	3	2	0	0	0	0	0	1	0	0	0	2	0	0	1	0	0	0	0	0	0	0	0
Y1341_METJA Uncharacterized protein MJ1341 OS=Methanocaldococcus jannaschii (strain ATCC 43067 / DSM 2661 / JAL-1 / JCM 10045 / NBRC 100440) GN=MJ1341 PE=4 SV=1	-	-	Archaea	Unknown	Euryarchaeota	Methanococci	Methanococcales	Methanocaldococcaceae	Methanocaldococcus	Methanocaldococcus jannaschii	-	0	0	0	0	0	0	1	0	0	0	0	0	0	0	0	0	0	0	0	0	0	0	0	0	0	0	0	0	0	0	0	0	0	0	0	0	0	0
MG: Putative molybdopterin biosynthesis protein MJ0666 OS=Methanocaldococcus jannaschii (strain ATCC 43067 / DSM 2661 / JAL-1 / JCM 10045 / NBRC 100440) GN=MJ0666 PE=3 SV=1 [Q58080] Score: 250.0	K03750	-	Archaea	Unknown	Euryarchaeota	Methanococci	Methanococcales	Methanocaldococcaceae	Methanocaldococcus	Methanocaldococcus jannaschii	-	0	0	0	0	0	0	1	0	0	0	1	0	0	0	0	0	0	0	0	0	0	0	0	0	0	0	0	0	0	0	0	0	0	0	0	0	0	0
MG: Uncharacterized protein MJ1210 OS=Methanocaldococcus jannaschii (strain ATCC 43067 / DSM 2661 / JAL-1 / JCM 10045 / NBRC 100440) GN=MJ1210 PE=4 SV=1 [Q58607] Score: 192.0	K07159	-	Archaea	Unknown	Euryarchaeota	Methanococci	Methanococcales	Methanocaldococcaceae	Methanocaldococcus	Methanocaldococcus jannaschii	-	0	0	0	0	0	0	1	0	0	0	0	0	0	0	0	0	0	0	0	0	0	0	0	0	0	0	0	0	0	0	0	0	0	0	0	0	0	0
MG: CRISPR-associated endoribonuclease Cas6 2 OS=Methanocaldococcus jannaschii (strain ATCC 43067 / DSM 2661 / JAL-1 / JCM 10045 / NBRC 100440) GN=cas6b PE=3 SV=1 [Q58631] Score: 177.0	K19091	3.1.-.-	Archaea	Unknown	Euryarchaeota	Methanococci	Methanococcales	Methanocaldococcaceae	Methanocaldococcus	Methanocaldococcus jannaschii	-	0	0	0	0	0	0	1	0	1	1	0	0	0	0	0	0	0	0	0	0	0	0	0	0	0	0	0	0	0	0	0	0	0	0	0	0	0	0
MG: Uncharacterized KH and PIN-domain containing protein MJ1533 OS=Methanocaldococcus jannaschii (strain ATCC 43067 / DSM 2661 / JAL-1 / JCM 10045 / NBRC 100440) GN=MJ1533 PE=1 SV=1 [Q58928] Score: 444.0	K06865	-	Archaea	Unknown	Euryarchaeota	Methanococci	Methanococcales	Methanocaldococcaceae	Methanocaldococcus	Methanocaldococcus jannaschii	-	0	0	0	0	0	0	3	0	0	0	0	1	4	1	3	1	2	2	0	0	0	0	0	0	1	0	0	0	0	0	0	0	0	0	0	0	0	0
MG: Uncharacterized protein MJ0011 OS=Methanocaldococcus jannaschii (strain ATCC 43067 / DSM 2661 / JAL-1 / JCM 10045 / NBRC 100440) GN=MJ0011 PE=4 SV=1 [Q60327] Score: 121.0	-	-	Archaea	Unknown	Euryarchaeota	Methanococci	Methanococcales	Methanocaldococcaceae	Methanocaldococcus	Methanocaldococcus jannaschii	-	0	0	0	0	0	0	2	0	0	0	0	0	0	0	0	0	0	0	0	0	0	0	0	0	0	0	0	0	0	0	0	0	0	0	0	0	0	0
MG: Uncharacterized glycosyl hydrolase MJ1610 OS=Methanocaldococcus jannaschii (strain ATCC 43067 / DSM 2661 / JAL-1 / JCM 10045 / NBRC 100440) GN=MJ1610 PE=3 SV=1 [Q59005] Score: 157.0	-	3.2.1.-	Archaea	Unknown	Euryarchaeota	Methanococci	Methanococcales	Methanocaldococcaceae	Methanocaldococcus	Methanocaldococcus jannaschii	-	0	0	0	0	0	0	0	1	0	0	0	0	0	0	0	0	0	0	0	0	0	0	0	0	0	0	0	0	0	0	0	0	0	0	0	0	0	0
MG: Probable ATP-dependent helicase MJ1401 OS=Methanocaldococcus jannaschii (strain ATCC 43067 / DSM 2661 / JAL-1 / JCM 10045 / NBRC 100440) GN=MJ1401 PE=3 SV=1 [Q58796] Score: 449.0	K03725	3.6.4.-	Archaea	Unknown	Euryarchaeota	Methanococci	Methanococcales	Methanocaldococcaceae	Methanocaldococcus	Methanocaldococcus jannaschii	-	0	0	0	0	0	0	0	0	1	0	0	0	0	0	0	0	0	0	0	0	0	0	0	0	0	0	0	0	0	0	0	0	0	0	0	0	0	0
MG: Uncharacterized MFS-type transporter MJ1317 OS=Methanocaldococcus jannaschii (strain ATCC 43067 / DSM 2661 / JAL-1 / JCM 10045 / NBRC 100440) GN=MJ1317 PE=3 SV=1 [Q58713] Score: 58.2	-	-	Archaea	Unknown	Euryarchaeota	Methanococci	Methanococcales	Methanocaldococcaceae	Methanocaldococcus	Methanocaldococcus jannaschii	-	0	0	0	0	0	0	0	0	1	0	0	0	0	0	0	0	0	0	0	0	0	0	0	0	0	0	0	0	0	0	0	0	1	2	0	0	0	0
MG: Uncharacterized protein MJ0073 OS=Methanocaldococcus jannaschii (strain ATCC 43067 / DSM 2661 / JAL-1 / JCM 10045 / NBRC 100440) GN=MJ0073 PE=4 SV=1 [Q60379] Score: 64.3	-	-	Archaea	Unknown	Euryarchaeota	Methanococci	Methanococcales	Methanocaldococcaceae	Methanocaldococcus	Methanocaldococcus jannaschii	-	0	0	0	0	0	0	0	0	1	0	0	0	0	0	0	0	0	0	0	0	0	0	0	0	0	0	0	0	0	0	0	0	0	0	0	0	0	0
MG: Thioredoxin OS=Methanocaldococcus jannaschii (strain ATCC 43067 / DSM 2661 / JAL-1 / JCM 10045 / NBRC 100440) GN=MJ0581 PE=3 SV=1 [Q58001] Score: 75.5	-	-	Archaea	Unknown	Euryarchaeota	Methanococci	Methanococcales	Methanocaldococcaceae	Methanocaldococcus	Methanocaldococcus jannaschii	-	0	0	0	0	0	0	0	0	1	1	0	0	0	0	0	0	0	0	0	0	0	0	0	0	0	0	0	0	0	0	0	0	0	0	0	0	0	0
MG: Uncharacterized protein MJ1349 OS=Methanocaldococcus jannaschii (strain ATCC 43067 / DSM 2661 / JAL-1 / JCM 10045 / NBRC 100440) GN=MJ1349 PE=3 SV=1 [Q58744] Score: 280.0	K00441	-	Archaea	Unknown	Euryarchaeota	Methanococci	Methanococcales	Methanocaldococcaceae	Methanocaldococcus	Methanocaldococcus jannaschii	-	0	0	0	0	0	0	0	0	1	0	0	0	0	0	0	0	0	0	1	0	0	0	0	0	0	0	0	0	0	0	0	0	0	0	0	0	0	0
MG: Uncharacterized ATP-binding protein MJ0283 OS=Methanocaldococcus jannaschii (strain ATCC 43067 / DSM 2661 / JAL-1 / JCM 10045 / NBRC 100440) GN=MJ0283 PE=3 SV=1 [Q57731] Score: 267.0	-	-	Archaea	Unknown	Euryarchaeota	Methanococci	Methanococcales	Methanocaldococcaceae	Methanocaldococcus	Methanocaldococcus jannaschii	-	0	0	0	0	0	0	0	0	2	1	0	0	0	0	0	0	1	3	0	0	0	0	0	0	0	0	0	0	1	0	0	0	0	0	0	0	0	0
MG: Probable arogenate/prephenate dehydrogenase OS=Methanocaldococcus jannaschii (strain ATCC 43067 / DSM 2661 / JAL-1 / JCM 10045 / NBRC 100440) GN=MJ0612 PE=3 SV=1 [Q58029] Score: 174.0	K04517	1.3.1.-	Archaea	Unknown	Euryarchaeota	Methanococci	Methanococcales	Methanocaldococcaceae	Methanocaldococcus	Methanocaldococcus jannaschii	-	0	0	0	0	0	0	0	0	1	0	4	0	2	4	3	0	5	4	4	3	0	0	0	0	0	1	1	0	2	0	0	0	0	0	0	0	0	0
MG: Probable hydrogenase nickel incorporation protein HypB OS=Methanocaldococcus jannaschii (strain ATCC 43067 / DSM 2661 / JAL-1 / JCM 10045 / NBRC 100440) GN=hypB PE=1 SV=1 [Q57884] Score: 217.0	K04652	-	Archaea	Unknown	Euryarchaeota	Methanococci	Methanococcales	Methanocaldococcaceae	Methanocaldococcus	Methanocaldococcus jannaschii	-	0	0	0	0	0	0	0	0	1	0	1	0	4	4	0	0	3	8	0	0	0	0	0	0	0	2	0	0	0	0	0	0	0	0	0	0	0	0
MG: Soluble P-type ATPase-like phosphatase OS=Methanocaldococcus jannaschii (strain ATCC 43067 / DSM 2661 / JAL-1 / JCM 10045 / NBRC 100440) GN=patS PE=1 SV=3 [Q58378] Score: 111.0	K17686	3.6.3.-	Archaea	Unknown	Euryarchaeota	Methanococci	Methanococcales	Methanocaldococcaceae	Methanocaldococcus	Methanocaldococcus jannaschii	-	0	0	0	0	0	0	0	0	8	6	7	3	4	2	6	0	3	3	0	1	0	0	0	0	0	0	0	1	0	0	0	0	0	0	0	0	0	0
MG: Uncharacterized protein MJ0802 OS=Methanocaldococcus jannaschii (strain ATCC 43067 / DSM 2661 / JAL-1 / JCM 10045 / NBRC 100440) GN=MJ0802 PE=4 SV=1 [Q58212] Score: 68.2	-	-	Archaea	Unknown	Euryarchaeota	Methanococci	Methanococcales	Methanocaldococcaceae	Methanocaldococcus	Methanocaldococcus jannaschii	-	0	0	0	0	0	0	0	0	3	2	2	0	1	4	4	0	4	5	0	0	0	0	0	0	2	0	0	1	2	0	0	0	0	0	2	0	0	0
MG: Uncharacterized protein MJ1625 OS=Methanocaldococcus jannaschii (strain ATCC 43067 / DSM 2661 / JAL-1 / JCM 10045 / NBRC 100440) GN=MJ1625 PE=4 SV=1 [Q59020] Score: 374.0	-	-	Archaea	Unknown	Euryarchaeota	Methanococci	Methanococcales	Methanocaldococcaceae	Methanocaldococcus	Methanocaldococcus jannaschii	-	0	0	0	0	0	0	0	0	1	0	0	0	0	0	0	0	0	0	0	0	0	0	0	0	0	0	0	0	0	0	0	0	0	0	0	0	0	0
MG: Zinc metalloprotease MJ0392 OS=Methanocaldococcus jannaschii (strain ATCC 43067 / DSM 2661 / JAL-1 / JCM 10045 / NBRC 100440) GN=MJ0392 PE=1 SV=1 [Q57837] Score: 196.0	-	3.4.24.-	Archaea	Unknown	Euryarchaeota	Methanococci	Methanococcales	Methanocaldococcaceae	Methanocaldococcus	Methanocaldococcus jannaschii	-	0	0	0	0	0	0	0	0	2	0	0	0	0	0	0	0	0	0	0	0	0	0	0	0	0	0	0	0	0	0	0	0	0	0	0	0	0	0
MG: Uncharacterized protein MJ0870 OS=Methanocaldococcus jannaschii (strain ATCC 43067 / DSM 2661 / JAL-1 / JCM 10045 / NBRC 100440) GN=MJ0870 PE=3 SV=1 [Q58280] Score: 58.2	K00441	-	Archaea	Unknown	Euryarchaeota	Methanococci	Methanococcales	Methanocaldococcaceae	Methanocaldococcus	Methanocaldococcus jannaschii	-	0	0	0	0	0	0	0	0	1	0	0	0	1	0	0	1	0	0	1	0	0	0	0	0	0	0	0	0	0	0	0	0	0	0	0	0	0	0
MG: Uncharacterized protein MJ0120 OS=Methanocaldococcus jannaschii (strain ATCC 43067 / DSM 2661 / JAL-1 / JCM 10045 / NBRC 100440) GN=MJ0120 PE=4 SV=1 [Q57584] Score: 192.0	-	-	Archaea	Unknown	Euryarchaeota	Methanococci	Methanococcales	Methanocaldococcaceae	Methanocaldococcus	Methanocaldococcus jannaschii	-	0	0	0	0	0	0	0	0	2	1	0	0	0	0	1	4	0	1	0	0	0	0	0	0	0	0	0	0	0	1	0	0	0	0	0	0	0	0
MG: Modification methylase MjaII OS=Methanocaldococcus jannaschii (strain ATCC 43067 / DSM 2661 / JAL-1 / JCM 10045 / NBRC 100440) GN=mjaIIM PE=1 SV=1 [Q58843] Score: 50.4	-	2.1.1.113	Archaea	Unknown	Euryarchaeota	Methanococci	Methanococcales	Methanocaldococcaceae	Methanocaldococcus	Methanocaldococcus jannaschii	-	0	0	0	0	0	0	0	0	1	0	0	0	0	0	0	0	0	0	0	1	0	0	3	1	0	0	0	0	0	1	0	0	0	1	1	0	1	0
MG: Uncharacterized protein MJ1531 OS=Methanocaldococcus jannaschii (strain ATCC 43067 / DSM 2661 / JAL-1 / JCM 10045 / NBRC 100440) GN=MJ1531 PE=4 SV=1 [Q58926] Score: 82.0	K01154	-	Archaea	Unknown	Euryarchaeota	Methanococci	Methanococcales	Methanocaldococcaceae	Methanocaldococcus	Methanocaldococcus jannaschii	-	0	0	0	0	0	0	0	0	1	1	2	1	0	0	0	0	0	0	0	0	0	0	0	0	0	0	0	0	0	0	0	0	0	0	0	0	0	0
MG: Uncharacterized transporter MJ0456 OS=Methanocaldococcus jannaschii (strain ATCC 43067 / DSM 2661 / JAL-1 / JCM 10045 / NBRC 100440) GN=MJ0456 PE=3 SV=1 [Q57898] Score: 129.0	-	-	Archaea	Unknown	Euryarchaeota	Methanococci	Methanococcales	Methanocaldococcaceae	Methanocaldococcus	Methanocaldococcus jannaschii	-	0	0	0	0	0	0	0	0	1	0	0	0	0	0	0	0	0	0	0	0	0	0	0	0	0	0	0	0	0	0	0	0	0	0	0	0	0	0
MG: Chorismate mutase OS=Methanocaldococcus jannaschii (strain ATCC 43067 / DSM 2661 / JAL-1 / JCM 10045 / NBRC 100440) GN=aroQ PE=1 SV=1 [Q57696] Score: 53.9	K04093	5.4.99.5	Archaea	Unknown	Euryarchaeota	Methanococci	Methanococcales	Methanocaldococcaceae	Methanocaldococcus	Methanocaldococcus jannaschii	-	0	0	0	0	0	0	0	0	1	1	0	0	0	0	0	0	0	0	0	0	0	0	0	0	0	0	0	0	0	0	0	0	0	0	0	0	0	0
MG: Putative NADH oxidase OS=Methanocaldococcus jannaschii (strain ATCC 43067 / DSM 2661 / JAL-1 / JCM 10045 / NBRC 100440) GN=MJ0649 PE=3 SV=2 [Q58065] Score: 275.0	K17870	1.6.99.3	Archaea	Unknown	Euryarchaeota	Methanococci	Methanococcales	Methanocaldococcaceae	Methanocaldococcus	Methanocaldococcus jannaschii	-	0	0	0	0	0	0	0	0	0	1	0	0	0	0	1	0	0	0	1	1	1	2	3	1	0	0	0	0	0	0	0	0	0	0	0	0	0	0
MG: Uncharacterized protein MJ0202 OS=Methanocaldococcus jannaschii (strain ATCC 43067 / DSM 2661 / JAL-1 / JCM 10045 / NBRC 100440) GN=MJ0202 PE=4 SV=1 [Q57655] Score: 148.0	K09116	-	Archaea	Unknown	Euryarchaeota	Methanococci	Methanococcales	Methanocaldococcaceae	Methanocaldococcus	Methanocaldococcus jannaschii	-	0	0	0	0	0	0	0	0	0	1	0	0	0	0	0	0	0	0	0	0	0	0	0	0	0	0	0	0	0	0	0	0	0	0	0	0	0	0
MG: Uncharacterized ABC transporter ATP-binding protein MJ0873 OS=Methanocaldococcus jannaschii (strain ATCC 43067 / DSM 2661 / JAL-1 / JCM 10045 / NBRC 100440) GN=MJ0873 PE=3 SV=4 [Q58283] Score: 97.8	K02013	-	Archaea	Unknown	Euryarchaeota	Methanococci	Methanococcales	Methanocaldococcaceae	Methanocaldococcus	Methanocaldococcus jannaschii	-	0	0	0	0	0	0	0	0	0	1	0	0	2	0	0	0	0	0	0	0	0	0	0	1	0	0	0	0	0	0	0	0	0	0	0	0	0	0
MG: Uncharacterized protein MJ0319 OS=Methanocaldococcus jannaschii (strain ATCC 43067 / DSM 2661 / JAL-1 / JCM 10045 / NBRC 100440) GN=MJ0319 PE=4 SV=1 [Q57767] Score: 112.0	K09732	-	Archaea	Unknown	Euryarchaeota	Methanococci	Methanococcales	Methanocaldococcaceae	Methanocaldococcus	Methanocaldococcus jannaschii	-	0	0	0	0	0	0	0	0	0	1	0	0	0	0	0	0	0	0	0	0	0	0	0	0	0	0	0	0	0	0	0	0	0	0	0	0	0	0
MG: Uncharacterized protein MJ0907 OS=Methanocaldococcus jannaschii (strain ATCC 43067 / DSM 2661 / JAL-1 / JCM 10045 / NBRC 100440) GN=MJ0907 PE=3 SV=1 [Q58317] Score: 70.5	K06871	-	Archaea	Unknown	Euryarchaeota	Methanococci	Methanococcales	Methanocaldococcaceae	Methanocaldococcus	Methanocaldococcus jannaschii	-	0	0	0	0	0	0	0	0	0	1	0	0	0	0	0	0	0	0	0	0	0	0	0	0	0	0	0	0	0	0	0	1	0	0	0	0	0	0
MG: Uncharacterized protein MJ1587 OS=Methanocaldococcus jannaschii (strain ATCC 43067 / DSM 2661 / JAL-1 / JCM 10045 / NBRC 100440) GN=MJ1587 PE=4 SV=1 [Q58982] Score: 46.2	K07053	-	Archaea	Unknown	Euryarchaeota	Methanococci	Methanococcales	Methanocaldococcaceae	Methanocaldococcus	Methanocaldococcus jannaschii	-	0	0	0	0	0	0	0	0	0	0	1	0	0	0	0	0	0	1	1	0	0	0	0	0	0	0	0	0	0	0	0	0	0	0	0	0	0	0
MG: Putative 26S protease regulatory subunit homolog MJ1494 OS=Methanocaldococcus jannaschii (strain ATCC 43067 / DSM 2661 / JAL-1 / JCM 10045 / NBRC 100440) GN=MJ1494 PE=3 SV=2 [Q58889] Score: 49.3	K07392	-	Archaea	Unknown	Euryarchaeota	Methanococci	Methanococcales	Methanocaldococcaceae	Methanocaldococcus	Methanocaldococcus jannaschii	-	0	0	0	0	0	0	0	0	0	0	1	0	0	0	0	0	0	0	0	0	0	0	0	0	0	0	0	0	0	0	0	0	0	0	0	0	0	0
MG: Uncharacterized protein MJ0100 OS=Methanocaldococcus jannaschii (strain ATCC 43067 / DSM 2661 / JAL-1 / JCM 10045 / NBRC 100440) GN=MJ0100 PE=1 SV=1 [Q57564] Score: 382.0	-	-	Archaea	Unknown	Euryarchaeota	Methanococci	Methanococcales	Methanocaldococcaceae	Methanocaldococcus	Methanocaldococcus jannaschii	-	0	0	0	0	0	0	0	0	0	0	0	1	0	1	0	0	0	0	0	0	0	0	0	0	0	0	0	0	0	0	0	0	0	0	0	0	0	0
MG: Uncharacterized protein MJ0578 OS=Methanocaldococcus jannaschii (strain ATCC 43067 / DSM 2661 / JAL-1 / JCM 10045 / NBRC 100440) GN=MJ0578 PE=3 SV=1 [Q57998] Score: 99.0	-	-	Archaea	Unknown	Euryarchaeota	Methanococci	Methanococcales	Methanocaldococcaceae	Methanocaldococcus	Methanocaldococcus jannaschii	-	0	0	0	0	0	0	0	0	0	0	0	1	0	1	0	0	0	0	1	3	0	0	0	0	0	1	0	0	0	0	0	0	1	0	0	0	0	1
Y1325_METJA Uncharacterized HTH-type transcriptional regulator MJ1325 OS=Methanocaldococcus jannaschii (strain ATCC 43067 / DSM 2661 / JAL-1 / JCM 10045 / NBRC 100440) GN=MJ1325 PE=3 SV=1	K03892	-	Archaea	Unknown	Euryarchaeota	Methanococci	Methanococcales	Methanocaldococcaceae	Methanocaldococcus	Methanocaldococcus jannaschii	-	0	0	0	0	0	0	0	0	0	0	0	2	0	0	0	0	0	0	0	0	6	4	0	0	0	0	0	0	2	3	1	4	0	0	0	0	0	0
MG: Uncharacterized protein MJ1628 OS=Methanocaldococcus jannaschii (strain ATCC 43067 / DSM 2661 / JAL-1 / JCM 10045 / NBRC 100440) GN=MJ1628 PE=4 SV=1 [Q59022] Score: 90.9	K06924	-	Archaea	Unknown	Euryarchaeota	Methanococci	Methanococcales	Methanocaldococcaceae	Methanocaldococcus	Methanocaldococcus jannaschii	-	0	0	0	0	0	0	0	0	0	0	0	0	2	1	1	0	0	0	0	0	0	0	0	0	0	0	0	0	1	0	0	0	0	0	0	0	0	0
MG: Chlorinase MJ1651 OS=Methanocaldococcus jannaschii (strain ATCC 43067 / DSM 2661 / JAL-1 / JCM 10045 / NBRC 100440) GN=MJ1651 PE=1 SV=1 [Q59045] Score: 130.0	K09134	2.5.1.-	Archaea	Unknown	Euryarchaeota	Methanococci	Methanococcales	Methanocaldococcaceae	Methanocaldococcus	Methanocaldococcus jannaschii	-	0	0	0	0	0	0	0	0	0	0	0	0	4	8	5	8	2	5	4	4	0	0	0	0	0	0	0	0	0	0	0	0	0	0	0	0	0	0
MG: Uncharacterized metallohydrolase MJ0457 OS=Methanocaldococcus jannaschii (strain ATCC 43067 / DSM 2661 / JAL-1 / JCM 10045 / NBRC 100440) GN=MJ0457 PE=3 SV=1 [Q57899] Score: 235.0	K01439	3.-.-.-	Archaea	Unknown	Euryarchaeota	Methanococci	Methanococcales	Methanocaldococcaceae	Methanocaldococcus	Methanocaldococcus jannaschii	-	0	0	0	0	0	0	0	0	0	0	0	0	1	2	1	0	2	2	0	0	0	0	0	0	0	0	0	0	0	0	0	0	0	0	0	0	0	0
MG: Uncharacterized protein MJ1623 OS=Methanocaldococcus jannaschii (strain ATCC 43067 / DSM 2661 / JAL-1 / JCM 10045 / NBRC 100440) GN=MJ1623 PE=4 SV=1 [Q59017] Score: 75.1	-	-	Archaea	Unknown	Euryarchaeota	Methanococci	Methanococcales	Methanocaldococcaceae	Methanocaldococcus	Methanocaldococcus jannaschii	-	0	0	0	0	0	0	0	0	0	0	0	0	1	0	3	0	0	0	0	0	0	0	0	0	0	0	0	0	0	0	0	0	0	0	0	0	0	0
Y1641_METJA Uncharacterized protein MJ1641 OS=Methanocaldococcus jannaschii (strain ATCC 43067 / DSM 2661 / JAL-1 / JCM 10045 / NBRC 100440) GN=MJ1641 PE=4 SV=1	K02039	-	Archaea	Unknown	Euryarchaeota	Methanococci	Methanococcales	Methanocaldococcaceae	Methanocaldococcus	Methanocaldococcus jannaschii	-	0	0	0	0	0	0	0	0	0	0	0	0	2	4	5	0	4	3	6	0	0	0	0	0	0	0	0	0	0	0	0	0	0	0	0	0	0	0
MG: CRISPR type III-associated RAMP protein Csm5 OS=Methanocaldococcus jannaschii (strain ATCC 43067 / DSM 2661 / JAL-1 / JCM 10045 / NBRC 100440) GN=csm5 PE=3 SV=1 [Q59061] Score: 103.0	K19140	-	Archaea	Unknown	Euryarchaeota	Methanococci	Methanococcales	Methanocaldococcaceae	Methanocaldococcus	Methanocaldococcus jannaschii	-	0	0	0	0	0	0	0	0	0	0	0	0	9	3	3	7	2	4	3	0	0	0	0	0	0	0	0	0	0	0	0	0	0	0	0	0	0	0
MG: Uncharacterized protein MJ0119 OS=Methanocaldococcus jannaschii (strain ATCC 43067 / DSM 2661 / JAL-1 / JCM 10045 / NBRC 100440) GN=MJ0119 PE=4 SV=1 [Q57583] Score: 254.0	K06939	-	Archaea	Unknown	Euryarchaeota	Methanococci	Methanococcales	Methanocaldococcaceae	Methanocaldococcus	Methanocaldococcus jannaschii	-	0	0	0	0	0	0	0	0	0	0	0	0	14	6	8	4	6	7	4	2	0	0	0	0	0	0	0	0	0	0	0	0	0	0	0	0	0	0
MG: Uncharacterized protein MJ0009 OS=Methanocaldococcus jannaschii (strain ATCC 43067 / DSM 2661 / JAL-1 / JCM 10045 / NBRC 100440) GN=MJ0009 PE=4 SV=1 [Q60320] Score: 204.0	-	-	Archaea	Unknown	Euryarchaeota	Methanococci	Methanococcales	Methanocaldococcaceae	Methanocaldococcus	Methanocaldococcus jannaschii	-	0	0	0	0	0	0	0	0	0	0	0	0	1	0	0	2	0	0	0	0	0	0	0	0	0	0	0	0	0	0	0	0	0	0	0	0	0	0
MG: Non-canonical purine NTP pyrophosphatase OS=Methanocaldococcus jannaschii (strain ATCC 43067 / DSM 2661 / JAL-1 / JCM 10045 / NBRC 100440) GN=MJ0226 PE=1 SV=2 [Q57679] Score: 157.0	K02428	3.6.1.19	Archaea	Unknown	Euryarchaeota	Methanococci	Methanococcales	Methanocaldococcaceae	Methanocaldococcus	Methanocaldococcus jannaschii	-	0	0	0	0	0	0	0	0	0	0	0	0	1	0	0	0	0	0	0	0	0	0	0	0	0	0	0	0	0	0	0	0	0	0	0	0	0	0
MG: Uncharacterized protein MJ1511 OS=Methanocaldococcus jannaschii (strain ATCC 43067 / DSM 2661 / JAL-1 / JCM 10045 / NBRC 100440) GN=MJ1511 PE=4 SV=1 [Q58906] Score: 46.2	-	-	Archaea	Unknown	Euryarchaeota	Methanococci	Methanococcales	Methanocaldococcaceae	Methanocaldococcus	Methanocaldococcus jannaschii	-	0	0	0	0	0	0	0	0	0	0	0	0	18	7	11	20	17	16	4	15	0	0	0	0	0	2	3	3	11	6	3	5	0	0	0	0	4	4
MG: CRISPR-associated protein Csx1 2 OS=Methanocaldococcus jannaschii (strain ATCC 43067 / DSM 2661 / JAL-1 / JCM 10045 / NBRC 100440) GN=csx1b PE=3 SV=1 [Q59068] Score: 321.0	-	-	Archaea	Unknown	Euryarchaeota	Methanococci	Methanococcales	Methanocaldococcaceae	Methanocaldococcus	Methanocaldococcus jannaschii	-	0	0	0	0	0	0	0	0	0	0	0	0	10	10	17	6	5	6	0	6	0	0	0	0	0	0	0	0	0	0	0	0	0	0	0	0	0	1
MG: Uncharacterized protein MJ0841 OS=Methanocaldococcus jannaschii (strain ATCC 43067 / DSM 2661 / JAL-1 / JCM 10045 / NBRC 100440) GN=MJ0841 PE=4 SV=1 [Q58251] Score: 60.8	-	-	Archaea	Unknown	Euryarchaeota	Methanococci	Methanococcales	Methanocaldococcaceae	Methanocaldococcus	Methanocaldococcus jannaschii	-	0	0	0	0	0	0	0	0	0	0	0	0	2	1	0	0	0	0	0	0	2	1	1	1	0	0	0	0	0	0	0	0	0	0	0	0	0	0
Y1110_METJA Uncharacterized protein MJ1110 OS=Methanocaldococcus jannaschii (strain ATCC 43067 / DSM 2661 / JAL-1 / JCM 10045 / NBRC 100440) GN=MJ1110 PE=4 SV=1	K09724	-	Archaea	Unknown	Euryarchaeota	Methanococci	Methanococcales	Methanocaldococcaceae	Methanocaldococcus	Methanocaldococcus jannaschii	-	0	0	0	0	0	0	0	0	0	0	0	0	1	0	0	0	0	0	0	0	0	0	0	0	0	0	0	0	0	0	0	0	0	0	0	0	0	0
MG: RIO-type serine/threonine-protein kinase Rio2 OS=Methanocaldococcus jannaschii (strain ATCC 43067 / DSM 2661 / JAL-1 / JCM 10045 / NBRC 100440) GN=rio2 PE=3 SV=1 [Q58473] Score: 189.0	K07179	2.7.11.1	Archaea	Unknown	Euryarchaeota	Methanococci	Methanococcales	Methanocaldococcaceae	Methanocaldococcus	Methanocaldococcus jannaschii	-	0	0	0	0	0	0	0	0	0	0	0	0	2	2	0	0	1	0	0	0	0	0	0	0	0	0	0	0	0	0	0	0	0	0	0	0	0	0
MG: Uncharacterized protein MJ1230 OS=Methanocaldococcus jannaschii (strain ATCC 43067 / DSM 2661 / JAL-1 / JCM 10045 / NBRC 100440) GN=MJ1230 PE=4 SV=1 [Q58627] Score: 72.4	K07069	-	Archaea	Unknown	Euryarchaeota	Methanococci	Methanococcales	Methanocaldococcaceae	Methanocaldococcus	Methanocaldococcus jannaschii	-	0	0	0	0	0	0	0	0	0	0	0	0	8	4	0	0	2	6	1	1	0	0	0	0	0	0	0	0	0	0	0	0	0	0	0	0	0	0
MG: Metalloprotease MJ0996 OS=Methanocaldococcus jannaschii (strain ATCC 43067 / DSM 2661 / JAL-1 / JCM 10045 / NBRC 100440) GN=MJ0996 PE=3 SV=2 [Q58403] Score: 151.0	K03568	3.4.-.-	Archaea	Unknown	Euryarchaeota	Methanococci	Methanococcales	Methanocaldococcaceae	Methanocaldococcus	Methanocaldococcus jannaschii	-	0	0	0	0	0	0	0	0	0	0	0	0	2	3	1	0	0	0	0	0	0	0	0	0	0	0	0	0	0	0	0	0	0	0	0	0	0	0
MG: Ferrous iron transport protein B homolog OS=Methanocaldococcus jannaschii (strain ATCC 43067 / DSM 2661 / JAL-1 / JCM 10045 / NBRC 100440) GN=MJ0566 PE=1 SV=1 [Q57986] Score: 189.0	K04759	-	Archaea	Unknown	Euryarchaeota	Methanococci	Methanococcales	Methanocaldococcaceae	Methanocaldococcus	Methanocaldococcus jannaschii	-	0	0	0	0	0	0	0	0	0	0	0	0	4	0	2	2	2	1	1	0	0	0	1	0	0	0	0	0	0	0	0	0	0	0	0	1	0	0
MG: Uncharacterized glycosyltransferase MJ1178 OS=Methanocaldococcus jannaschii (strain ATCC 43067 / DSM 2661 / JAL-1 / JCM 10045 / NBRC 100440) GN=MJ1178 PE=3 SV=1 [Q58577] Score: 76.3	-	2.4.-.-	Archaea	Unknown	Euryarchaeota	Methanococci	Methanococcales	Methanocaldococcaceae	Methanocaldococcus	Methanocaldococcus jannaschii	-	0	0	0	0	0	0	0	0	0	0	0	0	1	0	0	0	0	0	0	0	0	1	0	1	1	2	2	0	0	0	0	0	7	1	2	7	3	3
MG: Uncharacterized protein MJ1062 OS=Methanocaldococcus jannaschii (strain ATCC 43067 / DSM 2661 / JAL-1 / JCM 10045 / NBRC 100440) GN=MJ1062 PE=1 SV=1 [Q58462] Score: 71.2	-	-	Archaea	Unknown	Euryarchaeota	Methanococci	Methanococcales	Methanocaldococcaceae	Methanocaldococcus	Methanocaldococcus jannaschii	-	0	0	0	0	0	0	0	0	0	0	0	0	1	0	0	0	0	0	0	0	0	0	0	0	0	0	0	0	0	0	0	0	0	0	0	0	0	0
MG: Uncharacterized protein MJ0548 OS=Methanocaldococcus jannaschii (strain ATCC 43067 / DSM 2661 / JAL-1 / JCM 10045 / NBRC 100440) GN=MJ0548 PE=4 SV=1 [Q57968] Score: 140.0	-	-	Archaea	Unknown	Euryarchaeota	Methanococci	Methanococcales	Methanocaldococcaceae	Methanocaldococcus	Methanocaldococcus jannaschii	-	0	0	0	0	0	0	0	0	0	0	0	0	1	0	0	0	0	0	0	0	0	0	0	0	0	0	0	0	0	0	0	0	0	0	0	0	0	0
MG: Diaminopimelate decarboxylase OS=Methanocaldococcus jannaschii (strain ATCC 43067 / DSM 2661 / JAL-1 / JCM 10045 / NBRC 100440) GN=lysA PE=1 SV=1 [Q58497] Score: 116.0	K01586	4.1.1.20	Archaea	Unknown	Euryarchaeota	Methanococci	Methanococcales	Methanocaldococcaceae	Methanocaldococcus	Methanocaldococcus jannaschii	-	0	0	0	0	0	0	0	0	0	0	0	0	2	0	0	2	0	0	1	2	0	1	0	0	0	0	0	0	0	0	0	0	0	0	0	0	0	0
CBIA_METJA Cobyrinate a,c-diamide synthase OS=Methanocaldococcus jannaschii (strain ATCC 43067 / DSM 2661 / JAL-1 / JCM 10045 / NBRC 100440) GN=cbiA PE=3 SV=1	K02224	6.3.5.11	Archaea	Unknown	Euryarchaeota	Methanococci	Methanococcales	Methanocaldococcaceae	Methanocaldococcus	Methanocaldococcus jannaschii	-	0	0	0	0	0	0	0	0	0	0	0	0	2	0	0	0	0	0	0	0	0	0	0	0	0	0	0	0	0	0	0	0	0	0	0	0	0	0
MG: Uncharacterized protein MJ1637 OS=Methanocaldococcus jannaschii (strain ATCC 43067 / DSM 2661 / JAL-1 / JCM 10045 / NBRC 100440) GN=MJ1637 PE=3 SV=1 [Q59031] Score: 72.0	K07133	-	Archaea	Unknown	Euryarchaeota	Methanococci	Methanococcales	Methanocaldococcaceae	Methanocaldococcus	Methanocaldococcus jannaschii	-	0	0	0	0	0	0	0	0	0	0	0	0	1	0	0	0	0	0	0	0	0	0	1	0	0	0	0	0	0	0	0	1	0	0	0	0	0	0
Y501_METJA Uncharacterized protein MJ0501 OS=Methanocaldococcus jannaschii (strain ATCC 43067 / DSM 2661 / JAL-1 / JCM 10045 / NBRC 100440) GN=MJ0501 PE=4 SV=1	-	-	Archaea	Unknown	Euryarchaeota	Methanococci	Methanococcales	Methanocaldococcaceae	Methanocaldococcus	Methanocaldococcus jannaschii	-	0	0	0	0	0	0	0	0	0	0	0	0	1	0	0	0	0	0	0	0	0	0	0	0	0	0	0	0	0	0	0	0	0	0	0	0	0	0
YE7B_METJA Uncharacterized protein MJ1479.1 OS=Methanocaldococcus jannaschii (strain ATCC 43067 / DSM 2661 / JAL-1 / JCM 10045 / NBRC 100440) GN=MJ1479.1 PE=4 SV=1	K09160	-	Archaea	Unknown	Euryarchaeota	Methanococci	Methanococcales	Methanocaldococcaceae	Methanocaldococcus	Methanocaldococcus jannaschii	-	0	0	0	0	0	0	0	0	0	0	0	0	1	0	0	0	0	0	0	0	0	0	0	0	0	0	0	0	0	0	0	0	0	0	0	0	0	0
MG: DNA-directed RNA polymerase subunit A'' OS=Methanocaldococcus jannaschii (strain ATCC 43067 / DSM 2661 / JAL-1 / JCM 10045 / NBRC 100440) GN=rpoA2 PE=3 SV=1 [Q58446] Score: 61.6	K03042	2.7.7.6	Archaea	Unknown	Euryarchaeota	Methanococci	Methanococcales	Methanocaldococcaceae	Methanocaldococcus	Methanocaldococcus jannaschii	-	0	0	0	0	0	0	0	0	0	0	0	0	1	0	0	0	0	0	0	0	0	0	0	0	0	0	0	0	0	0	0	0	0	0	0	0	0	0
MG: Uncharacterized protein MJ0448 OS=Methanocaldococcus jannaschii (strain ATCC 43067 / DSM 2661 / JAL-1 / JCM 10045 / NBRC 100440) GN=MJ0448 PE=3 SV=1 [Q57890] Score: 119.0	K06897	-	Archaea	Unknown	Euryarchaeota	Methanococci	Methanococcales	Methanocaldococcaceae	Methanocaldococcus	Methanocaldococcus jannaschii	-	0	0	0	0	0	0	0	0	0	0	0	0	2	0	1	0	0	1	0	0	0	0	0	0	0	0	0	0	0	0	0	0	0	0	0	0	0	0
MG: Uncharacterized protein MJ1374 OS=Methanocaldococcus jannaschii (strain ATCC 43067 / DSM 2661 / JAL-1 / JCM 10045 / NBRC 100440) GN=MJ1374 PE=4 SV=1 [Q58769] Score: 206.0	-	-	Archaea	Unknown	Euryarchaeota	Methanococci	Methanococcales	Methanocaldococcaceae	Methanocaldococcus	Methanocaldococcus jannaschii	-	0	0	0	0	0	0	0	0	0	0	0	0	0	1	0	0	0	0	0	0	0	0	0	0	0	0	0	0	0	0	0	0	0	0	0	0	0	0
MG: tRNA(Phe) (4-demethylwyosine(37)-C(7)) aminocarboxypropyltransferase OS=Methanocaldococcus jannaschii (strain ATCC 43067 / DSM 2661 / JAL-1 / JCM 10045 / NBRC 100440) GN=taw2 PE=1 SV=1 [Q58952] Score: 130.0	K07055	2.5.1.114	Archaea	Unknown	Euryarchaeota	Methanococci	Methanococcales	Methanocaldococcaceae	Methanocaldococcus	Methanocaldococcus jannaschii	-	0	0	0	0	0	0	0	0	0	0	0	0	0	1	0	0	2	1	0	0	0	0	0	0	0	0	0	0	0	0	0	0	0	0	0	0	0	0
MG: Putative superoxide reductase OS=Methanocaldococcus jannaschii (strain ATCC 43067 / DSM 2661 / JAL-1 / JCM 10045 / NBRC 100440) GN=MJ0741 PE=3 SV=1 [Q58151] Score: 88.2	K05919	1.15.1.2	Archaea	Unknown	Euryarchaeota	Methanococci	Methanococcales	Methanocaldococcaceae	Methanocaldococcus	Methanocaldococcus jannaschii	-	0	0	0	0	0	0	0	0	0	0	0	0	0	1	0	0	1	1	0	0	0	0	0	0	0	0	0	0	0	0	0	0	0	0	0	0	0	0
MG: RNA 2',3'-cyclic phosphodiesterase OS=Methanocaldococcus jannaschii (strain ATCC 43067 / DSM 2661 / JAL-1 / JCM 10045 / NBRC 100440) GN=MJ1568 PE=3 SV=1 [Q58963] Score: 100.0	K01975	3.1.4.-	Archaea	Unknown	Euryarchaeota	Methanococci	Methanococcales	Methanocaldococcaceae	Methanocaldococcus	Methanocaldococcus jannaschii	-	0	0	0	0	0	0	0	0	0	0	0	0	0	2	1	0	0	0	0	0	0	0	0	0	0	0	0	0	0	0	0	0	0	0	0	0	0	0
SYV_METJA Valine--tRNA ligase OS=Methanocaldococcus jannaschii (strain ATCC 43067 / DSM 2661 / JAL-1 / JCM 10045 / NBRC 100440) GN=valS PE=3 SV=1	K01873	6.1.1.9	Archaea	Unknown	Euryarchaeota	Methanococci	Methanococcales	Methanocaldococcaceae	Methanocaldococcus	Methanocaldococcus jannaschii	-	0	0	0	0	0	0	0	0	0	0	0	0	0	1	0	0	0	0	0	0	0	0	0	0	0	0	0	0	0	0	0	0	0	0	0	0	0	0
MG: Uncharacterized protein MJ0912 OS=Methanocaldococcus jannaschii (strain ATCC 43067 / DSM 2661 / JAL-1 / JCM 10045 / NBRC 100440) GN=MJ0912 PE=4 SV=1 [Q58322] Score: 147.0	-	-	Archaea	Unknown	Euryarchaeota	Methanococci	Methanococcales	Methanocaldococcaceae	Methanocaldococcus	Methanocaldococcus jannaschii	-	0	0	0	0	0	0	0	0	0	0	0	0	0	0	1	0	1	0	0	0	0	0	0	0	1	0	0	0	0	0	0	0	0	0	0	0	0	0
MG: Putative alpha-amylase OS=Methanocaldococcus jannaschii (strain ATCC 43067 / DSM 2661 / JAL-1 / JCM 10045 / NBRC 100440) GN=MJ1611 PE=3 SV=1 [Q59006] Score: 165.0	K07405	3.2.1.1	Archaea	Unknown	Euryarchaeota	Methanococci	Methanococcales	Methanocaldococcaceae	Methanocaldococcus	Methanocaldococcus jannaschii	-	0	0	0	0	0	0	0	0	0	0	0	0	0	0	1	0	0	0	0	0	0	0	0	1	0	0	0	0	5	3	2	3	2	2	0	0	0	0
TRM1_METJA tRNA (guanine(26)-N(2))-dimethyltransferase OS=Methanocaldococcus jannaschii (strain ATCC 43067 / DSM 2661 / JAL-1 / JCM 10045 / NBRC 100440) GN=trm1 PE=3 SV=1	K00555	2.1.1.216	Archaea	Unknown	Euryarchaeota	Methanococci	Methanococcales	Methanocaldococcaceae	Methanocaldococcus	Methanocaldococcus jannaschii	-	0	0	0	0	0	0	0	0	0	0	0	0	0	0	1	0	0	0	0	0	0	0	0	0	0	0	0	0	0	0	0	0	0	0	0	0	0	0
MG: Uncharacterized protein MJ0124 OS=Methanocaldococcus jannaschii (strain ATCC 43067 / DSM 2661 / JAL-1 / JCM 10045 / NBRC 100440) GN=MJ0124 PE=4 SV=2 [Q57588] Score: 175.0	-	-	Archaea	Unknown	Euryarchaeota	Methanococci	Methanococcales	Methanocaldococcaceae	Methanocaldococcus	Methanocaldococcus jannaschii	-	0	0	0	0	0	0	0	0	0	0	0	0	0	0	2	0	0	1	2	3	0	0	0	0	0	0	0	0	0	0	0	0	0	0	0	0	0	0
MG: Uncharacterized ABC transporter ATP-binding protein MJ0121 OS=Methanocaldococcus jannaschii (strain ATCC 43067 / DSM 2661 / JAL-1 / JCM 10045 / NBRC 100440) GN=MJ0121 PE=3 SV=1 [Q57585] Score: 212.0	-	-	Archaea	Unknown	Euryarchaeota	Methanococci	Methanococcales	Methanocaldococcaceae	Methanocaldococcus	Methanocaldococcus jannaschii	-	0	0	0	0	0	0	0	0	0	0	0	0	0	0	2	0	0	0	0	0	0	0	0	0	0	0	0	0	0	0	0	0	0	0	0	0	0	0
MG: Putative asparagine synthetase [glutamine-hydrolyzing] 1 OS=Methanocaldococcus jannaschii (strain ATCC 43067 / DSM 2661 / JAL-1 / JCM 10045 / NBRC 100440) GN=MJ1116 PE=3 SV=1 [Q58516] Score: 101.0	K01953	6.3.5.4	Archaea	Unknown	Euryarchaeota	Methanococci	Methanococcales	Methanocaldococcaceae	Methanocaldococcus	Methanocaldococcus jannaschii	-	0	0	0	0	0	0	0	0	0	0	0	0	0	0	1	0	0	0	0	0	0	0	0	0	0	0	0	0	0	0	0	0	0	0	0	0	0	0
MG: Uncharacterized protein MJ1162 OS=Methanocaldococcus jannaschii (strain ATCC 43067 / DSM 2661 / JAL-1 / JCM 10045 / NBRC 100440) GN=MJ1162 PE=4 SV=1 [Q58562] Score: 123.0	K07096	-	Archaea	Unknown	Euryarchaeota	Methanococci	Methanococcales	Methanocaldococcaceae	Methanocaldococcus	Methanocaldococcus jannaschii	-	0	0	0	0	0	0	0	0	0	0	0	0	0	0	1	0	6	0	0	0	0	0	0	0	2	0	0	0	0	0	0	0	0	0	0	0	0	0
Y21B_METJA Uncharacterized protein MJ0210.1 OS=Methanocaldococcus jannaschii (strain ATCC 43067 / DSM 2661 / JAL-1 / JCM 10045 / NBRC 100440) GN=MJ0210.1 PE=4 SV=1	-	-	Archaea	Unknown	Euryarchaeota	Methanococci	Methanococcales	Methanocaldococcaceae	Methanocaldococcus	Methanocaldococcus jannaschii	-	0	0	0	0	0	0	0	0	0	0	0	0	0	0	0	1	0	1	0	1	0	0	0	0	0	0	0	0	0	1	0	0	0	0	0	0	0	0
MG: Uncharacterized protein MJ0922 OS=Methanocaldococcus jannaschii (strain ATCC 43067 / DSM 2661 / JAL-1 / JCM 10045 / NBRC 100440) GN=MJ0922 PE=1 SV=1 [Q58332] Score: 47.8	-	-	Archaea	Unknown	Euryarchaeota	Methanococci	Methanococcales	Methanocaldococcaceae	Methanocaldococcus	Methanocaldococcus jannaschii	-	0	0	0	0	0	0	0	0	0	0	0	0	0	0	0	1	0	0	0	0	0	0	0	0	0	0	0	0	0	0	0	0	0	0	0	0	0	0
MG: F420-non-reducing hydrogenase vhu iron-sulfur subunit D OS=Methanocaldococcus jannaschii (strain ATCC 43067 / DSM 2661 / JAL-1 / JCM 10045 / NBRC 100440) GN=vhuD PE=3 SV=3 [P81334] Score: 98.2	-	1.12.99.-	Archaea	Unknown	Euryarchaeota	Methanococci	Methanococcales	Methanocaldococcaceae	Methanocaldococcus	Methanocaldococcus jannaschii	-	0	0	0	0	0	0	0	0	0	0	0	0	0	0	0	0	1	0	0	0	0	0	0	0	0	0	0	0	0	0	0	0	0	0	0	0	0	0
MG: Uncharacterized protein MJ1002 OS=Methanocaldococcus jannaschii (strain ATCC 43067 / DSM 2661 / JAL-1 / JCM 10045 / NBRC 100440) GN=MJ1002 PE=4 SV=1 [Q58408] Score: 125.0	-	-	Archaea	Unknown	Euryarchaeota	Methanococci	Methanococcales	Methanocaldococcaceae	Methanocaldococcus	Methanocaldococcus jannaschii	-	0	0	0	0	0	0	0	0	0	0	0	0	0	0	0	0	1	0	0	0	0	0	0	0	0	0	0	0	0	0	0	0	0	0	0	0	0	0
MG: Polyribonucleotide 5'-hydroxyl-kinase MJ1315 OS=Methanocaldococcus jannaschii (strain ATCC 43067 / DSM 2661 / JAL-1 / JCM 10045 / NBRC 100440) GN=MJ1315 PE=3 SV=1 [Q58711] Score: 102.0	K06947	2.7.1.78	Archaea	Unknown	Euryarchaeota	Methanococci	Methanococcales	Methanocaldococcaceae	Methanocaldococcus	Methanocaldococcus jannaschii	-	0	0	0	0	0	0	0	0	0	0	0	0	0	0	0	0	1	0	0	0	0	0	0	0	0	0	0	0	0	0	0	0	0	0	0	0	0	0
MG: Uncharacterized protein MJ0500 OS=Methanocaldococcus jannaschii (strain ATCC 43067 / DSM 2661 / JAL-1 / JCM 10045 / NBRC 100440) GN=MJ0500 PE=4 SV=1 [Q57923] Score: 90.9	K09138	-	Archaea	Unknown	Euryarchaeota	Methanococci	Methanococcales	Methanocaldococcaceae	Methanocaldococcus	Methanocaldococcus jannaschii	-	0	0	0	0	0	0	0	0	0	0	0	0	0	0	0	0	1	0	0	0	0	0	0	0	0	0	0	0	0	0	0	0	0	0	0	0	0	0
MG: Uncharacterized transporter MJ0709 OS=Methanocaldococcus jannaschii (strain ATCC 43067 / DSM 2661 / JAL-1 / JCM 10045 / NBRC 100440) GN=MJ0709 PE=3 SV=1 [Q58119] Score: 105.0	-	-	Archaea	Unknown	Euryarchaeota	Methanococci	Methanococcales	Methanocaldococcaceae	Methanocaldococcus	Methanocaldococcus jannaschii	-	0	0	0	0	0	0	0	0	0	0	0	0	0	0	0	0	0	1	0	1	0	0	0	0	0	0	0	0	1	0	0	0	1	0	0	0	0	0
MG: ADP-ribose pyrophosphatase OS=Methanocaldococcus jannaschii (strain ATCC 43067 / DSM 2661 / JAL-1 / JCM 10045 / NBRC 100440) GN=nudF PE=1 SV=1 [Q58549] Score: 68.2	K03574	3.6.1.13	Archaea	Unknown	Euryarchaeota	Methanococci	Methanococcales	Methanocaldococcaceae	Methanocaldococcus	Methanocaldococcus jannaschii	-	0	0	0	0	0	0	0	0	0	0	0	0	0	0	0	0	0	1	0	0	0	0	0	0	0	0	0	0	0	0	0	0	0	0	0	0	0	0
MG: Uncharacterized protein MJ0486 OS=Methanocaldococcus jannaschii (strain ATCC 43067 / DSM 2661 / JAL-1 / JCM 10045 / NBRC 100440) GN=MJ0486 PE=4 SV=1 [Q57910] Score: 85.1	K07139	-	Archaea	Unknown	Euryarchaeota	Methanococci	Methanococcales	Methanocaldococcaceae	Methanocaldococcus	Methanocaldococcus jannaschii	-	0	0	0	0	0	0	0	0	0	0	0	0	0	0	0	0	0	1	0	0	0	0	0	0	0	0	0	0	0	0	0	0	0	0	0	0	0	0
MG: Putative metallophosphoesterase MJ0623 OS=Methanocaldococcus jannaschii (strain ATCC 43067 / DSM 2661 / JAL-1 / JCM 10045 / NBRC 100440) GN=MJ0623 PE=3 SV=1 [Q58040] Score: 71.6	K07095	3.1.4.-	Archaea	Unknown	Euryarchaeota	Methanococci	Methanococcales	Methanocaldococcaceae	Methanocaldococcus	Methanocaldococcus jannaschii	-	0	0	0	0	0	0	0	0	0	0	0	0	0	0	0	0	0	1	0	0	0	0	0	0	0	0	0	0	0	0	0	0	0	0	0	0	0	0
MG: Uncharacterized protein MJ0165 OS=Methanocaldococcus jannaschii (strain ATCC 43067 / DSM 2661 / JAL-1 / JCM 10045 / NBRC 100440) GN=MJ0165 PE=4 SV=1 [Q57629] Score: 146.0	K06898	-	Archaea	Unknown	Euryarchaeota	Methanococci	Methanococcales	Methanocaldococcaceae	Methanocaldococcus	Methanocaldococcus jannaschii	-	0	0	0	0	0	0	0	0	0	0	0	0	0	0	0	0	0	1	0	0	0	0	0	0	0	0	0	0	0	0	0	0	0	0	0	0	0	0
MG: Uncharacterized protein MJ0674 OS=Methanocaldococcus jannaschii (strain ATCC 43067 / DSM 2661 / JAL-1 / JCM 10045 / NBRC 100440) GN=MJ0674 PE=4 SV=1 [Q58087] Score: 142.0	K04070	-	Archaea	Unknown	Euryarchaeota	Methanococci	Methanococcales	Methanocaldococcaceae	Methanocaldococcus	Methanocaldococcus jannaschii	-	0	0	0	0	0	0	0	0	0	0	0	0	0	0	0	0	0	0	1	0	0	0	0	0	0	0	0	0	0	0	0	0	0	0	0	1	0	0
MG: Uncharacterized protein MJ0830 OS=Methanocaldococcus jannaschii (strain ATCC 43067 / DSM 2661 / JAL-1 / JCM 10045 / NBRC 100440) GN=MJ0830 PE=4 SV=1 [Q58240] Score: 122.0	K06864	-	Archaea	Unknown	Euryarchaeota	Methanococci	Methanococcales	Methanocaldococcaceae	Methanocaldococcus	Methanocaldococcus jannaschii	-	0	0	0	0	0	0	0	0	0	0	0	0	0	0	0	0	0	0	0	1	0	0	0	0	0	0	0	0	0	0	0	0	0	0	0	0	0	0
MG: Uncharacterized protein MJ1429 OS=Methanocaldococcus jannaschii (strain ATCC 43067 / DSM 2661 / JAL-1 / JCM 10045 / NBRC 100440) GN=MJ1429 PE=4 SV=1 [Q58824] Score: 148.0	K06915	3.6.4.12	Archaea	Unknown	Euryarchaeota	Methanococci	Methanococcales	Methanocaldococcaceae	Methanocaldococcus	Methanocaldococcus jannaschii	-	0	0	0	0	0	0	0	0	0	0	0	0	0	0	0	0	0	0	0	1	0	0	0	0	0	0	0	0	0	0	0	0	0	0	0	0	0	0
DPOL_METJA DNA polymerase OS=Methanocaldococcus jannaschii (strain ATCC 43067 / DSM 2661 / JAL-1 / JCM 10045 / NBRC 100440) GN=pol PE=3 SV=2	K02319	2.7.7.7	Archaea	Unknown	Euryarchaeota	Methanococci	Methanococcales	Methanocaldococcaceae	Methanocaldococcus	Methanocaldococcus jannaschii	-	0	0	0	0	0	0	0	0	0	0	0	0	0	0	0	0	0	0	0	0	4	5	4	4	0	0	0	0	0	1	2	1	0	0	0	0	0	0
IF2A_METJA Translation initiation factor 2 subunit alpha OS=Methanocaldococcus jannaschii (strain ATCC 43067 / DSM 2661 / JAL-1 / JCM 10045 / NBRC 100440) GN=eif2a PE=3 SV=1	K03237	-	Archaea	Unknown	Euryarchaeota	Methanococci	Methanococcales	Methanocaldococcaceae	Methanocaldococcus	Methanocaldococcus jannaschii	-	0	0	0	0	0	0	0	0	0	0	0	0	0	0	0	0	0	0	0	0	1	4	2	0	0	0	0	0	0	0	0	0	0	0	0	0	0	0
MG: Uncharacterized protein MJ0086 OS=Methanocaldococcus jannaschii (strain ATCC 43067 / DSM 2661 / JAL-1 / JCM 10045 / NBRC 100440) GN=MJ0086 PE=3 SV=1 [Q57551] Score: 103.0	-	2.1.1.-	Archaea	Unknown	Euryarchaeota	Methanococci	Methanococcales	Methanocaldococcaceae	Methanocaldococcus	Methanocaldococcus jannaschii	-	0	0	0	0	0	0	0	0	0	0	0	0	0	0	0	0	0	0	0	0	0	1	0	0	0	0	0	0	0	0	0	0	0	0	0	0	0	0
MG: Uncharacterized protein MJ0435 OS=Methanocaldococcus jannaschii (strain ATCC 43067 / DSM 2661 / JAL-1 / JCM 10045 / NBRC 100440) GN=MJ0435 PE=3 SV=2 [Q57877] Score: 75.1	K07075	-	Archaea	Unknown	Euryarchaeota	Methanococci	Methanococcales	Methanocaldococcaceae	Methanocaldococcus	Methanocaldococcus jannaschii	-	0	0	0	0	0	0	0	0	0	0	0	0	0	0	0	0	0	0	0	0	0	1	0	0	0	0	0	0	0	0	0	0	0	0	0	0	0	0
MG: Uncharacterized N-acetyltransferase MJ1207 OS=Methanocaldococcus jannaschii (strain ATCC 43067 / DSM 2661 / JAL-1 / JCM 10045 / NBRC 100440) GN=MJ1207 PE=3 SV=1 [Q58604] Score: 45.1	-	2.3.1.-	Archaea	Unknown	Euryarchaeota	Methanococci	Methanococcales	Methanocaldococcaceae	Methanocaldococcus	Methanocaldococcus jannaschii	-	0	0	0	0	0	0	0	0	0	0	0	0	0	0	0	0	0	0	0	0	0	1	0	0	0	0	0	0	0	0	0	0	0	0	0	0	0	0
MG: CRISPR-associated helicase Cas3 OS=Methanocaldococcus jannaschii (strain ATCC 43067 / DSM 2661 / JAL-1 / JCM 10045 / NBRC 100440) GN=cas3 PE=3 SV=1 [Q57828] Score: 67.0	K07012	3.6.4.-	Archaea	Unknown	Euryarchaeota	Methanococci	Methanococcales	Methanocaldococcaceae	Methanocaldococcus	Methanocaldococcus jannaschii	-	0	0	0	0	0	0	0	0	0	0	0	0	0	0	0	0	0	0	0	0	0	0	1	0	0	0	0	0	0	0	0	0	0	0	0	0	0	0
MG: Uncharacterized protein MJ0730 OS=Methanocaldococcus jannaschii (strain ATCC 43067 / DSM 2661 / JAL-1 / JCM 10045 / NBRC 100440) GN=MJ0730 PE=4 SV=1 [Q58140] Score: 185.0	-	-	Archaea	Unknown	Euryarchaeota	Methanococci	Methanococcales	Methanocaldococcaceae	Methanocaldococcus	Methanocaldococcus jannaschii	-	0	0	0	0	0	0	0	0	0	0	0	0	0	0	0	0	0	0	0	0	0	0	11	14	0	0	0	0	0	0	0	0	0	0	0	0	0	0
Y703_METJA Uncharacterized protein MJ0703 OS=Methanocaldococcus jannaschii (strain ATCC 43067 / DSM 2661 / JAL-1 / JCM 10045 / NBRC 100440) GN=MJ0703 PE=3 SV=1	K01814	-	Archaea	Unknown	Euryarchaeota	Methanococci	Methanococcales	Methanocaldococcaceae	Methanocaldococcus	Methanocaldococcus jannaschii	-	0	0	0	0	0	0	0	0	0	0	0	0	0	0	0	0	0	0	0	0	0	0	0	1	0	0	0	0	0	0	0	0	0	0	0	0	0	0
MG: Uncharacterized protein MJ1565 OS=Methanocaldococcus jannaschii (strain ATCC 43067 / DSM 2661 / JAL-1 / JCM 10045 / NBRC 100440) GN=MJ1565 PE=4 SV=1 [Q58960] Score: 63.5	K06915	3.6.4.12	Archaea	Unknown	Euryarchaeota	Methanococci	Methanococcales	Methanocaldococcaceae	Methanocaldococcus	Methanocaldococcus jannaschii	-	0	0	0	0	0	0	0	0	0	0	0	0	0	0	0	0	0	0	0	0	0	0	0	1	0	0	0	0	0	0	0	0	0	0	0	0	0	0
MG: Uncharacterized lipoprotein MJ0878 OS=Methanocaldococcus jannaschii (strain ATCC 43067 / DSM 2661 / JAL-1 / JCM 10045 / NBRC 100440) GN=MJ0878 PE=3 SV=1 [Q58288] Score: 87.8	K02016	-	Archaea	Unknown	Euryarchaeota	Methanococci	Methanococcales	Methanocaldococcaceae	Methanocaldococcus	Methanocaldococcus jannaschii	-	0	0	0	0	0	0	0	0	0	0	0	0	0	0	0	0	0	0	0	0	0	0	0	1	0	0	0	0	0	0	0	2	0	0	0	0	0	0
MG: Uncharacterized protein MJ0733 OS=Methanocaldococcus jannaschii (strain ATCC 43067 / DSM 2661 / JAL-1 / JCM 10045 / NBRC 100440) GN=MJ0733 PE=4 SV=1 [Q58143] Score: 45.4	-	-	Archaea	Unknown	Euryarchaeota	Methanococci	Methanococcales	Methanocaldococcaceae	Methanocaldococcus	Methanocaldococcus jannaschii	-	0	0	0	0	0	0	0	0	0	0	0	0	0	0	0	0	0	0	0	0	0	0	0	0	1	1	1	0	0	0	0	0	2	1	0	1	0	0
RL13_METJA 50S ribosomal protein L13 OS=Methanocaldococcus jannaschii (strain ATCC 43067 / DSM 2661 / JAL-1 / JCM 10045 / NBRC 100440) GN=rpl13 PE=3 SV=2	K02871	-	Archaea	Unknown	Euryarchaeota	Methanococci	Methanococcales	Methanocaldococcaceae	Methanocaldococcus	Methanocaldococcus jannaschii	-	0	0	0	0	0	0	0	0	0	0	0	0	0	0	0	0	0	0	0	0	0	0	0	0	1	0	0	0	0	0	0	0	0	0	0	0	0	0
MG: Uncharacterized protein MJ1055 OS=Methanocaldococcus jannaschii (strain ATCC 43067 / DSM 2661 / JAL-1 / JCM 10045 / NBRC 100440) GN=MJ1055 PE=3 SV=1 [Q58455] Score: 305.0	K08679	-	Archaea	Unknown	Euryarchaeota	Methanococci	Methanococcales	Methanocaldococcaceae	Methanocaldococcus	Methanocaldococcus jannaschii	-	0	0	0	0	0	0	0	0	0	0	0	0	0	0	0	0	0	0	0	0	0	0	0	0	0	1	0	0	0	0	0	0	0	0	0	0	1	0
MG: Amidophosphoribosyltransferase OS=Methanocaldococcus jannaschii (strain ATCC 43067 / DSM 2661 / JAL-1 / JCM 10045 / NBRC 100440) GN=purF PE=3 SV=3 [Q57657] Score: 465.0	K00764	2.4.2.14	Archaea	Unknown	Euryarchaeota	Methanococci	Methanococcales	Methanocaldococcaceae	Methanocaldococcus	Methanocaldococcus jannaschii	-	0	0	0	0	0	0	0	0	0	0	0	0	0	0	0	0	0	0	0	0	0	0	0	0	0	0	1	0	0	0	0	0	0	0	0	0	0	1
MG: Putative ATP-dependent RNA helicase MJ1505 OS=Methanocaldococcus jannaschii (strain ATCC 43067 / DSM 2661 / JAL-1 / JCM 10045 / NBRC 100440) GN=MJ1505 PE=3 SV=2 [Q58900] Score: 135.0	K10896	3.6.4.13	Archaea	Unknown	Euryarchaeota	Methanococci	Methanococcales	Methanocaldococcaceae	Methanocaldococcus	Methanocaldococcus jannaschii	-	0	0	0	0	0	0	0	0	0	0	0	0	0	0	0	0	0	0	0	0	0	0	0	0	0	0	1	0	0	0	0	0	0	0	0	0	0	0
MG: Uncharacterized protein MJ1650 OS=Methanocaldococcus jannaschii (strain ATCC 43067 / DSM 2661 / JAL-1 / JCM 10045 / NBRC 100440) GN=MJ1650 PE=4 SV=1 [Q59044] Score: 149.0	K07562	-	Archaea	Unknown	Euryarchaeota	Methanococci	Methanococcales	Methanocaldococcaceae	Methanocaldococcus	Methanocaldococcus jannaschii	-	0	0	0	0	0	0	0	0	0	0	0	0	0	0	0	0	0	0	0	0	0	0	0	0	0	0	1	0	0	0	0	0	0	0	0	0	0	0
MG: L-fuculose phosphate aldolase OS=Methanocaldococcus jannaschii (strain ATCC 43067 / DSM 2661 / JAL-1 / JCM 10045 / NBRC 100440) GN=fucA PE=1 SV=1 [Q58813] Score: 84.3	K01628	4.1.2.17	Archaea	Unknown	Euryarchaeota	Methanococci	Methanococcales	Methanocaldococcaceae	Methanocaldococcus	Methanocaldococcus jannaschii	-	0	0	0	0	0	0	0	0	0	0	0	0	0	0	0	0	0	0	0	0	0	0	0	0	0	0	1	0	0	0	0	0	0	0	0	0	0	0
MG: Uncharacterized protein MJ0910 OS=Methanocaldococcus jannaschii (strain ATCC 43067 / DSM 2661 / JAL-1 / JCM 10045 / NBRC 100440) GN=MJ0910 PE=4 SV=1 [Q58320] Score: 94.4	K03404	-	Archaea	Unknown	Euryarchaeota	Methanococci	Methanococcales	Methanocaldococcaceae	Methanocaldococcus	Methanocaldococcus jannaschii	-	0	0	0	0	0	0	0	0	0	0	0	0	0	0	0	0	0	0	0	0	0	0	0	0	0	0	1	0	0	0	0	0	0	0	0	0	0	0
MG: V-type ATP synthase subunit E OS=Methanocaldococcus jannaschii (strain ATCC 43067 / DSM 2661 / JAL-1 / JCM 10045 / NBRC 100440) GN=atpE PE=1 SV=1 [Q57673] Score: 55.5	K02121	-	Archaea	Unknown	Euryarchaeota	Methanococci	Methanococcales	Methanocaldococcaceae	Methanocaldococcus	Methanocaldococcus jannaschii	-	0	0	0	0	0	0	0	0	0	0	0	0	0	0	0	0	0	0	0	0	0	0	0	0	0	0	1	0	0	0	0	0	0	0	0	0	0	0
MG: Uncharacterized glycosyltransferase MJ1069 OS=Methanocaldococcus jannaschii (strain ATCC 43067 / DSM 2661 / JAL-1 / JCM 10045 / NBRC 100440) GN=MJ1069 PE=3 SV=1 [Q58469] Score: 62.4	-	2.4.-.-	Archaea	Unknown	Euryarchaeota	Methanococci	Methanococcales	Methanocaldococcaceae	Methanocaldococcus	Methanocaldococcus jannaschii	-	0	0	0	0	0	0	0	0	0	0	0	0	0	0	0	0	0	0	0	0	0	0	0	0	0	0	0	1	0	0	0	0	0	0	0	0	0	0
MG: Phosphoribosylformylglycinamidine synthase subunit PurL OS=Methanocaldococcus jannaschii (strain ATCC 43067 / DSM 2661 / JAL-1 / JCM 10045 / NBRC 100440) GN=purL PE=3 SV=1 [Q58660] Score: 162.0	K01952	6.3.5.3	Archaea	Unknown	Euryarchaeota	Methanococci	Methanococcales	Methanocaldococcaceae	Methanocaldococcus	Methanocaldococcus jannaschii	-	0	0	0	0	0	0	0	0	0	0	0	0	0	0	0	0	0	0	0	0	0	0	0	0	0	0	0	0	1	0	0	0	0	0	0	0	0	0
MG: Modification methylase MjaV OS=Methanocaldococcus jannaschii (strain ATCC 43067 / DSM 2661 / JAL-1 / JCM 10045 / NBRC 100440) GN=mjaVM PE=1 SV=1 [Q58893] Score: 70.1	-	2.1.1.113	Archaea	Unknown	Euryarchaeota	Methanococci	Methanococcales	Methanocaldococcaceae	Methanocaldococcus	Methanocaldococcus jannaschii	-	0	0	0	0	0	0	0	0	0	0	0	0	0	0	0	0	0	0	0	0	0	0	0	0	0	0	0	0	1	0	0	0	0	0	1	0	0	0
MG: Uncharacterized protein MJ0964 OS=Methanocaldococcus jannaschii (strain ATCC 43067 / DSM 2661 / JAL-1 / JCM 10045 / NBRC 100440) GN=MJ0964 PE=3 SV=1 [Q58374] Score: 456.0	K01473	-	Archaea	Unknown	Euryarchaeota	Methanococci	Methanococcales	Methanocaldococcaceae	Methanocaldococcus	Methanocaldococcus jannaschii	-	0	0	0	0	0	0	0	0	0	0	0	0	0	0	0	0	0	0	0	0	0	0	0	0	0	0	0	0	1	0	0	0	0	0	0	0	0	0
MG: Uncharacterized protein MJ1450 OS=Methanocaldococcus jannaschii (strain ATCC 43067 / DSM 2661 / JAL-1 / JCM 10045 / NBRC 100440) GN=MJ1450 PE=3 SV=1 [Q58845] Score: 202.0	-	-	Archaea	Unknown	Euryarchaeota	Methanococci	Methanococcales	Methanocaldococcaceae	Methanocaldococcus	Methanocaldococcus jannaschii	-	0	0	0	0	0	0	0	0	0	0	0	0	0	0	0	0	0	0	0	0	0	0	0	0	0	0	0	0	1	0	0	0	0	0	0	0	0	0
MG: Uncharacterized protein MJECL43 OS=Methanocaldococcus jannaschii (strain ATCC 43067 / DSM 2661 / JAL-1 / JCM 10045 / NBRC 100440) GN=MJECL43 PE=4 SV=1 [Q60298] Score: 52.0	-	-	Archaea	Unknown	Euryarchaeota	Methanococci	Methanococcales	Methanocaldococcaceae	Methanocaldococcus	Methanocaldococcus jannaschii	-	0	0	0	0	0	0	0	0	0	0	0	0	0	0	0	0	0	0	0	0	0	0	0	0	0	0	0	0	1	0	0	0	0	0	0	0	0	0
RPOD_METJA DNA-directed RNA polymerase subunit D OS=Methanocaldococcus jannaschii (strain ATCC 43067 / DSM 2661 / JAL-1 / JCM 10045 / NBRC 100440) GN=rpoD PE=1 SV=1	K03047	2.7.7.6	Archaea	Unknown	Euryarchaeota	Methanococci	Methanococcales	Methanocaldococcaceae	Methanocaldococcus	Methanocaldococcus jannaschii	-	0	0	0	0	0	0	0	0	0	0	0	0	0	0	0	0	0	0	0	0	0	0	0	0	0	0	0	0	0	1	0	0	0	0	0	0	0	0
MG: Uncharacterized protein MJ1154 OS=Methanocaldococcus jannaschii (strain ATCC 43067 / DSM 2661 / JAL-1 / JCM 10045 / NBRC 100440) GN=MJ1154 PE=4 SV=1 [Q58554] Score: 209.0	K06885	-	Archaea	Unknown	Euryarchaeota	Methanococci	Methanococcales	Methanocaldococcaceae	Methanocaldococcus	Methanocaldococcus jannaschii	-	0	0	0	0	0	0	0	0	0	0	0	0	0	0	0	0	0	0	0	0	0	0	0	0	0	0	0	0	0	1	0	0	1	0	0	0	0	0
MG: Putative ABC transporter permease protein MJ0413 OS=Methanocaldococcus jannaschii (strain ATCC 43067 / DSM 2661 / JAL-1 / JCM 10045 / NBRC 100440) GN=MJ0413 PE=3 SV=1 [Q57856] Score: 82.0	K02050	-	Archaea	Unknown	Euryarchaeota	Methanococci	Methanococcales	Methanocaldococcaceae	Methanocaldococcus	Methanocaldococcus jannaschii	-	0	0	0	0	0	0	0	0	0	0	0	0	0	0	0	0	0	0	0	0	0	0	0	0	0	0	0	0	0	1	0	0	0	0	0	0	0	0
MG: Coenzyme A biosynthesis bifunctional protein CoaBC OS=Methanocaldococcus jannaschii (strain ATCC 43067 / DSM 2661 / JAL-1 / JCM 10045 / NBRC 100440) GN=coaBC PE=3 SV=1 [Q58323] Score: 204.0	K13038	4.1.1.36|6.3.2.5	Archaea	Unknown	Euryarchaeota	Methanococci	Methanococcales	Methanocaldococcaceae	Methanocaldococcus	Methanocaldococcus jannaschii	-	0	0	0	0	0	0	0	0	0	0	0	0	0	0	0	0	0	0	0	0	0	0	0	0	0	0	0	0	0	0	1	0	0	0	0	0	0	0
MG: Small-conductance mechanosensitive channel MscMJ OS=Methanocaldococcus jannaschii (strain ATCC 43067 / DSM 2661 / JAL-1 / JCM 10045 / NBRC 100440) GN=MJ0170 PE=1 SV=1 [Q57634] Score: 120.0	K16052	-	Archaea	Unknown	Euryarchaeota	Methanococci	Methanococcales	Methanocaldococcaceae	Methanocaldococcus	Methanocaldococcus jannaschii	-	0	0	0	0	0	0	0	0	0	0	0	0	0	0	0	0	0	0	0	0	0	0	0	0	0	0	0	0	0	0	0	1	0	0	0	0	0	0
MG: Uncharacterized protein MJ1136 OS=Methanocaldococcus jannaschii (strain ATCC 43067 / DSM 2661 / JAL-1 / JCM 10045 / NBRC 100440) GN=MJ1136 PE=3 SV=1 [Q58536] Score: 360.0	K07739	-	Archaea	Unknown	Euryarchaeota	Methanococci	Methanococcales	Methanocaldococcaceae	Methanocaldococcus	Methanocaldococcus jannaschii	-	0	0	0	0	0	0	0	0	0	0	0	0	0	0	0	0	0	0	0	0	0	0	0	0	0	0	0	0	0	0	0	1	0	0	0	0	0	0
MG: Putative flagella-related protein H OS=Methanocaldococcus jannaschii (strain ATCC 43067 / DSM 2661 / JAL-1 / JCM 10045 / NBRC 100440) GN=flaH PE=4 SV=1 [Q58309] Score: 166.0	K07331	-	Archaea	Unknown	Euryarchaeota	Methanococci	Methanococcales	Methanocaldococcaceae	Methanocaldococcus	Methanocaldococcus jannaschii	-	0	0	0	0	0	0	0	0	0	0	0	0	0	0	0	0	0	0	0	0	0	0	0	0	0	0	0	0	0	0	0	0	1	0	0	0	0	0
MG: Uncharacterized protein MJ0811 OS=Methanocaldococcus jannaschii (strain ATCC 43067 / DSM 2661 / JAL-1 / JCM 10045 / NBRC 100440) GN=MJ0811 PE=3 SV=1 [Q58221] Score: 134.0	-	-	Archaea	Unknown	Euryarchaeota	Methanococci	Methanococcales	Methanocaldococcaceae	Methanocaldococcus	Methanocaldococcus jannaschii	-	0	0	0	0	0	0	0	0	0	0	0	0	0	0	0	0	0	0	0	0	0	0	0	0	0	0	0	0	0	0	0	0	1	0	0	0	0	0
MG: Uncharacterized protein MJ1520 OS=Methanocaldococcus jannaschii (strain ATCC 43067 / DSM 2661 / JAL-1 / JCM 10045 / NBRC 100440) GN=MJ1520 PE=3 SV=1 [Q58915] Score: 128.0	-	-	Archaea	Unknown	Euryarchaeota	Methanococci	Methanococcales	Methanocaldococcaceae	Methanocaldococcus	Methanocaldococcus jannaschii	-	0	0	0	0	0	0	0	0	0	0	0	0	0	0	0	0	0	0	0	0	0	0	0	0	0	0	0	0	0	0	0	0	1	0	0	0	0	0
MG: Dihydroorotate dehydrogenase B (NAD(+)), catalytic subunit OS=Methanocaldococcus jannaschii (strain ATCC 43067 / DSM 2661 / JAL-1 / JCM 10045 / NBRC 100440) GN=pyrD PE=3 SV=1 [Q58070] Score: 94.7	K17828	1.3.1.14	Archaea	Unknown	Euryarchaeota	Methanococci	Methanococcales	Methanocaldococcaceae	Methanocaldococcus	Methanocaldococcus jannaschii	-	0	0	0	0	0	0	0	0	0	0	0	0	0	0	0	0	0	0	0	0	0	0	0	0	0	0	0	0	0	0	0	0	0	1	0	0	0	0
MG: Uncharacterized protein MJ0003 OS=Methanocaldococcus jannaschii (strain ATCC 43067 / DSM 2661 / JAL-1 / JCM 10045 / NBRC 100440) GN=MJ0003 PE=4 SV=1 [Q60313] Score: 64.7	-	-	Archaea	Unknown	Euryarchaeota	Methanococci	Methanococcales	Methanocaldococcaceae	Methanocaldococcus	Methanocaldococcus jannaschii	-	0	0	0	0	0	0	0	0	0	0	0	0	0	0	0	0	0	0	0	0	0	0	0	0	0	0	0	0	0	0	0	0	0	0	3	0	0	0
MG: Uncharacterized protein MJECL04 OS=Methanocaldococcus jannaschii (strain ATCC 43067 / DSM 2661 / JAL-1 / JCM 10045 / NBRC 100440) GN=MJECL04 PE=4 SV=1 [Q60260] Score: 71.6	K06921	-	Archaea	Unknown	Euryarchaeota	Methanococci	Methanococcales	Methanocaldococcaceae	Methanocaldococcus	Methanocaldococcus jannaschii	-	0	0	0	0	0	0	0	0	0	0	0	0	0	0	0	0	0	0	0	0	0	0	0	0	0	0	0	0	0	0	0	0	0	0	1	0	0	0
MG: Homoserine dehydrogenase OS=Methanocaldococcus jannaschii (strain ATCC 43067 / DSM 2661 / JAL-1 / JCM 10045 / NBRC 100440) GN=hom PE=3 SV=1 [Q58997] Score: 230.0	K00003	1.1.1.3	Archaea	Unknown	Euryarchaeota	Methanococci	Methanococcales	Methanocaldococcaceae	Methanocaldococcus	Methanocaldococcus jannaschii	-	0	0	0	0	0	0	0	0	0	0	0	0	0	0	0	0	0	0	0	0	0	0	0	0	0	0	0	0	0	0	0	0	0	0	2	4	0	0
Y1155_METJA UPF0313 protein MJ1155 OS=Methanocaldococcus jannaschii (strain ATCC 43067 / DSM 2661 / JAL-1 / JCM 10045 / NBRC 100440) GN=MJ1155 PE=3 SV=1	-	-	Archaea	Unknown	Euryarchaeota	Methanococci	Methanococcales	Methanocaldococcaceae	Methanocaldococcus	Methanocaldococcus jannaschii	-	0	0	0	0	0	0	0	0	0	0	0	0	0	0	0	0	0	0	0	0	0	0	0	0	0	0	0	0	0	0	0	0	0	0	0	0	1	0
MG: Uncharacterized protein MJ0021 OS=Methanocaldococcus jannaschii (strain ATCC 43067 / DSM 2661 / JAL-1 / JCM 10045 / NBRC 100440) GN=MJ0021 PE=3 SV=1 [Q60332] Score: 215.0	K07129	1.97.1.-	Archaea	Unknown	Euryarchaeota	Methanococci	Methanococcales	Methanocaldococcaceae	Methanocaldococcus	Methanocaldococcus jannaschii	-	0	0	0	0	0	0	0	0	0	0	0	0	0	0	0	0	0	0	0	0	0	0	0	0	0	0	0	0	0	0	0	0	0	0	0	0	0	1
MG: S-layer protein OS=Methanocaldococcus jannaschii (strain ATCC 43067 / DSM 2661 / JAL-1 / JCM 10045 / NBRC 100440) GN=sla PE=1 SV=1 [Q58232] Score: 65.1	-	-	Archaea	Unknown	Euryarchaeota	Methanococci	Methanococcales	Methanocaldococcaceae	Methanocaldococcus	Methanocaldococcus jannaschii	-	0	0	0	0	0	0	0	0	0	0	0	0	0	0	0	0	0	0	0	0	0	0	0	0	0	0	0	0	0	0	0	0	0	0	0	0	0	0
MG: Uncharacterized protein MJ1614 OS=Methanocaldococcus jannaschii (strain ATCC 43067 / DSM 2661 / JAL-1 / JCM 10045 / NBRC 100440) GN=MJ1614 PE=4 SV=2 [Q59009] Score: 124.0	-	-	Archaea	Unknown	Euryarchaeota	Methanococci	Methanococcales	Methanocaldococcaceae	Methanocaldococcus	Methanocaldococcus jannaschii	-	0	0	0	0	0	0	0	0	0	0	0	0	0	0	0	0	0	0	0	0	0	0	0	0	0	0	0	0	0	0	0	0	0	0	0	0	0	0
MG: Uncharacterized protein MJ1337 OS=Methanocaldococcus jannaschii (strain ATCC 43067 / DSM 2661 / JAL-1 / JCM 10045 / NBRC 100440) GN=MJ1337 PE=4 SV=1 [Q58733] Score: 186.0	-	-	Archaea	Unknown	Euryarchaeota	Methanococci	Methanococcales	Methanocaldococcaceae	Methanocaldococcus	Methanocaldococcus jannaschii	-	0	0	0	0	0	0	0	0	0	0	0	0	0	0	0	0	0	0	0	0	0	0	0	0	0	0	0	0	0	0	0	0	0	0	0	0	0	0
MG: Uncharacterized protein MJ0188 OS=Methanocaldococcus jannaschii (strain ATCC 43067 / DSM 2661 / JAL-1 / JCM 10045 / NBRC 100440) GN=MJ0188 PE=3 SV=1 [Q57647] Score: 230.0	K00088	-	Archaea	Unknown	Euryarchaeota	Methanococci	Methanococcales	Methanocaldococcaceae	Methanocaldococcus	Methanocaldococcus jannaschii	-	0	0	0	0	0	0	0	0	0	0	0	0	0	0	0	0	0	0	0	0	0	0	0	0	0	0	0	0	0	0	0	0	0	0	0	0	0	0
MG: Archaeosine synthase OS=Methanocaldococcus jannaschii (strain ATCC 43067 / DSM 2661 / JAL-1 / JCM 10045 / NBRC 100440) GN=arcS PE=1 SV=1 [Q58428] Score: 144.0	K07557	2.6.1.97	Archaea	Unknown	Euryarchaeota	Methanococci	Methanococcales	Methanocaldococcaceae	Methanocaldococcus	Methanocaldococcus jannaschii	-	0	0	0	0	0	0	0	0	0	0	0	0	0	0	0	0	0	0	0	0	0	0	0	0	0	0	0	0	0	0	0	0	0	0	0	0	0	0
MG: Uncharacterized protein MJ0582 OS=Methanocaldococcus jannaschii (strain ATCC 43067 / DSM 2661 / JAL-1 / JCM 10045 / NBRC 100440) GN=MJ0582 PE=4 SV=1 [Q58002] Score: 58.2	-	-	Archaea	Unknown	Euryarchaeota	Methanococci	Methanococcales	Methanocaldococcaceae	Methanocaldococcus	Methanocaldococcus jannaschii	-	0	0	0	0	0	0	0	0	0	0	0	0	0	0	0	0	0	0	0	0	0	0	0	0	0	0	0	0	0	0	0	0	0	0	0	0	0	0
MG: Uncharacterized methyltransferase MJ1487 OS=Methanocaldococcus jannaschii (strain ATCC 43067 / DSM 2661 / JAL-1 / JCM 10045 / NBRC 100440) GN=MJ1487 PE=3 SV=1 [Q58882] Score: 100.0	-	2.1.1.-	Archaea	Unknown	Euryarchaeota	Methanococci	Methanococcales	Methanocaldococcaceae	Methanocaldococcus	Methanocaldococcus jannaschii	-	0	0	0	0	0	0	0	0	0	0	0	0	0	0	0	0	0	0	0	0	0	0	0	0	0	0	0	0	0	0	0	0	0	0	0	0	0	0
MG: Uncharacterized protein MJ0832 OS=Methanocaldococcus jannaschii (strain ATCC 43067 / DSM 2661 / JAL-1 / JCM 10045 / NBRC 100440) GN=MJ0832 PE=3 SV=1 [Q58242] Score: 116.0	K00527	-	Archaea	Unknown	Euryarchaeota	Methanococci	Methanococcales	Methanocaldococcaceae	Methanocaldococcus	Methanocaldococcus jannaschii	-	0	0	0	0	0	0	0	0	0	0	0	0	0	0	0	0	0	0	0	0	0	0	0	0	0	0	0	0	0	0	0	0	0	0	0	0	0	0
MG: Uncharacterized protein MJ0781 OS=Methanocaldococcus jannaschii (strain ATCC 43067 / DSM 2661 / JAL-1 / JCM 10045 / NBRC 100440) GN=MJ0781 PE=1 SV=1 [Q58191] Score: 179.0	K07332	-	Archaea	Unknown	Euryarchaeota	Methanococci	Methanococcales	Methanocaldococcaceae	Methanocaldococcus	Methanocaldococcus jannaschii	-	0	0	0	0	0	0	0	0	0	0	0	0	0	0	0	0	0	0	0	0	0	0	0	0	0	0	0	0	0	0	0	0	0	0	0	0	0	0
MG: Uncharacterized ATP-binding protein MJ0084 OS=Methanocaldococcus jannaschii (strain ATCC 43067 / DSM 2661 / JAL-1 / JCM 10045 / NBRC 100440) GN=MJ0084 PE=4 SV=1 [Q60392] Score: 250.0	K07321	-	Archaea	Unknown	Euryarchaeota	Methanococci	Methanococcales	Methanocaldococcaceae	Methanocaldococcus	Methanocaldococcus jannaschii	-	0	0	0	0	0	0	0	0	0	0	0	0	0	0	0	0	0	0	0	0	0	0	0	0	0	0	0	0	0	0	0	0	0	0	0	0	0	0
MG: Uncharacterized HTH-type transcriptional regulator MJ1398 OS=Methanocaldococcus jannaschii (strain ATCC 43067 / DSM 2661 / JAL-1 / JCM 10045 / NBRC 100440) GN=MJ1398 PE=3 SV=1 [Q58793] Score: 67.8	-	-	Archaea	Unknown	Euryarchaeota	Methanococci	Methanococcales	Methanocaldococcaceae	Methanocaldococcus	Methanocaldococcus jannaschii	-	0	0	0	0	0	0	0	0	0	0	0	0	0	0	0	0	0	0	0	0	0	0	0	0	0	0	0	0	0	0	0	0	0	0	0	0	0	0
MG: Uncharacterized protein MJ0498 OS=Methanocaldococcus jannaschii (strain ATCC 43067 / DSM 2661 / JAL-1 / JCM 10045 / NBRC 100440) GN=MJ0498 PE=4 SV=1 [Q57921] Score: 82.4	-	-	Archaea	Unknown	Euryarchaeota	Methanococci	Methanococcales	Methanocaldococcaceae	Methanocaldococcus	Methanocaldococcus jannaschii	-	0	0	0	0	0	0	0	0	0	0	0	0	0	0	0	0	0	0	0	0	0	0	0	0	0	0	0	0	0	0	0	0	0	0	0	0	0	0
MG: tRNA (guanine(6)-N2)-methyltransferase OS=Methanocaldococcus jannaschii (strain ATCC 43067 / DSM 2661 / JAL-1 / JCM 10045 / NBRC 100440) GN=trm14 PE=1 SV=1 [Q57880] Score: 95.1	K16318	2.1.1.256	Archaea	Unknown	Euryarchaeota	Methanococci	Methanococcales	Methanocaldococcaceae	Methanocaldococcus	Methanocaldococcus jannaschii	-	0	0	0	0	0	0	0	0	0	0	0	0	0	0	0	0	0	0	0	0	0	0	0	0	0	0	0	0	0	0	0	0	0	0	0	0	0	0
MG: Uncharacterized protein MJ1361 OS=Methanocaldococcus jannaschii (strain ATCC 43067 / DSM 2661 / JAL-1 / JCM 10045 / NBRC 100440) GN=MJ1361 PE=4 SV=1 [Q58756] Score: 47.8	-	-	Archaea	Unknown	Euryarchaeota	Methanococci	Methanococcales	Methanocaldococcaceae	Methanocaldococcus	Methanocaldococcus jannaschii	-	0	0	0	0	0	0	0	0	0	0	0	0	0	0	0	0	0	0	0	0	0	0	0	0	0	0	0	0	0	0	0	0	0	0	0	0	0	0
MG: Uncharacterized protein MJ0357 OS=Methanocaldococcus jannaschii (strain ATCC 43067 / DSM 2661 / JAL-1 / JCM 10045 / NBRC 100440) GN=MJ0357 PE=4 SV=1 [Q57803] Score: 63.5	-	-	Archaea	Unknown	Euryarchaeota	Methanococci	Methanococcales	Methanocaldococcaceae	Methanocaldococcus	Methanocaldococcus jannaschii	-	0	0	0	0	0	0	0	0	0	0	0	0	0	0	0	0	0	0	0	0	0	0	0	0	0	0	0	0	0	0	0	0	0	0	0	0	0	0
MG: Uncharacterized protein MJ1351.1 OS=Methanocaldococcus jannaschii (strain ATCC 43067 / DSM 2661 / JAL-1 / JCM 10045 / NBRC 100440) GN=MJ1351.1 PE=3 SV=2 [P58018] Score: 400.0	-	-	Archaea	Unknown	Euryarchaeota	Methanococci	Methanococcales	Methanocaldococcaceae	Methanocaldococcus	Methanocaldococcus jannaschii	-	0	0	0	0	0	0	0	0	0	0	0	0	0	0	0	0	0	0	0	0	0	0	0	0	0	0	0	0	0	0	0	0	0	0	0	0	0	0
MG: UPF0332 protein MJ0605 OS=Methanocaldococcus jannaschii (strain ATCC 43067 / DSM 2661 / JAL-1 / JCM 10045 / NBRC 100440) GN=MJ0605 PE=3 SV=1 [Q58022] Score: 43.1	K09132	-	Archaea	Unknown	Euryarchaeota	Methanococci	Methanococcales	Methanocaldococcaceae	Methanocaldococcus	Methanocaldococcus jannaschii	-	0	0	0	0	0	0	0	0	0	0	0	0	0	0	0	0	0	0	0	0	0	0	0	0	0	0	0	0	0	0	0	0	0	0	0	0	0	0
MG: Uncharacterized protein MJ0440 OS=Methanocaldococcus jannaschii (strain ATCC 43067 / DSM 2661 / JAL-1 / JCM 10045 / NBRC 100440) GN=MJ0440 PE=4 SV=1 [Q57882] Score: 98.2	-	-	Archaea	Unknown	Euryarchaeota	Methanococci	Methanococcales	Methanocaldococcaceae	Methanocaldococcus	Methanocaldococcus jannaschii	-	0	0	0	0	0	0	0	0	0	0	0	0	0	0	0	0	0	0	0	0	0	0	0	0	0	0	0	0	0	0	0	0	0	0	0	0	0	0
MG: UPF0056 membrane protein MJ1677 OS=Methanocaldococcus jannaschii (strain ATCC 43067 / DSM 2661 / JAL-1 / JCM 10045 / NBRC 100440) GN=MJ1677 PE=3 SV=1 [Q59071] Score: 86.3	K05595	-	Archaea	Unknown	Euryarchaeota	Methanococci	Methanococcales	Methanocaldococcaceae	Methanocaldococcus	Methanocaldococcus jannaschii	-	0	0	0	0	0	0	0	0	0	0	0	0	0	0	0	0	0	0	0	0	0	0	0	0	0	0	0	0	0	0	0	0	0	0	0	0	0	0
MG: Uncharacterized protein MJ0779 OS=Methanocaldococcus jannaschii (strain ATCC 43067 / DSM 2661 / JAL-1 / JCM 10045 / NBRC 100440) GN=MJ0779 PE=4 SV=1 [Q58189] Score: 50.4	K07333	-	Archaea	Unknown	Euryarchaeota	Methanococci	Methanococcales	Methanocaldococcaceae	Methanocaldococcus	Methanocaldococcus jannaschii	-	0	0	0	0	0	0	0	0	0	0	0	0	0	0	0	0	0	0	0	0	0	0	0	0	0	0	0	0	0	0	0	0	0	0	0	0	0	0
MG: DNA double-strand break repair Rad50 ATPase OS=Methanocaldococcus jannaschii (strain ATCC 43067 / DSM 2661 / JAL-1 / JCM 10045 / NBRC 100440) GN=rad50 PE=1 SV=1 [Q58718] Score: 52.4	K03546	-	Archaea	Unknown	Euryarchaeota	Methanococci	Methanococcales	Methanocaldococcaceae	Methanocaldococcus	Methanocaldococcus jannaschii	-	0	0	0	0	0	0	0	0	0	0	0	0	0	0	0	0	0	0	0	0	0	0	0	0	0	0	0	0	0	0	0	0	0	0	0	0	0	0
MG: Uncharacterized protein MJECL35 OS=Methanocaldococcus jannaschii (strain ATCC 43067 / DSM 2661 / JAL-1 / JCM 10045 / NBRC 100440) GN=MJECL35 PE=3 SV=1 [Q60291] Score: 51.6	-	-	Archaea	Unknown	Euryarchaeota	Methanococci	Methanococcales	Methanocaldococcaceae	Methanocaldococcus	Methanocaldococcus jannaschii	-	0	0	0	0	0	0	0	0	0	0	0	0	0	0	0	0	0	0	0	0	0	0	0	0	0	0	0	0	0	0	0	0	0	0	0	0	0	0
MG: Probable L-aspartate dehydrogenase OS=Methanocaldococcus jannaschii (strain ATCC 43067 / DSM 2661 / JAL-1 / JCM 10045 / NBRC 100440) GN=nadX PE=3 SV=1 [Q58325] Score: 51.2	K06989	1.4.1.21	Archaea	Unknown	Euryarchaeota	Methanococci	Methanococcales	Methanocaldococcaceae	Methanocaldococcus	Methanocaldococcus jannaschii	-	0	0	0	0	0	0	0	0	0	0	0	0	0	0	0	0	0	0	0	0	0	0	0	0	0	0	0	0	0	0	0	0	0	0	0	0	0	0
MG: Uncharacterized protein MJ0778 OS=Methanocaldococcus jannaschii (strain ATCC 43067 / DSM 2661 / JAL-1 / JCM 10045 / NBRC 100440) GN=MJ0778 PE=4 SV=1 [Q58188] Score: 50.1	K06950	-	Archaea	Unknown	Euryarchaeota	Methanococci	Methanococcales	Methanocaldococcaceae	Methanocaldococcus	Methanocaldococcus jannaschii	-	0	0	0	0	0	0	0	0	0	0	0	0	0	0	0	0	0	0	0	0	0	0	0	0	0	0	0	0	0	0	0	0	0	0	0	0	0	0
Y3523_METJA Uncharacterized protein MJECL23 OS=Methanocaldococcus jannaschii (strain ATCC 43067 / DSM 2661 / JAL-1 / JCM 10045 / NBRC 100440) GN=MJECL23 PE=4 SV=1	-	-	Archaea	Unknown	Euryarchaeota	Methanococci	Methanococcales	Methanocaldococcaceae	Methanocaldococcus	Methanocaldococcus jannaschii	-	0	0	0	0	0	0	0	0	0	0	0	0	0	0	0	0	0	0	0	0	0	0	0	0	0	0	0	0	0	0	0	0	0	0	0	0	0	0
MG: Uncharacterized protein MJ0094 OS=Methanocaldococcus jannaschii (strain ATCC 43067 / DSM 2661 / JAL-1 / JCM 10045 / NBRC 100440) GN=MJ0094 PE=4 SV=1 [Q57559] Score: 329.0	-	-	Archaea	Unknown	Euryarchaeota	Methanococci	Methanococcales	Methanocaldococcaceae	Methanocaldococcus	Methanocaldococcus jannaschii	-	0	0	0	0	0	0	0	0	0	0	0	0	0	0	0	0	0	0	0	0	0	0	0	0	0	0	0	0	0	0	0	0	0	0	0	0	0	0
MG: Uncharacterized protein MJ1295 OS=Methanocaldococcus jannaschii (strain ATCC 43067 / DSM 2661 / JAL-1 / JCM 10045 / NBRC 100440) GN=MJ1295 PE=4 SV=1 [Q58691] Score: 220.0	-	-	Archaea	Unknown	Euryarchaeota	Methanococci	Methanococcales	Methanocaldococcaceae	Methanocaldococcus	Methanocaldococcus jannaschii	-	0	0	0	0	0	0	0	0	0	0	0	0	0	0	0	0	0	0	0	0	0	0	0	0	0	0	0	0	0	0	0	0	0	0	0	0	0	0
MG: Uncharacterized ferredoxin MJ0099 OS=Methanocaldococcus jannaschii (strain ATCC 43067 / DSM 2661 / JAL-1 / JCM 10045 / NBRC 100440) GN=MJ0099 PE=3 SV=1 [Q57563] Score: 85.9	-	-	Archaea	Unknown	Euryarchaeota	Methanococci	Methanococcales	Methanocaldococcaceae	Methanocaldococcus	Methanocaldococcus jannaschii	-	0	0	0	0	0	0	0	0	0	0	0	0	0	0	0	0	0	0	0	0	0	0	0	0	0	0	0	0	0	0	0	0	0	0	0	0	0	0
MG: Uncharacterized protein MJ1004 OS=Methanocaldococcus jannaschii (strain ATCC 43067 / DSM 2661 / JAL-1 / JCM 10045 / NBRC 100440) GN=MJ1004 PE=3 SV=1 [Q58410] Score: 204.0	-	-	Archaea	Unknown	Euryarchaeota	Methanococci	Methanococcales	Methanocaldococcaceae	Methanocaldococcus	Methanocaldococcus jannaschii	-	0	0	0	0	0	0	0	0	0	0	0	0	0	0	0	0	0	0	0	0	0	0	0	0	0	0	0	0	0	0	0	0	0	0	0	0	0	0
GLMM_META3 Phosphoglucosamine mutase OS=Methanococcus aeolicus (strain Nankai-3 / ATCC BAA-1280) GN=glmM PE=3 SV=1	K03431	5.4.2.10	Archaea	Unknown	Euryarchaeota	Methanococci	Methanococcales	Methanococcaceae	Methanococcus	Methanococcus aeolicus	-	0	0	0	0	0	0	0	0	0	0	0	0	2	0	0	0	0	0	0	0	0	0	0	0	0	0	0	0	0	0	0	0	0	0	0	0	0	0
RS2_META3 30S ribosomal protein S2 OS=Methanococcus aeolicus (strain Nankai-3 / ATCC BAA-1280) GN=rps2 PE=3 SV=1	K02967	-	Archaea	Unknown	Euryarchaeota	Methanococci	Methanococcales	Methanococcaceae	Methanococcus	Methanococcus aeolicus	-	0	0	0	0	0	0	0	0	0	0	0	0	0	0	0	0	0	0	0	0	0	0	0	0	0	0	0	0	0	0	0	0	0	0	0	0	0	0
MG: UDP-N-acetylglucosamine 2-epimerase homolog OS=Methanococcus maripaludis (strain S2 / LL) GN=MMP0357 PE=1 SV=1 [Q6M0B4] Score: 204.0	K01791	5.1.-.-	Archaea	Unknown	Euryarchaeota	Methanococci	Methanococcales	Methanococcaceae	Methanococcus	Methanococcus maripaludis	-	0	0	1	0	4	4	8	7	0	0	0	0	0	0	2	0	0	0	0	0	0	0	0	0	0	0	0	0	0	0	0	0	0	0	0	0	0	0
CBID_METM5 Cobalt-precorrin-5B C(1)-methyltransferase OS=Methanococcus maripaludis (strain C5 / ATCC BAA-1333) GN=cbiD PE=3 SV=1	K02188	2.1.1.195	Archaea	Unknown	Euryarchaeota	Methanococci	Methanococcales	Methanococcaceae	Methanococcus	Methanococcus maripaludis	-	0	0	1	0	0	1	0	1	0	1	0	1	0	0	0	0	0	0	0	0	1	1	1	0	0	0	0	0	0	1	0	0	0	0	0	0	0	0
MG: Imidazole glycerol phosphate synthase subunit HisH 2 OS=Methanococcus maripaludis (strain S2 / LL) GN=hisH2 PE=3 SV=1 [P61783] Score: 229.0	K02501	2.4.2.-	Archaea	Unknown	Euryarchaeota	Methanococci	Methanococcales	Methanococcaceae	Methanococcus	Methanococcus maripaludis	-	0	0	0	0	0	1	0	0	0	0	0	0	0	0	0	0	0	0	0	0	0	0	0	0	0	0	0	0	0	0	0	0	0	0	0	0	0	0
MG: Glutamine synthetase OS=Methanococcus maripaludis (strain S2 / LL) GN=glnA PE=3 SV=1 [O59648] Score: 94.4	K01915	6.3.1.2	Archaea	Unknown	Euryarchaeota	Methanococci	Methanococcales	Methanococcaceae	Methanococcus	Methanococcus maripaludis	-	0	0	0	0	0	0	0	0	0	0	1	0	0	0	0	0	0	0	0	0	0	0	0	0	0	0	0	0	0	0	0	0	0	0	0	0	0	0
CHEB_METMP Chemotaxis response regulator protein-glutamate methylesterase OS=Methanococcus maripaludis (strain S2 / LL) GN=cheB PE=3 SV=1	K03412	3.1.1.61	Archaea	Unknown	Euryarchaeota	Methanococci	Methanococcales	Methanococcaceae	Methanococcus	Methanococcus maripaludis	-	0	0	0	0	0	0	0	0	0	0	0	0	1	0	0	0	0	0	0	0	0	0	0	0	0	0	0	0	0	0	0	0	0	0	0	0	0	0
VHUU_METMP F420-non-reducing hydrogenase vhu subunit U OS=Methanococcus maripaludis (strain S2 / LL) GN=vhuU PE=3 SV=2	-	1.12.99.-	Archaea	Unknown	Euryarchaeota	Methanococci	Methanococcales	Methanococcaceae	Methanococcus	Methanococcus maripaludis	-	0	0	0	0	0	0	0	0	0	0	0	0	1	0	0	0	0	0	0	0	0	0	0	0	0	0	0	0	0	0	0	0	0	0	0	0	0	0
MG: FO synthase subunit 2 1 OS=Methanococcus maripaludis (strain S2 / LL) GN=cofH1 PE=3 SV=1 [Q6M161] Score: 431.0	K11781	2.5.1.77	Archaea	Unknown	Euryarchaeota	Methanococci	Methanococcales	Methanococcaceae	Methanococcus	Methanococcus maripaludis	-	0	0	0	0	0	0	0	0	0	0	0	0	0	0	0	0	1	0	0	0	0	0	0	0	0	0	0	0	0	0	0	0	0	0	0	0	0	0
GATE_METMP Glutamyl-tRNA(Gln) amidotransferase subunit E OS=Methanococcus maripaludis (strain S2 / LL) GN=gatE PE=3 SV=1	K03330	6.3.5.-	Archaea	Unknown	Euryarchaeota	Methanococci	Methanococcales	Methanococcaceae	Methanococcus	Methanococcus maripaludis	-	0	0	0	0	0	0	0	0	0	0	0	0	0	0	0	0	0	0	0	1	0	0	0	0	0	0	0	0	0	0	0	0	0	0	0	0	0	0
SURE_METM6 5'-nucleotidase SurE OS=Methanococcus maripaludis (strain C6 / ATCC BAA-1332) GN=surE PE=3 SV=1	K03787	3.1.3.5	Archaea	Unknown	Euryarchaeota	Methanococci	Methanococcales	Methanococcaceae	Methanococcus	Methanococcus maripaludis	-	0	0	0	0	0	0	0	0	0	0	0	0	0	0	0	0	0	0	0	0	0	0	0	1	0	0	0	0	0	0	0	0	0	0	0	0	0	0
MG: Shikimate dehydrogenase (NADP(+)) OS=Methanococcus maripaludis (strain C7 / ATCC BAA-1331) GN=aroE PE=3 SV=1 [A6VFM7] Score: 154.0	K00014	1.1.1.25	Archaea	Unknown	Euryarchaeota	Methanococci	Methanococcales	Methanococcaceae	Methanococcus	Methanococcus maripaludis	-	0	0	0	0	0	0	0	0	0	0	0	0	0	0	0	0	0	0	0	0	0	0	0	0	0	1	0	0	0	0	0	0	0	0	0	0	0	0
NIFK_METMI Nitrogenase molybdenum-iron protein beta chain OS=Methanococcus maripaludis GN=nifK PE=3 SV=1	-	1.18.6.1	Archaea	Unknown	Euryarchaeota	Methanococci	Methanococcales	Methanococcaceae	Methanococcus	Methanococcus maripaludis	-	0	0	0	0	0	0	0	0	0	0	0	0	0	0	0	0	0	0	0	0	0	0	0	0	0	1	0	0	0	0	0	0	0	0	0	0	0	0
MG: Digeranylgeranylglycerophospholipid reductase OS=Methanococcus maripaludis (strain S2 / LL) GN=MMP0388 PE=3 SV=1 [Q6M083] Score: 48.1	K17830	1.3.7.11	Archaea	Unknown	Euryarchaeota	Methanococci	Methanococcales	Methanococcaceae	Methanococcus	Methanococcus maripaludis	-	0	0	0	0	0	0	0	0	0	0	0	0	0	0	0	0	0	0	0	0	0	0	0	0	0	1	0	0	0	0	0	0	0	0	0	0	0	0
MG: L-lysine 2,3-aminomutase OS=Methanococcus maripaludis (strain S2 / LL) GN=ablA PE=3 SV=1 [Q6LYX4] Score: 558.0	K01843	5.4.3.2	Archaea	Unknown	Euryarchaeota	Methanococci	Methanococcales	Methanococcaceae	Methanococcus	Methanococcus maripaludis	-	0	0	0	0	0	0	0	0	0	0	0	0	0	0	0	0	0	0	0	0	0	0	0	0	0	0	0	0	1	0	0	0	0	0	0	0	0	0
MG: Tetrahydromethanopterin:alpha-L-glutamate ligase OS=Methanococcus maripaludis (strain S2 / LL) GN=mptN PE=3 SV=1 [Q6LZC7] Score: 103.0	K15740	6.3.2.33	Archaea	Unknown	Euryarchaeota	Methanococci	Methanococcales	Methanococcaceae	Methanococcus	Methanococcus maripaludis	-	0	0	0	0	0	0	0	0	0	0	0	0	0	0	0	0	0	0	0	0	0	0	0	0	0	0	0	0	0	0	0	0	0	0	0	0	0	0
RS17E_METM5 30S ribosomal protein S17e OS=Methanococcus maripaludis (strain C5 / ATCC BAA-1333) GN=rps17e PE=3 SV=1	K02962	-	Archaea	Unknown	Euryarchaeota	Methanococci	Methanococcales	Methanococcaceae	Methanococcus	Methanococcus maripaludis	-	0	0	0	0	0	0	0	0	0	0	0	0	0	0	0	0	0	0	0	0	0	0	0	0	0	0	0	0	0	0	0	0	0	0	0	0	0	0
MG: DNA double-strand break repair Rad50 ATPase OS=Methanococcus maripaludis (strain S2 / LL) GN=rad50 PE=3 SV=1 [P62134] Score: 63.5	K03546	-	Archaea	Unknown	Euryarchaeota	Methanococci	Methanococcales	Methanococcaceae	Methanococcus	Methanococcus maripaludis	-	0	0	0	0	0	0	0	0	0	0	0	0	0	0	0	0	0	0	0	0	0	0	0	0	0	0	0	0	0	0	0	0	0	0	0	0	0	0
MG: LL-diaminopimelate aminotransferase OS=Methanococcus maripaludis (strain S2 / LL) GN=dapL PE=1 SV=1 [Q6LX26] Score: 442.0	K10206	2.6.1.83	Archaea	Unknown	Euryarchaeota	Methanococci	Methanococcales	Methanococcaceae	Methanococcus	Methanococcus maripaludis	-	0	0	0	0	0	0	0	0	0	0	0	0	0	0	0	0	0	0	0	0	0	0	0	0	0	0	0	0	0	0	0	0	0	0	0	0	0	0
PIMT_METVS Protein-L-isoaspartate O-methyltransferase OS=Methanococcus vannielii (strain SB / ATCC 35089 / DSM 1224) GN=pcm PE=3 SV=1	K00573	2.1.1.77	Archaea	Unknown	Euryarchaeota	Methanococci	Methanococcales	Methanococcaceae	Methanococcus	Methanococcus vannielii	-	0	0	0	0	0	0	0	0	0	0	0	0	0	2	0	3	0	0	0	0	0	0	0	0	0	1	0	0	0	0	0	0	0	0	0	0	0	0
SRP54_METVS Signal recognition particle 54 kDa protein OS=Methanococcus vannielii (strain SB / ATCC 35089 / DSM 1224) GN=srp54 PE=3 SV=1	K03106	-	Archaea	Unknown	Euryarchaeota	Methanococci	Methanococcales	Methanococcaceae	Methanococcus	Methanococcus vannielii	-	0	0	0	0	0	0	0	0	0	0	0	0	0	1	1	0	1	1	0	0	0	0	0	0	0	0	0	0	0	0	0	0	0	0	0	0	0	0
RS9_METVS 30S ribosomal protein S9 OS=Methanococcus vannielii (strain SB / ATCC 35089 / DSM 1224) GN=rps9 PE=3 SV=1	K02996	-	Archaea	Unknown	Euryarchaeota	Methanococci	Methanococcales	Methanococcaceae	Methanococcus	Methanococcus vannielii	-	0	0	0	0	0	0	0	0	0	0	0	0	0	0	0	0	0	0	0	0	0	0	0	0	0	0	1	0	0	0	0	0	0	0	0	0	0	0
MG: F420-non-reducing hydrogenase vhc iron-sulfur subunit D OS=Methanococcus voltae GN=vhcD PE=2 SV=1 [Q00405] Score: 169.0	-	1.12.99.-	Archaea	Unknown	Euryarchaeota	Methanococci	Methanococcales	Methanococcaceae	Methanococcus	Methanococcus voltae	-	94	38	24	17	83	112	80	74	41	27	31	24	83	73	38	87	68	75	45	76	9	6	10	9	94	54	53	57	39	36	20	26	19	16	24	19	10	5
FRHB_METVO Coenzyme F420 hydrogenase subunit beta OS=Methanococcus voltae GN=frhB PE=3 SV=1	-	1.12.98.1	Archaea	Unknown	Euryarchaeota	Methanococci	Methanococcales	Methanococcaceae	Methanococcus	Methanococcus voltae	-	0	0	1	0	0	2	0	0	0	0	0	0	0	0	0	0	0	0	0	0	0	0	0	0	0	0	0	1	0	0	1	0	0	1	0	2	0	0
MG: Polyferredoxin protein VhuB OS=Methanococcus voltae GN=vhuB PE=3 SV=2 [Q00388] Score: 49.3	-	-	Archaea	Unknown	Euryarchaeota	Methanococci	Methanococcales	Methanococcaceae	Methanococcus	Methanococcus voltae	-	0	0	0	0	0	0	0	0	0	0	0	0	0	0	0	1	0	0	0	0	0	0	0	0	0	0	0	0	0	0	0	0	0	0	0	0	0	1
MG: UDP-N-acetyl-D-mannosamine dehydrogenase OS=Methanococcus aeolicus (strain Nankai-3 / ATCC BAA-1280) GN=wecC PE=3 SV=1 [A6UU98] Score: 70.1	K02472	1.1.1.336	Archaea	Unknown	Euryarchaeota	Methanococci	Methanococcales	Methanococcaceae	Methanococcus	Unknown	-	0	0	0	0	0	0	1	0	0	0	0	0	0	0	0	0	0	0	0	0	0	0	0	1	0	0	0	0	0	0	0	1	0	0	0	0	0	0
SYFB_META3 Phenylalanine--tRNA ligase beta subunit OS=Methanococcus aeolicus (strain Nankai-3 / ATCC BAA-1280) GN=pheT PE=3 SV=1	K01890	6.1.1.20	Archaea	Unknown	Euryarchaeota	Methanococci	Methanococcales	Methanococcaceae	Methanococcus	Unknown	-	0	0	0	0	0	0	0	0	0	0	0	0	1	0	0	0	0	0	0	0	0	0	1	0	0	0	0	0	0	0	0	0	0	0	0	0	0	0
Y106_METM5 UPF0278 protein MmarC5_0106 OS=Methanococcus maripaludis (strain C5 / ATCC BAA-1333) GN=MmarC5_0106 PE=3 SV=1	K09006	-	Archaea	Unknown	Euryarchaeota	Methanococci	Methanococcales	Methanococcaceae	Methanococcus	Unknown	-	0	0	0	0	0	0	1	0	0	0	0	0	0	0	0	0	0	0	0	0	0	0	0	0	0	0	0	0	0	0	0	0	0	0	0	0	0	0
MG: FKBP-type peptidyl-prolyl cis-trans isomerase OS=Methanothermococcus thermolithotrophicus PE=1 SV=1 [O52980] Score: 154.0	-	5.2.1.8	Archaea	Unknown	Euryarchaeota	Methanococci	Methanococcales	Methanococcaceae	Methanothermococcus	Methanothermococcus thermolithotrophicus	-	0	0	0	0	10	16	6	1	16	9	4	5	0	0	0	0	0	0	0	0	0	0	0	0	0	0	0	0	0	0	0	0	0	0	0	0	0	0
MG: Phosphoribosylformylglycinamidine cyclo-ligase OS=Methanococcus vannielii (strain SB / ATCC 35089 / DSM 1224) GN=purM PE=3 SV=1 [A6UPQ3] Score: 108.0	K01933	6.3.3.1	Archaea	Unknown	Euryarchaeota	Methanococci	Methanococcales	Unknown	Unknown	Unknown	-	0	0	0	0	0	4	0	0	0	0	0	1	0	0	0	0	0	0	0	0	0	0	0	0	0	0	0	0	0	0	0	0	0	0	1	0	0	0
MG: UDP-N-acetyl-D-mannosamine dehydrogenase OS=Methanococcus maripaludis (strain C5 / ATCC BAA-1333) GN=wecC PE=3 SV=1 [A4FY94] Score: 213.0	K02472	1.1.1.336	Archaea	Unknown	Euryarchaeota	Methanococci	Methanococcales	Unknown	Unknown	Unknown	-	0	0	0	0	0	0	2	0	0	0	0	0	0	0	0	0	0	0	0	0	0	0	0	0	4	5	1	3	0	0	0	0	0	0	0	0	0	0
LADH_METJA Lactaldehyde dehydrogenase OS=Methanocaldococcus jannaschii (strain ATCC 43067 / DSM 2661 / JAL-1 / JCM 10045 / NBRC 100440) GN=MJ1411 PE=1 SV=2	K19266	1.2.1.22	Archaea	Unknown	Euryarchaeota	Methanococci	Methanococcales	Unknown	Unknown	Unknown	-	0	0	0	0	0	0	1	0	0	0	0	0	0	0	0	0	0	0	0	0	0	0	0	0	0	0	0	0	0	0	0	0	0	0	0	0	0	0
MG: 30S ribosomal protein S15 OS=Methanocaldococcus jannaschii (strain ATCC 43067 / DSM 2661 / JAL-1 / JCM 10045 / NBRC 100440) GN=rps15 PE=3 SV=2 [P54012] Score: 179.0	K02956	-	Archaea	Unknown	Euryarchaeota	Methanococci	Methanococcales	Unknown	Unknown	Unknown	-	0	0	0	0	0	0	0	0	0	0	0	0	0	0	0	0	0	0	0	0	0	0	0	0	0	0	2	1	0	0	0	0	0	0	0	0	0	0
SYM_METAR Methionine--tRNA ligase OS=Methanocella arvoryzae (strain DSM 22066 / NBRC 105507 / MRE50) GN=metG PE=3 SV=1	K01874	6.1.1.10	Archaea	Unknown	Euryarchaeota	Methanomicrobia	Methanocellales	Methanocellaceae	Methanocella	Methanocella arvoryzae	-	0	0	0	0	0	0	1	0	0	0	0	0	0	0	0	0	0	0	0	0	0	0	0	0	0	0	0	0	0	0	0	0	0	0	0	0	0	0
MG: DNA-directed RNA polymerase subunit L OS=Methanocella arvoryzae (strain DSM 22066 / NBRC 105507 / MRE50) GN=rpoL PE=3 SV=1 [Q0W8P1] Score: 50.8	K03056	2.7.7.6	Archaea	Unknown	Euryarchaeota	Methanomicrobia	Methanocellales	Methanocellaceae	Methanocella	Methanocella arvoryzae	-	0	0	0	0	0	0	0	0	1	1	0	0	1	3	3	5	4	4	0	1	0	0	0	0	0	3	2	1	0	0	0	0	0	0	0	0	0	0
ACYP_UNCMA Acylphosphatase OS=Uncultured methanogenic archaeon RC-I GN=acyP PE=3 SV=1	K01512	3.6.1.7	Archaea	Unknown	Euryarchaeota	Methanomicrobia	Methanocellales	Methanocellaceae	Methanocella	Methanocella arvoryzae	-	0	0	0	0	0	0	0	0	1	0	0	0	0	0	0	0	0	0	0	0	0	0	0	0	0	0	0	0	0	0	0	0	0	0	0	0	0	0
MG: Replication factor C large subunit OS=Methanocella arvoryzae (strain DSM 22066 / NBRC 105507 / MRE50) GN=rfcL PE=3 SV=1 [Q0W3P4] Score: 333.0	K04800	-	Archaea	Unknown	Euryarchaeota	Methanomicrobia	Methanocellales	Methanocellaceae	Methanocella	Methanocella arvoryzae	-	0	0	0	0	0	0	0	0	0	0	0	0	0	0	0	0	0	0	0	0	0	0	0	0	0	0	0	0	0	0	0	0	0	0	0	1	0	0
MG: UPF0147 protein Mlab_1361 OS=Methanocorpusculum labreanum (strain ATCC 43576 / DSM 4855 / Z) GN=Mlab_1361 PE=3 SV=1 [A2ST72] Score: 120.0	K09721	-	Archaea	Unknown	Euryarchaeota	Methanomicrobia	Methanomicrobiales	Methanocorpusculaceae	Methanocorpusculum	Methanocorpusculum labreanum	-	0	0	0	0	11	10	7	8	2	4	0	1	14	14	13	15	26	12	5	13	0	2	1	3	0	9	8	5	0	0	0	0	0	0	0	0	1	0
MG: Enolase OS=Methanocorpusculum labreanum (strain ATCC 43576 / DSM 4855 / Z) GN=eno PE=3 SV=1 [A2SSV1] Score: 536.0	K01689	4.2.1.11	Archaea	Unknown	Euryarchaeota	Methanomicrobia	Methanomicrobiales	Methanocorpusculaceae	Methanocorpusculum	Methanocorpusculum labreanum	-	0	0	0	0	0	0	0	0	0	0	0	0	1	0	2	0	3	5	1	1	0	0	0	0	0	0	0	0	0	0	0	0	0	0	0	0	0	0
MG: Phosphoglycerate kinase OS=Methanocorpusculum labreanum (strain ATCC 43576 / DSM 4855 / Z) GN=pgk PE=3 SV=1 [A2SSW4] Score: 550.0	K00927	2.7.2.3	Archaea	Unknown	Euryarchaeota	Methanomicrobia	Methanomicrobiales	Methanocorpusculaceae	Methanocorpusculum	Methanocorpusculum labreanum	-	0	0	0	0	0	0	0	0	0	0	0	0	0	0	1	0	1	0	0	0	0	0	0	0	0	0	0	0	0	0	0	0	0	0	0	0	0	0
MG: Translation initiation factor 1A OS=Methanocorpusculum labreanum (strain ATCC 43576 / DSM 4855 / Z) GN=eIF1A PE=3 SV=1 [A2STQ8] Score: 148.0	K03236	-	Archaea	Unknown	Euryarchaeota	Methanomicrobia	Methanomicrobiales	Methanocorpusculaceae	Methanocorpusculum	Methanocorpusculum labreanum	-	0	0	0	0	0	0	0	0	0	0	0	0	0	0	0	0	0	0	0	0	0	0	0	0	0	0	0	0	1	0	0	0	0	0	0	0	0	0
MG: DNA-directed RNA polymerase subunit H OS=Methanocorpusculum labreanum (strain ATCC 43576 / DSM 4855 / Z) GN=rpoH PE=3 SV=1 [A2SSM7] Score: 84.0	K03053	2.7.7.6	Archaea	Unknown	Euryarchaeota	Methanomicrobia	Methanomicrobiales	Methanocorpusculaceae	Methanocorpusculum	Methanocorpusculum labreanum	-	0	0	0	0	0	0	0	0	0	0	0	0	0	0	0	0	0	0	0	0	0	0	0	0	0	0	0	0	0	0	0	0	0	0	0	0	0	0
RS17E_METLZ 30S ribosomal protein S17e OS=Methanocorpusculum labreanum (strain ATCC 43576 / DSM 4855 / Z) GN=rps17e PE=3 SV=1	K02962	-	Archaea	Unknown	Euryarchaeota	Methanomicrobia	Methanomicrobiales	Methanocorpusculaceae	Methanocorpusculum	Methanocorpusculum labreanum	-	0	0	0	0	0	0	0	0	0	0	0	0	0	0	0	0	0	0	0	0	0	0	0	0	0	0	0	0	0	0	0	0	0	0	0	0	0	0
RL21_METMJ 50S ribosomal protein L21e OS=Methanoculleus marisnigri (strain ATCC 35101 / DSM 1498 / JR1) GN=rpl21e PE=3 SV=1	K02889	-	Archaea	Unknown	Euryarchaeota	Methanomicrobia	Methanomicrobiales	Methanomicrobiaceae	Methanoculleus	Methanoculleus marisnigri	-	1	1	0	0	0	0	0	0	0	0	0	0	0	0	0	0	0	0	0	0	0	0	0	0	0	0	0	0	0	0	0	0	0	0	0	0	0	0
MG: Prefoldin subunit alpha OS=Methanoculleus marisnigri (strain ATCC 35101 / DSM 1498 / JR1) GN=pfdA PE=3 SV=1 [A3CWZ2] Score: 223.0	K04797	-	Archaea	Unknown	Euryarchaeota	Methanomicrobia	Methanomicrobiales	Methanomicrobiaceae	Methanoculleus	Methanoculleus marisnigri	-	6	6	3	2	0	0	0	0	0	3	0	0	5	3	8	0	1	5	0	0	0	0	0	0	3	0	0	1	0	0	0	0	0	0	0	0	0	0
MG: 6,7-dimethyl-8-ribityllumazine synthase OS=Methanoculleus marisnigri (strain ATCC 35101 / DSM 1498 / JR1) GN=ribH PE=3 SV=1 [A3CRJ3] Score: 114.0	K00794	2.5.1.78	Archaea	Unknown	Euryarchaeota	Methanomicrobia	Methanomicrobiales	Methanomicrobiaceae	Methanoculleus	Methanoculleus marisnigri	-	2	1	0	0	1	0	1	0	0	0	1	0	2	0	4	1	2	3	0	0	2	2	0	0	0	0	0	0	0	0	4	1	0	0	0	0	0	0
MG: 30S ribosomal protein S6e OS=Methanoculleus marisnigri (strain ATCC 35101 / DSM 1498 / JR1) GN=rps6e PE=3 SV=1 [A3CSP5] Score: 212.0	K02991	-	Archaea	Unknown	Euryarchaeota	Methanomicrobia	Methanomicrobiales	Methanomicrobiaceae	Methanoculleus	Methanoculleus marisnigri	-	2	0	0	2	2	0	0	0	2	4	6	4	0	0	0	0	0	1	0	0	0	0	0	0	8	10	5	4	0	0	0	0	0	0	0	0	0	0
MG: V-type ATP synthase subunit E OS=Methanoculleus marisnigri (strain ATCC 35101 / DSM 1498 / JR1) GN=atpE PE=3 SV=1 [A3CS68] Score: 307.0	K02121	-	Archaea	Unknown	Euryarchaeota	Methanomicrobia	Methanomicrobiales	Methanomicrobiaceae	Methanoculleus	Methanoculleus marisnigri	-	1	2	0	0	5	3	2	2	13	17	3	8	6	36	19	45	12	22	19	16	0	0	2	0	23	21	22	5	0	0	0	0	0	0	0	0	1	0
MG: Translation initiation factor 6 OS=Methanoculleus marisnigri (strain ATCC 35101 / DSM 1498 / JR1) GN=eif6 PE=3 SV=1 [A3CWZ4] Score: 371.0	K03264	-	Archaea	Unknown	Euryarchaeota	Methanomicrobia	Methanomicrobiales	Methanomicrobiaceae	Methanoculleus	Methanoculleus marisnigri	-	2	0	0	0	1	2	0	2	2	0	1	0	14	5	4	2	5	8	0	0	0	0	0	0	2	2	1	1	0	0	1	0	0	0	0	0	0	0
MG: Adenylate kinase OS=Methanoculleus marisnigri (strain ATCC 35101 / DSM 1498 / JR1) GN=adkA PE=3 SV=1 [A3CT21] Score: 221.0	K00939	2.7.4.3	Archaea	Unknown	Euryarchaeota	Methanomicrobia	Methanomicrobiales	Methanomicrobiaceae	Methanoculleus	Methanoculleus marisnigri	-	1	1	0	0	8	4	10	7	4	4	4	4	10	8	8	9	10	11	5	8	0	0	0	0	12	7	6	3	0	0	0	3	0	0	0	0	6	5
MG: 30S ribosomal protein S3Ae OS=Methanoculleus marisnigri (strain ATCC 35101 / DSM 1498 / JR1) GN=rps3ae PE=3 SV=1 [A3CSL0] Score: 378.0	K02984	-	Archaea	Unknown	Euryarchaeota	Methanomicrobia	Methanomicrobiales	Methanomicrobiaceae	Methanoculleus	Methanoculleus marisnigri	-	3	1	3	1	17	14	12	8	5	2	2	2	45	43	29	40	45	23	13	32	4	2	0	0	15	20	14	5	13	9	7	7	2	2	9	6	8	13
MG: 1-(5-phosphoribosyl)-5-[(5-phosphoribosylamino)methylideneamino] imidazole-4-carboxamide isomerase OS=Methanoculleus marisnigri (strain ATCC 35101 / DSM 1498 / JR1) GN=hisA PE=3 SV=1 [A3CTR9] Score: 393.0	K01814	5.3.1.16	Archaea	Unknown	Euryarchaeota	Methanomicrobia	Methanomicrobiales	Methanomicrobiaceae	Methanoculleus	Methanoculleus marisnigri	-	4	0	1	0	0	0	1	0	0	0	0	0	0	0	0	0	0	0	0	0	0	1	0	0	0	0	0	0	0	0	0	0	0	0	0	0	0	0
MG: 50S ribosomal protein L18 OS=Methanoculleus marisnigri (strain ATCC 35101 / DSM 1498 / JR1) GN=rpl18 PE=3 SV=1 [A3CT16] Score: 306.0	K02881	-	Archaea	Unknown	Euryarchaeota	Methanomicrobia	Methanomicrobiales	Methanomicrobiaceae	Methanoculleus	Methanoculleus marisnigri	-	2	0	3	2	6	13	3	8	6	5	3	2	11	3	2	20	12	4	3	7	0	4	0	0	12	4	2	5	0	0	0	0	0	0	0	0	0	0
MG: 50S ribosomal protein L22 OS=Methanoculleus marisnigri (strain ATCC 35101 / DSM 1498 / JR1) GN=rpl22 PE=3 SV=1 [A3CT02] Score: 265.0	K02890	-	Archaea	Unknown	Euryarchaeota	Methanomicrobia	Methanomicrobiales	Methanomicrobiaceae	Methanoculleus	Methanoculleus marisnigri	-	3	5	5	4	0	2	3	3	1	0	1	2	7	1	0	2	2	0	0	2	0	0	0	2	0	0	0	0	0	0	0	0	0	0	0	0	0	0
MG: 30S ribosomal protein S19 OS=Methanoculleus marisnigri (strain ATCC 35101 / DSM 1498 / JR1) GN=rps19 PE=3 SV=1 [A3CT01] Score: 250.0	K02965	-	Archaea	Unknown	Euryarchaeota	Methanomicrobia	Methanomicrobiales	Methanomicrobiaceae	Methanoculleus	Methanoculleus marisnigri	-	1	2	0	0	16	11	11	19	3	2	0	1	18	18	11	22	16	16	5	9	0	0	0	0	1	1	0	3	1	1	0	0	0	0	0	0	0	1
PFDB_METMJ Prefoldin subunit beta OS=Methanoculleus marisnigri (strain ATCC 35101 / DSM 1498 / JR1) GN=pfdB PE=3 SV=1	K04798	-	Archaea	Unknown	Euryarchaeota	Methanomicrobia	Methanomicrobiales	Methanomicrobiaceae	Methanoculleus	Methanoculleus marisnigri	-	4	1	0	0	12	3	0	0	4	7	5	2	25	16	12	25	11	18	2	15	0	0	0	0	0	2	2	0	0	0	0	0	0	0	0	0	0	0
MG: Uncharacterized solute-binding protein Memar_1880 OS=Methanoculleus marisnigri (strain ATCC 35101 / DSM 1498 / JR1) GN=Memar_1880 PE=3 SV=1 [A3CWQ6] Score: 495.0	K15495	-	Archaea	Unknown	Euryarchaeota	Methanomicrobia	Methanomicrobiales	Methanomicrobiaceae	Methanoculleus	Methanoculleus marisnigri	-	1	0	0	0	16	16	17	13	11	12	14	18	0	0	0	0	0	0	0	0	17	19	22	20	91	130	111	86	34	55	46	55	90	75	105	100	59	151
MG: 2,3-bisphosphoglycerate-independent phosphoglycerate mutase OS=Methanoculleus marisnigri (strain ATCC 35101 / DSM 1498 / JR1) GN=apgM PE=3 SV=1 [A3CSK8] Score: 569.0	K15635	5.4.2.12	Archaea	Unknown	Euryarchaeota	Methanomicrobia	Methanomicrobiales	Methanomicrobiaceae	Methanoculleus	Methanoculleus marisnigri	-	1	1	0	0	0	0	0	0	0	0	0	0	3	0	0	0	0	0	0	0	0	0	0	0	0	0	0	0	0	0	0	0	0	0	0	0	0	0
MG: 50S ribosomal protein L30P OS=Methanoculleus marisnigri (strain ATCC 35101 / DSM 1498 / JR1) GN=rpl30p PE=3 SV=1 [A3CT18] Score: 100.0	K02907	-	Archaea	Unknown	Euryarchaeota	Methanomicrobia	Methanomicrobiales	Methanomicrobiaceae	Methanoculleus	Methanoculleus marisnigri	-	2	1	0	0	2	4	0	0	2	6	3	2	2	4	2	0	4	0	0	0	0	0	0	0	8	2	2	3	2	0	4	1	0	1	0	1	1	0
MG: 30S ribosomal protein S8e OS=Methanoculleus marisnigri (strain ATCC 35101 / DSM 1498 / JR1) GN=rps8e PE=3 SV=1 [A3CSQ2] Score: 241.0	K02995	-	Archaea	Unknown	Euryarchaeota	Methanomicrobia	Methanomicrobiales	Methanomicrobiaceae	Methanoculleus	Methanoculleus marisnigri	-	2	0	0	0	0	0	0	0	0	0	0	0	2	0	0	0	0	0	0	0	0	0	0	0	0	0	0	0	0	0	0	0	0	0	0	0	0	0
MG: Transcription factor E OS=Methanoculleus marisnigri (strain ATCC 35101 / DSM 1498 / JR1) GN=tfe PE=3 SV=1 [A3CVQ3] Score: 320.0	K03136	-	Archaea	Unknown	Euryarchaeota	Methanomicrobia	Methanomicrobiales	Methanomicrobiaceae	Methanoculleus	Methanoculleus marisnigri	-	0	0	0	0	2	0	2	4	8	1	2	0	1	2	0	0	2	0	0	0	0	0	0	0	0	0	0	0	0	0	0	1	0	0	0	0	1	2
MG: UPF0173 metal-dependent hydrolase Memar_1421 OS=Methanoculleus marisnigri (strain ATCC 35101 / DSM 1498 / JR1) GN=Memar_1421 PE=3 SV=1 [A3CVF0] Score: 375.0	-	-	Archaea	Unknown	Euryarchaeota	Methanomicrobia	Methanomicrobiales	Methanomicrobiaceae	Methanoculleus	Methanoculleus marisnigri	-	0	0	0	0	1	1	0	0	0	0	0	0	0	1	1	0	1	3	0	1	0	3	0	0	12	12	8	6	19	17	7	11	13	8	13	11	4	1
MG: 3-dehydroquinate dehydratase OS=Methanoculleus marisnigri (strain ATCC 35101 / DSM 1498 / JR1) GN=aroD PE=3 SV=1 [A3CV25] Score: 264.0	K03785	4.2.1.10	Archaea	Unknown	Euryarchaeota	Methanomicrobia	Methanomicrobiales	Methanomicrobiaceae	Methanoculleus	Methanoculleus marisnigri	-	0	0	0	0	2	0	0	0	0	0	0	0	0	0	0	0	0	0	0	0	0	0	0	0	0	0	0	0	0	0	0	0	0	0	0	0	0	0
MG: 50S ribosomal protein L1 OS=Methanoculleus marisnigri (strain ATCC 35101 / DSM 1498 / JR1) GN=rpl1 PE=3 SV=1 [A3CSJ6] Score: 392.0	K02863	-	Archaea	Unknown	Euryarchaeota	Methanomicrobia	Methanomicrobiales	Methanomicrobiaceae	Methanoculleus	Methanoculleus marisnigri	-	0	0	0	0	6	9	0	1	5	3	5	2	6	8	10	6	4	4	1	4	0	0	0	0	10	9	5	1	1	0	0	0	0	0	0	0	0	0
MG: 50S ribosomal protein L5 OS=Methanoculleus marisnigri (strain ATCC 35101 / DSM 1498 / JR1) GN=rpl5 PE=3 SV=1 [A3CT10] Score: 297.0	K02931	-	Archaea	Unknown	Euryarchaeota	Methanomicrobia	Methanomicrobiales	Methanomicrobiaceae	Methanoculleus	Methanoculleus marisnigri	-	0	0	0	0	2	1	0	0	1	0	0	1	10	8	11	0	6	3	0	5	0	0	0	0	0	0	0	0	0	0	0	0	0	0	0	0	0	0
MG: PyrE-like protein OS=Methanoculleus marisnigri (strain ATCC 35101 / DSM 1498 / JR1) GN=Memar_0272 PE=3 SV=1 [A3CS56] Score: 366.0	K00762	-	Archaea	Unknown	Euryarchaeota	Methanomicrobia	Methanomicrobiales	Methanomicrobiaceae	Methanoculleus	Methanoculleus marisnigri	-	0	0	0	0	10	2	0	2	26	18	12	14	22	19	23	31	31	27	6	21	0	0	0	0	3	7	12	3	0	0	0	0	0	0	0	0	5	2
MG: DNA repair and recombination protein RadA OS=Methanoculleus marisnigri (strain ATCC 35101 / DSM 1498 / JR1) GN=radA PE=3 SV=1 [A3CWU4] Score: 583.0	K04483	-	Archaea	Unknown	Euryarchaeota	Methanomicrobia	Methanomicrobiales	Methanomicrobiaceae	Methanoculleus	Methanoculleus marisnigri	-	0	0	0	0	1	4	1	0	2	2	2	1	0	0	0	0	0	0	0	0	0	0	0	0	19	18	12	6	2	4	4	6	0	0	6	4	8	10
MG: UPF0145 protein Memar_1285 OS=Methanoculleus marisnigri (strain ATCC 35101 / DSM 1498 / JR1) GN=Memar_1285 PE=3 SV=1 [A3CV15] Score: 183.0	-	-	Archaea	Unknown	Euryarchaeota	Methanomicrobia	Methanomicrobiales	Methanomicrobiaceae	Methanoculleus	Methanoculleus marisnigri	-	0	0	0	0	2	0	0	0	1	1	0	0	0	0	0	0	0	0	0	0	0	0	0	0	0	0	0	0	0	0	0	0	0	0	0	0	0	0
MG: Geranylgeranylglyceryl phosphate synthase OS=Methanoculleus marisnigri (strain ATCC 35101 / DSM 1498 / JR1) GN=Memar_0769 PE=3 SV=1 [A3CTK2] Score: 405.0	K17104	2.5.1.41	Archaea	Unknown	Euryarchaeota	Methanomicrobia	Methanomicrobiales	Methanomicrobiaceae	Methanoculleus	Methanoculleus marisnigri	-	0	0	0	0	0	1	0	0	0	0	0	0	0	0	0	0	0	0	0	0	0	0	0	0	0	0	0	0	0	0	0	0	0	0	0	0	0	0
MG: 2-phospho-L-lactate guanylyltransferase OS=Methanoculleus marisnigri (strain ATCC 35101 / DSM 1498 / JR1) GN=cofC PE=3 SV=1 [A3CWL3] Score: 389.0	K14941	2.7.7.68	Archaea	Unknown	Euryarchaeota	Methanomicrobia	Methanomicrobiales	Methanomicrobiaceae	Methanoculleus	Methanoculleus marisnigri	-	0	0	0	0	0	1	0	4	0	0	0	0	0	0	0	0	0	0	0	0	0	0	0	0	0	0	0	0	0	0	0	0	0	0	0	0	0	0
MG: Translation initiation factor 2 subunit beta OS=Methanoculleus marisnigri (strain ATCC 35101 / DSM 1498 / JR1) GN=eif2b PE=3 SV=1 [A3CXJ3] Score: 381.0	K03238	-	Archaea	Unknown	Euryarchaeota	Methanomicrobia	Methanomicrobiales	Methanomicrobiaceae	Methanoculleus	Methanoculleus marisnigri	-	0	0	0	0	0	0	3	0	0	1	0	0	2	3	0	4	3	0	0	0	0	0	0	0	1	0	0	0	0	0	0	0	0	0	0	0	0	0
MG: Probable deoxycytidine triphosphate deaminase OS=Methanoculleus marisnigri (strain ATCC 35101 / DSM 1498 / JR1) GN=dcd PE=3 SV=1 [A3CTK0] Score: 333.0	K01494	3.5.4.13	Archaea	Unknown	Euryarchaeota	Methanomicrobia	Methanomicrobiales	Methanomicrobiaceae	Methanoculleus	Methanoculleus marisnigri	-	0	0	0	0	0	0	2	1	0	0	0	0	0	0	0	0	0	0	0	0	0	0	0	0	0	0	0	0	0	0	0	0	0	0	0	0	0	1
MG: 30S ribosomal protein S15 OS=Methanoculleus marisnigri (strain ATCC 35101 / DSM 1498 / JR1) GN=rps15 PE=3 SV=1 [A3CSL3] Score: 267.0	K02956	-	Archaea	Unknown	Euryarchaeota	Methanomicrobia	Methanomicrobiales	Methanomicrobiaceae	Methanoculleus	Methanoculleus marisnigri	-	0	0	0	0	0	0	0	4	0	0	0	0	0	0	0	1	2	0	0	0	0	0	0	0	0	0	0	0	0	0	0	0	0	0	0	0	0	0
MG: 30S ribosomal protein S8 OS=Methanoculleus marisnigri (strain ATCC 35101 / DSM 1498 / JR1) GN=rps8 PE=3 SV=1 [A3CT12] Score: 246.0	K02994	-	Archaea	Unknown	Euryarchaeota	Methanomicrobia	Methanomicrobiales	Methanomicrobiaceae	Methanoculleus	Methanoculleus marisnigri	-	0	0	0	0	0	0	0	0	1	2	0	1	2	1	1	1	2	1	0	0	0	0	0	0	0	3	0	0	0	0	0	0	0	0	0	0	0	0
MG: DNA polymerase IV OS=Methanoculleus marisnigri (strain ATCC 35101 / DSM 1498 / JR1) GN=dbh PE=3 SV=1 [A3CSG3] Score: 477.0	K04479	2.7.7.7	Archaea	Unknown	Euryarchaeota	Methanomicrobia	Methanomicrobiales	Methanomicrobiaceae	Methanoculleus	Methanoculleus marisnigri	-	0	0	0	0	0	0	0	0	0	0	1	0	0	0	0	0	0	0	0	0	0	0	1	0	0	0	0	0	0	0	0	0	0	0	0	0	0	0
MG: UPF0316 protein Memar_1511 OS=Methanoculleus marisnigri (strain ATCC 35101 / DSM 1498 / JR1) GN=Memar_1511 PE=3 SV=1 [A3CVP0] Score: 197.0	-	-	Archaea	Unknown	Euryarchaeota	Methanomicrobia	Methanomicrobiales	Methanomicrobiaceae	Methanoculleus	Methanoculleus marisnigri	-	0	0	0	0	0	0	0	0	0	0	0	0	0	2	0	0	0	0	0	0	0	0	0	0	0	0	0	0	0	0	0	0	0	0	0	0	0	0
MG: V-type ATP synthase subunit F OS=Methanoculleus marisnigri (strain ATCC 35101 / DSM 1498 / JR1) GN=atpF PE=3 SV=1 [A3CS70] Score: 175.0	K02122	-	Archaea	Unknown	Euryarchaeota	Methanomicrobia	Methanomicrobiales	Methanomicrobiaceae	Methanoculleus	Methanoculleus marisnigri	-	0	0	0	0	0	0	0	0	0	0	0	0	0	0	0	0	2	5	0	0	0	0	0	0	0	1	0	0	0	0	0	0	0	0	0	0	0	0
MG: Orotate phosphoribosyltransferase OS=Methanoculleus marisnigri (strain ATCC 35101 / DSM 1498 / JR1) GN=pyrE PE=3 SV=1 [A3CU84] Score: 274.0	K00762	2.4.2.10	Archaea	Unknown	Euryarchaeota	Methanomicrobia	Methanomicrobiales	Methanomicrobiaceae	Methanoculleus	Methanoculleus marisnigri	-	0	0	0	0	0	0	0	0	0	0	0	0	0	0	0	0	2	0	0	0	0	0	0	0	0	0	0	0	0	0	0	0	0	0	0	0	0	0
MG: 30S ribosomal protein S13 OS=Methanoculleus marisnigri (strain ATCC 35101 / DSM 1498 / JR1) GN=rps13 PE=3 SV=1 [A3CWH6] Score: 265.0	K02952	-	Archaea	Unknown	Euryarchaeota	Methanomicrobia	Methanomicrobiales	Methanomicrobiaceae	Methanoculleus	Methanoculleus marisnigri	-	0	0	0	0	0	0	0	0	0	0	0	0	0	0	0	0	3	2	0	0	0	0	0	0	3	1	0	0	0	0	0	0	0	0	0	0	0	0
MG: Nicotinamide-nucleotide adenylyltransferase OS=Methanoculleus marisnigri (strain ATCC 35101 / DSM 1498 / JR1) GN=Memar_1582 PE=3 SV=1 [A3CVW1] Score: 305.0	K00952	2.7.7.1	Archaea	Unknown	Euryarchaeota	Methanomicrobia	Methanomicrobiales	Methanomicrobiaceae	Methanoculleus	Methanoculleus marisnigri	-	0	0	0	0	0	0	0	0	0	0	0	0	0	0	0	0	4	0	0	0	0	0	0	0	0	0	0	0	0	0	0	0	0	0	0	0	0	0
MG: tRNA (cytidine(56)-2'-O)-methyltransferase OS=Methanoculleus marisnigri (strain ATCC 35101 / DSM 1498 / JR1) GN=Memar_1522 PE=3 SV=1 [A3CVQ1] Score: 323.0	K07254	2.1.1.206	Archaea	Unknown	Euryarchaeota	Methanomicrobia	Methanomicrobiales	Methanomicrobiaceae	Methanoculleus	Methanoculleus marisnigri	-	0	0	0	0	0	0	0	0	0	0	0	0	0	0	0	0	2	0	0	0	0	0	0	0	0	0	0	0	0	0	0	0	0	0	0	0	0	0
MG: Ribonuclease P protein component 2 OS=Methanoculleus marisnigri (strain ATCC 35101 / DSM 1498 / JR1) GN=rnp2 PE=3 SV=1 [A3CW56] Score: 254.0	K03537	3.1.26.5	Archaea	Unknown	Euryarchaeota	Methanomicrobia	Methanomicrobiales	Methanomicrobiaceae	Methanoculleus	Methanoculleus marisnigri	-	0	0	0	0	0	0	0	0	0	0	0	0	0	0	0	0	2	0	0	0	0	0	0	0	0	0	0	0	0	0	0	0	0	0	0	0	0	0
MG: Elongation factor 1-beta OS=Methanoculleus marisnigri (strain ATCC 35101 / DSM 1498 / JR1) GN=ef1b PE=3 SV=1 [A3CYB6] Score: 132.0	K03232	-	Archaea	Unknown	Euryarchaeota	Methanomicrobia	Methanomicrobiales	Methanomicrobiaceae	Methanoculleus	Methanoculleus marisnigri	-	0	0	0	0	0	0	0	0	0	0	0	0	0	0	0	0	3	4	0	0	0	0	0	0	0	0	0	0	0	0	0	0	0	0	0	0	0	0
MG: Cysteate synthase OS=Methanoculleus marisnigri (strain ATCC 35101 / DSM 1498 / JR1) GN=Memar_0111 PE=3 SV=1 [A3CRP6] Score: 669.0	K15527	2.5.1.76	Archaea	Unknown	Euryarchaeota	Methanomicrobia	Methanomicrobiales	Methanomicrobiaceae	Methanoculleus	Methanoculleus marisnigri	-	0	0	0	0	0	0	0	0	0	0	0	0	0	0	0	0	0	0	0	0	0	1	0	0	0	0	0	0	0	0	0	0	0	0	0	0	0	0
MG: Hydroxyethylthiazole kinase OS=Methanoculleus marisnigri (strain ATCC 35101 / DSM 1498 / JR1) GN=thiM PE=3 SV=1 [A3CS46] Score: 382.0	K00878	2.7.1.50	Archaea	Unknown	Euryarchaeota	Methanomicrobia	Methanomicrobiales	Methanomicrobiaceae	Methanoculleus	Methanoculleus marisnigri	-	0	0	0	0	0	0	0	0	0	0	0	0	0	0	0	0	0	0	0	0	0	0	0	0	2	0	0	0	0	0	0	0	0	0	0	0	0	0
MG: DNA repair and recombination protein RadB OS=Methanoculleus marisnigri (strain ATCC 35101 / DSM 1498 / JR1) GN=radB PE=3 SV=1 [A3CXI2] Score: 379.0	K04484	-	Archaea	Unknown	Euryarchaeota	Methanomicrobia	Methanomicrobiales	Methanomicrobiaceae	Methanoculleus	Methanoculleus marisnigri	-	0	0	0	0	0	0	0	0	0	0	0	0	0	0	0	0	0	0	0	0	0	0	0	0	1	0	0	0	0	0	0	0	0	0	0	0	0	0
MG: Argininosuccinate lyase OS=Methanoculleus marisnigri (strain ATCC 35101 / DSM 1498 / JR1) GN=argH PE=3 SV=1 [A3CTT5] Score: 143.0	K01755	4.3.2.1	Archaea	Unknown	Euryarchaeota	Methanomicrobia	Methanomicrobiales	Methanomicrobiaceae	Methanoculleus	Methanoculleus marisnigri	-	0	0	0	0	0	0	0	0	0	0	0	0	0	0	0	0	0	0	0	0	0	0	0	0	0	0	1	0	0	0	0	0	0	0	0	0	0	0
MG: Phosphoribosylaminoimidazole-succinocarboxamide synthase OS=Methanoculleus marisnigri (strain ATCC 35101 / DSM 1498 / JR1) GN=purC PE=3 SV=1 [A3CWL5] Score: 419.0	K01923	6.3.2.6	Archaea	Unknown	Euryarchaeota	Methanomicrobia	Methanomicrobiales	Methanomicrobiaceae	Methanoculleus	Methanoculleus marisnigri	-	0	0	0	0	0	0	0	0	0	0	0	0	0	0	0	0	0	0	0	0	0	0	0	0	0	0	0	0	0	0	0	0	0	0	0	0	0	0
MG: Aspartate carbamoyltransferase regulatory chain OS=Methanoculleus marisnigri (strain ATCC 35101 / DSM 1498 / JR1) GN=pyrI PE=3 SV=1 [A3CW67] Score: 192.0	K00610	-	Archaea	Unknown	Euryarchaeota	Methanomicrobia	Methanomicrobiales	Methanomicrobiaceae	Methanoculleus	Methanoculleus marisnigri	-	0	0	0	0	0	0	0	0	0	0	0	0	0	0	0	0	0	0	0	0	0	0	0	0	0	0	0	0	0	0	0	0	0	0	0	0	0	0
MG: DNA-directed RNA polymerase subunit N OS=Methanoculleus marisnigri (strain ATCC 35101 / DSM 1498 / JR1) GN=rpoN PE=3 SV=1 [A3CWI3] Score: 122.0	K03058	2.7.7.6	Archaea	Unknown	Euryarchaeota	Methanomicrobia	Methanomicrobiales	Methanomicrobiaceae	Methanoculleus	Methanoculleus marisnigri	-	0	0	0	0	0	0	0	0	0	0	0	0	0	0	0	0	0	0	0	0	0	0	0	0	0	0	0	0	0	0	0	0	0	0	0	0	0	0
MG: NAD kinase OS=Methanoculleus marisnigri (strain ATCC 35101 / DSM 1498 / JR1) GN=nadK PE=3 SV=1 [A3CU51] Score: 408.0	K00858	2.7.1.23	Archaea	Unknown	Euryarchaeota	Methanomicrobia	Methanomicrobiales	Methanomicrobiaceae	Methanoculleus	Methanoculleus marisnigri	-	0	0	0	0	0	0	0	0	0	0	0	0	0	0	0	0	0	0	0	0	0	0	0	0	0	0	0	0	0	0	0	0	0	0	0	0	0	0
MG: Probable thymidylate kinase OS=Methanoculleus marisnigri (strain ATCC 35101 / DSM 1498 / JR1) GN=tmk PE=3 SV=1 [A3CVV0] Score: 308.0	K00943	2.7.4.9	Archaea	Unknown	Euryarchaeota	Methanomicrobia	Methanomicrobiales	Methanomicrobiaceae	Methanoculleus	Methanoculleus marisnigri	-	0	0	0	0	0	0	0	0	0	0	0	0	0	0	0	0	0	0	0	0	0	0	0	0	0	0	0	0	0	0	0	0	0	0	0	0	0	0
Y1002_METMJ UPF0290 protein Memar_1002 OS=Methanoculleus marisnigri (strain ATCC 35101 / DSM 1498 / JR1) GN=Memar_1002 PE=3 SV=1	K19664	2.7.7.67	Archaea	Unknown	Euryarchaeota	Methanomicrobia	Methanomicrobiales	Methanomicrobiaceae	Methanoculleus	Methanoculleus marisnigri	-	0	0	0	0	0	0	0	0	0	0	0	0	0	0	0	0	0	0	0	0	0	0	0	0	0	0	0	0	0	0	0	0	0	0	0	0	0	0
MG: Protein-export membrane protein SecD OS=Methanolacinia petrolearia (strain DSM 11571 / OCM 486 / SEBR 4847) GN=secD PE=3 SV=1 [E1RHR1] Score: 363.0	K03072	-	Archaea	Unknown	Euryarchaeota	Methanomicrobia	Methanomicrobiales	Methanomicrobiaceae	Methanoplanus	Methanoplanus petrolearius	-	0	0	0	0	1	4	0	6	1	1	0	1	0	0	0	0	0	0	0	0	0	0	0	0	0	0	0	0	0	0	0	0	0	0	0	0	0	0
MG: Protein-export membrane protein SecF OS=Methanolacinia petrolearia (strain DSM 11571 / OCM 486 / SEBR 4847) GN=secF PE=3 SV=1 [E1RHR2] Score: 253.0	K03074	-	Archaea	Unknown	Euryarchaeota	Methanomicrobia	Methanomicrobiales	Methanomicrobiaceae	Methanoplanus	Methanoplanus petrolearius	-	0	0	0	0	8	9	6	9	4	4	4	4	0	0	0	0	0	0	0	0	0	0	0	0	0	0	0	0	0	0	0	0	0	0	0	0	0	0
SPSS2_METB6 O-phospho-L-seryl-tRNA:Cys-tRNA synthase 2 OS=Methanoregula boonei (strain 6A8) GN=Mboo_2045 PE=3 SV=1	K06868	2.5.1.73	Archaea	Unknown	Euryarchaeota	Methanomicrobia	Methanomicrobiales	Methanoregulaceae	Methanoregula	Methanoregula boonei	-	0	0	0	0	0	0	1	0	0	0	0	0	0	0	0	0	0	0	0	0	0	0	0	0	0	0	0	0	0	0	0	0	0	0	0	0	0	0
MG: Glycerol-1-phosphate dehydrogenase [NAD(P)+] OS=Methanoregula boonei (strain 6A8) GN=egsA PE=3 SV=1 [A7I9R4] Score: 186.0	K00096	1.1.1.261	Archaea	Unknown	Euryarchaeota	Methanomicrobia	Methanomicrobiales	Methanoregulaceae	Methanoregula	Methanoregula boonei	-	0	0	0	0	0	0	0	0	1	0	0	0	0	0	0	0	0	0	0	0	0	0	0	0	0	0	0	0	0	0	0	0	0	0	0	0	0	0
MG: Tryptophan synthase alpha chain OS=Methanoregula boonei (strain 6A8) GN=trpA PE=3 SV=1 [A7I4T3] Score: 233.0	K01695	4.2.1.20	Archaea	Unknown	Euryarchaeota	Methanomicrobia	Methanomicrobiales	Methanoregulaceae	Methanoregula	Methanoregula boonei	-	0	0	0	0	0	0	0	0	1	0	1	0	0	0	0	0	0	0	0	0	0	0	0	0	0	0	0	0	0	0	0	0	0	0	0	0	0	0
MG: 5'-deoxyadenosine deaminase OS=Methanoregula boonei (strain 6A8) GN=dadD PE=3 SV=1 [A7I6C5] Score: 576.0	K12960	3.5.4.41	Archaea	Unknown	Euryarchaeota	Methanomicrobia	Methanomicrobiales	Methanoregulaceae	Methanoregula	Methanoregula boonei	-	0	0	0	0	0	0	0	0	0	0	0	1	0	0	0	0	0	0	0	0	0	0	0	0	0	0	0	0	1	0	0	0	0	0	0	0	0	0
MG: CCA-adding enzyme OS=Methanoregula boonei (strain 6A8) GN=cca PE=3 SV=1 [A7I912] Score: 443.0	K07558	2.7.7.72	Archaea	Unknown	Euryarchaeota	Methanomicrobia	Methanomicrobiales	Methanoregulaceae	Methanoregula	Methanoregula boonei	-	0	0	0	0	0	0	0	0	0	0	0	0	2	0	0	0	0	0	0	0	0	0	0	0	0	0	0	0	0	0	0	0	0	0	0	0	0	0
Y195_METB6 Putative HTH-type transcriptional regulatory protein Mboo_0195 OS=Methanoregula boonei (strain 6A8) GN=Mboo_0195 PE=3 SV=1	K07728	-	Archaea	Unknown	Euryarchaeota	Methanomicrobia	Methanomicrobiales	Methanoregulaceae	Methanoregula	Methanoregula boonei	-	0	0	0	0	0	0	0	0	0	0	0	0	0	0	0	0	0	0	0	0	0	0	0	0	0	0	0	0	0	0	0	0	0	1	0	0	0	0
MG: 30S ribosomal protein S24e OS=Methanosphaerula palustris (strain ATCC BAA-1556 / DSM 19958 / E1-9c) GN=rps24e PE=3 SV=1 [B8GFC3] Score: 124.0	K02974	-	Archaea	Unknown	Euryarchaeota	Methanomicrobia	Methanomicrobiales	Methanoregulaceae	Methanosphaerula	Methanosphaerula palustris	-	0	0	0	0	4	4	0	0	6	3	4	1	10	9	7	3	6	8	1	1	0	0	0	0	0	0	0	0	0	0	0	0	0	0	0	0	0	0
FEN_METPE Flap endonuclease 1 OS=Methanosphaerula palustris (strain ATCC BAA-1556 / DSM 19958 / E1-9c) GN=fen PE=3 SV=1	K04799	3.1.-.-	Archaea	Unknown	Euryarchaeota	Methanomicrobia	Methanomicrobiales	Methanoregulaceae	Methanosphaerula	Methanosphaerula palustris	-	0	0	0	0	0	0	0	0	0	0	0	0	0	0	0	0	0	0	0	0	0	0	0	1	0	0	0	0	0	0	0	0	0	0	0	0	0	0
MG: DNA primase small subunit PriS OS=Methanosphaerula palustris (strain ATCC BAA-1556 / DSM 19958 / E1-9c) GN=priS PE=3 SV=1 [B8GGQ0] Score: 447.0	K02683	2.7.7.-	Archaea	Unknown	Euryarchaeota	Methanomicrobia	Methanomicrobiales	Methanoregulaceae	Methanosphaerula	Methanosphaerula palustris	-	0	0	0	0	0	0	0	0	0	0	0	0	0	0	0	0	0	0	0	0	0	0	0	0	0	0	0	0	0	0	0	0	0	0	0	0	0	0
MOAC_METB6 Probable cyclic pyranopterin monophosphate synthase accessory protein OS=Methanoregula boonei (strain 6A8) GN=moaC PE=3 SV=1	K03637	-	Archaea	Unknown	Euryarchaeota	Methanomicrobia	Methanomicrobiales	Methanoregulaceae	Unknown	Unknown	-	5	1	0	0	1	0	0	0	0	0	0	0	0	0	0	0	0	0	0	0	0	0	0	0	0	0	0	0	0	0	0	0	0	0	0	0	0	0
MG: Probable cyclic pyranopterin monophosphate synthase accessory protein OS=Methanosphaerula palustris (strain ATCC BAA-1556 / DSM 19958 / E1-9c) GN=moaC PE=3 SV=1 [B8GEZ7] Score: 77.8	K03637	-	Archaea	Unknown	Euryarchaeota	Methanomicrobia	Methanomicrobiales	Methanoregulaceae	Unknown	Unknown	-	0	0	0	0	0	0	0	0	0	0	0	0	0	0	0	0	0	0	0	0	0	0	0	0	0	0	0	0	0	0	0	0	0	0	0	0	0	0
MG: 30S ribosomal protein S4e OS=Methanospirillum hungatei JF-1 (strain ATCC 27890 / DSM 864 / NBRC 100397 / JF-1) GN=rps4e PE=3 SV=1 [Q2FT37] Score: 280.0	K02987	-	Archaea	Unknown	Euryarchaeota	Methanomicrobia	Methanomicrobiales	Methanospirillaceae	Methanospirillum	Methanospirillum hungatei	-	0	1	0	0	0	0	0	0	0	0	0	0	1	5	7	0	5	2	2	4	0	0	0	0	4	10	11	11	8	9	2	0	0	0	1	0	0	0
MG: Nitrogenase iron protein OS=Methanospirillum hungatei JF-1 (strain ATCC 27890 / DSM 864 / NBRC 100397 / JF-1) GN=nifH PE=3 SV=1 [Q2FUB7] Score: 243.0	K02588	1.18.6.1	Archaea	Unknown	Euryarchaeota	Methanomicrobia	Methanomicrobiales	Methanospirillaceae	Methanospirillum	Methanospirillum hungatei	-	0	0	0	1	0	0	0	0	0	0	0	0	0	0	0	0	0	0	0	0	0	0	0	0	0	0	0	0	0	0	0	0	0	0	0	0	0	0
MG: Glutamyl-tRNA(Gln) amidotransferase subunit A OS=Methanospirillum hungatei JF-1 (strain ATCC 27890 / DSM 864 / NBRC 100397 / JF-1) GN=gatA PE=3 SV=1 [Q2FQM9] Score: 526.0	K02433	6.3.5.7	Archaea	Unknown	Euryarchaeota	Methanomicrobia	Methanomicrobiales	Methanospirillaceae	Methanospirillum	Methanospirillum hungatei	-	0	0	0	0	0	0	1	0	0	0	0	0	0	0	0	0	0	0	0	0	0	0	0	0	0	0	0	0	0	0	0	0	0	0	0	0	0	0
MG: Probable L-aspartate dehydrogenase OS=Methanospirillum hungatei JF-1 (strain ATCC 27890 / DSM 864 / NBRC 100397 / JF-1) GN=nadX PE=3 SV=1 [Q2FSK9] Score: 289.0	K06989	1.4.1.21	Archaea	Unknown	Euryarchaeota	Methanomicrobia	Methanomicrobiales	Methanospirillaceae	Methanospirillum	Methanospirillum hungatei	-	0	0	0	0	0	0	0	0	0	0	0	0	1	1	0	1	0	0	0	0	0	0	0	0	0	0	0	0	0	0	0	0	0	0	0	0	0	0
MG: Serine--tRNA ligase OS=Methanospirillum hungatei JF-1 (strain ATCC 27890 / DSM 864 / NBRC 100397 / JF-1) GN=serS PE=3 SV=1 [Q2FS27] Score: 212.0	K01875	6.1.1.11	Archaea	Unknown	Euryarchaeota	Methanomicrobia	Methanomicrobiales	Methanospirillaceae	Methanospirillum	Methanospirillum hungatei	-	0	0	0	0	0	0	0	0	0	0	0	0	0	0	0	0	0	2	0	0	0	0	0	0	0	0	0	0	0	0	0	0	0	0	0	0	0	0
MG: Energy-coupling factor transporter ATP-binding protein EcfA2 OS=Methanospirillum hungatei JF-1 (strain ATCC 27890 / DSM 864 / NBRC 100397 / JF-1) GN=ecfA2 PE=3 SV=1 [Q2FRT7] Score: 138.0	K02006	3.6.3.-	Archaea	Unknown	Euryarchaeota	Methanomicrobia	Methanomicrobiales	Methanospirillaceae	Methanospirillum	Methanospirillum hungatei	-	0	0	0	0	0	0	0	0	0	0	0	0	0	0	0	0	0	0	0	0	0	0	0	0	0	0	0	0	0	0	0	0	1	0	0	1	0	0
MG: Chemotaxis response regulator protein-glutamate methylesterase 1 OS=Methanospirillum hungatei JF-1 (strain ATCC 27890 / DSM 864 / NBRC 100397 / JF-1) GN=cheB1 PE=3 SV=1 [Q2FMT2] Score: 406.0	K03412	3.1.1.61	Archaea	Unknown	Euryarchaeota	Methanomicrobia	Methanomicrobiales	Methanospirillaceae	Methanospirillum	Methanospirillum hungatei	-	0	0	0	0	0	0	0	0	0	0	0	0	0	0	0	0	0	0	0	0	0	0	0	0	0	0	0	0	0	0	0	0	0	1	0	0	0	0
MG: Acetylglutamate kinase OS=Methanoculleus marisnigri (strain ATCC 35101 / DSM 1498 / JR1) GN=argB PE=3 SV=1 [A3CRT9] Score: 353.0	K00930	2.7.2.8	Archaea	Unknown	Euryarchaeota	Methanomicrobia	Methanomicrobiales	Unknown	Unknown	Unknown	-	4	1	0	0	0	0	0	0	0	0	0	0	2	2	3	3	0	0	0	0	0	0	0	0	0	0	0	0	0	0	0	0	0	0	0	0	0	0
MG: 30S ribosomal protein S3 OS=Methanoculleus marisnigri (strain ATCC 35101 / DSM 1498 / JR1) GN=rps3 PE=3 SV=1 [A3CT03] Score: 398.0	K02982	-	Archaea	Unknown	Euryarchaeota	Methanomicrobia	Methanomicrobiales	Unknown	Unknown	Unknown	-	1	0	0	0	1	0	0	0	0	0	0	0	0	0	0	0	0	0	0	0	0	0	0	0	1	1	2	1	0	0	0	0	0	0	0	0	0	0
MG: Aspartate carbamoyltransferase OS=Methanoculleus marisnigri (strain ATCC 35101 / DSM 1498 / JR1) GN=pyrB PE=3 SV=1 [A3CW66] Score: 559.0	K00609	2.1.3.2	Archaea	Unknown	Euryarchaeota	Methanomicrobia	Methanomicrobiales	Unknown	Unknown	Unknown	-	0	0	0	0	0	1	0	0	0	0	0	0	0	0	0	0	0	0	0	0	0	0	0	0	1	0	0	0	0	0	0	0	0	0	0	0	0	0
Y1593_METB6 UPF0200 protein Mboo_1593 OS=Methanoregula boonei (strain 6A8) GN=Mboo_1593 PE=3 SV=1	-	-	Archaea	Unknown	Euryarchaeota	Methanomicrobia	Methanomicrobiales	Unknown	Unknown	Unknown	-	0	0	0	0	0	0	0	0	1	0	0	0	0	0	0	0	0	0	0	0	0	0	0	0	0	0	0	0	0	0	0	0	0	0	0	0	0	0
MG: ORC1-type DNA replication protein OS=Methanoculleus marisnigri (strain ATCC 35101 / DSM 1498 / JR1) GN=cdc6 PE=3 SV=1 [A3CRD6] Score: 423.0	K10725	-	Archaea	Unknown	Euryarchaeota	Methanomicrobia	Methanomicrobiales	Unknown	Unknown	Unknown	-	0	0	0	0	0	0	0	0	0	0	0	0	0	0	1	0	0	0	0	1	0	0	0	0	2	0	0	0	0	0	0	0	0	0	0	0	0	0
MG: Histidine--tRNA ligase OS=Methanoculleus marisnigri (strain ATCC 35101 / DSM 1498 / JR1) GN=hisS PE=3 SV=1 [A3CVW4] Score: 677.0	K01892	6.1.1.21	Archaea	Unknown	Euryarchaeota	Methanomicrobia	Methanomicrobiales	Unknown	Unknown	Unknown	-	0	0	0	0	0	0	0	0	0	0	0	0	0	0	0	0	0	1	0	0	0	0	0	0	0	0	0	0	4	0	3	2	2	2	1	0	0	1
Y3016_METHJ DNA-binding protein Mhun_3016 OS=Methanospirillum hungatei JF-1 (strain ATCC 27890 / DSM 864 / NBRC 100397 / JF-1) GN=Mhun_3016 PE=3 SV=1	K06875	-	Archaea	Unknown	Euryarchaeota	Methanomicrobia	Methanomicrobiales	Unknown	Unknown	Unknown	-	0	0	0	0	0	0	0	0	0	0	0	0	0	0	0	0	0	0	0	0	0	0	0	0	0	4	2	2	0	0	0	0	0	0	0	0	0	0
MG: DNA ligase OS=Methanoculleus marisnigri (strain ATCC 35101 / DSM 1498 / JR1) GN=lig PE=3 SV=1 [A3CWP1] Score: 466.0	K10747	6.5.1.1	Archaea	Unknown	Euryarchaeota	Methanomicrobia	Methanomicrobiales	Unknown	Unknown	Unknown	-	0	0	0	0	0	0	0	0	0	0	0	0	0	0	0	0	0	0	0	0	0	0	0	0	0	0	0	0	1	0	0	1	0	0	0	0	0	0
RL31_METLZ 50S ribosomal protein L31e OS=Methanocorpusculum labreanum (strain ATCC 43576 / DSM 4855 / Z) GN=rpl31e PE=3 SV=1	K02910	-	Archaea	Unknown	Euryarchaeota	Methanomicrobia	Methanomicrobiales	Unknown	Unknown	Unknown	-	2	0	0	0	2	0	0	0	0	0	0	0	0	0	0	0	0	0	0	0	0	0	0	0	1	0	0	0	0	0	0	0	0	0	0	0	0	0
RL31_METMJ 50S ribosomal protein L31e OS=Methanoculleus marisnigri (strain ATCC 35101 / DSM 1498 / JR1) GN=rpl31e PE=3 SV=1	K02910	-	Archaea	Unknown	Euryarchaeota	Methanomicrobia	Methanomicrobiales	Unknown	Unknown	Unknown	-	2	0	0	0	2	0	0	0	0	0	0	0	0	0	0	0	0	0	0	0	0	0	0	0	1	0	0	0	0	0	0	0	0	0	0	0	0	0
MG: Phosphomethylpyrimidine synthase OS=Methanoculleus marisnigri (strain ATCC 35101 / DSM 1498 / JR1) GN=thiC PE=3 SV=1 [A3CVT7] Score: 825.0	K03147	4.1.99.17	Archaea	Unknown	Euryarchaeota	Methanomicrobia	Methanomicrobiales	Unknown	Unknown	Unknown	-	0	0	0	0	6	6	4	5	39	46	26	24	0	0	0	0	0	0	0	0	0	0	0	0	0	0	0	0	0	0	0	0	0	0	0	0	0	0
MG: Phosphoribosyl-ATP pyrophosphatase OS=Methanoculleus marisnigri (strain ATCC 35101 / DSM 1498 / JR1) GN=hisE PE=3 SV=1 [A3CWF5] Score: 182.0	K01523	3.6.1.31	Archaea	Unknown	Euryarchaeota	Methanomicrobia	Methanomicrobiales	Unknown	Unknown	Unknown	-	0	0	0	0	0	0	1	0	2	0	0	0	2	0	4	2	3	2	0	0	0	0	0	0	0	0	0	0	0	0	0	0	0	0	0	0	0	0
RFCS_METB6 Replication factor C small subunit OS=Methanoregula boonei (strain 6A8) GN=rfcS PE=3 SV=1	K04801	-	Archaea	Unknown	Euryarchaeota	Methanomicrobia	Methanomicrobiales	Unknown	Unknown	Unknown	-	0	0	0	0	0	0	0	0	0	0	0	0	0	0	2	0	0	0	0	0	0	0	0	0	1	0	0	0	0	0	0	0	0	0	0	0	0	0
MG: DNA-binding protein Memar_1972 OS=Methanoculleus marisnigri (strain ATCC 35101 / DSM 1498 / JR1) GN=Memar_1972 PE=3 SV=1 [A3CWZ8] Score: 165.0	K06875	-	Archaea	Unknown	Euryarchaeota	Methanomicrobia	Methanomicrobiales	Unknown	Unknown	Unknown	-	0	0	0	0	0	0	0	0	0	0	0	0	0	0	0	0	0	0	0	0	0	0	0	0	0	4	2	2	0	0	0	0	0	0	0	0	0	0
MG: Glutamyl-tRNA reductase OS=Methanoculleus marisnigri (strain ATCC 35101 / DSM 1498 / JR1) GN=hemA PE=3 SV=1 [A3CU63] Score: 727.0	K02492	1.2.1.70	Archaea	Unknown	Euryarchaeota	Methanomicrobia	Methanomicrobiales	Unknown	Unknown	Unknown	-	0	0	0	0	0	0	0	0	0	0	0	0	0	0	0	0	0	0	0	0	0	0	0	0	0	0	0	0	0	0	0	0	0	0	0	0	0	0
ACDE_METCN Acetyl-CoA decarbonylase/synthase complex subunit epsilon OS=Methanosaeta concilii GN=cdhB PE=1 SV=1	-	-	Archaea	Unknown	Euryarchaeota	Methanomicrobia	Methanosarcinales	Methanosaetaceae	Methanosaeta	Methanosaeta concilii	-	0	0	0	0	8	10	0	0	0	0	0	0	0	0	0	0	0	0	0	0	62	89	73	66	0	0	0	0	0	0	0	0	0	0	0	0	0	0
HMC1C_METCN Chromosomal protein MC1c OS=Methanosaeta concilii PE=1 SV=1	-	-	Archaea	Unknown	Euryarchaeota	Methanomicrobia	Methanosarcinales	Methanosaetaceae	Methanosaeta	Methanosaeta concilii	-	0	0	0	0	0	0	0	0	0	0	0	0	0	0	0	0	0	0	0	0	0	0	0	0	0	0	0	0	0	0	0	0	0	0	0	0	0	0
MG: Methanogenesis regulatory protein FilR1 OS=Methanosaeta harundinacea (strain 6Ac) GN=filR1 PE=1 SV=1 [G7WMP6] Score: 97.8	-	-	Archaea	Unknown	Euryarchaeota	Methanomicrobia	Methanosarcinales	Methanosaetaceae	Methanosaeta	Methanosaeta harundinacea	-	0	0	0	0	13	11	14	10	13	13	9	5	0	0	0	0	0	0	0	0	0	0	0	0	0	0	0	0	0	0	0	0	1	2	1	0	0	0
MG: UPF0272 protein Mthe_1127 OS=Methanosaeta thermophila (strain DSM 6194 / PT) GN=Mthe_1127 PE=3 SV=1 [A0B886] Score: 55.1	K09121	-	Archaea	Unknown	Euryarchaeota	Methanomicrobia	Methanosarcinales	Methanosaetaceae	Methanosaeta	Methanosaeta thermophila	-	0	0	0	0	0	0	0	2	0	0	0	0	0	0	0	0	0	0	0	0	0	0	0	0	0	0	0	0	0	0	0	0	2	0	4	5	0	0
PPAC_METTP Manganese-dependent inorganic pyrophosphatase OS=Methanosaeta thermophila (strain DSM 6194 / PT) GN=ppaC PE=1 SV=1	K15986	3.6.1.1	Archaea	Unknown	Euryarchaeota	Methanomicrobia	Methanosarcinales	Methanosaetaceae	Methanosaeta	Methanosaeta thermophila	-	0	0	0	0	0	0	0	0	0	0	0	0	0	0	0	0	0	0	0	0	12	14	15	11	0	0	0	0	0	0	0	0	0	0	0	0	0	0
ADEC_METTP Adenine deaminase OS=Methanosaeta thermophila (strain DSM 6194 / JCM 14653 / NBRC 101360 / PT) GN=ade PE=3 SV=1	K01486	3.5.4.2	Archaea	Unknown	Euryarchaeota	Methanomicrobia	Methanosarcinales	Methanosaetaceae	Methanosaeta	Methanosaeta thermophila	-	0	0	0	0	0	0	0	0	0	0	0	0	0	0	0	0	0	0	0	0	0	0	1	0	0	0	0	0	0	0	0	0	0	0	0	0	0	0
FLPA_METTP Fibrillarin-like rRNA/tRNA 2'-O-methyltransferase OS=Methanosaeta thermophila (strain DSM 6194 / JCM 14653 / NBRC 101360 / PT) GN=flpA PE=3 SV=1	K04795	2.1.1.-	Archaea	Unknown	Euryarchaeota	Methanomicrobia	Methanosarcinales	Methanosaetaceae	Methanosaeta	Methanosaeta thermophila	-	0	0	0	0	0	0	0	0	0	0	0	0	0	0	0	0	0	0	0	0	0	0	0	0	0	0	0	0	0	0	0	0	0	0	1	0	0	0
MG: 2,3-bisphosphoglycerate-independent phosphoglycerate mutase OS=Methanosaeta thermophila (strain DSM 6194 / PT) GN=apgM PE=3 SV=1 [A0B6L2] Score: 435.0	K15635	5.4.2.12	Archaea	Unknown	Euryarchaeota	Methanomicrobia	Methanosarcinales	Methanosaetaceae	Methanosaeta	Methanosaeta thermophila	-	0	0	0	0	0	0	0	0	0	0	0	0	0	0	0	0	0	0	0	0	0	0	0	0	0	0	0	0	0	0	0	0	0	0	0	0	0	0
MG: N-(5'-phosphoribosyl)anthranilate isomerase OS=Methanosaeta thermophila (strain DSM 6194 / PT) GN=trpF PE=3 SV=1 [A0B9D8] Score: 148.0	K01817	5.3.1.24	Archaea	Unknown	Euryarchaeota	Methanomicrobia	Methanosarcinales	Methanosaetaceae	Methanosaeta	Methanosaeta thermophila	-	0	0	0	0	0	0	0	0	0	0	0	0	0	0	0	0	0	0	0	0	0	0	0	0	0	0	0	0	0	0	0	0	0	0	0	0	0	0
PURL_METTP Phosphoribosylformylglycinamidine synthase subunit PurL OS=Methanosaeta thermophila (strain DSM 6194 / JCM 14653 / NBRC 101360 / PT) GN=purL PE=3 SV=1	K01952	6.3.5.3	Archaea	Unknown	Euryarchaeota	Methanomicrobia	Methanosarcinales	Methanosaetaceae	Methanosaeta	Methanosaeta thermophila	-	0	0	0	0	0	0	0	0	0	0	0	0	0	0	0	0	0	0	0	0	0	0	0	0	0	0	0	0	0	0	0	0	0	0	0	0	0	0
VATE_METTP V-type ATP synthase subunit E OS=Methanosaeta thermophila (strain DSM 6194 / PT) GN=atpE PE=3 SV=1	K02121	-	Archaea	Unknown	Euryarchaeota	Methanomicrobia	Methanosarcinales	Methanosaetaceae	Methanosaeta	Methanosaeta thermophila	-	0	0	0	0	0	0	0	0	0	0	0	0	0	0	0	0	0	0	0	0	0	0	0	0	0	0	0	0	0	0	0	0	0	0	0	0	0	0
ALBA_METTP DNA/RNA-binding protein Alba OS=Methanosaeta thermophila (strain DSM 6194 / PT) GN=albA PE=3 SV=1	K03622	-	Archaea	Unknown	Euryarchaeota	Methanomicrobia	Methanosarcinales	Methanosaetaceae	Methanosaeta	Methanosaeta thermophila	-	0	0	0	0	0	0	0	0	0	0	0	0	0	0	0	0	0	0	0	0	0	0	0	0	0	0	0	0	0	0	0	0	0	0	0	0	0	0
MG: UPF0272 protein Mbur_2265 OS=Methanococcoides burtonii (strain DSM 6242 / NBRC 107633 / OCM 468 / ACE-M) GN=Mbur_2265 PE=3 SV=1 [Q12TV0] Score: 294.0	K09121	-	Archaea	Unknown	Euryarchaeota	Methanomicrobia	Methanosarcinales	Methanosarcinaceae	Methanococcoides	Methanococcoides burtonii	-	0	0	0	0	0	0	0	0	0	0	0	0	1	0	0	0	0	0	0	0	0	0	0	0	0	0	0	0	0	0	0	0	0	0	0	0	0	0
Y1033_METBU UPF0179 protein Mbur_1033 OS=Methanococcoides burtonii (strain DSM 6242 / NBRC 107633 / OCM 468 / ACE-M) GN=Mbur_1033 PE=3 SV=1	K09730	-	Archaea	Unknown	Euryarchaeota	Methanomicrobia	Methanosarcinales	Methanosarcinaceae	Methanococcoides	Methanococcoides burtonii	-	0	0	0	0	0	0	0	0	0	0	0	0	0	0	0	0	0	0	1	0	0	0	0	0	0	0	0	0	0	0	0	0	0	0	0	0	0	0
MG: Type 2 DNA topoisomerase 6 subunit B OS=Methanococcoides burtonii (strain DSM 6242 / NBRC 107633 / OCM 468 / ACE-M) GN=top6B PE=3 SV=1 [Q12WQ0] Score: 544.0	K03167	5.99.1.3	Archaea	Unknown	Euryarchaeota	Methanomicrobia	Methanosarcinales	Methanosarcinaceae	Methanococcoides	Methanococcoides burtonii	-	0	0	0	0	0	0	0	0	0	0	0	0	0	0	0	0	0	0	0	1	0	0	0	0	0	0	0	0	0	0	0	0	0	0	0	0	0	0
RPOH_METBU DNA-directed RNA polymerase subunit H OS=Methanococcoides burtonii (strain DSM 6242 / NBRC 107633 / OCM 468 / ACE-M) GN=rpoH PE=3 SV=1	K03053	2.7.7.6	Archaea	Unknown	Euryarchaeota	Methanomicrobia	Methanosarcinales	Methanosarcinaceae	Methanococcoides	Methanococcoides burtonii	-	0	0	0	0	0	0	0	0	0	0	0	0	0	0	0	0	0	0	0	0	0	1	0	0	0	0	0	0	0	0	0	0	0	0	0	0	0	0
MG: UvrABC system protein C OS=Methanococcoides burtonii (strain DSM 6242 / NBRC 107633 / OCM 468 / ACE-M) GN=uvrC PE=3 SV=1 [Q12W02] Score: 186.0	K03703	-	Archaea	Unknown	Euryarchaeota	Methanomicrobia	Methanosarcinales	Methanosarcinaceae	Methanococcoides	Methanococcoides burtonii	-	0	0	0	0	0	0	0	0	0	0	0	0	0	0	0	0	0	0	0	0	0	0	0	0	0	0	0	0	0	0	0	0	0	0	0	0	0	0
MG: Putative homocitrate synthase AksA OS=Methanosarcina acetivorans (strain ATCC 35395 / DSM 2834 / JCM 12185 / C2A) GN=aksA PE=3 SV=1 [Q8TKQ6] Score: 400.0	K10977	2.3.3.14|2.3.3.-|2.3.3.-	Archaea	Unknown	Euryarchaeota	Methanomicrobia	Methanosarcinales	Methanosarcinaceae	Methanosarcina	Methanosarcina acetivorans	-	1	0	0	0	0	0	0	0	0	0	0	0	0	0	0	0	0	0	0	0	0	0	0	0	0	0	0	0	0	0	0	0	0	0	0	0	0	0
MG: 30S ribosomal protein S17e OS=Methanosarcina acetivorans (strain ATCC 35395 / DSM 2834 / JCM 12185 / C2A) GN=rps17e PE=3 SV=1 [Q8THP2] Score: 121.0	K02962	-	Archaea	Unknown	Euryarchaeota	Methanomicrobia	Methanosarcinales	Methanosarcinaceae	Methanosarcina	Methanosarcina acetivorans	-	0	0	0	0	4	4	3	2	0	0	0	0	0	0	0	0	0	0	0	0	0	0	0	0	0	0	0	0	0	0	0	0	0	0	0	0	0	0
MG: Exosome complex component Rrp42 OS=Methanosarcina acetivorans (strain ATCC 35395 / DSM 2834 / JCM 12185 / C2A) GN=rrp42 PE=3 SV=1 [Q8TGX5] Score: 486.0	K12589	-	Archaea	Unknown	Euryarchaeota	Methanomicrobia	Methanosarcinales	Methanosarcinaceae	Methanosarcina	Methanosarcina acetivorans	-	0	0	0	0	13	8	11	9	3	2	0	0	0	0	0	0	0	0	0	0	0	0	0	0	0	0	0	0	0	0	0	0	0	0	0	0	0	0
MG: Peptide methionine sulfoxide reductase MsrA OS=Methanosarcina acetivorans (strain ATCC 35395 / DSM 2834 / JCM 12185 / C2A) GN=msrA PE=3 SV=1 [Q8TQV6] Score: 326.0	K07304	1.8.4.11	Archaea	Unknown	Euryarchaeota	Methanomicrobia	Methanosarcinales	Methanosarcinaceae	Methanosarcina	Methanosarcina acetivorans	-	0	0	0	0	4	3	0	0	1	1	2	0	2	0	0	0	0	0	0	0	0	0	0	0	0	0	0	0	0	0	0	0	0	0	0	0	0	0
MG: Probable cobalt-precorrin-6B C(15)-methyltransferase (decarboxylating) OS=Methanosarcina acetivorans (strain ATCC 35395 / DSM 2834 / JCM 12185 / C2A) GN=cbiT PE=3 SV=1 [Q8TI93] Score: 316.0	K02191	2.1.1.196	Archaea	Unknown	Euryarchaeota	Methanomicrobia	Methanosarcinales	Methanosarcinaceae	Methanosarcina	Methanosarcina acetivorans	-	0	0	0	0	3	1	3	1	0	2	0	0	0	0	0	0	0	0	0	0	0	0	0	0	0	0	0	0	0	0	0	0	0	0	0	0	0	0
MG: Methyl sulfide methyltransferase-associated sensor OS=Methanosarcina acetivorans (strain ATCC 35395 / DSM 2834 / JCM 12185 / C2A) GN=msmS PE=1 SV=1 [Q8THF6] Score: 155.0	-	2.7.13.3	Archaea	Unknown	Euryarchaeota	Methanomicrobia	Methanosarcinales	Methanosarcinaceae	Methanosarcina	Methanosarcina acetivorans	-	0	0	0	0	1	0	0	0	3	10	1	0	0	0	0	0	0	0	0	0	0	0	0	0	0	0	0	0	1	0	0	0	0	0	0	0	0	0
MG: Translation initiation factor 2 subunit beta OS=Methanosarcina acetivorans (strain ATCC 35395 / DSM 2834 / JCM 12185 / C2A) GN=eif2b PE=3 SV=1 [Q8TU91] Score: 405.0	K03238	-	Archaea	Unknown	Euryarchaeota	Methanomicrobia	Methanosarcinales	Methanosarcinaceae	Methanosarcina	Methanosarcina acetivorans	-	0	0	0	0	0	1	1	0	0	0	0	0	0	0	0	0	0	0	0	0	0	0	0	0	0	0	0	0	0	0	0	0	0	0	0	0	0	0
MG: 50S ribosomal protein L31e OS=Methanosarcina acetivorans (strain ATCC 35395 / DSM 2834 / JCM 12185 / C2A) GN=rpl31e PE=3 SV=1 [Q8TIN3] Score: 166.0	K02910	-	Archaea	Unknown	Euryarchaeota	Methanomicrobia	Methanosarcinales	Methanosarcinaceae	Methanosarcina	Methanosarcina acetivorans	-	0	0	0	0	0	0	1	2	0	0	0	0	0	0	0	0	0	0	0	0	0	0	0	0	0	0	0	0	0	0	0	0	0	0	0	0	0	0
MG: Carbon monoxide dehydrogenase 2 OS=Methanosarcina acetivorans (strain ATCC 35395 / DSM 2834 / JCM 12185 / C2A) GN=cooS2 PE=3 SV=1 [Q8TR73] Score: 230.0	K00198	1.2.7.4	Archaea	Unknown	Euryarchaeota	Methanomicrobia	Methanosarcinales	Methanosarcinaceae	Methanosarcina	Methanosarcina acetivorans	-	0	0	0	0	0	0	1	0	0	0	0	0	0	0	0	0	0	0	0	0	0	0	0	0	0	0	0	0	0	0	0	0	0	0	0	0	0	0
FTSY_METAC Signal recognition particle receptor FtsY OS=Methanosarcina acetivorans (strain ATCC 35395 / DSM 2834 / JCM 12185 / C2A) GN=ftsY PE=3 SV=1	K03110	-	Archaea	Unknown	Euryarchaeota	Methanomicrobia	Methanosarcinales	Methanosarcinaceae	Methanosarcina	Methanosarcina acetivorans	-	0	0	0	0	0	0	1	0	0	0	0	0	0	0	0	0	0	0	0	0	0	0	0	0	0	0	0	0	0	0	0	0	0	0	0	0	0	0
PELO_METAC Protein pelota homolog OS=Methanosarcina acetivorans (strain ATCC 35395 / DSM 2834 / JCM 12185 / C2A) GN=pelA PE=3 SV=1	K06965	3.1.-.-	Archaea	Unknown	Euryarchaeota	Methanomicrobia	Methanosarcinales	Methanosarcinaceae	Methanosarcina	Methanosarcina acetivorans	-	0	0	0	0	0	0	2	1	2	0	0	0	0	0	0	0	0	0	0	0	0	0	0	0	0	0	0	0	0	0	0	0	1	0	1	0	1	0
MG: UPF0235 protein MA_4097 OS=Methanosarcina acetivorans (strain ATCC 35395 / DSM 2834 / JCM 12185 / C2A) GN=MA_4097 PE=3 SV=2 [Q8TIP5] Score: 81.6	K09131	-	Archaea	Unknown	Euryarchaeota	Methanomicrobia	Methanosarcinales	Methanosarcinaceae	Methanosarcina	Methanosarcina acetivorans	-	0	0	0	0	0	0	0	0	0	1	0	0	0	0	0	0	2	4	0	1	0	0	0	0	0	0	0	0	0	0	0	0	0	0	0	0	0	0
MG: UPF0339 protein MA_3316 OS=Methanosarcina acetivorans (strain ATCC 35395 / DSM 2834 / JCM 12185 / C2A) GN=MA_3316 PE=3 SV=2 [Q8TKT0] Score: 44.7	K09946	-	Archaea	Unknown	Euryarchaeota	Methanomicrobia	Methanosarcinales	Methanosarcinaceae	Methanosarcina	Methanosarcina acetivorans	-	0	0	0	0	0	0	0	0	0	0	1	0	0	0	0	0	0	0	0	0	0	0	0	0	0	0	0	0	0	0	0	0	0	0	0	0	0	0
MG: UPF0331 protein MA_0101 OS=Methanosarcina acetivorans (strain ATCC 35395 / DSM 2834 / JCM 12185 / C2A) GN=MA_0101 PE=3 SV=1 [Q8TUG6] Score: 103.0	-	-	Archaea	Unknown	Euryarchaeota	Methanomicrobia	Methanosarcinales	Methanosarcinaceae	Methanosarcina	Methanosarcina acetivorans	-	0	0	0	0	0	0	0	0	0	0	0	0	0	0	0	0	1	0	0	0	0	0	0	0	0	0	0	0	0	0	0	0	0	0	0	0	0	0
MG: Methylated-DNA--protein-cysteine methyltransferase OS=Methanosarcina acetivorans (strain ATCC 35395 / DSM 2834 / JCM 12185 / C2A) GN=ogt PE=3 SV=1 [Q8TI34] Score: 105.0	K00567	2.1.1.63	Archaea	Unknown	Euryarchaeota	Methanomicrobia	Methanosarcinales	Methanosarcinaceae	Methanosarcina	Methanosarcina acetivorans	-	0	0	0	0	0	0	0	0	0	0	0	0	0	0	0	0	2	0	0	1	0	0	0	0	0	0	0	0	0	0	0	0	0	0	0	0	0	0
Y511_METAC UPF0228 protein MA_0511 OS=Methanosarcina acetivorans (strain ATCC 35395 / DSM 2834 / JCM 12185 / C2A) GN=MA_0511 PE=3 SV=1	-	-	Archaea	Unknown	Euryarchaeota	Methanomicrobia	Methanosarcinales	Methanosarcinaceae	Methanosarcina	Methanosarcina acetivorans	-	0	0	0	0	0	0	0	0	0	0	0	0	0	0	0	0	0	1	0	0	0	0	0	0	0	0	0	0	0	0	0	0	0	0	0	0	0	0
MG: 3-methylornithyl-N6-L-lysine dehydrogenase OS=Methanosarcina acetivorans (strain ATCC 35395 / DSM 2834 / JCM 12185 / C2A) GN=pylD PE=1 SV=1 [Q8TUC1] Score: 115.0	K16182	1.4.1.-	Archaea	Unknown	Euryarchaeota	Methanomicrobia	Methanosarcinales	Methanosarcinaceae	Methanosarcina	Methanosarcina acetivorans	-	0	0	0	0	0	0	0	0	0	0	0	0	0	0	0	0	0	0	0	0	2	1	0	0	0	0	0	0	0	0	0	0	0	0	0	0	0	0
MG: Tryptophan--tRNA ligase OS=Methanosarcina acetivorans (strain ATCC 35395 / DSM 2834 / JCM 12185 / C2A) GN=trpS PE=3 SV=1 [Q8TUA1] Score: 410.0	K01867	6.1.1.2	Archaea	Unknown	Euryarchaeota	Methanomicrobia	Methanosarcinales	Methanosarcinaceae	Methanosarcina	Methanosarcina acetivorans	-	0	0	0	0	0	0	0	0	0	0	0	0	0	0	0	0	0	0	0	0	0	0	0	0	0	0	0	1	0	0	0	0	0	0	0	0	0	0
MG: Probable porphobilinogen deaminase OS=Methanosarcina acetivorans (strain ATCC 35395 / DSM 2834 / JCM 12185 / C2A) GN=hemC PE=3 SV=1 [Q8TT56] Score: 270.0	K01749	2.5.1.61	Archaea	Unknown	Euryarchaeota	Methanomicrobia	Methanosarcinales	Methanosarcinaceae	Methanosarcina	Methanosarcina acetivorans	-	0	0	0	0	0	0	0	0	0	0	0	0	0	0	0	0	0	0	0	0	0	0	0	0	0	0	0	0	0	3	4	3	0	0	0	0	4	2
SYT_METAC Threonine--tRNA ligase OS=Methanosarcina acetivorans (strain ATCC 35395 / DSM 2834 / JCM 12185 / C2A) GN=thrS PE=3 SV=1	K01868	6.1.1.3	Archaea	Unknown	Euryarchaeota	Methanomicrobia	Methanosarcinales	Methanosarcinaceae	Methanosarcina	Methanosarcina acetivorans	-	0	0	0	0	0	0	0	0	0	0	0	0	0	0	0	0	0	0	0	0	0	0	0	0	0	0	0	0	0	0	0	0	0	0	0	1	0	0
MG: Tetrahydromethanopterin:alpha-L-glutamate ligase OS=Methanosarcina acetivorans (strain ATCC 35395 / DSM 2834 / JCM 12185 / C2A) GN=mptN PE=3 SV=1 [Q8TKX5] Score: 139.0	K15740	6.3.2.33	Archaea	Unknown	Euryarchaeota	Methanomicrobia	Methanosarcinales	Methanosarcinaceae	Methanosarcina	Methanosarcina acetivorans	-	0	0	0	0	0	0	0	0	0	0	0	0	0	0	0	0	0	0	0	0	0	0	0	0	0	0	0	0	0	0	0	0	0	0	0	0	0	1
ALAXM_METAC Alanyl-tRNA editing protein AlaX-M OS=Methanosarcina acetivorans (strain ATCC 35395 / DSM 2834 / JCM 12185 / C2A) GN=alaXM PE=3 SV=1	K07050	-	Archaea	Unknown	Euryarchaeota	Methanomicrobia	Methanosarcinales	Methanosarcinaceae	Methanosarcina	Methanosarcina acetivorans	-	0	0	0	0	0	0	0	0	0	0	0	0	0	0	0	0	0	0	0	0	0	0	0	0	0	0	0	0	0	0	0	0	0	0	0	0	0	0
MG: Sodium/calcium exchanger MaX1 OS=Methanosarcina acetivorans (strain ATCC 35395 / DSM 2834 / JCM 12185 / C2A) GN=maX1 PE=1 SV=1 [Q8TPA6] Score: 85.1	K07301	-	Archaea	Unknown	Euryarchaeota	Methanomicrobia	Methanosarcinales	Methanosarcinaceae	Methanosarcina	Methanosarcina acetivorans	-	0	0	0	0	0	0	0	0	0	0	0	0	0	0	0	0	0	0	0	0	0	0	0	0	0	0	0	0	0	0	0	0	0	0	0	0	0	0
CRCB1_METAC Putative fluoride ion transporter CrcB 1 OS=Methanosarcina acetivorans (strain ATCC 35395 / DSM 2834 / JCM 12185 / C2A) GN=crcB1 PE=3 SV=1	K06199	-	Archaea	Unknown	Euryarchaeota	Methanomicrobia	Methanosarcinales	Methanosarcinaceae	Methanosarcina	Methanosarcina acetivorans	-	0	0	0	0	0	0	0	0	0	0	0	0	0	0	0	0	0	0	0	0	0	0	0	0	0	0	0	0	0	0	0	0	0	0	0	0	0	0
MG: Coenzyme F420 hydrogenase subunit beta OS=Methanosarcina barkeri (strain Fusaro / DSM 804) GN=frhB PE=1 SV=2 [P80490] Score: 402.0	K00441	1.12.98.1	Archaea	Unknown	Euryarchaeota	Methanomicrobia	Methanosarcinales	Methanosarcinaceae	Methanosarcina	Methanosarcina barkeri	-	160	123	92	70	133	137	123	127	64	44	66	55	32	41	36	20	20	40	30	30	39	43	37	32	81	89	159	92	31	23	19	20	45	32	50	53	56	38
MG: Methanol--corrinoid protein co-methyltransferase OS=Methanosarcina barkeri (strain Fusaro / DSM 804) GN=mtaB PE=1 SV=1 [Q46EH3] Score: 760.0	K04480	2.1.1.90	Archaea	Unknown	Euryarchaeota	Methanomicrobia	Methanosarcinales	Methanosarcinaceae	Methanosarcina	Methanosarcina barkeri	-	19	11	1	24	79	73	305	260	292	337	58	85	0	0	0	0	0	0	0	1	11	10	3	12	0	0	0	0	0	0	0	0	5	6	12	7	5	15
MG: Coenzyme F420 hydrogenase subunit gamma OS=Methanosarcina barkeri (strain Fusaro / DSM 804) GN=frhG PE=1 SV=3 [P80491] Score: 298.0	K00443	1.12.98.1	Archaea	Unknown	Euryarchaeota	Methanomicrobia	Methanosarcinales	Methanosarcinaceae	Methanosarcina	Methanosarcina barkeri	-	89	72	34	11	189	157	240	201	116	106	55	65	55	46	72	57	64	84	71	80	71	65	59	46	140	129	164	100	105	85	52	65	86	83	131	92	77	53
MG: Methylcobamide:CoM methyltransferase MtaA OS=Methanosarcina barkeri GN=mtaA PE=1 SV=1 [Q48927] Score: 51.6	-	2.1.1.246	Archaea	Unknown	Euryarchaeota	Methanomicrobia	Methanosarcinales	Methanosarcinaceae	Methanosarcina	Methanosarcina barkeri	-	0	1	0	0	8	20	95	63	39	29	3	2	6	3	6	11	4	8	3	11	4	2	14	23	0	1	3	1	0	0	1	1	1	1	10	3	0	1
MG: 50S ribosomal protein L24P OS=Methanosarcina barkeri (strain Fusaro / DSM 804) GN=rpl24p PE=3 SV=1 [Q46GA6] Score: 220.0	K02895	-	Archaea	Unknown	Euryarchaeota	Methanomicrobia	Methanosarcinales	Methanosarcinaceae	Methanosarcina	Methanosarcina barkeri	-	0	0	0	0	5	3	2	1	0	0	0	0	0	0	0	0	0	0	0	0	0	0	0	0	0	0	0	0	0	0	0	0	0	0	0	0	0	0
MG: tRNA pseudouridine synthase A OS=Methanosarcina barkeri (strain Fusaro / DSM 804) GN=truA PE=3 SV=1 [Q46CU8] Score: 503.0	K06173	5.4.99.12	Archaea	Unknown	Euryarchaeota	Methanomicrobia	Methanosarcinales	Methanosarcinaceae	Methanosarcina	Methanosarcina barkeri	-	0	0	0	0	1	0	1	0	0	0	0	0	0	0	0	0	0	0	0	0	0	0	0	0	0	0	0	0	0	0	0	0	0	0	0	0	0	0
MG: UPF0200 protein Mbar_A0975 OS=Methanosarcina barkeri (strain Fusaro / DSM 804) GN=Mbar_A0975 PE=3 SV=1 [Q46DU5] Score: 332.0	-	-	Archaea	Unknown	Euryarchaeota	Methanomicrobia	Methanosarcinales	Methanosarcinaceae	Methanosarcina	Methanosarcina barkeri	-	0	0	0	0	2	0	8	4	1	1	0	0	0	0	0	0	0	0	0	0	0	0	0	0	0	0	0	0	0	0	0	0	0	0	0	0	0	0
MG: Methylated-DNA--protein-cysteine methyltransferase OS=Methanosarcina barkeri (strain Fusaro / DSM 804) GN=ogt PE=3 SV=1 [Q46EW4] Score: 281.0	K00567	2.1.1.63	Archaea	Unknown	Euryarchaeota	Methanomicrobia	Methanosarcinales	Methanosarcinaceae	Methanosarcina	Methanosarcina barkeri	-	0	0	0	0	4	2	0	0	0	0	0	0	0	0	0	0	0	0	0	0	0	1	0	0	7	4	4	5	0	0	0	0	0	0	0	0	0	0
MG: 50S ribosomal protein L30P OS=Methanosarcina barkeri (strain Fusaro / DSM 804) GN=rpl30p PE=3 SV=1 [Q46GB6] Score: 285.0	K02907	-	Archaea	Unknown	Euryarchaeota	Methanomicrobia	Methanosarcinales	Methanosarcinaceae	Methanosarcina	Methanosarcina barkeri	-	0	0	0	0	1	7	17	7	0	0	0	1	0	0	0	0	0	0	0	0	0	0	0	0	0	0	0	0	0	0	0	0	0	0	0	0	0	0
MG: Prefoldin subunit alpha OS=Methanosarcina barkeri (strain Fusaro / DSM 804) GN=pfdA PE=3 SV=1 [Q46F99] Score: 242.0	K04797	-	Archaea	Unknown	Euryarchaeota	Methanomicrobia	Methanosarcinales	Methanosarcinaceae	Methanosarcina	Methanosarcina barkeri	-	0	0	0	0	1	0	0	3	0	0	0	0	0	0	0	0	0	0	0	0	0	0	0	0	0	0	0	0	0	0	0	0	0	0	0	0	0	0
MG: 50S ribosomal protein L5 OS=Methanosarcina barkeri (strain Fusaro / DSM 804) GN=rpl5 PE=3 SV=1 [Q46GA8] Score: 318.0	K02931	-	Archaea	Unknown	Euryarchaeota	Methanomicrobia	Methanosarcinales	Methanosarcinaceae	Methanosarcina	Methanosarcina barkeri	-	0	0	0	0	16	8	13	12	4	0	0	0	0	0	0	0	0	0	0	0	0	0	0	0	0	0	0	0	0	0	0	0	0	0	0	0	0	0
MG: ATP-dependent DNA helicase Hel308 OS=Methanosarcina barkeri (strain Fusaro / DSM 804) GN=hel308 PE=3 SV=1 [Q465R3] Score: 147.0	K03726	3.6.4.12	Archaea	Unknown	Euryarchaeota	Methanomicrobia	Methanosarcinales	Methanosarcinaceae	Methanosarcina	Methanosarcina barkeri	-	0	0	0	0	1	0	0	0	0	0	0	0	0	0	0	0	0	0	0	0	0	0	0	0	0	0	0	0	0	0	0	0	0	0	0	0	0	0
MG: UPF0173 metal-dependent hydrolase Mbar_A3716 OS=Methanosarcina barkeri (strain Fusaro / DSM 804) GN=Mbar_A3716 PE=3 SV=1 [Q464W3] Score: 399.0	-	-	Archaea	Unknown	Euryarchaeota	Methanomicrobia	Methanosarcinales	Methanosarcinaceae	Methanosarcina	Methanosarcina barkeri	-	0	0	0	0	1	0	1	2	0	0	0	0	0	0	0	0	0	0	0	0	0	0	0	0	0	0	0	0	0	0	0	0	0	0	0	0	0	0
MG: S-adenosyl-L-methionine-dependent uroporphyrinogen III methyltransferase OS=Methanosarcina barkeri (strain Fusaro / DSM 804) GN=Mbar_A1791 PE=1 SV=1 [Q46BL0] Score: 287.0	K02303	2.1.1.107	Archaea	Unknown	Euryarchaeota	Methanomicrobia	Methanosarcinales	Methanosarcinaceae	Methanosarcina	Methanosarcina barkeri	-	0	0	0	0	11	7	2	5	0	0	0	1	0	0	0	0	0	0	0	0	0	0	0	0	0	0	0	0	3	1	1	1	0	0	0	0	0	0
MCRC_METBF Methyl-coenzyme M reductase operon protein C OS=Methanosarcina barkeri (strain Fusaro / DSM 804) GN=mcrC PE=4 SV=1	K03421	-	Archaea	Unknown	Euryarchaeota	Methanomicrobia	Methanosarcinales	Methanosarcinaceae	Methanosarcina	Methanosarcina barkeri	-	0	0	0	0	1	0	5	1	4	1	0	0	0	0	0	0	0	0	0	0	0	0	0	0	0	0	0	0	0	0	0	0	0	0	0	0	0	0
MG: UPF0179 protein Mbar_A0292 OS=Methanosarcina barkeri (strain Fusaro / DSM 804) GN=Mbar_A0292 PE=3 SV=1 [Q46FR6] Score: 287.0	K09730	-	Archaea	Unknown	Euryarchaeota	Methanomicrobia	Methanosarcinales	Methanosarcinaceae	Methanosarcina	Methanosarcina barkeri	-	0	0	0	0	1	0	0	1	0	0	0	0	0	0	0	0	0	0	0	0	0	0	0	0	0	0	0	0	0	0	0	0	0	0	0	0	0	0
MG: DNA-directed RNA polymerase subunit L OS=Methanosarcina barkeri (strain Fusaro / DSM 804) GN=rpoL PE=3 SV=1 [Q46C10] Score: 172.0	K03056	2.7.7.6	Archaea	Unknown	Euryarchaeota	Methanomicrobia	Methanosarcinales	Methanosarcinaceae	Methanosarcina	Methanosarcina barkeri	-	0	0	0	0	0	1	0	1	0	0	0	0	0	0	0	0	0	0	0	0	0	0	0	0	0	0	0	0	0	0	0	0	0	0	0	0	0	0
MG: Methylated-thiol--coenzyme M methyltransferase OS=Methanosarcina barkeri GN=mtsA PE=1 SV=1 [Q48924] Score: 69.3	-	2.1.1.251	Archaea	Unknown	Euryarchaeota	Methanomicrobia	Methanosarcinales	Methanosarcinaceae	Methanosarcina	Methanosarcina barkeri	-	0	0	0	0	0	1	1	0	0	0	0	0	0	0	0	0	0	0	0	0	0	0	0	0	0	0	0	0	0	0	0	0	0	0	0	0	0	0
MG: Putative thymidylate synthase OS=Methanosarcina barkeri (strain Fusaro / DSM 804) GN=thyA PE=3 SV=1 [Q46E28] Score: 414.0	K00560	2.1.1.-	Archaea	Unknown	Euryarchaeota	Methanomicrobia	Methanosarcinales	Methanosarcinaceae	Methanosarcina	Methanosarcina barkeri	-	0	0	0	0	0	0	1	1	0	0	0	0	0	0	0	0	0	0	0	0	0	0	0	0	0	0	0	0	0	0	0	0	0	0	0	0	0	0
MG: Nicotinamide-nucleotide adenylyltransferase OS=Methanosarcina barkeri (strain Fusaro / DSM 804) GN=Mbar_A0256 PE=3 SV=1 [Q46FV2] Score: 336.0	K00952	2.7.7.1	Archaea	Unknown	Euryarchaeota	Methanomicrobia	Methanosarcinales	Methanosarcinaceae	Methanosarcina	Methanosarcina barkeri	-	0	0	0	0	0	0	2	0	0	0	0	0	0	0	0	0	0	0	0	0	0	0	0	0	0	0	0	0	0	0	0	0	0	0	0	0	0	0
MG: Transcription factor E OS=Methanosarcina barkeri (strain Fusaro / DSM 804) GN=tfe PE=3 SV=1 [Q46G12] Score: 315.0	K03136	-	Archaea	Unknown	Euryarchaeota	Methanomicrobia	Methanosarcinales	Methanosarcinaceae	Methanosarcina	Methanosarcina barkeri	-	0	0	0	0	0	0	4	2	0	0	0	0	0	0	0	0	0	0	0	0	0	0	0	0	0	0	0	0	0	0	0	0	0	0	0	0	0	0
MG: Probable chemoreceptor glutamine deamidase CheD OS=Methanosarcina barkeri (strain Fusaro / DSM 804) GN=cheD PE=3 SV=1 [Q46DT9] Score: 171.0	K03411	3.5.1.44	Archaea	Unknown	Euryarchaeota	Methanomicrobia	Methanosarcinales	Methanosarcinaceae	Methanosarcina	Methanosarcina barkeri	-	0	0	0	0	0	0	0	1	0	0	0	0	0	0	0	0	0	0	0	0	0	0	0	0	0	0	0	0	0	0	0	0	0	0	0	0	0	0
MG: Uncharacterized protein Mbar_A1602 OS=Methanosarcina barkeri (strain Fusaro / DSM 804) GN=Mbar_A1602 PE=3 SV=2 [P96800] Score: 152.0	-	-	Archaea	Unknown	Euryarchaeota	Methanomicrobia	Methanosarcinales	Methanosarcinaceae	Methanosarcina	Methanosarcina barkeri	-	0	0	0	0	0	0	0	0	1	0	0	0	0	0	0	0	0	0	0	0	0	0	0	0	0	0	0	0	0	0	0	0	0	0	0	0	0	0
MG: FO synthase subunit 1 OS=Methanosarcina barkeri (strain Fusaro / DSM 804) GN=cofG PE=3 SV=1 [Q466A4] Score: 515.0	K11780	2.5.1.77	Archaea	Unknown	Euryarchaeota	Methanomicrobia	Methanosarcinales	Methanosarcinaceae	Methanosarcina	Methanosarcina barkeri	-	0	0	0	0	0	0	0	0	0	0	1	0	1	0	0	0	0	0	0	0	0	0	0	0	0	0	0	0	0	0	0	0	0	0	0	0	0	0
MG: Phosphoribosylformylglycinamidine synthase subunit PurL OS=Methanosarcina barkeri (strain Fusaro / DSM 804) GN=purL PE=3 SV=1 [Q46F25] Score: 725.0	K01952	6.3.5.3	Archaea	Unknown	Euryarchaeota	Methanomicrobia	Methanosarcinales	Methanosarcinaceae	Methanosarcina	Methanosarcina barkeri	-	0	0	0	0	0	0	0	0	0	0	0	0	3	0	0	0	0	0	0	0	0	0	0	0	0	0	0	0	0	0	0	0	0	0	0	0	0	0
MG: MEMO1 family protein Mbar_A1422 OS=Methanosarcina barkeri (strain Fusaro / DSM 804) GN=Mbar_A1422 PE=3 SV=1 [Q46CL1] Score: 229.0	K06990	-	Archaea	Unknown	Euryarchaeota	Methanomicrobia	Methanosarcinales	Methanosarcinaceae	Methanosarcina	Methanosarcina barkeri	-	0	0	0	0	0	0	0	0	0	0	0	0	0	0	1	0	0	1	0	0	0	0	0	0	0	0	0	0	0	0	0	0	0	0	0	0	0	0
MG: 2,3-bisphosphoglycerate-independent phosphoglycerate mutase OS=Methanosarcina barkeri (strain Fusaro / DSM 804) GN=apgM PE=3 SV=1 [Q46E58] Score: 385.0	K15635	5.4.2.12	Archaea	Unknown	Euryarchaeota	Methanomicrobia	Methanosarcinales	Methanosarcinaceae	Methanosarcina	Methanosarcina barkeri	-	0	0	0	0	0	0	0	0	0	0	0	0	0	0	0	0	0	1	0	0	0	0	0	0	0	0	0	0	0	0	0	0	0	0	0	0	0	0
MG: Putative cobalt transport protein CbiM 2 OS=Methanosarcina barkeri (strain Fusaro / DSM 804) GN=cbiM2 PE=3 SV=1 [Q46AL8] Score: 291.0	K02007	-	Archaea	Unknown	Euryarchaeota	Methanomicrobia	Methanosarcinales	Methanosarcinaceae	Methanosarcina	Methanosarcina barkeri	-	0	0	0	0	0	0	0	0	0	0	0	0	0	0	0	0	0	0	0	0	0	0	0	0	0	0	0	0	0	4	3	4	0	0	0	0	0	0
PYRG_METBF CTP synthase OS=Methanosarcina barkeri (strain Fusaro / DSM 804) GN=pyrG PE=3 SV=1	K01937	6.3.4.2	Archaea	Unknown	Euryarchaeota	Methanomicrobia	Methanosarcinales	Methanosarcinaceae	Methanosarcina	Methanosarcina barkeri	-	0	0	0	0	0	0	0	0	0	0	0	0	0	0	0	0	0	0	0	0	0	0	0	0	0	0	0	0	0	0	0	0	0	0	0	0	0	1
MG: UPF0288 protein Mbar_A0706 OS=Methanosarcina barkeri (strain Fusaro / DSM 804) GN=Mbar_A0706 PE=3 SV=1 [Q46EK8] Score: 303.0	-	-	Archaea	Unknown	Euryarchaeota	Methanomicrobia	Methanosarcinales	Methanosarcinaceae	Methanosarcina	Methanosarcina barkeri	-	0	0	0	0	0	0	0	0	0	0	0	0	0	0	0	0	0	0	0	0	0	0	0	0	0	0	0	0	0	0	0	0	0	0	0	0	0	0
MG: Phosphoribosylformylglycinamidine cyclo-ligase OS=Methanosarcina barkeri (strain Fusaro / DSM 804) GN=purM PE=3 SV=1 [Q46E56] Score: 345.0	K01933	6.3.3.1	Archaea	Unknown	Euryarchaeota	Methanomicrobia	Methanosarcinales	Methanosarcinaceae	Methanosarcina	Methanosarcina barkeri	-	0	0	0	0	0	0	0	0	0	0	0	0	0	0	0	0	0	0	0	0	0	0	0	0	0	0	0	0	0	0	0	0	0	0	0	0	0	0
PYRB_METBF Aspartate carbamoyltransferase OS=Methanosarcina barkeri (strain Fusaro / DSM 804) GN=pyrB PE=3 SV=1	K00609	2.1.3.2	Archaea	Unknown	Euryarchaeota	Methanomicrobia	Methanosarcinales	Methanosarcinaceae	Methanosarcina	Methanosarcina barkeri	-	0	0	0	0	0	0	0	0	0	0	0	0	0	0	0	0	0	0	0	0	0	0	0	0	0	0	0	0	0	0	0	0	0	0	0	0	0	0
MG: Uncharacterized protein in nifH2 5'region OS=Methanosarcina barkeri PE=3 SV=1 [P54805] Score: 43.9	-	-	Archaea	Unknown	Euryarchaeota	Methanomicrobia	Methanosarcinales	Methanosarcinaceae	Methanosarcina	Methanosarcina barkeri	-	0	0	0	0	0	0	0	0	0	0	0	0	0	0	0	0	0	0	0	0	0	0	0	0	0	0	0	0	0	0	0	0	0	0	0	0	0	0
MG: Tetrahydromethanopterin S-methyltransferase subunit C OS=Methanosarcina mazei (strain ATCC BAA-159 / DSM 3647 / Goe1 / Go1 / JCM 11833 / OCM 88) GN=mtrC PE=3 SV=2 [O59638] Score: 187.0	K00579	2.1.1.86	Archaea	Unknown	Euryarchaeota	Methanomicrobia	Methanosarcinales	Methanosarcinaceae	Methanosarcina	Methanosarcina mazei	-	28	27	42	27	34	34	24	45	48	47	26	32	23	24	27	25	30	31	12	21	9	9	11	17	55	42	43	39	12	25	2	5	16	23	41	37	32	64
MG: Tetrahydromethanopterin S-methyltransferase subunit D OS=Methanosarcina mazei (strain ATCC BAA-159 / DSM 3647 / Goe1 / Go1 / JCM 11833 / OCM 88) GN=mtrD PE=1 SV=3 [P80653] Score: 185.0	K00580	2.1.1.86	Archaea	Unknown	Euryarchaeota	Methanomicrobia	Methanosarcinales	Methanosarcinaceae	Methanosarcina	Methanosarcina mazei	-	171	147	109	115	53	59	39	42	63	53	29	32	61	54	64	49	49	64	48	53	30	34	23	22	66	54	65	68	22	37	28	31	50	59	37	36	26	76
MG: Probable cyclic pyranopterin monophosphate synthase OS=Methanosarcina mazei (strain ATCC BAA-159 / DSM 3647 / Goe1 / Go1 / JCM 11833 / OCM 88) GN=moaA PE=3 SV=1 [Q8PX29] Score: 58.2	K03639	4.1.99.18	Archaea	Unknown	Euryarchaeota	Methanomicrobia	Methanosarcinales	Methanosarcinaceae	Methanosarcina	Methanosarcina mazei	-	2	0	0	0	0	0	0	0	0	0	0	0	0	0	0	0	0	0	0	0	0	0	0	0	0	0	0	0	0	0	0	0	0	0	0	0	0	0
MG: 50S ribosomal protein L32e OS=Methanosarcina mazei (strain ATCC BAA-159 / DSM 3647 / Goe1 / Go1 / JCM 11833 / OCM 88) GN=rpl32e PE=3 SV=2 [Q8PV33] Score: 163.0	K02912	-	Archaea	Unknown	Euryarchaeota	Methanomicrobia	Methanosarcinales	Methanosarcinaceae	Methanosarcina	Methanosarcina mazei	-	0	0	1	3	5	6	0	0	0	0	0	1	0	0	0	0	0	0	0	0	0	0	0	0	0	0	0	0	0	0	0	0	0	0	0	0	0	0
MG: 50S ribosomal protein L18Ae OS=Methanosarcina mazei (strain ATCC BAA-159 / DSM 3647 / Goe1 / Go1 / JCM 11833 / OCM 88) GN=rpl18a PE=3 SV=1 [Q8PYQ2] Score: 108.0	K02944	-	Archaea	Unknown	Euryarchaeota	Methanomicrobia	Methanosarcinales	Methanosarcinaceae	Methanosarcina	Methanosarcina mazei	-	0	0	0	0	4	3	0	0	0	0	0	0	0	0	0	0	0	0	0	0	0	0	0	0	0	0	0	0	0	0	0	0	0	0	0	0	0	0
MG: Putative ankyrin repeat protein MM_0045 OS=Methanosarcina mazei (strain ATCC BAA-159 / DSM 3647 / Goe1 / Go1 / JCM 11833 / OCM 88) GN=MM_0045 PE=3 SV=1 [Q8Q0U0] Score: 415.0	-	-	Archaea	Unknown	Euryarchaeota	Methanomicrobia	Methanosarcinales	Methanosarcinaceae	Methanosarcina	Methanosarcina mazei	-	0	0	0	0	2	1	2	0	1	2	1	1	0	0	0	0	0	0	0	0	0	0	0	0	0	0	0	0	0	0	0	0	0	0	0	0	0	0
PASYA_METMA Pantothenate synthetase OS=Methanosarcina mazei (strain ATCC BAA-159 / DSM 3647 / Goe1 / Go1 / JCM 11833 / OCM 88) GN=MM_2281 PE=1 SV=1	K09722	6.3.2.44	Archaea	Unknown	Euryarchaeota	Methanomicrobia	Methanosarcinales	Methanosarcinaceae	Methanosarcina	Methanosarcina mazei	-	0	0	0	0	2	1	0	0	0	0	0	0	0	0	0	0	0	0	0	0	0	0	0	0	0	0	0	0	0	0	0	0	0	0	0	0	0	0
MG: Orotate phosphoribosyltransferase OS=Methanosarcina mazei (strain ATCC BAA-159 / DSM 3647 / Goe1 / Go1 / JCM 11833 / OCM 88) GN=pyrE PE=3 SV=1 [Q8Q0J4] Score: 311.0	K00762	2.4.2.10	Archaea	Unknown	Euryarchaeota	Methanomicrobia	Methanosarcinales	Methanosarcinaceae	Methanosarcina	Methanosarcina mazei	-	0	0	0	0	1	0	0	0	0	0	0	0	0	0	0	0	0	0	0	0	0	0	0	0	0	0	0	0	0	0	0	0	0	0	0	0	0	0
DP2L_METMA DNA polymerase II large subunit OS=Methanosarcina mazei (strain ATCC BAA-159 / DSM 3647 / Goe1 / Go1 / JCM 11833 / OCM 88) GN=polC PE=3 SV=1	K02322	2.7.7.7	Archaea	Unknown	Euryarchaeota	Methanomicrobia	Methanosarcinales	Methanosarcinaceae	Methanosarcina	Methanosarcina mazei	-	0	0	0	0	1	0	0	0	0	0	0	0	0	0	0	0	0	0	0	0	0	0	0	0	0	0	0	0	0	0	0	0	0	0	0	0	0	0
MG: Tritrans,polycis-undecaprenyl-diphosphate synthase (geranylgeranyl-diphosphate specific) OS=Methanosarcina mazei (strain ATCC BAA-159 / DSM 3647 / Goe1 / Go1 / JCM 11833 / OCM 88) GN=uppS PE=3 SV=2 [Q8PZ76] Score: 251.0	K15888	2.5.1.89	Archaea	Unknown	Euryarchaeota	Methanomicrobia	Methanosarcinales	Methanosarcinaceae	Methanosarcina	Methanosarcina mazei	-	0	0	0	0	1	0	0	0	0	0	0	0	0	0	0	0	0	0	0	0	0	0	0	0	0	0	0	0	0	0	0	0	0	0	0	0	0	0
RPON_METMA DNA-directed RNA polymerase subunit N OS=Methanosarcina mazei (strain ATCC BAA-159 / DSM 3647 / Goe1 / Go1 / JCM 11833 / OCM 88) GN=rpoN PE=3 SV=1	K03058	2.7.7.6	Archaea	Unknown	Euryarchaeota	Methanomicrobia	Methanosarcinales	Methanosarcinaceae	Methanosarcina	Methanosarcina mazei	-	0	0	0	0	1	0	0	0	0	0	0	0	0	0	0	0	0	0	0	0	0	0	0	0	0	0	0	0	0	0	0	0	0	0	0	0	0	0
MG: Geranylgeranyl diphosphate synthase OS=Methanosarcina mazei (strain ATCC BAA-159 / DSM 3647 / Goe1 / Go1 / JCM 11833 / OCM 88) GN=MM_1767 PE=3 SV=1 [Q8PW34] Score: 553.0	K13787	2.5.1.29	Archaea	Unknown	Euryarchaeota	Methanomicrobia	Methanosarcinales	Methanosarcinaceae	Methanosarcina	Methanosarcina mazei	-	0	0	0	0	0	2	5	4	2	0	0	0	0	0	0	0	0	0	0	0	0	0	0	0	0	0	0	0	0	0	0	0	0	0	0	0	0	0
NRPR1_METMA Global nitrogen regulator NrpRI OS=Methanosarcina mazei (strain ATCC BAA-159 / DSM 3647 / Goe1 / Go1 / JCM 11833 / OCM 88) GN=nrpRI PE=1 SV=1	K09720	-	Archaea	Unknown	Euryarchaeota	Methanomicrobia	Methanosarcinales	Methanosarcinaceae	Methanosarcina	Methanosarcina mazei	-	0	0	0	0	0	0	1	0	0	0	0	0	0	0	0	0	0	0	0	0	0	0	0	0	0	0	0	0	0	0	0	0	0	0	0	0	0	0
MG: Dihydromethanopterin reductase (acceptor) OS=Methanosarcina mazei (strain ATCC BAA-159 / DSM 3647 / Goe1 / Go1 / JCM 11833 / OCM 88) GN=dmrX PE=1 SV=1 [Q8PVV3] Score: 476.0	K18853	1.5.99.15	Archaea	Unknown	Euryarchaeota	Methanomicrobia	Methanosarcinales	Methanosarcinaceae	Methanosarcina	Methanosarcina mazei	-	0	0	0	0	0	0	2	0	0	0	0	0	0	0	0	0	0	0	0	0	0	0	0	0	0	0	0	0	0	0	0	0	0	0	0	0	0	0
NRPR2_METMA Global nitrogen regulator NrpRII OS=Methanosarcina mazei (strain ATCC BAA-159 / DSM 3647 / Goe1 / Go1 / JCM 11833 / OCM 88) GN=nrpRII PE=1 SV=1	-	-	Archaea	Unknown	Euryarchaeota	Methanomicrobia	Methanosarcinales	Methanosarcinaceae	Methanosarcina	Methanosarcina mazei	-	0	0	0	0	0	0	6	8	3	6	3	3	0	0	0	0	0	0	0	0	0	1	0	0	0	0	0	0	0	0	0	0	0	0	0	0	0	0
MG: CoB--CoM heterodisulfide reductase 1 iron-sulfur subunit C OS=Methanosarcina mazei (strain ATCC BAA-159 / DSM 3647 / Goe1 / Go1 / JCM 11833 / OCM 88) GN=hdrC PE=3 SV=1 [Q8PY84] Score: 286.0	K03390	1.8.98.1	Archaea	Unknown	Euryarchaeota	Methanomicrobia	Methanosarcinales	Methanosarcinaceae	Methanosarcina	Methanosarcina mazei	-	0	0	0	0	0	0	3	4	1	0	0	0	0	0	0	0	0	0	0	0	0	0	0	0	0	0	0	0	0	0	0	0	0	0	0	0	0	0
MG: DNA-directed RNA polymerase subunit D OS=Methanosarcina mazei (strain ATCC BAA-159 / DSM 3647 / Goe1 / Go1 / JCM 11833 / OCM 88) GN=rpoD PE=3 SV=1 [Q8PV16] Score: 499.0	K03047	2.7.7.6	Archaea	Unknown	Euryarchaeota	Methanomicrobia	Methanosarcinales	Methanosarcinaceae	Methanosarcina	Methanosarcina mazei	-	0	0	0	0	0	0	0	1	3	1	0	0	0	0	0	0	0	0	0	0	0	0	0	0	0	0	0	0	0	0	0	0	0	0	0	0	0	0
MG: MEMO1 family protein MM_1761 OS=Methanosarcina mazei (strain ATCC BAA-159 / DSM 3647 / Goe1 / Go1 / JCM 11833 / OCM 88) GN=MM_1761 PE=3 SV=1 [Q8PW40] Score: 122.0	K06990	-	Archaea	Unknown	Euryarchaeota	Methanomicrobia	Methanosarcinales	Methanosarcinaceae	Methanosarcina	Methanosarcina mazei	-	0	0	0	0	0	0	0	0	2	1	0	0	0	0	0	0	0	0	0	0	0	0	0	0	0	0	0	0	0	0	0	0	0	0	0	0	0	0
MG: F(420)H(2) dehydrogenase subunit I OS=Methanosarcina mazei (strain ATCC BAA-159 / DSM 3647 / Goe1 / Go1 / JCM 11833 / OCM 88) GN=fpoI PE=1 SV=1 [Q8PU60] Score: 83.2	K00338	1.12.98.3	Archaea	Unknown	Euryarchaeota	Methanomicrobia	Methanosarcinales	Methanosarcinaceae	Methanosarcina	Methanosarcina mazei	-	0	0	0	0	0	0	0	0	0	0	0	0	0	0	0	0	0	0	0	0	1	0	0	0	0	0	0	0	0	0	0	0	0	0	0	0	0	0
MG: Trk system potassium uptake protein TrkA homolog 1 OS=Methanosarcina mazei (strain ATCC BAA-159 / DSM 3647 / Goe1 / Go1 / JCM 11833 / OCM 88) GN=trkA1 PE=3 SV=1 [P0CW17] Score: 230.0	K03499	-	Archaea	Unknown	Euryarchaeota	Methanomicrobia	Methanosarcinales	Methanosarcinaceae	Methanosarcina	Methanosarcina mazei	-	0	0	0	0	0	0	0	0	0	0	0	0	0	0	0	0	0	0	0	0	0	0	2	0	0	0	0	0	0	0	0	0	0	0	0	0	0	0
DPO41_METMA DNA polymerase IV 1 OS=Methanosarcina mazei (strain ATCC BAA-159 / DSM 3647 / Goe1 / Go1 / JCM 11833 / OCM 88) GN=dbh1 PE=3 SV=1	K04479	2.7.7.7	Archaea	Unknown	Euryarchaeota	Methanomicrobia	Methanosarcinales	Methanosarcinaceae	Methanosarcina	Methanosarcina mazei	-	0	0	0	0	0	0	0	0	0	0	0	0	0	0	0	0	0	0	0	0	0	0	0	0	1	0	0	0	0	0	0	1	0	0	0	0	0	0
MG: Putative ABC transporter ATP-binding protein MM_2387 OS=Methanosarcina mazei (strain ATCC BAA-159 / DSM 3647 / Goe1 / Go1 / JCM 11833 / OCM 88) GN=MM_2387 PE=3 SV=1 [Q8PUE7] Score: 174.0	K16786|K16787	3.6.3.-	Archaea	Unknown	Euryarchaeota	Methanomicrobia	Methanosarcinales	Methanosarcinaceae	Methanosarcina	Methanosarcina mazei	-	0	0	0	0	0	0	0	0	0	0	0	0	0	0	0	0	0	0	0	0	0	0	0	0	0	1	0	0	0	0	0	0	0	0	0	0	0	0
RPIA_METMA Ribose-5-phosphate isomerase A OS=Methanosarcina mazei (strain ATCC BAA-159 / DSM 3647 / Goe1 / Go1 / JCM 11833 / OCM 88) GN=rpiA PE=3 SV=1	K01807	5.3.1.6	Archaea	Unknown	Euryarchaeota	Methanomicrobia	Methanosarcinales	Methanosarcinaceae	Methanosarcina	Methanosarcina mazei	-	0	0	0	0	0	0	0	0	0	0	0	0	0	0	0	0	0	0	0	0	0	0	0	0	0	0	0	0	0	0	0	0	0	1	0	0	0	0
MG: Carbonic anhydrase OS=Methanosarcina thermophila PE=1 SV=1 [P40881] Score: 442.0	-	4.2.1.1	Archaea	Unknown	Euryarchaeota	Methanomicrobia	Methanosarcinales	Methanosarcinaceae	Methanosarcina	Methanosarcina thermophila	-	0	0	0	0	5	6	18	12	7	4	3	2	0	0	0	0	0	0	0	0	0	1	0	0	0	0	0	0	0	0	0	0	1	0	0	0	0	0
MG: Probable ferredoxin OS=Methanosarcina thermophila PE=3 SV=1 [Q01700] Score: 58.2	-	-	Archaea	Unknown	Euryarchaeota	Methanomicrobia	Methanosarcinales	Methanosarcinaceae	Methanosarcina	Methanosarcina thermophila	-	0	0	0	0	0	0	0	0	0	0	0	0	1	0	0	0	0	0	0	0	0	0	0	0	0	1	0	0	0	0	0	0	0	0	0	0	0	0
MG: Monomethylamine methyltransferase MtmB1 OS=Methanosarcina acetivorans (strain ATCC 35395 / DSM 2834 / JCM 12185 / C2A) GN=mtmB1 PE=3 SV=3 [P58865] Score: 287.0	-	2.1.1.248	Archaea	Unknown	Euryarchaeota	Methanomicrobia	Methanosarcinales	Methanosarcinaceae	Methanosarcina	Unknown	-	2	0	2	3	4	3	4	4	0	6	6	4	2	2	2	0	2	4	0	1	3	2	3	3	0	0	0	0	0	0	0	0	0	0	0	1	0	0
MG: Acetyl-CoA decarbonylase/synthase complex subunit delta 2 OS=Methanosarcina thermophila GN=cdhD2 PE=3 SV=1 [Q9C4Z1] Score: 868.0	-	-	Archaea	Unknown	Euryarchaeota	Methanomicrobia	Methanosarcinales	Methanosarcinaceae	Methanosarcina	Unknown	-	1	0	9	10	286	301	485	382	135	340	140	153	0	0	0	0	0	0	0	0	90	132	138	121	0	0	0	0	0	0	0	0	105	76	107	107	0	0
MG: Tryptophan synthase beta chain 2 OS=Methanosarcina mazei (strain ATCC BAA-159 / DSM 3647 / Goe1 / Go1 / JCM 11833 / OCM 88) GN=trpB2 PE=3 SV=1 [Q8Q001] Score: 506.0	K06001	4.2.1.20	Archaea	Unknown	Euryarchaeota	Methanomicrobia	Methanosarcinales	Methanosarcinaceae	Methanosarcina	Unknown	-	3	4	1	1	3	0	5	6	3	5	1	2	0	0	1	0	0	0	0	0	0	0	0	0	0	0	0	0	0	0	0	0	0	0	0	0	0	0
MG: 2,3-bisphosphoglycerate-independent phosphoglycerate mutase OS=Methanosarcina mazei (strain ATCC BAA-159 / DSM 3647 / Goe1 / Go1 / JCM 11833 / OCM 88) GN=apgM PE=3 SV=1 [Q8PX04] Score: 348.0	K15635	5.4.2.12	Archaea	Unknown	Euryarchaeota	Methanomicrobia	Methanosarcinales	Methanosarcinaceae	Methanosarcina	Unknown	-	0	0	1	0	0	0	0	0	0	0	0	0	0	0	1	1	0	0	0	0	0	1	0	0	0	0	0	0	0	0	0	0	0	0	0	0	0	1
MTD_METMA F420-dependent methylenetetrahydromethanopterin dehydrogenase OS=Methanosarcina mazei (strain ATCC BAA-159 / DSM 3647 / Goe1 / Go1 / JCM 11833 / OCM 88) GN=mtd PE=3 SV=1	K00319	1.5.98.1	Archaea	Unknown	Euryarchaeota	Methanomicrobia	Methanosarcinales	Methanosarcinaceae	Methanosarcina	Unknown	-	0	0	2	0	1	0	6	2	0	0	0	0	0	0	0	0	0	0	0	0	0	0	0	0	0	0	0	0	0	0	0	0	0	0	0	0	0	0
HDRD_METMA CoB--CoM heterodisulfide reductase 2 iron-sulfur subunit D OS=Methanosarcina mazei (strain ATCC BAA-159 / DSM 3647 / Goe1 / Go1 / JCM 11833 / OCM 88) GN=hdrD PE=3 SV=2	K08264	1.8.98.1	Archaea	Unknown	Euryarchaeota	Methanomicrobia	Methanosarcinales	Methanosarcinaceae	Methanosarcina	Unknown	-	0	0	0	1	17	11	58	42	4	38	1	3	0	0	0	0	0	0	0	0	0	2	0	0	0	0	0	0	0	0	0	0	0	0	0	0	0	0
HMC1_METTE Chromosomal protein MC1 OS=Methanosarcina thermophila PE=1 SV=1	-	-	Archaea	Unknown	Euryarchaeota	Methanomicrobia	Methanosarcinales	Methanosarcinaceae	Methanosarcina	Unknown	-	0	0	0	1	42	41	40	34	10	7	6	5	0	0	0	0	0	0	0	0	8	4	4	6	0	0	0	0	0	0	0	0	1	3	7	7	0	0
MG: Tetrahydromethanopterin S-methyltransferase subunit G OS=Methanosarcina mazei (strain ATCC BAA-159 / DSM 3647 / Goe1 / Go1 / JCM 11833 / OCM 88) GN=mtrG PE=1 SV=2 [P80656] Score: 137.0	K00583	2.1.1.86	Archaea	Unknown	Euryarchaeota	Methanomicrobia	Methanosarcinales	Methanosarcinaceae	Methanosarcina	Unknown	-	0	0	0	0	8	14	35	29	16	16	4	12	0	0	0	0	0	0	0	0	7	9	6	7	0	0	0	0	0	0	0	0	0	0	0	0	0	0
MG: 10 kDa chaperonin OS=Methanosarcina acetivorans (strain ATCC 35395 / DSM 2834 / JCM 12185 / C2A) GN=groS PE=3 SV=1 [Q8TGX8] Score: 168.0	-	-	Archaea	Unknown	Euryarchaeota	Methanomicrobia	Methanosarcinales	Methanosarcinaceae	Methanosarcina	Unknown	-	0	0	0	0	2	4	2	2	0	0	0	0	12	7	9	15	4	4	4	8	0	0	0	0	0	0	0	0	0	0	0	0	0	0	0	0	0	0
MG: Prefoldin subunit beta OS=Methanosarcina acetivorans (strain ATCC 35395 / DSM 2834 / JCM 12185 / C2A) GN=pfdB PE=3 SV=1 [Q8TJD5] Score: 179.0	K04798	-	Archaea	Unknown	Euryarchaeota	Methanomicrobia	Methanosarcinales	Methanosarcinaceae	Methanosarcina	Unknown	-	0	0	0	0	30	37	25	25	24	29	19	23	0	0	0	0	0	0	0	0	3	0	0	0	0	0	0	0	0	0	0	0	2	2	12	11	0	0
RS24_METMA 30S ribosomal protein S24e OS=Methanosarcina mazei (strain ATCC BAA-159 / DSM 3647 / Goe1 / Go1 / JCM 11833 / OCM 88) GN=rps24e PE=1 SV=1	K02974	-	Archaea	Unknown	Euryarchaeota	Methanomicrobia	Methanosarcinales	Methanosarcinaceae	Methanosarcina	Unknown	-	0	0	0	0	22	23	14	11	8	9	10	5	0	0	0	0	0	0	0	0	0	0	0	0	0	0	0	0	0	0	0	0	0	0	0	0	0	0
MG: UPF0147 protein MA_0092 OS=Methanosarcina acetivorans (strain ATCC 35395 / DSM 2834 / JCM 12185 / C2A) GN=MA_0092 PE=3 SV=1 [Q8TUH5] Score: 139.0	K09721	-	Archaea	Unknown	Euryarchaeota	Methanomicrobia	Methanosarcinales	Methanosarcinaceae	Methanosarcina	Unknown	-	0	0	0	0	38	43	44	45	21	16	8	14	0	0	0	0	0	0	0	0	1	7	7	3	0	0	0	0	0	0	0	0	1	2	13	8	0	0
MG: Tetrahydromethanopterin S-methyltransferase subunit B OS=Methanosarcina mazei (strain ATCC BAA-159 / DSM 3647 / Goe1 / Go1 / JCM 11833 / OCM 88) GN=mtrB PE=1 SV=4 [P80655] Score: 202.0	K00578	2.1.1.86	Archaea	Unknown	Euryarchaeota	Methanomicrobia	Methanosarcinales	Methanosarcinaceae	Methanosarcina	Unknown	-	0	0	0	0	22	62	49	27	60	72	22	38	14	6	0	2	1	1	0	0	0	0	0	0	2	2	5	5	0	0	1	2	1	1	5	3	1	13
RS3_METBF 30S ribosomal protein S3 OS=Methanosarcina barkeri (strain Fusaro / DSM 804) GN=rps3 PE=3 SV=1	K02982	-	Archaea	Unknown	Euryarchaeota	Methanomicrobia	Methanosarcinales	Methanosarcinaceae	Methanosarcina	Unknown	-	0	0	0	0	1	0	1	4	0	0	0	0	0	0	0	0	0	0	0	0	0	0	0	0	0	0	0	0	0	0	0	0	0	0	0	0	0	0
MG: Phosphoglycerate kinase 2 OS=Methanosarcina acetivorans (strain ATCC 35395 / DSM 2834 / JCM 12185 / C2A) GN=pgk2 PE=3 SV=1 [Q8TK32] Score: 726.0	K00927	2.7.2.3	Archaea	Unknown	Euryarchaeota	Methanomicrobia	Methanosarcinales	Methanosarcinaceae	Methanosarcina	Unknown	-	0	0	0	0	2	4	1	3	3	4	2	3	0	0	0	0	0	0	0	0	0	0	0	0	0	0	0	0	0	0	0	0	0	0	0	0	0	0
MG: Methylcobamide:CoM methyltransferase MtbA OS=Methanosarcina acetivorans (strain ATCC 35395 / DSM 2834 / JCM 12185 / C2A) GN=mtbA PE=3 SV=2 [P58869] Score: 641.0	K14082	2.1.1.247	Archaea	Unknown	Euryarchaeota	Methanomicrobia	Methanosarcinales	Methanosarcinaceae	Methanosarcina	Unknown	-	0	0	0	0	10	10	64	53	36	42	13	11	0	0	2	0	0	0	0	0	0	0	0	0	1	0	0	0	1	0	0	0	0	1	0	3	0	0
RADA_METBF DNA repair and recombination protein RadA OS=Methanosarcina barkeri (strain Fusaro / DSM 804) GN=radA PE=3 SV=1	K04483	-	Archaea	Unknown	Euryarchaeota	Methanomicrobia	Methanosarcinales	Methanosarcinaceae	Methanosarcina	Unknown	-	0	0	0	0	1	0	3	1	0	0	0	0	0	0	0	0	0	0	0	0	2	1	3	1	0	0	0	0	0	0	0	0	0	0	0	0	0	0
MG: 4-hydroxy-tetrahydrodipicolinate reductase OS=Methanosarcina barkeri (strain Fusaro / DSM 804) GN=dapB PE=3 SV=1 [Q46DC3] Score: 479.0	K00215	1.17.1.8	Archaea	Unknown	Euryarchaeota	Methanomicrobia	Methanosarcinales	Methanosarcinaceae	Methanosarcina	Unknown	-	0	0	0	0	3	3	6	7	1	2	1	1	0	0	0	0	0	0	0	0	0	0	0	0	0	0	0	0	0	0	0	0	0	0	0	0	0	0
MG: Protein GrpE OS=Methanosarcina acetivorans (strain ATCC 35395 / DSM 2834 / JCM 12185 / C2A) GN=grpE PE=3 SV=1 [Q8TQR3] Score: 317.0	-	-	Archaea	Unknown	Euryarchaeota	Methanomicrobia	Methanosarcinales	Methanosarcinaceae	Methanosarcina	Unknown	-	0	0	0	0	10	4	1	2	2	6	2	2	0	0	0	0	0	0	0	0	0	0	0	0	0	0	0	0	0	0	0	0	0	0	0	0	0	0
MG: 30S ribosomal protein S4e OS=Methanosarcina barkeri (strain Fusaro / DSM 804) GN=rps4e PE=3 SV=1 [Q46GA7] Score: 442.0	K02987	-	Archaea	Unknown	Euryarchaeota	Methanomicrobia	Methanosarcinales	Methanosarcinaceae	Methanosarcina	Unknown	-	0	0	0	0	7	4	6	13	2	0	0	0	0	0	0	0	0	0	0	0	0	0	0	0	0	0	0	0	0	0	0	0	0	0	0	0	0	0
MG: Putative methyltransferase mtx subunit X OS=Methanosarcina barkeri (strain Fusaro / DSM 804) GN=mtxX PE=3 SV=1 [O32853] Score: 479.0	-	2.1.1.-	Archaea	Unknown	Euryarchaeota	Methanomicrobia	Methanosarcinales	Methanosarcinaceae	Methanosarcina	Unknown	-	0	0	0	0	8	7	1	1	0	0	0	0	0	2	0	0	0	0	0	0	0	0	0	0	2	7	0	0	0	0	0	0	0	1	0	0	0	0
MG: Bifunctional protein FolD OS=Methanosarcina mazei (strain ATCC BAA-159 / DSM 3647 / Goe1 / Go1 / JCM 11833 / OCM 88) GN=folD PE=3 SV=1 [Q8PZQ1] Score: 516.0	K01491	1.5.1.5|3.5.4.9	Archaea	Unknown	Euryarchaeota	Methanomicrobia	Methanosarcinales	Methanosarcinaceae	Methanosarcina	Unknown	-	0	0	0	0	2	0	8	3	6	9	2	0	0	0	0	0	0	0	0	0	0	0	0	0	0	0	0	0	0	0	0	0	0	0	0	0	0	0
MG: CoB--CoM heterodisulfide reductase 2 subunit E OS=Methanosarcina acetivorans (strain ATCC 35395 / DSM 2834 / JCM 12185 / C2A) GN=hdrE PE=3 SV=1 [Q8TSV8] Score: 447.0	K08265	1.8.98.1	Archaea	Unknown	Euryarchaeota	Methanomicrobia	Methanosarcinales	Methanosarcinaceae	Methanosarcina	Unknown	-	0	0	0	0	10	7	2	0	1	0	0	0	0	0	0	0	0	0	0	0	0	0	0	0	0	0	0	0	0	0	0	0	0	0	0	0	0	0
MG: 50S ribosomal protein L18 OS=Methanosarcina barkeri (strain Fusaro / DSM 804) GN=rpl18 PE=3 SV=1 [Q46GB4] Score: 345.0	K02881	-	Archaea	Unknown	Euryarchaeota	Methanomicrobia	Methanosarcinales	Methanosarcinaceae	Methanosarcina	Unknown	-	0	0	0	0	4	2	38	9	2	2	0	0	0	0	0	0	0	0	0	0	0	1	2	0	0	0	0	0	0	0	0	0	1	1	0	0	0	0
MG: Protease HtpX homolog 1 OS=Methanosarcina acetivorans (strain ATCC 35395 / DSM 2834 / JCM 12185 / C2A) GN=htpX1 PE=3 SV=1 [Q8THH5] Score: 506.0	K03799	3.4.24.-	Archaea	Unknown	Euryarchaeota	Methanomicrobia	Methanosarcinales	Methanosarcinaceae	Methanosarcina	Unknown	-	0	0	0	0	38	24	18	22	21	18	12	19	0	0	0	0	0	0	0	0	0	0	0	0	0	0	0	0	0	0	0	0	0	0	0	0	0	0
MG: 30S ribosomal protein S15 OS=Methanosarcina acetivorans (strain ATCC 35395 / DSM 2834 / JCM 12185 / C2A) GN=rps15 PE=3 SV=1 [Q8TS56] Score: 296.0	K02956	-	Archaea	Unknown	Euryarchaeota	Methanomicrobia	Methanosarcinales	Methanosarcinaceae	Methanosarcina	Unknown	-	0	0	0	0	14	2	6	18	0	0	0	0	0	0	0	0	0	0	0	0	1	3	0	0	0	0	0	0	0	0	0	0	0	0	0	0	0	0
MG: 30S ribosomal protein S6e OS=Methanosarcina mazei (strain ATCC BAA-159 / DSM 3647 / Goe1 / Go1 / JCM 11833 / OCM 88) GN=rps6e PE=3 SV=1 [Q8PU79] Score: 231.0	K02991	-	Archaea	Unknown	Euryarchaeota	Methanomicrobia	Methanosarcinales	Methanosarcinaceae	Methanosarcina	Unknown	-	0	0	0	0	24	8	16	20	2	4	1	1	0	0	0	0	0	0	0	0	0	0	0	0	0	0	0	0	0	0	0	0	0	0	0	0	0	0
MG: 30S ribosomal protein S9 OS=Methanosarcina acetivorans (strain ATCC 35395 / DSM 2834 / JCM 12185 / C2A) GN=rps9 PE=3 SV=1 [Q8TT42] Score: 252.0	K02996	-	Archaea	Unknown	Euryarchaeota	Methanomicrobia	Methanosarcinales	Methanosarcinaceae	Methanosarcina	Unknown	-	0	0	0	0	3	1	1	2	0	1	1	0	3	4	5	3	4	2	0	2	0	0	0	0	0	0	0	0	0	0	0	0	0	0	0	0	0	0
MTMC1_METAC Monomethylamine corrinoid protein 1 OS=Methanosarcina acetivorans (strain ATCC 35395 / DSM 2834 / JCM 12185 / C2A) GN=mtmC1 PE=3 SV=2	K16177	-	Archaea	Unknown	Euryarchaeota	Methanomicrobia	Methanosarcinales	Methanosarcinaceae	Methanosarcina	Unknown	-	0	0	0	0	12	7	14	5	8	4	4	2	14	2	2	6	7	13	5	10	6	3	1	7	6	17	2	4	0	0	0	0	0	3	3	1	0	1
IF6_METMA Translation initiation factor 6 OS=Methanosarcina mazei (strain ATCC BAA-159 / DSM 3647 / Goe1 / Go1 / JCM 11833 / OCM 88) GN=eif6 PE=3 SV=1	K03264	-	Archaea	Unknown	Euryarchaeota	Methanomicrobia	Methanosarcinales	Methanosarcinaceae	Methanosarcina	Unknown	-	0	0	0	0	0	1	0	1	0	1	0	0	0	0	0	0	0	0	0	0	0	0	0	0	0	0	0	0	0	0	0	0	0	0	0	0	0	0
RBL_METBF Ribulose bisphosphate carboxylase OS=Methanosarcina barkeri (strain Fusaro / DSM 804) GN=rbcL PE=3 SV=1	K01601	4.1.1.39	Archaea	Unknown	Euryarchaeota	Methanomicrobia	Methanosarcinales	Methanosarcinaceae	Methanosarcina	Unknown	-	0	0	0	0	0	0	1	0	0	0	0	0	0	0	0	0	0	0	0	0	0	0	0	0	0	0	0	0	0	0	0	0	0	0	0	0	0	0
MG: Probable deoxyhypusine synthase 2 OS=Methanosarcina mazei (strain ATCC BAA-159 / DSM 3647 / Goe1 / Go1 / JCM 11833 / OCM 88) GN=dys2 PE=3 SV=1 [Q8Q051] Score: 628.0	K00809	2.5.1.46	Archaea	Unknown	Euryarchaeota	Methanomicrobia	Methanosarcinales	Methanosarcinaceae	Methanosarcina	Unknown	-	0	0	0	0	0	0	2	0	0	0	0	0	1	0	0	0	0	0	0	0	0	0	0	0	0	0	0	0	0	0	0	0	0	0	0	0	0	0
MG: 30S ribosomal protein S17P OS=Methanosarcina barkeri (strain Fusaro / DSM 804) GN=rps17p PE=3 SV=1 [Q46GA4] Score: 215.0	K02961	-	Archaea	Unknown	Euryarchaeota	Methanomicrobia	Methanosarcinales	Methanosarcinaceae	Methanosarcina	Unknown	-	0	0	0	0	0	0	4	0	1	0	0	0	0	0	0	0	0	0	0	0	0	0	0	0	0	0	0	0	0	0	0	0	0	0	0	0	0	0
MG: Phosphoribosyl-ATP pyrophosphatase OS=Methanosarcina barkeri (strain Fusaro / DSM 804) GN=hisE PE=3 SV=1 [Q46AJ8] Score: 197.0	K01523	3.6.1.31	Archaea	Unknown	Euryarchaeota	Methanomicrobia	Methanosarcinales	Methanosarcinaceae	Methanosarcina	Unknown	-	0	0	0	0	0	0	4	2	0	0	0	0	0	0	0	0	0	0	0	0	0	1	0	0	0	0	0	0	0	0	0	0	0	0	0	0	0	0
MG: UPF0284 protein MM_0708 OS=Methanosarcina mazei (strain ATCC BAA-159 / DSM 3647 / Goe1 / Go1 / JCM 11833 / OCM 88) GN=MM_0708 PE=3 SV=1 [Q8PYZ0] Score: 659.0	-	-	Archaea	Unknown	Euryarchaeota	Methanomicrobia	Methanosarcinales	Methanosarcinaceae	Methanosarcina	Unknown	-	0	0	0	0	0	0	0	0	2	2	1	1	0	0	0	0	0	0	0	0	0	0	0	0	0	0	0	0	0	0	0	0	0	0	0	0	0	0
Y3388_METAC Uncharacterized serpin-like protein MA_3388 OS=Methanosarcina acetivorans (strain ATCC 35395 / DSM 2834 / JCM 12185 / C2A) GN=MA_3388 PE=3 SV=1	K13963	-	Archaea	Unknown	Euryarchaeota	Methanomicrobia	Methanosarcinales	Methanosarcinaceae	Methanosarcina	Unknown	-	0	0	0	0	0	0	0	0	0	0	0	0	0	0	0	0	0	0	0	1	0	0	0	0	1	0	0	0	0	0	0	0	0	0	0	0	0	12
MG: Acetylornithine aminotransferase OS=Methanosarcina acetivorans (strain ATCC 35395 / DSM 2834 / JCM 12185 / C2A) GN=argD PE=3 SV=2 [Q8TUE8] Score: 386.0	K00821	2.6.1.11	Archaea	Unknown	Euryarchaeota	Methanomicrobia	Methanosarcinales	Methanosarcinaceae	Methanosarcina	Unknown	-	2	1	0	0	0	0	0	1	0	0	0	0	0	0	0	0	0	0	0	0	0	0	0	0	0	0	0	0	0	0	0	0	0	0	0	0	1	0
MTRE_METAC Tetrahydromethanopterin S-methyltransferase subunit E OS=Methanosarcina acetivorans (strain ATCC 35395 / DSM 2834 / JCM 12185 / C2A) GN=mtrE PE=3 SV=1	K00581	2.1.1.86	Archaea	Unknown	Euryarchaeota	Methanomicrobia	Methanosarcinales	Methanosarcinaceae	Methanosarcina	Unknown	-	0	0	2	7	18	14	25	32	25	24	5	6	0	0	0	0	0	0	0	0	1	3	0	0	0	0	0	0	0	0	0	0	0	1	2	0	0	0
G3P1_METAC Glyceraldehyde-3-phosphate dehydrogenase 1 OS=Methanosarcina acetivorans (strain ATCC 35395 / DSM 2834 / JCM 12185 / C2A) GN=gapA PE=3 SV=1	K00150	1.2.1.59	Archaea	Unknown	Euryarchaeota	Methanomicrobia	Methanosarcinales	Methanosarcinaceae	Methanosarcina	Unknown	-	0	0	0	0	6	3	15	10	9	5	4	2	0	0	0	0	0	0	0	0	0	0	0	0	0	0	0	0	0	0	0	0	0	0	0	1	0	0
MTSB_METBA Methylated-thiol--corrinoid protein MtsB OS=Methanosarcina barkeri GN=mtsB PE=3 SV=1	-	-	Archaea	Unknown	Euryarchaeota	Methanomicrobia	Methanosarcinales	Methanosarcinaceae	Methanosarcina	Unknown	-	0	0	0	0	6	6	24	28	19	21	8	7	0	0	0	0	0	0	0	0	4	3	8	7	1	0	1	0	2	1	0	0	4	3	4	3	1	3
MG: Signal recognition particle 19 kDa protein OS=Methanosarcina mazei (strain ATCC BAA-159 / DSM 3647 / Goe1 / Go1 / JCM 11833 / OCM 88) GN=srp19 PE=3 SV=1 [Q8PWM7] Score: 186.0	K03105	-	Archaea	Unknown	Euryarchaeota	Methanomicrobia	Methanosarcinales	Methanosarcinaceae	Methanosarcina	Unknown	-	0	0	0	0	3	2	0	0	0	0	0	0	0	0	0	0	0	0	0	0	0	0	0	0	0	0	0	0	0	0	0	0	0	0	0	0	0	0
IF1A1_METMA Translation initiation factor 1A 1 OS=Methanosarcina mazei (strain ATCC BAA-159 / DSM 3647 / Goe1 / Go1 / JCM 11833 / OCM 88) GN=eIF1A1 PE=3 SV=2	K03236	-	Archaea	Unknown	Euryarchaeota	Methanomicrobia	Methanosarcinales	Methanosarcinaceae	Methanosarcina	Unknown	-	0	0	0	0	4	4	12	14	2	0	0	0	0	0	0	0	0	0	0	0	1	0	1	1	0	0	0	0	0	0	0	0	0	0	0	0	0	0
MG: GMP synthase [glutamine-hydrolyzing] subunit B OS=Methanosarcina acetivorans (strain ATCC 35395 / DSM 2834 / JCM 12185 / C2A) GN=guaAB PE=3 SV=1 [Q8THK3] Score: 575.0	K01951	6.3.5.2	Archaea	Unknown	Euryarchaeota	Methanomicrobia	Methanosarcinales	Methanosarcinaceae	Methanosarcina	Unknown	-	0	0	0	0	3	0	0	0	0	0	0	0	0	0	0	0	0	0	0	0	0	0	0	0	0	0	0	0	0	0	0	0	0	0	0	0	0	0
RL1_METAC 50S ribosomal protein L1 OS=Methanosarcina acetivorans (strain ATCC 35395 / DSM 2834 / JCM 12185 / C2A) GN=rpl1 PE=3 SV=1	K02863	-	Archaea	Unknown	Euryarchaeota	Methanomicrobia	Methanosarcinales	Methanosarcinaceae	Methanosarcina	Unknown	-	0	0	0	0	23	17	19	18	6	7	6	3	0	0	0	0	0	0	0	0	0	1	0	0	0	0	0	0	0	0	0	0	3	2	2	2	0	0
ACDE1_METMA Acetyl-CoA decarbonylase/synthase complex subunit epsilon 1 OS=Methanosarcina mazei (strain ATCC BAA-159 / DSM 3647 / Goe1 / Go1 / JCM 11833 / OCM 88) GN=cdhB1 PE=1 SV=1	-	-	Archaea	Unknown	Euryarchaeota	Methanomicrobia	Methanosarcinales	Methanosarcinaceae	Methanosarcina	Unknown	-	0	0	0	0	17	17	16	22	52	51	48	51	0	0	0	0	0	0	0	0	49	46	30	35	0	0	0	0	0	0	0	0	16	13	50	36	0	0
MG: 50S ribosomal protein L1 OS=Methanosarcina barkeri (strain Fusaro / DSM 804) GN=rpl1 PE=3 SV=1 [Q46EU8] Score: 409.0	K02863	-	Archaea	Unknown	Euryarchaeota	Methanomicrobia	Methanosarcinales	Methanosarcinaceae	Methanosarcina	Unknown	-	0	0	0	0	18	20	39	39	18	16	15	12	0	0	0	0	0	0	0	0	0	1	0	0	0	0	0	0	0	0	0	0	3	3	2	2	0	0
MG: 30S ribosomal protein S13 OS=Methanosarcina mazei (strain ATCC BAA-159 / DSM 3647 / Goe1 / Go1 / JCM 11833 / OCM 88) GN=rps13 PE=3 SV=1 [Q8PV19] Score: 285.0	K02952	-	Archaea	Unknown	Euryarchaeota	Methanomicrobia	Methanosarcinales	Methanosarcinaceae	Methanosarcina	Unknown	-	0	0	0	0	12	8	15	21	4	4	2	0	0	0	0	0	0	0	0	0	0	1	0	0	0	0	0	0	0	0	0	0	0	0	0	0	0	0
RL29_METAC 50S ribosomal protein L29P OS=Methanosarcina acetivorans (strain ATCC 35395 / DSM 2834 / JCM 12185 / C2A) GN=rpl29p PE=3 SV=1	K02904	-	Archaea	Unknown	Euryarchaeota	Methanomicrobia	Methanosarcinales	Methanosarcinaceae	Methanosarcina	Unknown	-	0	0	0	0	5	0	0	0	0	0	0	0	0	0	0	0	0	0	0	0	0	0	0	0	0	0	0	0	0	0	0	0	0	0	0	0	0	0
Y2357_METMA UPF0212 protein MM_2357 OS=Methanosarcina mazei (strain ATCC BAA-159 / DSM 3647 / Goe1 / Go1 / JCM 11833 / OCM 88) GN=MM_2357 PE=3 SV=1	K09731	-	Archaea	Unknown	Euryarchaeota	Methanomicrobia	Methanosarcinales	Methanosarcinaceae	Methanosarcina	Unknown	-	0	0	0	0	12	16	8	9	6	13	7	7	0	0	0	0	0	0	0	0	2	3	0	0	0	0	0	0	0	0	0	0	0	0	0	0	0	0
RL22_METMA 50S ribosomal protein L22 OS=Methanosarcina mazei (strain ATCC BAA-159 / DSM 3647 / Goe1 / Go1 / JCM 11833 / OCM 88) GN=rpl22 PE=3 SV=1	K02890	-	Archaea	Unknown	Euryarchaeota	Methanomicrobia	Methanosarcinales	Methanosarcinaceae	Methanosarcina	Unknown	-	0	0	0	0	11	12	15	12	0	0	0	0	0	0	0	0	0	0	0	0	0	0	0	0	0	0	0	0	0	0	0	0	0	0	0	0	0	0
MG: 3-dehydroquinate synthase OS=Methanosarcina barkeri (strain Fusaro / DSM 804) GN=aroB' PE=3 SV=1 [Q46DZ8] Score: 696.0	K11646	1.4.1.24	Archaea	Unknown	Euryarchaeota	Methanomicrobia	Methanosarcinales	Methanosarcinaceae	Methanosarcina	Unknown	-	0	0	0	0	0	0	2	0	1	0	0	0	0	0	0	0	0	0	0	0	0	0	0	0	0	0	0	0	0	0	0	0	0	0	0	0	0	0
MDH_METAC Malate dehydrogenase OS=Methanosarcina acetivorans (strain ATCC 35395 / DSM 2834 / JCM 12185 / C2A) GN=mdh PE=3 SV=1	K00024	1.1.1.37	Archaea	Unknown	Euryarchaeota	Methanomicrobia	Methanosarcinales	Methanosarcinaceae	Methanosarcina	Unknown	-	0	0	0	0	0	0	3	2	0	0	0	0	0	0	0	0	0	0	0	0	0	0	0	0	0	0	0	0	0	0	0	0	0	0	0	0	0	0
MG: Gamma-glutamyl phosphate reductase OS=Methanosarcina mazei (strain ATCC BAA-159 / DSM 3647 / Goe1 / Go1 / JCM 11833 / OCM 88) GN=proA PE=3 SV=1 [Q8PYP2] Score: 817.0	K00147	1.2.1.41	Archaea	Unknown	Euryarchaeota	Methanomicrobia	Methanosarcinales	Methanosarcinaceae	Methanosarcina	Unknown	-	0	0	0	0	0	0	1	0	0	0	0	0	0	0	0	0	0	0	0	0	0	0	0	0	0	0	0	0	0	0	0	0	0	0	0	0	0	0
MG: Dimethylamine methyltransferase MtbB1 OS=Methanosarcina barkeri GN=mtbB1 PE=1 SV=3 [O93661] Score: 694.0	K16178	2.1.1.249	Archaea	Unknown	Euryarchaeota	Methanomicrobia	Methanosarcinales	Methanosarcinaceae	Methanosarcina	Unknown	-	0	0	0	0	0	0	3	1	55	70	21	18	0	0	0	0	0	0	0	0	0	0	0	0	0	0	0	0	0	0	0	0	4	1	0	2	0	0
MG: Glutamyl-tRNA(Gln) amidotransferase subunit D OS=Methanosarcina mazei (strain ATCC BAA-159 / DSM 3647 / Goe1 / Go1 / JCM 11833 / OCM 88) GN=gatD PE=3 SV=1 [Q8PUM7] Score: 701.0	K09482	6.3.5.-	Archaea	Unknown	Euryarchaeota	Methanomicrobia	Methanosarcinales	Methanosarcinaceae	Methanosarcina	Unknown	-	0	0	0	0	0	0	0	0	1	1	0	0	0	0	0	0	0	0	0	0	0	0	0	0	0	0	0	0	0	0	0	0	0	0	0	0	0	0
OTC_METMA Ornithine carbamoyltransferase OS=Methanosarcina mazei (strain ATCC BAA-159 / DSM 3647 / Goe1 / Go1 / JCM 11833 / OCM 88) GN=argF PE=3 SV=2	K00611	2.1.3.3	Archaea	Unknown	Euryarchaeota	Methanomicrobia	Methanosarcinales	Methanosarcinaceae	Methanosarcina	Unknown	-	0	0	0	0	0	0	0	0	0	2	0	0	0	0	0	0	0	0	0	0	0	0	0	0	0	0	0	0	0	0	0	0	0	0	0	0	0	0
MG: DNA-directed RNA polymerase subunit A'' OS=Methanosarcina mazei (strain ATCC BAA-159 / DSM 3647 / Goe1 / Go1 / JCM 11833 / OCM 88) GN=rpoA2 PE=3 SV=1 [Q8PUR2] Score: 414.0	K03042	2.7.7.6	Archaea	Unknown	Euryarchaeota	Methanomicrobia	Methanosarcinales	Methanosarcinaceae	Methanosarcina	Unknown	-	0	0	0	0	0	0	0	0	0	0	2	0	0	0	0	0	0	0	0	0	0	0	0	0	0	0	0	0	0	0	0	0	0	0	0	0	0	0
MG: Sirohydrochlorin cobaltochelatase OS=Methanosarcina barkeri (strain Fusaro / DSM 804) GN=cbiX PE=1 SV=1 [P61816] Score: 127.0	K03795	4.99.1.3	Archaea	Unknown	Euryarchaeota	Methanomicrobia	Methanosarcinales	Methanosarcinaceae	Unknown	Unknown	-	1	0	0	0	26	31	21	20	6	8	2	4	11	12	11	8	6	3	3	6	1	0	0	0	11	15	13	11	281	317	180	139	2	2	11	3	69	69
MG: Pyruvoyl-dependent arginine decarboxylase 2 OS=Methanosarcina acetivorans (strain ATCC 35395 / DSM 2834 / JCM 12185 / C2A) GN=pdaD2 PE=3 SV=1 [Q8TKB4] Score: 264.0	K02626	4.1.1.19	Archaea	Unknown	Euryarchaeota	Methanomicrobia	Methanosarcinales	Methanosarcinaceae	Unknown	Unknown	-	0	1	0	0	0	1	2	4	0	0	0	0	0	0	0	0	0	0	0	0	0	0	0	0	0	0	0	0	0	0	0	0	0	0	0	0	0	0
PFDB_METBF Prefoldin subunit beta OS=Methanosarcina barkeri (strain Fusaro / DSM 804) GN=pfdB PE=3 SV=1	K04798	-	Archaea	Unknown	Euryarchaeota	Methanomicrobia	Methanosarcinales	Methanosarcinaceae	Unknown	Unknown	-	0	0	0	0	7	5	1	3	0	0	0	0	0	0	0	0	0	0	0	0	3	2	0	0	0	0	0	0	0	0	0	0	0	0	0	0	0	0
MG: AMP phosphorylase OS=Methanococcoides burtonii (strain DSM 6242 / NBRC 107633 / OCM 468 / ACE-M) GN=Mbur_0255 PE=3 SV=1 [Q12Z64] Score: 696.0	K18931	2.4.2.57	Archaea	Unknown	Euryarchaeota	Methanomicrobia	Methanosarcinales	Methanosarcinaceae	Unknown	Unknown	-	0	0	0	0	2	0	2	9	1	0	0	0	0	0	0	0	0	0	0	0	0	0	0	0	0	0	0	0	0	0	0	0	0	0	0	5	0	0
MG: 50S ribosomal protein L10 OS=Methanococcoides burtonii (strain DSM 6242 / NBRC 107633 / OCM 468 / ACE-M) GN=rpl10 PE=3 SV=1 [Q12UP8] Score: 253.0	K02864	-	Archaea	Unknown	Euryarchaeota	Methanomicrobia	Methanosarcinales	Methanosarcinaceae	Unknown	Unknown	-	0	0	0	0	6	1	0	0	0	0	0	0	1	3	4	0	0	0	0	0	0	0	0	0	11	15	7	7	0	0	0	0	0	0	0	0	0	0
MG: 50S ribosomal protein L10 OS=Methanosarcina acetivorans (strain ATCC 35395 / DSM 2834 / JCM 12185 / C2A) GN=rpl10 PE=3 SV=1 [Q8TI80] Score: 200.0	K02864	-	Archaea	Unknown	Euryarchaeota	Methanomicrobia	Methanosarcinales	Methanosarcinaceae	Unknown	Unknown	-	0	0	0	0	6	1	6	6	2	1	1	1	7	2	4	5	1	0	4	6	0	0	0	0	23	31	12	17	0	0	0	0	0	0	0	0	0	0
AROA_METAC 3-phosphoshikimate 1-carboxyvinyltransferase OS=Methanosarcina acetivorans (strain ATCC 35395 / DSM 2834 / JCM 12185 / C2A) GN=aroA PE=3 SV=1	K00800	2.5.1.19	Archaea	Unknown	Euryarchaeota	Methanomicrobia	Methanosarcinales	Methanosarcinaceae	Unknown	Unknown	-	0	0	0	0	5	0	0	0	0	0	0	0	0	0	0	0	0	0	0	0	0	0	0	0	0	0	1	0	0	0	0	0	0	0	0	0	0	0
RS2_METBF 30S ribosomal protein S2 OS=Methanosarcina barkeri (strain Fusaro / DSM 804) GN=rps2 PE=3 SV=2	K02967	-	Archaea	Unknown	Euryarchaeota	Methanomicrobia	Methanosarcinales	Methanosarcinaceae	Unknown	Unknown	-	0	0	0	0	5	1	5	3	0	1	0	0	0	0	0	0	0	0	0	0	0	0	0	0	0	0	0	0	0	0	0	0	0	0	0	0	0	0
MG: Cytidylate kinase OS=Methanosarcina barkeri (strain Fusaro / DSM 804) GN=cmk PE=3 SV=1 [Q46GC2] Score: 326.0	K00945	2.7.4.25	Archaea	Unknown	Euryarchaeota	Methanomicrobia	Methanosarcinales	Methanosarcinaceae	Unknown	Unknown	-	0	0	0	0	0	2	0	0	0	0	0	0	0	0	0	0	0	0	0	0	0	1	0	0	0	0	0	0	0	0	0	0	0	0	0	0	0	0
MG: 2-phospho-L-lactate transferase OS=Methanosarcina acetivorans (strain ATCC 35395 / DSM 2834 / JCM 12185 / C2A) GN=cofD PE=3 SV=2 [Q8TST1] Score: 531.0	K11212	2.7.8.28	Archaea	Unknown	Euryarchaeota	Methanomicrobia	Methanosarcinales	Methanosarcinaceae	Unknown	Unknown	-	0	0	0	0	0	0	3	1	6	5	2	0	0	0	0	0	0	0	0	0	0	0	0	0	0	0	0	0	0	0	0	0	0	0	0	0	0	0
MG: Tyrosine--tRNA ligase OS=Methanosarcina mazei (strain ATCC BAA-159 / DSM 3647 / Goe1 / Go1 / JCM 11833 / OCM 88) GN=tyrS PE=3 SV=1 [Q8PVK0] Score: 602.0	K01866	6.1.1.1	Archaea	Unknown	Euryarchaeota	Methanomicrobia	Methanosarcinales	Methanosarcinaceae	Unknown	Unknown	-	0	0	0	0	11	10	16	4	11	9	2	0	0	0	0	0	0	0	0	0	0	0	0	0	0	0	0	0	0	0	0	0	0	0	0	0	0	0
MG: 30S ribosomal protein S12 OS=Methanosarcina mazei (strain ATCC BAA-159 / DSM 3647 / Goe1 / Go1 / JCM 11833 / OCM 88) GN=rps12 PE=3 SV=1 [Q8PUR5] Score: 248.0	K02950	-	Archaea	Unknown	Euryarchaeota	Methanomicrobia	Methanosarcinales	Methanosarcinaceae	Unknown	Unknown	-	0	0	0	0	10	4	13	9	0	0	0	0	0	0	0	0	0	0	0	0	1	2	0	0	0	0	0	0	0	0	0	0	0	0	0	0	0	0
MG: Arginine--tRNA ligase OS=Methanosarcina mazei (strain ATCC BAA-159 / DSM 3647 / Goe1 / Go1 / JCM 11833 / OCM 88) GN=argS PE=3 SV=1 [Q8PX74] Score: 677.0	K01887	6.1.1.19	Archaea	Unknown	Euryarchaeota	Methanomicrobia	Methanosarcinales	Methanosarcinaceae	Unknown	Unknown	-	2	0	0	0	0	0	0	0	0	0	0	0	0	0	0	0	0	0	0	0	0	0	0	0	0	0	0	0	0	0	0	0	0	0	0	0	0	0
RL11_METBU 50S ribosomal protein L11 OS=Methanococcoides burtonii (strain DSM 6242 / NBRC 107633 / OCM 468 / ACE-M) GN=rpl11 PE=3 SV=1	K02867	-	Archaea	Unknown	Euryarchaeota	Methanomicrobia	Methanosarcinales	Methanosarcinaceae	Unknown	Unknown	-	0	0	0	0	17	9	17	18	12	10	6	1	0	0	0	0	0	0	0	0	5	8	2	6	0	0	0	0	0	0	0	0	0	0	0	0	0	0
PDAD_METBU Pyruvoyl-dependent arginine decarboxylase OS=Methanococcoides burtonii (strain DSM 6242 / NBRC 107633 / OCM 468 / ACE-M) GN=pdaD PE=3 SV=1	K02626	4.1.1.19	Archaea	Unknown	Euryarchaeota	Methanomicrobia	Methanosarcinales	Methanosarcinaceae	Unknown	Unknown	-	0	0	0	0	0	1	2	4	0	0	0	0	0	0	0	0	0	0	0	0	0	0	0	0	0	0	0	0	0	0	0	0	0	0	0	0	0	0
RS2_METBU 30S ribosomal protein S2 OS=Methanococcoides burtonii (strain DSM 6242 / NBRC 107633 / OCM 468 / ACE-M) GN=rps2 PE=3 SV=1	K02967	-	Archaea	Unknown	Euryarchaeota	Methanomicrobia	Methanosarcinales	Methanosarcinaceae	Unknown	Unknown	-	0	0	0	0	0	0	5	3	0	1	0	0	0	0	0	0	0	0	0	0	0	0	0	0	0	0	0	0	0	0	0	0	0	0	0	0	0	0
MG: 5-formaminoimidazole-4-carboxamide-1-(beta)-D-ribofuranosyl 5'-monophosphate synthetase OS=Methanococcoides burtonii (strain DSM 6242 / NBRC 107633 / OCM 468 / ACE-M) GN=purP PE=3 SV=1 [Q12VJ6] Score: 578.0	K06863	6.3.4.23	Archaea	Unknown	Euryarchaeota	Methanomicrobia	Methanosarcinales	Methanosarcinaceae	Unknown	Unknown	-	0	0	0	0	0	0	1	0	0	0	0	0	0	0	0	0	0	0	0	0	0	0	0	0	0	0	0	0	0	0	0	0	0	0	0	0	0	0
RS5_METBU 30S ribosomal protein S5 OS=Methanococcoides burtonii (strain DSM 6242 / NBRC 107633 / OCM 468 / ACE-M) GN=rps5 PE=3 SV=1	K02988	-	Archaea	Unknown	Euryarchaeota	Methanomicrobia	Methanosarcinales	Methanosarcinaceae	Unknown	Unknown	-	0	0	0	0	0	0	1	0	0	0	0	0	0	0	0	0	0	0	0	0	0	0	0	0	0	0	0	0	0	0	0	0	0	0	0	0	0	0
MG: V-type ATP synthase subunit C OS=Methanosaeta thermophila (strain DSM 6194 / PT) GN=atpC PE=3 SV=1 [A0B9K4] Score: 214.0	K02119	-	Archaea	Unknown	Euryarchaeota	Methanomicrobia	Methanosarcinales	Unknown	Unknown	Unknown	-	3	4	2	2	67	51	47	33	4	0	0	3	7	5	12	0	7	4	0	0	21	17	8	19	58	52	37	35	35	15	17	10	1	3	33	20	8	26
MG: 30S ribosomal protein S3Ae OS=Methanosarcina acetivorans (strain ATCC 35395 / DSM 2834 / JCM 12185 / C2A) GN=rps3ae PE=3 SV=2 [Q8TKI9] Score: 376.0	K02984	-	Archaea	Unknown	Euryarchaeota	Methanomicrobia	Methanosarcinales	Unknown	Unknown	Unknown	-	0	0	0	0	57	45	55	70	19	19	8	9	0	0	0	0	0	0	0	0	1	3	0	0	0	0	0	0	0	0	0	0	4	5	9	6	0	0
MG: Adenylosuccinate synthetase 2 OS=Methanosarcina acetivorans (strain ATCC 35395 / DSM 2834 / JCM 12185 / C2A) GN=purA2 PE=3 SV=1 [Q8TIM8] Score: 786.0	K01939	6.3.4.4	Archaea	Unknown	Euryarchaeota	Methanomicrobia	Methanosarcinales	Unknown	Unknown	Unknown	-	0	0	0	0	0	1	4	1	0	0	0	0	0	0	0	0	0	0	0	0	0	0	0	0	0	0	0	0	0	0	0	0	0	0	0	0	0	0
MG: 50S ribosomal protein L4 OS=Methanoculleus marisnigri (strain ATCC 35101 / DSM 1498 / JR1) GN=rpl4 PE=3 SV=1 [A3CSZ8] Score: 466.0	K02930	-	Archaea	Unknown	Euryarchaeota	Methanomicrobia	Unknown	Unknown	Unknown	Unknown	-	6	5	4	2	14	22	13	16	0	0	0	1	3	1	1	0	0	0	0	0	0	2	0	0	0	0	0	0	0	0	0	0	0	0	0	0	0	0
MG: GTP cyclohydrolase MptA OS=Methanoculleus marisnigri (strain ATCC 35101 / DSM 1498 / JR1) GN=mptA PE=3 SV=1 [A3CXJ6] Score: 112.0	K17488	3.5.4.39	Archaea	Unknown	Euryarchaeota	Methanomicrobia	Unknown	Unknown	Unknown	Unknown	-	38	26	0	0	16	21	29	18	19	4	18	15	5	6	2	4	3	2	0	0	2	1	0	0	2	0	0	0	0	8	0	0	0	0	0	0	1	4
MG: Coenzyme F420 hydrogenase subunit alpha OS=Methanosarcina barkeri (strain Fusaro / DSM 804) GN=frhA PE=1 SV=3 [P80489] Score: 700.0	K00440	1.12.98.1	Archaea	Unknown	Euryarchaeota	Methanomicrobia	Unknown	Unknown	Unknown	Unknown	-	227	195	104	46	234	276	210	179	128	120	96	89	20	19	35	24	25	48	11	4	33	48	39	31	68	109	87	67	46	39	38	48	74	49	95	80	127	93
MG: 50S ribosomal protein L13 OS=Methanospirillum hungatei JF-1 (strain ATCC 27890 / DSM 864 / NBRC 100397 / JF-1) GN=rpl13 PE=3 SV=1 [Q2FTN5] Score: 197.0	K02871	-	Archaea	Unknown	Euryarchaeota	Methanomicrobia	Unknown	Unknown	Unknown	Unknown	-	21	19	19	14	70	39	32	49	11	9	12	6	13	12	11	28	13	12	4	2	18	6	3	2	17	10	0	0	2	0	5	6	0	0	0	0	0	0
MG: 50S ribosomal protein L18e OS=Methanosphaerula palustris (strain ATCC BAA-1556 / DSM 19958 / E1-9c) GN=rpl18e PE=3 SV=1 [B8GEG4] Score: 166.0	K02883	-	Archaea	Unknown	Euryarchaeota	Methanomicrobia	Unknown	Unknown	Unknown	Unknown	-	22	17	4	4	25	19	12	13	9	2	6	5	11	12	3	6	6	8	3	4	0	1	0	0	10	15	17	21	0	0	0	0	0	0	0	0	0	0
MG: 50S ribosomal protein L7Ae OS=Methanosaeta thermophila (strain DSM 6194 / PT) GN=rpl7ae PE=3 SV=1 [A0B601] Score: 165.0	K02936	-	Archaea	Unknown	Euryarchaeota	Methanomicrobia	Unknown	Unknown	Unknown	Unknown	-	4	5	3	3	46	50	40	56	33	23	16	9	18	13	10	5	4	5	0	6	6	6	6	4	2	4	4	2	0	0	0	0	3	3	3	7	0	0
MG: Putative nickel-responsive regulator OS=Methanocella arvoryzae (strain DSM 22066 / NBRC 105507 / MRE50) GN=UNCMA_03340 PE=3 SV=1 [Q0W112] Score: 183.0	K07722	-	Archaea	Unknown	Euryarchaeota	Methanomicrobia	Unknown	Unknown	Unknown	Unknown	-	9	9	1	0	24	30	36	34	23	15	11	12	16	14	25	34	23	19	8	32	5	9	5	3	4	15	6	9	7	0	2	2	0	1	5	4	7	4
MG: Bifunctional enzyme Fae/Hps OS=Methanosarcina barkeri (strain Fusaro / DSM 804) GN=faeB-hpsB PE=1 SV=1 [Q46DY5] Score: 579.0	K13812	4.2.1.147|4.1.2.43	Archaea	Unknown	Euryarchaeota	Methanomicrobia	Unknown	Unknown	Unknown	Unknown	-	63	25	19	14	120	76	73	72	15	6	16	17	16	18	9	8	14	1	7	15	19	27	8	11	3	4	2	0	11	13	6	29	1	3	4	4	11	9
MG: 30S ribosomal protein S7 OS=Methanoregula boonei (strain 6A8) GN=rps7 PE=3 SV=1 [A7I4X5] Score: 281.0	K02992	-	Archaea	Unknown	Euryarchaeota	Methanomicrobia	Unknown	Unknown	Unknown	Unknown	-	9	7	0	0	55	36	16	22	24	16	10	16	55	30	49	43	31	33	24	29	3	3	2	1	67	46	29	27	0	0	4	1	0	0	0	0	0	0
MG: Tyrosine--tRNA ligase OS=Methanoculleus marisnigri (strain ATCC 35101 / DSM 1498 / JR1) GN=tyrS PE=3 SV=1 [A3CYG9] Score: 387.0	K01866	6.1.1.1	Archaea	Unknown	Euryarchaeota	Methanomicrobia	Unknown	Unknown	Unknown	Unknown	-	2	0	0	0	0	0	1	0	0	0	0	0	0	0	0	0	0	0	0	0	0	0	0	0	0	0	0	0	0	0	0	0	0	0	0	0	0	0
MG: 4-hydroxy-tetrahydrodipicolinate reductase OS=Methanoculleus marisnigri (strain ATCC 35101 / DSM 1498 / JR1) GN=dapB PE=3 SV=1 [A3CVI6] Score: 440.0	K00215	1.17.1.8	Archaea	Unknown	Euryarchaeota	Methanomicrobia	Unknown	Unknown	Unknown	Unknown	-	19	7	7	8	11	10	5	5	20	18	9	16	16	35	42	22	37	35	32	11	1	2	0	0	12	11	8	7	27	7	10	10	8	10	5	1	8	3
MG: Translation initiation factor 5A OS=Methanoculleus marisnigri (strain ATCC 35101 / DSM 1498 / JR1) GN=eIF5A PE=3 SV=1 [A3CU49] Score: 221.0	K03263	-	Archaea	Unknown	Euryarchaeota	Methanomicrobia	Unknown	Unknown	Unknown	Unknown	-	0	1	0	0	10	9	9	7	10	15	9	6	0	0	0	0	0	0	0	0	0	0	0	0	0	0	0	0	0	0	0	0	0	0	0	0	0	0
MG: S-adenosylmethionine synthase OS=Methanoregula boonei (strain 6A8) GN=mat PE=3 SV=1 [A7I771] Score: 585.0	K00789	2.5.1.6	Archaea	Unknown	Euryarchaeota	Methanomicrobia	Unknown	Unknown	Unknown	Unknown	-	0	1	0	0	0	0	1	6	0	0	0	0	0	0	0	0	0	1	0	0	0	0	0	0	0	1	0	0	0	0	0	0	0	0	0	0	0	0
MG: 50S ribosomal protein L23P OS=Methanospirillum hungatei JF-1 (strain ATCC 27890 / DSM 864 / NBRC 100397 / JF-1) GN=rpl23p PE=3 SV=1 [Q2FU93] Score: 78.6	K02892	-	Archaea	Unknown	Euryarchaeota	Methanomicrobia	Unknown	Unknown	Unknown	Unknown	-	0	0	0	0	16	19	4	4	1	0	0	0	0	0	0	0	0	0	0	0	1	2	1	2	0	0	0	0	0	0	0	0	0	0	0	0	0	0
AMPPA_METAC AMP phosphorylase OS=Methanosarcina acetivorans (strain ATCC 35395 / DSM 2834 / JCM 12185 / C2A) GN=MA_3242 PE=3 SV=1	K18931	2.4.2.57	Archaea	Unknown	Euryarchaeota	Methanomicrobia	Unknown	Unknown	Unknown	Unknown	-	0	0	0	0	6	3	16	9	7	2	0	0	5	3	4	4	6	5	5	3	0	0	0	0	0	3	4	3	1	0	5	0	0	0	0	5	4	2
MG: 30S ribosomal protein S4 OS=Methanosarcina barkeri (strain Fusaro / DSM 804) GN=rps4 PE=3 SV=1 [Q46GC8] Score: 384.0	K02986	-	Archaea	Unknown	Euryarchaeota	Methanomicrobia	Unknown	Unknown	Unknown	Unknown	-	0	0	0	0	2	0	1	1	0	0	0	0	0	2	4	0	4	0	0	0	0	0	0	0	0	0	0	0	0	0	0	0	0	0	0	0	0	0
MG: Hypoxanthine/guanine phosphoribosyltransferase OS=Methanosarcina barkeri (strain Fusaro / DSM 804) GN=hpt PE=3 SV=1 [Q46C14] Score: 332.0	K00759	2.4.2.8	Archaea	Unknown	Euryarchaeota	Methanomicrobia	Unknown	Unknown	Unknown	Unknown	-	0	0	0	0	4	8	3	2	0	0	1	1	0	2	0	0	1	0	0	1	0	0	0	0	0	0	0	0	0	0	0	0	0	0	1	0	0	0
SUI1_METBF Protein translation factor SUI1 homolog OS=Methanosarcina barkeri (strain Fusaro / DSM 804) GN=Mbar_A0534 PE=3 SV=1	K03113	-	Archaea	Unknown	Euryarchaeota	Methanomicrobia	Unknown	Unknown	Unknown	Unknown	-	0	0	0	0	1	2	3	5	5	6	1	2	0	1	0	0	0	0	0	0	1	3	2	0	3	3	2	4	0	0	0	0	0	0	0	0	0	0
VATF_METAC V-type ATP synthase subunit F OS=Methanosarcina acetivorans (strain ATCC 35395 / DSM 2834 / JCM 12185 / C2A) GN=atpF PE=3 SV=1	K02122	-	Archaea	Unknown	Euryarchaeota	Methanomicrobia	Unknown	Unknown	Unknown	Unknown	-	0	0	0	0	29	51	32	32	38	38	31	42	0	0	0	0	0	0	0	0	0	0	0	0	0	0	0	0	0	0	0	0	4	4	16	5	0	0
MG: Isoleucine--tRNA ligase OS=Methanosarcina acetivorans (strain ATCC 35395 / DSM 2834 / JCM 12185 / C2A) GN=ileS PE=3 SV=1 [Q8TN62] Score: 570.0	K01870	6.1.1.5	Archaea	Unknown	Euryarchaeota	Methanomicrobia	Unknown	Unknown	Unknown	Unknown	-	0	0	0	0	0	0	0	1	0	0	0	0	0	0	0	0	0	0	0	0	0	0	0	0	0	0	0	0	0	0	0	0	0	0	0	0	0	0
MG: Phenylalanine--tRNA ligase alpha subunit OS=Methanosarcina mazei (strain ATCC BAA-159 / DSM 3647 / Goe1 / Go1 / JCM 11833 / OCM 88) GN=pheS PE=3 SV=1 [Q8PWV6] Score: 528.0	K01889	6.1.1.20	Archaea	Unknown	Euryarchaeota	Methanomicrobia	Unknown	Unknown	Unknown	Unknown	-	0	0	0	0	0	0	0	0	0	0	0	0	2	0	0	0	0	0	0	0	0	0	0	0	0	0	0	0	0	0	0	0	0	0	1	0	0	0
HIS6_METBU Imidazole glycerol phosphate synthase subunit HisF OS=Methanococcoides burtonii (strain DSM 6242 / NBRC 107633 / OCM 468 / ACE-M) GN=hisF PE=3 SV=1	K02500	4.1.3.-	Archaea	Unknown	Euryarchaeota	Methanomicrobia	Unknown	Unknown	Unknown	Unknown	-	0	0	0	0	0	0	0	0	0	0	0	0	0	0	0	0	0	0	0	0	1	0	0	0	0	0	0	0	0	0	0	0	0	0	0	0	0	0
RL29_METBF 50S ribosomal protein L29P OS=Methanosarcina barkeri (strain Fusaro / DSM 804) GN=rpl29p PE=3 SV=1	K02904	-	Archaea	Unknown	Euryarchaeota	Methanomicrobia	Unknown	Unknown	Unknown	Unknown	-	0	0	0	0	5	0	0	0	0	0	0	0	0	0	0	0	0	0	0	0	0	0	0	0	0	5	3	3	0	0	0	0	0	0	0	0	0	0
MG: Lysine--tRNA ligase 2 OS=Methanosarcina mazei (strain ATCC BAA-159 / DSM 3647 / Goe1 / Go1 / JCM 11833 / OCM 88) GN=lysS2 PE=3 SV=1 [Q8PVP6] Score: 619.0	K04567	6.1.1.6	Archaea	Unknown	Euryarchaeota	Methanomicrobia	Unknown	Unknown	Unknown	Unknown	-	0	0	0	0	0	0	1	1	0	0	0	0	0	0	0	0	0	0	0	0	0	0	0	0	1	4	6	2	2	1	5	2	1	1	1	0	1	3
MG: Glutamate-1-semialdehyde 2,1-aminomutase OS=Methanoculleus marisnigri (strain ATCC 35101 / DSM 1498 / JR1) GN=hemL PE=3 SV=1 [A3CU65] Score: 751.0	K01845	5.4.3.8	Archaea	Unknown	Euryarchaeota	Methanomicrobia	Unknown	Unknown	Unknown	Unknown	-	3	2	0	0	1	0	5	2	1	1	0	0	0	0	0	0	0	0	0	0	0	0	0	0	0	0	0	0	0	0	0	0	0	0	0	0	0	0
MG: Phosphoribosylamine--glycine ligase OS=Methanococcoides burtonii (strain DSM 6242 / NBRC 107633 / OCM 468 / ACE-M) GN=purD PE=3 SV=1 [Q12X37] Score: 594.0	K01945	6.3.4.13	Archaea	Unknown	Euryarchaeota	Methanomicrobia	Unknown	Unknown	Unknown	Unknown	-	0	0	0	0	0	0	2	0	0	0	0	0	2	2	2	0	0	0	0	0	0	0	0	0	0	0	0	0	0	0	0	0	0	0	0	0	0	0
MG: AMP phosphorylase OS=Methanoculleus marisnigri (strain ATCC 35101 / DSM 1498 / JR1) GN=Memar_0551 PE=3 SV=1 [A3CSY4] Score: 61.6	K18931	2.4.2.57	Archaea	Unknown	Euryarchaeota	Methanomicrobia	Unknown	Unknown	Unknown	Unknown	-	0	0	0	0	0	0	0	0	0	0	0	0	0	0	0	0	0	0	0	0	0	0	0	0	0	0	0	0	0	0	2	0	0	0	0	0	0	0
MG: Aspartyl/glutamyl-tRNA(Asn/Gln) amidotransferase subunit B OS=Methanospirillum hungatei JF-1 (strain ATCC 27890 / DSM 864 / NBRC 100397 / JF-1) GN=gatB PE=3 SV=1 [Q2FQM1] Score: 536.0	K02434	6.3.5.-	Archaea	Unknown	Euryarchaeota	Methanomicrobia	Unknown	Unknown	Unknown	Unknown	-	0	0	0	0	0	0	2	0	0	0	0	0	0	0	0	0	0	0	0	0	0	0	0	0	0	0	0	0	0	0	0	0	0	0	0	0	0	0
GATB_METAC Aspartyl/glutamyl-tRNA(Asn/Gln) amidotransferase subunit B OS=Methanosarcina acetivorans (strain ATCC 35395 / DSM 2834 / JCM 12185 / C2A) GN=gatB PE=3 SV=1	K02434	6.3.5.-	Archaea	Unknown	Euryarchaeota	Methanomicrobia	Unknown	Unknown	Unknown	Unknown	-	0	0	0	0	0	0	2	0	0	0	0	0	0	0	0	0	0	0	0	0	0	0	0	0	0	0	0	0	0	0	0	0	0	0	0	0	0	0
MG: Phenylalanine--tRNA ligase alpha subunit OS=Methanocorpusculum labreanum (strain ATCC 43576 / DSM 4855 / Z) GN=pheS PE=3 SV=1 [A2ST81] Score: 644.0	K01889	6.1.1.20	Archaea	Unknown	Euryarchaeota	Methanomicrobia	Unknown	Unknown	Unknown	Unknown	-	0	0	0	0	0	0	0	0	0	0	0	0	2	0	0	0	0	0	0	0	0	0	0	0	0	0	0	0	0	0	0	0	0	0	0	0	0	0
MG: 50S ribosomal protein L29P OS=Methanocella arvoryzae (strain DSM 22066 / NBRC 105507 / MRE50) GN=rpl29p PE=3 SV=1 [Q0W1Y2] Score: 64.3	K02904	-	Archaea	Unknown	Euryarchaeota	Methanomicrobia	Unknown	Unknown	Unknown	Unknown	-	0	0	0	0	0	0	0	0	0	0	0	0	0	0	0	0	0	0	0	0	0	0	0	0	0	1	1	1	0	0	0	0	0	0	0	0	0	0
MG: Putative (R)-citramalate synthase CimA OS=Methanoculleus marisnigri (strain ATCC 35101 / DSM 1498 / JR1) GN=cimA PE=3 SV=1 [A3CUF2] Score: 680.0	K09011	2.3.1.182	Archaea	Unknown	Euryarchaeota	Methanomicrobia	Unknown	Unknown	Unknown	Unknown	-	0	0	0	0	0	0	0	0	0	0	0	0	0	0	0	0	0	0	0	0	0	0	0	0	0	0	0	0	0	0	0	0	0	0	0	0	0	0
MG: Shikimate dehydrogenase (NADP(+)) OS=Methanopyrus kandleri (strain AV19 / DSM 6324 / JCM 9639 / NBRC 100938) GN=aroE PE=3 SV=1 [Q8TZ24] Score: 218.0	K00014	1.1.1.25	Archaea	Unknown	Euryarchaeota	Methanopyri	Methanopyrales	Methanopyraceae	Methanopyrus	Methanopyrus kandleri	-	0	0	0	0	0	0	1	0	0	0	0	0	0	0	0	0	0	0	0	0	0	0	0	0	0	0	0	0	0	0	0	0	0	0	0	0	0	0
MG: Glutamine--fructose-6-phosphate aminotransferase [isomerizing] OS=Methanopyrus kandleri (strain AV19 / DSM 6324 / JCM 9639 / NBRC 100938) GN=glmS PE=3 SV=3 [Q8TZ14] Score: 105.0	K00820	2.6.1.16	Archaea	Unknown	Euryarchaeota	Methanopyri	Methanopyrales	Methanopyraceae	Methanopyrus	Methanopyrus kandleri	-	0	0	0	0	0	0	1	0	0	0	0	0	0	0	0	0	0	0	0	0	0	0	0	0	0	0	0	0	0	0	0	0	0	0	0	0	0	0
MG: Acetyl-CoA decarbonylase/synthase complex subunit delta OS=Methanopyrus kandleri (strain AV19 / DSM 6324 / JCM 9639 / NBRC 100938) GN=cdhD PE=3 SV=1 [Q8TXF2] Score: 198.0	K00194	-	Archaea	Unknown	Euryarchaeota	Methanopyri	Methanopyrales	Methanopyraceae	Methanopyrus	Methanopyrus kandleri	-	0	0	0	0	0	0	0	0	0	0	3	0	0	0	0	0	0	1	0	0	0	0	0	0	0	0	0	0	0	0	0	0	0	0	0	0	0	0
KHSE_METKA Homoserine kinase OS=Methanopyrus kandleri (strain AV19 / DSM 6324 / JCM 9639 / NBRC 100938) GN=thrB PE=3 SV=1	K00872	2.7.1.39	Archaea	Unknown	Euryarchaeota	Methanopyri	Methanopyrales	Methanopyraceae	Methanopyrus	Methanopyrus kandleri	-	0	0	0	0	0	0	0	0	0	0	0	1	0	0	0	0	0	0	0	0	0	0	0	0	0	0	0	0	0	0	0	0	0	0	0	0	0	0
HDRB_METKA no description	K03389	1.8.98.1	Archaea	Unknown	Euryarchaeota	Methanopyri	Methanopyrales	Methanopyraceae	Methanopyrus	Methanopyrus kandleri	-	0	0	0	0	0	0	0	0	0	0	0	0	1	0	0	0	0	1	0	0	0	0	0	0	0	0	0	0	0	0	0	0	0	0	0	0	0	0
AROD_METKA 3-dehydroquinate dehydratase OS=Methanopyrus kandleri (strain AV19 / DSM 6324 / JCM 9639 / NBRC 100938) GN=aroD PE=3 SV=1	K03785	4.2.1.10	Archaea	Unknown	Euryarchaeota	Methanopyri	Methanopyrales	Methanopyraceae	Methanopyrus	Methanopyrus kandleri	-	0	0	0	0	0	0	0	0	0	0	0	0	2	0	0	0	0	0	0	0	0	0	0	0	0	0	0	0	0	0	0	0	0	0	0	0	0	0
MG: DNA double-strand break repair Rad50 ATPase OS=Methanopyrus kandleri (strain AV19 / DSM 6324 / JCM 9639 / NBRC 100938) GN=rad50 PE=3 SV=1 [Q8TXI4] Score: 62.0	K03546	-	Archaea	Unknown	Euryarchaeota	Methanopyri	Methanopyrales	Methanopyraceae	Methanopyrus	Methanopyrus kandleri	-	0	0	0	0	0	0	0	0	0	0	0	0	0	0	0	3	0	0	0	0	0	0	0	0	0	0	0	0	0	0	0	0	0	0	0	0	0	0
MG: Uncharacterized HAD-hydrolase MK0970 OS=Methanopyrus kandleri (strain AV19 / DSM 6324 / JCM 9639 / NBRC 100938) GN=MK0970 PE=3 SV=2 [Q8TWR2] Score: 57.8	K07025	3.1.3.-	Archaea	Unknown	Euryarchaeota	Methanopyri	Methanopyrales	Methanopyraceae	Methanopyrus	Methanopyrus kandleri	-	0	0	0	0	0	0	0	0	0	0	0	0	0	0	0	0	0	0	1	0	0	0	0	0	0	0	0	0	0	0	0	0	0	0	0	0	0	0
MG: Glycerol-1-phosphate dehydrogenase [NAD(P)+] OS=Methanopyrus kandleri (strain AV19 / DSM 6324 / JCM 9639 / NBRC 100938) GN=egsA PE=3 SV=1 [Q8TW08] Score: 182.0	K00096	1.1.1.261	Archaea	Unknown	Euryarchaeota	Methanopyri	Methanopyrales	Methanopyraceae	Methanopyrus	Methanopyrus kandleri	-	0	0	0	0	0	0	0	0	0	0	0	0	0	0	0	0	0	0	0	0	0	0	0	1	0	0	0	0	0	0	0	0	0	0	0	0	0	0
MG: Putative ABC transporter ATP-binding protein MK0182 OS=Methanopyrus kandleri (strain AV19 / DSM 6324 / JCM 9639 / NBRC 100938) GN=MK0182 PE=3 SV=1 [Q8TYV9] Score: 218.0	K02006	3.6.3.-	Archaea	Unknown	Euryarchaeota	Methanopyri	Methanopyrales	Methanopyraceae	Methanopyrus	Methanopyrus kandleri	-	0	0	0	0	0	0	0	0	0	0	0	0	0	0	0	0	0	0	0	0	0	0	0	0	1	1	0	0	0	0	0	0	0	0	0	0	0	0
DNLI_METKA DNA ligase OS=Methanopyrus kandleri (strain AV19 / DSM 6324 / JCM 9639 / NBRC 100938) GN=lig PE=3 SV=1	K10747	6.5.1.1	Archaea	Unknown	Euryarchaeota	Methanopyri	Methanopyrales	Methanopyraceae	Methanopyrus	Methanopyrus kandleri	-	0	0	0	0	0	0	0	0	0	0	0	0	0	0	0	0	0	0	0	0	0	0	0	0	0	0	1	0	0	0	0	0	0	0	0	0	0	0
ACDA2_METKA Putative acetyl-CoA decarbonylase/synthase complex subunit alpha-like OS=Methanopyrus kandleri (strain AV19 / DSM 6324 / JCM 9639 / NBRC 100938) GN=cdhA2 PE=3 SV=1	K00192	-	Archaea	Unknown	Euryarchaeota	Methanopyri	Methanopyrales	Methanopyraceae	Methanopyrus	Methanopyrus kandleri	-	0	0	0	0	0	0	0	0	0	0	0	0	0	0	0	0	0	0	0	0	0	0	0	0	0	0	0	0	0	0	0	1	0	0	0	0	0	0
SURE_METKA 5'-nucleotidase SurE OS=Methanopyrus kandleri (strain AV19 / DSM 6324 / JCM 9639 / NBRC 100938) GN=surE PE=3 SV=1	K03787	3.1.3.5	Archaea	Unknown	Euryarchaeota	Methanopyri	Methanopyrales	Methanopyraceae	Methanopyrus	Methanopyrus kandleri	-	0	0	0	0	0	0	0	0	0	0	0	0	0	0	0	0	0	0	0	0	0	0	0	0	0	0	0	0	0	0	0	0	0	0	0	0	0	0
MG: Uncharacterized protein MTH_1398 OS=Methanothermobacter thermautotrophicus (strain ATCC 29096 / DSM 1053 / JCM 10044 / NBRC 100330 / Delta H) GN=MTH_1398 PE=4 SV=1 [O27449] Score: 144.0	-	-	Archaea	Unknown	Euryarchaeota	Unknown	Unknown	Unknown	Unknown	Unknown	-	4	4	0	0	0	1	0	0	1	0	0	0	0	0	0	0	0	0	0	0	1	0	0	0	1	1	3	2	0	0	0	0	0	0	0	0	0	0
ALBA1_METKA DNA/RNA-binding protein Alba 1 OS=Methanopyrus kandleri (strain AV19 / DSM 6324 / JCM 9639 / NBRC 100938) GN=albA1 PE=3 SV=1	K03622	-	Archaea	Unknown	Euryarchaeota	Unknown	Unknown	Unknown	Unknown	Unknown	-	5	4	2	0	2	0	0	0	0	0	0	0	0	0	0	0	0	0	0	0	4	2	0	0	0	0	0	0	0	0	0	0	0	0	0	0	0	0
MG: Acetate--CoA ligase [ADP-forming] II OS=Archaeoglobus fulgidus (strain ATCC 49558 / VC-16 / DSM 4304 / JCM 9628 / NBRC 100126) GN=AF_1938 PE=1 SV=1 [O28341] Score: 396.0	-	6.2.1.13	Archaea	Unknown	Euryarchaeota	Unknown	Unknown	Unknown	Unknown	Unknown	-	2	1	0	0	0	6	3	0	1	1	0	1	6	11	5	1	9	9	1	7	1	0	0	1	1	4	0	0	0	0	0	0	0	0	0	0	0	0
MG: 5'-deoxyadenosine deaminase OS=Methanobrevibacter smithii (strain PS / ATCC 35061 / DSM 861) GN=dadD PE=3 SV=1 [A5UMN6] Score: 215.0	K12960	3.5.4.41	Archaea	Unknown	Euryarchaeota	Unknown	Unknown	Unknown	Unknown	Unknown	-	2	0	0	0	0	0	0	0	0	2	2	0	0	0	2	0	1	0	0	0	0	0	0	0	0	0	0	0	0	0	0	0	0	0	0	0	0	0
MCH_ARCFU Methenyltetrahydromethanopterin cyclohydrolase OS=Archaeoglobus fulgidus (strain ATCC 49558 / VC-16 / DSM 4304 / JCM 9628 / NBRC 100126) GN=mch PE=1 SV=1	K01499	3.5.4.27	Archaea	Unknown	Euryarchaeota	Unknown	Unknown	Unknown	Unknown	Unknown	-	1	1	0	0	4	2	5	5	2	0	2	0	0	0	0	0	0	0	0	2	0	0	0	0	0	0	0	0	0	0	0	0	0	0	0	0	0	0
MG: L-sulfolactate dehydrogenase OS=Methanocaldococcus jannaschii (strain ATCC 43067 / DSM 2661 / JAL-1 / JCM 10045 / NBRC 100440) GN=comC PE=1 SV=1 [Q58820] Score: 102.0	K05884	1.1.1.337	Archaea	Unknown	Euryarchaeota	Unknown	Unknown	Unknown	Unknown	Unknown	-	4	0	1	1	1	4	3	4	4	9	7	7	15	5	10	15	11	8	6	12	0	0	0	0	4	5	1	1	0	0	1	2	2	2	6	4	2	0
MG: Iron-sulfur flavoprotein MJ1083 OS=Methanocaldococcus jannaschii (strain ATCC 43067 / DSM 2661 / JAL-1 / JCM 10045 / NBRC 100440) GN=MJ1083 PE=1 SV=1 [Q58483] Score: 132.0	-	-	Archaea	Unknown	Euryarchaeota	Unknown	Unknown	Unknown	Unknown	Unknown	-	4	2	0	0	7	5	8	9	6	2	2	0	2	4	2	1	4	2	0	1	8	8	5	2	6	6	6	4	20	16	10	16	2	5	12	3	7	4
MG: 4-hydroxy-tetrahydrodipicolinate synthase OS=Methanoculleus marisnigri (strain ATCC 35101 / DSM 1498 / JR1) GN=dapA PE=3 SV=1 [A3CVI7] Score: 518.0	K01714	4.3.3.7	Archaea	Unknown	Euryarchaeota	Unknown	Unknown	Unknown	Unknown	Unknown	-	36	32	2	0	67	30	54	37	27	48	32	27	15	20	19	8	9	1	0	0	10	12	18	16	39	28	38	32	75	51	44	53	17	23	24	22	79	61
MG: 30S ribosomal protein S2 OS=Methanothermobacter thermautotrophicus (strain ATCC 29096 / DSM 1053 / JCM 10044 / NBRC 100330 / Delta H) GN=rps2 PE=3 SV=1 [O26150] Score: 349.0	K02967	-	Archaea	Unknown	Euryarchaeota	Unknown	Unknown	Unknown	Unknown	Unknown	-	8	3	2	0	5	1	0	0	3	4	3	2	9	12	13	0	7	10	0	4	0	0	0	0	7	9	10	7	0	0	0	0	0	0	0	0	0	0
MG: Methyl-coenzyme M reductase operon protein D OS=Methanosarcina barkeri (strain Fusaro / DSM 804) GN=mcrD PE=4 SV=1 [P07958] Score: 108.0	K03422	-	Archaea	Unknown	Euryarchaeota	Unknown	Unknown	Unknown	Unknown	Unknown	-	2	0	2	0	24	23	9	11	16	9	14	10	25	7	6	19	12	2	6	7	0	0	0	0	6	6	8	5	1	4	4	3	0	0	5	0	7	4
MG: Polyferredoxin protein FwdF OS=Methanocaldococcus jannaschii (strain ATCC 43067 / DSM 2661 / JAL-1 / JCM 10045 / NBRC 100440) GN=fwdF PE=3 SV=1 [Q58566] Score: 71.2	K00205	-	Archaea	Unknown	Euryarchaeota	Unknown	Unknown	Unknown	Unknown	Unknown	-	41	1	8	2	44	44	11	9	5	5	0	0	18	14	3	15	14	18	3	14	0	0	0	0	10	11	4	7	15	16	2	1	0	0	0	0	0	0
MG: Transcription initiation factor IIB OS=Methanoculleus marisnigri (strain ATCC 35101 / DSM 1498 / JR1) GN=tfb PE=3 SV=1 [A3CSQ6] Score: 283.0	K03124	-	Archaea	Unknown	Euryarchaeota	Unknown	Unknown	Unknown	Unknown	Unknown	-	5	1	0	3	9	4	47	47	3	3	0	0	6	8	7	0	10	6	1	2	0	0	0	2	5	22	13	6	3	4	4	9	0	0	1	1	2	0
MG: F420-non-reducing hydrogenase iron-sulfur subunit D OS=Methanothermobacter marburgensis (strain DSM 2133 / 14651 / NBRC 100331 / OCM 82 / Marburg) GN=mvhD PE=1 SV=2 [P60238] Score: 274.0	K14127	1.12.99.-	Archaea	Unknown	Euryarchaeota	Unknown	Unknown	Unknown	Unknown	Unknown	-	16	15	1	1	4	2	10	16	0	0	0	0	0	0	0	0	0	0	0	0	1	0	0	0	1	0	0	0	0	0	3	4	1	1	7	5	0	0
MG: Polyferredoxin protein MvhB OS=Methanothermus fervidus GN=mvhB PE=3 SV=1 [Q49180] Score: 66.2	-	-	Archaea	Unknown	Euryarchaeota	Unknown	Unknown	Unknown	Unknown	Unknown	-	63	56	9	15	56	50	11	15	5	5	0	0	18	19	26	15	14	18	19	14	7	3	10	15	58	60	24	25	18	52	32	20	4	8	5	4	5	0
MG: TATA-box-binding protein OS=Natronomonas pharaonis (strain ATCC 35678 / DSM 2160) GN=tbp PE=3 SV=1 [Q3ITB1] Score: 221.0	K03120	-	Archaea	Unknown	Euryarchaeota	Unknown	Unknown	Unknown	Unknown	Unknown	-	27	16	3	1	44	31	28	34	27	22	28	24	52	44	43	38	58	3	14	53	7	7	6	4	45	9	4	7	3	0	0	33	0	0	14	1	25	14
MG: CoB--CoM heterodisulfide reductase iron-sulfur subunit A OS=Methanothermobacter marburgensis (strain DSM 2133 / 14651 / NBRC 100331 / OCM 82 / Marburg) GN=hdrA PE=1 SV=3 [Q50756] Score: 308.0	-	1.8.98.1	Archaea	Unknown	Euryarchaeota	Unknown	Unknown	Unknown	Unknown	Unknown	-	55	175	28	28	40	21	70	44	12	11	12	8	4	10	7	1	8	5	2	5	0	1	8	15	6	5	13	5	9	15	7	10	4	3	1	2	2	0
MG: Uncharacterized protein MTH_862 OS=Methanothermobacter thermautotrophicus (strain ATCC 29096 / DSM 1053 / JCM 10044 / NBRC 100330 / Delta H) GN=MTH_862 PE=1 SV=1 [O26950] Score: 63.5	-	-	Archaea	Unknown	Euryarchaeota	Unknown	Unknown	Unknown	Unknown	Unknown	-	9	1	0	0	21	14	23	17	25	24	22	20	9	8	9	12	16	0	0	8	0	0	0	0	3	0	0	0	0	0	0	5	0	1	0	0	6	5
MG: Pyruvate synthase subunit PorD OS=Methanosarcina barkeri (strain Fusaro / DSM 804) GN=porD PE=1 SV=2 [P80524] Score: 87.0	K00171	-	Archaea	Unknown	Euryarchaeota	Unknown	Unknown	Unknown	Unknown	Unknown	-	21	18	1	2	16	12	8	21	4	2	1	0	3	0	0	0	1	0	0	0	0	0	0	0	1	2	2	1	0	0	0	0	0	0	0	0	0	0
MG: Pyruvate synthase subunit PorD OS=Methanocaldococcus jannaschii (strain ATCC 43067 / DSM 2661 / JAL-1 / JCM 10045 / NBRC 100440) GN=porD PE=3 SV=1 [Q57716] Score: 87.0	K00171	-	Archaea	Unknown	Euryarchaeota	Unknown	Unknown	Unknown	Unknown	Unknown	-	10	5	0	2	3	2	0	1	2	2	0	0	14	8	11	3	14	6	0	3	0	0	0	0	4	2	2	1	0	0	0	0	0	0	0	0	0	0
MG: Archaeal histone HAN1 subunit A OS=Thermococcus zilligii GN=han1A PE=1 SV=3 [P95669] Score: 71.6	-	-	Archaea	Unknown	Euryarchaeota	Unknown	Unknown	Unknown	Unknown	Unknown	-	8	4	0	0	63	51	20	21	7	20	16	14	3	3	5	2	6	5	0	0	16	16	35	33	18	65	66	57	21	20	21	18	6	4	4	4	16	9
HFO2_METFO Archaeal histone A2 OS=Methanobacterium formicicum GN=hfoA2 PE=1 SV=3	-	-	Archaea	Unknown	Euryarchaeota	Unknown	Unknown	Unknown	Unknown	Unknown	-	2	0	0	0	15	13	5	5	0	0	0	0	0	0	0	0	0	0	0	0	0	0	0	0	0	13	8	5	0	0	0	0	2	0	0	0	0	0
MG: 30S ribosomal protein S19e OS=Archaeoglobus fulgidus (strain ATCC 49558 / VC-16 / DSM 4304 / JCM 9628 / NBRC 100126) GN=rps19e PE=3 SV=1 [O28210] Score: 193.0	K02966	-	Archaea	Unknown	Euryarchaeota	Unknown	Unknown	Unknown	Unknown	Unknown	-	32	9	16	11	52	24	19	30	21	8	9	11	26	25	21	11	19	23	6	7	8	3	0	0	18	12	8	5	1	2	8	3	2	2	3	2	4	2
MG: CoB--CoM heterodisulfide reductase 1 iron-sulfur subunit A OS=Methanosarcina mazei (strain ATCC BAA-159 / DSM 3647 / Goe1 / Go1 / JCM 11833 / OCM 88) GN=hdrA PE=3 SV=1 [Q8Q0T0] Score: 659.0	K03388	1.8.98.1	Archaea	Unknown	Euryarchaeota	Unknown	Unknown	Unknown	Unknown	Unknown	-	25	30	0	0	0	0	21	5	1	1	1	0	0	0	0	0	1	0	0	0	0	1	0	0	0	0	1	1	4	0	0	0	1	0	0	0	1	0
MG: Digeranylgeranylglycerophospholipid reductase OS=Methanoculleus marisnigri (strain ATCC 35101 / DSM 1498 / JR1) GN=Memar_0506 PE=3 SV=1 [A3CST9] Score: 333.0	K17830	1.3.7.11	Archaea	Unknown	Euryarchaeota	Unknown	Unknown	Unknown	Unknown	Unknown	-	1	0	0	0	0	0	2	5	0	0	0	0	1	3	4	0	4	4	0	1	0	0	0	0	1	0	3	1	0	0	0	0	0	0	0	0	3	2
MG: Ribonuclease J OS=Halobacterium salinarum (strain ATCC 700922 / JCM 11081 / NRC-1) GN=rnj PE=3 SV=2 [Q9HQI4] Score: 520.0	K12574	3.1.-.-	Archaea	Unknown	Euryarchaeota	Unknown	Unknown	Unknown	Unknown	Unknown	-	2	1	0	0	0	0	2	0	0	1	0	0	0	0	0	0	0	0	0	0	0	0	0	0	0	0	1	0	0	0	0	0	0	0	0	0	0	0
MCH_METPE Methenyltetrahydromethanopterin cyclohydrolase OS=Methanosphaerula palustris (strain ATCC BAA-1556 / DSM 19958 / E1-9c) GN=mch PE=3 SV=1	K01499	3.5.4.27	Archaea	Unknown	Euryarchaeota	Unknown	Unknown	Unknown	Unknown	Unknown	-	36	18	3	3	20	18	13	13	7	8	11	5	9	3	5	1	8	10	1	2	9	8	5	6	9	5	4	4	0	0	1	1	0	0	5	4	0	0
MG: F420-dependent NADP reductase OS=Methanocaldococcus jannaschii (strain ATCC 43067 / DSM 2661 / JAL-1 / JCM 10045 / NBRC 100440) GN=fno PE=3 SV=1 [Q58896] Score: 99.4	K06988	1.5.1.40	Archaea	Unknown	Euryarchaeota	Unknown	Unknown	Unknown	Unknown	Unknown	-	1	3	0	0	3	2	2	2	0	0	0	0	0	0	0	0	0	0	0	0	0	0	0	0	0	0	0	0	0	0	0	0	0	0	0	0	0	0
MG: DNA polymerase sliding clamp OS=Methanoculleus marisnigri (strain ATCC 35101 / DSM 1498 / JR1) GN=pcn PE=3 SV=1 [A3CVJ2] Score: 456.0	K04802	-	Archaea	Unknown	Euryarchaeota	Unknown	Unknown	Unknown	Unknown	Unknown	-	1	0	0	1	6	4	5	3	13	9	10	5	19	14	28	12	17	21	10	17	0	0	0	0	7	6	3	6	9	3	4	4	0	1	1	0	6	8
MG: Indolepyruvate oxidoreductase subunit IorB OS=Pyrococcus horikoshii (strain ATCC 700860 / DSM 12428 / JCM 9974 / NBRC 100139 / OT-3) GN=iorB PE=3 SV=1 [O58496] Score: 130.0	K00180	1.2.7.8	Archaea	Unknown	Euryarchaeota	Unknown	Unknown	Unknown	Unknown	Unknown	-	3	1	0	0	92	103	71	67	62	40	39	48	29	31	18	7	11	12	9	20	45	46	17	31	109	69	58	38	11	13	8	8	22	20	44	21	2	7
MG: CoB--CoM heterodisulfide reductase iron-sulfur subunit C OS=Methanothermobacter marburgensis (strain DSM 2133 / 14651 / NBRC 100331 / OCM 82 / Marburg) GN=hdrC PE=1 SV=6 [Q50754] Score: 92.0	K03390	1.8.98.1	Archaea	Unknown	Euryarchaeota	Unknown	Unknown	Unknown	Unknown	Unknown	-	99	73	10	11	3	4	7	5	0	1	0	0	39	37	44	29	50	20	3	28	0	0	21	14	14	18	15	5	3	1	2	7	1	1	0	2	0	0
MG: Iron-sulfur flavoprotein AF_1436 OS=Archaeoglobus fulgidus (strain ATCC 49558 / VC-16 / DSM 4304 / JCM 9628 / NBRC 100126) GN=AF_1436 PE=3 SV=1 [O28836] Score: 73.9	-	-	Archaea	Unknown	Euryarchaeota	Unknown	Unknown	Unknown	Unknown	Unknown	-	1	0	0	0	6	6	30	25	36	32	8	12	6	6	14	13	10	11	0	6	0	0	0	0	3	4	2	2	8	4	2	4	2	2	0	0	1	0
HMT1_METTH DNA-binding protein HMt-1.1 OS=Methanothermobacter thermautotrophicus (strain ATCC 29096 / DSM 1053 / JCM 10044 / NBRC 100330 / Delta H) GN=hmtA1 PE=3 SV=2	-	-	Archaea	Unknown	Euryarchaeota	Unknown	Unknown	Unknown	Unknown	Unknown	-	14	5	0	0	102	128	51	49	36	19	34	22	2	1	3	2	4	3	1	0	15	17	28	33	15	39	30	29	9	9	13	18	21	15	16	20	5	2
MG: 30S ribosomal protein S11 OS=Methanoculleus marisnigri (strain ATCC 35101 / DSM 1498 / JR1) GN=rps11 PE=3 SV=1 [A3CWH8] Score: 127.0	K02948	-	Archaea	Unknown	Euryarchaeota	Unknown	Unknown	Unknown	Unknown	Unknown	-	11	9	5	4	66	45	31	33	8	7	7	6	0	0	0	0	3	1	0	0	4	1	5	4	0	0	0	0	2	5	5	4	3	4	8	11	0	0
MG: UPF0047 protein MTH_771 OS=Methanothermobacter thermautotrophicus (strain ATCC 29096 / DSM 1053 / JCM 10044 / NBRC 100330 / Delta H) GN=MTH_771 PE=3 SV=1 [O26865] Score: 161.0	-	-	Archaea	Unknown	Euryarchaeota	Unknown	Unknown	Unknown	Unknown	Unknown	-	1	0	0	0	4	1	5	6	2	5	1	1	4	3	7	2	6	7	3	6	0	0	0	0	0	0	0	0	0	0	0	0	0	0	0	0	0	0
MG: Putative branched-chain-amino-acid aminotransferase OS=Archaeoglobus fulgidus (strain ATCC 49558 / VC-16 / DSM 4304 / JCM 9628 / NBRC 100126) GN=ilvE PE=3 SV=1 [O29329] Score: 292.0	K00826	2.6.1.42	Archaea	Unknown	Euryarchaeota	Unknown	Unknown	Unknown	Unknown	Unknown	-	12	13	2	0	9	6	16	11	9	8	9	14	34	26	19	15	27	24	19	7	6	7	7	6	20	18	15	12	15	12	7	20	8	8	8	5	16	11
MG: DNA/RNA-binding protein Alba OS=Methanosphaera stadtmanae (strain ATCC 43021 / DSM 3091 / JCM 11832 / MCB-3) GN=albA PE=3 SV=1 [Q2NHL8] Score: 148.0	K03622	-	Archaea	Unknown	Euryarchaeota	Unknown	Unknown	Unknown	Unknown	Unknown	-	5	4	2	0	2	0	0	0	0	0	0	0	0	0	0	0	0	0	0	0	4	2	0	0	0	0	0	0	0	0	0	0	0	0	0	0	0	0
ACDA1_METMA Acetyl-CoA decarbonylase/synthase complex subunit alpha 1 OS=Methanosarcina mazei (strain ATCC BAA-159 / DSM 3647 / Goe1 / Go1 / JCM 11833 / OCM 88) GN=cdhA1 PE=1 SV=3	K00192	1.2.99.2	Archaea	Unknown	Euryarchaeota	Unknown	Unknown	Unknown	Unknown	Unknown	-	0	2	1	5	0	0	46	64	99	125	29	22	0	0	0	0	0	0	0	0	24	38	65	58	0	0	0	0	0	0	0	0	23	30	39	36	0	0
MG: Acetyl-CoA decarbonylase/synthase complex subunit gamma 1 OS=Methanosarcina mazei (strain ATCC BAA-159 / DSM 3647 / Goe1 / Go1 / JCM 11833 / OCM 88) GN=cdhE1 PE=3 SV=1 [Q8PZ09] Score: 861.0	K00197	2.1.1.245	Archaea	Unknown	Euryarchaeota	Unknown	Unknown	Unknown	Unknown	Unknown	-	0	1	40	30	129	125	346	259	194	262	161	83	0	0	0	0	0	0	0	0	49	84	71	75	0	0	0	0	0	0	0	0	94	130	112	97	0	0
IF2G_THEVO Translation initiation factor 2 subunit gamma OS=Thermoplasma volcanium (strain ATCC 51530 / DSM 4299 / JCM 9571 / NBRC 15438 / GSS1) GN=eif2g PE=3 SV=1	K03242	-	Archaea	Unknown	Euryarchaeota	Unknown	Unknown	Unknown	Unknown	Unknown	-	0	1	0	0	1	0	2	1	0	0	0	1	0	0	3	0	1	0	0	0	0	0	0	0	0	2	0	0	1	0	0	0	0	0	1	0	0	0
MG: 8-hydroxy-5-deazaflavin:NADPH oxidoreductase OS=Archaeoglobus fulgidus (strain ATCC 49558 / VC-16 / DSM 4304 / JCM 9628 / NBRC 100126) GN=AF_0892 PE=1 SV=1 [O29370] Score: 150.0	K06988	1.5.1.40	Archaea	Unknown	Euryarchaeota	Unknown	Unknown	Unknown	Unknown	Unknown	-	0	2	0	0	11	5	0	3	7	5	3	0	0	0	0	0	0	0	0	0	0	0	0	0	9	6	9	2	2	2	0	1	0	1	6	3	0	0
ACDB2_METAC Acetyl-CoA decarbonylase/synthase complex subunit beta 2 OS=Methanosarcina acetivorans (strain ATCC 35395 / DSM 2834 / JCM 12185 / C2A) GN=cdhC2 PE=3 SV=1	K00193	2.3.1.169	Archaea	Unknown	Euryarchaeota	Unknown	Unknown	Unknown	Unknown	Unknown	-	0	0	34	13	162	169	310	304	314	375	176	211	0	0	0	0	0	0	0	0	138	171	148	129	0	0	0	0	0	0	0	0	119	115	150	133	2	0
RS5_METMA 30S ribosomal protein S5 OS=Methanosarcina mazei (strain ATCC BAA-159 / DSM 3647 / Goe1 / Go1 / JCM 11833 / OCM 88) GN=rps5 PE=3 SV=1	K02988	-	Archaea	Unknown	Euryarchaeota	Unknown	Unknown	Unknown	Unknown	Unknown	-	0	0	0	2	11	10	6	2	0	0	0	0	7	8	5	3	7	5	0	0	0	0	0	0	17	16	7	7	0	0	0	0	0	0	0	0	0	0
MG: Elongation factor 1-beta OS=Methanosarcina acetivorans (strain ATCC 35395 / DSM 2834 / JCM 12185 / C2A) GN=ef1b PE=3 SV=1 [Q8TQR9] Score: 164.0	K03232	-	Archaea	Unknown	Euryarchaeota	Unknown	Unknown	Unknown	Unknown	Unknown	-	0	0	0	0	5	6	5	5	3	2	2	3	0	0	0	0	0	0	1	0	0	0	0	0	0	0	0	0	0	0	0	0	0	0	1	0	0	0
MG: 30S ribosomal protein S28e OS=Methanosarcina mazei (strain ATCC BAA-159 / DSM 3647 / Goe1 / Go1 / JCM 11833 / OCM 88) GN=rps28e PE=3 SV=1 [Q8PU75] Score: 77.0	K02979	-	Archaea	Unknown	Euryarchaeota	Unknown	Unknown	Unknown	Unknown	Unknown	-	0	0	0	0	23	21	36	35	4	0	0	0	9	4	3	4	2	0	0	0	8	6	6	7	0	2	1	0	0	0	0	0	2	2	8	4	0	0
MG: Dihydroneopterin aldolase OS=Methanocaldococcus jannaschii (strain ATCC 43067 / DSM 2661 / JAL-1 / JCM 10045 / NBRC 100440) GN=mptD PE=1 SV=1 [Q57851] Score: 86.3	K09739	4.1.2.25	Archaea	Unknown	Euryarchaeota	Unknown	Unknown	Unknown	Unknown	Unknown	-	0	0	0	0	3	2	2	1	1	1	0	1	2	0	0	0	0	0	0	0	0	0	0	0	1	0	0	0	0	0	1	1	0	1	0	0	0	0
MG: DNA-directed RNA polymerase subunit K OS=Methanosarcina mazei (strain ATCC BAA-159 / DSM 3647 / Goe1 / Go1 / JCM 11833 / OCM 88) GN=rpoK PE=3 SV=1 [Q8PW42] Score: 147.0	K03055	2.7.7.6	Archaea	Unknown	Euryarchaeota	Unknown	Unknown	Unknown	Unknown	Unknown	-	0	0	0	0	1	4	2	5	2	0	2	0	5	6	8	5	5	4	0	6	1	0	1	0	0	0	1	1	0	0	0	0	0	0	0	0	0	0
MG: Adenylosuccinate synthetase OS=Archaeoglobus fulgidus (strain ATCC 49558 / VC-16 / DSM 4304 / JCM 9628 / NBRC 100126) GN=purA PE=3 SV=1 [O29417] Score: 475.0	K01939	6.3.4.4	Archaea	Unknown	Euryarchaeota	Unknown	Unknown	Unknown	Unknown	Unknown	-	0	0	0	0	7	7	14	15	51	37	5	30	36	33	25	25	22	23	30	33	0	0	0	0	2	2	4	10	6	7	6	4	0	0	1	0	5	5
MG: Argininosuccinate synthase OS=Methanococcus maripaludis (strain S2 / LL) GN=argG PE=3 SV=1 [P61527] Score: 233.0	K01940	6.3.4.5	Archaea	Unknown	Euryarchaeota	Unknown	Unknown	Unknown	Unknown	Unknown	-	0	0	0	0	4	6	4	1	0	0	0	0	0	0	0	0	0	0	0	0	0	0	0	0	0	0	0	0	0	0	0	0	0	0	0	2	0	0
ENO_METMA Enolase OS=Methanosarcina mazei (strain ATCC BAA-159 / DSM 3647 / Goe1 / Go1 / JCM 11833 / OCM 88) GN=eno PE=3 SV=1	K01689	4.2.1.11	Archaea	Unknown	Euryarchaeota	Unknown	Unknown	Unknown	Unknown	Unknown	-	0	0	0	0	34	42	54	40	9	16	18	28	0	0	0	0	0	0	0	0	4	16	6	5	0	0	0	0	0	0	0	0	1	0	0	0	0	0
MG: Ribose 1,5-bisphosphate isomerase OS=Archaeoglobus fulgidus (strain ATCC 49558 / VC-16 / DSM 4304 / JCM 9628 / NBRC 100126) GN=AF_2037 PE=3 SV=1 [O28242] Score: 271.0	K18237	5.3.1.29	Archaea	Unknown	Euryarchaeota	Unknown	Unknown	Unknown	Unknown	Unknown	-	0	0	0	0	2	0	2	0	0	0	1	1	0	0	4	0	2	4	0	0	0	0	0	0	0	0	0	0	0	0	0	0	0	0	0	0	0	0
MG: Ribose 1,5-bisphosphate isomerase OS=Methanocaldococcus jannaschii (strain ATCC 43067 / DSM 2661 / JAL-1 / JCM 10045 / NBRC 100440) GN=MJ0122 PE=3 SV=1 [Q57586] Score: 338.0	K18237	5.3.1.29	Archaea	Unknown	Euryarchaeota	Unknown	Unknown	Unknown	Unknown	Unknown	-	0	0	0	0	3	3	6	3	3	0	1	0	4	1	4	0	4	4	1	0	0	0	0	0	0	0	0	0	0	0	0	0	0	0	0	0	0	0
MG: CRISPR type III-associated RAMP protein Csm3 OS=Methanothermobacter thermautotrophicus (strain ATCC 29096 / DSM 1053 / JCM 10044 / NBRC 100330 / Delta H) GN=csm3 PE=3 SV=1 [O27152] Score: 126.0	K09002	-	Archaea	Unknown	Euryarchaeota	Unknown	Unknown	Unknown	Unknown	Unknown	-	0	0	0	0	1	2	4	5	1	1	0	0	2	1	2	0	2	1	1	0	5	2	4	1	0	0	0	0	0	0	0	0	0	0	0	0	0	0
MG: Iron-sulfur flavoprotein MJ0731 OS=Methanocaldococcus jannaschii (strain ATCC 43067 / DSM 2661 / JAL-1 / JCM 10045 / NBRC 100440) GN=MJ0731 PE=3 SV=1 [Q58141] Score: 260.0	-	-	Archaea	Unknown	Euryarchaeota	Unknown	Unknown	Unknown	Unknown	Unknown	-	0	0	0	0	5	10	4	3	3	1	2	2	0	0	0	0	0	0	0	0	0	0	0	0	0	0	0	0	0	0	0	0	0	0	0	0	0	0
MG: Uncharacterized protein AF_1796 OS=Archaeoglobus fulgidus (strain ATCC 49558 / VC-16 / DSM 4304 / JCM 9628 / NBRC 100126) GN=AF_1796 PE=1 SV=1 [O28478] Score: 169.0	K08094	-	Archaea	Unknown	Euryarchaeota	Unknown	Unknown	Unknown	Unknown	Unknown	-	0	0	0	0	3	2	7	2	4	1	1	0	0	0	0	0	0	0	0	0	0	0	0	0	0	0	0	0	0	0	0	0	0	0	1	0	0	0
MG: UPF0098 protein MTH_273 OS=Methanothermobacter thermautotrophicus (strain ATCC 29096 / DSM 1053 / JCM 10044 / NBRC 100330 / Delta H) GN=MTH_273 PE=3 SV=1 [O26373] Score: 189.0	K06910	-	Archaea	Unknown	Euryarchaeota	Unknown	Unknown	Unknown	Unknown	Unknown	-	0	0	0	0	5	3	1	1	0	0	0	0	0	0	0	0	0	0	0	0	0	0	0	1	0	0	0	0	0	0	0	0	0	0	0	0	0	0
MG: Nascent polypeptide-associated complex protein OS=Methanosarcina acetivorans (strain ATCC 35395 / DSM 2834 / JCM 12185 / C2A) GN=nac PE=3 SV=1 [Q8TSA1] Score: 205.0	K03626	-	Archaea	Unknown	Euryarchaeota	Unknown	Unknown	Unknown	Unknown	Unknown	-	0	0	0	0	4	8	6	13	2	7	3	4	0	0	0	0	1	0	0	0	0	0	0	0	0	0	0	0	0	0	0	0	0	0	0	0	0	0
MG: 50S ribosomal protein L6 OS=Methanosaeta thermophila (strain DSM 6194 / PT) GN=rpl6 PE=3 SV=1 [A0B9V4] Score: 129.0	K02933	-	Archaea	Unknown	Euryarchaeota	Unknown	Unknown	Unknown	Unknown	Unknown	-	0	0	0	0	4	3	1	1	1	1	0	0	7	4	3	1	3	0	0	0	1	1	0	0	0	0	0	0	0	0	0	0	0	0	1	0	0	0
MG: 50S ribosomal protein L12 OS=Methanothermobacter thermautotrophicus (strain ATCC 29096 / DSM 1053 / JCM 10044 / NBRC 100330 / Delta H) GN=rpl12 PE=1 SV=2 [P05394] Score: 95.5	K02869	-	Archaea	Unknown	Euryarchaeota	Unknown	Unknown	Unknown	Unknown	Unknown	-	0	0	0	0	23	25	21	15	13	19	9	19	0	0	0	0	0	0	0	0	1	2	1	3	0	0	0	0	0	0	0	0	4	1	8	6	0	0
MG: Probable S-adenosyl-L-methionine-binding protein PYRAB06630 OS=Pyrococcus abyssi (strain GE5 / Orsay) GN=PYRAB06630 PE=3 SV=1 [Q9V0X6] Score: 171.0	-	-	Archaea	Unknown	Euryarchaeota	Unknown	Unknown	Unknown	Unknown	Unknown	-	0	0	0	0	2	0	0	1	0	0	0	0	0	0	0	0	2	1	0	0	0	0	0	0	0	0	0	0	0	0	0	0	0	0	0	0	0	0
MG: 2-oxoglutarate synthase subunit KorC OS=Methanocaldococcus jannaschii (strain ATCC 43067 / DSM 2661 / JAL-1 / JCM 10045 / NBRC 100440) GN=korC PE=3 SV=1 [Q57956] Score: 175.0	K00177	1.2.7.3	Archaea	Unknown	Euryarchaeota	Unknown	Unknown	Unknown	Unknown	Unknown	-	0	0	0	0	9	13	2	0	5	3	5	5	18	12	22	12	15	32	5	10	0	0	0	0	13	6	7	7	0	0	0	0	12	12	10	5	0	0
MG: 50S ribosomal protein L6 OS=Methanothermobacter thermautotrophicus (strain ATCC 29096 / DSM 1053 / JCM 10044 / NBRC 100330 / Delta H) GN=rpl6 PE=3 SV=1 [O26127] Score: 262.0	K02933	-	Archaea	Unknown	Euryarchaeota	Unknown	Unknown	Unknown	Unknown	Unknown	-	0	0	0	0	62	28	25	39	10	6	4	9	0	0	0	0	0	5	0	0	0	0	0	0	0	0	0	0	0	0	0	0	2	3	4	3	0	0
MG: Indolepyruvate oxidoreductase subunit IorB OS=Methanothermobacter marburgensis (strain DSM 2133 / 14651 / NBRC 100331 / OCM 82 / Marburg) GN=iorB PE=1 SV=2 [P80911] Score: 124.0	K00180	1.2.7.8	Archaea	Unknown	Euryarchaeota	Unknown	Unknown	Unknown	Unknown	Unknown	-	0	0	0	0	26	23	13	19	2	1	4	1	0	0	0	0	0	0	0	0	16	4	4	8	2	2	1	0	1	0	0	0	0	1	2	1	0	0
LEUC_METTH Probable 3-isopropylmalate dehydratase large subunit OS=Methanothermobacter thermautotrophicus (strain ATCC 29096 / DSM 1053 / JCM 10044 / NBRC 100330 / Delta H) GN=leuC PE=3 SV=1	K01703	4.2.1.33	Archaea	Unknown	Euryarchaeota	Unknown	Unknown	Unknown	Unknown	Unknown	-	0	0	0	0	1	0	6	2	0	2	0	1	1	1	0	0	1	0	0	6	0	1	1	1	0	0	1	0	1	0	0	0	0	0	1	0	0	1
MG: Indolepyruvate oxidoreductase subunit IorB OS=Archaeoglobus fulgidus (strain ATCC 49558 / VC-16 / DSM 4304 / JCM 9628 / NBRC 100126) GN=iorB PE=3 SV=1 [O28249] Score: 100.0	K00180	1.2.7.8	Archaea	Unknown	Euryarchaeota	Unknown	Unknown	Unknown	Unknown	Unknown	-	0	0	0	0	2	3	1	2	2	3	0	2	0	0	0	0	0	0	0	0	0	0	0	0	0	0	0	0	0	0	0	0	0	0	0	1	0	0
TBP_METJA TATA-box-binding protein OS=Methanocaldococcus jannaschii (strain ATCC 43067 / DSM 2661 / JAL-1 / JCM 10045 / NBRC 100440) GN=tbp PE=1 SV=1	K03120	-	Archaea	Unknown	Euryarchaeota	Unknown	Unknown	Unknown	Unknown	Unknown	-	0	0	0	0	0	1	2	3	3	1	2	2	6	7	4	3	6	0	0	8	0	0	0	0	4	1	0	0	0	0	0	3	0	0	0	0	1	0
MG: Geranylfarnesyl diphosphate synthase OS=Natronomonas pharaonis (strain ATCC 35678 / DSM 2160) GN=idsA3 PE=1 SV=1 [Q3IPL1] Score: 250.0	K13787	2.5.1.81	Archaea	Unknown	Euryarchaeota	Unknown	Unknown	Unknown	Unknown	Unknown	-	0	0	0	0	0	0	1	0	1	0	2	0	0	1	2	0	0	1	1	0	0	0	0	0	0	0	0	0	0	0	0	0	0	0	0	0	0	0
MG: Uncharacterized protein MJ1554 OS=Methanocaldococcus jannaschii (strain ATCC 43067 / DSM 2661 / JAL-1 / JCM 10045 / NBRC 100440) GN=MJ1554 PE=3 SV=1 [Q58949] Score: 185.0	-	-	Archaea	Unknown	Euryarchaeota	Unknown	Unknown	Unknown	Unknown	Unknown	-	0	0	0	0	0	0	1	0	0	0	0	0	2	0	1	0	0	0	0	0	0	0	1	0	0	0	0	0	0	0	0	0	0	0	0	0	0	0
MG: Glutamyl-tRNA(Gln) amidotransferase subunit E OS=Archaeoglobus fulgidus (strain ATCC 49558 / VC-16 / DSM 4304 / JCM 9628 / NBRC 100126) GN=gatE PE=3 SV=1 [O28832] Score: 670.0	K03330	6.3.5.-	Archaea	Unknown	Euryarchaeota	Unknown	Unknown	Unknown	Unknown	Unknown	-	0	0	0	0	0	0	17	10	6	1	1	2	0	0	0	0	0	0	0	1	0	0	0	0	0	0	0	0	0	0	0	0	0	0	0	0	0	0
MG: Aspartate--tRNA(Asp/Asn) ligase OS=Methanocaldococcus jannaschii (strain ATCC 43067 / DSM 2661 / JAL-1 / JCM 10045 / NBRC 100440) GN=aspS PE=3 SV=1 [Q58950] Score: 523.0	K01876	6.1.1.23	Archaea	Unknown	Euryarchaeota	Unknown	Unknown	Unknown	Unknown	Unknown	-	0	0	0	0	0	0	2	0	0	0	0	0	0	1	3	0	0	0	0	0	0	0	0	0	0	0	0	0	0	0	0	0	0	0	0	0	0	1
MG: 3-isopropylmalate dehydrogenase OS=Methanothermobacter thermautotrophicus (strain ATCC 29096 / DSM 1053 / JCM 10044 / NBRC 100330 / Delta H) GN=leuB PE=3 SV=1 [O27441] Score: 255.0	-	1.1.1.85	Archaea	Unknown	Euryarchaeota	Unknown	Unknown	Unknown	Unknown	Unknown	-	0	0	0	0	0	0	1	1	0	0	0	0	2	0	1	0	0	0	0	0	0	0	0	0	0	0	0	0	0	0	0	0	0	0	0	0	0	0
MG: 5-formaminoimidazole-4-carboxamide-1-(beta)-D-ribofuranosyl 5'-monophosphate synthetase OS=Methanocaldococcus jannaschii (strain ATCC 43067 / DSM 2661 / JAL-1 / JCM 10045 / NBRC 100440) GN=purP PE=1 SV=1 [Q57600] Score: 265.0	K06863	6.3.4.23	Archaea	Unknown	Euryarchaeota	Unknown	Unknown	Unknown	Unknown	Unknown	-	0	0	0	0	0	0	1	1	0	0	0	0	0	0	0	0	0	0	0	0	0	0	0	0	0	0	0	0	0	0	0	0	0	0	0	0	0	0
TBP_METTL TATA-box-binding protein OS=Methanothermococcus thermolithotrophicus GN=tbp PE=3 SV=1	-	-	Archaea	Unknown	Euryarchaeota	Unknown	Unknown	Unknown	Unknown	Unknown	-	0	0	0	0	0	0	2	3	3	1	2	2	7	9	6	3	10	1	1	8	0	0	0	0	7	4	2	1	0	0	0	3	0	0	0	0	0	0
MG: Glycine--tRNA ligase OS=Thermococcus gammatolerans (strain DSM 15229 / JCM 11827 / EJ3) GN=glyS PE=3 SV=1 [C5A1H0] Score: 546.0	K01880	6.1.1.14	Archaea	Unknown	Euryarchaeota	Unknown	Unknown	Unknown	Unknown	Unknown	-	0	0	0	0	0	0	2	4	2	0	1	1	0	0	0	0	0	0	0	0	0	0	0	0	0	0	0	0	0	0	0	0	0	0	0	0	0	0
LEU1_METMA Probable 2-isopropylmalate synthase OS=Methanosarcina mazei (strain ATCC BAA-159 / DSM 3647 / Goe1 / Go1 / JCM 11833 / OCM 88) GN=leuA PE=3 SV=1	K01649	2.3.3.13	Archaea	Unknown	Euryarchaeota	Unknown	Unknown	Unknown	Unknown	Unknown	-	0	0	0	0	0	0	6	6	9	6	0	0	0	1	12	0	0	0	0	5	0	0	0	0	0	0	0	0	0	0	0	0	0	0	0	0	0	0
MG: Uncharacterized protein AF_0817 OS=Archaeoglobus fulgidus (strain ATCC 49558 / VC-16 / DSM 4304 / JCM 9628 / NBRC 100126) GN=AF_0817 PE=3 SV=1 [O29441] Score: 122.0	-	-	Archaea	Unknown	Euryarchaeota	Unknown	Unknown	Unknown	Unknown	Unknown	-	0	0	0	0	0	0	1	0	0	0	0	0	0	0	0	0	0	0	0	0	0	0	0	0	0	0	0	0	0	0	0	0	0	0	0	0	0	0
MG: S-adenosyl-L-methionine-binding protein AF_0241 OS=Archaeoglobus fulgidus (strain ATCC 49558 / VC-16 / DSM 4304 / JCM 9628 / NBRC 100126) GN=AF_0241 PE=1 SV=1 [O29998] Score: 90.5	-	-	Archaea	Unknown	Euryarchaeota	Unknown	Unknown	Unknown	Unknown	Unknown	-	0	0	0	0	0	0	0	1	0	0	0	0	0	0	0	0	0	0	0	0	0	0	0	0	0	0	0	0	0	0	0	0	0	0	0	0	0	0
MG: Methionine--tRNA ligase OS=Methanococcus maripaludis (strain C7 / ATCC BAA-1331) GN=metG PE=3 SV=1 [A6VIW5] Score: 536.0	K01874	6.1.1.10	Archaea	Unknown	Euryarchaeota	Unknown	Unknown	Unknown	Unknown	Unknown	-	0	0	0	0	0	0	0	0	2	0	0	0	0	0	0	0	0	0	0	0	0	0	0	0	0	0	0	0	0	0	0	0	0	0	0	0	0	0
VATB_METVS V-type ATP synthase beta chain OS=Methanococcus vannielii (strain SB / ATCC 35089 / DSM 1224) GN=atpB PE=3 SV=1	K02118	-	Archaea	Unknown	Euryarchaeota	Unknown	Unknown	Unknown	Unknown	Unknown	-	0	0	0	0	0	0	0	0	2	4	2	0	0	0	0	0	2	0	0	0	0	0	0	0	1	0	0	0	0	0	2	0	1	0	0	0	0	0
CIMA_METTH Putative (R)-citramalate synthase CimA OS=Methanothermobacter thermautotrophicus (strain ATCC 29096 / DSM 1053 / JCM 10044 / NBRC 100330 / Delta H) GN=cimA PE=3 SV=1	K09011	2.3.1.182	Archaea	Unknown	Euryarchaeota	Unknown	Unknown	Unknown	Unknown	Unknown	-	0	0	0	0	0	0	0	0	2	2	1	0	0	0	0	0	0	0	0	0	0	0	0	0	0	0	0	0	0	0	0	0	0	0	0	0	0	0
MG: Protein Mbar_A1807 OS=Methanosarcina barkeri (strain Fusaro / DSM 804) GN=Mbar_A1807 PE=3 SV=1 [Q46BJ4] Score: 358.0	K09141	-	Archaea	Unknown	Euryarchaeota	Unknown	Unknown	Unknown	Unknown	Unknown	-	0	0	0	0	0	0	0	0	2	1	1	0	0	0	1	0	0	0	0	0	0	0	0	0	0	0	0	0	0	0	0	0	0	0	0	0	0	0
MG: Short chain isoprenyl diphosphate synthase OS=Methanocaldococcus jannaschii (strain ATCC 43067 / DSM 2661 / JAL-1 / JCM 10045 / NBRC 100440) GN=idsA PE=3 SV=1 [Q58270] Score: 224.0	K13787	2.5.1.-	Archaea	Unknown	Euryarchaeota	Unknown	Unknown	Unknown	Unknown	Unknown	-	0	0	0	0	0	0	0	0	0	0	1	0	0	0	0	0	0	0	0	0	0	0	0	0	0	0	0	0	0	0	0	0	0	0	0	0	0	0
PCNA_NATPD DNA polymerase sliding clamp OS=Natronomonas pharaonis (strain ATCC 35678 / DSM 2160) GN=pcn PE=3 SV=1	K04802	-	Archaea	Unknown	Euryarchaeota	Unknown	Unknown	Unknown	Unknown	Unknown	-	0	0	0	0	0	0	0	0	0	0	1	0	0	0	0	0	0	0	0	0	0	1	0	0	0	0	0	0	0	0	0	0	0	0	0	0	0	0
MG: Adenylosuccinate lyase OS=Pyrococcus abyssi (strain GE5 / Orsay) GN=purB PE=3 SV=1 [Q9UZ99] Score: 243.0	K01756	4.3.2.2	Archaea	Unknown	Euryarchaeota	Unknown	Unknown	Unknown	Unknown	Unknown	-	0	0	0	0	0	0	0	0	0	0	1	0	21	24	58	44	24	26	18	33	0	1	0	0	0	0	0	0	0	0	0	0	0	0	0	1	0	0
MG: Glycine--tRNA ligase OS=Methanococcus maripaludis (strain S2 / LL) GN=glyS PE=3 SV=1 [Q6M0Q7] Score: 542.0	K01880	6.1.1.14	Archaea	Unknown	Euryarchaeota	Unknown	Unknown	Unknown	Unknown	Unknown	-	0	0	0	0	0	0	0	0	0	0	2	0	0	0	0	0	0	0	0	0	0	0	0	0	0	0	0	0	0	0	0	0	0	0	0	1	0	1
MG: Trk system potassium uptake protein TrkA homolog OS=Methanocaldococcus jannaschii (strain ATCC 43067 / DSM 2661 / JAL-1 / JCM 10045 / NBRC 100440) GN=trkA PE=1 SV=1 [Q58505] Score: 106.0	K03499	-	Archaea	Unknown	Euryarchaeota	Unknown	Unknown	Unknown	Unknown	Unknown	-	0	0	0	0	0	0	0	0	0	0	0	0	1	0	2	0	0	0	0	0	0	0	0	0	0	0	0	0	0	3	0	0	0	0	1	0	0	0
SYP_META3 Proline--tRNA ligase OS=Methanococcus aeolicus (strain Nankai-3 / ATCC BAA-1280) GN=proS PE=3 SV=1	K01881	6.1.1.15	Archaea	Unknown	Euryarchaeota	Unknown	Unknown	Unknown	Unknown	Unknown	-	0	0	0	0	0	0	0	0	0	0	0	0	2	0	1	0	1	2	1	1	0	0	0	0	0	0	0	0	0	0	0	0	0	0	0	0	0	0
MG: CRISPR type III-associated RAMP protein Csm3 OS=Methanocaldococcus jannaschii (strain ATCC 43067 / DSM 2661 / JAL-1 / JCM 10045 / NBRC 100440) GN=csm3 PE=1 SV=1 [Q59063] Score: 162.0	K09002	-	Archaea	Unknown	Euryarchaeota	Unknown	Unknown	Unknown	Unknown	Unknown	-	0	0	0	0	0	0	0	0	0	0	0	0	20	18	22	16	14	14	23	16	0	0	0	0	0	0	0	0	0	0	0	0	0	0	0	0	0	0
MG: Proteasome-activating nucleotidase OS=Archaeoglobus fulgidus (strain ATCC 49558 / VC-16 / DSM 4304 / JCM 9628 / NBRC 100126) GN=pan PE=1 SV=1 [O28303] Score: 511.0	K03420	-	Archaea	Unknown	Euryarchaeota	Unknown	Unknown	Unknown	Unknown	Unknown	-	0	0	0	0	0	0	0	0	0	0	0	0	2	0	4	1	2	2	0	0	0	0	0	0	0	0	0	0	0	0	0	0	0	0	0	0	0	0
MG: Threonine synthase OS=Methanosarcina acetivorans (strain ATCC 35395 / DSM 2834 / JCM 12185 / C2A) GN=thrC PE=1 SV=1 [Q8TQD4] Score: 365.0	K01733	4.2.3.1	Archaea	Unknown	Euryarchaeota	Unknown	Unknown	Unknown	Unknown	Unknown	-	0	0	0	0	0	0	0	0	0	0	0	0	1	0	0	0	0	1	0	0	0	0	0	0	0	0	0	0	0	0	0	0	0	0	0	0	0	0
MG: 2-oxoglutarate synthase subunit KorB OS=Methanocaldococcus jannaschii (strain ATCC 43067 / DSM 2661 / JAL-1 / JCM 10045 / NBRC 100440) GN=korB PE=4 SV=1 [Q57957] Score: 309.0	K00175	1.2.7.3	Archaea	Unknown	Euryarchaeota	Unknown	Unknown	Unknown	Unknown	Unknown	-	0	0	0	0	0	0	0	0	0	0	0	0	0	3	2	0	3	2	0	0	0	0	0	0	2	0	0	2	0	0	0	0	1	0	1	1	0	0
MG: tRNA-splicing ligase RtcB OS=Methanococcus maripaludis (strain S2 / LL) GN=rtcB PE=3 SV=1 [Q6LXF9] Score: 567.0	K14415	6.5.1.-	Archaea	Unknown	Euryarchaeota	Unknown	Unknown	Unknown	Unknown	Unknown	-	0	0	0	0	0	0	0	0	0	0	0	0	0	0	8	4	3	6	0	1	0	0	0	0	0	0	0	0	0	0	0	0	0	0	0	0	0	0
MG: Protein TON_1965 OS=Thermococcus onnurineus (strain NA1) GN=TON_1965 PE=3 SV=1 [B6YW91] Score: 166.0	K09141	-	Archaea	Unknown	Euryarchaeota	Unknown	Unknown	Unknown	Unknown	Unknown	-	0	0	0	0	0	0	0	0	0	0	0	0	0	0	1	0	1	4	0	1	0	0	0	0	0	0	0	0	0	0	0	0	0	0	0	0	0	0
MG: Trk system potassium uptake protein TrkA homolog OS=Archaeoglobus fulgidus (strain ATCC 49558 / VC-16 / DSM 4304 / JCM 9628 / NBRC 100126) GN=trkA PE=3 SV=1 [O29420] Score: 45.1	K03499	-	Archaea	Unknown	Euryarchaeota	Unknown	Unknown	Unknown	Unknown	Unknown	-	0	0	0	0	0	0	0	0	0	0	0	0	0	0	2	0	0	0	0	0	0	0	0	0	1	0	0	0	0	0	0	0	0	0	0	0	0	0
MG: 4-hydroxy-tetrahydrodipicolinate reductase OS=Methanocaldococcus jannaschii (strain ATCC 43067 / DSM 2661 / JAL-1 / JCM 10045 / NBRC 100440) GN=dapB PE=3 SV=2 [Q57865] Score: 164.0	K00215	1.17.1.8	Archaea	Unknown	Euryarchaeota	Unknown	Unknown	Unknown	Unknown	Unknown	-	0	0	0	0	0	0	0	0	0	0	0	0	0	0	0	0	1	0	0	0	0	0	0	0	0	0	0	0	0	0	0	0	0	0	0	0	0	0
MG: CoB--CoM heterodisulfide reductase iron-sulfur subunit A 1 OS=Methanopyrus kandleri (strain AV19 / DSM 6324 / JCM 9639 / NBRC 100938) GN=hdrA1 PE=3 SV=3 [Q8TYP4] Score: 174.0	K03388	1.8.98.1	Archaea	Unknown	Euryarchaeota	Unknown	Unknown	Unknown	Unknown	Unknown	-	0	0	0	0	0	0	0	0	0	0	0	0	0	0	0	0	0	0	1	0	0	0	0	0	0	0	0	0	0	0	0	0	0	0	0	0	0	0
ARLY_METVS Argininosuccinate lyase OS=Methanococcus vannielii (strain SB / ATCC 35089 / DSM 1224) GN=argH PE=3 SV=1	K01755	4.3.2.1	Archaea	Unknown	Euryarchaeota	Unknown	Unknown	Unknown	Unknown	Unknown	-	0	0	0	0	0	0	0	0	0	0	0	0	0	0	0	0	0	0	1	0	0	0	0	0	0	0	0	0	0	0	0	0	0	0	0	0	0	0
MG: Acetyl-CoA decarbonylase/synthase complex subunit alpha OS=Methanosaeta concilii GN=cdhA PE=1 SV=1 [P26692] Score: 558.0	-	1.2.99.2	Archaea	Unknown	Euryarchaeota	Unknown	Unknown	Unknown	Unknown	Unknown	-	0	0	0	0	0	0	0	0	0	0	0	0	0	0	0	0	0	0	0	0	63	116	115	140	0	0	0	0	0	0	0	0	0	0	0	0	0	0
MG: Lysyl aminopeptidase OS=Pyrococcus furiosus (strain ATCC 43587 / DSM 3638 / JCM 8422 / Vc1) GN=PF1861 PE=1 SV=1 [Q8TZW4] Score: 228.0	K01179	3.4.11.15	Archaea	Unknown	Euryarchaeota	Unknown	Unknown	Unknown	Unknown	Unknown	-	0	0	0	0	0	0	0	0	0	0	0	0	0	0	0	0	0	0	0	0	0	0	0	0	0	1	0	0	0	0	0	1	0	0	1	0	0	0
MG: Uncharacterized protein MTH_1421 OS=Methanothermobacter thermautotrophicus (strain ATCC 29096 / DSM 1053 / JCM 10044 / NBRC 100330 / Delta H) GN=MTH_1421 PE=4 SV=1 [O27472] Score: 148.0	K09123	-	Archaea	Unknown	Euryarchaeota	Unknown	Unknown	Unknown	Unknown	Unknown	-	0	0	0	0	0	0	0	0	0	0	0	0	0	0	0	0	0	0	0	0	0	0	0	0	0	0	0	0	0	1	0	0	0	0	0	0	0	0
PORB_METJA Pyruvate synthase subunit PorB OS=Methanocaldococcus jannaschii (strain ATCC 43067 / DSM 2661 / JAL-1 / JCM 10045 / NBRC 100440) GN=porB PE=3 SV=3	K00170	1.2.7.1	Archaea	Unknown	Euryarchaeota	Unknown	Unknown	Unknown	Unknown	Unknown	-	0	0	0	0	0	0	0	0	0	0	0	0	0	0	0	0	0	0	0	0	0	0	0	0	0	0	0	0	0	0	1	0	0	0	0	0	0	0
ACDA1_ARCFU Acetyl-CoA decarbonylase/synthase complex subunit alpha 1 OS=Archaeoglobus fulgidus (strain ATCC 49558 / VC-16 / DSM 4304 / JCM 9628 / NBRC 100126) GN=cdhA1 PE=3 SV=1	K00192	1.2.99.2	Archaea	Unknown	Euryarchaeota	Unknown	Unknown	Unknown	Unknown	Unknown	-	0	0	0	0	0	0	0	0	0	0	0	0	0	0	0	0	0	0	0	0	0	0	0	0	0	0	0	0	0	0	0	0	0	0	0	0	0	0
MG: Uncharacterized protein MJ1313 OS=Methanocaldococcus jannaschii (strain ATCC 43067 / DSM 2661 / JAL-1 / JCM 10045 / NBRC 100440) GN=MJ1313 PE=4 SV=1 [Q58709] Score: 163.0	K09123	-	Archaea	Unknown	Euryarchaeota	Unknown	Unknown	Unknown	Unknown	Unknown	-	0	0	0	0	0	0	0	0	0	0	0	0	0	0	0	0	0	0	0	0	0	0	0	0	0	0	0	0	0	0	0	0	0	0	0	0	0	0
MG: 5,10-methylenetetrahydromethanopterin reductase OS=Methanothermobacter thermautotrophicus (strain ATCC 29096 / DSM 1053 / JCM 10044 / NBRC 100330 / Delta H) GN=mer PE=1 SV=1 [O27784] Score: 639.0	K00320	1.5.98.2	Archaea	Unknown	Euryarchaeota	Unknown	Unknown	Unknown	Unknown	Unknown	-	289	155	17	2	57	32	33	85	28	30	18	17	0	0	0	0	0	0	0	204	98	108	803	790	0	0	0	0	57	64	78	70	52	54	36	35	14	45
MG: 30S ribosomal protein S19e OS=Pyrococcus horikoshii (strain ATCC 700860 / DSM 12428 / JCM 9974 / NBRC 100139 / OT-3) GN=rps19e PE=3 SV=1 [O59041] Score: 189.0	K02966	-	Archaea	Unknown	Euryarchaeota	Unknown	Unknown	Unknown	Unknown	Unknown	-	2	0	4	0	0	0	0	0	2	1	2	0	3	0	0	0	0	0	0	0	0	0	0	0	0	1	0	0	0	0	0	0	0	0	0	0	0	0
MG: Malate dehydrogenase OS=Pyrococcus horikoshii (strain ATCC 700860 / DSM 12428 / JCM 9974 / NBRC 100139 / OT-3) GN=mdh PE=1 SV=1 [O59028] Score: 286.0	-	1.1.1.37	Archaea	Unknown	Euryarchaeota	Unknown	Unknown	Unknown	Unknown	Unknown	-	7	6	2	0	18	21	8	7	21	17	28	34	80	21	36	52	48	38	25	35	0	0	0	0	11	18	3	5	0	0	3	2	12	3	13	4	3	0
MG: 3-isopropylmalate dehydratase small subunit OS=Methanothermobacter thermautotrophicus (strain ATCC 29096 / DSM 1053 / JCM 10044 / NBRC 100330 / Delta H) GN=leuD PE=3 SV=1 [O27440] Score: 142.0	-	4.2.1.33	Archaea	Unknown	Euryarchaeota	Unknown	Unknown	Unknown	Unknown	Unknown	-	3	5	0	0	40	32	22	30	39	38	7	6	0	0	0	1	3	0	0	0	1	1	0	1	8	1	0	0	0	0	0	0	0	0	3	0	0	0
ACDA1_METAC Acetyl-CoA decarbonylase/synthase complex subunit alpha 1 OS=Methanosarcina acetivorans (strain ATCC 35395 / DSM 2834 / JCM 12185 / C2A) GN=cdhA1 PE=3 SV=1	K00192	1.2.7.4	Archaea	Unknown	Euryarchaeota	Unknown	Unknown	Unknown	Unknown	Unknown	-	0	2	47	16	113	103	557	496	551	579	178	172	0	0	0	0	0	0	0	0	85	122	169	162	0	0	0	0	0	0	0	0	131	115	141	161	0	0
MG: Argininosuccinate synthase OS=Methanosarcina barkeri (strain Fusaro / DSM 804) GN=argG PE=3 SV=1 [Q469Z8] Score: 299.0	K01940	6.3.4.5	Archaea	Unknown	Euryarchaeota	Unknown	Unknown	Unknown	Unknown	Unknown	-	0	0	0	0	4	6	4	1	3	1	0	0	0	1	0	0	1	1	0	0	0	0	0	0	0	0	0	0	0	0	0	0	1	0	0	2	0	0
MG: Geranylgeranylglyceryl phosphate synthase OS=Methanosarcina barkeri (strain Fusaro / DSM 804) GN=Mbar_A0675 PE=3 SV=1 [Q46EN8] Score: 467.0	K17104	2.5.1.41	Archaea	Unknown	Euryarchaeota	Unknown	Unknown	Unknown	Unknown	Unknown	-	0	0	0	0	2	2	4	6	2	2	1	0	0	0	0	0	0	0	0	0	0	0	0	0	0	0	0	0	0	0	0	0	0	0	0	0	0	0
MG: TATA-box-binding protein 1 OS=Methanosarcina acetivorans (strain ATCC 35395 / DSM 2834 / JCM 12185 / C2A) GN=tbp1 PE=3 SV=1 [Q8TI26] Score: 365.0	K03120	-	Archaea	Unknown	Euryarchaeota	Unknown	Unknown	Unknown	Unknown	Unknown	-	0	0	0	0	18	13	34	34	5	7	2	1	0	0	0	0	0	0	0	0	0	0	0	0	0	0	0	0	0	0	0	0	0	0	0	0	0	0
GCSPA_THEKO Probable glycine dehydrogenase (decarboxylating) subunit 1 OS=Thermococcus kodakaraensis (strain ATCC BAA-918 / JCM 12380 / KOD1) GN=gcvPA PE=3 SV=1	K00282	1.4.4.2	Archaea	Unknown	Euryarchaeota	Unknown	Unknown	Unknown	Unknown	Unknown	-	8	5	0	0	0	0	3	2	1	2	4	3	38	21	44	32	39	40	32	20	0	0	0	0	0	0	0	0	0	0	0	0	0	0	0	0	0	0
GCSPA_THEON Probable glycine dehydrogenase (decarboxylating) subunit 1 OS=Thermococcus onnurineus (strain NA1) GN=gcvPA PE=3 SV=1	K00282	1.4.4.2	Archaea	Unknown	Euryarchaeota	Unknown	Unknown	Unknown	Unknown	Unknown	-	8	5	0	0	0	0	3	2	1	2	4	3	38	21	44	32	39	40	32	20	0	0	0	0	0	0	0	0	0	0	0	1	0	0	0	0	0	0
MCH_METJA Methenyltetrahydromethanopterin cyclohydrolase OS=Methanocaldococcus jannaschii (strain ATCC 43067 / DSM 2661 / JAL-1 / JCM 10045 / NBRC 100440) GN=mch PE=3 SV=1	K01499	3.5.4.27	Archaea	Unknown	Euryarchaeota	Unknown	Unknown	Unknown	Unknown	Unknown	-	1	1	0	0	1	0	0	0	0	0	2	0	0	0	0	0	0	0	0	2	0	0	0	0	0	0	0	0	0	0	0	0	0	0	0	0	0	0
FAEHP_UNCMA Bifunctional enzyme Fae/Hps OS=Uncultured methanogenic archaeon RC-I GN=fae-hps PE=3 SV=1	K13812	4.2.1.147|4.1.2.43	Archaea	Unknown	Euryarchaeota	Unknown	Unknown	Unknown	Unknown	Unknown	-	5	4	2	0	9	8	2	3	5	4	5	3	3	2	3	1	1	0	0	0	0	1	0	0	1	1	1	0	0	1	1	1	0	1	0	0	8	5
MG: 50S ribosomal protein L7Ae OS=Methanothermobacter thermautotrophicus (strain ATCC 29096 / DSM 1053 / JCM 10044 / NBRC 100330 / Delta H) GN=rpl7ae PE=3 SV=2 [O26355] Score: 122.0	K02936	-	Archaea	Unknown	Euryarchaeota	Unknown	Unknown	Unknown	Unknown	Unknown	-	0	0	0	0	0	1	3	3	0	0	0	0	0	0	0	0	0	0	0	0	4	2	2	0	0	0	0	0	2	2	0	2	2	1	2	2	0	1
MG: TATA-box-binding protein OS=Methanosphaera stadtmanae (strain ATCC 43021 / DSM 3091 / JCM 11832 / MCB-3) GN=tbp PE=3 SV=1 [Q2NFC3] Score: 153.0	K03120	-	Archaea	Unknown	Euryarchaeota	Unknown	Unknown	Unknown	Unknown	Unknown	-	0	0	0	0	0	0	0	0	0	0	0	0	0	0	0	0	3	0	0	0	0	0	0	0	0	4	0	0	0	0	0	0	0	0	0	0	0	0
MG: CoB--CoM heterodisulfide reductase iron-sulfur subunit A OS=Methanocaldococcus jannaschii (strain ATCC 43067 / DSM 2661 / JAL-1 / JCM 10045 / NBRC 100440) GN=hdrA PE=3 SV=2 [P60200] Score: 173.0	-	1.8.98.1	Archaea	Unknown	Euryarchaeota	Unknown	Unknown	Unknown	Unknown	Unknown	-	22	31	2	0	24	7	3	70	30	22	1	0	0	0	15	1	3	4	0	0	17	12	0	7	5	17	17	6	103	74	37	33	6	9	34	30	35	30
RFCS_NATPD Replication factor C small subunit OS=Natronomonas pharaonis (strain ATCC 35678 / DSM 2160) GN=rfcS PE=3 SV=1	K04801	-	Archaea	Unknown	Euryarchaeota	Unknown	Unknown	Unknown	Unknown	Unknown	-	0	0	0	0	0	0	0	2	0	0	0	0	0	0	2	0	0	0	0	0	0	0	0	0	1	0	0	0	0	0	0	0	0	0	0	0	0	0
MG: O-phosphoserine--tRNA(Cys) ligase OS=Methanosphaerula palustris (strain ATCC BAA-1556 / DSM 19958 / E1-9c) GN=sepS PE=3 SV=1 [B8GJL9] Score: 815.0	K07587	6.1.1.27	Archaea	Unknown	Euryarchaeota	Unknown	Unknown	Unknown	Unknown	Unknown	-	0	0	0	0	0	0	0	2	2	1	0	0	1	0	0	0	0	0	0	0	0	0	0	0	0	0	0	0	0	0	0	0	0	0	0	0	1	0
MG: Threonylcarbamoyl-AMP synthase OS=Pyrococcus abyssi (strain GE5 / Orsay) GN=sua5 PE=1 SV=1 [Q9UYB2] Score: 127.0	K07566	2.7.7.87	Archaea	Unknown	Euryarchaeota	Thermococci	Thermococcales	Thermococcaceae	Pyrococcus	Pyrococcus abyssi	-	0	0	1	0	0	0	0	1	0	0	0	0	3	1	0	0	0	0	0	0	2	0	0	1	1	2	1	2	5	4	5	7	1	3	3	1	8	2
UPPS_PYRAB Tritrans,polycis-undecaprenyl-diphosphate synthase (geranylgeranyl-diphosphate specific) OS=Pyrococcus abyssi (strain GE5 / Orsay) GN=uppS PE=3 SV=1	K15888	2.5.1.89	Archaea	Unknown	Euryarchaeota	Thermococci	Thermococcales	Thermococcaceae	Pyrococcus	Pyrococcus abyssi	-	0	0	0	1	0	0	0	0	0	0	0	0	0	0	0	0	0	0	0	0	0	0	0	0	0	0	0	0	0	0	0	0	0	0	0	0	0	0
MG: Putative GTPase PYRAB02490 OS=Pyrococcus abyssi (strain GE5 / Orsay) GN=PYRAB02490 PE=3 SV=1 [Q9V225] Score: 308.0	K07588	3.6.-.-	Archaea	Unknown	Euryarchaeota	Thermococci	Thermococcales	Thermococcaceae	Pyrococcus	Pyrococcus abyssi	-	0	0	0	0	3	0	0	0	0	0	0	0	0	0	0	0	0	0	0	0	0	0	0	0	0	0	0	1	0	0	0	0	0	0	0	0	0	0
MG: Uncharacterized protein PYRAB12460 OS=Pyrococcus abyssi (strain GE5 / Orsay) GN=PYRAB12460 PE=3 SV=1 [Q9UZA8] Score: 62.0	-	-	Archaea	Unknown	Euryarchaeota	Thermococci	Thermococcales	Thermococcaceae	Pyrococcus	Pyrococcus abyssi	-	0	0	0	0	2	1	3	1	0	0	0	0	0	0	0	0	0	0	0	0	0	0	0	0	0	0	0	0	0	0	0	0	0	0	0	0	0	0
MG: Nucleoside diphosphate kinase OS=Pyrococcus abyssi (strain GE5 / Orsay) GN=ndk PE=3 SV=2 [Q9UZ13] Score: 106.0	K00940	2.7.4.6	Archaea	Unknown	Euryarchaeota	Thermococci	Thermococcales	Thermococcaceae	Pyrococcus	Pyrococcus abyssi	-	0	0	0	0	0	3	7	6	0	0	0	0	0	0	0	0	0	0	0	0	0	0	0	0	0	0	0	0	0	0	0	0	0	0	0	0	0	0
MG: 3-hydroxy-3-methylglutaryl-coenzyme A reductase OS=Pyrococcus abyssi (strain GE5 / Orsay) GN=hmgA PE=3 SV=2 [Q9V1R3] Score: 447.0	K00021	1.1.1.34	Archaea	Unknown	Euryarchaeota	Thermococci	Thermococcales	Thermococcaceae	Pyrococcus	Pyrococcus abyssi	-	0	0	0	0	0	0	0	0	1	1	0	0	0	0	0	0	0	0	0	0	0	0	0	0	0	0	0	0	0	0	0	0	0	0	0	0	0	0
THIL_PYRAB Thiamine-monophosphate kinase OS=Pyrococcus abyssi (strain GE5 / Orsay) GN=thiL PE=3 SV=1	K00946	2.7.4.16	Archaea	Unknown	Euryarchaeota	Thermococci	Thermococcales	Thermococcaceae	Pyrococcus	Pyrococcus abyssi	-	0	0	0	0	0	0	0	0	0	1	0	0	0	0	0	0	0	0	0	0	0	0	0	0	0	0	0	0	0	0	0	0	0	0	0	0	0	0
MG: Dihydroorotate dehydrogenase B (NAD(+)), catalytic subunit OS=Pyrococcus abyssi (strain GE5 / Orsay) GN=pyrD PE=3 SV=2 [Q9V0Y6] Score: 168.0	K17828	1.3.1.14	Archaea	Unknown	Euryarchaeota	Thermococci	Thermococcales	Thermococcaceae	Pyrococcus	Pyrococcus abyssi	-	0	0	0	0	0	0	0	0	0	0	0	2	4	8	16	7	12	22	4	6	0	0	0	0	0	0	0	0	0	0	0	0	0	2	1	1	0	0
MG: Pyrrolidone-carboxylate peptidase OS=Pyrococcus abyssi (strain GE5 / Orsay) GN=pcp PE=3 SV=1 [Q9UYQ9] Score: 231.0	K01304	3.4.19.3	Archaea	Unknown	Euryarchaeota	Thermococci	Thermococcales	Thermococcaceae	Pyrococcus	Pyrococcus abyssi	-	0	0	0	0	0	0	0	0	0	0	0	0	2	0	2	0	1	0	0	0	0	0	0	0	0	0	0	0	0	0	0	0	0	0	0	0	0	0
MG: Thymidylate synthase ThyX OS=Pyrococcus abyssi (strain GE5 / Orsay) GN=thyX PE=3 SV=1 [Q9UZ51] Score: 94.7	K03465	2.1.1.148	Archaea	Unknown	Euryarchaeota	Thermococci	Thermococcales	Thermococcaceae	Pyrococcus	Pyrococcus abyssi	-	0	0	0	0	0	0	0	0	0	0	0	0	0	0	1	0	0	0	0	0	0	0	0	0	0	0	0	0	0	0	0	0	0	0	0	0	0	0
MG: Uncharacterized protein PYRAB14350 OS=Pyrococcus abyssi (strain GE5 / Orsay) GN=PYRAB14350 PE=3 SV=1 [Q9UYS2] Score: 89.0	-	-	Archaea	Unknown	Euryarchaeota	Thermococci	Thermococcales	Thermococcaceae	Pyrococcus	Pyrococcus abyssi	-	0	0	0	0	0	0	0	0	0	0	0	0	0	0	1	0	0	0	0	0	0	0	0	0	0	0	0	0	0	0	0	0	0	0	0	0	0	0
TRPD_PYRAB Anthranilate phosphoribosyltransferase OS=Pyrococcus abyssi (strain GE5 / Orsay) GN=trpD PE=3 SV=1	K00766	2.4.2.18	Archaea	Unknown	Euryarchaeota	Thermococci	Thermococcales	Thermococcaceae	Pyrococcus	Pyrococcus abyssi	-	0	0	0	0	0	0	0	0	0	0	0	0	0	0	0	3	0	0	0	0	0	0	0	0	0	0	0	0	0	0	0	0	0	0	0	0	0	0
MG: Ribulose bisphosphate carboxylase OS=Pyrococcus abyssi (strain GE5 / Orsay) GN=rbcL PE=3 SV=1 [Q9UZD7] Score: 496.0	K01601	4.1.1.39	Archaea	Unknown	Euryarchaeota	Thermococci	Thermococcales	Thermococcaceae	Pyrococcus	Pyrococcus abyssi	-	0	0	0	0	0	0	0	0	0	0	0	0	0	0	0	1	0	0	0	0	0	0	0	0	0	0	0	0	0	0	0	0	0	0	0	0	0	0
MG: Ketoisovalerate oxidoreductase subunit VorB OS=Pyrococcus abyssi (strain GE5 / Orsay) GN=vorB PE=3 SV=1 [Q9UYZ2] Score: 278.0	K00187	1.2.7.7	Archaea	Unknown	Euryarchaeota	Thermococci	Thermococcales	Thermococcaceae	Pyrococcus	Pyrococcus abyssi	-	0	0	0	0	0	0	0	0	0	0	0	0	0	0	0	0	1	1	0	0	0	0	0	0	0	0	0	0	0	0	0	0	0	0	0	0	0	0
MG: Putative ABC transporter ATP-binding protein PYRAB03730 OS=Pyrococcus abyssi (strain GE5 / Orsay) GN=PYRAB03730 PE=3 SV=1 [Q9V1Q4] Score: 155.0	K16786	3.6.3.-	Archaea	Unknown	Euryarchaeota	Thermococci	Thermococcales	Thermococcaceae	Pyrococcus	Pyrococcus abyssi	-	0	0	0	0	0	0	0	0	0	0	0	0	0	0	0	0	0	0	1	0	0	0	0	0	0	0	0	0	0	0	0	0	0	0	0	0	0	0
FLAB5_PYRAB Flagellin B5 OS=Pyrococcus abyssi (strain GE5 / Orsay) GN=flaB5 PE=3 SV=1	K07325	-	Archaea	Unknown	Euryarchaeota	Thermococci	Thermococcales	Thermococcaceae	Pyrococcus	Pyrococcus abyssi	-	0	0	0	0	0	0	0	0	0	0	0	0	0	0	0	0	0	0	0	0	0	0	0	0	0	0	0	0	0	0	0	1	0	0	0	0	0	0
AROA_PYRAB 3-phosphoshikimate 1-carboxyvinyltransferase OS=Pyrococcus abyssi (strain GE5 / Orsay) GN=aroA PE=3 SV=1	K00800	2.5.1.19	Archaea	Unknown	Euryarchaeota	Thermococci	Thermococcales	Thermococcaceae	Pyrococcus	Pyrococcus abyssi	-	0	0	0	0	0	0	0	0	0	0	0	0	0	0	0	0	0	0	0	0	0	0	0	0	0	0	0	0	0	0	0	0	0	0	0	0	0	0
MG: KEOPS complex subunit Pcc1 OS=Pyrococcus abyssi (strain GE5 / Orsay) GN=pcc1 PE=1 SV=2 [Q9V1Z9] Score: 44.7	K09741	-	Archaea	Unknown	Euryarchaeota	Thermococci	Thermococcales	Thermococcaceae	Pyrococcus	Pyrococcus abyssi	-	0	0	0	0	0	0	0	0	0	0	0	0	0	0	0	0	0	0	0	0	0	0	0	0	0	0	0	0	0	0	0	0	0	0	0	0	0	0
MG: Glutamyl-tRNA(Gln) amidotransferase subunit D OS=Pyrococcus furiosus (strain ATCC 43587 / DSM 3638 / JCM 8422 / Vc1) GN=gatD PE=3 SV=1 [Q8U0X0] Score: 439.0	K09482	6.3.5.-	Archaea	Unknown	Euryarchaeota	Thermococci	Thermococcales	Thermococcaceae	Pyrococcus	Pyrococcus furiosus	-	0	1	0	0	0	0	0	0	0	0	0	0	0	0	0	0	0	0	0	0	0	0	0	0	0	0	0	0	0	0	0	0	0	0	0	0	0	0
MG: Protein-export membrane protein SecD OS=Pyrococcus furiosus (strain ATCC 43587 / DSM 3638 / JCM 8422 / Vc1) GN=secD PE=3 SV=1 [Q8U4B4] Score: 357.0	K03072	-	Archaea	Unknown	Euryarchaeota	Thermococci	Thermococcales	Thermococcaceae	Pyrococcus	Pyrococcus furiosus	-	0	0	1	0	0	0	0	0	0	0	0	0	0	0	0	0	0	0	0	0	0	0	0	0	0	0	0	0	0	0	0	0	0	0	0	0	0	0
[truncated: 15,891 more rows]
[truncated: 6 more columns]
