# Supplementary material for: MPA_Pathway_Tool: User-Friendly, Automatic Assignment of Microbial Community Data on Metabolic Pathways
Source: Int J Mol Sci. 2021 Oct 12;22(20):10992. doi: 10.3390/ijms222010992 (PMC8539661; doi:10.3390/ijms222010992)
Supplement: Supplementary file 1 [file ijms-22-10992-s001.zip › Supp. file 16_format for experimental data.csv]

id	koNumber	ecNumber	superkingdom	kingdom	phylum	class	order	family	genus	species	description	sample1	sample2
protein1	K00001|K00002	1.1.1.1	Bacteria	Archaea	Unknown	Crenarchaeota	Thermoprotei	Sulfolobales	Sulfolobaceae	Acidianus	Acidianus ambivalens	protein desription	1	100000000
