# Supplementary material for: MPA_Pathway_Tool: User-Friendly, Automatic Assignment of Microbial Community Data on Metabolic Pathways
Source: Int J Mol Sci. 2021 Oct 12;22(20):10992. doi: 10.3390/ijms222010992 (PMC8539661; doi:10.3390/ijms222010992)
Supplement: Supplementary file 1 [file ijms-22-10992-s001.zip › Supp. file 18_Reasons for differences in mapping.txt]

1) First, some reactions have multiple EC-numbers. In the published experimental data, only one EC-number was considered for each reaction. 
2) The second reason for the differences is the missing matching of proteins by K-numbers, which also catalyze the same reaction. They were not considered in the published data. 
3) The last reason is the usage of deprecated EC-numbers in the published data. EC- numbers are transferred to new EC- numbers occasionally. All three reasons lead to a minor loss of information in the published dataset due to less matched proteins. 
