# Supplementary material for: MPA_Pathway_Tool: User-Friendly, Automatic Assignment of Microbial Community Data on Metabolic Pathways
Source: Int J Mol Sci. 2021 Oct 12;22(20):10992. doi: 10.3390/ijms222010992 (PMC8539661; doi:10.3390/ijms222010992)
Supplement: Supplementary file 1 [file ijms-22-10992-s001.zip › Supp. file 19_EC numbers.xlsx]

## Sheet: EC numbers
EC numbers	name
6.3.4.3	Formatetetrahydrofolateligase (ADP-forming)
3.5.4.9	5,10-Methenyltetrahydrofolate-5-hydrolase
1.5.1.5	5,10-methylenetetrahydrofolate-NADP+ -oxidoreductase
1.2.7.4	Carbon-monoxide-ferredoxin-NADP+ -oxidoreductase
2.1.1.258; 2.3.1.169	Tetrahydrofolate + Acetyl-CoA <=> 5-Methyltetrahydrofolate + CoA + CO
1.5.1.20	5-methyltetrahydrofolate-NADP+ -oxidoreductase
1.17.1.10	formate-oxidoreductase
2.3.1.169	acetyl-CoA-corrinoid protein O-acetyltransferase
2.1.1.258	5-methyltetrahydrofolate-corrinoid/iron-sulfur-protein-methyltransferase
2.3.1.101	Formylmethanofuran-5,6,7,8-tetrahydromethanopterin-5-formyltransferase
3.5.4.27	5,10-Methenyltetrahydromethanopterin-10-hydrolase
1.5.98.1	5,10-methylenetetrahydromethanopterin-coenzyme-F420 oxidoreductase
1.12.98.1	Hydrogen-Coenzyme-F420-oxidoreductase
1.5.98.2	5,10-Methylenetetrahydromethanopterin-coenzyme-F420 oxidoreductase
1.2.7.12	formylmethanofuran-ferredoxin-oxidoreductase
1.17.1.9	formate-NAD+oxidoreductase
1.12.7.2	hydrogen-ferredoxin-oxidoreductase
1.8.98.6	coenzyme B,coenzyme M,ferredoxin-formate-oxidoreductase
1.12.98.2	hydrogen-N5,N10-methenyltetraydromethanopterin-oxidoreductase
2.1.1.86	5-methyl-5,6,7,8-tetrahydromethanopterin-2-mercaptoethanesulfonate-2-methyltransferase
1.8.7.3	CoB,CoM-ferredoxin-oxidoreductase
1.8.98.4	CoB,CoM,ferredoxin-coenzyme-F420 oxidoreductase
2.8.4.1	2-(methylthio)ethanesulfonate-N-(7-thioheptanoyl)-3-O-phosphothreonine-S-(2-sulfoethyl)thiotransferase
1.8.98.5	CoB,CoM,ferredoxin-hydrogen-oxidoreductase
1.8.98.1	Coenzyme B-coenzyme M-methanophenazine oxidoreductase
2.7.2.15,2.7.2.1	ATP-acetate-phosphotransferase
2.3.1.8	acetyl-CoA-phosphate-acetyltransferase
6.2.1.1	Acetate-CoA-ligase
2.1.1.245	5-methyltetrahydrosarcinapterin-corrinoid/iron-sulfur-protein-methyltransferase
R09096	acetyl-CoA-decarbonylase/synthase
