# Supplementary material for: MPA_Pathway_Tool: User-Friendly, Automatic Assignment of Microbial Community Data on Metabolic Pathways
Source: Int J Mol Sci. 2021 Oct 12;22(20):10992. doi: 10.3390/ijms222010992 (PMC8539661; doi:10.3390/ijms222010992)
Supplement: Supplementary file 1 [file ijms-22-10992-s001.zip › Supp. file 20_external experimental data Buettner, Bergen et al.xlsx]

## Sheet: K-Terms per replicate
Supplementary Table S3*. Calculation of factors F for each replicate based on relative abundances of KO groups as explained in material and methods section.
		KO groups specific for acetoclastic methanogenesis
		KO groupsof acetoclastic and hydrogenotrophic methanogensis
		KO groups specific for hydrogenotrophic methanogenesis
		KO groups of all three methanogenesis pathways
		KO groups specific for methylotrophic methanogenesis
	BP01.1	BP01.2	BP01.3	BP01.4	BP01.5	BP02.1	BP02.2	BP02.3	BP02.4	BP02.5	BP03.1	BP03.2	BP03.3	BP03.4	BP03.5	BP04.1	BP04.2	BP04.3	BP04.4	BP04.5	BP05.1	BP05.2	BP05.3	BP05.4	BP05.5	BP06.1	BP06.2	BP06.3	BP06.4	BP06.5	BP07.1	BP07.2	BP07.3	BP07.4	BP07.5	BP08.1	BP08.2	BP08.3	BP08.4	BP08.5	BP09.1	BP09.2	BP09.3	BP09.4	BP09.5	BP10.1	BP10.2	BP10.3	BP10.4
K00925	0.0425266	0.0671339	0.0632335	0.0691963	0.0709464	0.513206	0.64629	0.324264	0.441297	0.528382	0.567343	0.444812	0.535437	0.527511	0.494261	0.124482	0.138908	0.124949	0.166057	0.167233	0.152524	0.149902	0.135024	0.147096	0.153204	0.252858	0.198042	0.147323	0.263493	0.228277	0.207282	0.230293	0.184008	0.28169	0.256557	0.177928	0.220665	0.162985	0.337003	0.240251	0.314772	0.26891	0.317674	0.30357	0.336218	0.189915	0.187453	0.153882	0.271163
K00625	0.0133097	0.0100519	0.0169435	0.0193324	0.0168732	0.524185	0.700277	0.60334	0.62548	0.69599	0.525451	0.557779	0.698607	0.629841	0.73134	0.0485934	0.0806108	0.103858	0.114862	0.1032	0.152436	0.209145	0.23942	0.165205	0.178594	0.0714404	0.0847438	0.110023	0.0968971	0.118443	0.0634025	0.0781931	0.0795301	0.086022	0.104613	0.0700903	0.0765009	0.066706	0.0750471	0.0960717	0.454486	0.421549	0.648421	0.545838	0.648759	0.0365705	0.0384456	0.0347183	0.0473189
K01895	6.07934	5.8884	4.81793	4.37877	4.82207	0.210126	0.138547	0.133073	0.140781	0.148321	0.0746757	0.0597634	0.0546524	0.0619055	0.0535327	0.0616468	0.0723833	0.0624065	0.0481547	0.0349219	4.16	4.26966	4.90196	4.94765	3.00553	0.0680017	0.214746	0.137938	0.0330972	0.125687	0.0627274	0.0711276	0.0753101	0.0649834	0.0820523	0.0667642	0.069424	0.0530153	0.0574743	0.0647805	0.0603963	0.0775167	0.0646051	0.041084	0.0348711	0.116693	0.126646	0.112334	0.110867
K00193	1.65058	1.90388	1.45404	1.20678	1.86259	4.19042	4.40561	2.15475	3.13396	3.95375	3.95859	2.96093	3.37016	3.44381	2.85028	0.163775	0.203733	0.097216	0.215648	0.141135	2.57369	2.74551	2.40204	2.6836	2.43219	0.65872	0.47611	0.290894	0.355264	0.384245	0.436562	0.300223	0.199191	0.315979	0.291668	0.246591	0.292722	0.192381	0.323323	0.216566	1.71173	1.40929	1.67752	1.79142	2.28836	0.365199	0.248549	0.197966	0.276019
K00197	1.95265	1.6804	1.64306	1.42871	1.62482	3.46011	3.79075	4.05238	3.67699	4.26868	2.91283	3.33744	3.56182	3.88759	3.83442	0.462982	0.497905	0.543128	0.555669	0.620593	2.27935	2.35134	2.55338	2.4665	2.03888	0.620029	0.71775	0.89757	0.825031	1.05199	0.649952	0.778741	0.988863	0.833244	1.04184	0.689982	0.745474	0.781299	0.716757	0.997034	1.83844	1.6958	2.53104	1.81457	2.32503	0.37695	0.458492	0.500144	0.408542
K00194	1.01372	0.937633	0.578163	0.663957	0.761991	1.16415	1.33953	0.816058	1.18675	0.931392	0.906398	1.15115	1.2191	1.15883	0.964829	0.27826	0.417654	0.306906	0.341282	0.313144	0.853219	0.995859	0.658133	1.11699	0.807802	0.296237	0.453363	0.41528	0.408431	0.493646	0.398496	0.562284	0.407148	0.508621	0.493256	0.351531	0.537123	0.369995	0.401356	0.505748	0.548773	0.509798	0.401489	0.467252	0.517094	0.193529	0.266317	0.233447	0.21542
Sum	10.7521	10.4875	8.57336	7.76675	9.15929	10.0622	11.021	8.08386	9.20525	10.5265	8.9453	8.51188	9.43978	9.70948	8.92867	1.13974	1.41119	1.23846	1.44167	1.38023	10.1712	10.7214	10.89	11.527	8.6162	1.96729	2.14476	1.99903	1.98221	2.40229	1.81842	2.02086	1.93405	2.09054	2.26998	1.60289	1.94191	1.62638	1.91096	2.12045	4.9286	4.38287	5.64075	4.96373	6.15034	1.27886	1.3259	1.23249	1.32933
K00577	0.593977	0.59687	0.723137	0.588513	0.604284	0.429193	0.508322	0.785692	0.742558	0.576294	0.522082	0.720535	0.621161	0.831612	0.886077	0.320228	0.393006	0.383398	0.376567	0.273179	0.371521	0.611148	0.73659	0.598714	0.553653	0.381176	0.59372	0.577746	0.540619	0.50685	0.425914	0.656817	0.442758	0.496971	0.402046	0.431998	0.599065	0.55795	0.403867	0.414748	0.508785	0.570649	0.433463	0.472006	0.505358	0.379005	0.462495	0.458885	0.402538
K00578	0.0017157	0.00356778	0.00341596	0.00182334	0.00299459	0.0119235	0.0266261	0.0381595	0.0157023	0.010848	0.00555708	0.0350755	0.0101156	0.0136603	0.0310016	0	0	0	0	0	0.00365329	0.0110659	0.00500697	0.00353044	0.00765249	0.00112654	0.0023593	0.00168051	0.00128686	0.00165399	0.0018358	0.00285714	0.00232704	0.00318998	0.00271091	0.00181853	0.00474709	0.00245265	0.00330156	0.00394505	0.0138907	0.0127517	0.0065277	0.0151892	0.00860825	0.00519748	0.00467123	0.00121924	0.00431849
K00579	0.00286616	0.00372058	0.00288502	0.00596196	0.00590258	0.00110679	0.00429807	0.00552638	0.00355895	0.00294659	0.000859776	0.00242343	0.00065154	0.000932521	0.00184085	0.00587979	0.0101141	0.00879598	0.00640442	0.00439928	0.000980616	0.00176997	0.00137731	0.00162758	0.00268384	0	0	0	0	0	0	0	0	0	0	0.000293667	0.000779647	0	0.000420489	0.00101445	0	0	0	0	0	0	0.00249083	0	0.00160942
K00580	0.0421533	0.0323683	0.0419004	0.0506926	0.0333267	0.00347033	0.00115062	0.00739366	0.00516756	0.00990199	0.00730162	0.023695	0.00691018	0.0106124	0.0183501	0.0603109	0.0835811	0.0892979	0.0720506	0.0341932	0.0161577	0.0250539	0.0279864	0.0229896	0.024743	0.043082	0.0581133	0.0765969	0.0809073	0.0570731	0.0844802	0.0534454	0.0341593	0.0563578	0.0375113	0.0347472	0.0467234	0.0726987	0.0358835	0.0382556	0.0258915	0.0280233	0.00909573	0.0138896	0.0117934	0.0442726	0.0725501	0.0560525	0.0481564
K00581	0.16172	0.144194	0.16063	0.162586	0.117376	0.129038	0.179833	0.207575	0.211685	0.148516	0.14953	0.190041	0.134744	0.186933	0.191681	0.173484	0.218872	0.260497	0.1729	0.0952981	0.110524	0.147756	0.161984	0.16067	0.148723	0.190493	0.262625	0.324697	0.265487	0.255704	0.254366	0.256517	0.146866	0.183004	0.138984	0.14018	0.246174	0.333273	0.138034	0.158725	0.155518	0.184572	0.116397	0.151309	0.135186	0.168293	0.300473	0.258221	0.216492
K00582	0	0	0	0	0	0	0.000896288	0.00204448	0.00107838	0.00152684	0	0	0	0	0	0	0	0	0	0	0.000450068	0	0.000957149	0	0.000984686	0	0.000558548	0.000307278	0.000628925	0	0	0	0	0	0	0	0	0	0	0	0	0	0	0	0	0	0	0	0
K00583	0	0	0	0	0	0.00347865	0.00875836	0.0178324	0.00444421	0.00540208	0.00267947	0.00771456	0.00395555	0.00256225	0.00752459	0	0	0	0	0	0.00269094	0.00645833	0.0050586	0.00275879	0.0045907	0	0	0	0	0	0	0	0	0	0	0	0	0	0	0	0.00615666	0.00734332	0.0111966	0.00701073	0.00579026	0	0	0	0
K00584	0.820381	0.597997	0.558805	0.59785	0.579332	1.17225	1.4235	0.991199	1.24562	1.19626	1.34221	1.3759	1.23387	1.71279	1.66452	0.273918	0.285894	0.377546	0.305704	0.247189	0.671099	0.793114	0.700161	0.776242	0.615252	0.18021	0.247985	0.344411	0.218001	0.237269	0.190054	0.297084	0.262812	0.231817	0.240694	0.219532	0.24306	0.414856	0.187642	0.232105	0.866986	1.01561	1.04033	0.968928	1.097	0.166563	0.256126	0.248779	0.239103
Sum	1.62281	1.37872	1.49077	1.40743	1.34322	1.75046	2.15338	2.05542	2.22981	1.9517	2.03022	2.35539	2.0114	2.7591	2.80099	0.83382	0.991468	1.11954	0.933627	0.654258	1.17708	1.59637	1.63912	1.56653	1.35828	0.796087	1.16536	1.32544	1.10693	1.05855	0.956651	1.26672	0.888923	0.971339	0.821947	0.82857	1.14055	1.38123	0.769148	0.848793	1.57723	1.81895	1.61701	1.62833	1.76373	0.763331	1.09881	1.02316	0.912216
K00200	0.048031	0.0408018	0.0613204	0.0480134	0.0377137	0.0519911	0.0208099	0.034869	0.0322363	0.0354434	0.0297106	0.03999	0.0303373	0.0317901	0.0347249	0.53324	0.443278	0.286817	0.343246	0.243324	0.0305104	0.0289738	0.023002	0.0183596	0.0334743	0.20589	0.218888	0.152744	0.166813	0.171837	0.0873744	0.080818	0.0859355	0.113834	0.092698	0.0787186	0.0657724	0.0583211	0.0733591	0.0662363	0.05252	0.0669083	0.0650679	0.0517941	0.042404	0.0992391	0.0701708	0.0863512	0.0946596
K00201	0.0778651	0.0805282	0.134315	0.0788109	0.101717	0.118158	0.125003	0.161104	0.132127	0.147227	0.123066	0.140847	0.163175	0.13469	0.185383	0.632048	0.437978	0.339052	0.445622	0.362455	0.0827894	0.105713	0.13281	0.0914603	0.119204	0.36472	0.271403	0.211886	0.329465	0.26568	0.393529	0.300655	0.222331	0.353791	0.265278	0.362141	0.242733	0.224998	0.30683	0.260078	0.146296	0.133625	0.193058	0.171801	0.184072	0.205819	0.169442	0.287451	0.308934
K00202	0.0405713	0.0351446	0.0517994	0.0378688	0.0433898	0.0167642	0.0199434	0.0423784	0.0125229	0.0183472	0.0387761	0.0208054	0.031318	0.0298472	0.0297282	0.166274	0.0953692	0.0679091	0.107443	0.082134	0.0250307	0.0210936	0.0230983	0.0152216	0.0269036	0.104536	0.0466304	0.040029	0.0616638	0.0514104	0.114689	0.0587254	0.06318	0.0947217	0.0936264	0.125436	0.0491304	0.040168	0.0959552	0.065744	0.0161593	0.00907926	0.0325988	0.0433302	0.0335168	0.0584299	0.0381015	0.0661252	0.0840715
K00203	0.00315087	0.00068478	0.00323954	0.00128628	0.000518961	0.0093377	0.00944515	0.00972809	0.00906356	0.0105126	0.00791032	0.00760431	0.00759339	0.0060915	0.00898148	0.121043	0.0681865	0.0421666	0.0831757	0.0409156	0.0045755	0.00301775	0.00128078	0.0028209	0.00347706	0.0776607	0.0508617	0.0319374	0.0529871	0.0501067	0.088546	0.04889	0.0371136	0.0762007	0.0563377	0.0864418	0.0497711	0.0443231	0.0636845	0.052637	0.0163479	0.0195436	0.0219977	0.0290068	0.020604	0.0528412	0.0511125	0.065036	0.0765305
K11261	0.0323171	0.0223933	0.0238332	0.0205341	0.0319027	0.124524	0.150804	0.112141	0.122786	0.14495	0.080379	0.0856053	0.0833233	0.0947359	0.102277	0.10757	0.166469	0.206564	0.109754	0.0821313	0.0493246	0.0707159	0.0629259	0.052535	0.0504392	0.760236	0.535154	0.225329	0.307833	0.59324	0.395107	0.30143	0.352045	0.25411	0.394138	0.437024	0.305283	0.215286	0.378032	0.125859	0.368205	0.269591	0.290787	0.30982	0.240382	0.352254	0.339743	0.318186	0.243124
K00205	0.0110312	0.00282105	0.00865308	0.0107843	0.00960974	0.00509039	0.00304872	0.00370107	0.00225492	0.00279499	0.0112904	0.00438072	0.00315655	0.0076739	0.0091574	0.347402	0.179173	0.107906	0.132892	0.0807681	0.0327427	0.0434957	0.0280743	0.0261035	0.0319833	0.0924382	0.0753702	0.0693952	0.0624168	0.070805	0.108382	0.0523954	0.0559289	0.0541683	0.0650235	0.0791455	0.0541583	0.0593863	0.0577428	0.0507672	0.0358027	0.0439174	0.0436124	0.0580375	0.0471812	0.0373578	0.0318389	0.0598029	0.0551052
K00672	0.0482037	0.0516092	0.0497193	0.0430815	0.0467151	0.0171244	0.0171916	0.0346141	0.0190917	0.0161649	0.0208291	0.0246222	0.0221444	0.0190149	0.0296574	0.1438	0.133369	0.102702	0.128872	0.151096	0.0246425	0.0386496	0.0395785	0.0321132	0.0405952	0.137537	0.141401	0.0765948	0.144443	0.143075	0.132062	0.188697	0.136934	0.174885	0.208908	0.177642	0.185872	0.0739962	0.146576	0.20892	0.0407225	0.0440759	0.0608449	0.0460644	0.0583339	0.11028	0.102285	0.0988526	0.0853793
K01499	0.00476502	0.00132787	0.00475254	0.00507563	0.00563563	0.016351	0.020595	0.02124	0.0181774	0.0250571	0.0212284	0.0213145	0.0250109	0.0204735	0.0211555	0.15779	0.148552	0.145773	0.140566	0.12911	0.0137513	0.0122134	0.00812283	0.00839087	0.0107291	0.0675782	0.0412474	0.0389821	0.0507843	0.036848	0.0842429	0.0534385	0.0664741	0.0629113	0.0674354	0.0453361	0.0402935	0.0507229	0.0530423	0.05853	0.0206438	0.0105746	0.0251708	0.0204851	0.0281668	0.0424495	0.0300372	0.0718343	0.0639251
K00319	0.594832	0.636827	0.88588	0.735309	0.710233	0.267507	0.183561	0.242907	0.212929	0.21505	0.516751	0.438784	0.510083	0.417083	0.416606	4.02039	3.43715	3.58969	3.9775	3.89916	0.734921	0.812206	0.817407	0.703661	0.822846	3.59731	3.18614	3.06825	2.94602	2.90682	2.94779	3.57765	3.77562	3.55117	3.34984	3.66978	3.64416	3.56322	4.3268	3.65894	1.44326	1.48727	1.397	1.03884	1.08857	2.84795	3.0152	3.03889	3.11154
K13942	0	0.00319257	0	0.00571096	0.00312471	0	0	0.0011099	0.000753535	0.00109681	0.00123506	0.000968996	0.00151727	0.000773317	0.00128332	0.00736033	0.00602405	0.0054225	0.00918483	0.00906255	0	0	0	0	0	0	0	0	0	0	0	0	0	0	0	0	0	0	0	0	0	0	0	0	0	0	0	0	0
K00320	1.95716	1.58441	1.8327	1.80734	1.64795	0.90061	0.618863	0.687058	0.593414	0.4788	1.02976	1.44717	0.672272	0.857713	1.02268	7.96754	7.96424	9.41471	7.74866	6.41843	1.44686	1.68405	1.63901	1.19069	1.64494	5.30205	5.43372	5.62254	5.24162	5.26674	4.89656	6.34262	6.82464	5.70692	5.69343	6.34007	6.49734	5.83811	5.53049	6.05609	2.44982	2.72862	2.70021	2.16165	2.03641	4.42595	5.13055	5.91145	5.04496
Sum	2.81792	2.45974	3.05621	2.79382	2.63851	1.52746	1.16926	1.35085	1.15536	1.09544	1.88094	2.2321	1.54993	1.61989	1.86164	14.2045	13.0798	14.3087	13.2269	11.4986	2.44515	2.82013	2.77531	2.14136	2.78459	10.71	10.0008	9.53769	9.36405	9.55657	9.24829	11.0053	11.6202	10.4427	10.2867	11.4017	11.1345	10.1685	11.0325	10.6038	4.58977	4.8132	4.83036	3.93083	3.77963	8.23257	8.97849	10.004	9.16822
K00399	8.25175	7.50406	5.40842	5.25538	6.57599	13.254	14.0068	10.7295	13.4729	12.1204	12.2056	14.6982	11.6864	14.5367	13.1455	5.00147	5.02665	4.28309	5.46114	3.90804	8.55416	7.47913	7.3594	10.0217	7.34105	9.22843	7.39129	6.67043	8.70296	7.9768	8.05856	5.60763	5.8452	6.72531	5.66498	7.0731	5.54021	6.96058	6.90293	5.78302	9.78708	7.90915	7.8515	9.00967	7.945	5.63571	4.22778	3.91305	5.03509
K00401	5.00347	5.31192	6.7415	4.75284	6.31927	5.93	6.62442	7.25829	5.98514	7.5458	5.8109	5.76624	7.09625	7.02506	7.18366	6.529	6.87309	7.48178	6.54118	6.01127	4.75165	4.17056	5.11826	4.29634	5.49621	7.97565	7.93632	7.75714	7.82757	8.43206	5.94531	6.68487	6.03848	6.62862	7.15606	6.12283	6.57973	5.67983	6.01907	7.22663	5.31191	5.53255	6.83582	4.38825	5.01694	4.57579	4.3127	4.49817	4.35176
K00402	7.81551	6.89918	6.45433	6.6723	7.20773	13.4021	12.8597	14.561	14.2118	11.981	12.9459	13.1362	13.5023	15.8753	14.0432	5.1971	5.17855	4.85258	5.27571	4.05097	7.06225	7.51133	7.08294	7.57869	6.31569	6.33315	7.02084	5.1829	6.00591	6.32552	5.18802	6.21987	5.02262	5.17306	5.23966	5.67743	5.60796	4.47017	5.89376	5.10997	9.69782	9.39987	10.0669	10.5204	10.0558	4.27058	3.81856	3.70948	3.85151
K03388	0.107266	0.0605416	0.0625368	0.0940336	0.0704046	0.0796773	0.0403217	0.0355152	0.0454353	0.0519009	0.104366	0.0824059	0.0671655	0.0525182	0.0615844	1.16384	1.06607	0.693444	0.921349	0.730967	0.104991	0.116728	0.0917632	0.106963	0.123075	0.640735	0.553258	0.5385	0.611142	0.672339	0.558301	0.524011	0.41601	0.587909	0.637249	0.577292	0.556384	0.381368	0.50507	0.68535	0.217039	0.256818	0.20823	0.159102	0.195909	0.748979	0.612018	0.465265	0.649732
K03389	0.00862465	0.0126041	0.00486467	0.00738571	0.00887218	0.00360067	0.00484328	0.00669639	0.00603906	0.00588892	0.0116613	0.0125596	0.0117069	0.00800906	0.0122189	0.203553	0.15521	0.137737	0.124301	0.106919	0.0112167	0.00535341	0.00389594	0.00811522	0.00725956	0.0565299	0.0502623	0.0383551	0.0563968	0.0488312	0.057868	0.0475599	0.0357391	0.0533588	0.0393192	0.0549879	0.049782	0.0329371	0.0405605	0.0329288	0.0113371	0.00913637	0.0142201	0.0119184	0.0168785	0.0426755	0.0317814	0.057892	0.0650933
K03390	0.0084054	0.00508032	0.00297401	0.00836942	0.00404335	0.0035379	0.00213233	0.00197116	0.0025004	0.00303898	0.00902548	0.00692352	0.00632342	0.00723129	0.00774324	0.125193	0.0714825	0.043412	0.08444	0.0442987	0.0052949	0.00649526	0.00343469	0.00386853	0.00804017	0.0448258	0.0286614	0.0169692	0.0321358	0.026836	0.0284504	0.0225788	0.0148421	0.0309983	0.0217558	0.0347314	0.0276814	0.0158436	0.0252739	0.0168157	0.00863689	0.00339449	0.00554363	0.011661	0.00681747	0.0313782	0.0203101	0.0325555	0.0448513
K08264	0.233377	0.21253	0.205658	0.197195	0.212192	0.15964	0.139157	0.146398	0.150205	0.187943	0.238414	0.21133	0.247405	0.227289	0.234833	0.00224733	0	0.00671085	0.00126373	0.00794381	0.19236	0.147409	0.156654	0.236929	0.162338	0.00285078	0.00502417	0.00299163	0.00011045	0.00317803	0.000954969	0.00077463	0.00538695	0.00170376	0.00167962	0.00246969	0.00116911	0.00180758	0.000233732	0.00273567	0.118955	0.0763681	0.139846	0.121721	0.156748	0	0.000674907	0.000581847	0.000789517
K08265	0	0	0	0	0	0.00228815	0.000384675	0.00181999	0.00217468	0.00223894	0.00203741	0.00254337	0.0011115	0.00210704	0.00248011	0	0	0	0	0	0	0	0	0	0	0	0	0	0	0	0	0	0	0	0	0	0	0	0	0	0.00205792	0.00170404	0	0.00154614	0.0015036	0	0	0	0
K14126	0.00362879	0.00379054	0.00383102	0.00325708	0.00563456	0.00600767	0.00665204	0.0124645	0.0106694	0.00896213	0.0143914	0.0233664	0.0159647	0.0117888	0.0114817	0.0405417	0.0543732	0.0652325	0.0366221	0.0407404	0.0257226	0.0302994	0.0385526	0.0377314	0.0403604	0.0215218	0.0487574	0.0378765	0.0222506	0.0432532	0.0271663	0.0610538	0.0326971	0.0311368	0.0345737	0.0219622	0.0729291	0.0461573	0.0300626	0.0501931	0.025852	0.0318517	0.0283749	0.0142407	0.0224327	0.0152621	0.030413	0.0232615	0.0161351
K14127	0.00145933	0.00158893	0.00140703	0.00133073	0.00176823	0.00248931	0.0018365	0.0032982	0.00309209	0.00425738	0.00548568	0.00813031	0.00726877	0.00321193	0.0046976	0.00293181	0.00490346	0.00633204	0.00554432	0.00640912	0.00472287	0.0091926	0.0147951	0.00799535	0.016318	0	0	0	0	0	0.000392623	0	0.00077895	0.000313265	0.000435907	0.000300737	0.000559972	0	0.00050157	0.00039658	0	0	0	0	0	0	0	0	0
K22516	0.56049	0.570287	0.485067	0.569095	0.592366	0.211012	0.160979	0.125628	0.138675	0.128548	0.419468	0.308545	0.221031	0.280465	0.270078	1.81549	1.53352	1.23224	1.83861	1.18481	0.53275	0.430195	0.278017	0.481904	0.426705	0.519045	0.390367	0.235458	0.45407	0.358561	0.883736	0.589718	0.479028	0.669884	0.66908	0.843572	0.590671	0.439158	0.830232	0.604187	0.286472	0.23098	0.224663	0.278517	0.214358	0.559077	0.368178	0.352414	0.54433
K00125	0.103616	0.0837667	0.0834549	0.0988867	0.122112	0.0624317	0.0378095	0.0417808	0.0451419	0.0387808	0.0953927	0.0734587	0.05818	0.0896542	0.0806039	0.777958	0.43482	0.331773	0.49629	0.354478	0.0918733	0.0563032	0.0432534	0.0654752	0.0765287	0.131227	0.103869	0.0590232	0.140001	0.115668	0.179971	0.142336	0.069169	0.177843	0.165309	0.174961	0.141649	0.0620226	0.154639	0.162485	0.0485793	0.0304757	0.0488557	0.0455266	0.0492814	0.0964771	0.0674668	0.0646127	0.125483
Sum	22.0976	20.6653	19.454	17.6601	21.1204	33.1167	33.885	32.9244	34.0738	32.0787	31.8626	34.3298	32.9211	38.1194	35.058	20.8593	20.3987	19.1343	20.7865	16.4468	21.337	19.963	20.191	22.8457	20.0136	24.954	23.5286	20.5396	23.8525	24.003	20.9287	19.9004	17.96	20.0801	19.6301	20.5836	19.1687	18.0899	20.4023	19.6747	25.5157	23.4823	25.4239	24.5625	23.6817	15.9759	13.4899	13.1173	14.6848
K14080	0	0	0	0	0	0.0137816	0.0180854	0.023079	0.0214459	0.0193675	0.0157591	0.0192754	0.0200664	0.0241447	0.0280867	0	0	0	0	0	0.00140352	0.00680085	0.00760376	0.00383319	0.0102078	0.000222372	0.000448895	0	0.000435364	0.000343027	0	0	0	0	0	0.000753787	0	0.000263775	0.000295123	0	0.0196266	0.0214255	0.0240203	0.0197334	0.0221335	0.000456987	0.000525021	0.000224876	0.000578273
K04480	0.364775	0.334722	0.29899	0.358564	0.266525	1.20587	1.27621	1.03611	1.02036	1.27695	0.502033	0.485101	0.536389	0.496498	0.53118	0.0729695	0.0817859	0.101025	0.0866282	0.050091	0.633437	0.636597	0.586232	0.582655	0.597987	0.00851363	0.0343903	0.012769	0.00790014	0.0333029	0.178117	0.167275	0.178089	0.146242	0.208043	0.182448	0.154993	0.153684	0.187167	0.177577	1.02714	0.859182	1.07778	0.999625	1.10932	0.0285272	0.0262676	0.0187163	0.0217991
K14081	0.0423421	0.0540038	0.0395636	0.0504334	0.0396827	0.206388	0.356791	0.356785	0.277154	0.28628	0.0769003	0.144091	0.0939952	0.120761	0.183898	0.00882411	0.00666862	0.00368859	0.00748365	0.00197228	0.133455	0.139791	0.123509	0.139669	0.190521	0.00947198	0.016753	0.0186784	0.00930389	0.0196478	0.01819	0.0370441	0.0164289	0.0267731	0.0306963	0.0177338	0.0407451	0.0221362	0.0137614	0.0252346	0.267545	0.239108	0.233192	0.233977	0.264268	0.00850768	0.0122336	0.00286014	0.00514389
Sum	0.407118	0.388726	0.338554	0.408998	0.306208	1.42604	1.65109	1.41597	1.31896	1.5826	0.594692	0.648468	0.650451	0.641404	0.743165	0.0817936	0.0884545	0.104714	0.0941119	0.0520633	0.768295	0.783189	0.717345	0.726157	0.798716	0.018208	0.0515922	0.0314474	0.0176394	0.0532938	0.196307	0.204319	0.194518	0.173015	0.23874	0.200936	0.195738	0.176084	0.201223	0.202811	1.31431	1.11972	1.33499	1.25333	1.39572	0.0374919	0.0390262	0.0218013	0.0275213
[truncated: 31 more columns]

## Sheet: F-value calculation
Supplementary Table S3*. Calculation of factors F for each replicate based on relative abundances of KO groups as explained in material and methods section.
	Sum	Sum	Sum	Sum	Sum	FM-value	Suggested main methanogenesis pathway
BP01.1	10.7521	1.62281	2.81792	22.0976	0.407118	3.81562	AcMe
BP01.2	10.4875	1.37872	2.45974	20.6653	0.388726	4.26366	AcMe
BP01.3	8.57336	1.49077	3.05621	19.454	0.338554	2.80523	AcMe
BP01.4	7.76675	1.40743	2.79382	17.6601	0.408998	2.77998	AcMe
BP01.5	9.15929	1.34322	2.63851	21.1204	0.306208	3.47138	AcMe
BP02.1	10.0622	1.75046	1.52746	33.1167	1.42604	6.58754	AcMe
BP02.2	11.021	2.15338	1.16926	33.885	1.65109	9.4256	AcMe
BP02.3	8.08386	2.05542	1.35085	32.9244	1.41597	5.98428	AcMe
BP02.4	9.20525	2.22981	1.15536	34.0738	1.31896	7.96746	AcMe
BP02.5	10.5265	1.9517	1.09544	32.0787	1.5826	9.60936	AcMe
BP03.1	8.9453	2.03022	1.88094	31.8626	0.594692	4.75577	AcMe
BP03.2	8.51188	2.35539	2.2321	34.3298	0.648468	3.8134	AcMe
BP03.3	9.43978	2.0114	1.54993	32.9211	0.650451	6.09045	AcMe
BP03.4	9.70948	2.7591	1.61989	38.1194	0.641404	5.99393	AcMe
BP03.5	8.92867	2.80099	1.86164	35.058	0.743165	4.79613	AcMe
BP04.1	1.13974	0.83382	14.2045	20.8593	0.0817936	0.0802381	HyMe
BP04.2	1.41119	0.991468	13.0798	20.3987	0.0884545	0.107891	HyMe
BP04.3	1.23846	1.11954	14.3087	19.1343	0.104714	0.0865531	HyMe
BP04.4	1.44167	0.933627	13.2269	20.7865	0.0941119	0.108995	HyMe
BP04.5	1.38023	0.654258	11.4986	16.4468	0.0520633	0.120035	HyMe
BP05.1	10.1712	1.17708	2.44515	21.337	0.768295	4.15975	AcMe
BP05.2	10.7214	1.59637	2.82013	19.963	0.783189	3.80175	AcMe
BP05.3	10.89	1.63912	2.77531	20.191	0.717345	3.92387	AcMe
BP05.4	11.527	1.56653	2.14136	22.8457	0.726157	5.38305	AcMe
BP05.5	8.6162	1.35828	2.78459	20.0136	0.798716	3.09425	AcMe
BP06.1	1.96729	0.796087	10.71	24.954	0.018208	0.183688	HyMe
BP06.2	2.14476	1.16536	10.0008	23.5286	0.0515922	0.214458	HyMe
BP06.3	1.99903	1.32544	9.53769	20.5396	0.0314474	0.209593	HyMe
BP06.4	1.98221	1.10693	9.36405	23.8525	0.0176394	0.211683	HyMe
BP06.5	2.40229	1.05855	9.55657	24.003	0.0532938	0.251376	HyMe
BP07.1	1.81842	0.956651	9.24829	20.9287	0.196307	0.196623	HyMe
BP07.2	2.02086	1.26672	11.0053	19.9004	0.204319	0.183626	HyMe
BP07.3	1.93405	0.888923	11.6202	17.96	0.194518	0.166439	HyMe
BP07.4	2.09054	0.971339	10.4427	20.0801	0.173015	0.200191	HyMe
BP07.5	2.26998	0.821947	10.2867	19.6301	0.23874	0.220671	HyMe
BP08.1	1.60289	0.82857	11.4017	20.5836	0.200936	0.140583	HyMe
BP08.2	1.94191	1.14055	11.1345	19.1687	0.195738	0.174404	HyMe
BP08.3	1.62638	1.38123	10.1685	18.0899	0.176084	0.159943	HyMe
BP08.4	1.91096	0.769148	11.0325	20.4023	0.201223	0.173212	HyMe
BP08.5	2.12045	0.848793	10.6038	19.6747	0.202811	0.199971	HyMe
BP09.1	4.9286	1.57723	4.58977	25.5157	1.31431	1.07382	BoMe
BP09.2	4.38287	1.81895	4.8132	23.4823	1.11972	0.910592	BoMe
BP09.3	5.64075	1.61701	4.83036	25.4239	1.33499	1.16777	BoMe
BP09.4	4.96373	1.62833	3.93083	24.5625	1.25333	1.26277	BoMe
BP09.5	6.15034	1.76373	3.77963	23.6817	1.39572	1.62723	BoMe
BP10.1	1.27886	0.763331	8.23257	15.9759	0.0374919	0.155341	HyMe
BP10.2	1.3259	1.09881	8.97849	13.4899	0.0390262	0.147675	HyMe
BP10.3	1.23249	1.02316	10.004	13.1173	0.0218013	0.1232	HyMe
BP10.4	1.32933	0.912216	9.16822	14.6848	0.0275213	0.144993	HyMe
BP10.5	1.29758	0.714444	8.54733	14.1924	0.0232809	0.151811	HyMe
BP11.1	1.54005	0.961106	12.4113	18.7702	0.0761262	0.124084	HyMe
BP11.2	4.53205	1.50605	3.97728	25.1416	0.58516	1.13948	BoMe
BP11.3	5.0788	2.02243	4.57213	30.2992	0.794203	1.11082	BoMe
BP11.4	6.37372	1.73407	3.18049	30.637	0.838802	2.00401	BoMe
BP11.5	6.18937	1.78653	3.39763	31.0545	0.964019	1.82167	BoMe
BP12.1	5.95818	1.54127	4.38205	28.192	0.626715	1.35968	BoMe
BP12.2	1.23614	1.20214	12.8793	12.9385	0.0227797	0.0959791	HyMe
BP12.3	1.46995	1.55551	14.3561	12.0137	0.0340716	0.102392	HyMe
BP12.4	1.68196	1.22123	12.5635	12.5154	0.0179812	0.133877	HyMe
BP12.5	1.58855	1.41837	12.3647	12.988	0.0280438	0.128475	HyMe
BP13.1	1.9506	0.714872	9.04874	19.0006	0.0878446	0.215565	HyMe
BP13.2	1.83105	1.43756	10.2276	16.7312	0.0998201	0.17903	HyMe
BP13.3	1.93817	1.17713	10.34	17.344	0.0709872	0.187444	HyMe
BP13.4	2.30865	0.959833	9.55865	18.3849	0.0728887	0.241525	HyMe
BP13.5	2.25902	0.839422	9.50319	18.8995	0.0729922	0.237712	HyMe
BP14.1	7.09892	1.29426	2.79585	27.9352	1.88309	2.5391	AcMe
BP14.2	11.4551	1.59981	2.03583	22.9514	0.756194	5.62676	AcMe
BP14.3	7.44636	2.15536	2.96389	30.2729	2.12129	2.51236	AcMe
BP14.4	8.11573	1.98232	2.63424	33.4463	2.10904	3.08087	AcMe
BP14.5	9.28339	1.90496	2.63643	31.4601	2.19383	3.5212	AcMe
BP15.1	1.85987	0.506219	3.10121	8.78786	0.129412	0.599723	BoMe
BP15.2	2.48841	0.802868	4.78203	10.5103	0.194755	0.520367	BoMe
BP15.3	2.35732	0.750404	4.12512	7.94341	0.0929201	0.571455	BoMe
BP15.4	2.24406	0.596411	4.12306	8.02106	0.0968379	0.544271	BoMe
BP15.5	2.39644	0.448875	3.54372	8.03262	0.126658	0.676249	BoMe
BP16.1	0.460185	0.507704	16.4055	14.5737	0.0172888	0.0280506	HyMe
BP16.2	1.30519	0.544344	8.00426	9.9436	0.171753	0.163062	HyMe
BP16.3	0.437872	0.622715	14.1065	15.2145	0.0207265	0.0310404	HyMe
BP16.4	0.401251	0.584892	14.9682	16.5078	0.0165124	0.0268068	HyMe
BP16.5	0.488811	0.583511	12.4865	14.4922	0.0162819	0.0391472	HyMe

## Sheet: MPA_Pathway_Tool vs publication
pathway	identified reactions	total reactions in pathway	BP01.1	BP01.2	BP01.3	BP01.4	BP01.5	BP02.1	BP02.2	BP02.3	BP02.4	BP02.5	BP03.1	BP03.2	BP03.3	BP03.4	BP03.5	BP04.1	BP04.2	BP04.3	BP04.4	BP04.5	BP05.1	BP05.2	BP05.3	BP05.4	BP05.5	BP06.1	BP06.2	BP06.3	BP06.4	BP06.5	BP07.1	BP07.2	BP07.3	BP07.4	BP07.5	BP08.1	BP08.2	BP08.3	BP08.4	BP08.5	BP09.1	BP09.2	BP09.3	BP09.4	BP09.5	BP10.1	BP10.2
acetoclastic_and_hydrogenotrophic_methanogenesis.csv	8	8	1.61	1.37	1.48	1.41	1.34	1.74	2.15	2.07	2.23	1.96	2.03	2.36	2	2.75	2.8	0.83	0.99	1.12	0.94	0.65	1.17	1.6	1.65	1.56	1.35	0.79	1.16	1.32	1.11	1.07	0.95	1.27	0.88	0.97	0.82	0.82	1.14	1.37	0.77	0.84	1.59	1.82	1.62	1.63	1.78	0.77	1.09
summed data publication			1.62281	1.37872	1.49077	1.40743	1.34322	1.75046	2.15338	2.05542	2.22981	1.9517	2.03022	2.35539	2.0114	2.7591	2.80099	0.83382	0.991468	1.11954	0.933627	0.654258	1.17708	1.59637	1.63912	1.56653	1.35828	0.796087	1.16536	1.32544	1.10693	1.05855	0.956651	1.26672	0.888923	0.971339	0.821947	0.82857	1.14055	1.38123	0.769148	0.848793	1.57723	1.81895	1.61701	1.62833	1.76373	0.763331	1.09881
methylotrophic_methanogenesis.csv	3	3	0.4	0.38	0.34	0.41	0.31	1.43	1.66	1.42	1.32	1.59	0.6	0.65	0.65	0.64	0.74	0.08	0.09	0.1	0.1	0.05	0.76	0.79	0.72	0.72	0.8	0.02	0.05	0.03	0.02	0.05	0.2	0.21	0.2	0.18	0.24	0.2	0.19	0.17	0.2	0.21	1.32	1.12	1.33	1.25	1.39	0.04	0.04
summed data publication			0.407118	0.388726	0.338554	0.408998	0.306208	1.42604	1.65109	1.41597	1.31896	1.5826	0.594692	0.648468	0.650451	0.641404	0.743165	0.0817936	0.0884545	0.104714	0.0941119	0.0520633	0.768295	0.783189	0.717345	0.726157	0.798716	0.018208	0.0515922	0.0314474	0.0176394	0.0532938	0.196307	0.204319	0.194518	0.173015	0.23874	0.200936	0.195738	0.176084	0.201223	0.202811	1.31431	1.11972	1.33499	1.25333	1.39572	0.0374919	0.0390262
methanogenesis.csv	12	12	22.09	20.65	19.44	17.66	21.12	33.1	33.88	32.93	34.08	32.08	31.87	34.33	32.94	38.13	35.04	20.86	20.39	19.13	20.79	16.44	21.32	19.98	20.18	22.86	20.03	24.95	23.53	20.55	23.85	24.01	20.94	19.89	17.97	20.08	19.63	20.56	19.17	18.09	20.4	19.67	25.53	23.48	25.43	24.56	23.7	15.99	13.49
summed data publication			22.0976	20.6653	19.454	17.6601	21.1204	33.1167	33.885	32.9244	34.0738	32.0787	31.8626	34.3298	32.9211	38.1194	35.058	20.8593	20.3987	19.1343	20.7865	16.4468	21.337	19.963	20.191	22.8457	20.0136	24.954	23.5286	20.5396	23.8525	24.003	20.9287	19.9004	17.96	20.0801	19.6301	20.5836	19.1687	18.0899	20.4023	19.6747	25.5157	23.4823	25.4239	24.5625	23.6817	15.9759	13.4899
acetoclastic_metagnogenesis.csv	6	6	10.74	10.49	8.57	7.77	9.15	10.05	11.03	8.07	9.21	10.53	8.95	8.51	9.44	9.71	8.91	1.13	1.41	1.23	1.45	1.37	10.16	10.73	10.89	11.54	8.62	1.97	2.14	2.01	1.99	2.4	1.82	2.02	1.94	2.09	2.26	1.61	1.95	1.62	1.92	2.13	4.92	4.39	5.64	4.96	6.16	1.29	1.34
summed data publication			10.7521	10.4875	8.57336	7.76675	9.15929	10.0622	11.021	8.08386	9.20525	10.5265	8.9453	8.51188	9.43978	9.70948	8.92867	1.13974	1.41119	1.23846	1.44167	1.38023	10.1712	10.7214	10.89	11.527	8.6162	1.96729	2.14476	1.99903	1.98221	2.40229	1.81842	2.02086	1.93405	2.09054	2.26998	1.60289	1.94191	1.62638	1.91096	2.12045	4.9286	4.38287	5.64075	4.96373	6.15034	1.27886	1.3259
hydrogenotrophic_methanogenesis.csv	11	11	2.81	2.45	3.04	2.81	2.64	1.54	1.17	1.33	1.14	1.11	1.88	2.23	1.54	1.62	1.86	14.21	13.09	14.32	13.23	11.49	2.43	2.81	2.77	2.14	2.77	10.71	10.01	9.54	9.36	9.56	9.25	11	11.63	10.42	10.29	11.42	11.14	10.16	11.04	10.62	4.6	4.81	4.83	3.93	3.78	8.24	8.98
summed data publication			2.81792	2.45974	3.05621	2.79382	2.63851	1.52746	1.16926	1.35085	1.15536	1.09544	1.88094	2.2321	1.54993	1.61989	1.86164	14.2045	13.0798	14.3087	13.2269	11.4986	2.44515	2.82013	2.77531	2.14136	2.78459	10.71	10.0008	9.53769	9.36405	9.55657	9.24829	11.0053	11.6202	10.4427	10.2867	11.4017	11.1345	10.1685	11.0325	10.6038	4.58977	4.8132	4.83036	3.93083	3.77963	8.23257	8.97849
[truncated: 33 more columns]
